# Supplementary material for: Rapid evolution of female-biased genes among four species of Anopheles malaria mosquitoes
Source: PubMed Central journal article supplement — Genome Res. 2017 Sep;27(9):1536–48. doi: 10.1101/gr.217216.116 (PMC5580713; doi:10.1101/gr.217216.116), 2017-09
Supplement: supp_gr.217216.116_Supplemental_Table_S4.pdf [file supp_gr.217216.116_Supplemental_Table_S4.pdf]

***An. gambiae* genes showing  $\tau > 0.95$  and Testes or Accessory glands classification**

|                     | <b>RNA-seq</b>                                                                                                                                           |          | <b>MozAtlas</b>                                                                                                                                           |          |
|---------------------|----------------------------------------------------------------------------------------------------------------------------------------------------------|----------|-----------------------------------------------------------------------------------------------------------------------------------------------------------|----------|
| <b>Male RT</b>      | Expected                                                                                                                                                 | Observed | Expected                                                                                                                                                  | Observed |
| <i>Autosome</i>     | 410                                                                                                                                                      | 426      | 430                                                                                                                                                       | 443      |
| <i>X chromosome</i> | 27                                                                                                                                                       | 20       | 15                                                                                                                                                        | 4        |
|                     | <div style="text-align: center;">  <p><i>p-value = 0.27</i></p> </div> |          | <div style="text-align: center;">  <p><i>p-value = 0.02</i></p> </div> |          |

---

|                     | <b>Only found with RNA-seq</b> | <b>Found with both RNA-seq and MozAtlas</b> | <b>Only found with MozAtlas</b> |
|---------------------|--------------------------------|---------------------------------------------|---------------------------------|
| <b>Male RT</b>      | Number of genes                | Number of genes                             | Number of genes                 |
| <i>Autosome</i>     | 225                            | 201                                         | 242                             |
| <i>X chromosome</i> | 17                             | 3                                           | 1                               |
