# Supplementary material for: Rapid evolution of female-biased genes among four species of Anopheles malaria mosquitoes
Source: HighWire-hosted journal article supplement (doi:10.1101/gr.217216.116), 2017-07-26
Supplement: Supplemental_References.docx [file Supplemental_References.docx]

**References**

Anders S, Pyl PT, Huber W. 2014. HTSeq A Python framework to work with high-throughput sequencing data. *Bioinformatics* **31**: 166–169.

Baker DA, Russell S. 2011. Role of testis-specific gene expression in sex-chromosome evolution of anopheles gambiae. *Genetics* **189**: 1117–1120.

Baker DA, Nolan T, Fischer B, Pinder A, Crisanti A, Russell S. 2011. A comprehensive gene expression atlas of sex- and tissue-specificity in the malaria vector, Anopheles gambiae. *BMC Genomics* **12**: 296.

Clements A. 1992. *The biology of mosquitoes: Development, Nutrition and Reproduction.*

Fontaine MC, Pease JB, Steele A, Waterhouse RM, Neafsey DE, Sharakhov I V, Jiang X, Hall AB, Catteruccia F, Kakani E, et al. 2015. Mosquito genomics. Extensive introgression in a malaria vector species complex revealed by phylogenomics. *Science* **347**: 1258524.

Giraldo-Calderón GI, Emrich SJ, MacCallum RM, Maslen G, Emrich S, Collins F, Dialynas E, Topalis P, Ho N, Gesing S, et al. 2015. VectorBase: An updated Bioinformatics Resource for invertebrate vectors and other organisms related with human diseases. *Nucleic Acids Res* **43**: D707–D713.

Kim D, Pertea G, Trapnell C, Pimentel H, Kelley R, Salzberg SL. 2013. TopHat2: accurate alignment of transcriptomes in the presence of insertions, deletions and gene fusions. *Genome Biol* **14**: R36.

Kriventseva E V., Tegenfeldt F, Petty TJ, Waterhouse RM, Simão FA, Pozdnyakov IA, Ioannidis P, Zdobnov EM. 2015. OrthoDB v8: Update of the hierarchical catalog of orthologs and the underlying free software. *Nucleic Acids Res* **43**: D250–D256.

Larracuente AM, Sackton TB, Greenberg AJ, Wong A, Singh ND, Sturgill D, Zhang Y, Oliver B, Clark AG. 2008. Evolution of protein-coding genes in Drosophila. *Trends Genet* **24**: 114–123.

Love MI, Huber W, Anders S. 2014 Moderated estimation of fold change and dispersion for RNA-seq data with DESeq2. *Genome Biol* **15**:550.

Meiklejohn CD, Presgraves DC. 2012. Little evidence for demasculinization of the Drosophila X chromosome among genes expressed in the male germline. *Genome Biol Evol* **4**: 1007–1016.

Neafsey DE, Waterhouse RM, Abai MR, Aganezov SS, Alekseyev MA, Allen JE, Amon J, Arca B, Arensburger P, Artemov G, et al. 2014. Highly evolvable malaria vectors: The genomes of 16 Anopheles mosquitoes. *Science (80- )* **347**: 1258522–.

Nielsen R, Yang Z. 1998. Likelihood models for detecting positively selected amino acid sites and applications to the HIV-1 envelope gene. *Genetics*. **3**:929-36.

Sievers F, Wilm A, Dineen D, Gibson TJ, Karplus K, Li W, Lopez R, McWilliam H, Remmert M, Söding J, Thompson JD, Higgins DG. 2011. Fast, scalable generation of high-quality protein multiple sequence alignments using Clustal Omega. *Mol Syst Biol*. 11:7-539

Suyama M, Torrents D, Bork P. 2006. PAL2NAL: robust conversion of protein sequence alignments into the corresponding codon alignments. *Nucleic Acids Research*. **34**:W609-W612.

Vega-Rodríguez J, Ghosh AK, Kanzok SM, Dinglasan RR, Wang S, Bongio NJ, Kalume DE, Miura K, Long CA, Pandey A, Jacobs-Lorena M. 2014. Multiple pathways for Plasmodium ookinete invasion of the mosquito midgut. *Proc Natl Acad Sci U S A*. **4**:E492-500.

Waterhouse RM, Zdobnov EM, Tegenfeldt F, Li J, Kriventseva E V. 2011. OrthoDB: The hierarchical catalog of eukaryotic orthologs in 2011. *Nucleic Acids Res* **39**.

Yanai I, Benjamin H, Shmoish M, Chalifa-Caspi V, Shklar M, Ophir R, Bar-Even A, Horn-Saban S, Safran M, Domany E, et al. 2005. Genome-wide midrange transcription profiles reveal expression level relationships in human tissue specification. *Bioinformatics* **21**: 650–659.

Zhang Y, Sturgill D, Parisi M, Kumar S, Oliver B. 2007. Constraint and turnover in sex-biased gene expression in the genus Drosophila. *Nature* **450**: 233–7.
