# Supplementary material for: Rapid evolution of female-biased genes among four species of Anopheles malaria mosquitoes
Source: HighWire-hosted journal article supplement (doi:10.1101/gr.217216.116), 2017-07-26
Supplement: Supplemental_Table_S1.xlsx [file Supplemental_Table_S1.xlsx]

## Sheet: An. gambiae
geneID	Female_Car1	Female_Car2	Female_Car3	Female_RT1	Female_RT2	Female_RT3	Male_Car1	Male_Car2	Male_Car3	Male_RT1	Male_RT2	Male_RT3	log2FC_Carc	padj_Carc	log2FC_RT	padj_RT	log2FC_M	padj_M	log2FC_F	padj_F	final.class.corr
AGAP000002	156	192	121	908	568	720	243	323	365	147	299	96	0.332296	0.216606	-1.14161	6.82e-08	0.644284	0.0043415	-0.829623	0.000104383	Fe_RT_weak
AGAP000005	291	474	239	5230	2908	3311	441	916	876	226	656	115	0.47775	0.300779	-2.69901	4.45e-14	1.07599	0.00468473	-2.10077	4.61e-09	Fe_RT_strong
AGAP000007	223	359	284	1071	507	559	443	726	796	347	789	215	0.483398	0.166143	0.225072	0.473587	0.414905	0.188982	0.156579	0.626551	unbiased
AGAP000008	305	384	205	3531	2122	2451	377	459	519	217	385	180	-0.0333855	0.898968	-2.4464	2.41e-53	0.627999	0.000286194	-1.78501	2.28e-29	Fe_RT_strong
AGAP000009	505	699	575	458	220	353	1270	2155	2571	313	659	167	1.03256	0.00117681	1.01145	0.000650617	2.24177	7.76e-15	2.22066	1.12e-14	Ma_Car_weak
AGAP000010	117	141	94	311	157	187	104	204	229	57	70	38	-0.0910486	0.768467	-1.00357	7.16e-06	1.44669	1.41e-10	0.534175	0.0108447	unbiased
AGAP000011	458	624	399	286	122	188	185	468	743	57	104	27	-0.840934	0.0374379	-0.735321	0.0545642	2.6274	4.62e-13	2.73301	2.97e-15	unbiased
AGAP000012	34	46	28	191	123	138	24	34	52	15	23	19	-0.652848	0.04785	-2.02757	9.1e-13	0.708083	0.0347235	-0.666637	0.00961293	Fe_RT_weak
AGAP000013	51	97	76	366	194	216	76	130	159	50	118	34	-0.000105697	0.999887	-1.0494	0.000378962	0.695387	0.0290009	-0.353905	0.248308	unbiased
AGAP000014	27	14	4	28	8	8	24	35	27	10	8	1	0.308341	0.757817	-0.128649	0.878249	1.91355	0.0114001	1.47656	0.0384872	unbiased
AGAP000015	34	50	33	31	10	21	68	164	193	49	144	22	1.11769	0.0299053	2.58871	3.5e-08	0.859683	0.0697368	2.3307	1.03e-06	unbiased
AGAP000016	93	112	96	1	0	9	108	162	233	20	33	15	0.0245684	0.955298	3.55494	4.51e-11	2.65121	4.04e-16	6.18158	6.5e-34	unbiased
AGAP000017	194	458	298	1092	699	684	318	904	981	187	693	114	0.471259	0.424576	-0.563538	0.241582	1.04702	0.0289493	0.0122215	0.981445	unbiased
AGAP000018	20	35	24	309	222	234	20	72	77	13	56	14	0.345425	0.553522	-2.38863	9.22e-09	0.861185	0.0645766	-1.87287	6.43e-06	Fe_RT_specific
AGAP000019	132	164	184	2	1	2	238	419	586	6	9	1	0.606925	0.125464	2.37054	0.00197101	5.97115	5.93e-36	7.73477	2.32e-32	unbiased
AGAP000020	140	204	169	291	137	150	98	237	307	60	149	35	-0.431836	0.329624	-0.363162	0.345078	1.2142	0.000924657	1.28287	0.000219206	unbiased
AGAP000021	41	67	48	316	130	170	74	113	123	69	120	63	0.314369	0.300362	-0.307717	0.187564	0.0991774	0.727527	-0.522909	0.0272386	unbiased
AGAP000022	470	542	415	885	598	588	399	610	820	462	851	367	-0.347087	0.0939393	0.595795	0.000660393	-0.0739377	0.733894	0.868944	4.73e-07	unbiased
AGAP000023	537	863	673	62	83	143	816	1049	1460	105	233	175	-0.00648113	0.990565	1.6603	2.5e-05	2.4569	1.75e-10	4.12368	2.22e-27	unbiased
AGAP000025	122	135	73	2084	1491	1616	97	161	218	113	261	74	-0.161034	0.68702	-2.68953	1.34e-24	-0.0644197	0.860422	-2.59292	1.47e-22	Fe_RT_strong
AGAP000028	126	173	75	3201	2046	2262	243	684	536	115	243	51	1.27456	0.00193279	-3.33225	3.84e-20	1.67099	9.91e-06	-2.93582	6.27e-16	Fe_RT_strong
AGAP000029	391	766	534	2848	2059	1960	686	1743	1984	331	1120	212	0.638802	0.196052	-1.28589	0.00158018	1.29386	0.00195189	-0.63083	0.132423	unbiased
AGAP000032	320	563	433	205	79	129	821	1672	1905	908	2169	403	1.00616	0.0230301	3.89764	2.81e-24	0.216653	0.642472	3.10813	8.12e-16	Ma_Ubi_weak
AGAP000033	72	117	91	456	263	302	158	309	332	50	164	28	0.792962	0.065252	-1.27201	0.000634834	1.62741	1.6e-05	-0.437563	0.258147	unbiased
AGAP000035	266	311	217	733	332	365	362	578	652	342	607	179	0.315401	0.357537	0.587594	0.031461	0.334614	0.260135	0.606807	0.0255921	unbiased
AGAP000037	36	123	98	0	2	2	159	485	551	17	25	6	1.42825	0.0166395	4.04035	6.54e-07	4.30029	8.48e-15	6.91239	6.26e-19	Ma_Car_weak
AGAP000038	60	64	63	2	0	1	115	147	224	13	13	5	0.663887	0.0589564	3.9205	9.27e-07	3.71505	1.89e-22	6.97166	1.67e-20	unbiased
AGAP000039	8	13	5	0	1	1	12	25	23	0	2	0	0.547217	0.46652	0.775558	0.582974	4.39671	1.6e-05	4.62505	2.36e-06	unbiased
AGAP000040	181	218	215	265	102	212	85	165	155	52	239	37	-1.30817	0.00847933	-0.0476327	0.924399	0.287314	0.590468	1.54785	0.0004429	Fe_Car_weak
AGAP000041	42	40	29	9	2	2	1249	1965	1292	29	55	19	4.677	1.11e-44	3.80898	1.58e-13	5.2935	4.05e-57	4.42548	4.65e-18	Ma_Car_strong
AGAP000042	112	152	90	1680	975	1120	209	340	485	106	355	92	0.843207	0.0120834	-1.94755	1.13e-11	0.790685	0.0104155	-2.00008	4.68e-12	Fe_RT_weak
AGAP000043	79	194	114	401	320	390	136	415	498	70	239	51	0.690527	0.196305	-0.87253	0.0540341	1.3883	0.00219374	-0.174762	0.723747	unbiased
AGAP000044	404	424	278	3372	1984	2262	291	363	441	269	404	275	-0.674482	4.23e-05	-2.03463	2.54e-45	-0.00948492	0.965527	-1.36963	1.64e-21	Fe_RT_weak
AGAP000045	14	31	17	13	0	7	43	104	121	5	23	0	1.35821	0.12236	1.26526	0.145271	3.10414	7.38e-05	3.01119	0.000148103	unbiased
AGAP000046	415	885	1070	11	6	171	491	674	1446	89	186	60	-0.624205	0.601264	1.51407	0.0994817	2.62043	0.00398286	4.7587	3.8e-08	unbiased
AGAP000047	68	55	67	2	0	4	2161	3089	345	447	621	12	3.94871	0.00146832	7.24411	5.62e-10	2.21416	0.0674366	5.50955	2.82e-06	Ma_Ubi_weak
AGAP000048	97	117	90	918	564	568	149	242	340	75	145	66	0.553685	0.0138236	-1.91778	8.55e-24	1.1393	1.49e-08	-1.33217	2.15e-12	Fe_RT_weak
AGAP000049	215	422	309	751	455	563	262	457	574	151	342	195	-0.255368	0.401744	-0.447258	0.0671012	0.695428	0.00472253	0.503538	0.0342917	unbiased
AGAP000051	11	11	6	1	1	0	40	66	56	1	4	0	1.86966	0.000200093	1.87112	0.0983845	4.73268	6.78e-11	4.73413	3.92e-07	Ma_Car_specific
AGAP000053	96	89	73	267	178	172	61	66	75	54	90	67	-1.01013	0.0001708	-0.593684	0.0143222	-0.25966	0.36799	0.156781	0.541593	unbiased
AGAP000054	205	391	337	415	292	392	319	887	1176	466	1303	270	0.562461	0.292292	1.64241	0.000104987	0.0712717	0.900726	1.15122	0.00725914	unbiased
AGAP000055	28	40	22	26	26	23	58	116	155	67	180	56	1.15373	0.0028957	2.79876	1.21e-15	-0.0425436	0.922793	1.60249	2.18e-05	Ma_Ubi_weak
AGAP000056	7	5	5	2	0	1	17	33	25	3	10	2	1.44055	0.0311963	2.91984	0.00180939	2.15103	0.000522608	3.63032	6.71e-05	unbiased
AGAP000057	66	85	74	99	43	71	102	198	213	79	148	50	0.470796	0.142513	1.29588	2.29e-06	0.698682	0.0116555	1.52377	2.78e-08	unbiased
AGAP000058	98	172	137	106	48	51	190	460	642	137	275	87	0.896485	0.0228478	2.18378	6.19e-10	1.1442	0.00128332	2.43149	5.09e-12	unbiased
AGAP000061	30	78	56	57	21	41	123	198	191	55	111	42	0.969022	0.00860216	1.72321	5.73e-07	1.1362	0.000677479	1.89038	4.66e-08	unbiased
AGAP000062	164	261	223	206	141	175	322	458	597	144	336	139	0.385236	0.164912	1.109	2.12e-06	0.99043	2.19e-05	1.7142	8.42e-14	unbiased
AGAP000063	16	34	23	6	7	9	10	27	30	7	21	8	-0.82537	0.121687	1.52604	0.00542226	0.690148	0.19533	3.04155	1.25e-09	unbiased
AGAP000064	197	345	227	2110	1310	1512	410	723	722	296	628	149	0.588679	0.10449	-1.34938	7.54e-06	0.662261	0.0410384	-1.2758	2.38e-05	Fe_RT_weak
AGAP000065	95	184	111	295	136	206	235	532	604	42	100	24	1.09655	0.00168202	-1.04972	0.00185059	2.85602	1.93e-18	0.709744	0.0298006	Ma_Car_weak
AGAP000066	79	112	83	18	6	21	79	142	181	51	83	38	-0.155639	0.671823	2.84672	1.78e-17	0.994573	0.000331306	3.99693	7.24e-35	unbiased
AGAP000067	7	30	20	0	0	0	60	62	80	8	12	10	1.18706	0.0293471	5.68004	5.61e-06	2.52259	9.32e-07	7.01558	1.13e-08	Ma_Car_weak
AGAP000068	6	19	25	1	1	0	36	90	101	37	32	25	1.37965	0.0281052	5.91309	1.35e-10	0.911482	0.114055	5.44492	4.76e-09	Ma_Ubi_weak
AGAP000069	3	2	1	0	0	0	3	5	1	0	0	0	0.0244395	NA	0.537501	0.809412	4.02417	0.0256742	4.53723	0.00718824	not_expressed
AGAP000070	81	134	85	431	263	292	83	164	240	82	164	62	-0.0200501	0.959589	-0.778589	0.00242632	0.443708	0.115502	-0.314831	0.239026	unbiased
AGAP000071	0	0	0	0	0	0	0	0	0	36	36	21	-0.36833	0.903811	8.3433	9.37e-08	-7.90544	1.7e-06	0.806181	0.712285	Ma_RT_specific
AGAP000072	0	0	0	1	0	1	0	0	0	22	18	16	-0.385915	0.898864	5.57586	4.51e-07	-7.00802	1.42e-05	-1.04624	0.591425	Ma_RT_specific
AGAP000073	9	2	4	6	0	0	17	30	33	10	30	4	1.62026	0.0740421	3.56721	6.49e-05	0.763797	0.352546	2.71074	0.00392133	unbiased
AGAP000074	1	1	0	0	0	1	0	1	2	0	0	0	-0.0823827	NA	-0.829415	0.704227	2.37444	0.257841	1.62741	0.398042	not_expressed
AGAP000075	18	36	12	16	10	46	51	83	102	136	526	168	1.17474	0.0637858	4.19855	7.62e-16	-1.87053	0.00038408	1.15327	0.0441494	Ma_RT_specific
AGAP000076	359	743	651	330	181	274	759	1121	1661	351	748	215	0.287138	0.521878	1.59371	2.26e-06	1.26759	0.000229315	2.57417	7.73e-15	unbiased
AGAP000078	26	36	28	210	164	197	49	75	102	41	82	61	0.627703	0.0637037	-0.716542	0.00560965	0.0645848	0.854002	-1.27966	3.5e-06	unbiased
AGAP000079	40	58	38	11	6	2	94	124	150	24	39	24	0.770084	0.00590534	3.09885	1.01e-13	1.87063	2.34e-12	4.1994	1.6e-25	unbiased
AGAP000080	18	28	21	16	14	27	33	93	123	13	38	16	1.12578	0.0228568	1.05285	0.0282674	1.65026	0.000222075	1.57732	0.000697013	Ma_Car_weak
AGAP000081	70	92	92	342	162	208	119	192	281	62	99	31	0.478865	0.184721	-0.943327	0.00189196	1.40572	4.24e-06	-0.0164706	0.960227	unbiased
AGAP000082	197	273	207	785	449	558	168	190	271	126	256	103	-0.776792	0.00021268	-0.977052	2.69e-07	0.217405	0.333019	0.0171441	0.93379	unbiased
AGAP000083	28	40	21	339	198	227	32	60	57	72	125	41	0.0722585	0.881595	-0.770051	0.0025602	-0.849361	0.00305787	-1.69167	1.06e-09	unbiased
AGAP000084	28	37	20	89	44	62	74	69	83	60	78	39	0.787563	0.0283403	0.828191	0.00555926	0.176853	0.612081	0.217481	0.533262	unbiased
AGAP000085	0	1	0	3	2	0	0	0	1	0	1	0	-0.433939	NA	-1.12776	0.573107	-0.0768288	0.975384	-0.770653	0.705632	not_expressed
AGAP000086	258	319	236	283	175	232	402	736	1080	658	1481	444	0.709634	0.021605	2.73802	4.7e-25	-0.39161	0.184585	1.63678	1.49e-09	unbiased
AGAP000088	2	3	6	0	0	3	4	14	18	9	11	17	0.873036	0.405393	4.24221	1.15e-05	-0.409901	0.640527	2.95928	0.00421779	not_expressed
AGAP000090	164	205	146	468	262	377	309	614	705	200	648	120	0.9357	0.0219307	0.580471	0.120411	0.664558	0.0833019	0.309328	0.424405	unbiased
AGAP000091	60	93	55	1	0	3	75	129	189	9	16	7	0.216802	0.572969	3.62892	7.85e-07	3.36217	7.59e-20	6.77429	3.86e-23	unbiased
AGAP000092	303	344	240	188	117	147	268	360	475	110	164	131	-0.365317	0.0615135	0.808	1.16e-05	1.20244	6.86e-12	2.37575	5.84e-44	unbiased
AGAP000093	83	97	75	297	189	217	116	183	216	111	195	115	0.324874	0.113504	0.195771	0.24557	0.0767005	0.700278	-0.0524033	0.781456	unbiased
AGAP000094	353	338	326	18	7	13	301	386	603	10	15	6	-0.376326	0.207083	0.655034	0.148063	5.12156	4.49e-49	6.15292	2.8e-78	unbiased
AGAP000095	534	543	385	398	224	310	416	691	891	386	794	317	-0.255959	0.270229	1.57601	1.53e-17	0.231177	0.266526	2.06315	2.78e-29	unbiased
AGAP000096	92	106	76	154	72	94	79	93	125	62	105	89	-0.551993	0.0379892	0.672173	0.00414433	-0.0118507	0.970004	1.21232	9.17e-08	unbiased
AGAP000097	362	191	142	329	177	244	213	303	348	43	105	44	-0.370066	0.383874	-1.06083	0.00224598	2.00699	4.83e-09	1.31622	6.03e-05	unbiased
AGAP000098	24	30	20	221	139	151	30	38	77	14	27	18	0.265974	0.535761	-2.16336	2.5e-12	1.05288	0.0022131	-1.37645	3.9e-06	Fe_RT_weak
AGAP000099	189	269	180	830	480	565	177	407	437	144	321	129	-0.0371483	0.910865	-0.761948	0.00040001	0.581889	0.0105711	-0.142911	0.543442	unbiased
AGAP000100	12	9	10	0	2	3	6	4	7	1	2	0	-1.4997	0.0719529	0.144142	0.907737	2.16624	0.0416415	3.81008	6.39e-06	unbiased
AGAP000102	248	296	255	517	335	437	206	285	409	126	270	189	-0.535609	0.02348	-0.211739	0.346093	0.398716	0.0781774	0.722585	0.00042395	unbiased
AGAP000104	35	118	134	31	11	13	189	236	325	53	84	43	0.656647	0.244699	2.66221	7.13e-08	1.83151	9.53e-05	3.83707	2.1e-15	unbiased
AGAP000105	44	55	43	247	160	178	50	92	108	40	61	43	0.116774	0.729213	-1.07073	9.54e-07	0.554559	0.0240433	-0.632941	0.00431212	Fe_RT_weak
AGAP000106	166	224	208	206	141	169	128	193	290	143	257	217	-0.696024	0.018338	1.20804	3.11e-06	-0.281147	0.340377	1.62292	2.4e-10	unbiased
AGAP000107	13	15	12	16	8	15	21	21	30	177	360	211	0.175689	0.73735	5.16423	1.25e-62	-3.5489	8.72e-40	1.43964	0.000251393	Ma_RT_specific
AGAP000108	23	18	10	1	0	0	19	20	20	0	0	0	-0.406691	0.56475	-0.286384	0.878852	6.17995	1.93e-05	6.30026	1.39e-08	unbiased
AGAP000109	1648	1503	1020	1993	1077	1369	1351	1629	2205	983	1820	1176	-0.354387	0.0836516	0.799461	3.82e-06	0.179586	0.364561	1.33343	4.74e-15	unbiased
AGAP000110	112	101	75	237	172	157	103	118	150	44	69	54	-0.299016	0.333513	-0.809506	0.00130101	0.9343	0.000339423	0.42381	0.084048	unbiased
AGAP000111	0	0	0	3	4	0	0	0	0	15	21	15	-0.405233	0.893334	3.69352	2.19e-05	-6.6296	2.69e-05	-2.53085	0.13812	unbiased
AGAP000112	165	197	134	632	385	456	170	255	288	123	208	77	-0.15248	0.544338	-0.937487	3.45e-07	0.62251	0.00152817	-0.162497	0.406692	unbiased
AGAP000113	16	30	20	2	1	0	179	261	136	21	69	12	2.49283	4.83e-06	5.4056	1.11e-10	2.47475	1.16e-06	5.38751	1.49e-10	Ma_Car_strong
AGAP000114	9	15	7	272	140	150	23	23	40	9	33	10	0.80018	0.110059	-2.51839	8.52e-13	0.584068	0.171996	-2.73451	1.3e-12	Fe_RT_specific
AGAP000115	0	0	0	0	0	2	0	0	0	15	25	12	-0.382868	0.899164	5.32887	1.53e-06	-6.81424	2.74e-05	-1.1025	0.570441	unbiased
AGAP000116	67	62	56	547	311	378	63	97	118	53	95	40	-0.109568	0.72721	-1.78391	1.37e-19	0.367552	0.120116	-1.30679	3.39e-11	Fe_RT_weak
AGAP000117	48	63	46	16	20	78	38	67	72	23	51	23	-0.512648	0.480502	0.555023	0.361387	0.674248	0.282563	1.74192	0.00170981	unbiased
AGAP000118	87	139	108	211	113	113	83	124	166	62	113	93	-0.536202	0.0657587	0.2802	0.299244	0.230094	0.430737	1.0465	2.04e-05	unbiased
AGAP000119	70	90	72	381	201	265	84	113	145	75	108	61	-0.122933	0.656498	-0.830668	7.41e-06	0.270328	0.215971	-0.437407	0.0213746	unbiased
AGAP000120	125	113	77	470	282	368	108	123	154	75	127	72	-0.370044	0.137337	-1.09127	3.85e-08	0.301569	0.194334	-0.419654	0.0374021	Fe_RT_weak
AGAP000121	2	4	5	3	0	1	3	18	20	0	7	0	1.02648	0.423294	1.40289	0.268839	2.32499	0.0362309	2.70141	0.0191026	not_expressed
AGAP000123	3	4	5	23	6	8	3	11	16	3	11	1	0.52262	0.617407	-0.370568	0.661085	0.806581	0.343644	-0.086607	0.917452	not_expressed
AGAP000124	58	68	62	436	192	234	60	144	172	54	111	35	0.248764	0.548148	-1.17156	0.00010223	0.703087	0.0313333	-0.717235	0.0190204	Fe_RT_weak
AGAP000126	100	108	93	406	149	198	111	168	232	116	304	101	0.048423	0.91165	0.389196	0.182679	-0.168207	0.61496	0.172566	0.580522	unbiased
AGAP000127	54	61	34	298	212	249	55	73	60	53	94	51	-0.300695	0.371899	-1.02343	1.33e-05	-0.244512	0.403844	-0.967251	6.44e-05	Fe_RT_weak
AGAP000128	155	163	98	1	1	0	306	481	381	22	29	10	0.844679	0.00674642	5.17566	5.3e-10	4.06223	2.35e-36	8.39321	2.21e-25	unbiased
AGAP000129	898	667	623	13	6	21	1614	2497	3427	196	269	148	1.04779	0.000686859	4.82778	2.04e-41	3.35063	5.64e-33	7.13062	4.11e-91	Ma_Car_weak
AGAP000130	19	21	12	26	14	33	31	59	39	19	74	12	0.649615	0.316851	1.26521	0.0142476	0.268291	0.652314	0.883883	0.102397	unbiased
AGAP000131	85	103	63	18	15	53	188	268	356	57	155	79	1.00503	0.0344221	2.55024	3.67e-09	1.30006	0.00231639	2.84527	4.05e-11	Ma_Car_weak
AGAP000132	130	120	69	45	33	48	79	95	130	33	83	97	-0.72169	0.118024	1.69784	2.44e-05	0.2636	0.569736	2.68313	7.6e-12	unbiased
AGAP000133	8	4	0	182	101	95	1	3	3	16	21	20	-1.36581	0.135671	-1.70979	4.01e-05	-3.16027	2.91e-06	-3.50425	1.75e-10	Fe_RT_weak
AGAP000134	6	6	0	348	198	174	0	0	4	10	14	13	-2.05874	0.0372477	-3.26316	2.14e-14	-3.24001	5.7e-05	-4.44442	2.84e-16	Fe_RT_specific
AGAP000135	10	5	0	218	78	105	2	0	0	6	8	9	-3.03839	0.00812114	-2.99916	6.81e-07	-3.25754	0.00162732	-3.21831	5.22e-07	Fe_RT_strong
AGAP000136	30	25	18	141	85	102	18	20	50	16	40	23	-0.440505	0.356506	-1.12776	0.00108527	-0.0610719	0.902902	-0.748324	0.0332148	unbiased
AGAP000137	17	29	25	0	0	0	57	65	126	35	59	11	1.08139	0.0528017	7.24582	1.33e-09	1.06214	0.0340946	7.22657	1.45e-09	unbiased
AGAP000138	13	24	16	1	2	3	31	88	77	27	37	4	1.14933	0.0919622	4.10405	7.18e-08	1.29833	0.0321291	4.25304	2.52e-08	unbiased
AGAP000139	28	52	39	129	111	112	28	32	70	23	47	42	-0.576012	0.216903	-0.72564	0.0543639	-0.0463145	0.928034	-0.195942	0.629529	unbiased
AGAP000140	12	14	11	18	26	14	4	10	3	5	8	8	-1.73775	0.0167748	-0.565263	0.389131	-0.508229	0.519747	0.664257	0.269111	not_expressed
AGAP000141	195	306	206	1037	707	806	217	384	613	159	416	144	0.0522897	0.901084	-0.984845	0.000226854	0.575852	0.0446791	-0.461283	0.0936397	unbiased
AGAP000142	115	214	163	662	407	469	180	337	429	124	322	102	0.221535	0.56314	-0.638319	0.0272127	0.62912	0.0370065	-0.230733	0.449819	unbiased
AGAP000143	233	244	231	545	366	520	85	151	202	33	130	20	-1.42212	0.000897859	-2.20224	2.68e-08	1.17735	0.00529336	0.397233	0.333706	Fe_Ubi_weak
AGAP000144	99	67	44	58	24	36	36	82	91	11	36	7	-0.722901	0.127799	-0.247114	0.624745	1.7846	6.22e-05	2.26038	1.65e-08	unbiased
AGAP000145	262	545	254	2965	1596	1952	428	935	866	408	1063	262	0.40535	0.330229	-1.06542	0.00109935	0.2448	0.522077	-1.22597	0.000157187	Fe_RT_weak
AGAP000146	22	72	51	269	177	195	56	137	198	58	193	44	0.672408	0.238181	-0.332484	0.502503	0.263709	0.627511	-0.741183	0.117889	unbiased
AGAP000147	108	146	85	1649	1224	1114	52	102	151	112	250	59	-0.861718	0.025992	-2.40681	5.74e-14	-0.625839	0.0857458	-2.17093	1.5e-11	Fe_RT_strong
AGAP000149	153	215	159	824	559	665	222	355	460	166	317	133	0.27542	0.236736	-0.841013	4.05e-06	0.555257	0.00424711	-0.561176	0.00249573	unbiased
AGAP000150	796	395	415	0	0	0	11	22	38	1	1	0	-5.21477	1.51e-28	2.19264	0.149991	4.43475	4.94e-06	11.8422	1.56e-22	Fe_Car_strong
AGAP000151	203	44	35	0	0	0	0	0	0	0	0	1	-9.32739	1.01e-08	1.87243	0.315152	-1.40214	0.496701	9.79768	4.18e-11	Fe_Car_specific
AGAP000152	24	7	4	0	0	0	0	0	0	0	0	0	-6.86289	0.000245606	0.503629	0.823561	-0.105303	0.969253	7.26121	1.44e-05	Fe_Car_specific
AGAP000153	26	38	35	17	3	2	121	178	180	60	122	20	1.56509	0.005481	4.04605	1.71e-12	1.13743	0.0303882	3.61838	5.02e-10	Ma_Car_specific
AGAP000154	202	293	407	11	180	107	73	100	132	0	185	5	-2.02738	0.218343	-0.389065	0.802253	0.803939	0.616203	2.44226	0.0758442	unbiased
AGAP000155	16	31	11	152	74	77	14	14	21	5	14	12	-0.863657	0.0810194	-2.2878	2.25e-08	0.453572	0.38647	-0.970573	0.00995545	Fe_RT_weak
AGAP000156	13	9	8	4	4	2	38	59	73	15	24	17	1.79647	2.68e-05	3.33698	1.72e-09	1.36562	0.000174618	2.90613	6.2e-07	Ma_Car_weak
AGAP000158	107	111	76	939	587	671	80	132	189	55	149	48	-0.25978	0.427025	-2.25721	3.12e-21	0.507187	0.0631623	-1.49025	2.74e-10	Fe_RT_weak
AGAP000159	267	322	92	6853	4066	4694	180	370	452	154	426	121	-0.105244	0.854383	-3.61477	3.02e-24	0.370127	0.379346	-3.1394	1.23e-18	Fe_RT_strong
AGAP000160	0	0	0	0	0	0	1	0	1	1	2	1	2.01238	NA	3.66019	0.052295	-0.985009	0.61496	0.6628	0.762979	not_expressed
AGAP000161	70	119	84	496	298	335	126	204	269	121	217	81	0.434474	0.120574	-0.52027	0.023492	0.31904	0.207373	-0.635704	0.00611478	unbiased
AGAP000162	231	290	182	696	376	420	104	154	277	52	153	73	-1.10171	3.3e-05	-1.51429	1.3e-09	0.746183	0.00566477	0.3336	0.188219	Fe_Ubi_weak
AGAP000163	46	32	35	41	16	17	37	79	72	168	176	104	0.00733868	0.988662	3.60826	2.86e-23	-1.52059	1.47e-05	2.08033	7.11e-08	Ma_RT_strong
AGAP000164	1	5	3	8	3	1	1	10	6	3	6	0	0.179238	0.907446	0.477188	0.682487	0.686223	0.562001	0.984173	0.363871	not_expressed
AGAP000165	352	435	294	162	97	165	370	433	788	312	484	415	-0.136451	0.70958	2.47861	2.66e-22	0.119414	0.702177	2.73448	8.5e-27	unbiased
AGAP000166	9	4	3	165	1	1	9	15	4	4	2	3	0.179725	0.92368	-2.41608	0.0596122	1.19191	0.408678	-1.4039	0.275956	unbiased
AGAP000167	2241	2126	1667	6927	3627	4128	2203	2987	5149	633	1563	712	0.0524513	0.880095	-1.42543	3.26e-11	1.64146	2.98e-14	0.163581	0.490359	unbiased
AGAP000168	11	8	12	37	25	12	14	33	28	15	33	15	0.535914	0.397324	0.67452	0.15801	0.0586063	0.923701	0.197212	0.721225	unbiased
AGAP000169	28	29	21	349	211	214	17	20	30	18	28	11	-0.892479	0.0150064	-2.81478	4.9e-23	0.0341085	0.941499	-1.8882	1.4e-12	Fe_RT_specific
AGAP000170	2195	2072	1761	501	306	406	3948	4992	7104	453	758	550	0.711401	0.000233862	1.49339	2.44e-16	2.94777	1.08e-63	3.72977	4.52e-99	unbiased
AGAP000171	291	410	289	932	594	593	361	708	828	345	723	196	0.222454	0.552781	0.108536	0.733722	0.421568	0.166708	0.307649	0.294958	unbiased
AGAP000172	33	42	36	178	100	115	45	65	94	48	79	42	0.180198	0.597505	-0.26866	0.262535	0.0539818	0.862551	-0.394877	0.110037	unbiased
AGAP000173	177	145	126	513	314	366	155	209	182	61	129	79	-0.375197	0.181681	-1.21619	1.47e-07	0.855325	0.000478339	0.0143369	0.954586	unbiased
AGAP000175	133	232	156	711	508	537	179	388	539	114	302	62	0.347076	0.471793	-1.07833	0.00352404	1.05673	0.00566697	-0.368677	0.341286	unbiased
AGAP000176	9	8	3	146	62	102	1	3	12	37	50	48	-1.00887	0.17826	-0.164002	0.720283	-3.32829	4.9e-10	-2.48342	5.28e-07	unbiased
AGAP000177	0	0	0	1	0	1	0	0	0	57	58	61	-0.414226	0.890737	7.21557	6.55e-13	-8.52551	2.13e-08	-0.895716	0.639541	Ma_RT_specific
AGAP000178	237	268	176	668	339	384	289	420	592	209	380	172	0.241539	0.263101	0.0734822	0.709265	0.570564	0.00130918	0.402508	0.0215382	unbiased
AGAP000179	1392	1414	1117	375	145	293	53	127	143	45	108	42	-4.31877	5.34e-59	-1.12802	8.22e-05	0.526495	0.0986748	3.71724	1.55e-47	Fe_Car_strong
AGAP000180	1219	1647	1194	1855	962	1174	132	256	270	55	159	95	-3.31933	2.12e-66	-2.75189	3.14e-42	0.889087	5.24e-05	1.45653	5.09e-15	Fe_Car_strong
AGAP000181	228	212	143	24	13	49	4	9	9	1001	1193	339	-5.29597	3.05e-20	5.69247	3.26e-31	-6.91867	6.22e-36	4.06977	2.21e-16	Ma_RT_specific
AGAP000182	402	609	665	15	2	45	330	320	639	33	36	24	-1.07846	0.148508	1.51466	0.0247131	3.43069	7.08e-08	6.02382	6.61e-22	unbiased
AGAP000183	51	117	103	0	0	6	81	85	83	7	14	7	-0.746096	0.186612	2.90204	0.000106559	2.97329	2.77e-08	6.62142	3.89e-22	unbiased
AGAP000184	4534	8079	8725	716	323	930	4998	6240	10008	1122	2022	965	-0.735073	0.103743	1.96125	2.24e-07	2.14943	1.76e-08	4.84575	4.45e-39	unbiased
AGAP000185	21	43	28	322	193	187	22	100	97	15	65	12	0.485322	0.458051	-2.11607	1.5e-05	1.09945	0.0383862	-1.50194	0.00214949	Fe_RT_weak
AGAP000186	1	0	0	23	11	11	0	1	1	1	3	3	0.107412	0.961775	-1.66337	0.0594878	-1.79223	0.169022	-3.56301	0.00489773	unbiased
AGAP000187	146	210	161	533	307	341	260	367	458	118	211	86	0.383673	0.0722001	-0.584123	0.00176657	1.19991	8.26e-11	0.232113	0.22407	unbiased
AGAP000188	81	105	99	77	71	47	296	518	422	82	113	46	1.4172	2.48e-05	1.19475	0.000332437	2.15044	8.53e-12	1.92799	2.65e-09	Ma_Car_weak
AGAP000189	124	177	114	1219	965	1048	154	248	374	106	271	118	0.195955	0.542326	-1.8564	3.66e-16	0.46108	0.0714116	-1.59128	4.01e-12	Fe_RT_weak
AGAP000190	12	13	8	4	10	21	7	23	13	2	23	3	-0.300345	0.798693	0.244779	0.793251	0.593676	0.528551	1.1388	0.166671	unbiased
AGAP000191	10	12	5	5	2	4	9	11	9	5	5	0	-0.502255	0.545044	0.777006	0.359155	1.32944	0.0828353	2.6087	0.000188513	unbiased
AGAP000192	0	0	0	14	10	11	0	0	0	0	0	0	-0.329331	0.912702	-5.58377	0.00146376	-0.104635	0.969253	-5.35907	0.00243688	not_expressed
AGAP000193	0	0	0	0	0	0	0	0	0	0	0	0	NA	NA	NA	NA	NA	NA	NA	NA	not_expressed
AGAP000194	3	2	1	3	5	9	3	4	5	2	8	1	0.306789	0.834033	0.103062	0.916013	0.0351361	0.976584	-0.168591	0.869879	not_expressed
AGAP000195	98	169	112	354	185	211	160	263	347	123	243	72	0.324874	0.346044	0.12349	0.687622	0.639918	0.0241543	0.438535	0.11608	unbiased
AGAP000196	17	19	7	252	89	121	13	11	18	15	16	7	-0.659939	0.257076	-2.5468	8.14e-10	-0.061371	0.923456	-1.94823	1.89e-06	Fe_RT_specific
AGAP000198	35	67	71	9	8	11	209	384	317	38	78	18	1.67068	0.000123899	3.02891	3.55e-10	2.6113	1.56e-10	3.96953	5e-17	Ma_Car_specific
AGAP000199	126	143	102	740	353	458	116	162	257	63	144	51	-0.174376	0.569944	-1.66542	9.63e-14	0.872855	0.000277382	-0.618188	0.00539143	Fe_RT_weak
AGAP000200	3	6	1	1	1	3	4	5	10	5	3	4	0.270126	0.830835	2.10102	0.0278906	0.333219	0.738273	2.16411	0.0259076	not_expressed
AGAP000201	31	75	48	207	108	142	28	46	57	35	49	41	-0.906598	0.00880404	-0.872845	0.00318666	-0.188394	0.616212	-0.154641	0.630635	unbiased
AGAP000202	24	35	23	54	47	49	44	57	68	20	55	17	0.378327	0.369179	0.135281	0.718791	0.73925	0.0322262	0.496204	0.148164	unbiased
AGAP000203	67	130	82	554	277	317	133	252	304	50	101	30	0.603053	0.060617	-1.74146	3.84e-10	1.73378	1.03e-09	-0.610736	0.0280282	Fe_RT_weak
AGAP000204	41	35	27	4	0	1	45	41	36	30	38	20	-0.361349	0.504041	4.87294	3.48e-12	0.319709	0.507495	5.554	1.26e-15	unbiased
AGAP000205	48	74	57	380	206	266	96	156	240	116	254	75	0.733533	0.0296458	-0.0596037	0.852171	-0.0256206	0.947796	-0.818757	0.00517028	unbiased
AGAP000206	0	8	6	1	8	3	19	20	12	4	4	6	1.23399	0.281713	0.99304	0.336304	1.57481	0.110135	1.33386	0.185599	unbiased
AGAP000207	133	134	92	555	341	404	198	309	359	104	182	56	0.581998	0.0309184	-1.02779	1.09e-05	1.16349	1.1e-06	-0.446291	0.062486	unbiased
AGAP000208	12	19	9	51	31	24	29	38	38	5	36	6	0.752128	0.231206	-0.380387	0.494675	1.12582	0.0363248	-0.0066919	0.991413	unbiased
AGAP000209	40	58	40	51	27	44	129	219	192	53	87	26	1.29511	3.37e-05	1.34671	1.5e-05	1.52875	1.26e-07	1.58035	4.03e-07	Ma_Car_weak
AGAP000210	302	102	69	13	5	8	167	403	364	24	25	8	0.248081	0.755408	2.05557	0.00130079	3.69239	8.14e-11	5.49988	1.87e-20	unbiased
AGAP000211	971	901	439	79	41	102	221	362	432	55	70	32	-1.8461	1.35e-07	0.440397	0.258378	2.43466	3.97e-12	4.72117	3.61e-45	Fe_Car_weak
AGAP000213	22	53	40	0	0	0	33	49	55	0	1	0	-0.418172	0.445782	1.67782	0.323739	6.18451	2.71e-08	8.2805	8.68e-11	unbiased
AGAP000214	32	54	38	2	2	0	80	159	174	16	22	10	1.0315	0.00154202	4.21938	3.96e-09	2.85543	2.52e-17	6.04332	2.05e-18	Ma_Car_weak
AGAP000215	10	11	22	2	0	3	21	62	75	1	4	0	1.03001	0.162064	0.820194	0.457722	4.56676	5.06e-08	4.35694	1.32e-07	unbiased
AGAP000216	2	2	0	3	1	3	0	0	1	73	113	119	-2.0379	0.191889	6.32951	1.66e-21	-7.77541	1.66e-12	0.591998	0.577116	Ma_RT_specific
AGAP000217	10	15	8	0	0	0	16	38	67	1	7	0	1.12021	0.11432	3.8825	0.00582043	3.64629	1.35e-06	6.40858	1.1e-06	unbiased
AGAP000218	18	44	32	56	15	21	66	117	144	15	32	11	1.08801	0.0126494	0.316174	0.504958	2.2816	2.23e-08	1.50976	0.000225372	Ma_Car_weak
AGAP000219	7	10	6	0	0	0	144	219	278	0	1	0	4.11724	3.16e-24	1.69211	0.31824	8.42098	3.44e-15	5.99585	3.93e-06	Ma_Car_specific
AGAP000220	306	814	601	286	170	222	548	719	1035	155	249	117	-0.264374	0.521635	0.546111	0.0991793	1.92457	7.38e-10	2.73506	2.78e-19	unbiased
AGAP000222	210	372	230	785	632	672	538	1181	1090	869	1845	380	1.08926	0.00776429	1.34922	0.000200813	-0.268089	0.529527	-0.00812806	0.984683	Ma_Ubi_weak
AGAP000223	42	73	39	407	224	280	69	157	190	36	86	20	0.722581	0.0559005	-1.80247	1.69e-08	1.36738	4.28e-05	-1.15767	0.000283078	Fe_RT_weak
AGAP000225	3	2	6	0	0	0	10	21	33	5	5	1	1.71627	0.0460997	4.52127	0.0014069	2.21969	0.00431618	5.02469	0.000335729	not_expressed
AGAP000226	0	0	0	0	0	0	0	2	4	0	1	0	2.9726	NA	1.64598	0.440672	1.87409	0.386693	0.547469	0.801479	not_expressed
AGAP000228	39	71	53	31	11	25	163	363	415	207	531	110	1.78224	3.84e-05	4.45007	1.42e-26	0.0214864	0.968932	2.68932	5.41e-10	Ma_Ubi_weak
AGAP000230	2	5	4	0	0	0	4	7	10	1	1	0	0.241293	0.852307	2.51732	0.139277	2.9397	0.0132579	5.21572	0.000440474	not_expressed
AGAP000232	13	31	27	10	1	8	63	193	243	10	20	2	1.99784	0.00103779	1.60561	0.0200947	3.6767	4.69e-10	3.28448	2.44e-07	Ma_Car_specific
AGAP000233	34	54	47	11	11	9	77	148	229	10	15	2	0.991442	0.0217301	0.670332	0.228212	3.78968	5.53e-17	3.46857	7.13e-15	unbiased
AGAP000234	51	114	95	223	127	151	80	193	204	51	90	36	0.139879	0.769939	-0.576005	0.0940552	1.19578	0.000423609	0.479901	0.153757	unbiased
AGAP000235	422	373	211	7472	2852	3525	320	665	754	633	1043	490	0.0816422	0.847629	-1.66939	3.16e-10	-0.549727	0.0587256	-2.30076	4.09e-18	Fe_RT_weak
AGAP000236	70	138	117	26	13	23	341	730	636	44	121	25	1.66573	4.37e-05	2.40725	1.5e-08	3.03259	2.49e-15	3.7741	5.84e-20	Ma_Car_weak
AGAP000237	42	60	44	111	74	84	77	119	112	50	126	12	0.404296	0.518728	0.255049	0.629787	0.660279	0.200417	0.511031	0.303704	unbiased
AGAP000238	659	841	623	98	48	152	667	1089	1304	239	583	236	-0.172216	0.711753	2.66501	4.92e-16	1.3654	3.64e-05	4.20263	1.47e-38	unbiased
AGAP000239	5	6	4	0	0	2	1	5	7	3	1	0	-0.908795	0.459603	1.6505	0.216516	1.24795	0.300583	3.80725	0.000983959	not_expressed
AGAP000240	64	82	62	347	191	228	33	49	81	37	57	32	-1.04979	3.93e-05	-1.64287	3.36e-13	0.139134	0.649295	-0.453942	0.0368628	Fe_RT_weak
AGAP000241	322	243	243	175	139	184	308	479	506	140	303	132	-0.0295761	0.938233	1.05946	3.85e-05	1.00407	9.86e-05	2.0931	4.63e-17	unbiased
AGAP000242	32	34	25	294	162	174	18	18	29	18	46	17	-1.15207	0.00121132	-2.03504	1.47e-13	-0.475185	0.194588	-1.35816	4.59e-07	Fe_RT_weak
AGAP000243	30	44	27	69	30	34	83	110	131	58	102	64	1.01509	0.000165656	1.71921	1.08e-12	0.3284	0.18229	1.03252	0.000120317	Ma_Ubi_weak
AGAP000244	0	0	0	2	7	3	0	2	1	7	6	11	1.80137	0.407091	1.82181	0.0645418	-3.13299	0.0083541	-3.11255	0.0564119	not_expressed
AGAP000245	30	56	32	224	121	140	77	127	147	50	89	29	0.893941	0.00260464	-0.604996	0.0204068	0.874588	0.00103133	-0.624349	0.0203688	unbiased
AGAP000246	12	17	20	13	17	24	12	21	36	6	18	10	-0.257698	0.725023	0.162538	0.793305	0.786251	0.176593	1.20649	0.0201215	unbiased
AGAP000247	11	19	12	43	19	50	34	46	43	26	58	35	0.894065	0.0551771	1.00899	0.00557101	-0.120709	0.788876	-0.00578094	0.990598	unbiased
AGAP000248	43	73	40	320	183	244	46	77	110	48	81	41	-0.107158	0.763588	-1.19516	6.71e-08	0.229259	0.40441	-0.858744	0.000136505	Fe_RT_weak
AGAP000249	405	262	192	176	113	175	199	296	464	93	182	79	-0.559709	0.123443	0.494165	0.134206	1.22444	0.000111583	2.27832	3.83e-14	unbiased
AGAP000250	36	55	43	211	93	141	39	50	47	30	27	23	-0.630803	0.0884234	-1.43747	3.77e-06	0.52462	0.147329	-0.282046	0.371159	unbiased
AGAP000251	43	45	29	338	215	211	52	85	108	33	84	34	0.373849	0.244508	-1.43911	8.74e-10	0.516969	0.054643	-1.29599	8.6e-08	Fe_RT_weak
AGAP000252	417	518	381	391	218	337	345	418	699	199	418	226	-0.542935	0.0120317	0.750794	0.000135926	0.594226	0.00323332	1.88795	1.58e-23	unbiased
AGAP000253	141	123	110	2	1	3	253	306	403	8	23	22	0.674162	0.0361454	3.86282	1.04e-09	3.9549	5.44e-33	7.14356	4.33e-33	unbiased
AGAP000254	19	45	21	11	9	8	98	308	171	23	45	13	2.0746	7.36e-06	2.34964	4.01e-06	2.62547	1.85e-09	2.90051	7.86e-09	Ma_Car_weak
AGAP000255	138	279	189	779	377	491	478	910	844	332	687	179	1.19112	0.000549714	0.423904	0.202543	0.757898	0.0220895	-0.00931932	0.979625	Ma_Car_weak
AGAP000256	5	5	3	1	2	0	6	5	2	0	2	1	-0.531955	0.677372	0.754536	0.585946	1.88691	0.114273	3.1734	0.00337986	not_expressed
AGAP000258	79	79	56	405	264	282	62	122	167	67	176	77	-0.00776612	0.98372	-0.691402	0.0041722	-0.0601757	0.852825	-0.743812	0.00246106	unbiased
AGAP000260	1001	771	626	354	230	295	1659	1927	1540	210	353	282	0.47043	0.175575	0.89825	0.00234506	2.41845	1.74e-17	2.84627	5.57e-24	unbiased
AGAP000261	104	151	102	603	369	403	100	143	159	152	211	138	-0.496658	0.0161745	-0.490703	0.00329485	-0.543072	0.00310476	-0.537117	0.00168395	unbiased
AGAP000262	3	2	0	0	0	0	2	1	2	1	3	1	-0.529588	NA	3.67067	0.0274658	-0.0898884	0.959039	4.11037	0.0123299	not_expressed
AGAP000264	237	258	141	3016	2439	2804	223	324	466	199	530	222	-0.010766	0.976372	-2.28349	1.57e-22	-0.0665263	0.833025	-2.33925	3.3e-23	Fe_RT_weak
AGAP000266	3	0	0	0	3	0	0	7	3	0	2	0	0.697423	NA	-0.167791	0.933247	1.64596	0.423257	0.780747	0.697976	not_expressed
AGAP000267	48	61	53	1	0	1	87	117	179	12	14	10	0.534488	0.114197	4.53184	1.64e-07	3.15247	4.43e-19	7.14982	6.41e-18	unbiased
AGAP000268	28	21	15	2	4	7	34	46	51	15	33	12	0.361105	0.484021	2.99164	2.35e-08	0.964704	0.0205626	3.59524	9.9e-12	unbiased
AGAP000269	46	88	80	394	272	283	95	132	187	58	122	42	0.242605	0.5456	-1.21937	3.05e-05	0.729042	0.0208148	-0.732931	0.0133586	Fe_RT_weak
AGAP000270	150	144	110	534	349	457	56	62	80	69	127	135	-1.685	9.22e-08	-1.03538	0.000309685	-0.973661	0.00189106	-0.324039	0.280426	Fe_Ubi_weak
AGAP000271	38	40	27	1031	501	508	28	52	66	30	87	22	-0.227414	0.626687	-2.97336	5.91e-23	-0.068804	0.876505	-2.81475	5.16e-20	Fe_RT_strong
AGAP000272	147	129	119	274	158	216	61	81	129	58	114	82	-1.2546	8.53e-07	-0.400512	0.107855	-0.136891	0.648677	0.717199	0.00195657	Fe_Car_weak
AGAP000273	316	526	406	371	218	344	274	529	794	510	919	442	-0.38651	0.227287	1.90857	6.72e-14	-0.472931	0.0892605	1.82215	1e-12	unbiased
AGAP000274	144	223	141	13	5	52	88	107	174	43	78	43	-1.11679	0.0880023	2.06038	0.00042392	0.93928	0.125539	4.11644	2.7e-13	unbiased
AGAP000275	122	136	76	13	2	17	168	246	336	86	245	61	0.484044	0.309787	4.38476	4e-23	0.826473	0.0387777	4.72719	1.18e-26	unbiased
AGAP000277	2	2	1	0	0	0	36	56	75	2	0	1	4.32923	5.25e-08	2.94579	0.0588362	5.38926	5.96e-10	4.00582	0.00652294	Ma_Car_specific
AGAP000278	490	203	236	4	1	1	1545	1658	1997	319	334	201	1.78479	8.61e-05	7.79219	8.47e-33	2.35617	2.47e-08	8.36357	1.35e-37	Ma_Car_weak
AGAP000279	1	0	0	0	0	0	1	2	0	0	0	0	0.787812	NA	0.34505	0.875936	2.44881	0.25946	2.00605	0.334658	not_expressed
AGAP000280	109	129	117	9	0	4	255	361	458	27	30	25	0.893158	0.000728299	3.56428	1.01e-13	3.44774	4.27e-36	6.11886	1.06e-41	unbiased
AGAP000281	61	104	85	167	103	134	148	264	327	69	129	40	0.843312	0.00688101	0.12195	0.709422	1.43944	3.48e-07	0.718083	0.0122435	unbiased
AGAP000283	19	22	25	2	3	7	51	65	71	34	37	21	0.813538	0.0713048	3.78469	1.17e-12	0.797004	0.0451644	3.76815	2.83e-12	unbiased
AGAP000284	14	19	10	17	31	31	13	22	24	515	731	311	-0.212874	0.756108	5.08868	1.43e-40	-4.88693	8.83e-35	0.414623	0.393929	Ma_RT_strong
AGAP000285	98	177	105	526	376	415	90	139	156	95	134	84	-0.64397	0.00704714	-1.13159	2.84e-08	0.0684008	0.80415	-0.419217	0.0434136	Fe_RT_weak
AGAP000286	13	20	17	54	25	36	12	10	27	7	15	6	-0.718763	0.18147	-1.08177	0.0194679	0.600644	0.265013	0.237632	0.604006	unbiased
AGAP000287	17	9	19	77	44	54	9	19	23	13	14	14	-0.568963	0.332305	-1.08267	0.0137328	0.0284074	0.965539	-0.485296	0.278569	unbiased
AGAP000288	49	59	34	303	168	225	27	31	45	19	29	21	-1.12482	7.62e-05	-2.36764	1.15e-20	0.360235	0.276016	-0.882583	8.28e-05	Fe_RT_strong
AGAP000289	30	33	24	160	98	127	53	50	48	32	39	29	0.171079	0.712788	-0.968986	0.00150637	0.406368	0.251556	-0.733697	0.0191086	unbiased
AGAP000290	82	95	87	4	0	10	72	143	130	21	38	8	-0.324978	0.546221	3.04231	6.67e-08	2.17668	5.79e-07	5.54397	1.75e-25	unbiased
AGAP000291	202	241	161	687	398	500	220	283	356	60	136	102	-0.158998	0.506472	-1.46164	1.73e-15	1.32208	2.75e-12	0.0194414	0.920463	unbiased
AGAP000292	266	273	201	256	156	194	268	494	379	119	261	88	-0.0497813	0.89472	0.498808	0.0499892	1.14727	2.84e-06	1.69586	8.08e-13	unbiased
AGAP000293	1	3	0	2	0	0	0	4	4	0	0	0	0.30122	NA	-1.09262	0.595911	3.35114	0.081297	1.9573	0.255983	not_expressed
AGAP000294	38	46	36	8	6	2	27	68	50	24	40	8	-0.426356	0.443575	2.98341	5.2e-08	0.826451	0.0811327	4.23621	1.21e-15	unbiased
AGAP000295	35	53	40	20	31	31	57	114	122	60	126	27	0.479165	0.38881	2.10167	1.79e-06	0.311642	0.531783	1.93415	1.47e-05	unbiased
AGAP000296	449	301	389	32	102	119	265	340	446	110	271	117	-0.830245	0.181237	1.64893	0.00157243	0.92183	0.0962093	3.401	1.67e-11	unbiased
AGAP000297	72	114	90	163	107	115	123	252	219	188	423	109	0.404054	0.317822	1.73035	2.53e-08	-0.402695	0.245921	0.9236	0.00434433	unbiased
AGAP000298	0	0	3	0	1	0	0	2	6	0	3	0	0.269414	NA	1.20494	0.544799	1.02581	0.624477	1.96134	0.298466	not_expressed
AGAP000299	31	46	33	54	34	41	13	17	17	23	54	32	-1.87982	1.25e-07	0.676013	0.024391	-1.38455	6.6e-05	1.17129	5.34e-05	Fe_Car_weak
AGAP000300	750	742	602	864	672	837	105	234	302	267	636	212	-2.44487	7.59e-18	-0.269002	0.371887	-0.975618	0.000827038	1.20025	1.19e-05	Fe_Car_strong
AGAP000301	103	73	58	3	40	34	5	11	21	4	33	9	-3.28981	0.000165656	-0.215243	0.819849	-0.395857	0.698375	2.67871	0.000663945	Fe_Car_specific
AGAP000303	5	7	16	4	3	8	15	13	23	2	3	5	0.125173	0.905046	0.37136	0.688643	2.0266	0.0103842	2.27278	0.00201251	not_expressed
AGAP000304	455	782	543	607	364	576	601	797	928	313	628	283	-0.274407	0.294088	0.555078	0.0094893	0.765597	0.000358695	1.59508	5.56e-15	unbiased
AGAP000305	1035	824	654	391	153	279	850	1191	1810	464	977	520	-0.0998504	0.777645	2.20062	2.27e-20	0.766511	0.00191438	3.06699	1.14e-38	unbiased
AGAP000306	123	136	62	2317	1360	1491	134	218	221	70	180	40	0.184229	0.682336	-3.29757	3.3e-27	0.878176	0.00852168	-2.60363	1.05e-17	Fe_RT_strong
AGAP000307	84	124	111	278	158	204	123	251	306	97	294	62	0.346546	0.462001	0.303616	0.43337	0.471407	0.232405	0.428477	0.254362	unbiased
AGAP000308	319	429	281	1514	893	1064	101	156	336	108	255	159	-1.52655	1.72e-07	-1.79987	3.51e-11	-0.0721299	0.844584	-0.345448	0.22749	Fe_Ubi_weak
AGAP000309	15	16	11	20	11	10	22	37	55	14	35	16	0.731239	0.108269	1.56859	0.000105931	0.60499	0.122337	1.44234	0.00069896	unbiased
AGAP000310	25	41	30	417	272	349	42	54	79	70	110	55	0.18307	0.61911	-1.21585	1.18e-08	-0.632667	0.0120436	-2.03159	2.47e-17	Fe_RT_weak
AGAP000311	27	50	30	434	104	139	67	97	97	48	57	36	0.632454	0.194407	-1.13659	0.00356227	0.650287	0.128104	-1.11876	0.00459583	Fe_RT_weak
AGAP000312	37	55	45	175	119	120	80	120	133	33	75	23	0.595961	0.0527589	-0.778361	0.00377868	1.18676	1.29e-05	-0.187558	0.513808	unbiased
AGAP000313	1951	1529	1364	1941	843	1264	2829	4445	4349	531	1026	716	0.566517	0.0233184	0.156523	0.521981	2.13911	3.56e-23	1.72912	8.82e-16	unbiased
AGAP000314	64	86	66	416	278	316	96	277	323	69	246	45	0.91677	0.0566376	-0.724508	0.0879254	0.828363	0.0587256	-0.812915	0.0540496	unbiased
AGAP000315	436	522	307	548	306	388	354	471	660	76	154	83	-0.440444	0.00707472	-1.05171	1.13e-10	2.04293	2.85e-37	1.43167	1.71e-23	unbiased
AGAP000316	44	65	30	201	157	164	19	51	49	25	61	16	-0.901369	0.0242316	-1.51085	7.35e-06	0.0530973	0.91324	-0.556382	0.100676	unbiased
AGAP000317	7	8	7	4	1	1	22	36	43	6	20	6	1.49094	0.00652996	3.15861	8.41e-06	1.48842	0.00185191	3.15609	1.31e-05	Ma_Car_weak
AGAP000319	80	112	90	675	363	430	94	177	214	80	176	43	0.0622363	0.894309	-1.41483	9.17e-07	0.539361	0.0920542	-0.93771	0.00125925	Fe_RT_weak
AGAP000320	600	843	641	1463	965	1303	686	1169	1477	519	935	467	-0.0347234	0.898142	-0.0515222	0.797078	0.574738	0.00123626	0.557939	0.00119017	unbiased
AGAP000321	250	291	233	374	79	138	295	438	517	315	634	256	-0.00243196	0.995985	2.04233	3.73e-10	-0.109743	0.791424	1.93502	3.23e-09	unbiased
AGAP000322	90	129	80	626	413	454	130	241	245	100	218	48	0.357795	0.366989	-1.18547	9e-05	0.616973	0.0605587	-0.926289	0.00244275	Fe_RT_weak
AGAP000323	53	44	12	1561	946	1034	14	27	31	52	104	58	-1.24813	0.00267581	-3.10325	7.49e-24	-1.76442	1.38e-06	-3.61954	3.3e-29	Fe_RT_strong
AGAP000324	38	29	12	312	166	186	3	15	21	10	21	17	-1.71543	0.000750173	-2.78846	2.21e-11	-0.571111	0.296275	-1.64413	3.81e-05	Fe_RT_strong
AGAP000325	281	279	169	1297	739	871	272	315	466	136	191	112	-0.134808	0.615122	-1.75628	6.63e-20	1.03907	2.55e-07	-0.582407	0.00243547	Fe_RT_weak
AGAP000326	71	71	50	176	112	139	24	29	31	13	21	25	-1.84541	4.36e-09	-1.8764	8.42e-10	0.2808	0.482874	0.24981	0.377949	Fe_Ubi_weak
AGAP000327	3628	4525	3151	142	28	325	1476	2138	2802	278	487	403	-1.4751	0.022848	2.16444	0.00016034	2.15534	0.000219854	5.79488	2.25e-25	Fe_Car_weak
AGAP000328	84	163	115	872	479	632	107	217	243	92	230	65	-0.060606	0.897305	-1.49173	2.76e-07	0.399929	0.228019	-1.0312	0.0004222	Fe_RT_weak
AGAP000329	11	10	3	1	0	1	38	68	90	2	8	1	2.32323	1.89e-05	2.88291	0.00476194	3.91487	7.81e-11	4.47455	2.41e-06	Ma_Car_specific
AGAP000330	62	60	29	485	284	325	39	41	60	55	100	62	-0.760374	0.0103925	-1.3838	4.54e-10	-0.826699	0.00170179	-1.45013	3.32e-10	Fe_RT_weak
AGAP000331	501	857	640	282	102	230	834	1880	2159	676	1780	448	0.547488	0.213736	3.0782	3.1e-18	0.602025	0.12119	3.13274	7.59e-19	unbiased
AGAP000332	265	355	249	2300	1673	1750	188	334	598	282	538	255	-0.37612	0.223106	-1.51847	3.43e-10	-0.186886	0.523404	-1.32924	4.38e-08	Fe_RT_weak
AGAP000334	65	93	72	192	95	117	149	208	222	79	134	61	0.661027	0.00318837	0.388679	0.0659775	0.895079	9.2e-06	0.622731	0.00273509	unbiased
AGAP000336	44	67	36	1018	604	621	47	111	102	40	91	25	0.135017	0.757527	-2.95206	9.85e-27	0.566426	0.0768145	-2.52065	7.39e-20	Fe_RT_strong
AGAP000337	128	156	127	411	306	395	86	135	204	111	193	111	-0.66726	0.00755326	-0.5128	0.0197847	-0.200492	0.437164	-0.0460315	0.846644	unbiased
AGAP000338	4	10	8	116	66	80	9	26	16	9	23	17	0.513275	0.421456	-1.46404	0.000167516	-0.153052	0.780538	-2.13037	1.84e-06	Fe_RT_weak
AGAP000339	50	69	45	467	254	264	51	96	119	59	91	61	0.00135201	0.996373	-1.24569	1.52e-09	0.0883077	0.753056	-1.15873	5.3e-08	Fe_RT_weak
AGAP000340	38	49	56	5	23	34	22	28	35	17	41	38	-1.42724	0.044638	1.38953	0.0303507	-0.386701	0.60176	2.43007	7.8e-05	Fe_Car_weak
AGAP000341	41	54	56	1	14	21	56	72	104	11	27	10	-0.0963912	0.916643	1.08053	0.120628	2.06864	0.00155305	3.24556	2.78e-07	unbiased
AGAP000342	16	32	25	8	4	10	69	78	115	9	11	6	1.16653	0.00302991	1.16637	0.0286285	3.09262	1.91e-13	3.09245	1.16e-11	Ma_Car_weak
AGAP000343	97	150	99	500	243	290	174	266	391	72	193	77	0.563383	0.0341241	-0.684703	0.00343964	1.10582	2.52e-06	-0.142269	0.577047	unbiased
AGAP000344	17	14	11	37	14	13	412	565	121	78	89	8	4.00642	2.58e-07	2.3459	0.00160712	2.52053	0.000623428	0.860007	0.284378	Ma_Car_strong
AGAP000345	4	9	8	0	0	0	183	260	75	25	34	0	3.85342	9.26e-05	6.24176	2.71e-06	2.97757	0.00110813	5.36592	6.9e-05	Ma_Car_specific
AGAP000346	67	67	57	212	82	99	100	195	210	47	87	49	0.686159	0.0157329	-0.110603	0.706235	1.23546	1.27e-06	0.4387	0.0940245	unbiased
AGAP000347	99	147	110	1	0	4	95	176	204	0	1	4	-0.289234	0.418691	0.902207	0.341979	6.13175	3.58e-21	7.32319	1.32e-30	unbiased
AGAP000348	112	172	187	1	0	0	225	462	688	1	2	2	0.754584	0.0968255	2.34867	0.0457946	7.58124	6.8e-28	9.17533	2.6e-21	unbiased
AGAP000349	42	89	68	243	122	153	72	132	175	32	96	27	0.210265	0.650268	-0.867212	0.0115193	1.13446	0.0011939	0.056982	0.876656	unbiased
AGAP000351	19	24	19	24	7	20	16	36	44	7	17	10	-0.0862515	0.889892	0.369777	0.456405	1.25404	0.00503613	1.71007	3.75e-05	unbiased
AGAP000352	1	3	3	7	1	4	1	2	3	19	75	17	-0.86178	0.488165	3.94282	1.19e-08	-4.12547	2.5e-07	0.679132	0.468239	Ma_RT_specific
AGAP000354	139	295	147	852	418	530	594	1086	896	195	480	128	1.50185	5.02e-06	-0.295955	0.376372	1.57113	4.14e-07	-0.226682	0.504883	Ma_Car_weak
AGAP000355	33	54	43	427	288	303	54	101	146	30	107	25	0.47538	0.29822	-1.83997	1.25e-07	0.762398	0.0470798	-1.55295	9.61e-06	Fe_RT_weak
AGAP000356	13	3	0	1	0	2	18	20	4	15	42	14	0.828278	0.519162	4.84802	9.1e-06	-0.680643	0.527691	3.3391	0.00339548	unbiased
AGAP000357	0	37	1	51	10	67	0	0	0	1	21	0	-5.04993	0.00500741	-1.70508	0.25449	-3.82686	0.0258014	-0.482019	0.758417	unbiased
AGAP000358	286	361	228	397	211	296	233	262	330	144	260	179	-0.731143	5.89e-05	0.327959	0.0675272	0.305532	0.104232	1.36463	1.3e-16	unbiased
AGAP000359	26	23	19	61	27	27	115	126	105	85	174	96	1.71314	1.64e-06	2.57143	1.94e-16	-0.159913	0.655576	0.698381	0.0572855	Ma_Ubi_weak
AGAP000360	22	24	29	25	16	15	28	73	108	1	11	2	0.676508	0.23015	-1.10421	0.0787744	3.62439	3.84e-10	1.84367	0.000138091	unbiased
AGAP000361	54	53	27	32	13	66	115	141	213	31	74	43	1.12856	0.0317737	1.29036	0.00721165	1.45881	0.00201921	1.6206	0.000629632	Ma_Car_weak
AGAP000363	106	176	156	14	6	8	397	794	1028	49	73	9	1.57101	0.00193279	3.05213	1.6e-08	3.83221	2.39e-16	5.31333	1.93e-24	Ma_Car_weak
AGAP000364	55	101	94	1	1	0	190	443	502	22	32	8	1.41639	0.000975925	5.16825	2.67e-09	3.9219	9.13e-21	7.67376	9.92e-20	Ma_Car_weak
AGAP000365	128	98	103	209	161	143	48	68	88	11	48	7	-1.39587	0.000934123	-2.1647	1.44e-07	1.53866	0.000407876	0.769833	0.0455896	Fe_Car_weak
AGAP000366	7	11	4	0	0	0	16	28	38	1	3	5	1.21563	0.0653501	4.24054	0.00226085	2.87514	2.28e-05	5.90005	8.92e-06	unbiased
AGAP000367	375	187	186	317	213	272	458	561	666	141	228	179	0.480641	0.226023	0.404204	0.243672	1.39163	2.23e-05	1.31519	4.32e-05	unbiased
AGAP000368	142	185	126	332	114	158	156	273	382	173	346	124	0.124978	0.754778	1.04724	0.000115779	0.140909	0.667352	1.06317	9.75e-05	unbiased
AGAP000369	1	1	0	1	3	2	1	0	9	1	3	1	1.33001	0.466311	0.422539	0.77852	0.655245	0.671313	-0.25223	0.870843	not_expressed
AGAP000372	58	66	57	599	373	452	92	122	154	58	173	35	0.331447	0.44996	-1.60595	4.76e-07	0.392268	0.289785	-1.54513	1.67e-06	Fe_RT_weak
AGAP000374	29	58	36	513	360	345	15	39	53	51	99	61	-0.904932	0.0109048	-1.60275	1.31e-09	-1.2193	8.15e-05	-1.91713	3.84e-12	Fe_RT_weak
AGAP000375	769	721	556	685	378	542	1473	1954	2448	329	557	377	0.837368	4.95e-07	0.614702	0.000177616	1.99692	1.68e-37	1.77425	1.35e-29	unbiased
AGAP000376	359	518	562	302	73	342	284	460	564	305	416	126	-0.864919	0.128637	1.193	0.0143402	0.412364	0.454839	2.47028	1.47e-07	unbiased
AGAP000377	14	21	30	0	8	8	11	17	16	31	29	15	-1.25344	0.122523	2.93642	4.28e-05	-0.990917	0.183586	3.19895	7.75e-06	unbiased
AGAP000378	209	459	259	2108	1066	1331	198	334	467	438	856	342	-0.577213	0.0516134	-0.538689	0.0357726	-0.906091	0.000489133	-0.867567	0.000557597	unbiased
AGAP000379	0	2	0	3	5	3	1	4	4	7	9	7	1.28459	0.38834	1.90385	0.0179215	-1.57422	0.0743845	-0.954956	0.434446	not_expressed
AGAP000380	420	533	421	425	229	373	321	723	915	340	665	223	-0.235967	0.520736	1.13771	3.82e-05	0.462564	0.122481	1.83624	1.29e-11	unbiased
AGAP000382	5	2	0	0	1	0	6	8	6	0	1	0	0.88214	0.537062	0.627511	0.732028	3.62013	0.0121378	3.36551	0.0156453	unbiased
AGAP000383	1	6	3	1	0	0	3	7	16	5	8	0	0.621115	0.644523	3.71059	0.00453898	0.746085	0.500896	3.83556	0.00340328	not_expressed
AGAP000384	83	137	101	905	609	662	119	229	325	62	175	46	0.334905	0.41005	-2.11116	4.89e-12	1.0911	0.000758678	-1.35496	9.04e-06	Fe_RT_weak
AGAP000385	235	193	164	1981	128	224	291	461	458	213	411	196	0.329271	0.719135	-0.290352	0.688638	0.377546	0.619219	-0.242077	0.735649	unbiased
AGAP000386	29	30	27	298	213	182	32	76	113	15	52	14	0.593244	0.211165	-2.25134	2.14e-09	1.25844	0.00185386	-1.58615	2.04e-05	Fe_RT_weak
AGAP000387	11	22	17	88	50	45	19	22	43	31	52	16	0.0501796	0.937392	0.0360692	0.930902	-0.424333	0.34055	-0.438443	0.300011	unbiased
AGAP000388	13	13	3	1	5	6	10	10	13	110	169	91	-0.439755	0.518358	5.7329	3.23e-28	-3.64866	1.16e-17	2.524	2.05e-05	Ma_RT_specific
AGAP000389	24	55	33	1	4	3	64	202	242	29	46	10	1.41801	0.010366	4.03966	1.79e-09	2.30116	5.18e-06	4.92281	9.86e-14	Ma_Car_specific
AGAP000390	33	44	48	0	13	13	16	30	32	10	60	9	-1.36512	0.14517	1.99396	0.0157309	-0.0160369	0.986745	3.34305	2.56e-05	unbiased
AGAP000391	33	66	64	203	66	70	53	77	141	45	100	38	-0.0138445	0.981494	0.0905065	0.846439	0.367971	0.434201	0.472322	0.270197	unbiased
AGAP000392	74	102	94	373	229	263	128	200	217	117	160	63	0.313559	0.341791	-0.409786	0.120361	0.472986	0.0856296	-0.250359	0.35698	unbiased
AGAP000393	322	350	329	214	103	115	501	812	1232	261	550	235	0.599321	0.0207843	2.19506	2.94e-21	1.07655	2.91e-06	2.6723	5.42e-31	unbiased
AGAP000394	70	98	88	710	489	587	38	53	111	61	103	77	-1.07578	0.00100452	-1.93812	2.64e-12	-0.525646	0.106381	-1.38799	5.49e-07	Fe_RT_weak
AGAP000395	28	40	25	171	91	108	21	18	43	26	38	33	-0.852444	0.0284397	-0.936307	0.0023217	-0.485904	0.193491	-0.569767	0.0707039	unbiased
AGAP000396	326	404	258	597	351	425	205	257	457	109	206	179	-0.796865	0.00240061	-0.499198	0.0443877	0.630502	0.0132979	0.928169	7.55e-05	unbiased
AGAP000397	98	77	61	841	650	641	30	40	67	33	71	42	-1.48362	1.01e-06	-2.96027	2.13e-29	-0.302041	0.375843	-1.77869	2.02e-12	Fe_RT_strong
AGAP000398	20	28	11	133	84	96	7	13	18	11	19	20	-1.28978	0.00503856	-1.67027	1.74e-06	-0.640021	0.165246	-1.02052	0.00309627	Fe_RT_weak
AGAP000399	284	572	242	4225	2528	2517	206	406	487	197	501	163	-0.661765	0.0466329	-2.55802	3.66e-20	0.194265	0.569755	-1.70199	1.03e-09	Fe_RT_strong
AGAP000400	160	236	139	735	471	566	120	230	321	120	274	104	-0.380349	0.175372	-0.956015	2.37e-05	0.234697	0.375913	-0.340969	0.146971	unbiased
AGAP000401	5	8	6	2	1	2	1	8	15	3	1	0	-0.438009	0.712639	0.634671	0.608677	2.04697	0.0535011	3.11965	0.00119017	unbiased
AGAP000402	64	83	49	222	130	163	27	42	76	33	44	27	-1.12866	9.01e-05	-1.34326	3.03e-07	0.222856	0.506323	0.00826061	0.976501	Fe_Ubi_weak
AGAP000403	297	372	233	4140	2355	2649	237	455	653	147	386	117	-0.145551	0.697198	-2.94638	3.1e-31	0.879575	0.00122666	-1.92126	2.96e-14	Fe_RT_strong
AGAP000405	76	69	68	619	343	362	30	39	57	62	121	48	-1.45541	2.01e-07	-1.59119	3.68e-12	-1.04795	0.000116503	-1.18373	2.77e-07	Fe_RT_weak
AGAP000406	95	130	91	1388	814	895	110	222	269	121	366	96	0.208392	0.611858	-1.57718	3.17e-08	-0.0808805	0.831534	-1.86645	9.16e-11	Fe_RT_weak
AGAP000407	258	312	228	893	670	815	288	315	549	132	220	155	-0.15669	0.599358	-1.29882	2.08e-09	0.948958	2.65e-05	-0.193175	0.404761	unbiased
AGAP000408	0	0	0	0	0	0	0	0	0	0	0	0	NA	NA	NA	NA	NA	NA	NA	NA	not_expressed
AGAP000410	82	181	104	727	436	492	107	346	386	65	255	49	0.450289	0.432971	-1.38392	0.0017012	1.05917	0.0224095	-0.775035	0.0851852	unbiased
AGAP000411	0	0	0	0	0	0	4	2	5	0	1	0	4.26873	NA	1.9162	0.346093	3.04787	0.0806043	0.695342	0.751767	not_expressed
AGAP000412	135	258	149	593	333	454	190	295	428	138	233	117	0.0661904	0.839325	-0.561326	0.00927254	0.674849	0.00234973	0.0473322	0.839573	unbiased
AGAP000413	3	3	3	0	0	1	116	175	220	1	2	4	5.10308	2.96e-19	2.93404	0.0118178	5.88717	9.19e-23	3.71814	0.000944138	Ma_Car_specific
AGAP000414	68	69	40	1350	859	942	27	28	37	14	73	17	-1.57322	0.000107992	-4.09646	1.33e-31	-0.217351	0.645668	-2.74059	3.61e-16	Fe_RT_strong
AGAP000415	106	90	79	84	47	82	71	75	113	53	69	124	-0.761327	0.131891	1.25353	0.00345357	-0.239592	0.636523	1.77526	2.38e-05	unbiased
AGAP000416	372	493	389	305	192	282	102	138	233	94	140	164	-2.11077	8.51e-12	0.0336581	0.922127	-0.0620496	0.880055	2.08238	9.78e-13	Fe_Car_weak
AGAP000417	0	0	0	0	0	0	0	11	7	21	48	8	4.13432	0.0238026	7.23864	1.03e-06	-2.20625	0.0251782	0.898069	0.666521	Ma_RT_specific
AGAP000418	120	133	139	3	1	2	591	1285	876	34	86	13	2.07328	3.84e-06	4.9959	1.47e-13	4.23874	5.32e-23	7.16136	2.49e-27	Ma_Car_weak
AGAP000419	111	117	166	10	5	16	438	1124	767	35	102	10	1.76369	0.00362993	2.90373	1.68e-06	3.85353	2.96e-12	4.99357	1.88e-17	Ma_Car_weak
AGAP000420	255	148	195	1	68	56	63	106	112	5	45	5	-1.73397	0.108982	-0.737798	0.470398	2.26823	0.0206306	3.2644	0.000337178	unbiased
AGAP000421	0	1	1	0	0	1	2	3	1	117	138	86	0.751055	0.624103	8.57194	3.94e-16	-5.97706	1.03e-18	1.84382	0.194269	Ma_RT_specific
AGAP000422	1	4	2	3	1	2	1	10	7	5	15	5	0.614954	0.605821	2.78562	0.00142275	-0.646779	0.459049	1.52389	0.129164	not_expressed
AGAP000423	0	0	0	0	0	0	1	2	5	3	3	2	3.51655	NA	4.5973	0.00586715	-0.291833	0.84607	0.788911	0.717838	not_expressed
AGAP000424	1	1	0	0	0	1	4	3	2	4	16	2	1.42972	0.378083	4.39286	0.000701643	-1.18151	0.285868	1.78162	0.254547	unbiased
AGAP000425	98	145	111	295	152	238	308	260	183	122	209	201	0.525461	0.282914	0.632706	0.118772	0.36495	0.412481	0.472195	0.250696	unbiased
AGAP000426	98	143	94	352	196	197	54	91	105	72	131	99	-1.10144	1.76e-06	-0.329565	0.125141	-0.504409	0.030513	0.267469	0.20999	unbiased
AGAP000427	174	245	0	5664	5015	5687	0	8	9	4	244	5	-4.0084	0.0209704	-4.715	0.00204592	-2.77726	0.091824	-3.48387	0.0237485	Fe_RT_strong
AGAP000428	52	74	62	274	164	198	82	114	132	60	126	75	0.122649	0.678072	-0.35318	0.0773022	0.136744	0.566287	-0.339085	0.101373	unbiased
AGAP000429	52	90	67	343	241	242	63	75	122	38	68	44	-0.369251	0.244773	-1.52714	8.35e-10	0.571882	0.0423928	-0.586009	0.0174312	Fe_RT_weak
AGAP000430	27	37	25	2	1	2	91	132	254	20	21	9	1.68807	2.1e-05	4.03141	8.04e-09	2.95373	5.28e-14	5.29708	6.41e-15	Ma_Car_weak
AGAP000431	7	3	0	1	0	0	2	3	4	1	1	0	-0.745052	0.63532	1.46369	0.378099	1.71345	0.245686	3.92219	0.00527387	not_expressed
AGAP000432	58	52	30	200	124	108	60	92	109	29	56	30	0.219951	0.534038	-0.969652	0.000251773	0.97582	0.00045649	-0.213783	0.441274	unbiased
AGAP000433	122	173	137	544	293	386	273	488	477	176	323	99	0.820697	0.00342149	-0.132096	0.642491	0.883812	0.000596055	-0.0689811	0.806575	unbiased
AGAP000434	157	200	147	1596	831	1035	100	176	239	145	296	114	-0.67894	0.00263357	-1.72178	9.1e-20	-0.300445	0.181088	-1.34329	1.68e-12	Fe_RT_weak
AGAP000436	64	104	77	428	214	222	81	145	199	57	156	50	0.077636	0.864382	-0.823626	0.00424637	0.530063	0.0899684	-0.371198	0.214121	unbiased
AGAP000437	0	0	1	0	0	0	4	5	2	0	0	0	2.57553	NA	0.480518	0.831468	4.46058	0.0174466	2.36557	0.232176	not_expressed
AGAP000438	44	53	37	310	172	205	34	44	75	26	58	33	-0.49771	0.100269	-1.611	5.13e-12	0.178594	0.563763	-0.934698	4.68e-05	Fe_RT_weak
AGAP000439	207	321	134	2604	1438	1818	179	161	196	119	175	113	-0.87744	0.00192613	-2.86214	3.49e-31	0.22419	0.458943	-1.76051	5.74e-13	Fe_RT_strong
AGAP000440	291	477	357	403	221	346	411	645	1023	278	498	159	0.161195	0.694071	0.834971	0.00445345	0.948872	0.00139061	1.62265	1.16e-08	unbiased
AGAP000441	20	45	33	207	149	146	28	51	84	22	56	15	0.00789404	0.988297	-1.57729	2.01e-05	0.624315	0.137655	-0.960873	0.00955931	Fe_RT_weak
AGAP000442	7	14	10	1	1	1	21	71	88	4	4	3	1.76204	0.00254583	2.52728	0.00812573	3.64195	6.78e-09	4.40718	4.03e-07	Ma_Car_weak
AGAP000443	32	80	73	4	6	2	93	339	456	20	27	11	1.43246	0.0121605	3.03075	3.68e-06	3.55749	1.63e-11	5.15577	1.5e-16	Ma_Car_weak
AGAP000444	155	137	113	529	315	356	93	148	165	84	161	133	-0.691186	0.00616646	-0.69866	0.00149757	-0.131284	0.629892	-0.138758	0.563212	unbiased
AGAP000445	10	13	15	0	0	0	19	32	41	2	2	1	0.555773	0.364103	3.42806	0.017297	3.86726	2.72e-07	6.73954	2.16e-07	unbiased
AGAP000446	13	19	23	27	8	12	26	77	106	3	6	1	1.11318	0.0518436	-1.18806	0.0877146	4.01435	3.05e-10	1.71311	0.00124069	unbiased
AGAP000447	88	97	66	228	160	197	21	45	94	31	65	58	-1.39637	0.000434431	-0.975438	0.00714966	-0.256581	0.560562	0.164347	0.676307	unbiased
AGAP000448	84	60	35	227	129	184	27	31	35	22	46	31	-1.58615	7.49e-06	-1.4979	2.2e-06	-0.271927	0.505325	-0.183677	0.582755	Fe_Ubi_weak
AGAP000449	75	106	93	107	59	61	166	395	500	30	109	23	1.18128	0.00435242	0.325236	0.450092	2.5577	1.64e-11	1.70166	7.27e-06	Ma_Car_weak
AGAP000452	115	118	94	490	295	336	132	202	267	90	170	59	0.174052	0.548148	-0.908846	1.71e-05	0.728232	0.00110532	-0.354667	0.1035	unbiased
AGAP000453	84	161	121	631	393	416	150	339	437	129	357	87	0.592275	0.168242	-0.509058	0.167617	0.541656	0.160536	-0.559677	0.126031	unbiased
AGAP000454	238	246	209	302	205	248	127	172	330	95	176	117	-0.871965	0.00104144	-0.0307582	0.912588	0.44131	0.101388	1.28252	7.09e-08	unbiased
AGAP000456	59	100	77	388	212	222	115	261	268	91	219	42	0.718244	0.105637	-0.377826	0.342928	0.734553	0.0645766	-0.361517	0.363683	unbiased
AGAP000457	202	238	147	398	260	313	387	562	588	208	356	280	0.728278	0.000166331	0.753052	2.19e-05	0.639876	0.000381739	0.66465	0.000238815	unbiased
AGAP000458	2	8	12	8	2	3	12	24	36	3	3	0	0.909482	0.2943	-0.0768298	0.939227	3.18121	0.000185166	2.1949	0.00487615	unbiased
AGAP000459	0	2	0	2	0	0	2	6	4	2	1	1	1.77336	NA	1.78801	0.218644	1.18651	0.382878	1.20117	0.45175	unbiased
AGAP000460	7	25	14	0	0	0	23	83	90	2	9	0	1.33367	0.0754042	4.18478	0.00228176	3.88999	2.49e-07	6.7411	2.01e-07	unbiased
AGAP000461	140	204	176	263	167	166	368	913	1153	77	186	38	1.44705	0.000286418	-0.158237	0.714525	2.82401	1.87e-14	1.21872	0.00105888	Ma_Car_weak
AGAP000462	2023	2667	1582	11342	6031	7522	1361	1957	2600	1140	2424	979	-0.757576	4.12e-06	-1.54753	8.6e-25	0.215214	0.211844	-0.574741	0.00018084	Fe_RT_weak
AGAP000463	148	223	122	1461	1015	899	117	179	268	104	260	75	-0.489274	0.149237	-2.09709	9.78e-15	0.214272	0.518711	-1.39354	2.71e-07	Fe_RT_weak
AGAP000466	17	33	26	176	72	105	33	81	113	30	67	12	0.816041	0.122351	-0.79433	0.0749227	0.86788	0.0621739	-0.742491	0.100244	unbiased
AGAP000467	196	293	206	511	314	382	225	392	513	151	354	137	-0.0066575	0.982521	-0.033818	0.885588	0.634852	0.00310476	0.607691	0.00322455	unbiased
AGAP000468	78	126	7	445	39	670	65	101	92	87	1979	105	-0.215546	0.902445	1.37616	0.247345	-2.60544	0.0279081	-1.01374	0.399102	unbiased
AGAP000469	31	50	35	373	203	234	48	87	99	60	117	50	0.321538	0.294692	-0.903871	1.17e-05	-0.151363	0.56823	-1.37677	8.46e-10	unbiased
AGAP000470	261	341	210	447	255	344	282	399	534	126	223	108	-0.095828	0.63346	-0.263322	0.101062	1.20578	1.27e-15	1.03828	3.7e-13	unbiased
AGAP000471	84	133	82	232	110	179	87	113	212	126	236	129	-0.233454	0.473466	0.860225	0.000307868	-0.478089	0.063939	0.61559	0.0126482	unbiased
AGAP000472	102	255	165	79	74	90	401	910	1010	149	419	99	1.42491	0.00105441	2.18404	5.55e-08	1.65432	4.15e-05	2.41346	1.69e-09	Ma_Car_weak
AGAP000473	31	20	16	433	277	286	9	21	30	0	4	0	-0.87662	0.0593977	-6.77048	1.1e-21	3.42819	6.12e-06	-2.46567	6.42e-13	Fe_RT_specific
AGAP000474	27	24	7	514	390	380	4	8	15	14	18	7	-1.75226	0.000955063	-4.09041	5.44e-24	-0.753744	0.173722	-3.09189	8e-16	Fe_RT_specific
AGAP000475	73	96	66	311	169	254	78	116	140	60	103	51	-0.171871	0.518358	-0.839188	1.15e-05	0.438359	0.0415125	-0.228959	0.250015	unbiased
AGAP000476	47	35	32	7	4	9	52	94	111	8	18	8	0.453796	0.251591	1.64486	0.000992048	2.68769	2.09e-12	3.87875	5.61e-19	unbiased
AGAP000477	10	6	6	0	0	0	20	28	48	2	3	2	1.40018	0.0238383	3.88435	0.0059304	3.47124	8.36e-07	5.95541	7.1e-06	Ma_Car_specific
AGAP000478	9	15	16	143	62	77	16	26	26	16	26	11	0.0737704	0.905548	-1.43051	3.88e-05	0.162415	0.733397	-1.34186	0.000230526	Fe_RT_weak
AGAP000479	126	70	54	511	333	359	13	19	33	12	51	38	-2.63036	1.39e-08	-2.64163	2.39e-10	-0.830819	0.0955418	-0.84209	0.0426791	Fe_RT_strong
AGAP000480	61	81	33	591	346	396	43	42	65	49	68	84	-0.840297	0.034527	-1.69451	1.07e-07	-0.684371	0.0624153	-1.53859	1.8e-06	Fe_RT_weak
AGAP000481	49	95	43	10	11	11	59	112	164	33	14	16	0.150165	0.831094	1.96542	0.000267001	1.9786	5.61e-05	3.79386	8.58e-14	unbiased
AGAP000482	69	83	54	431	264	296	63	85	81	56	88	68	-0.501793	0.049663	-1.2605	2.1e-10	-0.0991568	0.71441	-0.857859	1.88e-05	Fe_RT_weak
AGAP000483	122	136	104	557	242	277	128	223	296	64	155	53	0.120055	0.742983	-1.05497	2.87e-05	1.0723	3.8e-05	-0.102723	0.713723	unbiased
AGAP000484	1	4	5	0	0	0	4	11	8	0	0	0	0.485369	0.717677	0.588956	0.787601	5.1146	0.0019432	5.21819	0.000816098	not_expressed
AGAP000485	1	1	2	0	0	0	5	7	7	0	0	0	1.55689	0.249764	0.561784	0.799807	5.05553	0.00293441	4.06042	0.0151636	not_expressed
AGAP000488	10	5	8	0	0	1	8	19	28	1	1	0	0.478779	0.590008	1.41646	0.341914	4.19491	7.71e-05	5.13259	8.15e-06	not_expressed
AGAP000489	88	97	53	993	508	552	61	164	199	39	106	26	0.102319	0.848208	-2.69845	1.33e-15	1.12748	0.00190814	-1.67329	5.17e-07	Fe_RT_strong
AGAP000491	92	180	123	114	45	83	108	118	192	66	87	108	-0.582531	0.166684	1.16519	0.00117784	0.384408	0.334029	2.13212	8.02e-10	unbiased
AGAP000492	19	46	37	36	28	43	26	77	111	24	54	13	0.29203	0.659486	0.575423	0.269899	1.00643	0.0488039	1.28982	0.0081098	unbiased
AGAP000493	68	76	65	0	0	1	374	500	518	60	71	37	2.06274	1.11e-15	7.12852	7.05e-15	2.83577	4.19e-29	7.90155	4.25e-18	Ma_Car_weak
AGAP000494	23	48	29	2	0	0	129	199	198	21	25	11	1.73421	1.29e-07	5.17461	1.42e-09	2.98345	4.13e-19	6.42386	1.98e-14	Ma_Car_weak
AGAP000495	5	4	0	192	98	140	2	5	1	7	10	12	-0.778444	0.444198	-2.86693	1.31e-10	-2.00771	0.00382526	-4.09619	3.83e-12	Fe_RT_strong
AGAP000496	93	59	31	1139	552	633	25	51	47	85	128	128	-1.24525	0.00327985	-1.71858	7.29e-07	-1.73666	4.53e-06	-2.21	3.41e-10	Fe_RT_weak
AGAP000497	18	18	7	194	107	130	9	16	32	15	14	14	-0.292743	0.626158	-2.29913	2.2e-09	0.100319	0.860341	-1.90607	8.47e-07	Fe_RT_weak
AGAP000498	202	254	174	726	408	459	278	432	416	184	312	230	0.170911	0.416802	-0.160992	0.345527	0.414213	0.0137037	0.0823099	0.645555	unbiased
AGAP000499	22	51	28	337	178	245	46	67	103	18	49	14	0.413991	0.308987	-2.32738	1.27e-13	1.24096	0.000265765	-1.50041	8.89e-07	Fe_RT_strong
AGAP000500	1159	1073	851	983	594	923	1104	1736	2007	545	1121	445	-0.0476741	0.882494	0.633443	0.00210481	1.03065	4.61e-07	1.71176	6.02e-18	unbiased
AGAP000501	107	113	65	968	593	714	87	97	98	76	157	107	-0.643766	0.0151697	-1.80014	1.43e-17	-0.438502	0.0786744	-1.59488	8.78e-14	Fe_RT_weak
AGAP000502	13	24	23	2	3	2	22	47	71	8	17	7	0.468113	0.410393	2.93602	1.86e-05	1.872	0.000112048	4.3399	2.74e-11	unbiased
AGAP000504	240	384	259	1093	738	724	279	667	892	329	810	206	0.311073	0.481747	-0.105716	0.784703	0.278001	0.472281	-0.138788	0.71297	unbiased
AGAP000506	22	30	20	2	1	0	23	22	55	0	0	1	-0.21863	0.749897	-0.178793	0.902683	5.64215	3.8e-07	5.68199	1.54e-11	unbiased
AGAP000507	11	15	12	145	57	66	18	11	29	5	27	9	-0.0561452	0.942105	-1.77695	0.000172047	0.399255	0.496846	-1.32155	0.00542094	Fe_RT_specific
AGAP000508	84	78	51	241	154	169	74	76	67	36	50	43	-0.585178	0.0965551	-1.14683	0.000122377	0.560401	0.0931111	-0.00124914	0.99709	unbiased
AGAP000509	5	8	11	5	3	0	18	58	55	8	36	6	1.6286	0.028221	3.27195	2.21e-05	1.26006	0.0578134	2.90341	0.000256982	unbiased
AGAP000512	51	97	67	171	57	73	76	174	226	32	100	12	0.405121	0.524669	-0.200195	0.720213	1.59689	0.00136772	0.991577	0.0428981	unbiased
AGAP000513	145	156	112	974	651	804	203	221	136	31	117	36	-0.141122	0.800366	-2.89274	7.43e-15	1.60235	3.99e-05	-1.14927	0.00188533	Fe_RT_strong
AGAP000514	93	149	87	549	490	530	28	39	46	47	88	68	-2.18817	7.72e-14	-2.03933	1.45e-15	-1.05912	0.000469321	-0.910272	0.000298532	Fe_RT_weak
AGAP000515	25	41	16	402	197	207	20	30	38	9	34	18	-0.548785	0.19513	-2.76998	4.8e-18	0.349045	0.400473	-1.87215	9.01e-10	Fe_RT_strong
AGAP000516	30	59	37	315	166	189	30	35	59	12	43	20	-0.692447	0.0594759	-2.23281	3.46e-13	0.553585	0.131023	-0.986776	0.000667802	Fe_RT_weak
AGAP000519	33	61	48	98	55	81	39	174	202	39	148	32	0.742717	0.216687	0.674245	0.190837	0.756724	0.15373	0.688252	0.181273	unbiased
AGAP000520	62	63	68	20	13	19	185	282	321	122	210	107	1.32197	9.33e-09	3.98072	2.66e-46	0.641502	0.00271485	3.30026	5.89e-30	Ma_Car_weak
AGAP000521	86	99	64	5	2	9	93	172	200	78	134	86	0.204927	0.479461	5.08434	2.38e-36	0.404004	0.0824618	5.28342	8.03e-39	unbiased
AGAP000522	15	20	11	1	1	1	38	73	72	8	15	2	1.30741	0.00362478	3.60282	1.75e-05	2.66975	4.19e-09	4.96516	6.76e-10	Ma_Car_weak
AGAP000523	8461	9760	7218	5425	2818	4001	20299	29555	24133	1921	4424	1181	0.888251	0.0039172	0.153706	0.624682	3.20941	1.63e-32	2.47486	6.04e-20	unbiased
AGAP000526	374	650	388	2851	1813	2143	797	1205	968	495	996	331	0.442877	0.148645	-1.02873	4.44e-05	0.590121	0.0280437	-0.881482	0.000493153	Fe_RT_weak
AGAP000528	1100	1541	1205	299	208	378	997	1873	2639	505	1281	429	-0.220054	0.593403	2.12507	1.69e-12	1.1389	0.000243238	3.48403	9.04e-32	unbiased
AGAP000529	109	114	83	230	173	148	100	163	195	62	145	76	-0.112539	0.721697	-0.0681544	0.789209	0.500743	0.0329811	0.545128	0.012857	unbiased
AGAP000530	39	30	12	513	287	305	14	17	27	19	31	19	-1.13846	0.00602918	-3.02341	1.43e-21	-0.462978	0.27509	-2.34793	3.81e-14	Fe_RT_strong
AGAP000531	25	24	20	219	114	122	18	18	19	17	28	19	-0.980801	0.0132544	-1.84943	4.44e-10	-0.406586	0.310731	-1.27521	1.37e-05	Fe_RT_weak
AGAP000532	154	208	154	786	519	691	265	432	532	111	280	81	0.549025	0.0587245	-1.24282	4.94e-07	1.23912	9.72e-07	-0.55273	0.028434	Fe_RT_weak
AGAP000533	42	86	55	87	60	78	40	88	164	25	96	23	-0.0781084	0.907246	0.131495	0.79671	0.855631	0.0683637	1.06523	0.0151451	unbiased
AGAP000534	260	312	268	386	316	313	200	322	477	155	283	164	-0.478454	0.057574	0.144165	0.553133	0.491376	0.0349327	1.11399	1.71e-07	unbiased
AGAP000535	93	307	163	2	107	232	20	38	86	1	2	4	-2.54039	0.0214873	-4.31736	3.85e-05	3.55286	0.00109492	1.77589	0.0740692	Fe_Ubi_weak
AGAP000536	71	61	38	69	44	62	58	84	116	38	69	38	-0.0853998	0.828075	0.650949	0.0186255	0.615893	0.0271172	1.35224	2.48e-07	unbiased
AGAP000537	0	0	0	0	0	0	3	0	0	1	2	0	2.32588	NA	2.55809	0.214157	0.24408	0.924115	0.476285	0.825362	not_expressed
AGAP000538	0	0	1	0	0	0	0	0	0	0	0	0	-1.68859	NA	0.276093	NA	-0.0698007	NA	1.89489	NA	not_expressed
AGAP000539	0	1	1	2	2	0	0	2	1	3	7	4	-0.132482	0.949627	2.5096	0.0245091	-2.25327	0.0680647	0.388812	0.792202	not_expressed
AGAP000540	6	4	4	1	4	5	4	9	11	187	280	165	0.0726344	0.93311	6.80435	5.76e-41	-4.92261	2.73e-35	1.8091	0.00566839	Ma_RT_specific
AGAP000541	2735	2885	1960	5264	3092	4286	1046	1206	1587	805	1564	1163	-1.63552	9.72e-18	-0.88424	2.38e-06	-0.0826214	0.726072	0.668658	0.000361327	Fe_Car_weak
AGAP000542	0	0	0	0	0	0	0	0	0	0	0	0	NA	NA	NA	NA	NA	NA	NA	NA	not_expressed
AGAP000543	31	55	43	90	64	84	28	39	71	26	31	26	-0.610329	0.128764	-0.554772	0.117128	0.449059	0.249416	0.504617	0.133589	unbiased
AGAP000544	62	73	51	392	248	272	69	123	176	77	133	45	0.268083	0.438421	-0.933417	0.000192278	0.317504	0.272916	-0.883995	0.000542823	unbiased
AGAP000545	574	449	414	314	192	286	205	326	650	115	234	114	-1.049	0.00111164	0.125139	0.717656	1.09968	0.000352152	2.27382	3.48e-15	Fe_Car_weak
AGAP000546	338	293	146	3520	2121	2390	278	334	425	173	380	284	-0.225091	0.541779	-2.30364	2.77e-18	0.111889	0.743244	-1.96666	1.16e-13	Fe_RT_strong
AGAP000547	97	122	99	391	280	294	67	105	155	48	115	80	-0.671382	0.01543	-1.07307	6.91e-06	0.200687	0.491825	-0.200997	0.426483	unbiased
AGAP000548	676	460	396	2	0	0	0	0	0	1	1	0	-11.588	7.82e-17	0.851466	0.540165	-1.8396	0.297189	10.5999	3.33e-31	Fe_Car_specific
AGAP000549	227	328	243	308	203	286	55	79	127	41	108	48	-2.3094	3.1e-21	-1.13673	4.7e-06	0.220841	0.468169	1.39351	7.14e-10	Fe_Car_strong
AGAP000550	810	571	765	27	257	237	351	584	613	94	465	50	-1.17038	0.20816	0.64407	0.437443	1.33207	0.104826	3.14652	2.84e-05	unbiased
AGAP000551	74	101	63	108	89	152	63	77	93	27	75	29	-0.677938	0.0669897	-0.581749	0.0854741	0.698302	0.047611	0.794491	0.01153	unbiased
AGAP000552	79	125	112	228	113	167	85	134	194	41	83	21	-0.337973	0.398962	-0.906656	0.00551685	1.32811	5.72e-05	0.759429	0.0145477	unbiased
AGAP000553	59	68	34	1000	578	591	12	25	43	131	336	101	-1.69763	8.5e-06	-1.07092	0.000371879	-2.96238	2.07e-18	-2.33567	4.51e-14	Fe_RT_weak
AGAP000554	53	81	61	259	208	211	42	33	69	29	54	25	-1.09909	0.00122349	-1.75472	6.55e-09	0.236973	0.537064	-0.418662	0.165966	Fe_Ubi_weak
AGAP000555	109	98	93	107	62	79	53	99	191	46	67	44	-0.577666	0.117734	0.304414	0.386345	0.82114	0.0148931	1.70322	3.3e-08	unbiased
AGAP000556	18	15	12	71	37	48	11	10	14	3	11	12	-1.01479	0.0585799	-1.5985	0.000357662	0.225121	0.713454	-0.358593	0.409969	unbiased
AGAP000558	74	139	97	658	419	410	172	326	478	160	315	74	0.918012	0.023384	-0.577102	0.114849	0.644117	0.0892425	-0.850996	0.0177384	unbiased
AGAP000559	12	18	8	303	220	237	17	13	26	16	35	23	-0.0940831	0.882945	-2.43777	5.79e-16	-0.587645	0.138809	-2.93134	1.03e-17	Fe_RT_strong
AGAP000560	233	270	221	325	186	249	342	424	478	107	219	142	0.114184	0.632097	0.24025	0.210912	1.22721	3.21e-12	1.35327	3.37e-15	unbiased
AGAP000561	213	382	216	1696	877	1029	412	780	914	222	507	129	0.684611	0.0429964	-1.19524	4.03e-05	1.14461	0.000129483	-0.735243	0.0128087	Fe_RT_weak
AGAP000562	565	868	468	4384	2720	3174	634	1360	1388	969	2843	512	0.142119	0.794689	-0.468319	0.222775	-0.434626	0.28658	-1.04506	0.00418855	unbiased
AGAP000563	97	137	87	382	254	314	103	185	273	126	258	152	0.0941825	0.76884	0.0877319	0.710289	-0.170248	0.488231	-0.176699	0.441901	unbiased
AGAP000564	19	32	27	126	71	74	17	29	35	11	33	16	-0.635938	0.115233	-1.24644	0.000118758	0.244797	0.557825	-0.365702	0.259643	unbiased
AGAP000565	711	825	535	2889	1894	2205	841	1093	1350	857	1505	932	0.00101274	0.99561	-0.151686	0.225552	-0.207802	0.108808	-0.360501	0.00268082	unbiased
AGAP000566	45	40	31	518	320	389	37	66	101	19	58	18	0.0893722	0.85057	-2.81036	5.02e-22	0.919359	0.00500398	-1.98037	2.43e-12	Fe_RT_strong
AGAP000567	178	283	170	1020	596	717	186	389	535	165	372	115	0.0938554	0.820193	-0.968743	0.000363864	0.577368	0.0477761	-0.48523	0.0822398	unbiased
AGAP000569	51	58	71	0	1	3	96	190	266	12	15	10	0.836501	0.0444539	3.82945	3.22e-07	3.58304	5.42e-18	6.57599	1.61e-20	unbiased
AGAP000570	5132	3908	5467	7	1714	508	362	329	571	3	832	4	-3.58341	0.0345765	-1.04879	0.519718	0.719286	0.690839	3.25391	0.0304026	Fe_Car_strong
AGAP000571	2	1	0	10	6	7	1	1	0	3	4	0	-1.00111	0.578828	-0.787022	0.463221	-1.65377	0.227949	-1.43968	0.216813	not_expressed
AGAP000572	26	77	62	84	40	41	44	74	130	24	65	39	-0.149452	0.808738	0.575528	0.197676	0.7136	0.115002	1.43858	0.000546539	unbiased
AGAP000573	317	392	236	527	348	400	200	266	367	92	168	84	-0.852877	1.27e-07	-0.971127	2.39e-09	1.07455	1.28e-10	0.956297	1.02e-10	unbiased
AGAP000574	74	51	57	135	24	50	64	104	122	325	719	163	-0.058343	0.93513	3.46261	1.03e-14	-2.14591	2.65e-06	1.37504	0.00342699	Ma_RT_strong
AGAP000575	10	5	1	413	250	249	4	4	4	14	23	9	-1.0367	0.170261	-3.3601	4.42e-21	-2.05689	0.000269137	-4.38029	7.97e-22	Fe_RT_specific
AGAP000576	138	161	127	312	181	221	130	277	425	126	236	91	0.208615	0.56374	0.248091	0.394328	0.637537	0.0244026	0.677013	0.0126884	unbiased
AGAP000577	747	1289	776	530	416	558	490	889	1239	308	667	259	-0.806047	0.00451731	0.552843	0.0377349	0.886003	0.000819115	2.24489	2.67e-19	unbiased
AGAP000578	184	231	188	296	169	231	197	315	506	150	272	221	0.022448	0.951101	0.853155	0.000416908	0.383476	0.142617	1.21418	3.53e-07	unbiased
AGAP000579	17	69	85	0	16	49	58	64	102	1	28	0	-0.298807	0.892731	-0.685069	0.671805	2.67035	0.0791513	2.28409	0.11608	unbiased
AGAP000580	2	0	0	307	1	0	2	1	2	1	3	2	0.454926	0.85345	-3.72263	0.0131472	-0.28844	0.888843	-4.46599	0.00377206	Fe_RT_specific
AGAP000581	3	0	0	389	0	0	1	0	1	0	1	1	-0.509479	0.867099	-3.91773	0.0488366	-0.0250281	0.991355	-3.43328	0.0837715	unbiased
AGAP000585	20	108	87	48	23	38	62	320	239	27	147	42	0.737746	0.349983	1.72385	0.00700567	1.36471	0.0377126	2.35081	0.000175679	unbiased
AGAP000586	548	276	169	4346	2947	2961	181	326	855	105	253	150	-0.332483	0.600598	-3.38656	1.2e-13	1.11374	0.024155	-1.94034	2.42e-05	Fe_RT_strong
AGAP000587	2	1	3	0	0	0	1	8	8	0	1	1	0.664959	0.660962	2.52562	0.151453	2.55439	0.0586055	4.41505	0.00563262	not_expressed
AGAP000588	6	6	6	153	95	100	5	6	11	5	10	4	-0.395462	0.591615	-3.23807	8.44e-14	0.00980904	0.988131	-2.8328	1.06e-10	Fe_RT_specific
AGAP000589	50	62	61	395	244	326	40	71	113	80	97	104	-0.372645	0.371234	-0.76581	0.012965	-0.653381	0.0529429	-1.04655	0.000752248	unbiased
AGAP000591	51	68	44	228	145	175	93	155	183	26	74	15	0.711589	0.0319329	-1.40422	2.39e-06	1.76496	4.79e-09	-0.35085	0.245845	unbiased
AGAP000592	3	4	4	0	0	0	98	171	199	0	0	0	4.71454	3.87e-18	0.668841	0.74452	9.159	6.8e-11	5.1133	0.000238068	Ma_Car_specific
AGAP000594	35	32	34	3	3	5	67	101	110	18	28	13	0.762024	0.0238404	3.25394	4.56e-10	2.02685	3.03e-10	4.51876	2.03e-19	unbiased
AGAP000595	267	254	250	15	10	35	558	913	730	90	179	69	0.818887	0.0482779	3.30366	1.44e-16	2.54339	1.67e-12	5.02817	8.95e-38	unbiased
AGAP000596	50	82	61	597	367	381	119	201	220	67	165	47	0.790333	0.0097346	-1.40344	5.8e-08	0.81224	0.00332097	-1.38153	1.58e-07	Fe_RT_weak
AGAP000597	10	10	11	196	103	111	5	5	12	3	18	12	-1.17675	0.0530044	-2.6789	1.25e-10	-0.753928	0.190874	-2.25608	6.84e-08	Fe_RT_specific
AGAP000598	104	148	111	182	96	133	141	194	331	73	115	100	0.163072	0.634019	0.476597	0.0711483	0.929305	0.000290025	1.24283	5.45e-07	unbiased
AGAP000599	8	12	6	44	12	18	15	16	26	12	20	21	0.464468	0.492781	0.573685	0.239914	-0.139255	0.815424	-0.0300377	0.957226	unbiased
AGAP000601	85	122	94	292	139	154	158	240	292	67	118	55	0.505845	0.0275982	-0.324936	0.136839	1.3193	1.34e-10	0.488517	0.0173513	unbiased
AGAP000602	60	102	75	233	155	188	92	153	215	81	128	46	0.245995	0.495676	-0.27099	0.351536	0.632332	0.0281128	0.115347	0.705826	unbiased
AGAP000603	139	50	1	24	45	188	46	75	41	129	38	43	-0.752631	0.59279	0.679231	0.552423	-0.683365	0.576707	0.748498	0.50726	unbiased
AGAP000604	194	84	9	14	105	406	122	158	106	247	111	205	-0.124939	0.941612	0.982422	0.415131	-0.802371	0.538659	0.30499	0.80528	unbiased
AGAP000605	3960	2618	7	1196	2047	10043	537	1085	819	1291	3369	417	-1.78688	0.253007	-0.64979	0.648843	-0.965348	0.511795	0.171742	0.902694	unbiased
AGAP000606	3	6	1	37	9	13	6	29	20	2	15	1	1.69328	0.0829761	-0.821976	0.331286	1.48159	0.0802413	-1.03366	0.235739	not_expressed
AGAP000607	1450	1177	859	0	0	0	0	2	1	1	1	0	-10.625	4.34e-39	2.31017	0.140358	0.257737	0.868497	13.1929	4.57e-26	Fe_Car_specific
AGAP000609	437	305	233	1	0	0	1	0	0	0	0	0	-9.98799	3.87e-18	-0.33522	0.861122	0.967676	0.63233	10.6204	1.2e-22	Fe_Car_specific
AGAP000610	710	872	671	0	0	11	0	1	1	1	1	4	-9.46999	8.53e-12	0.140553	0.924039	-1.4807	0.356437	8.12984	2.45e-11	Fe_Car_specific
AGAP000611	189	174	124	0	0	0	0	0	0	0	0	0	-10.463	2.37e-11	0.611915	0.778817	-0.128374	0.96145	10.9465	2.22e-14	Fe_Car_specific
AGAP000612	319	371	244	0	0	0	0	0	1	0	0	0	-10.0351	2.9e-18	0.646323	0.759366	1.00672	0.622779	11.6881	7.33e-18	Fe_Car_specific
AGAP000614	27	26	19	261	118	129	27	62	68	42	49	23	0.406387	0.358016	-1.14566	0.000239468	0.200939	0.608655	-1.35111	3.54e-05	Fe_RT_weak
AGAP000615	159	235	136	400	213	270	215	282	395	234	357	159	0.0837544	0.771792	0.710833	0.000212051	0.0450215	0.858342	0.6721	0.000559227	unbiased
AGAP000616	283	321	216	1419	842	991	247	357	453	304	445	255	-0.315442	0.0534348	-0.739129	1.94e-08	-0.152013	0.334337	-0.575701	1.71e-05	unbiased
AGAP000617	91	115	89	375	192	187	95	110	107	54	89	49	-0.56283	0.0422671	-0.999369	3.1e-05	0.529552	0.0463434	0.0930123	0.722318	unbiased
AGAP000618	1094	887	753	512	240	316	2002	2801	3639	354	654	419	0.920986	4.11e-06	1.39069	4.62e-13	2.3421	1.3e-36	2.81181	6.2e-51	unbiased
AGAP000619	50	71	39	717	472	488	26	56	101	23	70	20	-0.532587	0.219813	-3.02977	2.79e-19	0.503442	0.20988	-1.99374	1.34e-09	Fe_RT_strong
AGAP000620	19	37	29	266	157	205	15	54	98	20	58	20	0.175248	0.798038	-1.8009	4.47e-05	0.523331	0.308065	-1.45282	0.00108219	Fe_RT_weak
AGAP000621	0	0	1	0	0	0	2	2	5	1	0	0	2.11206	NA	1.98705	0.317649	2.42437	0.164809	2.29936	0.239818	not_expressed
AGAP000622	237	442	342	1357	617	730	248	395	718	209	525	155	-0.325755	0.457341	-0.713251	0.0366773	0.443578	0.231311	0.0560821	0.878985	unbiased
AGAP000623	55	54	33	87	74	77	58	104	177	49	102	32	0.522313	0.211897	0.457865	0.202337	0.679774	0.0585863	0.615326	0.0819511	unbiased
AGAP000624	111	125	81	175	120	141	182	201	208	245	425	207	0.267431	0.332534	1.91481	6.27e-21	-0.717644	0.00068363	0.929738	2.01e-05	Ma_RT_weak
AGAP000625	312	379	277	1101	553	720	411	502	592	292	489	279	-0.0244643	0.908915	-0.198796	0.165041	0.316061	0.0308089	0.14173	0.327988	unbiased
AGAP000626	115	195	123	1284	716	821	254	394	338	150	331	98	0.539909	0.0817119	-1.40273	4.01e-08	0.656195	0.0171085	-1.28644	5.73e-07	Fe_RT_weak
AGAP000627	200	399	276	2462	1454	1618	453	697	677	281	624	164	0.398672	0.294098	-1.51005	3.58e-07	0.665273	0.0377847	-1.24345	3.01e-05	Fe_RT_weak
AGAP000628	0	0	0	3	0	0	0	0	0	97	93	92	-0.428394	0.886679	7.42582	9.88e-17	-9.08495	8.97e-10	-1.23074	0.494414	Ma_RT_specific
AGAP000629	120	110	60	29	9	24	68	118	76	17	50	26	-0.776555	0.0585669	1.4976	0.000290287	1.34683	0.000495328	3.62099	1.86e-21	unbiased
AGAP000630	196	194	179	83	43	55	313	608	874	287	681	214	0.894171	0.00475845	3.55575	4.25e-34	0.423277	0.171191	3.08486	1.87e-25	unbiased
AGAP000631	105	157	139	519	280	315	158	336	440	93	262	60	0.462277	0.287091	-0.586371	0.10394	1.02393	0.00441406	-0.0247228	0.948452	unbiased
AGAP000633	165	230	179	356	96	109	240	380	496	194	333	189	0.249378	0.553522	1.4056	7.11e-06	0.40877	0.237883	1.56499	5.27e-07	unbiased
AGAP000634	87	90	40	775	440	516	37	46	77	58	132	106	-1.09959	0.00123931	-1.58051	1.71e-08	-1.1117	0.00040393	-1.59261	2.11e-08	Fe_RT_weak
AGAP000635	32	57	50	9	8	5	104	200	320	25	28	11	1.39872	0.000828067	2.42542	1.45e-06	2.97082	1.66e-13	3.99752	5.15e-17	Ma_Car_weak
AGAP000636	11	19	14	62	37	27	17	20	24	7	15	5	-0.188687	0.763964	-1.27725	0.0043643	0.99554	0.0436067	-0.0930256	0.834951	unbiased
AGAP000637	48	80	61	44	15	19	114	193	240	12	29	6	0.82463	0.018616	0.206585	0.648891	3.34143	1.16e-20	2.72339	1.19e-15	unbiased
AGAP000638	2	0	0	0	0	0	0	0	2	0	0	0	-0.523326	NA	0.171512	0.934842	1.34591	0.548207	2.04075	0.316951	not_expressed
AGAP000639	38	23	28	62	40	60	9	16	15	17	34	42	-1.84271	0.000344704	0.177893	0.7169	-1.45932	0.00293659	0.561286	0.212417	unbiased
AGAP000640	0	0	0	0	0	0	0	0	0	0	2	0	-0.205389	NA	1.9128	NA	-1.71222	NA	0.405971	NA	not_expressed
AGAP000641	21	26	26	80	29	42	38	47	104	38	130	99	0.618565	0.258544	1.78402	1.81e-05	-0.72322	0.107185	0.442236	0.348024	unbiased
AGAP000642	2	5	6	34	10	8	7	12	30	8	51	25	1.08319	0.236548	1.59291	0.0163541	-0.93461	0.194009	-0.424892	0.605554	unbiased
AGAP000643	4	2	6	11	5	8	8	14	32	5	34	27	1.30397	0.141699	2.30888	0.000733818	-0.52012	0.491409	0.484787	0.567593	unbiased
AGAP000644	6	11	7	14	6	6	12	14	18	6	14	16	0.213493	0.790545	1.44429	0.00859387	0.0620399	0.927767	1.29283	0.0252247	unbiased
AGAP000646	195	186	152	302	197	256	29	65	95	29	102	36	-2.23048	2.71e-12	-1.33382	1.91e-05	0.006883	0.986678	0.90354	0.00233541	Fe_Car_weak
AGAP000647	0	0	0	0	0	0	0	0	0	0	0	0	NA	NA	NA	NA	NA	NA	NA	NA	not_expressed
AGAP000648	60	59	49	530	304	343	38	45	88	53	93	49	-0.677962	0.0204885	-1.64697	2.85e-13	-0.406233	0.144316	-1.37524	1.91e-09	Fe_RT_weak
AGAP000649	87	73	69	146	89	115	257	310	430	43	87	51	1.42868	1.44e-10	-0.0223829	0.931358	2.26345	3.57e-25	0.812389	0.000314361	Ma_Car_weak
AGAP000650	60	49	14	822	564	621	14	23	24	14	27	17	-1.63782	0.000182843	-4.15551	1.48e-28	-0.133553	0.80715	-2.65124	3.69e-14	Fe_RT_strong
AGAP000651	6390	5397	4225	27127	13131	15248	5188	7970	10864	4178	8289	3100	-0.129775	0.68436	-0.909108	4.89e-05	0.446845	0.0635673	-0.332488	0.155544	unbiased
AGAP000652	164	193	108	536	354	418	114	153	172	63	124	68	-0.736902	0.000124238	-1.43889	3.37e-16	0.596174	0.00240048	-0.105818	0.568776	unbiased
AGAP000653	36	102	73	265	142	158	81	142	164	48	133	35	0.179887	0.738174	-0.528673	0.173387	0.712906	0.074027	0.00434542	0.992376	unbiased
AGAP000654	3557	4156	2671	5750	3556	5134	2020	2248	3296	1329	2454	2071	-1.11212	2.16e-06	-0.339118	0.145292	0.141268	0.592988	0.91427	3.2e-05	Fe_Car_weak
AGAP000655	2539	2992	2333	3415	1925	2739	1280	1491	2405	797	1626	1364	-1.29235	1.47e-07	-0.124127	0.64149	0.212328	0.434318	1.38055	2.02e-09	Fe_Car_weak
AGAP000656	93	108	63	410	280	284	78	106	130	120	179	69	-0.412473	0.166666	-0.488687	0.0393132	-0.41846	0.10956	-0.494673	0.0394793	unbiased
AGAP000657	1	0	0	0	0	1	1	0	1	0	2	0	0.282543	NA	1.01297	0.627061	0.127664	0.960465	0.858087	0.684759	not_expressed
AGAP000658	15	15	21	6	4	1	18	37	31	9	10	2	0.0254167	0.972873	1.80693	0.00938657	1.79065	0.00191789	3.57217	1.28e-08	unbiased
AGAP000659	49	102	60	571	245	289	104	162	195	54	175	25	0.453447	0.409489	-1.28176	0.00239073	0.800683	0.0776269	-0.934522	0.0284608	Fe_RT_weak
AGAP000660	66	113	57	357	189	213	95	155	158	70	105	55	0.132835	0.655416	-0.757324	0.000268089	0.614115	0.0058331	-0.276043	0.203495	unbiased
AGAP000662	193	370	201	1596	1026	1117	214	507	728	206	466	134	0.194734	0.675096	-1.35899	3.08e-05	0.644284	0.0681058	-0.909442	0.00578857	Fe_RT_weak
AGAP000663	90	132	147	512	254	305	154	264	276	52	126	12	0.176991	0.803745	-1.64652	0.000650396	1.77118	0.000339423	-0.0523385	0.920395	unbiased
AGAP000666	153	171	118	1589	965	1022	103	171	250	89	154	78	-0.461226	0.0340843	-2.53889	8.96e-46	0.47717	0.0204608	-1.6005	4.07e-20	Fe_RT_strong
AGAP000667	1	3	2	1	0	1	6	7	5	0	0	0	0.968579	0.454874	-1.14719	0.541001	4.77777	0.00337994	2.66199	0.0358648	not_expressed
AGAP000668	64	113	69	920	735	702	78	142	212	73	184	60	0.100812	0.825427	-2.06026	4.9e-13	0.270438	0.432379	-1.89063	4.84e-11	Fe_RT_weak
AGAP000669	2056	1798	1495	841	430	675	4433	5135	5331	532	1041	553	0.825545	0.000196992	1.05842	3.29e-07	2.65961	4.77e-40	2.89249	6.1e-47	unbiased
AGAP000670	76	83	86	379	201	257	45	71	82	62	86	68	-1.01178	0.000108694	-0.96208	1.98e-05	-0.370711	0.169888	-0.32101	0.168789	unbiased
AGAP000671	40	45	38	304	174	196	88	156	154	59	161	35	0.989256	0.00745907	-0.563223	0.0840565	0.537971	0.118914	-1.01451	0.00194822	unbiased
AGAP000672	353	388	207	1178	667	884	175	235	282	181	350	259	-1.1045	1.09e-07	-0.827918	1.71e-05	-0.403958	0.0590603	-0.127378	0.547414	unbiased
AGAP000673	35	78	49	9	1	0	87	173	188	8	17	4	0.769615	0.0952345	2.39001	0.000214799	3.71499	6.35e-16	5.33538	3.31e-20	unbiased
AGAP000674	6	9	5	288	189	197	5	10	9	0	15	4	-0.403565	0.593795	-4.25429	1.72e-19	0.205403	0.774236	-3.64532	1.99e-15	Fe_RT_specific
AGAP000675	57	66	33	1195	700	713	92	184	186	52	140	35	0.878965	0.0112709	-2.65775	2.42e-20	0.889066	0.00461107	-2.64765	1.85e-19	Fe_RT_strong
AGAP000676	24	52	32	289	163	197	10	30	48	64	160	50	-1.0178	0.0240355	-0.377388	0.313149	-1.8135	2.29e-06	-1.17309	0.00132322	unbiased
AGAP000678	35	56	42	157	66	105	34	79	111	27	68	19	0.012088	0.981248	-0.618368	0.0907257	0.777856	0.0401368	0.1474	0.705606	unbiased
AGAP000679	392	358	233	207	113	328	688	850	1069	532	422	640	0.737632	0.151466	2.3344	3.34e-08	0.365384	0.4581	1.96215	3.84e-06	unbiased
AGAP000680	16	10	7	204	94	97	5	2	5	6	13	16	-2.04586	0.00283568	-2.44386	1.22e-07	-1.69983	0.00830466	-2.09783	6.99e-06	Fe_RT_strong
AGAP000681	61	66	46	244	183	195	24	29	33	36	50	53	-1.66185	3.7e-07	-1.19051	1.62e-05	-0.931635	0.0045307	-0.460293	0.101232	Fe_Ubi_weak
AGAP000682	82	86	81	140	86	105	119	149	171	50	67	45	0.139349	0.64441	-0.0699224	0.795684	1.2226	9.43e-08	1.01333	3.55e-06	unbiased
AGAP000684	43	99	69	474	241	256	62	153	152	37	157	30	0.0805991	0.904844	-1.30749	0.00243265	0.629815	0.185933	-0.758275	0.084407	unbiased
AGAP000685	21	28	24	3	2	2	37	75	77	14	28	4	0.656608	0.183039	3.42841	1.88e-07	1.85734	2.11e-05	4.62915	3.36e-13	not_expressed
AGAP000686	15	16	14	95	47	69	21	21	36	5	15	8	0.110958	0.850911	-1.95515	6.63e-07	1.27619	0.00332064	-0.789923	0.0290326	not_expressed
AGAP000687	0	1	0	17	0	0	0	0	0	2	1	0	-1.36874	NA	-0.855024	0.681113	-2.24165	0.298066	-1.72793	0.387402	not_expressed
AGAP000688	2	3	5	0	0	0	8	17	15	1	1	0	1.27036	0.177249	2.48426	0.139358	3.85569	0.00053115	5.06959	0.000535849	unbiased
AGAP000689	177	187	134	35	42	81	95	158	177	26	78	21	-0.896771	0.0534117	0.404721	0.38208	1.65026	0.000110165	2.95176	1.79e-13	unbiased
AGAP000690	75	82	47	5	2	10	27	44	70	9	16	6	-1.22526	0.00103228	1.737	0.00124029	1.94024	5.71e-06	4.9025	1.89e-26	Fe_Car_weak
AGAP000691	192	254	238	81	45	87	346	598	980	510	922	626	0.728056	0.0233112	4.19336	3.73e-49	-0.37156	0.228635	3.09375	1.37e-26	unbiased
AGAP000692	6453	4691	3242	17	234	133	4549	4374	5797	12	20	21	-0.583352	0.544976	-2.02968	0.00699233	7.59623	6.66e-26	6.1499	1.82e-18	unbiased
AGAP000693	196	429	913	29	145	159	619	598	260	6	40	14	-0.678805	0.521635	-1.7943	0.0320425	4.49931	3.17e-08	3.38381	1.75e-05	unbiased
AGAP000694	4354	4541	3673	17	133	190	4243	5252	7874	9	37	7	-0.224461	0.829504	-2.02055	0.00522233	8.02057	4.57e-31	6.22448	1.26e-20	unbiased
AGAP000695	37	42	39	41	12	34	36	60	44	24	35	12	-0.42541	0.378743	0.666688	0.117265	0.800155	0.0572796	1.89225	8.67e-07	unbiased
AGAP000696	15	14	17	0	0	1	46	76	42	11	19	6	1.16067	0.0329448	5.05822	1.25e-06	2.03405	4.77e-05	5.9316	8.13e-09	Ma_Car_weak
AGAP000697	57	145	127	14	2	13	130	309	307	40	132	15	0.432075	0.574885	3.391	5.69e-08	1.89242	0.00142317	4.85135	2.38e-15	unbiased
AGAP000698	101	166	93	151	96	125	97	139	219	36	79	46	-0.344254	0.216795	-0.288796	0.272081	1.27651	1.85e-07	1.33197	3.02e-09	unbiased
AGAP000699	82	115	86	193	121	174	130	159	172	152	314	158	0.0479687	0.885451	1.25619	8.94e-11	-0.592507	0.00385242	0.61571	0.00313122	Ma_RT_weak
AGAP000700	184	232	196	410	212	282	282	374	470	168	323	140	0.192627	0.391367	0.40743	0.02343	0.661277	0.000203558	0.87608	4.13e-07	unbiased
AGAP000702	28	61	28	36	12	24	82	205	240	15	47	6	1.45376	0.00381475	0.756645	0.149104	2.78485	3.15e-09	2.08774	1.24e-05	Ma_Car_weak
AGAP000703	23	70	62	26	12	21	103	260	303	88	302	47	1.32073	0.0263508	3.58885	1.95e-11	0.510259	0.384546	2.77837	3.33e-07	Ma_Ubi_weak
AGAP000704	151	148	129	367	194	256	227	319	337	179	372	141	0.363036	0.138046	0.663659	0.00096654	0.207045	0.361499	0.507668	0.014156	unbiased
AGAP000705	199	273	159	296	219	239	152	166	282	68	141	98	-0.735278	0.00324476	-0.378159	0.120253	0.752674	0.00187907	1.10979	4.99e-07	unbiased
AGAP000706	0	0	0	0	0	0	0	0	0	0	0	0	NA	NA	NA	NA	NA	NA	NA	NA	not_expressed
AGAP000707	57	75	60	227	127	158	95	210	252	35	131	36	0.794944	0.0330384	-0.511716	0.135329	1.32056	7.11e-05	0.0138979	0.969839	unbiased
AGAP000708	563	782	585	496	323	394	857	1472	1988	285	608	194	0.440292	0.117421	0.696112	0.00430122	1.81028	1.33e-14	2.0661	6.71e-19	unbiased
AGAP000711	163	181	89	2051	1206	1312	66	114	151	152	299	182	-1.06611	1.96e-06	-1.90694	1.17e-24	-1.15716	2.68e-08	-1.99799	7.16e-26	Fe_RT_weak
AGAP000713	122	180	93	2211	1074	1255	98	231	263	186	428	146	-0.118273	0.766681	-1.67043	4.65e-11	-0.541432	0.0559805	-2.09359	3.83e-16	Fe_RT_weak
AGAP000714	1	1	1	0	0	0	1	0	1	0	0	1	-1.01684	NA	2.00203	0.318559	0.567865	0.794455	3.58673	0.0515833	not_expressed
AGAP000715	6	12	5	69	32	43	11	30	26	4	10	2	0.847835	0.149718	-2.19929	1.56e-05	1.83372	0.000746991	-1.2134	0.0103812	Fe_RT_specific
AGAP000717	174	90	94	971	597	694	353	487	316	197	644	183	1.03055	0.0238371	-0.33519	0.436461	0.162229	0.742041	-1.20351	0.0026599	unbiased
AGAP000718	157	90	90	10	64	35	2	6	4	0	25	0	-5.13602	3.04e-06	-1.69723	0.11242	-0.785861	0.535084	2.65293	0.00735288	Fe_Car_specific
AGAP000719	2018	1984	1147	3094	1990	2553	207	327	417	115	322	221	-3.10844	9.79e-36	-2.61849	3.98e-26	0.323614	0.264267	0.813568	0.00105457	Fe_Car_strong
AGAP000720	366	703	510	1132	599	742	1257	2610	2277	395	1093	181	1.25225	0.00446033	0.233861	0.599612	1.79194	7.77e-06	0.773553	0.0571094	Ma_Car_weak
AGAP000721	658	599	417	992	594	855	865	1307	1473	1019	2697	881	0.438577	0.130367	1.74225	1.58e-13	-0.443408	0.0868269	0.860268	0.000377401	unbiased
AGAP000723	202	278	212	1164	602	741	254	478	576	161	432	127	0.199025	0.56588	-0.934762	0.000258909	0.71745	0.00757569	-0.416337	0.115218	unbiased
AGAP000724	33	39	36	5	11	35	33	41	34	9	43	14	-0.632559	0.445086	1.02947	0.135395	0.669423	0.360451	2.33146	0.000287069	unbiased
AGAP000725	41	71	53	146	76	90	84	88	158	41	56	31	0.317134	0.3757	-0.31036	0.313537	1.13702	9.34e-05	0.509522	0.0757256	unbiased
AGAP000726	87	119	107	20	33	40	170	247	319	150	226	103	0.521616	0.214443	3.1767	5.95e-19	0.404036	0.287897	3.05912	1.97e-17	unbiased
AGAP000727	190	336	233	814	422	469	331	793	1069	171	510	111	0.776253	0.073338	-0.28018	0.491627	1.31887	0.000512371	0.262441	0.517961	unbiased
AGAP000728	27	35	26	132	62	73	93	151	140	72	193	70	1.44607	2.14e-06	1.22103	2.19e-06	0.0699742	0.831449	-0.155062	0.63676	Ma_Ubi_weak
AGAP000729	0	0	0	0	0	0	0	0	0	0	0	0	NA	NA	NA	NA	NA	NA	NA	NA	not_expressed
AGAP000730	0	0	0	0	0	0	0	0	0	0	0	0	NA	NA	NA	NA	NA	NA	NA	NA	not_expressed
AGAP000731	15	16	12	51	28	27	62	70	83	16	32	18	1.65648	3.47e-06	0.262479	0.465208	1.52147	1.13e-06	0.127465	0.749005	Ma_Car_weak
AGAP000732	13	3	1	6	2	24	2	1	7	1	3	1	-1.37692	0.329022	-1.65506	0.170835	0.693208	0.628646	0.415071	0.727837	not_expressed
AGAP000733	190	178	139	959	542	734	162	238	272	164	278	140	-0.278675	0.167458	-1.00336	9.35e-11	0.00906451	0.968942	-0.715617	5.31e-06	Fe_RT_weak
AGAP000734	17	16	15	4	0	4	11	16	24	2	6	4	-0.613257	0.305134	1.46467	0.0583856	1.83453	0.00303558	3.91246	1.27e-09	unbiased
AGAP000735	263	281	208	1015	746	883	134	172	303	158	339	169	-1.00961	1.38e-05	-1.10657	1.32e-07	-0.328604	0.173118	-0.425565	0.0483244	Fe_RT_weak
AGAP000736	31	58	64	148	66	81	41	98	122	47	92	34	0.000961152	0.998533	0.166242	0.694636	0.370763	0.382878	0.536044	0.165976	unbiased
AGAP000737	63	79	56	641	361	429	56	102	156	88	137	79	-0.0500174	0.889484	-1.27497	1.84e-10	-0.204652	0.413902	-1.42961	6.78e-12	Fe_RT_weak
AGAP000738	64	93	63	275	161	188	73	85	137	50	97	66	-0.254113	0.37477	-0.601036	0.00555377	0.254702	0.313203	-0.0922218	0.701577	unbiased
AGAP000739	5096	6255	4859	7660	4671	6133	2796	3502	4793	1933	3691	2760	-1.22925	1e-11	-0.186563	0.325539	0.181994	0.365267	1.22468	1.19e-12	Fe_Car_weak
AGAP000740	13	8	8	88	45	52	3	7	7	5	4	6	-1.44058	0.0241783	-2.57734	4.01e-07	-0.0808362	0.922397	-1.21759	0.00681065	Fe_RT_specific
AGAP000741	39	72	57	4	1	2	66	136	209	2	5	1	0.539038	0.252174	1.06585	0.209907	5.30964	2.96e-18	5.83645	1.01e-20	unbiased
AGAP000742	0	0	0	0	0	0	0	0	0	0	0	0	NA	NA	NA	NA	NA	NA	NA	NA	not_expressed
AGAP000743	179	221	175	3	0	0	279	323	431	7	1	5	0.173917	0.623116	2.73306	0.00128318	5.99897	1.54e-39	8.5581	1.3e-31	unbiased
AGAP000744	0	0	0	0	0	0	0	0	0	0	0	0	NA	NA	NA	NA	NA	NA	NA	NA	not_expressed
AGAP000745	6	21	21	2	3	1	100	201	144	63	101	47	2.49771	3.91e-08	5.80184	4.92e-19	0.875903	0.0363169	4.18003	7.51e-10	Ma_Car_strong
AGAP000747	387	510	395	1002	654	793	596	949	1239	1423	2823	3656	0.393932	0.371234	2.67574	9.06e-16	-1.80153	1.28e-07	0.480272	0.180204	Ma_RT_strong
AGAP000748	46	44	34	28	11	13	83	141	127	206	316	98	0.814701	0.0386915	4.48008	5.82e-35	-0.985031	0.00300875	2.68035	3.46e-12	Ma_RT_strong
AGAP000749	882	922	728	431	133	239	1223	1934	2104	1351	2559	1294	0.360271	0.155337	3.67936	1.54e-70	-0.173581	0.474414	3.14551	3.07e-51	unbiased
AGAP000750	230	471	343	13	0	1	469	496	690	17	26	25	0.0138691	0.980932	3.25342	1.11e-08	4.33083	3.29e-25	7.57038	8.59e-46	unbiased
AGAP000751	20	20	3	492	274	281	5	6	9	14	18	20	-1.69925	0.00410014	-3.28899	2.51e-16	-1.60137	0.00310336	-3.19112	1.26e-14	Fe_RT_strong
AGAP000752	221	153	147	295	154	206	102	167	184	89	180	162	-0.911348	0.00460041	0.381423	0.211493	-0.173566	0.618142	1.11921	8.41e-05	unbiased
AGAP000754	135	173	107	1220	897	977	104	187	249	96	232	115	-0.320465	0.220027	-1.92471	2e-22	0.0842442	0.750422	-1.52	1.88e-14	Fe_RT_weak
AGAP000755	378	274	242	205	53	83	525	711	799	1111	2230	1368	0.496815	0.174186	4.79612	1e-58	-1.388	3.84e-06	2.9113	7.05e-22	Ma_RT_strong
AGAP000756	114	131	118	399	181	244	144	223	328	210	353	117	0.207841	0.575898	0.657962	0.0163557	-0.166304	0.605766	0.283817	0.328201	unbiased
AGAP000757	49	50	41	145	119	117	31	30	72	34	50	45	-0.778397	0.0527165	-0.611834	0.074757	-0.225458	0.585665	-0.0588942	0.871623	unbiased
AGAP000758	37	38	18	179	106	114	42	38	67	33	62	35	0.00763991	0.986367	-0.676056	0.0157759	-0.0113233	0.976945	-0.695019	0.0165987	unbiased
AGAP000759	286	194	128	366	203	268	117	110	199	56	116	92	-1.17573	0.000954504	-0.695614	0.0400609	0.474603	0.197047	0.954715	0.00309577	Fe_Car_weak
AGAP000760	71	52	46	166	87	103	81	115	138	19	25	32	0.28631	0.465854	-1.20057	0.000198134	1.85789	8.63e-09	0.371017	0.235157	unbiased
AGAP000761	57	57	45	111	68	87	38	48	54	26	40	30	-0.853164	0.0024489	-0.514812	0.0544289	0.331667	0.280029	0.670019	0.00545822	unbiased
AGAP000762	18	16	10	196	98	101	12	17	28	24	17	15	-0.317709	0.592921	-1.75837	3.1e-06	-0.27043	0.590802	-1.7111	1.24e-05	Fe_RT_weak
AGAP000763	75	121	95	426	279	275	113	183	227	225	479	129	0.141635	0.749899	0.612187	0.041009	-0.80919	0.0085689	-0.338638	0.283736	unbiased
AGAP000765	26	63	43	271	150	147	60	160	166	45	113	19	0.811725	0.123443	-0.836408	0.063408	0.973259	0.0363169	-0.674875	0.13831	unbiased
AGAP000767	133	235	168	188	133	181	184	367	485	969	1729	423	0.221296	0.658965	3.45075	2.94e-23	-1.76527	7.03e-07	1.46418	4.53e-05	Ma_RT_strong
AGAP000768	74	79	58	5	1	11	166	199	277	38	61	30	0.928374	0.00060569	3.78537	5.96e-19	2.11253	3.54e-16	4.96952	4.93e-33	unbiased
AGAP000769	288	284	216	1534	806	851	250	360	468	166	488	194	-0.242998	0.403122	-1.02507	2.84e-06	0.210993	0.413011	-0.571084	0.0103189	Fe_RT_weak
AGAP000770	82	123	78	247	174	213	63	107	167	65	122	68	-0.452451	0.103218	-0.402217	0.0918008	0.166236	0.551282	0.21647	0.371159	unbiased
AGAP000771	41	56	32	175	115	124	34	44	46	35	44	21	-0.706426	0.0251677	-1.10326	2.41e-05	0.107609	0.764576	-0.289226	0.276859	unbiased
AGAP000772	4	9	1	103	62	83	0	1	4	1	5	1	-2.01455	0.0381978	-4.15485	1.37e-09	-0.615821	0.571048	-2.75612	2.25e-06	Fe_RT_specific
AGAP000773	5	31	7	305	37	61	9	21	24	6	65	3	-0.267836	0.844703	-1.5365	0.0859385	-0.353388	0.746798	-1.62205	0.0692781	unbiased
AGAP000774	70	145	99	687	486	524	77	196	260	87	225	67	0.0196655	0.970937	-1.32963	0.000108866	0.304994	0.449598	-1.0443	0.00255988	Fe_RT_weak
AGAP000776	246	353	304	427	368	408	258	467	592	158	417	97	-0.186269	0.697671	-0.0704232	0.855262	0.841992	0.0176411	0.957837	0.00450876	unbiased
AGAP000777	14	31	19	61	26	40	34	28	37	11	19	18	0.0124887	0.983119	-0.398382	0.362665	0.847433	0.0530423	0.436562	0.290603	unbiased
AGAP000778	17	32	22	12	11	13	55	82	133	13	16	15	1.21616	0.0016998	1.22546	0.00616431	2.3236	6.9e-10	2.3329	1.64e-08	Ma_Car_weak
AGAP000779	5	21	22	32	10	7	20	87	89	11	50	6	1.18451	0.169045	1.24617	0.101095	1.407	0.0629056	1.46866	0.0500312	unbiased
AGAP000780	70	72	50	240	117	121	90	121	121	100	143	118	0.131448	0.715377	0.608618	0.0107445	-0.347968	0.185647	0.129202	0.639316	unbiased
AGAP000781	132	113	101	103	49	70	107	141	189	97	132	130	-0.360758	0.272998	1.70982	1.72e-10	0.0132276	0.970109	2.0838	5.22e-15	unbiased
AGAP000782	11	17	6	81	56	41	16	9	18	5	11	7	-0.26193	0.717132	-1.9922	5.2e-05	0.727417	0.216071	-1.00285	0.0333861	Fe_RT_specific
AGAP000783	162	205	145	1405	867	893	202	358	421	161	401	104	0.233713	0.518547	-1.40346	9.66e-08	0.426877	0.147643	-1.2103	4.83e-06	Fe_RT_weak
AGAP000784	183	318	267	162	130	204	107	138	200	117	204	123	-1.47818	1.1e-06	0.734078	0.0130743	-0.212451	0.535726	1.99981	9.69e-13	Fe_Car_weak
AGAP000785	60	24	11	13	15	65	51	98	59	72	74	47	0.46496	0.630979	1.89408	0.00758847	-0.133082	0.886655	1.29604	0.0748983	unbiased
AGAP000786	11	7	9	16	6	2	8	9	17	0	2	0	-0.38216	0.693039	-2.24923	0.0390975	3.51294	0.00112725	1.64587	0.0202259	not_expressed
AGAP000787	114	212	138	744	464	616	182	305	460	192	461	129	0.31662	0.421893	-0.384204	0.222975	0.120173	0.747579	-0.580652	0.0592061	unbiased
AGAP000788	0	1	1	0	0	1	0	0	2	0	1	0	-0.614095	NA	0.420314	0.845091	0.555466	0.814782	1.58988	0.418838	not_expressed
AGAP000789	3	3	1	8	5	12	2	2	1	48	128	56	-1.05269	0.353699	4.03129	7.95e-18	-5.49597	8.91e-15	-0.411988	0.604518	Ma_RT_specific
AGAP000790	51	68	33	5	4	8	69	83	84	30	44	15	0.0153294	0.974704	3.23133	6.89e-12	1.24129	0.00038605	4.45729	1.36e-22	unbiased
AGAP000791	148	132	102	746	475	524	152	206	238	140	218	159	-0.0360983	0.904286	-0.793597	1.02e-05	-0.0188795	0.941263	-0.776379	2.31e-05	unbiased
AGAP000792	315	373	298	497	310	379	220	538	695	135	527	49	-0.200077	0.790253	-0.033918	0.952004	0.965028	0.0750008	1.13119	0.0270046	unbiased
AGAP000793	19	17	8	5	3	1	8	18	19	8	13	8	-0.644846	0.286255	2.54887	9.92e-05	0.394975	0.506103	3.58869	9.76e-09	unbiased
AGAP000794	1966	2489	1837	767	502	680	4036	6194	6748	689	1244	719	0.749021	2.62e-09	1.36472	4.59e-28	2.47273	3.23e-96	3.08843	9.74e-145	unbiased
AGAP000795	8	6	15	12	15	18	14	30	45	5	12	1	0.783667	0.319477	-0.526661	0.478183	2.06841	0.00254895	0.758085	0.25722	not_expressed
AGAP000797	11	22	21	140	103	96	18	55	71	26	79	16	0.631298	0.300362	-0.688853	0.145982	0.0947312	0.877622	-1.22542	0.0102026	unbiased
AGAP000798	24	24	24	7	2	7	91	141	180	66	142	50	1.79997	3.56e-08	4.82503	3.44e-28	0.506171	0.0892605	3.53123	2.6e-14	Ma_Ubi_weak
AGAP000801	23	30	27	0	0	1	89	184	204	18	27	13	1.84936	1.35e-08	5.70995	4.49e-09	2.79027	1.07e-17	6.65085	4.86e-12	Ma_Car_weak
AGAP000803	47	40	54	9	9	11	148	221	310	60	102	54	1.521	6.96e-07	3.7635	2.56e-23	1.4233	5.56e-07	3.6658	1.43e-21	Ma_Car_weak
AGAP000804	45	43	34	22	8	15	39	57	80	43	74	47	-0.166987	0.660835	2.80874	1.4e-18	-0.122482	0.70558	2.85325	1.81e-18	unbiased
AGAP000805	31	39	29	1	3	1	71	163	158	10	15	2	1.26554	0.00117223	3.10212	1.85e-05	3.61527	2.78e-17	5.45186	4.21e-16	Ma_Car_weak
AGAP000806	588	837	605	34	13	67	161	226	454	43	55	70	-1.97756	0.000101471	1.55107	0.00211983	1.93692	8.66e-05	5.46555	1.17e-30	Fe_Car_weak
AGAP000807	96	142	104	45	41	45	138	177	207	116	238	126	-0.0547656	0.869779	2.75487	2.89e-33	-0.0518004	0.84808	2.75783	2.35e-32	unbiased
AGAP000808	135	180	151	256	167	233	132	209	356	108	185	87	-0.156463	0.654069	0.121387	0.67419	0.633804	0.0171896	0.911654	0.000255248	unbiased
AGAP000809	57	56	26	156	76	119	26	31	91	18	45	21	-0.623207	0.208986	-1.13342	0.00587158	0.580716	0.209096	0.0705	0.871	unbiased
AGAP000810	202	236	189	226	124	183	287	564	795	87	231	76	0.644941	0.0332783	0.42238	0.142641	1.87682	1.89e-12	1.65426	4.04e-10	unbiased
AGAP000812	101	209	177	300	101	145	188	360	422	110	402	53	0.261689	0.704463	0.856487	0.0879915	0.727529	0.168332	1.32233	0.00652294	unbiased
AGAP000813	54	38	46	146	107	102	41	39	50	37	61	66	-0.758216	0.083742	-0.137219	0.736568	-0.555948	0.17093	0.0650481	0.869722	unbiased
AGAP000814	11	16	10	140	105	84	9	29	40	18	36	12	0.336812	0.576073	-1.42662	0.000233618	0.0127751	0.981047	-1.75066	2.4e-05	Fe_RT_weak
AGAP000815	509	701	494	633	400	532	923	1610	1751	491	969	285	0.633556	0.0240365	1.01262	4.3e-05	1.13706	5.03e-06	1.51613	5.01e-10	unbiased
AGAP000816	0	0	0	0	0	0	0	0	0	14	36	32	-0.363158	0.905072	8.12428	2.68e-07	-7.69219	3.98e-06	0.795249	0.716316	Ma_RT_specific
AGAP000817	0	0	0	0	0	0	0	0	0	52	68	50	-0.386355	0.898864	9.15963	1.33e-09	-8.70282	4.84e-08	0.843159	0.697498	Ma_RT_specific
AGAP000818	291	284	93	19	116	338	834	1357	1030	309	487	476	1.60721	0.0626706	2.17332	0.00372538	1.0594	0.193945	1.62551	0.0315892	unbiased
AGAP000819	0	0	0	0	0	0	0	0	0	0	1	0	-0.205389	NA	1.42375	NA	-1.20522	NA	0.423919	NA	not_expressed
AGAP000820	22	21	22	1	0	0	616	743	207	116	82	13	3.88606	7.12e-07	7.32326	1.01e-11	2.67407	0.000349592	6.11127	1.86e-08	Ma_Car_strong
AGAP000821	2	8	5	2	0	0	14	16	8	0	1	1	0.762021	0.468177	0.865293	0.559862	3.79634	0.000818667	3.89961	0.000508364	not_expressed
AGAP000822	18	17	9	0	0	0	48	66	58	6	10	5	1.3251	0.00288251	5.23004	3.71e-05	2.84145	9.37e-10	6.74639	4.89e-08	Ma_Car_weak
AGAP000823	104	106	80	469	217	266	230	324	331	148	253	95	0.939172	0.000124238	0.0068496	0.977991	0.672431	0.00320743	-0.259892	0.277159	unbiased
AGAP000824	205	353	228	131	79	141	307	441	394	281	583	297	-0.100731	0.771829	2.6143	1.22e-28	-0.174684	0.522468	2.54035	9.88e-27	unbiased
AGAP000825	35	35	20	306	190	193	31	47	48	22	52	26	-0.181664	0.64441	-1.85913	4.39e-14	0.151822	0.652438	-1.52565	1.11e-09	Fe_RT_weak
AGAP000826	118	133	86	709	386	436	86	134	182	81	105	64	-0.435509	0.057584	-1.63342	3.17e-18	0.438712	0.0425811	-0.759202	3.79e-05	Fe_RT_weak
AGAP000829	133	188	139	780	443	575	180	239	386	155	253	135	0.107436	0.691578	-0.781434	1.92e-05	0.341504	0.0928587	-0.547365	0.00328076	unbiased
AGAP000830	41	66	28	509	272	245	36	78	71	34	68	22	-0.207294	0.640277	-2.1147	1.89e-12	0.395167	0.275	-1.51224	4.01e-07	Fe_RT_weak
AGAP000831	128	121	92	442	336	353	56	70	117	116	138	115	-1.18421	3.54e-05	-0.644637	0.0118969	-0.87919	0.00138094	-0.339617	0.20049	unbiased
AGAP000832	257	243	147	620	353	382	137	175	303	142	175	177	-0.763948	0.0147807	-0.426024	0.139673	0.00906716	0.979953	0.346991	0.227032	unbiased
AGAP000833	54	72	56	7	7	24	65	116	120	43	50	40	0.0281499	0.962166	2.70622	1.17e-09	0.894001	0.0329811	3.57207	2.59e-16	unbiased
AGAP000834	211	60	22	47	48	210	215	368	251	189	525	203	0.832601	0.380428	2.261	0.00234357	-0.218685	0.81579	1.20972	0.11424	unbiased
AGAP000835	59	55	0	1810	1282	1370	0	0	1	19	114	17	-5.68332	6.42e-05	-3.88159	0.000746026	-5.48574	4.54e-05	-3.68401	0.0013522	Fe_RT_strong
AGAP000837	131	76	1	3561	2099	2036	1	1	9	0	54	3	-4.07872	0.00954209	-5.69349	3.56e-05	-1.79769	0.252837	-3.41246	0.0142959	Fe_RT_specific
AGAP000839	11	15	0	384	204	203	0	0	1	0	6	0	-4.34569	0.000894553	-5.97902	1.79e-11	-1.85388	0.189786	-3.4872	3.27e-06	Fe_RT_specific
AGAP000840	4	1	3	2	4	9	1	5	5	0	2	0	-0.31335	0.847093	-1.86849	0.147603	1.9723	0.149861	0.417154	0.71804	not_expressed
AGAP000841	11	28	17	178	91	105	21	47	52	21	39	10	0.400094	0.424	-1.486	2.86e-05	0.577869	0.160034	-1.30823	0.000334108	Fe_RT_weak
AGAP000842	137	129	100	223	124	196	162	205	233	68	110	78	0.0448426	0.891713	-0.125844	0.60454	1.01941	2.76e-06	0.848722	4.59e-05	unbiased
AGAP000843	227	199	155	350	276	311	158	169	209	89	160	143	-0.768355	0.0123739	-0.315631	0.279578	0.240083	0.452142	0.692807	0.0107826	unbiased
AGAP000844	207	76	54	112	73	55	82	214	232	40	94	24	-0.104086	0.896215	0.23965	0.686355	1.54077	0.00388951	1.8845	0.000212027	unbiased
AGAP000847	403	873	693	224	141	274	789	1457	1861	151	375	108	0.331278	0.488715	0.799166	0.035172	2.52437	2.93e-12	2.99226	4.78e-17	unbiased
AGAP000848	53	85	82	8	1	5	157	271	398	19	32	12	1.15656	0.00124305	3.02898	6.76e-09	3.45741	5.25e-22	5.32983	1.53e-27	Ma_Car_weak
AGAP000849	1037	883	702	523	268	399	2445	2793	2292	299	485	448	0.896658	0.0055023	1.05109	0.000361308	2.41124	4.08e-17	2.56568	2.36e-19	unbiased
AGAP000850	47	52	44	145	105	116	29	62	109	23	45	20	-0.270697	0.532426	-1.15369	0.000518062	0.927659	0.00908674	0.0446642	0.898969	unbiased
AGAP000851	3729	3151	2814	794	451	684	8227	9809	11245	829	1429	952	0.920972	1.76e-05	1.68392	4.46e-17	2.99068	8.76e-53	3.75363	1.62e-81	unbiased
AGAP000852	582	661	379	5323	3063	3360	349	508	594	308	637	350	-0.824334	1.87e-08	-2.24794	9.58e-65	-0.0241592	0.900215	-1.44776	4.45e-28	Fe_RT_weak
AGAP000853	3	12	11	1	0	3	23	45	44	30	48	23	1.39641	0.00915878	5.29728	7.44e-13	-0.0645105	0.906695	3.83636	9e-07	unbiased
AGAP000854	4	3	7	6	5	10	17	16	28	7	10	5	1.3884	0.048085	0.954846	0.141272	1.24974	0.0377076	0.816194	0.236818	unbiased
AGAP000855	192	228	135	373	204	259	146	170	323	79	193	197	-0.481694	0.241452	0.152617	0.686911	0.178755	0.656608	0.813066	0.0150101	unbiased
AGAP000856	66	66	39	452	282	346	29	31	55	17	46	23	-1.2409	2.92e-05	-2.73338	2.75e-25	0.23467	0.506541	-1.25781	1.5e-07	Fe_RT_strong
AGAP000857	181	176	113	443	282	313	83	151	155	55	120	116	-0.955882	0.00175141	-0.864636	0.00191542	0.165747	0.625825	0.256994	0.375031	unbiased
AGAP000858	22	19	23	0	1	2	17	25	49	1	2	0	-0.245714	0.729213	0.816452	0.503601	4.43528	5.14e-07	5.49744	6.37e-11	unbiased
AGAP000859	5	4	15	1	0	0	10	21	22	0	1	2	0.322553	0.774557	1.91345	0.180512	3.63416	0.000474421	5.22505	1.2e-05	unbiased
AGAP000860	9	15	15	52	11	24	35	66	107	6	8	0	1.63169	0.00561864	-1.56676	0.014029	3.57011	5.36e-09	0.371659	0.533762	Ma_Car_specific
AGAP000861	64	91	61	516	334	315	56	151	186	111	204	43	0.118296	0.844217	-0.835234	0.032331	-0.0660724	0.899306	-1.0196	0.00862181	unbiased
AGAP000862	547	795	562	2137	1201	1604	558	821	1270	516	895	459	-0.230738	0.283536	-0.465315	0.00703965	0.274455	0.143418	0.0398772	0.83219	unbiased
AGAP000863	3	9	4	1	0	0	7	12	16	1	1	0	0.464937	0.634167	1.45919	0.334425	3.62408	0.000897741	4.61834	0.000106805	unbiased
AGAP000864	28	57	51	236	149	171	73	127	130	53	112	43	0.578428	0.0863761	-0.525533	0.0620466	0.493107	0.100435	-0.610854	0.0329046	unbiased
AGAP000865	81	141	79	492	330	282	124	285	345	110	340	61	0.605979	0.218277	-0.332365	0.441472	0.449646	0.315322	-0.488698	0.243639	unbiased
AGAP000866	24	16	11	36	42	50	5	14	2	7	18	24	-1.86165	0.0181782	-0.460972	0.511099	-1.39919	0.0600995	0.00148883	0.998697	unbiased
AGAP000867	11	9	9	34	37	38	3	7	0	4	10	6	-2.11224	0.00740041	-1.56129	0.0101488	-1.09586	0.171509	-0.54491	0.36787	Fe_Ubi_weak
AGAP000868	92	155	128	670	318	411	147	329	414	125	316	81	0.495386	0.233306	-0.551393	0.11275	0.60682	0.0926262	-0.439959	0.210494	unbiased
AGAP000869	108	113	62	1188	852	814	131	243	264	143	518	105	0.482752	0.300501	-1.13811	0.00164551	-0.321669	0.443235	-1.94254	6.82e-08	Fe_RT_weak
AGAP000870	82	138	63	1145	743	810	107	242	314	43	176	40	0.522108	0.261456	-2.58524	1.28e-12	1.23436	0.0014124	-1.87298	2.63e-07	Fe_RT_strong
AGAP000871	0	0	0	0	0	0	0	0	0	0	1	0	-0.205389	NA	1.42375	NA	-1.20522	NA	0.423919	NA	not_expressed
AGAP000874	5	10	4	1	0	1	19	27	30	3	6	1	1.34616	0.0334971	2.81431	0.00688124	2.71001	2.64e-05	4.17816	1.79e-05	unbiased
AGAP000875	18	15	6	184	140	142	18	25	53	0	9	1	0.584559	0.353898	-4.60649	2.35e-14	3.00055	2.52e-06	-2.1905	2.61e-06	Fe_RT_specific
AGAP000876	0	0	1	1	0	1	1	1	1	0	1	0	0.704479	NA	-0.0614626	0.974255	1.19462	0.547044	0.428677	0.82075	not_expressed
AGAP000877	833	668	471	95	9	129	1289	1834	2068	541	546	129	0.700118	0.406455	3.30064	3.69e-07	1.82534	0.00703894	4.42587	5.64e-12	unbiased
AGAP000878	0	1	0	0	0	1	1	1	1	0	0	0	0.887261	NA	-0.881294	0.686911	2.58733	0.214317	0.818771	0.697415	not_expressed
AGAP000879	24	21	10	108	100	114	13	25	13	8	22	5	-0.737698	0.211445	-2.36027	3.7e-07	0.423926	0.470844	-1.19865	0.00688126	Fe_RT_specific
AGAP000880	114	137	69	736	392	429	204	294	260	111	201	99	0.608867	0.00922854	-0.973248	1.05e-06	0.714693	0.00068571	-0.867422	1.92e-05	unbiased
AGAP000881	554	709	483	34	75	227	81	113	168	30	121	24	-2.89138	1.25e-05	-0.306156	0.670552	0.972792	0.160087	3.55802	5.63e-09	Fe_Car_strong
AGAP000882	5	20	13	79	48	59	15	16	24	285	277	38	-0.114908	0.910276	2.57305	1.81e-05	-3.55805	1.21e-08	-0.870094	0.197982	Ma_RT_strong
AGAP000883	3356	4984	3623	10454	6374	8047	2341	3387	4543	2096	4072	2633	-0.912517	1.4e-08	-0.561581	0.000279214	0.000882412	0.996349	0.351818	0.0247368	unbiased
AGAP000884	97	91	74	1052	612	698	105	186	201	78	119	47	0.206845	0.469617	-2.33468	3.13e-30	0.80093	0.00036816	-1.7406	9.22e-18	Fe_RT_strong
AGAP000885	44	48	30	1213	58	195	99	150	206	70	942	36	1.13822	0.308797	0.33973	0.73604	-0.988838	0.318482	-1.78733	0.0476274	unbiased
AGAP000886	116	97	91	468	253	254	73	96	122	92	172	88	-0.7559	0.0023932	-0.521845	0.0154187	-0.462294	0.0534843	-0.22824	0.311019	unbiased
AGAP000887	65	77	58	192	108	159	16	36	59	9	36	23	-1.5759	1.12e-05	-1.83015	9.52e-08	0.471666	0.253688	0.217419	0.52535	Fe_Ubi_weak
AGAP000888	53	53	32	146	90	99	22	29	62	34	42	28	-0.98728	0.00580742	-0.713894	0.0230492	-0.149427	0.712072	0.12396	0.713189	unbiased
AGAP000889	373	314	284	1158	704	800	279	386	502	320	638	269	-0.43857	0.0550421	-0.217002	0.293852	-0.242938	0.267765	-0.0213707	0.920426	unbiased
AGAP000890	175	165	78	286	178	232	75	97	113	36	69	42	-1.19233	1.2e-05	-1.30795	7.27e-07	0.759936	0.00822168	0.644312	0.00950265	Fe_Car_weak
AGAP000891	111	187	135	672	431	562	170	201	211	166	304	137	-0.215496	0.463971	-0.551124	0.0114326	-0.208275	0.410611	-0.543903	0.0133328	unbiased
AGAP000892	0	0	0	0	0	0	0	0	0	5	0	2	-0.258039	NA	4.29464	0.0299503	-4.01461	0.0513209	0.538063	0.804236	not_expressed
AGAP000893	44	85	78	1	0	1	149	318	395	61	182	37	1.29128	0.00945368	7.16613	6.46e-17	1.48641	0.00107746	7.36126	8.62e-18	Ma_Car_weak
AGAP000894	127	173	110	765	490	547	124	235	276	70	157	59	-0.0660075	0.829762	-1.76456	3.53e-19	0.960288	4.98e-06	-0.738264	0.000138651	Fe_RT_weak
AGAP000896	47	49	32	233	134	156	20	21	20	24	41	23	-1.71339	4.79e-08	-1.62026	1.66e-10	-0.707223	0.0341028	-0.614093	0.0115629	Fe_RT_weak
AGAP000897	1485	2182	1568	1247	649	918	1261	1591	2054	406	631	476	-0.762231	1.84e-05	0.0929216	0.631371	1.46287	2.09e-18	2.31802	3.25e-46	unbiased
AGAP000898	86	143	97	825	531	629	74	207	267	56	177	38	-0.0030548	0.995687	-2.06296	4.07e-08	0.859279	0.0356434	-1.20063	0.00149014	Fe_RT_weak
AGAP000899	13	9	9	9	2	6	16	19	28	8	18	5	0.328361	0.624899	1.74916	0.00263789	0.852884	0.108808	2.27368	6.47e-05	unbiased
AGAP000900	103	161	123	605	357	424	133	229	224	339	647	129	-0.0883137	0.878785	0.535258	0.149342	-1.04112	0.00501431	-0.417546	0.269555	unbiased
AGAP000901	1749	2206	1724	628	381	773	2131	3754	3609	799	1956	565	0.0471203	0.917653	1.70585	1.33e-08	1.39449	5.09e-06	3.05322	4.83e-25	unbiased
AGAP000903	15	32	16	22	12	14	18	35	37	17	50	16	-0.153771	0.791986	1.65072	4.71e-05	-0.0338461	0.948789	1.77065	1.71e-05	unbiased
AGAP000904	308	348	322	192	61	78	410	926	1146	208	645	122	0.573255	0.260911	2.40385	4.94e-09	1.22703	0.0038389	3.05762	6e-14	unbiased
AGAP000906	313	365	284	203	88	121	482	730	861	362	785	359	0.415157	0.021803	2.79653	1.4e-64	0.288287	0.0877145	2.66966	2.03e-57	unbiased
AGAP000907	22	15	12	129	61	63	65	79	56	39	29	55	1.38421	0.0126667	0.0871263	0.868882	0.409201	0.44528	-0.887883	0.0788728	unbiased
AGAP000908	95	91	67	702	430	471	74	127	162	76	182	67	-0.183817	0.555406	-1.41591	2.83e-11	-0.0122064	0.969253	-1.2443	8.69e-09	Fe_RT_weak
AGAP000909	272	436	259	1123	604	735	252	436	557	295	514	171	-0.32513	0.280257	-0.414479	0.0947839	0.150905	0.597995	0.0615564	0.81609	unbiased
AGAP000911	125	174	111	471	143	175	103	119	167	95	147	110	-0.73054	0.0315496	-0.0895633	0.792917	-0.0836023	0.82833	0.557374	0.0626857	unbiased
AGAP000912	23	29	38	64	28	44	32	53	81	15	42	12	0.126707	0.829762	-0.0831285	0.857015	1.08814	0.00914999	0.878301	0.0266318	unbiased
AGAP000913	209	320	216	1117	623	722	241	328	441	231	395	178	-0.238538	0.261456	-0.67845	4.01e-05	0.133749	0.50071	-0.306162	0.073258	unbiased
AGAP000915	2	7	8	0	0	0	18	21	29	6	2	2	1.29258	0.11682	4.43656	0.00158691	2.41812	0.00157054	5.5621	4.64e-05	unbiased
AGAP000916	0	0	0	0	0	0	0	0	0	13	27	18	-0.355247	0.907246	7.69594	1.5e-06	-7.27154	1.62e-05	0.779645	0.722478	Ma_RT_specific
AGAP000917	0	0	0	0	0	0	0	0	0	7	13	13	-0.337879	0.910432	6.93937	2.98e-05	-6.53471	0.000183482	0.742539	0.735796	unbiased
AGAP000918	0	0	0	0	0	0	0	0	0	2	1	2	-0.293656	NA	4.22426	0.0294321	-3.90165	0.0541672	0.616269	0.778556	not_expressed
AGAP000919	0	0	0	0	0	0	0	0	0	2	3	4	-0.30613	NA	5.08324	0.00580001	-4.7311	0.0140702	0.658269	0.764711	not_expressed
AGAP000920	0	0	0	0	0	0	0	0	0	3	1	0	-0.241113	NA	3.26675	0.108387	-3.03043	0.154047	0.477431	0.822017	not_expressed
AGAP000921	0	0	0	0	0	0	0	0	0	0	0	0	NA	NA	NA	NA	NA	NA	NA	NA	not_expressed
AGAP000922	1	1	1	1	2	0	4	1	5	3	8	3	1.00227	0.502498	2.78561	0.0113792	-0.566558	0.611973	1.21678	0.358453	not_expressed
AGAP000923	106	107	61	651	389	432	89	145	158	117	152	121	-0.157117	0.599507	-0.926291	4.11e-06	-0.248713	0.300837	-1.01789	7.94e-07	unbiased
AGAP000924	96	98	52	1439	936	993	73	122	115	91	168	108	-0.329021	0.215288	-2.25863	4.75e-34	-0.449543	0.0430204	-2.37916	6.71e-35	Fe_RT_weak
AGAP000926	458	541	508	750	458	582	473	960	1125	600	1264	449	0.0169775	0.963163	1.23722	1.92e-07	-0.0397453	0.902214	1.1805	7.17e-07	unbiased
AGAP000927	813	820	591	2513	919	1192	1004	1416	1797	1471	2484	1695	0.235214	0.3757	1.31946	5.26e-11	-0.650867	0.00207458	0.433374	0.0393795	Ma_RT_weak
AGAP000928	44	35	35	215	124	141	53	59	75	26	51	26	0.0358124	0.930197	-1.28076	5.62e-07	0.679835	0.017743	-0.636736	0.0126844	Fe_RT_weak
AGAP000929	13	27	22	3	2	1	51	85	75	23	40	16	1.08965	0.00691669	4.44458	3.22e-12	1.23321	0.000634041	4.58813	8.23e-13	unbiased
AGAP000930	98	114	59	1149	628	668	64	197	207	61	159	26	0.0600236	0.924375	-2.46097	1.54e-09	0.774379	0.0861165	-1.74661	1.83e-05	Fe_RT_strong
AGAP000931	100	113	84	189	108	134	91	109	125	69	132	90	-0.532166	0.0175715	0.382646	0.0568989	-0.0338167	0.899891	0.880996	4.12e-06	unbiased
AGAP000932	163	247	195	545	352	392	231	516	597	128	410	83	0.409715	0.375307	-0.273608	0.488273	1.00088	0.00758942	0.317561	0.409843	unbiased
AGAP000933	28	38	25	42	23	31	51	40	43	33	51	38	-0.0431239	0.935258	1.30796	0.000174457	-0.0254494	0.957164	1.32564	0.00019611	unbiased
AGAP000934	49	54	41	107	67	85	18	32	27	20	32	14	-1.57378	2.99e-07	-1.03892	0.000345313	0.0255966	0.954571	0.560461	0.0304812	Fe_Car_weak
AGAP000935	3151	3018	2595	769	513	859	9396	12100	12002	911	1778	1013	1.26677	4.34e-08	1.68534	1.91e-14	3.00833	3.03e-44	3.4269	1.32e-56	Ma_Car_weak
AGAP000937	1	5	1	0	0	0	4	11	8	0	1	0	1.07431	0.405902	1.80041	0.337721	3.83379	0.00648082	4.55989	0.00378593	unbiased
AGAP000938	7	3	5	0	0	1	15	36	34	3	5	0	1.74039	0.0178878	3.07077	0.0116475	3.13747	2.74e-05	4.46786	9.52e-05	unbiased
AGAP000939	29	42	19	487	298	342	31	47	58	23	41	20	-0.0721373	0.86355	-2.80677	4.58e-33	0.48851	0.0950529	-2.24612	2.29e-22	Fe_RT_strong
AGAP000940	90	100	75	2	2	2	210	360	360	32	31	8	1.11567	0.00219884	4.27352	2.76e-11	3.45905	3.44e-22	6.6169	9.26e-27	Ma_Car_weak
AGAP000941	551	612	454	413	177	272	1078	1667	1556	830	1892	497	0.738055	0.0196906	2.76803	5.09e-24	0.321905	0.3032	2.35188	1.41e-17	unbiased
AGAP000942	72	100	87	58	20	36	75	97	127	33	92	54	-0.480232	0.145446	1.59236	1.21e-07	0.563217	0.0625688	2.63581	7.59e-20	unbiased
AGAP000943	331	333	211	1965	881	1115	406	678	580	472	1029	311	0.265561	0.446313	-0.223841	0.43239	-0.236496	0.435695	-0.725897	0.00629184	unbiased
AGAP000944	1	1	1	19	11	8	0	0	2	0	2	1	-1.1137	0.529243	-2.58597	0.017046	-0.650713	0.688172	-2.12298	0.0504688	unbiased
AGAP000945	29	35	29	222	132	131	33	77	106	40	82	25	0.469706	0.261524	-0.823961	0.00975654	0.344925	0.348096	-0.948742	0.00373769	unbiased
AGAP000946	0	0	0	1	1	0	0	0	0	1	7	0	-0.282333	NA	2.11497	0.251402	-3.6968	0.0659892	-1.29949	0.535082	not_expressed
AGAP000947	249	297	177	545	269	383	235	284	376	85	152	107	-0.348922	0.0825329	-0.825803	3.51e-06	1.16914	8.22e-11	0.692259	3.64e-05	unbiased
AGAP000948	73	93	69	259	139	164	44	77	113	61	125	65	-0.71137	0.00383143	-0.224767	0.31336	-0.31652	0.194716	0.170083	0.449665	unbiased
AGAP000949	95	118	62	346	177	227	99	131	136	142	189	115	-0.231132	0.399327	0.233744	0.26315	-0.497875	0.020332	-0.0329985	0.884501	unbiased
AGAP000950	230	235	151	415	273	331	470	485	466	147	240	155	0.597838	0.0278812	0.0306921	0.910612	1.23212	2.91e-07	0.664971	0.00578279	unbiased
AGAP000951	120	161	117	468	266	299	231	272	316	123	219	99	0.386204	0.0707863	-0.295864	0.116298	0.72807	8.33e-05	0.0460029	0.819032	unbiased
AGAP000952	3223	3785	2602	4912	3092	4293	1261	1429	2362	783	1627	1262	-1.60365	2.57e-12	-0.798421	0.000378499	0.233198	0.361947	1.03843	2.59e-06	Fe_Car_weak
AGAP000953	3479	3592	2735	7876	4439	5710	1241	1548	2260	1022	2074	1588	-1.64411	8.54e-17	-0.97922	4.09e-07	-0.117196	0.617808	0.547691	0.00518464	Fe_Car_weak
AGAP000954	156	215	95	2283	1381	1511	140	257	320	128	275	121	-0.0549301	0.871696	-2.39597	5.56e-33	0.253873	0.290327	-2.08717	4.28e-25	Fe_RT_strong
AGAP000955	8	22	9	0	2	1	32	40	58	15	26	6	1.0859	0.0532472	4.45201	8.39e-08	1.29053	0.0093126	4.65664	2.19e-08	unbiased
AGAP000957	0	0	1	0	0	0	0	1	0	1	0	0	-0.494615	NA	1.60523	NA	-0.268166	NA	1.83168	NA	not_expressed
AGAP000958	337	543	368	621	368	484	294	541	653	220	676	190	-0.448957	0.188186	0.373353	0.209185	0.336551	0.286308	1.15886	2.98e-05	unbiased
AGAP000960	64	64	52	291	128	211	34	59	64	59	92	55	-0.887502	0.00108176	-0.634292	0.0047442	-0.61214	0.0178761	-0.35893	0.123513	unbiased
AGAP000961	51	81	36	495	307	331	73	149	159	88	241	47	0.503584	0.277415	-0.778472	0.0322843	-0.0859233	0.855694	-1.36798	0.0001591	unbiased
AGAP000962	1	7	2	0	1	0	13	29	22	4	1	1	2.00228	0.0282066	2.79841	0.02975	3.00256	0.000617893	3.79869	0.00194337	unbiased
AGAP000963	0	0	0	0	0	0	0	2	1	0	1	1	2.30516	NA	2.61965	0.195885	0.277641	0.909376	0.592123	0.786359	not_expressed
AGAP000964	384	515	394	615	123	261	740	997	990	729	1303	558	0.415817	0.334204	2.40305	5.01e-13	-0.0748926	0.866284	1.91234	1.12e-08	unbiased
AGAP000965	6	21	19	7	3	4	27	106	113	7	8	2	1.61053	0.0118044	1.19273	0.118336	3.47631	3.92e-08	3.05852	4.85e-06	Ma_Car_weak
AGAP000966	7	10	8	6	1	4	23	59	56	3	9	1	1.73001	0.00186692	1.11002	0.137597	3.16644	5.59e-08	2.54645	8.87e-05	Ma_Car_specific
AGAP000967	51	91	63	315	158	177	56	83	82	42	67	48	-0.553171	0.0516177	-1.06188	7.14e-06	0.278031	0.329808	-0.23068	0.346749	unbiased
AGAP000968	22	23	23	29	4	5	57	73	84	31	42	9	0.952068	0.136138	2.12068	0.000229244	1.20387	0.0318134	2.37248	3.62e-05	unbiased
AGAP000969	427	530	385	841	473	526	821	1393	1293	448	888	274	0.704901	0.00656102	0.691793	0.00328429	0.981202	3.03e-05	0.968094	2.89e-05	unbiased
AGAP000970	25	41	30	152	78	80	75	180	134	14	12	1	1.31151	0.00236806	-2.50086	3.82e-08	3.56263	3.41e-15	-0.249741	0.565217	Ma_Car_weak
AGAP000971	38	64	47	77	37	34	58	94	96	42	86	35	0.0576173	0.894743	1.07212	0.000183986	0.430762	0.152794	1.44526	3.56e-07	unbiased
AGAP000973	112	94	60	549	296	442	112	141	182	43	75	40	0.0396862	0.910074	-2.07734	1.17e-19	1.26154	2.12e-07	-0.855489	9.82e-05	Fe_RT_weak
AGAP000974	14	37	40	1	2	4	40	135	122	9	34	9	0.910641	0.172118	3.4574	3.38e-06	2.31538	6.57e-05	4.86214	1.49e-11	unbiased
AGAP000975	130	171	114	324	110	181	137	193	306	102	161	88	-0.0826888	0.820581	0.199757	0.455533	0.618884	0.015752	0.90133	0.00018337	unbiased
AGAP000976	0	1	0	0	1	2	0	3	5	0	4	1	1.76196	NA	1.11085	0.495346	0.455124	0.802957	-0.195979	0.914411	not_expressed
AGAP000977	23	35	14	165	106	100	63	77	68	18	34	29	0.913342	0.0152143	-1.22999	0.000117065	1.16733	0.00049897	-0.975999	0.00281777	Fe_RT_weak
AGAP000978	36	33	12	608	272	342	23	31	53	19	35	14	-0.272596	0.569241	-3.18679	1.5e-22	0.444284	0.275897	-2.46991	8.49e-15	Fe_RT_strong
AGAP000979	38	33	22	128	75	81	46	48	66	23	27	28	0.122787	0.795278	-0.86241	0.00648837	0.793996	0.0192778	-0.191201	0.57172	unbiased
AGAP000981	73	62	53	364	229	233	167	218	303	112	180	118	1.1758	1.08e-07	-0.056501	0.802022	0.520704	0.0110685	-0.711599	0.000697013	Ma_Car_weak
AGAP000982	105	138	80	817	473	544	120	242	277	67	131	35	0.284753	0.40395	-2.07992	8.75e-16	1.26719	3.07e-06	-1.09749	1.75e-05	Fe_RT_weak
AGAP000983	89	109	90	548	453	468	55	99	151	51	78	30	-0.648144	0.0490155	-2.3128	1.11e-16	0.698483	0.0258025	-0.966172	0.000381552	Fe_RT_strong
AGAP000984	52	63	31	82	35	33	35	88	126	4	20	6	0.0429731	0.943348	-1.37865	0.00402586	2.81048	1.64e-09	1.38886	0.000560706	not_expressed
AGAP000985	142	132	110	715	354	424	170	227	254	114	263	71	0.0828991	0.842837	-0.849548	0.00162205	0.431317	0.14626	-0.50113	0.0691004	unbiased
AGAP000986	73	168	115	8	4	17	179	304	467	51	54	42	0.692088	0.140654	3.25961	5.19e-12	2.34966	4.6e-09	4.91718	8.79e-27	unbiased
AGAP000987	137	264	226	6	0	27	128	145	338	46	40	63	-0.752035	0.425295	3.07914	5.22e-05	1.58502	0.041113	5.4162	2.77e-13	unbiased
AGAP000988	1	12	6	1	0	0	48	44	15	7	3	0	1.93325	0.0865748	3.395	0.0105799	3.10133	0.00249338	4.56308	0.000364754	unbiased
AGAP000989	0	4	4	1	0	3	11	11	3	22	19	14	1.02765	0.381713	4.44762	3.98e-06	-1.25028	0.153194	2.16969	0.0456891	unbiased
AGAP000990	2	1	0	0	1	0	7	9	18	0	1	1	2.70051	0.0278601	1.40961	0.371078	3.59484	0.00253847	2.30393	0.113932	not_expressed
AGAP000991	68	82	40	354	207	213	40	50	81	27	72	47	-0.816605	0.0084026	-1.46738	1.83e-08	0.0263646	0.946182	-0.624412	0.0162115	Fe_RT_weak
AGAP000992	12	17	12	0	0	1	20	32	67	0	2	0	0.798098	0.207528	1.37925	0.342432	5.30141	8.29e-08	5.88256	5.73e-08	unbiased
AGAP000994	169	228	126	637	325	353	106	174	272	74	125	64	-0.618282	0.0111044	-1.3562	4.52e-10	0.828012	0.000365136	0.0900966	0.704978	unbiased
AGAP000995	44	46	27	142	67	91	66	81	113	62	108	56	0.480152	0.095094	0.545951	0.0155738	0.00452352	0.986791	0.0703222	0.794001	unbiased
AGAP000996	19	23	13	295	142	156	10	8	8	13	23	9	-1.69877	0.000291431	-2.74502	2.73e-16	-0.938492	0.0473891	-1.98474	7.19e-10	Fe_RT_specific
AGAP000997	117	128	89	222	96	118	78	94	145	52	106	87	-0.755077	0.00798078	0.168995	0.551474	0.142479	0.64872	1.06655	1.73e-05	unbiased
AGAP000998	81	110	80	131	86	112	88	176	248	156	294	130	0.189647	0.561001	1.71073	2.19e-13	-0.405077	0.108478	1.116	4.85e-06	unbiased
AGAP000999	382	516	317	1864	1069	1386	234	422	536	102	279	80	-0.724959	0.00772113	-2.37276	7.07e-23	1.2224	1.27e-06	-0.425407	0.0854408	unbiased
AGAP001002	15	31	12	5	4	6	1	6	4	1	3	0	-2.98875	3.38e-05	-0.915194	0.34752	1.14946	0.271071	3.22302	2.35e-07	not_expressed
AGAP001004	13	32	10	635	416	360	6	20	50	47	119	33	-0.265279	0.7325	-1.96057	3.67e-05	-1.58634	0.00250169	-3.28163	3.78e-11	Fe_RT_weak
AGAP001005	0	0	0	0	0	0	1	7	3	0	3	1	3.93676	NA	3.42063	0.0599004	1.24977	0.439347	0.733645	0.737872	not_expressed
AGAP001006	1	0	0	0	0	0	2	7	2	0	0	0	2.52601	NA	0.472275	0.834089	4.35801	0.0215824	2.30428	0.247502	unbiased
AGAP001007	97	88	61	261	155	150	75	87	93	30	71	58	-0.593527	0.0718638	-0.870081	0.00225527	0.495428	0.116879	0.218874	0.458972	unbiased
AGAP001008	0	0	0	0	0	0	0	0	0	0	0	0	NA	NA	NA	NA	NA	NA	NA	NA	not_expressed
AGAP001009	9	9	6	6	0	1	8	14	17	3	3	2	0.0124733	0.988226	1.16105	0.201584	1.97958	0.00819398	3.12815	3.7e-05	not_expressed
AGAP001010	118	95	68	46	31	58	86	145	222	109	187	87	-0.0368568	0.936307	2.38783	1.52e-14	0.00899674	0.98123	2.43369	7.43e-15	unbiased
AGAP001011	313	442	299	39	58	129	166	321	336	78	216	72	-1.04195	0.0446658	1.40785	0.00245568	1.01993	0.0343004	3.46974	6.82e-15	Fe_Car_weak
AGAP001012	1	1	0	0	0	0	0	0	3	0	1	0	-0.123532	NA	1.55576	0.464519	0.978257	0.669459	2.65755	0.186753	not_expressed
AGAP001013	0	0	0	0	0	0	1	3	2	0	3	1	3.24151	NA	3.47514	0.0595199	0.472233	0.80055	0.705863	0.748155	not_expressed
AGAP001014	2	4	4	3	0	1	5	3	9	9	16	4	0.0818803	0.947046	3.56001	8.63e-05	-0.900166	0.263238	2.57796	0.00851483	not_expressed
AGAP001015	63	122	93	484	324	324	89	220	264	53	174	29	0.29462	0.610913	-1.36183	0.00132866	1.04145	0.0198188	-0.615004	0.159537	unbiased
AGAP001018	1	3	0	1	0	3	17	8	23	1	0	3	2.85338	0.020909	0.968702	0.461589	3.06642	0.00539377	1.18174	0.365112	not_expressed
AGAP001019	67	82	13	2240	1302	1505	5	22	46	28	187	36	-1.81863	0.0148699	-3.52102	1.82e-08	-1.83367	0.00749439	-3.53606	1.65e-08	Fe_RT_strong
AGAP001021	334	444	362	253	91	149	497	865	1085	229	405	182	0.380557	0.146602	1.69435	3.86e-14	1.36572	4.21e-10	2.67951	3.24e-34	unbiased
AGAP001022	8	4	8	3	3	1	11	16	19	4	6	2	0.47831	0.548148	1.60561	0.0527001	1.70279	0.0124802	2.83009	0.000174311	not_expressed
AGAP001023	2340	3861	2586	835	449	712	5587	9021	6612	2907	5681	2776	0.63051	0.0122078	3.41543	1.54e-55	0.750743	0.00107507	3.53566	2.55e-59	unbiased
AGAP001024	0	0	0	1	0	0	0	0	3	0	1	1	1.95829	NA	1.33078	0.527294	0.164439	0.949325	-0.46307	0.829526	not_expressed
AGAP001025	48	50	55	10	13	9	73	92	97	54	104	37	0.0923276	0.853251	3.42592	1.5e-18	0.286325	0.434909	3.61992	2.39e-20	unbiased
AGAP001026	43	71	47	131	105	146	54	80	77	45	79	69	-0.265866	0.508864	-0.0535649	0.871508	-0.0961056	0.79995	0.116196	0.726713	unbiased
AGAP001027	246	181	148	243	178	205	233	267	306	82	212	96	-0.172683	0.636234	0.175664	0.55677	0.924541	0.000773615	1.27289	1.12e-06	unbiased
AGAP001028	88	101	81	334	155	154	84	129	160	50	105	42	-0.230094	0.465042	-0.757333	0.00183647	0.737731	0.00392752	0.210492	0.400342	unbiased
AGAP001029	59	100	97	136	57	70	128	271	319	63	159	28	0.728298	0.141425	0.783231	0.0725085	1.38003	0.00120242	1.43496	0.000601225	unbiased
AGAP001030	66	66	48	16	26	47	53	62	83	27	122	29	-0.522532	0.423779	1.63484	0.00159127	0.126234	0.847234	2.28361	6.68e-06	unbiased
AGAP001031	26	27	21	135	88	103	10	24	34	10	22	14	-0.82994	0.0367497	-1.88722	9.95e-09	0.326765	0.44769	-0.730514	0.0175269	Fe_RT_weak
AGAP001032	710	1632	772	1532	797	1087	1259	1752	1303	354	629	217	-0.110545	0.813173	-0.593211	0.0671012	1.72391	3.5e-08	1.24124	5.74e-05	unbiased
AGAP001033	49	42	43	2	1	0	70	90	134	4	3	5	0.42169	0.310168	2.64574	0.00276543	4.30776	2.01e-17	6.53181	1.92e-17	unbiased
AGAP001034	38	35	46	1	0	3	46	78	69	1	8	1	-0.0184608	0.975927	1.97798	0.0273383	4.05291	1.6e-11	6.04935	3.58e-16	unbiased
AGAP001035	91	108	71	783	499	508	166	293	306	86	139	50	0.8144	0.000619275	-1.78355	1.78e-17	1.27619	5.07e-09	-1.32176	3.22e-10	Fe_RT_weak
AGAP001036	154	195	121	283	169	199	124	155	178	81	143	88	-0.696001	7.79e-05	-0.116669	0.52813	0.3553	0.0526403	0.934631	2.33e-09	unbiased
AGAP001037	293	336	247	877	609	747	209	289	360	135	353	117	-0.710338	0.00363741	-1.04606	1.61e-06	0.37901	0.119155	0.0432895	0.856786	unbiased
AGAP001038	1	10	11	9	16	27	23	37	37	11	19	2	1.38387	0.124932	0.0416078	0.960425	1.42412	0.0734431	0.0818598	0.922627	unbiased
AGAP001039	8	52	6	97	473	40	8	10	23	17121	27999	5225	-1.16344	0.314688	6.62515	1.09e-14	-9.89466	1.02e-29	-2.10607	0.019906	Ma_RT_strong
AGAP001040	49	49	26	702	375	480	40	40	48	21	45	21	-0.594851	0.061048	-3.21527	6.18e-38	0.391942	0.219112	-2.22848	2.01e-21	Fe_RT_strong
AGAP001041	136	170	110	553	241	311	124	155	238	92	156	98	-0.365508	0.123083	-0.683957	0.000478035	0.356852	0.101609	0.0384027	0.856838	unbiased
AGAP001042	17	20	8	90	45	51	18	18	25	18	16	12	-0.200981	0.737815	-0.997038	0.00971698	0.170414	0.738628	-0.625643	0.11393	unbiased
AGAP001043	253	454	282	703	343	383	467	980	1069	213	504	99	0.639742	0.133363	0.0470783	0.907612	1.48528	4.12e-05	0.892616	0.0132628	unbiased
AGAP001044	5	6	7	26	8	29	4	4	10	2	4	1	-0.69869	0.451269	-2.13504	0.00570114	1.09286	0.226566	-0.343489	0.633315	unbiased
AGAP001045	194	199	112	1619	870	868	40	57	101	54	124	60	-2.03626	1.51e-14	-2.87792	1.39e-32	-0.465062	0.114189	-1.30672	2.44e-08	Fe_RT_strong
AGAP001046	69	93	61	319	227	246	131	137	193	104	229	76	0.395414	0.215342	-0.0975538	0.731033	0.051224	0.87813	-0.441743	0.0933691	unbiased
AGAP001047	68	64	55	256	176	170	190	221	185	24	24	14	1.03456	0.00171684	-2.29963	4.39e-12	3.06249	2.62e-20	-0.271693	0.399441	Ma_Car_weak
AGAP001048	5	2	3	0	0	1	15	14	13	8	7	4	1.40823	0.102151	4.35547	0.000146378	0.943879	0.194908	3.89112	0.00100689	unbiased
AGAP001050	86	130	73	232	100	126	107	137	128	67	119	46	-0.26204	0.423413	-0.0258078	0.927588	0.533063	0.0506741	0.769295	0.00206935	unbiased
AGAP001051	51	68	52	91	69	55	75	121	105	39	62	33	0.146157	0.687196	0.243278	0.40437	0.968575	0.000327998	1.0657	3.93e-05	unbiased
AGAP001052	17	13	8	4	6	4	47	79	42	48	73	18	1.4918	0.0116827	4.04811	7.16e-12	0.152043	0.805529	2.70834	1.62e-05	unbiased
AGAP001053	1912	1332	953	502	130	237	7193	8417	4668	4689	6362	3526	1.67056	0.000188729	5.08101	2.7e-36	0.345214	0.472281	3.75567	2.52e-20	Ma_Ubi_weak
AGAP001054	0	0	0	0	0	0	0	0	0	0	0	0	NA	NA	NA	NA	NA	NA	NA	NA	not_expressed
AGAP001056	212	289	137	1232	710	698	410	454	285	340	441	495	0.299798	0.542749	-0.00732647	0.985562	-0.3448	0.410165	-0.651925	0.0831114	unbiased
AGAP001057	63	72	28	706	475	428	75	100	74	103	172	127	0.0113019	0.980629	-1.03955	0.000296808	-0.870985	0.00526837	-1.92184	8.14e-11	Fe_RT_weak
AGAP001058	26	24	12	135	66	69	51	59	43	24	49	29	0.689747	0.117054	-0.437491	0.227868	0.443763	0.256865	-0.683475	0.0653777	unbiased
AGAP001061	23	9	7	313	137	188	3	28	26	2	17	0	-0.253706	0.828344	-4.16214	9.53e-08	1.43462	0.102246	-2.47381	0.000887658	Fe_RT_specific
AGAP001064	151	190	95	493	265	304	288	341	205	277	396	234	0.370679	0.358724	0.747862	0.0180184	-0.258619	0.473183	0.118564	0.738183	unbiased
AGAP001065	2172	4225	2629	1279	779	1228	1083	1309	1861	302	365	229	-1.736	1.27e-11	-0.900266	0.000424753	1.9929	2.04e-15	2.82863	2.67e-31	Fe_Car_weak
AGAP001067	0	1	3	2	2	4	3	5	5	6	3	4	0.902536	0.505186	1.61092	0.089207	-0.302073	0.784119	0.406307	0.732196	not_expressed
AGAP001068	172	189	165	412	206	282	382	446	518	154	218	158	0.688673	0.0012354	0.229577	0.276975	1.13069	6.18e-09	0.671595	0.000650281	unbiased
AGAP001069	196	190	124	556	194	248	173	242	254	244	361	110	-0.266237	0.548148	0.508649	0.136758	-0.257034	0.502022	0.517852	0.12747	unbiased
AGAP001070	80	113	81	310	191	171	134	216	238	82	135	40	0.415198	0.212797	-0.475865	0.0928149	1.01309	0.000286355	0.122031	0.688917	unbiased
AGAP001072	0	2	6	2	0	5	3	1	2	6	3	2	-0.987443	0.543221	1.53625	0.218743	-0.98336	0.476926	1.54034	0.22088	not_expressed
AGAP001073	109	127	69	931	481	567	143	202	175	83	159	86	0.131904	0.643202	-1.6384	9.96e-18	0.495211	0.0212217	-1.27509	3.64e-11	Fe_RT_weak
AGAP001076	2250	2997	1634	247	31	251	4610	6122	7168	1011	1190	362	0.723071	0.285153	3.2395	1.37e-09	2.55668	2.58e-06	5.07312	7.54e-22	unbiased
AGAP001078	3	0	3	1	1	0	4	1	5	0	2	2	0.0256166	0.988009	1.56995	0.287049	1.07491	0.450477	2.61924	0.0551536	not_expressed
AGAP001079	0	1	0	1	0	2	2	2	1	0	0	0	1.53197	NA	-1.85608	0.341484	3.19798	0.0982701	-0.190074	0.91914	not_expressed
AGAP001081	93	98	94	233	183	211	136	214	286	118	238	75	0.431633	0.203235	0.301528	0.302774	0.391011	0.193617	0.260907	0.377478	unbiased
AGAP001082	3538	6511	3351	3155	1495	2268	3732	4589	5501	1872	2805	2206	-0.576668	0.0160846	0.999986	2.05e-06	0.774136	0.000364557	2.35079	3.32e-30	unbiased
AGAP001083	75	122	91	203	119	132	170	230	214	85	143	60	0.440307	0.1108	0.270194	0.285315	0.929774	8.94e-05	0.759661	0.0012552	unbiased
AGAP001084	2	6	1	1	0	3	3	2	15	1	2	2	0.443395	0.768467	1.13017	0.380266	1.5551	0.190361	2.24188	0.0555096	not_expressed
AGAP001085	0	1	0	0	0	0	0	0	0	0	0	0	-1.49414	NA	0.282971	NA	-0.0698007	NA	1.70731	NA	not_expressed
AGAP001087	0	6	8	0	1	0	0	1	3	2	3	4	-2.38992	0.105022	3.22542	0.0239057	-1.38062	0.335674	4.23471	0.00215826	unbiased
AGAP001088	1	1	2	0	1	1	0	4	4	2	0	1	0.16164	NA	1.30104	0.397423	0.822192	0.59869	1.9616	0.180434	not_expressed
AGAP001089	0	2	0	0	1	0	0	0	1	0	0	0	-0.945796	NA	-0.852126	NA	0.971306	NA	1.06498	NA	not_expressed
AGAP001090	173	344	235	377	205	194	312	625	558	113	322	74	0.30344	0.507256	0.225013	0.561669	1.44999	3.86e-05	1.37156	6.56e-05	unbiased
AGAP001091	84	123	64	695	370	448	96	153	149	69	117	22	-0.0920591	0.864181	-1.95446	6.37e-09	0.792878	0.0314024	-1.06952	0.00150789	Fe_RT_weak
AGAP001092	68	80	49	372	209	214	44	86	77	55	49	48	-0.602875	0.0749778	-1.34803	1.1e-06	0.152816	0.668491	-0.592342	0.0337654	Fe_RT_weak
AGAP001093	181	289	211	581	245	340	193	332	418	135	359	66	-0.236703	0.635494	-0.204256	0.61526	0.646803	0.0981612	0.67925	0.0656667	unbiased
AGAP001094	15	19	16	6	4	2	59	77	99	7	29	6	1.54154	0.000368114	2.57827	7.06e-06	2.35565	1.35e-08	3.39238	1.08e-09	Ma_Car_weak
AGAP001096	12	23	16	0	1	2	31	33	52	11	9	7	0.519042	0.348912	3.78325	6.65e-06	1.83918	0.000141601	5.10339	2.96e-10	unbiased
AGAP001097	8	11	6	2	0	4	36	49	41	18	8	1	1.66568	0.0479838	2.99535	0.000735189	1.89604	0.0119602	3.22571	0.000275113	Ma_Car_weak
AGAP001098	10	16	11	34	19	29	31	47	44	17	16	13	1.05004	0.0168388	0.147659	0.738437	1.16238	0.00249482	0.259993	0.55494	Ma_Car_weak
AGAP001099	144	239	134	1949	1018	1188	245	358	408	472	658	350	0.309851	0.175566	-0.510718	0.00394614	-0.76878	2.66e-05	-1.58935	6.34e-19	unbiased
AGAP001100	20	24	28	2	3	3	57	108	83	7	4	3	1.07441	0.0193234	1.67667	0.021586	3.84372	2.47e-13	4.44597	4.79e-13	Ma_Car_weak
AGAP001101	26	74	37	19	7	5	98	106	119	194	234	278	0.633603	0.217973	5.51579	4.63e-33	-1.37542	0.000839168	3.50677	2.31e-13	Ma_RT_specific
AGAP001102	146	228	140	700	314	381	337	483	444	197	380	118	0.656331	0.0282867	-0.0800402	0.791391	0.737665	0.00645318	0.00129383	0.996839	unbiased
AGAP001103	63	80	64	378	155	198	124	152	163	257	309	259	0.424411	0.186976	1.22701	3.62e-07	-1.14917	4.37e-06	-0.346569	0.204418	Ma_RT_weak
AGAP001104	28	33	5	1649	918	934	28	30	24	97	136	94	-0.252681	0.668673	-2.41041	1.93e-12	-2.15846	1.96e-08	-4.31618	1.58e-30	Fe_RT_strong
AGAP001105	1	0	0	0	0	0	0	0	0	0	0	0	-1.5972	NA	0.279338	NA	-0.0698007	NA	1.80674	NA	not_expressed
AGAP001106	40	62	56	7	5	9	65	151	181	20	33	7	0.574717	0.224602	2.33922	4.93e-06	2.48402	1.92e-09	4.24853	7e-19	unbiased
AGAP001107	162	358	180	295	205	269	487	650	438	293	512	271	0.590134	0.0968732	1.38445	3.63e-06	0.413164	0.211269	1.20748	6.04e-05	unbiased
AGAP001108	109	112	81	442	241	308	103	110	137	159	204	218	-0.436515	0.191026	0.258261	0.354838	-0.981134	0.000327789	-0.286358	0.30878	unbiased
AGAP001109	124	141	98	752	464	502	142	245	262	509	808	301	0.148227	0.647306	0.825699	0.000137485	-1.50686	7.56e-12	-0.829387	0.000258229	unbiased
AGAP001110	52	71	61	819	459	470	102	154	170	128	265	148	0.524354	0.0258913	-0.751337	1.46e-05	-0.533784	0.00581181	-1.80947	2.43e-21	unbiased
AGAP001111	317	349	262	253	210	324	389	528	587	663	1308	716	0.0259221	0.939758	2.63669	9.37e-34	-1.00968	6.54e-06	1.60109	7.42e-13	Ma_RT_strong
AGAP001112	2	10	6	2	1	1	4	8	9	1126	1637	1614	-0.446082	0.56786	10.7486	3.38e-53	-7.91365	5.27e-70	3.28103	3.62e-05	Ma_RT_specific
AGAP001113	57	86	101	10	8	10	148	250	283	124	200	84	0.741383	0.0435361	4.70825	8.78e-32	0.531223	0.117933	4.49809	1.36e-28	unbiased
AGAP001114	0	0	1	0	0	0	0	1	0	0	1	2	-0.536886	NA	2.96128	0.137317	-1.35932	0.534842	2.13885	0.29614	not_expressed
AGAP001115	0	6	3	0	0	0	1	0	10	1	1	1	-0.423832	0.839786	2.87812	0.106663	1.26084	0.450521	4.56279	0.00638428	not_expressed
AGAP001116	230	415	212	10	1	18	188	212	283	46	29	21	-0.937073	0.093925	2.71603	9.24e-07	2.49773	4.77e-07	6.15084	1.22e-31	unbiased
AGAP001117	8	32	14	0	0	0	12	9	8	16	17	11	-1.41621	0.0461407	6.3404	9.01e-07	-0.758005	0.275697	6.99861	4.68e-08	Fe_Car_specific
AGAP001118	8	13	12	2	0	3	14	18	24	3	15	0	0.0726255	0.943348	2.42264	0.0081128	1.56656	0.0396471	3.91658	4.74e-06	not_expressed
AGAP001119	0	0	0	0	0	0	0	0	0	0	0	0	NA	NA	NA	NA	NA	NA	NA	NA	not_expressed
AGAP001120	0	0	0	0	0	0	0	0	0	1	2	4	-0.29731	NA	4.65185	0.0142845	-4.31862	0.0296271	0.630539	0.774041	not_expressed
AGAP001121	0	0	0	0	0	0	0	0	0	0	0	0	NA	NA	NA	NA	NA	NA	NA	NA	not_expressed
AGAP001122	0	0	0	0	0	0	0	0	0	0	0	0	NA	NA	NA	NA	NA	NA	NA	NA	not_expressed
AGAP001123	0	0	0	0	0	0	0	0	0	0	0	0	NA	NA	NA	NA	NA	NA	NA	NA	not_expressed
AGAP001124	164	296	101	10	3	22	10	3	7	0	2	1	-5.19426	9.38e-15	-2.32205	0.0164126	2.3395	0.0217994	5.21171	2.69e-17	Fe_Car_specific
AGAP001125	0	0	1	0	0	0	0	0	0	0	0	0	-1.68859	NA	0.276093	NA	-0.0698007	NA	1.89489	NA	not_expressed
AGAP001126	2	5	3	0	0	0	20	28	39	6	4	4	2.42163	0.000573248	4.90548	0.000310376	2.34331	0.000110705	4.82717	0.000442357	Ma_Car_specific
AGAP001127	353	531	317	19	6	42	95	103	147	12	13	6	-2.41226	2.87e-07	-0.149435	0.812035	3.20209	5e-10	5.46492	2.58e-32	Fe_Car_strong
AGAP001128	0	0	0	0	0	0	0	0	0	0	0	0	NA	NA	NA	NA	NA	NA	NA	NA	not_expressed
AGAP001129	0	0	0	0	0	0	0	0	0	0	0	0	NA	NA	NA	NA	NA	NA	NA	NA	not_expressed
AGAP001130	95	134	24	4164	2264	2320	38	74	90	303	519	282	-0.944998	0.0358373	-2.01136	2.87e-08	-2.66157	2.03e-12	-3.72793	2.84e-24	Fe_RT_weak
AGAP001132	29	41	15	157	82	117	23	31	37	30	34	29	-0.543554	0.176217	-0.936432	0.00169649	-0.275599	0.466555	-0.668476	0.029232	unbiased
AGAP001133	150	218	157	594	338	407	166	268	325	184	374	140	-0.160529	0.540653	-0.0396139	0.854965	-0.0530217	0.831534	0.0678932	0.752623	unbiased
AGAP001134	164	190	100	601	409	473	137	139	181	69	140	102	-0.615018	0.0222186	-1.31847	1.14e-08	0.371734	0.160502	-0.331713	0.164743	unbiased
AGAP001135	43	38	6	1256	800	844	2	9	8	62	113	70	-2.77222	1.37e-06	-2.602	1.03e-10	-3.83706	1.91e-13	-3.66683	2.14e-18	Fe_RT_strong
AGAP001136	145	141	104	492	305	309	163	216	265	213	240	140	0.0462785	0.899164	0.0833665	0.749031	-0.122864	0.656608	-0.0857758	0.740846	unbiased
AGAP001137	2	1	0	2	2	1	0	3	5	4	5	4	0.593115	0.721378	2.17258	0.0365523	-0.980758	0.374179	0.598705	0.653098	not_expressed
AGAP001138	4665	4112	3135	1920	903	1268	13492	15165	14453	1835	2795	1859	1.22253	1.82e-07	1.65764	5.59e-14	2.54989	1.17e-31	2.985	7.37e-43	Ma_Car_weak
AGAP001139	117	113	70	706	364	389	100	106	117	62	106	94	-0.522038	0.103758	-1.46763	1.48e-08	0.100102	0.771276	-0.845489	0.00118042	Fe_RT_weak
AGAP001140	189	312	164	2759	1273	1396	238	353	417	359	701	319	-0.0557518	0.857328	-1.02147	4.36e-08	-0.629069	0.00166682	-1.59479	3.04e-17	Fe_RT_weak
AGAP001141	232	255	137	2949	1597	1891	186	264	380	290	455	295	-0.266243	0.232123	-1.65241	8.29e-24	-0.565701	0.00185895	-1.95187	3.31e-31	Fe_RT_weak
AGAP001143	160	179	149	495	245	332	273	350	577	144	238	202	0.584844	0.0247184	0.124579	0.62793	0.772087	0.00093676	0.311823	0.19384	unbiased
AGAP001144	57	78	56	260	158	175	135	166	166	119	184	119	0.640023	0.00665784	0.46627	0.0176404	-0.0475546	0.852311	-0.221308	0.316756	unbiased
AGAP001145	25	28	15	372	233	246	17	17	23	23	34	34	-0.901817	0.0255024	-2.24115	4.97e-16	-0.897296	0.0121507	-2.23663	1.42e-14	Fe_RT_weak
AGAP001146	93	79	49	371	292	402	13	25	39	65	106	83	-2.21202	4.75e-10	-1.13454	0.000138846	-1.97662	7.19e-09	-0.899142	0.00284354	Fe_RT_weak
AGAP001147	9	11	7	0	1	1	28	29	37	8	4	9	1.14869	0.065252	3.90794	4.83e-05	1.85865	0.00100534	4.6179	1.03e-06	unbiased
AGAP001148	292	384	266	1993	1229	1506	287	458	577	217	522	209	-0.204826	0.357759	-1.44011	4.46e-18	0.313836	0.0950592	-0.921449	3.45e-08	Fe_RT_weak
AGAP001149	48	62	35	366	194	245	24	21	41	31	59	42	-1.40918	2.77e-06	-1.64165	4.88e-12	-0.822688	0.00589233	-1.05516	7.78e-06	Fe_RT_weak
AGAP001150	57	79	60	298	210	212	65	90	84	134	236	190	-0.372928	0.235732	0.587028	0.0102743	-1.43762	1.55e-09	-0.477659	0.0531313	unbiased
AGAP001151	490	979	485	7997	3921	4375	1262	1662	1010	1475	2705	1448	0.443696	0.234645	-0.567577	0.0676511	-0.630735	0.0490745	-1.64201	3.02e-08	unbiased
AGAP001152	63	80	64	140	94	119	66	76	101	76	111	96	-0.439848	0.145039	0.64626	0.0075822	-0.454345	0.0848418	0.631762	0.0105143	unbiased
AGAP001153	489	521	427	266	180	208	787	1018	1001	141	224	153	0.306035	0.15419	0.608616	0.00178126	2.2396	3.09e-35	2.54218	1.5e-45	unbiased
AGAP001154	53	49	27	383	226	267	58	42	79	60	119	91	-0.160794	0.733037	-0.736796	0.0139938	-0.775346	0.017737	-1.35135	1.03e-05	unbiased
AGAP001156	24	31	12	429	298	339	29	30	32	103	175	141	-0.18543	0.700159	-0.395185	0.128858	-2.39765	4.88e-17	-2.60741	6.03e-19	unbiased
AGAP001157	1314	1869	1394	2637	1878	2067	2266	3963	3946	3103	6478	2385	0.460424	0.0516537	1.71361	6.18e-18	-0.387362	0.0760501	0.865824	1.88e-05	unbiased
AGAP001158	10	15	7	237	114	143	8	9	10	23	40	30	-0.889078	0.0945731	-1.42317	3.78e-07	-1.97064	7.95e-07	-2.50473	5.53e-13	Fe_RT_weak
AGAP001159	36	53	39	366	234	206	39	53	85	85	169	75	-0.226163	0.540451	-0.381549	0.118404	-1.08245	2.9e-05	-1.23783	8.95e-07	unbiased
AGAP001160	18	30	34	7	6	20	43	62	88	194	538	186	0.497996	0.391405	5.50766	1.96e-32	-2.35227	2.51e-08	2.6574	8.15e-08	Ma_RT_specific
AGAP001161	16675	11809	12612	76	6	6	4319	23195	53782	252	148	341	0.0832488	0.94561	4.24742	1.06e-07	5.93862	3.71e-14	10.1028	3.69e-38	unbiased
AGAP001162	5	12	6	0	0	0	7	14	21	1	2	0	0.181172	0.856421	2.86975	0.0688603	3.41468	0.000481208	6.10326	1e-05	not_expressed
AGAP001165	1	2	2	7	8	15	10	10	22	832	1307	1048	2.20195	0.0060708	7.60489	2.12e-81	-6.4589	1.95e-65	-1.05597	0.165966	Ma_RT_specific
AGAP001166	14	18	7	412	220	228	10	11	16	21	45	29	-0.727513	0.138926	-2.21418	2.4e-16	-1.54172	3.43e-05	-3.02839	6.56e-21	Fe_RT_weak
AGAP001167	19	19	13	327	195	223	14	21	19	31	55	41	-0.583807	0.169152	-1.59424	1.32e-11	-1.43524	4.78e-06	-2.44567	4.43e-18	Fe_RT_weak
AGAP001168	89	146	86	817	458	553	144	194	220	92	173	88	0.14088	0.540698	-1.43408	7.35e-20	0.475081	0.00735557	-1.09987	5.1e-12	Fe_RT_weak
AGAP001169	0	7	0	1	4	2	2	1	0	1	6	3	-1.30405	0.476533	1.04992	0.458127	-1.43645	0.352546	0.917519	0.526579	not_expressed
AGAP001170	0	0	1	0	0	0	0	0	0	1	1	0	-1.85758	NA	2.42357	NA	-2.1652	NA	2.11595	NA	not_expressed
AGAP001171	0	2	1	0	2	3	0	1	0	3	6	5	-1.70758	0.376534	2.1284	0.0677701	-3.38227	0.020332	0.453709	0.753171	not_expressed
AGAP001172	1	1	0	2	0	3	0	1	1	4	6	5	-0.579439	0.783499	2.41624	0.0231319	-2.88046	0.0235728	0.115212	0.935579	not_expressed
AGAP001173	3	2	1	2	2	3	0	0	1	7	9	2	-2.65673	0.0939089	2.13383	0.0242593	-3.72641	0.0049763	1.06416	0.328663	not_expressed
AGAP001174	302	503	263	1142	688	679	756	934	1076	799	1418	742	0.743933	8.97e-05	1.17115	4.94e-12	-0.269568	0.153514	0.15765	0.406218	unbiased
AGAP001175	5	3	1	0	3	0	4	14	14	5	11	7	1.07661	0.283931	3.46626	0.000314651	0.220138	0.808732	2.60979	0.0115467	not_expressed
AGAP001176	0	0	0	0	0	0	0	0	0	1	2	3	-0.29639	NA	4.42742	0.0209218	-4.09829	0.0409002	0.625522	0.775681	not_expressed
AGAP001177	0	1	1	9	0	4	0	3	5	23	29	39	1.00351	0.520697	3.83321	8.27e-07	-3.75124	1.01e-05	-0.921538	0.453011	Ma_RT_specific
AGAP001179	79	110	67	713	402	478	71	121	145	242	390	332	-0.286728	0.310565	0.265094	0.196494	-1.77546	3.8e-18	-1.22364	3.41e-09	unbiased
AGAP001181	117	201	124	8	5	20	275	335	341	81	121	75	0.47776	0.179826	3.95201	1.84e-25	1.58394	1.16e-07	5.05819	7.78e-42	unbiased
AGAP001182	734	411	547	3	197	101	26	23	28	1	165	0	-4.2879	0.00966906	-0.580935	0.73213	-0.602042	0.74369	3.10493	0.038947	Fe_Car_strong
AGAP001183	1	1	0	0	0	0	2	2	3	1	0	0	1.12247	NA	1.98669	0.312382	2.15874	0.207776	3.02296	0.100852	not_expressed
AGAP001184	2	2	4	0	0	0	13	10	11	0	0	0	1.44555	0.176321	0.599212	0.783247	5.76283	0.00034126	4.91649	0.00151741	unbiased
AGAP001185	177	124	116	2	1	4	312	483	606	21	45	22	1.02684	0.00037885	4.35695	8.34e-14	3.7756	1.81e-37	7.10571	7.35e-37	Ma_Car_weak
AGAP001187	48	65	45	37	24	39	91	279	307	32	86	17	1.33433	0.00281495	1.22377	0.00510161	2.13667	2e-07	2.0261	1.54e-06	Ma_Car_weak
AGAP001189	226	242	199	30	3	21	453	591	709	104	133	139	0.709008	0.0594719	3.84177	1.37e-24	1.9368	2.84e-09	5.06957	1.05e-42	unbiased
AGAP001190	90	86	44	1	8	31	5	3	1	0	8	1	-4.76947	8.91e-06	-1.45105	0.18963	0.169447	0.90897	3.48786	0.000222517	Fe_Car_specific
AGAP001191	0	0	0	0	0	0	0	0	0	0	0	0	NA	NA	NA	NA	NA	NA	NA	NA	not_expressed
AGAP001192	820	537	530	1	216	278	236	270	225	7	279	0	-1.69275	0.378178	-0.454199	0.793537	1.36977	0.425945	2.60832	0.0901175	unbiased
AGAP001193	887	837	881	2	392	198	172	197	222	3	253	2	-2.43979	0.145411	-0.871077	0.574503	1.26003	0.432978	2.82875	0.0466827	unbiased
AGAP001194	144	386	323	12	12	11	726	2074	2271	64	202	25	1.77507	0.00230422	3.65971	1.81e-10	3.95156	6.66e-14	5.8362	3.16e-25	Ma_Car_weak
AGAP001195	123	144	89	987	651	782	114	151	220	157	276	143	-0.232931	0.306964	-1.15164	4.17e-13	-0.45344	0.0127781	-1.37214	9.28e-17	Fe_RT_weak
AGAP001196	11	16	4	165	86	86	24	20	31	38	50	50	0.643557	0.243958	-0.260073	0.492834	-1.10835	0.00461253	-2.01198	1.15e-06	unbiased
AGAP001197	19	15	13	105	53	75	10	20	26	9	35	10	-0.455492	0.406774	-1.22258	0.00141656	-0.0975931	0.859904	-0.864678	0.0267951	Fe_RT_weak
AGAP001198	2408	21	29	5	23	132	4	10	4	2	86	3	-6.42671	6.72e-05	-0.362696	0.833775	-1.59796	0.349629	4.46605	0.00283702	Fe_Car_specific
AGAP001199	9768	2891	1031	41	627	3920	9	28	19	5	297	3	-7.29161	7.63e-07	-3.03987	0.0340887	-1.75453	0.263238	2.49722	0.0822923	Fe_Ubi_strong
AGAP001200	1481	2369	1965	275	147	503	5427	6660	5555	774	1296	323	0.954514	0.0804538	2.19034	2.31e-06	2.75462	2.82e-09	3.99045	1.84e-18	unbiased
AGAP001201	9	7	11	0	0	0	42	61	85	4	9	2	2.06885	3.02e-05	4.78029	0.000256872	3.42781	9.83e-11	6.13925	1.37e-06	Ma_Car_weak
AGAP001202	2	14	3	3	2	28	10	14	8	7	35	15	0.228434	0.88111	1.44082	0.135097	-0.814372	0.444565	0.398014	0.71248	unbiased
AGAP001203	2	2	2	1	0	2	5	8	4	1	2	0	0.834516	0.515428	0.801	0.561356	2.21251	0.0556162	2.179	0.0634541	not_expressed
AGAP001205	335	291	318	1	125	119	190	291	308	3	110	3	-0.872421	0.615194	-0.72401	0.612145	2.62646	0.0525369	2.77488	0.0312257	unbiased
AGAP001206	5	6	6	0	0	0	3	5	4	0	2	0	-1.15058	0.268987	2.47038	0.149289	2.24716	0.0738646	5.86812	6.13e-05	not_expressed
AGAP001207	23	63	35	76	52	57	36	41	45	109	128	152	-0.602906	0.208592	2.07578	7.54e-09	-1.92677	2.59e-07	0.751913	0.0547579	Ma_RT_weak
AGAP001208	306	544	399	420	268	392	581	771	781	265	509	238	0.119931	0.707542	0.800394	0.000412785	0.920717	5.28e-05	1.60118	3.57e-13	unbiased
AGAP001209	213	291	188	446	277	314	264	538	626	589	1250	530	0.335675	0.14794	2.07707	4.52e-30	-0.925623	7.87e-07	0.815769	2.2e-05	Ma_RT_weak
AGAP001211	256	229	170	1267	732	800	451	642	610	227	383	189	0.714526	0.000409461	-0.867517	1.82e-06	0.915209	8.66e-07	-0.666834	0.000292718	unbiased
AGAP001212	366	248	299	7	20	52	195	254	280	28	53	20	-1.01008	0.130185	1.08828	0.0769012	2.64898	5.08e-06	4.74734	2.92e-17	unbiased
AGAP001213	183	382	113	36	8	21	409	612	531	173	344	155	0.616355	0.136647	4.29275	1.54e-29	1.05435	0.00317004	4.73074	1.25e-35	unbiased
AGAP001214	18	9	12	307	169	175	24	46	60	21	26	24	0.995544	0.0220198	-2.18393	9.62e-12	0.589131	0.119272	-2.59034	2.79e-13	Fe_RT_weak
AGAP001215	30	39	16	285	173	172	43	55	61	47	64	47	0.256344	0.502694	-1.01933	2.69e-05	-0.211671	0.493874	-1.48734	1.78e-08	Fe_RT_weak
AGAP001217	89	118	85	470	288	333	113	130	232	105	180	111	0.0109456	0.972628	-0.516807	0.0108812	0.0373919	0.893804	-0.490361	0.0178495	unbiased
AGAP001218	5162	5374	3810	15933	10559	12234	4643	6935	12243	3336	5529	3821	0.00119228	0.996373	-0.660257	0.00182211	0.62868	0.00396017	-0.0327687	0.888588	unbiased
AGAP001219	230	251	193	729	454	599	244	309	558	152	253	217	0.00627284	0.985955	-0.545995	0.026442	0.560311	0.0287784	0.00804292	0.976561	unbiased
AGAP001220	42	27	19	323	159	198	29	51	55	25	55	22	-0.0754502	0.881643	-1.79691	3.72e-10	0.221986	0.548822	-1.49947	2.63e-07	Fe_RT_weak
AGAP001222	42	35	17	370	123	157	70	71	58	60	114	59	0.488378	0.324264	-0.46567	0.22464	-0.338496	0.429211	-1.29254	0.000668229	unbiased
AGAP001223	68	35	21	677	373	463	16	22	26	35	59	49	-1.61222	0.000217498	-2.4022	6.17e-12	-1.37743	0.000816991	-2.1674	7.79e-10	Fe_RT_strong
AGAP001224	59	54	31	580	330	442	27	29	52	53	83	71	-1.08416	0.000932085	-1.72221	6.5e-12	-1.17835	7.2e-05	-1.8164	2.44e-12	Fe_RT_weak
AGAP001225	46	63	33	570	234	262	40	78	105	61	140	61	-0.0460077	0.917274	-1.06424	5.98e-05	-0.429692	0.164239	-1.44793	1.36e-07	Fe_RT_weak
AGAP001226	11	12	7	112	53	65	8	13	19	14	23	21	-0.269219	0.669698	-0.987446	0.00458948	-0.772422	0.0771158	-1.49065	0.000135091	unbiased
AGAP001227	36	28	15	378	205	232	26	31	44	137	203	173	-0.313999	0.46784	0.334103	0.209999	-2.58191	7.48e-20	-1.93381	2.77e-11	unbiased
AGAP001228	30	31	16	186	97	146	29	40	40	38	44	59	-0.146548	0.794992	-0.56184	0.107591	-0.645632	0.0938052	-1.06092	0.00288303	unbiased
AGAP001229	129	146	69	1315	789	943	171	188	198	580	804	832	0.0890989	0.8427	0.553585	0.0520976	-2.21673	1.47e-15	-1.75224	4.49e-10	unbiased
AGAP001230	1	0	0	3	0	1	0	0	0	8	4	2	-1.77685	0.463028	2.71671	0.0391801	-4.80374	0.00581181	-0.310179	0.858879	not_expressed
AGAP001231	11	16	15	216	106	132	23	16	24	28	39	40	-0.061527	0.922381	-1.058	0.00176462	-0.972098	0.0142113	-1.96857	1.5e-07	Fe_RT_weak
AGAP001232	59	81	42	236	127	164	60	84	108	91	130	56	-0.194352	0.551237	0.0218723	0.929968	-0.343472	0.181088	-0.127248	0.623623	unbiased
AGAP001233	38	67	29	203	223	197	46	42	65	46	76	73	-0.417804	0.396568	-0.759674	0.038778	-0.572174	0.161902	-0.914044	0.0133586	unbiased
AGAP001234	95	169	96	631	510	594	64	119	200	148	251	137	-0.622449	0.0558353	-0.79602	0.00313748	-0.74352	0.0100441	-0.917092	0.000693456	unbiased
AGAP001235	110	86	82	306	205	239	137	186	184	43	82	44	0.188878	0.538587	-1.22977	1.75e-07	1.40573	5.16e-09	-0.0129215	0.959005	unbiased
AGAP001236	90	127	140	158	5	40	50	69	87	53	73	56	-1.47345	0.0520953	1.05335	0.127026	-0.0741265	0.933998	2.45267	0.000168913	unbiased
AGAP001237	47	45	34	307	153	190	54	88	79	65	111	76	0.135307	0.694788	-0.391378	0.0674002	-0.399261	0.0968817	-0.925946	3.94e-05	unbiased
AGAP001238	19	37	19	0	1	1	46	123	142	91	133	119	1.32838	0.00160091	7.72042	1.7e-20	-0.459318	0.238854	5.93272	2.71e-12	unbiased
AGAP001239	6	9	4	3	4	3	18	23	31	0	4	3	1.25329	0.0499554	0.380088	0.677863	3.08959	1.04e-05	2.21639	0.00126756	Ma_Car_weak
AGAP001240	1421	798	774	6	282	405	210	249	268	3	305	2	-2.36759	0.148508	-0.788949	0.605209	1.30774	0.40274	2.88638	0.0372899	unbiased
AGAP001241	0	0	0	0	1	2	4	7	1	3	9	7	3.75588	0.0428775	3.20679	0.00541084	-0.747448	0.520328	-1.29654	0.474945	not_expressed
AGAP001242	6	19	14	0	2	1	18	40	56	38	76	53	0.816081	0.137655	6.29867	9.63e-16	-0.807664	0.0643727	4.67493	8.92e-09	unbiased
AGAP001243	24	66	48	0	0	3	48	64	79	4	15	4	-0.196241	0.761026	3.40503	8.54e-05	2.88264	4.28e-08	6.48392	6.74e-16	unbiased
AGAP001244	0	0	1	0	0	0	1	0	0	0	0	0	-0.24385	NA	0.199213	NA	1.16692	NA	1.60998	NA	not_expressed
AGAP001245	0	0	0	0	0	0	2	5	2	0	0	0	4.1442	NA	0.446728	0.843326	4.34214	0.0265964	0.64467	0.76922	not_expressed
AGAP001246	0	0	0	0	0	0	1	1	2	0	0	0	2.93676	NA	0.400995	NA	3.12097	NA	0.585203	NA	not_expressed
AGAP001247	0	0	0	0	0	0	0	0	0	0	0	0	NA	NA	NA	NA	NA	NA	NA	NA	not_expressed
AGAP001248	0	0	0	0	0	0	0	0	3	0	0	2	1.48854	NA	1.80723	0.386607	-0.0703945	0.978323	0.248296	0.905827	not_expressed
AGAP001249	0	0	0	0	0	1	1	3	1	0	1	1	2.95525	NA	1.37182	0.462731	1.01105	0.591469	-0.572377	0.785675	not_expressed
AGAP001250	2	2	0	0	0	7	1	1	0	0	1	0	-1.09604	NA	-1.49481	0.431617	0.707634	0.7519	0.308866	0.86697	not_expressed
AGAP001251	1	2	0	4	4	18	33	61	18	32	22	36	4.26872	8.08e-05	2.69661	0.000503232	0.0271047	0.978101	-1.545	0.150207	Ma_Ubi_specific
AGAP001252	6	3	3	0	0	0	4	7	12	1	1	5	0.20291	0.88413	4.08588	0.00655146	1.29885	0.202466	5.18182	0.000370365	not_expressed
AGAP001253	69	89	51	193	108	121	115	180	173	106	200	117	0.500693	0.0209314	0.947569	6.37e-08	-0.0486253	0.830262	0.398251	0.0424511	unbiased
AGAP001255	205	284	224	1392	760	1014	262	428	554	221	367	167	0.09416	0.716275	-1.12973	7.38e-11	0.503359	0.00726778	-0.720526	3.92e-05	Fe_RT_weak
AGAP001256	131	189	108	234	204	363	269	342	351	572	865	418	0.536738	0.142644	2.07882	1.17e-12	-1.11646	0.000242881	0.42562	0.182464	Ma_RT_weak
AGAP001257	3656	3611	2099	591	275	590	4323	5734	6015	531	1162	471	0.13727	0.710989	1.46011	1.6e-08	2.7548	1.05e-27	4.07764	2.49e-59	unbiased
AGAP001258	11	2	2	94	51	39	7	7	4	4	4	8	-0.352106	0.754628	-2.38539	0.000598651	-0.0601468	0.954464	-2.09343	0.00294885	Fe_RT_specific
AGAP001259	7	9	7	58	34	35	13	22	25	20	32	12	0.685884	0.214237	-0.0555473	0.888618	-0.289586	0.51161	-1.03102	0.0168967	unbiased
AGAP001261	35	43	28	726	480	468	6	18	12	33	59	30	-2.21381	8.59e-10	-2.84749	6.19e-34	-1.9418	1.95e-08	-2.57548	6.15e-27	Fe_RT_strong
AGAP001264	188	194	108	1348	645	783	197	275	345	245	350	289	0.070487	0.830103	-0.627502	0.00242511	-0.36895	0.104849	-1.06694	2.7e-07	unbiased
AGAP001265	12	22	13	0	2	2	34	98	79	22	49	20	1.45467	0.00144031	5.06997	3.27e-12	1.005	0.0138023	4.62029	4.68e-10	Ma_Car_specific
AGAP001267	371	447	337	1032	605	649	796	1094	1197	573	916	440	0.747631	3.08e-06	0.694918	2.89e-06	0.491351	0.00135081	0.438637	0.00414616	unbiased
AGAP001268	55	53	23	423	177	201	71	98	103	131	179	157	0.408734	0.301348	0.272881	0.37177	-1.02245	0.000657957	-1.1583	0.00013184	unbiased
AGAP001269	43	52	47	297	155	171	41	84	90	47	123	60	-0.113168	0.771245	-0.513783	0.0353062	-0.284096	0.318921	-0.684711	0.00625278	unbiased
AGAP001270	21	19	8	293	134	152	14	19	30	19	51	32	-0.282547	0.599906	-1.53494	8.85e-07	-0.886006	0.0205545	-2.1384	5.67e-10	Fe_RT_weak
AGAP001271	160	255	145	844	552	639	245	424	506	272	626	263	0.386572	0.0880023	0.0650969	0.760953	-0.157463	0.467371	-0.478939	0.0125669	unbiased
AGAP001272	114	129	78	273	154	210	121	216	236	142	461	110	0.14869	0.748819	0.960003	0.00213931	-0.397075	0.252735	0.414237	0.211839	unbiased
AGAP001273	470	617	350	3243	1877	1933	462	794	862	1654	2705	1860	-0.114345	0.574157	0.79071	2.32e-08	-1.79391	1.3e-36	-0.888859	9.04e-10	unbiased
AGAP001274	5667	5616	4248	7855	4904	6210	2788	3260	5462	2338	4246	3856	-1.12523	1.67e-05	0.113293	0.685745	-0.119396	0.690839	1.11913	3.84e-06	Fe_Car_weak
AGAP001275	3	3	0	3	2	2	15	16	20	38	45	52	2.35631	0.00337557	5.13773	3.58e-15	-1.65715	0.000464631	1.12427	0.216078	Ma_RT_specific
AGAP001276	59	52	31	230	135	156	41	44	58	37	83	63	-0.641882	0.0601775	-0.557958	0.0420652	-0.546612	0.0769721	-0.462687	0.100419	unbiased
AGAP001277	86	85	82	239	138	148	112	163	233	58	79	84	0.284023	0.418418	-0.234698	0.427439	0.907916	0.00118169	0.389195	0.165715	unbiased
AGAP001278	18	48	29	128	73	99	60	84	67	42	80	38	0.51913	0.18216	0.0152805	0.963745	0.244821	0.49109	-0.259029	0.446852	unbiased
AGAP001279	262	308	122	5906	3640	3641	188	470	478	159	420	67	0.0274472	0.966283	-3.51583	1.2e-17	0.694317	0.132298	-2.84896	4.51e-12	Fe_RT_strong
AGAP001280	86	103	71	1135	546	601	164	173	179	69	107	54	0.360537	0.224796	-2.32564	5.76e-24	1.00502	5.02e-05	-1.68116	1.87e-13	Fe_RT_strong
AGAP001281	1263	1327	1008	600	376	557	1280	1782	2078	523	1231	425	-0.165463	0.56314	1.35207	1.92e-10	1.11179	2.09e-07	2.62932	1.35e-36	unbiased
AGAP001283	166	123	109	16	25	35	93	124	126	99	314	99	-0.881216	0.0594999	3.43847	1.51e-16	-0.637383	0.145985	3.6823	8.79e-19	unbiased
AGAP001284	5	4	1	3	1	13	6	12	1	3	30	11	0.339062	0.833856	1.95375	0.0587241	-1.08982	0.333716	0.524861	0.658786	unbiased
AGAP001285	103	113	99	337	206	244	185	243	193	221	294	189	0.330364	0.27817	0.808019	0.000545251	-0.373414	0.145605	0.104241	0.702866	unbiased
AGAP001286	70	83	43	364	203	281	68	82	136	61	119	75	-0.127283	0.704832	-0.788456	0.000267543	-0.0488912	0.871733	-0.710064	0.00140482	unbiased
AGAP001287	303	382	244	1342	704	809	525	945	1132	376	624	270	0.785163	3.51e-05	-0.224523	0.227861	0.816	4.28e-06	-0.193685	0.301262	unbiased
AGAP001290	85	68	36	946	557	735	53	80	82	160	243	168	-0.4757	0.126197	-1.00231	5.89e-06	-1.63009	1.57e-11	-2.1567	3.28e-20	Fe_RT_weak
AGAP001291	2	6	4	0	1	1	8	10	12	0	5	6	0.655968	0.540074	2.91773	0.00895215	1.21417	0.170242	3.47593	0.00150068	not_expressed
AGAP001292	29	35	29	353	251	276	24	41	50	64	107	82	-0.386908	0.280795	-0.854957	0.000106822	-1.3715	1.14e-07	-1.83955	1.11e-13	unbiased
AGAP001293	2	4	3	9	3	6	5	8	10	1036	1424	1276	0.620532	0.456096	8.63526	1.65e-90	-7.56268	3.24e-79	0.452052	0.526579	Ma_RT_specific
AGAP001294	41	43	34	8	3	2	100	162	125	62	88	95	1.04493	0.0065414	5.15371	4.22e-25	0.405769	0.271072	4.51455	6.53e-19	Ma_Ubi_weak
AGAP001296	551	866	577	3292	2436	2630	854	1711	1800	1467	2930	1226	0.428136	0.0742318	0.294714	0.165739	-0.556871	0.00851199	-0.690294	0.000700293	unbiased
AGAP001297	73	84	73	241	145	177	57	69	131	119	175	158	-0.553529	0.0932468	0.671318	0.0113966	-1.0915	7.37e-05	0.133349	0.659654	unbiased
AGAP001298	178	338	205	1489	1081	1146	256	419	501	172	342	171	0.0281618	0.926897	-1.54442	2.56e-15	0.578826	0.00620712	-0.993755	4.02e-07	Fe_RT_weak
AGAP001299	108	166	128	183	102	115	141	172	250	185	213	150	-0.196434	0.535761	1.45316	4.71e-10	-0.218954	0.414879	1.43063	1.33e-09	unbiased
AGAP001300	66	62	53	250	99	158	62	74	88	104	125	134	-0.36326	0.358336	0.581804	0.0507618	-0.9581	0.00183431	-0.0130359	0.969275	unbiased
AGAP001301	1	2	3	0	4	2	6	3	7	70	99	79	0.697881	0.501688	6.11958	4.85e-20	-4.13009	1.68e-14	1.29161	0.159265	Ma_RT_specific
AGAP001302	128	171	112	721	500	529	101	152	188	156	231	195	-0.577012	0.0128749	-0.621248	0.00123976	-0.655962	0.00160736	-0.700199	0.000329156	unbiased
AGAP001303	54	97	31	38	21	68	86	98	80	74	106	60	-0.0115668	0.985951	1.82273	4.4e-05	-0.0199582	0.972459	1.81434	5.19e-05	unbiased
AGAP001304	27	16	10	7	5	6	46	60	92	40	54	43	1.20064	0.00498191	3.83579	1.99e-16	0.269373	0.509302	2.90452	4.28e-09	Ma_Ubi_weak
AGAP001306	88	88	53	471	254	300	88	111	112	86	146	100	-0.207072	0.467103	-0.656381	0.000855317	-0.290237	0.208783	-0.739546	0.000266816	unbiased
AGAP001307	77	109	76	221	111	164	140	179	170	197	277	220	0.255694	0.387633	1.48045	3.77e-12	-0.722155	0.00123328	0.502604	0.0314971	Ma_RT_weak
AGAP001308	83	108	73	62	21	51	131	170	169	82	217	84	0.185517	0.621858	2.40358	3.14e-17	0.186457	0.556789	2.40452	7.11e-17	unbiased
AGAP001309	2	2	1	1	2	0	19	16	24	29	54	39	2.81394	0.000469736	5.95241	1.25e-13	-1.22951	0.00495747	1.90897	0.0651079	Ma_RT_specific
AGAP001310	45	53	27	238	139	153	53	62	61	40	63	45	-0.141889	0.708002	-0.873803	0.000295145	0.0545105	0.873444	-0.677403	0.00646123	unbiased
AGAP001311	87	81	70	143	86	111	57	54	53	59	64	78	-1.16048	0.00228566	0.270071	0.465208	-0.525479	0.168409	0.905072	0.00738187	Fe_Car_weak
AGAP001312	1995	2030	1589	1517	772	1097	2906	4032	3193	762	1441	675	0.207194	0.435673	0.694464	0.000744787	1.67739	6.5e-17	2.16466	9.94e-28	unbiased
AGAP001313	356	461	354	893	350	497	368	556	655	310	902	228	-0.258985	0.510229	0.59376	0.0510904	0.0484873	0.903105	0.901233	0.00232438	unbiased
AGAP001314	49	47	20	168	67	105	64	78	66	57	74	72	0.233137	0.6372	0.303855	0.407986	-0.186581	0.652716	-0.115863	0.768745	unbiased
AGAP001315	441	706	374	1612	1018	1155	698	1304	1374	562	1638	300	0.474399	0.285743	0.178267	0.657412	0.357078	0.375324	0.0609459	0.876747	unbiased
AGAP001316	19	30	17	9	1	4	19	40	35	6	31	5	-0.160342	0.834033	2.36259	0.000196074	1.07209	0.0558973	3.59502	2.67e-09	unbiased
AGAP001318	83	161	99	132	93	137	81	115	191	113	188	117	-0.515713	0.104881	1.12646	2.12e-05	-0.355942	0.228345	1.28623	1.22e-06	unbiased
AGAP001319	174	219	172	233	147	161	290	408	397	130	308	79	0.288599	0.418496	0.772143	0.00639541	0.988399	0.000465476	1.47194	7.52e-08	unbiased
AGAP001320	230	292	187	1485	868	1005	224	350	484	266	352	182	-0.117193	0.656773	-1.10458	1.02e-09	0.154452	0.480016	-0.832937	5.07e-06	Fe_RT_weak
AGAP001321	116	116	88	296	183	272	137	148	186	94	174	155	-0.0976949	0.806051	0.134251	0.647029	-0.0564404	0.870802	0.175505	0.542394	unbiased
AGAP001322	53	87	58	249	182	187	140	172	151	121	216	141	0.595742	0.0381437	0.553799	0.0201604	-0.215928	0.426788	-0.257871	0.325429	unbiased
AGAP001323	827	833	600	21	9	19	5915	6210	4039	372	429	448	2.24325	3.48e-09	5.63387	4.08e-43	3.47316	4.3e-22	6.86378	9.24e-64	Ma_Car_weak
AGAP001324	56	99	52	449	333	358	52	84	126	110	208	165	-0.343446	0.326423	-0.303124	0.254422	-1.13664	2.1e-05	-1.09632	2.46e-05	unbiased
AGAP001325	1172	1467	947	1243	798	890	2384	3507	4007	444	946	507	0.793828	3.22e-13	0.2826	0.013598	2.199	2.42e-96	1.68777	2.15e-57	unbiased
AGAP001326	11	9	3	110	50	71	8	13	14	24	33	47	-0.0616409	0.941475	-0.0914485	0.847794	-1.84092	0.00014611	-1.87073	0.000153109	unbiased
AGAP001328	84	128	100	497	279	281	145	265	296	120	227	68	0.468924	0.154768	-0.446809	0.110757	0.590577	0.0400235	-0.325156	0.254068	unbiased
AGAP001329	0	0	1	0	0	0	2	1	3	1	1	0	1.61962	NA	2.65065	0.160491	1.26699	0.470397	2.29802	0.238448	not_expressed
AGAP001330	233	278	200	689	397	517	178	369	456	251	453	229	-0.225235	0.327609	0.147731	0.44371	-0.130146	0.536393	0.242819	0.193822	unbiased
AGAP001331	0	0	0	0	0	0	0	0	0	1	0	0	-0.205389	NA	1.69478	NA	-1.48611	NA	0.414059	NA	not_expressed
AGAP001332	0	0	0	0	0	0	1	0	2	7	9	5	2.26118	0.309832	5.97728	0.000189819	-2.9152	0.0179642	0.800894	0.713281	not_expressed
AGAP001333	65	43	3	1554	781	856	19	37	77	94	115	100	-0.430062	0.624103	-2.27129	0.000208668	-1.53821	0.0196103	-3.37945	3.59e-08	Fe_RT_weak
AGAP001334	53	86	35	289	151	200	66	73	77	42	70	53	-0.296635	0.396568	-0.975756	0.000155278	0.195037	0.540965	-0.484083	0.0666847	unbiased
AGAP001335	249	338	175	2084	1050	1243	311	420	504	1511	1943	1880	0.0498994	0.890737	1.32468	9.48e-10	-2.37899	7.11e-28	-1.1042	7.36e-07	Ma_RT_weak
AGAP001336	167	277	135	2443	1674	1695	486	648	574	222	292	103	0.950948	0.00420842	-2.30202	2.39e-15	1.29851	1.8e-05	-1.95446	2.03e-11	Fe_RT_strong
AGAP001337	10	10	16	17	24	11	31	57	77	131	203	183	1.41767	0.00589546	4.1867	1.29e-23	-1.926	1.51e-06	0.843027	0.0947218	Ma_RT_specific
AGAP001338	49	70	30	207	139	186	58	82	106	91	127	102	0.0660867	0.875716	0.229048	0.370894	-0.629768	0.0154573	-0.466807	0.0741387	unbiased
AGAP001339	20	34	25	207	117	143	29	85	77	107	165	120	0.555111	0.134442	0.720763	0.00530226	-1.30404	1.6e-06	-1.13839	0.000114899	unbiased
AGAP001340	21	42	23	107	46	69	30	38	62	17	41	22	-0.0756757	0.883241	-0.518169	0.116715	0.499944	0.163847	0.0574509	0.86805	unbiased
AGAP001341	324	444	281	3024	2156	2469	415	588	511	359	550	316	-0.108087	0.67824	-1.71225	1.58e-22	0.117915	0.589111	-1.48625	3.65e-17	Fe_RT_weak
AGAP001342	8	13	4	55	36	55	10	10	10	32	33	51	-0.339321	0.672062	0.69324	0.136167	-2.19855	1.6e-05	-1.16599	0.0264611	unbiased
AGAP001343	131	187	164	5	1	9	172	285	348	69	165	60	0.024254	0.953851	5.06317	1.66e-29	1.28503	5.86e-06	6.32395	3.54e-46	unbiased
AGAP001344	6	14	12	0	0	0	18	57	54	15	25	21	1.265	0.0255015	6.72742	5.43e-08	0.78447	0.118732	6.2469	5.41e-07	unbiased
AGAP001345	0	1	0	0	0	0	0	0	1	0	0	0	-0.316397	NA	0.240013	NA	0.951358	NA	1.50777	NA	not_expressed
AGAP001346	57	26	30	11	9	42	36	30	22	20	36	18	-0.93692	0.233771	1.07629	0.114503	0.170322	0.838286	2.18353	0.000683702	unbiased
AGAP001347	44	65	36	188	120	152	54	74	80	56	69	66	-0.131487	0.735133	-0.282129	0.288285	-0.126546	0.690839	-0.277188	0.305992	unbiased
AGAP001348	3	3	0	0	1	0	0	1	0	12	19	20	-2.64325	0.0930586	5.87103	7.4e-07	-5.30656	2.31e-05	3.20771	0.0146759	unbiased
AGAP001349	59	52	47	260	115	169	55	94	155	69	120	66	0.205326	0.577815	-0.122415	0.675237	0.00687689	0.983512	-0.320864	0.251339	unbiased
AGAP001350	19	33	20	32	19	20	42	67	61	19	69	22	0.579491	0.18265	1.47374	6.54e-05	0.518629	0.170434	1.41288	0.000206937	unbiased
AGAP001351	26	42	20	49	24	32	40	61	74	42	79	22	0.327521	0.449617	1.34597	3.97e-05	0.125728	0.74936	1.14418	0.00083514	unbiased
AGAP001352	92	65	92	0	20	99	193	198	251	2	3	1	0.629181	0.635494	-3.13688	0.0035825	5.99617	1.57e-08	2.23011	0.0224737	unbiased
AGAP001353	0	0	0	0	0	0	0	0	0	13	30	23	-0.358298	0.906265	7.85716	7.93e-07	-7.42982	9.67e-06	0.785632	0.720475	Ma_RT_specific
AGAP001354	0	3	1	0	0	0	1	1	13	1	0	1	1.04422	0.586567	2.58377	0.159138	2.0581	0.203355	3.59765	0.0397393	not_expressed
AGAP001355	3	7	3	0	0	0	4	11	37	0	0	0	1.19896	0.293795	0.606967	0.778817	5.98147	0.000181206	5.38949	0.000405428	unbiased
AGAP001356	158	504	266	27	7	32	430	938	900	87	155	34	0.60947	0.319477	2.90248	1.59e-08	2.8275	6.79e-09	5.12051	1.43e-24	unbiased
AGAP001357	59	57	61	346	228	282	62	108	104	75	110	103	-0.0772985	0.856922	-0.593082	0.0227306	-0.330375	0.267189	-0.846158	0.00135361	unbiased
AGAP001358	34	52	45	154	80	83	41	137	153	59	182	68	0.562445	0.225843	0.830896	0.0258121	-0.0933158	0.843632	0.175135	0.679757	unbiased
AGAP001360	10	11	0	405	218	253	0	0	0	27	39	25	-4.92519	0.000324528	-2.28518	6e-13	-6.60129	1.02e-07	-3.96127	5.42e-21	Fe_RT_weak
AGAP001361	44	60	29	343	198	242	51	87	74	99	122	79	0.0195593	0.960384	-0.40429	0.0787744	-0.731746	0.00310155	-1.1556	1.42e-06	unbiased
AGAP001362	107	130	62	1068	656	737	107	135	182	92	191	81	-0.150148	0.599298	-1.8498	2.16e-22	0.0509031	0.850311	-1.64875	1.39e-17	Fe_RT_weak
AGAP001363	85	107	37	460	289	310	98	151	177	98	183	133	0.248852	0.467106	-0.402469	0.113781	-0.185541	0.528391	-0.836861	0.000933979	unbiased
AGAP001364	43	44	30	116	63	73	42	47	71	82	108	66	-0.221488	0.540517	0.99657	2.66e-05	-0.901884	0.000409158	0.316174	0.246921	unbiased
AGAP001365	336	388	278	435	258	310	207	297	367	48	70	26	-0.884263	5.49e-08	-1.86007	1.06e-22	2.3878	3.46e-36	1.412	6.8e-21	unbiased
AGAP001366	345	437	421	17	10	44	571	842	1007	167	253	127	0.293466	0.567786	3.79619	1.99e-20	1.91354	7.33e-07	5.41626	6.24e-41	unbiased
AGAP001367	71	138	70	144	43	67	179	346	395	110	217	76	1.03616	0.0026273	1.62515	2.69e-07	0.998121	0.00169516	1.58712	6.4e-07	Ma_Car_weak
AGAP001368	372	408	259	3428	2316	2552	500	761	878	221	471	215	0.36469	0.0345765	-2.30119	1.2e-57	1.0607	1.69e-12	-1.60518	3.59e-29	Fe_RT_strong
AGAP001369	234	342	287	78	41	85	599	1070	1251	385	759	192	1.03083	0.00591825	3.53781	2.39e-25	0.967414	0.00541831	3.4744	2.31e-24	Ma_Car_weak
AGAP001370	22	35	18	323	186	215	27	61	77	36	106	36	0.431755	0.303399	-1.14984	5.95e-05	-0.277272	0.432617	-1.85887	1.86e-09	Fe_RT_weak
AGAP001371	11	11	11	85	56	70	7	13	15	13	35	40	-0.612428	0.34874	-0.297129	0.509877	-1.56309	0.00123614	-1.24779	0.0065929	unbiased
AGAP001372	155	164	162	813	466	577	284	452	508	597	879	610	0.660911	0.000724928	1.14385	2.91e-12	-0.989454	4.22e-09	-0.506515	0.00453726	Ma_RT_weak
AGAP001373	107	146	85	867	406	505	132	195	230	120	197	116	0.0516553	0.848504	-1.05782	2.52e-11	0.149539	0.446779	-0.959936	3.75e-09	Fe_RT_weak
AGAP001374	757	643	424	1	1	1	0	1	1	1	6	1	-10.0685	8.35e-29	2.05812	0.0332686	-1.81939	0.103848	10.3072	2.46e-40	Fe_Car_specific
AGAP001375	25	26	29	17	11	17	17	28	44	21	38	25	-0.570912	0.191067	1.8185	2.41e-06	-0.153933	0.728837	2.23548	5.12e-09	unbiased
AGAP001376	115	181	147	1	0	24	157	362	303	72	218	90	0.169046	0.889142	4.46005	1.82e-08	0.931624	0.27618	5.22263	3.17e-11	unbiased
AGAP001377	781	1175	673	1266	513	749	606	972	1259	211	423	164	-0.569827	0.0134789	-0.71601	0.00067764	1.64122	2e-15	1.49504	8.01e-14	unbiased
AGAP001379	4	5	1	98	41	49	1	6	2	56	66	43	-0.78324	0.412476	0.834661	0.0256815	-4.34531	8.36e-14	-2.72741	1.56e-06	unbiased
AGAP001380	356	299	190	1660	893	1083	102	96	165	140	268	208	-1.87087	1.88e-11	-1.57808	1.09e-09	-0.970306	0.000546571	-0.67752	0.0100639	Fe_RT_weak
AGAP001381	341	430	272	440	178	315	475	798	853	521	1105	333	0.346943	0.279613	1.96516	5.27e-15	-0.021593	0.95056	1.59662	3.16e-10	unbiased
AGAP001382	134	135	111	4	7	4	211	243	249	27	43	34	0.238833	0.483534	3.64814	1.08e-15	2.55939	1.08e-19	5.9687	3.64e-43	unbiased
AGAP001384	73	156	98	224	150	164	253	607	528	97	273	43	1.37437	0.00296515	0.388166	0.394324	1.64229	0.000114225	0.656084	0.133465	Ma_Car_weak
AGAP001386	213	254	164	1808	1145	1299	282	432	614	195	454	158	0.374454	0.139137	-1.52957	3.85e-14	0.553991	0.011559	-1.35003	3.4e-11	Fe_RT_weak
AGAP001387	450	431	159	7167	3670	4050	370	534	564	571	975	823	-0.128636	0.778087	-1.63388	4.93e-08	-0.919976	0.00370361	-2.42522	4.29e-16	Fe_RT_weak
AGAP001388	0	0	0	0	0	0	1	0	1	157	221	217	1.40054	0.530583	10.5921	1.28e-14	-8.24548	2.18e-17	0.946025	0.646171	Ma_RT_specific
AGAP001389	0	0	0	0	0	0	0	1	0	6	21	17	1.01172	0.70272	7.05816	8.46e-06	-5.24784	0.000182065	0.798598	0.714367	unbiased
AGAP001390	23	13	14	11	9	14	48	82	99	76	89	28	1.45257	0.00376806	3.36685	4.84e-13	0.0135897	0.979953	1.92787	0.000131805	Ma_Ubi_weak
AGAP001391	72	60	26	803	405	442	47	78	88	73	121	55	-0.237685	0.552742	-1.76348	3.76e-11	-0.426579	0.179096	-1.95237	1.17e-12	Fe_RT_weak
AGAP001392	52	70	56	52	46	50	106	103	116	325	482	417	0.233957	0.56374	3.97978	6.33e-44	-2.10938	3.32e-14	1.63644	1.23e-07	Ma_RT_strong
AGAP001393	15	22	11	174	102	104	17	15	16	26	52	25	-0.631831	0.172179	-0.950193	0.000869929	-1.25073	0.000453768	-1.56909	9.7e-07	unbiased
AGAP001394	95	185	133	491	260	348	310	590	588	127	285	124	1.1522	2.38e-06	-0.127548	0.622749	1.29061	1.61e-08	0.0108575	0.966772	Ma_Car_weak
AGAP001395	5	2	2	1	1	6	5	1	5	6	11	9	-0.321941	0.819168	2.46318	0.00616445	-1.34364	0.153602	1.44148	0.148139	unbiased
AGAP001396	79	77	64	278	112	166	68	100	100	70	91	80	-0.392714	0.219112	-0.169177	0.539804	-0.0923496	0.777468	0.131187	0.640578	unbiased
AGAP001397	11	12	6	50	22	38	15	22	22	9	9	9	0.359829	0.551576	-1.015	0.0220682	0.879694	0.070509	-0.495132	0.273569	unbiased
AGAP001398	2	8	5	18	12	24	17	13	11	31	47	69	0.84539	0.316249	2.40839	1.3e-05	-2.01607	0.00050097	-0.453068	0.530596	Ma_RT_strong
AGAP001399	231	263	203	906	613	681	209	360	487	342	563	188	-0.121818	0.742764	-0.120764	0.671401	-0.254192	0.376659	-0.253138	0.344135	unbiased
AGAP001400	48	38	32	257	157	175	43	48	59	45	68	55	-0.323148	0.36774	-0.837461	0.000727953	-0.379993	0.200898	-0.894306	0.000513738	unbiased
AGAP001401	77	84	44	656	368	359	72	98	94	52	95	53	-0.278788	0.358016	-1.83346	3.07e-17	0.218581	0.424458	-1.33609	7.48e-10	Fe_RT_weak
AGAP001402	116	101	63	951	576	607	90	109	146	89	162	78	-0.365915	0.17458	-1.76656	1.82e-18	-0.114577	0.667607	-1.51522	1.14e-13	Fe_RT_weak
AGAP001403	63	39	32	183	91	93	201	251	275	31	46	32	1.76573	5.29e-09	-0.753343	0.0151559	2.52251	8.73e-18	0.00343414	0.992435	Ma_Car_weak
AGAP001404	47	44	11	815	527	543	43	58	56	32	55	42	0.00562336	0.991504	-2.89485	6.53e-19	0.077073	0.869061	-2.8234	2.23e-17	Fe_RT_strong
AGAP001405	24	30	19	181	82	126	29	41	66	33	64	55	0.203344	0.654638	-0.364542	0.220882	-0.406491	0.222064	-0.974377	0.00158086	unbiased
AGAP001406	38	48	22	200	117	135	15	16	20	92	116	113	-1.70857	6.56e-06	0.515007	0.068113	-2.89077	2.12e-18	-0.667191	0.0275844	unbiased
AGAP001407	237	287	188	1392	834	975	191	254	401	407	589	428	-0.441259	0.033118	-0.191155	0.294011	-1.00993	9e-09	-0.759825	1.11e-05	unbiased
AGAP001408	3269	3623	2592	5847	3615	4717	1678	2043	2692	1401	2412	2190	-1.23024	2.53e-08	-0.260015	0.248998	-0.146288	0.559498	0.823936	8.86e-05	Fe_Car_weak
AGAP001409	106	95	101	15	19	8	55	77	126	1	1	1	-0.960888	0.021079	-2.55937	0.00212655	5.80015	2.62e-13	4.20167	8.35e-25	unbiased
AGAP001410	20	31	22	5	5	9	50	124	129	19	56	9	1.31453	0.0100534	2.84788	1.85e-07	1.70257	0.000243723	3.23593	2.62e-09	Ma_Car_weak
AGAP001411	255	545	396	390	230	336	393	528	562	408	652	440	-0.34475	0.268987	1.60131	7.83e-11	-0.224816	0.433373	1.72125	2.64e-12	unbiased
AGAP001412	11	16	6	3	3	4	13	20	29	22	106	22	0.239123	0.776005	4.49629	2.31e-12	-1.30504	0.0172013	2.95213	1.57e-05	Ma_RT_specific
AGAP001413	21	22	16	4	0	1	36	49	65	27	36	25	0.662652	0.0986334	4.89025	1.13e-13	0.533752	0.125594	4.76135	9.13e-13	unbiased
AGAP001414	67	83	65	420	222	303	71	85	116	118	187	134	-0.337175	0.18586	-0.131988	0.505087	-0.911577	4.12e-06	-0.706389	0.000259837	unbiased
AGAP001415	25	46	27	0	2	1	79	230	231	17	25	3	1.71833	0.00105369	4.3105	2.88e-07	3.31599	5.32e-11	5.90816	4.41e-13	Ma_Car_weak
AGAP001416	0	0	0	0	0	0	0	0	0	684	894	966	-0.442563	0.881349	12.6649	2.54e-20	-12.1556	3.01e-17	0.951908	0.642688	Ma_RT_specific
AGAP001417	392	439	268	312	164	274	776	932	797	106	162	80	0.576926	0.0378551	-0.160884	0.571813	2.68864	4.67e-28	1.95083	4.75e-16	unbiased
AGAP001418	156	179	136	1345	763	819	273	397	388	215	437	210	0.49908	0.00612514	-0.837707	2.37e-08	0.131121	0.470738	-1.20567	7.61e-15	unbiased
AGAP001419	79	242	142	43	31	65	148	386	350	2202	3233	2618	0.233833	0.67795	6.73182	1.33e-65	-3.45427	2.8e-19	3.04372	5.58e-14	Ma_RT_strong
AGAP001420	2192	2192	1590	742	368	587	13737	16918	17487	1093	2128	998	2.35933	1.03e-39	2.23451	3.35e-35	3.36591	6.74e-82	3.24109	2.03e-73	Ma_Car_strong
AGAP001421	77	105	68	1562	828	832	74	107	158	216	346	233	-0.248986	0.366642	-1.03215	1.03e-08	-1.46919	8.17e-14	-2.25235	2.42e-31	Fe_RT_weak
AGAP001422	22	26	10	362	195	246	6	12	5	14	24	25	-1.93888	0.000101864	-2.66696	3.41e-15	-1.64801	0.00046538	-2.37609	5.12e-12	Fe_RT_strong
AGAP001423	175	839	309	1510	1046	1313	23	39	76	106	243	209	-3.85982	2.58e-15	-1.83069	8.39e-05	-2.26889	3.35e-06	-0.239766	0.644779	Fe_Ubi_weak
AGAP001424	468	1492	625	4314	2515	2764	392	1108	895	523	1079	311	-0.762658	0.0996302	-1.44237	0.000221487	0.148673	0.76241	-0.531044	0.194269	unbiased
AGAP001425	0	0	1	15	10	20	3	1	5	87	113	139	1.78911	0.218522	3.87296	2.02e-15	-5.41566	2.97e-17	-3.33181	0.00291017	Ma_RT_specific
AGAP001426	70	91	59	93	62	67	93	109	163	68	71	86	0.0605047	0.896404	1.03577	0.000592962	0.399678	0.220128	1.37494	4.08e-06	unbiased
AGAP001427	136	277	175	1302	690	741	395	1059	1009	172	555	87	1.33328	0.00519047	-0.948267	0.0305509	1.49433	0.000661563	-0.787217	0.0738103	Ma_Car_weak
AGAP001428	28	35	14	153	71	83	32	49	43	31	57	40	0.0430033	0.929334	-0.278594	0.35488	-0.246479	0.476387	-0.568076	0.0645879	unbiased
AGAP001429	7	12	14	6	5	3	23	45	54	66	79	101	1.1374	0.0399436	5.05695	3.24e-21	-1.33502	0.00195044	2.58453	1.26e-05	Ma_RT_specific
AGAP001430	41	46	36	343	192	218	40	110	101	41	94	19	0.296632	0.545241	-1.41952	5.41e-05	0.542541	0.172594	-1.17361	0.000972442	Fe_RT_weak
AGAP001432	14	16	8	298	172	194	8	25	20	52	81	81	-0.208542	0.732809	-0.630824	0.0400407	-2.27419	1.93e-10	-2.69647	1.1e-13	unbiased
AGAP001433	4	2	2	5	3	3	3	2	0	7	15	11	-1.20824	0.309787	2.45257	0.000847484	-2.73473	0.00162955	0.926078	0.301029	not_expressed
AGAP001434	11	25	37	1	0	2	63	195	184	16	41	5	1.74941	0.011599	4.67884	2.3e-07	2.63488	3.21e-05	5.56431	4.54e-10	Ma_Car_weak
AGAP001435	101	161	151	178	82	143	243	412	456	36	107	24	0.706146	0.0695737	-0.420092	0.263943	2.60818	2.6e-14	1.48195	9.63e-06	unbiased
AGAP001438	337	412	341	918	533	602	395	590	648	276	572	276	-0.10424	0.590694	0.0486423	0.767768	0.363383	0.0152846	0.516265	0.000246911	unbiased
AGAP001439	7	11	7	16	7	3	7	10	17	6	11	4	-0.242078	0.777031	0.644401	0.325237	0.479156	0.487852	1.36564	0.0234729	unbiased
AGAP001440	348	396	242	2244	1172	1315	323	417	529	602	897	628	-0.298275	0.119285	-0.158504	0.33282	-0.975102	3.69e-10	-0.835332	5.52e-08	unbiased
AGAP001441	43	38	25	206	88	101	46	51	92	103	165	121	0.146155	0.743933	0.988639	0.000223614	-1.27796	6.07e-06	-0.435478	0.157427	unbiased
AGAP001442	31	45	31	92	72	89	23	24	23	24	37	46	-1.23284	0.00485662	-0.268473	0.501433	-0.834566	0.0461613	0.129802	0.751397	unbiased
AGAP001443	5	1	3	1	0	0	2	6	3	4	5	6	-0.412035	0.762116	4.1191	0.000919001	-0.691331	0.500517	3.8398	0.00249016	not_expressed
AGAP001444	40	72	45	106	43	56	31	100	97	18	54	16	-0.185102	0.731887	-0.311054	0.467979	1.18001	0.0035011	1.05406	0.00506229	unbiased
AGAP001445	0	0	0	2	2	1	1	1	0	5	7	3	1.60381	0.486167	2.35844	0.0285631	-2.83065	0.0279751	-2.07603	0.237862	not_expressed
AGAP001446	316	438	304	1404	894	1040	570	1015	999	392	1001	298	0.600875	0.0283839	-0.147709	0.577555	0.492919	0.0528201	-0.255665	0.313165	unbiased
AGAP001447	141	249	120	442	193	268	124	182	223	134	193	107	-0.596464	0.0149069	-0.064575	0.795605	0.0604991	0.830262	0.592388	0.00558914	unbiased
AGAP001448	5	8	4	0	0	0	13	21	24	2	2	3	1.10111	0.117754	3.97068	0.00546399	2.75479	0.000153949	5.62436	3.43e-05	unbiased
AGAP001449	8	2	2	3	1	1	4	10	12	61	96	81	0.3858	0.664516	6.34465	1.29e-19	-3.43447	9.59e-13	2.52438	0.00216766	Ma_RT_specific
AGAP001450	42	59	28	262	129	152	57	85	110	56	80	51	0.295471	0.341324	-0.553253	0.0137633	0.197505	0.461242	-0.65122	0.00540256	unbiased
AGAP001451	104	152	98	585	338	369	167	343	363	165	377	117	0.599348	0.0393295	-0.0993472	0.724068	0.244619	0.386693	-0.454077	0.0785039	unbiased
AGAP001452	150	171	88	1776	989	1120	205	264	256	253	494	254	0.194582	0.441669	-1.02145	4.34e-09	-0.620908	0.00102278	-1.83694	2.61e-24	Fe_RT_weak
AGAP001453	19	18	5	438	231	214	6	4	6	89	146	117	-1.97078	0.000474009	-0.32327	0.326834	-4.60187	1.76e-23	-2.95436	8.86e-16	unbiased
AGAP001454	38	23	16	116	62	69	25	36	55	19	40	25	-0.109762	0.838659	-0.60042	0.0833991	0.245522	0.550908	-0.245135	0.504673	unbiased
AGAP001455	175	241	172	1325	807	892	247	366	475	517	898	585	0.199318	0.276959	0.354485	0.00770186	-1.1053	1.86e-16	-0.95013	6.68e-12	unbiased
AGAP001458	6	8	4	169	103	110	9	2	4	8	13	13	-0.837488	0.278968	-2.49351	1.12e-08	-1.31328	0.0296726	-2.9693	1.71e-09	Fe_RT_strong
AGAP001459	3959	4477	3246	5418	3695	5287	1951	1928	3052	1431	2435	2274	-1.40768	2.53e-07	-0.262823	0.34853	-0.0615044	0.857548	1.08335	2.62e-05	Fe_Car_weak
AGAP001460	152	351	200	1141	726	788	182	304	390	180	351	201	-0.359512	0.220027	-0.932211	6.38e-05	0.0376101	0.906695	-0.535088	0.0243742	unbiased
AGAP001461	52	55	33	210	87	127	54	68	97	45	68	67	-0.0271721	0.951374	-0.204713	0.501021	0.0262346	0.946888	-0.151306	0.632742	unbiased
AGAP001462	30	36	26	325	149	191	45	57	67	55	79	38	0.207662	0.573799	-0.971776	2.31e-05	-0.223629	0.441633	-1.40307	1.91e-08	unbiased
AGAP001463	35	32	15	238	115	110	28	25	33	113	139	153	-0.549496	0.274888	0.866137	0.0134579	-2.46747	2.6e-11	-1.05183	0.00531486	unbiased
AGAP001464	359	470	429	490	300	391	231	418	581	285	616	166	-0.77488	0.0225951	0.697027	0.0228119	0.0397855	0.921518	1.51169	2.8e-07	unbiased
AGAP001466	23	19	19	94	83	91	18	28	32	8	24	22	-0.342731	0.522528	-1.39901	0.000247648	0.309168	0.518696	-0.747114	0.0508876	unbiased
AGAP001467	139	235	112	1837	1154	1342	127	275	387	121	301	104	-0.00674069	0.987207	-2.17621	1.36e-15	0.391738	0.211269	-1.77773	7.66e-11	Fe_RT_weak
AGAP001468	255	357	320	29	29	56	348	480	419	118	176	83	-0.24178	0.594851	2.57744	5.14e-13	1.5447	6.76e-06	4.36393	3.92e-36	unbiased
AGAP001469	83	143	97	832	485	541	210	289	342	139	249	140	0.71157	0.000108763	-0.871632	2.27e-08	0.47322	0.00517527	-1.10998	9.32e-12	unbiased
AGAP001470	104	111	64	7	8	13	144	199	279	158	219	171	0.476865	0.109517	5.1966	1.18e-49	-0.0792721	0.796566	4.64046	1.43e-38	unbiased
AGAP001471	52	74	35	779	407	555	106	136	130	253	376	279	0.575891	0.0321276	0.0508129	0.822879	-1.49704	2.92e-13	-2.02211	1.83e-20	unbiased
AGAP001472	63	98	57	413	226	240	94	157	172	90	173	99	0.281953	0.242514	-0.330387	0.0697731	0.0184021	0.941459	-0.593938	0.00151785	unbiased
AGAP001473	171	180	108	100	54	75	255	399	542	99	133	47	0.685947	0.0212373	1.22093	1.47e-05	1.86674	2.12e-12	2.40172	5.91e-19	unbiased
AGAP001474	74	89	74	0	0	1	132	143	215	27	36	41	0.368623	0.343269	6.52439	5.14e-12	1.97148	9.35e-10	8.12725	3.22e-18	unbiased
AGAP001475	167	206	181	405	220	236	156	241	248	181	333	211	-0.468957	0.0207409	0.711132	3.82e-05	-0.373641	0.0462356	0.806448	3.51e-06	unbiased
AGAP001476	649	515	361	517	266	317	729	998	1215	413	678	405	0.268144	0.27854	1.41119	8.01e-13	0.762239	0.000156241	1.90529	1.82e-22	unbiased
AGAP001477	244	173	230	13	65	48	80	102	133	9	104	10	-1.70661	0.0446769	0.360024	0.674649	1.41384	0.078433	3.48048	1.95e-06	Fe_Car_weak
AGAP001478	25	27	22	48	22	15	94	137	132	66	114	81	1.61792	5.28e-07	2.59784	3.49e-18	0.267918	0.38355	1.24784	0.000224607	Ma_Ubi_weak
AGAP001480	348	371	274	523	406	517	620	1098	959	343	572	174	0.745643	0.0205517	0.445009	0.135287	1.13216	8.55e-05	0.831523	0.00358776	unbiased
AGAP001481	75	108	74	304	183	180	57	124	146	313	555	432	-0.362809	0.236398	1.93008	1.16e-18	-2.25464	3.88e-23	0.0382418	0.886169	Ma_RT_weak
AGAP001482	196	230	161	901	577	668	273	388	491	197	356	174	0.290412	0.0795659	-0.642818	1.61e-06	0.46698	0.00107491	-0.46625	0.000687146	unbiased
AGAP001483	0	0	0	1	0	2	6	3	3	5	18	7	3.78215	0.0357525	3.8993	0.000185289	-1.30137	0.162127	-1.18422	0.510787	unbiased
AGAP001484	64	63	61	314	186	211	102	118	109	106	170	124	0.152412	0.667719	0.138465	0.594361	-0.468347	0.0685347	-0.482294	0.0545996	unbiased
AGAP001485	19	46	28	14	2	12	71	78	79	165	221	161	0.673222	0.117542	5.24303	2.07e-37	-1.45835	1.37e-05	3.11146	1.14e-12	Ma_RT_specific
AGAP001486	226	387	301	34	15	64	724	1106	947	358	669	186	0.931364	0.0650877	4.217	1.18e-21	1.06713	0.0189576	4.35276	5.8e-23	unbiased
AGAP001487	16	22	12	10	6	8	64	89	74	63	112	57	1.53593	1.08e-05	4.15729	9.63e-28	-0.197112	0.533121	2.42425	1.38e-08	Ma_Ubi_weak
AGAP001488	336	439	222	1600	707	777	635	1362	1200	387	864	182	1.0006	0.0112585	-0.220693	0.571081	1.02958	0.00461107	-0.191718	0.624967	Ma_Car_weak
AGAP001490	61	98	83	521	219	254	81	110	136	231	334	298	-0.251793	0.50119	0.843351	0.00128966	-1.65237	7.29e-10	-0.557229	0.0459884	unbiased
AGAP001491	49	71	46	260	124	151	99	100	97	114	116	111	0.223692	0.604366	0.404692	0.200163	-0.431002	0.199034	-0.250002	0.457597	unbiased
AGAP001492	59	55	40	406	167	191	41	88	74	79	102	83	-0.293943	0.456771	-0.483714	0.0901154	-0.643161	0.0363642	-0.832931	0.00365145	unbiased
AGAP001493	2	5	0	2	2	0	4	22	21	7	26	2	1.94845	0.0904604	3.52483	0.000675393	0.306894	0.780043	1.88328	0.10424	not_expressed
AGAP001495	3	8	7	3	1	3	8	8	20	11	18	15	0.291178	0.742474	3.48468	8.55e-07	-0.538627	0.389663	2.65488	0.000465625	unbiased
AGAP001496	524	448	326	347	59	142	953	1481	1491	317	755	324	0.909542	0.0319695	2.35413	1.81e-10	1.33921	0.000413177	2.7838	3.35e-14	unbiased
AGAP001497	2713	3688	2624	1239	661	809	4066	6297	6105	2724	4088	1611	0.199118	0.468062	2.57183	1.29e-36	0.783282	0.000235329	3.15599	1.24e-54	unbiased
AGAP001498	0	3	0	9	3	4	3	4	2	159	187	209	0.79097	0.541779	6.09793	3.6e-31	-6.11853	3.86e-24	-0.811573	0.412331	Ma_RT_specific
AGAP001499	68	90	45	374	179	178	129	194	242	151	202	117	0.806094	0.00230422	0.36419	0.120056	0.0258676	0.932698	-0.416036	0.0900376	unbiased
AGAP001500	105	82	81	374	231	268	88	134	183	143	230	131	-0.121092	0.699499	0.149817	0.502002	-0.543038	0.013892	-0.272129	0.221277	unbiased
AGAP001501	167	248	134	200	166	201	220	238	253	114	245	159	-0.233314	0.486006	0.756905	0.00333087	0.303512	0.287249	1.29373	2.55e-07	unbiased
AGAP001502	588	634	326	1454	695	861	204	228	238	132	260	220	-1.80999	3.21e-11	-1.29121	8.69e-07	-0.0573038	0.872654	0.461484	0.0857297	Fe_Ubi_weak
AGAP001503	7	3	1	125	89	58	0	5	6	23	44	23	-0.691617	0.469755	-0.674645	0.133932	-3.17863	1.75e-07	-3.16166	5.12e-08	unbiased
AGAP001504	47	42	39	8	2	3	89	122	141	30	28	35	0.766782	0.0483493	3.79326	1.3e-13	1.62701	2.86e-06	4.65349	2.42e-20	unbiased
AGAP001505	89	72	44	330	166	219	78	111	148	89	111	83	0.0329235	0.934255	-0.330734	0.201722	-0.0075087	0.981456	-0.371166	0.156156	unbiased
AGAP001506	671	884	835	9	1	12	1204	1459	2068	162	421	194	0.282273	0.417954	5.93749	2.21e-50	2.45083	3.49e-20	8.10605	2.26e-94	unbiased
AGAP001507	211	162	115	695	400	544	265	377	356	248	668	226	0.369875	0.285234	0.325634	0.256841	-0.283152	0.358126	-0.327392	0.256263	unbiased
AGAP001508	4	12	48	0	0	1	3	13	4	1	2	1	-2.41017	0.0310973	2.10546	0.148477	1.90718	0.125343	6.42281	2.99e-07	Fe_Car_specific
AGAP001509	0	0	0	0	0	1	1	2	0	0	1	0	2.25996	NA	0.366068	NA	1.22223	NA	-0.671656	NA	not_expressed
AGAP001510	1	0	0	0	0	0	0	0	0	0	0	1	-1.39256	NA	1.43019	NA	-1.2835	NA	1.53924	NA	not_expressed
AGAP001511	177	253	266	8	0	25	100	212	218	14	32	20	-1.12018	0.10442	1.85163	0.00500203	2.71158	1.02e-05	5.6834	1.62e-20	unbiased
AGAP001512	150	191	138	512	278	331	146	239	266	315	565	295	-0.241679	0.163805	1.01021	5.28e-16	-1.05388	9.95e-16	0.198013	0.169389	Ma_RT_weak
AGAP001513	31	34	28	261	176	201	44	65	75	58	95	43	0.299377	0.3698	-0.783549	0.000256387	-0.287521	0.274236	-1.37045	7.85e-09	unbiased
AGAP001514	42	47	46	326	278	265	56	80	97	64	73	52	0.0880299	0.84404	-1.25414	2.5e-06	0.0486878	0.898515	-1.29348	2.31e-06	Fe_RT_weak
AGAP001515	402	268	232	73	57	46	800	1236	784	78	268	57	0.983669	0.0371935	1.92814	6.05e-06	2.77552	1.58e-11	3.71999	2.46e-19	unbiased
AGAP001518	171	208	134	1479	923	1112	228	356	394	201	348	186	0.254885	0.111524	-1.32706	9.73e-29	0.207794	0.14303	-1.37415	1.95e-28	Fe_RT_weak
AGAP001519	269	338	196	1372	818	897	232	346	536	212	440	199	-0.220963	0.352108	-0.949052	1.21e-07	0.187382	0.375421	-0.540707	0.00299429	unbiased
AGAP001520	837	1316	1077	1854	1087	1402	1423	2605	2865	128	329	72	0.375958	0.343551	-2.19987	1.57e-12	3.56751	6.26e-31	0.991677	0.00143539	unbiased
AGAP001521	53	67	41	377	189	197	56	82	82	44	85	58	-0.210179	0.512657	-1.05218	1.53e-06	0.0332631	0.917167	-0.808735	0.000306899	Fe_RT_weak
AGAP001522	44	36	22	846	482	551	21	21	64	36	65	43	-0.656669	0.136685	-2.73173	1.71e-17	-0.692476	0.0728289	-2.76754	4.49e-17	Fe_RT_strong
AGAP001523	294	614	512	692	356	446	523	867	1107	342	612	331	0.0965606	0.80195	0.732509	0.00510015	0.730854	0.006363	1.3668	7.41e-08	unbiased
AGAP001524	12	7	8	46	14	3	23	36	36	29	45	47	1.0809	0.165267	2.03148	0.000876075	-0.600555	0.377311	0.350022	0.632351	unbiased
AGAP001525	32	51	15	807	403	432	23	41	59	42	52	37	-0.334465	0.449064	-2.62522	1.71e-19	-0.361974	0.327066	-2.65273	1.17e-18	Fe_RT_strong
AGAP001526	152	168	84	791	375	447	77	102	108	112	151	134	-1.12814	2.99e-05	-0.988976	3.33e-05	-0.708502	0.00717661	-0.569341	0.0189707	unbiased
AGAP001527	150	252	163	848	595	636	154	301	424	226	402	122	-0.0830706	0.858873	-0.600054	0.0474884	0.0208191	0.960233	-0.496164	0.103293	unbiased
AGAP001528	15	19	16	31	17	19	8	6	21	11	19	18	-1.20482	0.0281001	0.495954	0.304266	-0.703333	0.185468	0.997443	0.028332	Fe_Car_weak
AGAP001529	101	97	54	353	205	257	24	30	32	38	78	58	-2.19375	1.85e-14	-1.2733	1.49e-07	-1.20938	3.91e-05	-0.288927	0.24537	Fe_Ubi_weak
AGAP001530	28	28	26	42	16	22	26	19	51	10	13	10	-0.466356	0.375307	-0.257779	0.619437	1.28604	0.00662636	1.49462	0.000301801	unbiased
AGAP001531	9	7	1	1	1	8	1	9	6	3	4	3	-0.743832	0.566411	0.832461	0.45406	0.338703	0.787724	1.915	0.0574037	not_expressed
AGAP001532	3	7	3	0	0	0	5	7	13	16	22	9	0.266774	0.792481	6.55437	6.37e-07	-1.12461	0.0717568	5.16299	0.000142501	unbiased
AGAP001533	68	85	70	392	239	280	109	167	183	126	204	92	0.355678	0.133655	-0.181171	0.346715	-0.0749614	0.745949	-0.61181	0.0013867	unbiased
AGAP001534	77	95	94	0	42	27	21	39	66	5	39	4	-1.74877	0.120092	-0.127913	0.907025	1.29916	0.223563	2.92002	0.00205762	unbiased
AGAP001535	130	216	155	649	391	379	184	485	512	192	395	108	0.497108	0.218392	-0.160321	0.666291	0.572935	0.105065	-0.0844934	0.816372	unbiased
AGAP001536	43	91	62	30	15	33	107	278	276	76	343	34	1.01044	0.125365	3.16327	1.61e-08	0.516915	0.410611	2.66974	2.36e-06	unbiased
AGAP001537	8	14	0	287	190	223	0	3	6	38	48	63	-1.83694	0.0312354	-1.19261	0.0202513	-4.24854	4.76e-10	-3.60422	2.91e-10	Fe_RT_weak
AGAP001538	40	51	34	709	483	537	18	35	56	79	99	116	-0.907698	0.0217591	-1.54121	1.95e-07	-1.75199	1.42e-07	-2.3855	1.33e-14	Fe_RT_weak
AGAP001539	23	21	13	336	188	208	17	31	28	19	43	20	-0.260034	0.559801	-2.22	1.7e-17	-0.292757	0.416924	-2.25273	9.39e-16	Fe_RT_weak
AGAP001541	37	32	16	16	6	10	77	112	101	27	58	8	1.11955	0.029849	2.36378	3.54e-06	1.54106	0.000872591	2.78528	3.63e-08	Ma_Car_weak
AGAP001542	21	38	29	11	10	9	72	145	138	17	66	18	1.3045	0.00164591	2.51607	2.08e-08	1.68701	9.56e-06	2.89858	8.81e-11	Ma_Car_weak
AGAP001543	6	2	1	0	0	0	1	0	0	0	2	0	-3.11305	NA	2.42929	0.203713	-0.612317	0.776249	4.93002	0.00430754	not_expressed
AGAP001544	89	53	4	2446	1294	1489	10	24	8	11	23	9	-2.29929	0.00315455	-5.82549	9.27e-18	-0.157833	0.869906	-3.68403	2.33e-08	Fe_RT_specific
AGAP001545	605	694	576	1083	701	1021	380	436	647	313	557	832	-1.03582	0.0146677	0.298387	0.466814	-0.513931	0.216655	0.820279	0.0314158	Fe_Car_weak
AGAP001546	79	105	86	0	1	0	128	197	279	11	19	22	0.446909	0.195789	5.52441	8.65e-09	3.25553	9.78e-23	8.33303	4.26e-19	unbiased
AGAP001547	0	0	0	0	0	0	0	0	0	0	0	0	NA	NA	NA	NA	NA	NA	NA	NA	not_expressed
AGAP001548	524	848	392	1056	619	750	416	604	665	732	1270	776	-0.700116	6.17e-05	1.14296	3.06e-13	-0.926346	8.65e-09	0.916733	7.65e-09	Ma_RT_weak
AGAP001549	181	173	121	745	451	566	129	189	221	186	320	148	-0.497512	0.0133903	-0.50688	0.00246467	-0.470581	0.0101091	-0.479949	0.00487113	unbiased
AGAP001550	117	130	111	12	1	0	368	480	422	30	43	25	1.17077	0.000197034	3.8151	3.04e-14	3.50006	2.43e-29	6.14438	2.05e-37	Ma_Car_weak
AGAP001551	24	26	8	472	302	341	30	30	30	29	69	43	0.0169388	0.974681	-2.05667	2.55e-13	-0.795399	0.0198313	-2.869	1.01e-19	Fe_RT_weak
AGAP001552	9	2	2	0	0	2	10	6	4	6	12	5	0.0609633	0.963882	3.86658	0.00049575	-0.224918	0.837611	3.5807	0.00157328	not_expressed
AGAP001553	0	0	0	2	2	3	5	7	1	2	1	3	3.90501	0.0355079	0.723367	0.568973	0.839749	0.513449	-2.34189	0.170979	not_expressed
AGAP001554	2	4	0	0	2	0	5	5	5	6	13	6	0.704241	0.56475	4.04988	0.000107746	-0.850514	0.323255	2.49512	0.0331287	not_expressed
AGAP001555	37	51	25	583	319	344	16	27	57	34	45	31	-0.873948	0.0193682	-2.50449	3.02e-18	-0.414696	0.260609	-2.04524	1.15e-12	Fe_RT_strong
AGAP001556	72	92	67	0	0	0	45	50	99	39	27	76	-0.938264	0.137655	7.78636	3.44e-11	0.0380339	0.959662	8.76265	6.32e-14	unbiased
AGAP001557	88	126	99	118	50	81	174	383	400	110	254	78	0.884588	0.00530336	1.71299	3.4e-09	0.943183	0.00115142	1.77159	1.22e-09	unbiased
AGAP001558	11	13	16	0	0	0	32	40	70	27	49	28	1.10622	0.0149863	7.41814	5.77e-10	0.228166	0.592609	6.54008	6.28e-08	Ma_Ubi_weak
AGAP001559	125	149	125	537	351	453	209	262	288	124	255	183	0.259997	0.331633	-0.322225	0.130495	0.243436	0.295415	-0.338786	0.113815	unbiased
AGAP001560	0	0	0	0	0	0	0	0	0	11	13	16	-0.343805	0.909277	7.23635	1.03e-05	-6.82488	7.68e-05	0.755269	0.731286	unbiased
AGAP001561	23	29	20	16	13	17	36	41	54	25	37	23	0.199103	0.654638	1.80587	3.41e-07	0.416011	0.229694	2.02278	1.63e-08	unbiased
AGAP001562	18	20	22	7	5	1	48	90	102	42	102	80	1.26599	0.00240286	4.95325	5.57e-23	-0.134741	0.752109	3.55252	1.94e-11	Ma_Ubi_weak
AGAP001563	95	31	16	248	127	145	57	35	74	59	78	55	-0.394753	0.599858	-0.420094	0.478072	-0.397247	0.537114	-0.422588	0.474222	unbiased
AGAP001564	75	111	67	986	618	666	76	163	169	52	173	35	-0.00781734	0.987504	-2.31546	2.38e-12	0.548437	0.144553	-1.75921	1e-07	Fe_RT_strong
AGAP001565	18	45	39	246	137	156	55	64	62	24	53	33	0.178179	0.714397	-1.34177	3.24e-05	0.556759	0.128834	-0.963187	0.00318915	Fe_RT_weak
AGAP001566	81	147	147	34	13	28	251	541	620	161	356	117	1.14918	0.00283568	3.93017	8.33e-26	0.968321	0.00716571	3.74931	2.62e-23	Ma_Car_weak
AGAP001567	0	0	0	0	0	0	0	0	0	0	0	0	NA	NA	NA	NA	NA	NA	NA	NA	not_expressed
AGAP001568	0	3	0	1	1	0	11	18	24	12	9	6	3.30883	0.00154492	4.30369	2.13e-05	0.669323	0.349269	1.66418	0.194274	not_expressed
AGAP001569	2150	2211	1445	465	178	320	9475	13129	7096	6106	8395	4343	1.74745	4.28e-07	5.25735	1.29e-60	0.508758	0.157534	4.01866	1.09e-35	Ma_Ubi_weak
AGAP001570	41	90	64	4	2	1	340	608	491	55	99	57	2.20959	6.28e-14	5.63709	8.78e-23	2.56357	1.38e-19	5.99107	1.5e-25	Ma_Car_weak
AGAP001572	0	2	3	5	7	9	4	22	27	11	10	7	2.46392	0.0119378	1.29344	0.0860561	0.538427	0.504771	-0.632053	0.52043	unbiased
AGAP001573	17	14	10	294	151	159	18	32	22	26	52	21	0.141287	0.805366	-1.66379	1.23e-08	-0.619705	0.0907097	-2.42478	5.95e-13	Fe_RT_weak
AGAP001576	0	0	0	0	0	0	0	0	1	0	0	0	0.968312	NA	0.286997	NA	1.1039	NA	0.422586	NA	not_expressed
AGAP001577	168	180	93	703	358	425	313	611	621	202	355	181	1.12345	4.27e-08	-0.0560488	0.800718	0.846459	1.24e-05	-0.333035	0.100887	Ma_Car_weak
AGAP001578	0	0	0	0	0	0	0	0	0	1	0	2	-0.232874	NA	2.95414	NA	-2.73205	NA	0.454962	NA	not_expressed
AGAP001579	1	1	0	0	0	1	0	2	1	0	0	0	-0.0490822	NA	-0.826254	0.70536	2.40166	0.251556	1.62449	0.399129	not_expressed
AGAP001580	2	0	0	0	0	0	0	0	1	0	1	1	-1.24982	NA	2.39465	0.240545	-0.880482	0.704405	2.76399	0.168014	not_expressed
AGAP001581	3	12	13	26	3	6	35	94	79	22	32	21	2.10815	0.00098976	2.1576	0.00028824	1.18014	0.042138	1.22959	0.0573154	Ma_Car_weak
AGAP001582	204	563	350	20	5	20	421	581	570	48	62	29	-0.138317	0.802015	2.5673	4.81e-09	3.27385	7.85e-18	5.97947	3.34e-47	unbiased
AGAP001583	53	111	78	42	36	25	88	149	215	107	215	130	0.190809	0.641413	3.02201	6.67e-23	-0.234084	0.484675	2.59712	1.31e-16	unbiased
AGAP001584	54	62	37	192	122	132	43	59	95	47	67	57	-0.3218	0.338467	-0.409358	0.112652	-0.055827	0.871544	-0.143386	0.607127	unbiased
AGAP001585	88	94	47	1099	626	616	82	117	98	68	105	87	-0.2555	0.467829	-2.17143	8.62e-19	-0.0226397	0.950423	-1.93857	5.47e-15	Fe_RT_weak
AGAP001586	39	38	25	161	79	90	72	89	101	52	92	59	0.697985	0.0146778	0.268744	0.267593	0.172515	0.523794	-0.256726	0.332861	unbiased
AGAP001587	306	249	137	976	509	840	327	495	545	933	2702	995	0.3144	0.40417	1.83582	4.75e-11	-1.8599	5.16e-11	-0.338482	0.266152	Ma_RT_weak
AGAP001588	421	209	175	84	174	512	251	304	263	295	1124	357	-0.602637	0.471883	1.82093	0.0045313	-1.09842	0.109969	1.32515	0.0409682	unbiased
AGAP001589	38	37	17	244	182	186	29	28	33	46	47	41	-0.651997	0.132344	-1.20583	0.000147629	-0.804107	0.0300544	-1.35794	3.51e-05	Fe_RT_weak
AGAP001590	47	54	56	60	6	28	84	152	189	123	178	150	0.68653	0.182719	3.34323	5.07e-15	-0.372347	0.433947	2.28435	2.15e-07	unbiased
AGAP001591	1	3	6	1	0	1	15	14	18	46	74	54	1.52912	0.0286864	6.88424	5.86e-15	-2.0784	1.03e-06	3.27671	0.000991028	unbiased
AGAP001592	8	6	3	1	1	0	17	19	29	12	16	8	1.25583	0.0491305	4.62317	6.7e-07	0.636839	0.240112	4.00418	3.25e-05	unbiased
AGAP001593	0	3	0	1	1	0	5	9	0	24	27	20	1.54901	0.28739	5.52029	1.1e-06	-2.39783	0.0129153	1.57345	0.260566	Ma_RT_specific
AGAP001594	43	46	25	14	10	13	469	385	125	27	42	26	2.58471	8.5e-06	2.23317	0.000177889	3.27195	2.31e-09	2.92041	5.98e-07	Ma_Car_strong
AGAP001595	1575	1662	1137	2637	1480	2033	695	770	1234	680	1118	1373	-1.36325	3.15e-05	0.0718319	0.838852	-0.51636	0.121126	0.918717	0.00272589	Fe_Car_weak
AGAP001596	1	0	0	1	0	0	0	0	1	0	0	0	-0.456656	NA	-0.608974	NA	0.99984	NA	0.847521	NA	not_expressed
AGAP001597	59	45	44	19	15	20	98	179	222	14	40	16	1.01804	0.00184225	1.23579	0.00119123	2.62706	3.94e-16	2.84481	1.63e-16	Ma_Car_weak
AGAP001598	0	0	0	0	0	0	0	0	1	0	0	0	0.968312	NA	0.286997	NA	1.1039	NA	0.422586	NA	not_expressed
AGAP001599	2	1	2	1	0	0	3	6	7	1	2	0	0.926253	0.489436	1.92613	0.200098	2.08911	0.0797821	3.08899	0.0253508	not_expressed
AGAP001600	62	56	45	119	51	88	82	103	129	31	71	27	0.267423	0.430511	-0.0738569	0.815317	1.12213	3.89e-05	0.780853	0.00308867	unbiased
AGAP001601	155	135	117	73	34	64	130	161	250	33	81	36	-0.29254	0.367059	0.719406	0.0146067	1.66852	7.72e-10	2.68047	1.97e-24	unbiased
AGAP001602	6	10	12	16	3	14	82	91	38	21	28	41	2.2673	0.001114	2.47486	0.000109162	1.02245	0.11364	1.23001	0.078039	Ma_Ubi_specific
AGAP001603	42	33	19	299	153	206	995	1018	256	62	97	44	4.01238	1.34e-12	-0.730168	0.206184	3.39004	3.58e-10	-1.35252	0.01637	Ma_Car_strong
AGAP001604	249	402	318	930	611	762	272	751	635	242	901	130	0.0401935	0.952688	-0.13057	0.799697	0.325091	0.533188	0.154328	0.75708	unbiased
AGAP001605	0	3	0	0	0	2	1	2	0	0	0	0	-0.255264	NA	-1.24948	0.558521	2.14881	0.322272	1.1546	0.575821	unbiased
AGAP001606	117	228	131	278	201	300	260	477	378	250	421	264	0.576245	0.052901	1.17681	2.82e-06	0.0433367	0.898595	0.643898	0.0136178	unbiased
AGAP001608	217	394	233	934	654	704	299	636	859	301	701	234	0.367189	0.301266	-0.0498606	0.875337	0.347652	0.267886	-0.0693982	0.823537	unbiased
AGAP001609	86	137	79	417	245	292	170	238	260	102	163	73	0.490042	0.0220238	-0.56164	0.00240617	0.793323	2.74e-05	-0.258358	0.182658	unbiased
AGAP001610	117	74	107	14	71	107	75	90	97	19	65	23	-0.867764	0.284036	-0.192731	0.800629	1.19181	0.0924723	1.86684	0.0040557	unbiased
AGAP001611	38	28	18	218	106	130	36	29	59	81	73	73	-0.102458	0.870464	0.0652311	0.872662	-1.15055	0.0030504	-0.98286	0.0104549	unbiased
AGAP001612	77	85	80	269	162	173	63	93	116	76	101	91	-0.532654	0.061048	-0.178324	0.48457	-0.240536	0.385524	0.113794	0.665387	unbiased
AGAP001613	233	292	200	1074	651	803	281	348	434	290	532	303	-0.11286	0.521844	-0.235367	0.0637672	-0.272083	0.0455931	-0.394591	0.00191893	unbiased
AGAP001614	4	7	3	89	49	44	8	10	14	8	22	17	0.507595	0.501688	-0.988886	0.0158449	-0.74701	0.143926	-2.24349	1.17e-05	unbiased
AGAP001615	76	85	46	758	540	633	51	97	131	176	253	195	-0.267589	0.416802	-0.672201	0.00261886	-1.43759	1.25e-09	-1.8422	2.18e-15	unbiased
AGAP001616	320	385	250	569	282	376	501	669	609	244	455	202	0.25968	0.249805	0.489211	0.00890513	0.835517	5.84e-06	1.06505	3.45e-09	unbiased
AGAP001617	235	321	195	606	287	355	349	525	533	150	398	114	0.249225	0.442973	-0.0398783	0.888273	0.986389	0.00010019	0.697286	0.0051503	unbiased
AGAP001618	11	9	7	3	2	2	14	21	39	2	2	1	0.729454	0.267985	0.464128	0.650097	3.50305	4.94e-06	3.23773	6.11e-06	unbiased
AGAP001619	3	2	2	0	0	0	8	6	6	1	1	0	0.900738	0.464204	2.53593	0.14106	2.97625	0.0149506	4.61144	0.00273317	not_expressed
AGAP001620	0	1	1	0	1	0	0	3	0	3223	4558	4942	-0.179597	0.918915	13.5945	4.56e-42	-11.9795	2.14e-49	1.79459	0.189413	Ma_RT_specific
AGAP001621	478	550	321	265	186	295	116	132	124	122	292	136	-2.46358	5.35e-21	0.42047	0.123261	-0.671569	0.0164652	2.21249	6.03e-19	Fe_Car_strong
AGAP001622	7233	4117	3219	539	188	392	10991	14316	15477	8292	11218	6300	0.808956	0.0344454	5.50551	8.9e-65	0.449254	0.223938	5.14581	1.27e-56	unbiased
AGAP001623	18	31	7	443	250	165	17	22	37	48	65	34	-0.197559	0.763964	-1.548	4.75e-05	-1.17683	0.00667202	-2.52727	5.03e-10	Fe_RT_weak
AGAP001624	115	145	101	95	38	41	268	377	486	58	77	40	0.963027	2.79e-05	1.00089	8.26e-05	2.46065	7.68e-28	2.49851	1.3e-26	unbiased
AGAP001625	0	2	0	8	4	5	4	4	5	2	5	2	1.8519	0.172807	0.00329881	0.99723	0.36365	0.729836	-1.48495	0.200356	not_expressed
AGAP001626	0	1	0	83	33	36	0	0	0	10	16	13	-1.57516	0.471542	-0.937411	0.067192	-5.86012	3.76e-05	-5.22237	5.69e-06	unbiased
AGAP001627	359	403	289	2827	1361	1659	205	270	457	39	129	37	-0.876571	0.00282277	-3.94249	5.07e-48	2.04235	3.57e-13	-1.02357	8.16e-05	Fe_RT_strong
AGAP001628	11	27	7	1	7	39	34	45	25	33	62	29	0.662001	0.558621	2.07003	0.0148162	-0.33916	0.740758	1.06887	0.232176	unbiased
AGAP001629	62	87	43	193	119	163	106	109	91	34	53	46	0.0911646	0.85057	-0.862419	0.00698127	1.02436	0.00187045	0.0707776	0.834969	unbiased
AGAP001630	1594	1670	1224	1035	532	764	6119	7684	6416	711	1185	571	1.53926	7.69e-13	1.02367	1.33e-06	2.88674	4.28e-45	2.37115	1.45e-30	Ma_Car_weak
AGAP001631	0	1	0	0	0	0	0	0	2	0	1	0	0.205439	NA	1.28126	NA	0.517343	NA	1.59316	NA	not_expressed
AGAP001632	21	35	32	5	4	6	29	57	109	10	24	10	0.376581	0.501151	2.36682	3.45e-05	1.88446	4.28e-05	3.87471	5.89e-13	unbiased
AGAP001633	4043	6901	5487	360	142	209	6891	14827	14380	3293	7401	2045	0.413021	0.295156	5.02941	3.04e-60	1.34889	2.2e-05	5.96528	2.07e-84	unbiased
AGAP001634	65	62	48	36	3	6	68	88	87	22	78	23	-0.179429	0.813364	2.39538	1.38e-05	0.914153	0.098906	3.48897	8.04e-11	unbiased
AGAP001635	248	158	116	15	7	6	77	65	92	10	21	13	-1.78148	4.5e-06	1.57938	0.00172731	2.23497	1.72e-07	5.59582	1.58e-37	Fe_Car_weak
AGAP001636	57	40	26	1080	623	678	21	32	36	30	57	41	-1.13988	0.000622869	-3.24822	1.05e-37	-0.734508	0.0225587	-2.84285	5.26e-29	Fe_RT_strong
AGAP001637	28	19	5	0	0	1	175	278	224	15	31	19	3.04842	1.08e-11	5.83255	4.67e-09	3.17764	5.9e-14	5.96178	2.14e-09	Ma_Car_strong
AGAP001638	58	69	69	5	19	68	52	67	72	12	64	15	-0.698289	0.464204	0.572486	0.480859	1.03365	0.20227	2.30442	0.00161051	unbiased
AGAP001639	126	193	110	572	261	352	219	281	314	913	1325	1450	0.284229	0.428971	2.68112	2.03e-25	-2.43353	1.06e-20	-0.0366394	0.90457	Ma_RT_strong
AGAP001640	18	43	33	289	115	145	35	58	86	37	57	35	0.218221	0.642425	-1.07251	0.000690486	0.220544	0.571048	-1.07019	0.000979799	Fe_RT_weak
AGAP001643	84	192	117	589	404	447	166	266	381	110	218	97	0.355864	0.274004	-0.867097	0.000764263	0.727199	0.00716571	-0.495763	0.0600992	unbiased
AGAP001644	33	47	38	227	113	114	97	123	159	59	85	63	1.00262	0.00028681	-0.133944	0.615198	0.641773	0.0101168	-0.494788	0.0566406	Ma_Car_weak
AGAP001645	197	273	127	951	558	624	283	275	331	191	293	173	-0.0216427	0.950253	-0.737617	0.00097707	0.265736	0.296275	-0.450239	0.048828	unbiased
AGAP001646	41	62	38	326	173	204	80	132	149	84	165	98	0.676127	0.00322889	-0.0685386	0.732272	-0.15044	0.480048	-0.895105	5.93e-06	unbiased
AGAP001647	0	0	0	22	6	7	0	1	0	20	18	27	0.622164	0.808804	2.00299	0.00330168	-5.66067	3.33e-06	-4.27983	0.00466683	Ma_RT_weak
AGAP001648	22	29	37	25	33	22	33	51	48	32	75	43	-0.121294	0.844217	1.73293	1.39e-05	-0.353113	0.430819	1.50112	0.000256877	unbiased
AGAP001649	11	54	35	25	17	47	27	29	56	1933	2452	2447	-0.500666	0.467835	7.12381	3.45e-48	-6.13469	2.31e-36	1.48979	0.00490719	Ma_RT_specific
AGAP001650	285	209	177	720	241	285	147	278	230	98	236	86	-0.727826	0.0534117	-0.603318	0.0743863	0.501553	0.163942	0.626062	0.0577941	unbiased
AGAP001651	59	78	59	372	173	203	71	99	113	195	259	198	-0.145083	0.65794	0.820812	5.49e-05	-1.44613	1.52e-11	-0.480238	0.0348851	unbiased
AGAP001652	623	438	512	1341	235	411	617	812	1658	271	413	194	0.1953	0.765071	-0.066824	0.894338	1.54013	0.00073875	1.278	0.00413966	unbiased
AGAP001653	3306	3571	3047	1169	643	948	6914	9671	12202	1027	2128	1193	0.83542	4.12e-08	1.57909	1.96e-27	2.53301	1.79e-71	3.27668	8.29e-117	unbiased
AGAP001654	26	27	7	194	87	99	37	48	55	26	49	25	0.579954	0.175292	-0.95125	0.0027485	0.301637	0.428361	-1.22957	0.000255981	unbiased
AGAP001655	15	28	16	199	126	120	11	25	19	28	51	32	-0.764664	0.0708522	-1.05792	0.000132118	-1.21484	0.000424527	-1.5081	6.65e-07	Fe_RT_weak
AGAP001656	33	24	16	324	198	231	13	20	30	57	83	93	-0.901417	0.0481803	-0.681536	0.0365437	-2.161	3.19e-09	-1.94112	1.56e-08	unbiased
AGAP001657	0	0	2	0	0	0	4	2	8	1	1	0	1.87113	NA	2.55332	0.163559	2.35225	0.121419	3.03445	0.0906805	not_expressed
AGAP001658	14	13	10	0	0	0	32	71	57	2	7	2	1.41466	0.00391872	4.3608	0.00106831	3.63365	2.81e-10	6.57979	2.04e-07	Ma_Car_weak
AGAP001659	1	0	0	1	0	0	2	5	1	1	1	0	1.9997	NA	1.481	0.404729	1.63355	0.32204	1.11485	0.556434	not_expressed
AGAP001660	1	2	0	0	0	0	4	5	3	859	1442	944	1.1754	0.300666	12.5284	2.17e-25	-8.24803	1.15e-70	3.10502	0.0307056	Ma_RT_specific
AGAP001661	20	30	18	3	1	4	55	70	86	24	22	22	0.972544	0.0138277	3.94974	1.51e-11	1.36777	0.000119388	4.34496	9.84e-14	unbiased
AGAP001662	387	623	315	100	68	131	559	1132	1275	333	686	153	0.474254	0.308987	2.75719	9.74e-14	1.17799	0.00199573	3.46093	4.81e-21	unbiased
AGAP001664	2	6	10	0	0	0	9	16	30	78	49	1	0.737738	0.6044	7.46109	7.19e-08	-1.47069	0.182711	5.25266	0.000216295	unbiased
AGAP001665	4	1	7	0	0	1	9	7	6	52	37	2	0.168034	0.915467	6.23373	5.91e-07	-2.07337	0.0488346	3.99233	0.00220833	Ma_RT_specific
AGAP001666	1	0	0	0	0	0	0	0	0	1	2	0	-1.77804	NA	2.82367	NA	-2.55471	NA	2.047	NA	not_expressed
AGAP001667	0	0	0	0	0	0	0	0	0	0	1	0	-0.205389	NA	1.42375	NA	-1.20522	NA	0.423919	NA	not_expressed
AGAP001668	0	0	1	0	0	0	0	0	0	7	2	1	-1.94899	NA	4.91939	0.0065034	-4.55664	0.0166709	2.31175	0.246847	not_expressed
AGAP001669	5	8	13	0	1	1	1	5	4	302	214	9	-2.01872	0.0926335	8.00992	4.61e-13	-5.67534	7.66e-09	4.35331	0.000153392	Ma_RT_specific
AGAP001670	39	47	27	122	59	97	25	27	31	40	36	29	-1.08028	0.00446497	-0.384896	0.251136	-0.579138	0.120462	0.116247	0.741971	unbiased
AGAP001671	24	39	29	7	9	32	29	89	86	51	100	23	0.396923	0.622157	2.56051	1.85e-05	0.0397968	0.960704	2.20339	0.000284538	unbiased
AGAP001672	13	17	6	0	0	1	19	28	49	2649	4085	2966	0.721392	0.112378	12.9858	9.62e-47	-6.89876	6.59e-138	5.36563	1.6e-08	Ma_RT_specific
AGAP001673	7	11	8	0	0	1	25	69	57	21	38	28	1.81787	0.0002417	6.37548	1.92e-10	0.539958	0.207715	5.09757	7.44e-07	unbiased
AGAP001674	39	61	39	6	2	3	111	203	193	39	65	22	1.1864	8.64e-05	4.32829	5.09e-18	1.81338	1.57e-10	4.95527	1.82e-23	Ma_Car_weak
AGAP001675	29	14	13	0	7	11	16	21	14	0	5	0	-0.737276	0.538587	-1.13725	0.325859	3.12344	0.00429768	2.72346	0.00320515	unbiased
AGAP001676	1	5	5	3	1	5	3601	6830	3136	67	10	5	9.13062	1.06e-23	4.02607	1.37e-05	6.67128	6.4e-16	1.56673	0.128733	Ma_Car_specific
AGAP001677	235	392	230	1149	733	730	307	460	550	227	464	208	-0.0463064	0.867099	-0.635692	0.00024125	0.372668	0.0466574	-0.216717	0.234279	unbiased
AGAP001678	749	1331	1046	317	221	314	1309	2876	3019	1735	4223	1094	0.473195	0.249805	3.82497	3.49e-32	-0.108275	0.796246	3.2435	2.13e-23	unbiased
AGAP001679	4	13	12	11	3	5	25	62	77	38	94	9	1.69786	0.022162	3.62109	8.07e-08	0.0971343	0.906229	2.02037	0.00533673	Ma_Ubi_weak
AGAP001680	0	0	0	0	1	0	0	2	0	1176	1545	1939	1.13438	0.601028	12.2877	1.65e-31	-11.0644	9.19e-32	0.0889179	0.961365	Ma_RT_specific
AGAP001681	225	256	174	668	405	477	239	392	495	443	719	448	0.0868542	0.658771	1.00569	3.8e-15	-0.752192	1.53e-08	0.166644	0.25272	Ma_RT_weak
AGAP001682	53	61	33	159	92	113	117	150	139	31	52	51	0.832295	0.00673594	-0.457343	0.116554	1.38356	7.08e-07	0.0939246	0.762217	unbiased
AGAP001683	32	63	44	272	163	186	118	280	270	67	141	54	1.54727	1.73e-07	-0.347819	0.2243	1.14813	2.71e-05	-0.746964	0.00882505	Ma_Car_weak
AGAP001684	2	3	9	0	0	2	0	0	0	0	0	1	-5.19634	0.00673212	0.0460862	0.980278	-1.50231	0.484966	3.74012	0.00985642	not_expressed
AGAP001685	76	59	37	690	430	445	18	43	50	46	88	74	-1.33402	0.000141461	-1.93873	8.62e-12	-1.1635	0.000416551	-1.76821	7.78e-10	Fe_RT_weak
AGAP001686	22	42	20	166	72	112	13	23	46	36	46	42	-0.727378	0.111998	-0.465948	0.196769	-0.89752	0.0223465	-0.63609	0.0817208	unbiased
AGAP001687	22	4	1	395	122	146	1	6	7	45	85	43	-1.6091	0.0778261	-0.889621	0.184972	-3.72388	5.05e-07	-3.0044	8.9e-06	unbiased
AGAP001688	121	149	133	322	189	214	160	234	359	123	207	107	0.181596	0.500519	0.209033	0.338429	0.556848	0.00843241	0.584284	0.00421609	unbiased
AGAP001690	92	192	121	0	3	2	302	717	742	1003	1391	670	1.40151	4.13e-05	9.7765	5.76e-56	-1.05689	0.000963349	7.31811	2.07e-31	Ma_RT_specific
AGAP001694	141	184	123	672	445	494	210	339	367	187	333	167	0.353055	0.0419245	-0.311071	0.0313184	0.215488	0.175944	-0.448638	0.00227771	unbiased
AGAP001695	6	22	11	7	6	5	27	32	32	11	29	7	0.603317	0.337881	2.17451	0.000143984	0.849827	0.106664	2.42102	2.45e-05	unbiased
AGAP001696	26	48	49	1	9	8	75	189	254	84	212	44	1.26172	0.0542309	4.75555	1.89e-14	0.439301	0.497831	3.93313	4.35e-10	unbiased
AGAP001697	224	245	135	1320	621	855	192	229	338	237	325	302	-0.330025	0.273519	-0.658037	0.00533915	-0.453186	0.0766962	-0.781197	0.000927881	unbiased
AGAP001698	0	0	0	1	0	1	2	1	1	117	118	158	2.10542	0.284036	8.25836	7.12e-18	-6.75646	1.55e-16	-0.603525	0.741716	Ma_RT_specific
AGAP001699	163	124	80	297	211	207	155	241	294	86	208	119	0.219562	0.522779	0.102787	0.726957	0.546715	0.0453185	0.429939	0.10503	unbiased
AGAP001700	273	292	173	2033	1162	1247	135	195	382	232	511	220	-0.766558	0.00724899	-1.2985	1.21e-07	-0.641487	0.0162828	-1.17343	1.93e-06	Fe_RT_weak
AGAP001701	170	153	67	2495	1116	1358	130	150	142	589	739	744	-0.483759	0.247227	-0.193472	0.591764	-2.51519	9.9e-15	-2.22491	5.47e-12	unbiased
AGAP001702	26	32	20	295	140	153	24	34	42	28	41	30	-0.314051	0.433927	-1.57001	1.25e-09	-0.211182	0.545185	-1.46714	5.22e-08	Fe_RT_weak
AGAP001703	57	66	42	236	146	145	125	141	151	89	128	68	0.697191	0.00927974	0.0645138	0.804089	0.367275	0.137796	-0.265403	0.288283	unbiased
AGAP001704	38	47	40	167	81	99	54	58	73	58	93	72	-0.0996978	0.802939	0.351916	0.16334	-0.478657	0.0764474	-0.027043	0.923623	unbiased
AGAP001705	5	3	3	23	3	7	7	18	9	13	28	12	0.905451	0.31051	1.67041	0.00639541	-0.78697	0.237415	-0.0220099	0.97844	not_expressed
AGAP001706	191	223	101	482	102	182	255	371	440	85	221	80	0.39888	0.405393	0.00927194	0.982293	1.32608	0.00049916	0.936472	0.0123966	unbiased
AGAP001707	103	120	101	182	111	101	106	210	270	56	118	41	0.120776	0.748416	0.0235276	0.937387	1.24196	3.48e-06	1.14471	8.94e-06	unbiased
AGAP001708	11	12	9	0	2	3	18	27	21	7	28	9	0.387286	0.577949	3.73719	4.94e-07	0.48697	0.39578	3.83687	3.07e-07	unbiased
AGAP001710	120	131	76	507	318	307	110	199	285	108	214	73	0.150674	0.687194	-0.627686	0.0169042	0.388656	0.176663	-0.389704	0.148664	unbiased
AGAP001711	994	980	801	321	187	248	1976	2414	2619	381	624	468	0.674705	0.000689491	1.92785	5.54e-25	2.04267	5.92e-30	3.29582	1.37e-72	unbiased
AGAP001712	10	12	11	39	15	31	14	18	18	23	23	21	-0.0703242	0.918826	0.675189	0.102969	-0.663198	0.147326	0.0823156	0.86529	unbiased
AGAP001713	4438	9263	7833	1448	856	2421	7119	7340	9189	1501	3436	1061	-0.509668	0.342688	1.15118	0.00698989	1.88034	9.97e-06	3.54119	5.98e-18	unbiased
AGAP001714	0	0	0	0	0	0	0	0	0	0	0	0	NA	NA	NA	NA	NA	NA	NA	NA	not_expressed
AGAP001715	18	27	18	58	28	42	34	32	43	23	32	23	0.142534	0.775004	0.261461	0.459255	0.278702	0.460998	0.397629	0.256263	unbiased
AGAP001716	38	82	86	10	5	6	147	355	347	151	259	143	1.28033	0.00101457	5.57102	9.95e-35	0.368485	0.349624	4.65917	5.78e-24	Ma_Ubi_weak
AGAP001717	9	8	7	0	0	2	83	78	140	11	20	24	2.94545	7.98e-09	5.18152	7.36e-09	2.18892	6.34e-07	4.42499	1.62e-06	Ma_Car_strong
AGAP001718	421	567	430	637	318	487	304	520	628	176	263	146	-0.670083	0.000189118	-0.33509	0.0618467	1.07158	5.28e-10	1.40658	3.9e-18	unbiased
AGAP001719	241	434	320	49	28	86	151	225	275	77	138	115	-1.28839	0.00117128	1.94105	2.91e-07	0.727097	0.0662297	3.95653	2.96e-27	Fe_Car_weak
AGAP001720	27	35	26	144	79	106	15	19	20	20	39	24	-1.36475	8.91e-05	-1.03871	0.000105545	-0.808365	0.0188027	-0.482326	0.0762332	Fe_Ubi_weak
AGAP001721	401	654	390	1313	813	889	295	446	558	493	629	296	-0.823454	0.000583258	-0.132308	0.586497	-0.361174	0.131882	0.329972	0.144536	unbiased
AGAP001722	0	2	0	1	0	0	0	0	0	3	10	2	-2.51181	NA	4.03989	0.0077379	-4.74628	0.00752859	1.80542	0.300082	not_expressed
AGAP001723	9	5	2	4	1	6	1	5	5	21	28	21	-1.19686	0.181898	3.55513	4.8e-08	-2.87548	1.99e-05	1.87651	0.0111193	unbiased
AGAP001724	358	277	217	331	178	220	214	252	354	131	237	159	-0.735801	0.00241626	0.494296	0.0322118	0.428274	0.0752412	1.65837	1.51e-14	unbiased
AGAP001725	24	13	15	172	96	110	26	36	31	18	22	19	0.159978	0.771829	-1.68045	6.28e-07	0.431733	0.295415	-1.40869	4.41e-05	Fe_RT_weak
AGAP001726	48	57	38	342	233	191	59	141	185	166	279	114	0.689245	0.0533023	0.451871	0.125311	-0.77691	0.00971887	-1.01428	0.000765227	unbiased
AGAP001727	0	0	0	0	0	0	6	2	1	87	105	97	3.33658	0.0628962	9.42271	5.21e-12	-5.12619	3.25e-14	0.959944	0.6372	Ma_RT_specific
AGAP001728	0	0	0	0	0	0	0	0	0	505	624	716	-0.436703	0.88348	12.2465	1.05e-18	-11.7427	7.51e-16	0.940478	0.649307	Ma_RT_specific
AGAP001729	31	59	44	237	145	132	40	78	75	55	72	48	-0.161872	0.694034	-0.576549	0.0359233	-0.105704	0.76481	-0.520382	0.0648588	unbiased
AGAP001730	477	833	489	4517	2340	2679	1155	2113	2354	805	1869	585	0.957159	0.000326614	-0.667501	0.00700961	0.638255	0.0127768	-0.986405	5.11e-05	unbiased
AGAP001731	99	151	99	1140	708	812	126	279	322	398	728	420	0.345929	0.14794	0.148532	0.445787	-1.32862	3.68e-13	-1.52601	3.84e-16	unbiased
AGAP001732	34	43	33	44	29	21	65	65	106	87	147	95	0.428169	0.215377	2.74904	1.73e-23	-0.684513	0.0104089	1.63635	5.52e-08	Ma_RT_strong
AGAP001733	62	66	58	225	122	180	65	93	108	73	108	62	-0.170326	0.564294	-0.161181	0.468035	-0.08376	0.75332	-0.0746153	0.751427	unbiased
AGAP001734	152	186	130	497	252	329	128	184	293	181	330	193	-0.330764	0.126747	0.341827	0.0539955	-0.446065	0.0163149	0.226526	0.220871	unbiased
AGAP001735	2	3	0	5	3	5	6	3	4	1090	1317	1508	0.657373	0.548772	9.12977	3.59e-67	-8.38061	6.31e-57	0.0917893	0.919044	Ma_RT_specific
AGAP001736	34	54	27	145	83	110	49	69	109	22	34	28	0.301208	0.397115	-1.03823	0.000219415	1.18003	5.35e-05	-0.159401	0.592438	unbiased
AGAP001737	109	99	64	588	341	428	71	109	142	169	258	283	-0.445801	0.218221	0.0795134	0.802929	-1.42689	6.39e-07	-0.901578	0.00153669	unbiased
AGAP001738	123	108	78	456	349	407	94	82	112	88	134	119	-0.733752	0.0303491	-0.872356	0.00235732	-0.448088	0.16639	-0.586692	0.0444127	unbiased
AGAP001739	181	165	137	148	91	142	373	572	591	313	626	394	0.9804	2.46e-06	2.72578	8.28e-45	0.00707529	0.977658	1.75245	5.57e-18	unbiased
AGAP001740	0	0	0	0	0	0	0	0	0	0	0	0	NA	NA	NA	NA	NA	NA	NA	NA	not_expressed
AGAP001741	0	0	0	0	0	0	1	0	2	9	9	6	2.23905	0.313436	6.18666	9.63e-05	-3.1379	0.00907658	0.809714	0.709887	unbiased
AGAP001742	6	8	8	0	0	0	15	42	37	4	1	3	1.35383	0.0467044	4.11613	0.00326661	3.16223	8.53e-06	5.92454	8.54e-06	Ma_Car_weak
AGAP001743	43	86	54	358	229	263	94	173	182	70	144	65	0.611405	0.0197566	-0.701658	0.00125143	0.492799	0.0366848	-0.820263	0.00025692	unbiased
AGAP001744	71	120	78	258	165	212	60	79	97	51	98	79	-0.84985	0.00133645	-0.528646	0.0262298	-0.168753	0.560302	0.152451	0.544505	unbiased
AGAP001745	288	391	264	1997	1238	1455	354	406	618	444	699	430	-0.123697	0.56314	-0.625151	3.45e-05	-0.408666	0.0121507	-0.91012	2.12e-09	unbiased
AGAP001746	99	111	83	909	504	580	167	218	231	278	405	343	0.409093	0.100546	0.0433344	0.843221	-0.968134	1e-06	-1.33389	2.61e-11	unbiased
AGAP001747	164	192	127	555	279	364	226	304	263	245	388	250	0.0754639	0.789963	0.537746	0.00330107	-0.343495	0.0823407	0.118787	0.565217	unbiased
AGAP001748	21	21	12	0	0	2	128	146	51	20	27	4	2.00949	0.00580995	4.86399	7.78e-07	2.57492	0.000119113	5.42941	2.7e-08	Ma_Car_specific
AGAP001749	90	136	75	331	177	224	71	79	101	93	125	111	-0.900144	0.000529675	-0.149081	0.548408	-0.626493	0.0116278	0.12457	0.621767	unbiased
AGAP001750	0	0	0	0	0	0	0	0	0	0	0	0	NA	NA	NA	NA	NA	NA	NA	NA	not_expressed
AGAP001751	452	747	428	3816	2391	2875	494	1437	1578	297	893	203	0.374644	0.425584	-1.89799	9.79e-08	1.18337	0.00147211	-1.08926	0.00254643	Fe_RT_weak
AGAP001752	47	63	50	341	180	231	97	227	241	75	237	82	1.08557	0.000805808	-0.0731774	0.822839	0.36523	0.247558	-0.793518	0.00756748	unbiased
AGAP001753	16	17	12	105	31	43	36	53	57	23	33	37	1.01344	0.0326228	0.140915	0.747605	0.386508	0.374383	-0.48602	0.261567	unbiased
AGAP001754	257	407	239	3280	2279	2361	264	472	607	298	744	260	-0.12167	0.717943	-1.75842	4.46e-15	-0.114953	0.685945	-1.7517	7.58e-15	Fe_RT_weak
AGAP001756	22	20	10	2	1	7	18	25	44	73	92	93	0.0490834	0.943552	5.54218	1.66e-22	-1.86056	8.59e-06	3.63254	1.47e-09	Ma_RT_specific
AGAP001757	187	304	255	798	452	481	228	488	553	245	465	187	0.0317317	0.934834	-0.0344807	0.902839	0.288968	0.306503	0.222755	0.406692	unbiased
AGAP001759	412	544	402	968	611	694	400	689	965	424	844	355	-0.123218	0.636619	0.406831	0.0343787	0.134695	0.541764	0.664745	0.00038345	unbiased
AGAP001760	1060	602	526	447	275	421	731	870	775	899	1554	1369	-0.522093	0.213743	2.69177	8.74e-16	-0.872904	0.0146253	2.34096	3.13e-12	Ma_RT_strong
AGAP001761	183	148	98	1386	724	821	231	404	431	195	461	200	0.618439	0.0162532	-0.863547	7.39e-05	0.149437	0.569242	-1.33255	1.41e-09	unbiased
AGAP001762	445	470	345	866	387	469	438	670	698	338	754	389	-0.158728	0.471235	0.731655	1.02e-05	0.116273	0.553855	1.00666	9.02e-10	unbiased
AGAP001763	129	185	141	31	17	35	303	392	470	161	252	107	0.684174	0.00916594	3.54889	1.81e-38	0.979238	3.58e-05	3.84395	1.09e-44	unbiased
AGAP001764	0	0	1	1	0	0	3	1	0	0	0	0	1.15957	NA	-0.634475	0.778817	2.87851	0.169452	1.08447	0.60961	not_expressed
AGAP001765	62	56	43	187	106	123	74	103	134	633	935	442	0.260112	0.405397	3.21441	3.32e-58	-2.89676	2.64e-45	0.0575392	0.826153	Ma_RT_strong
AGAP001766	25	40	33	0	0	4	81	110	119	14	15	8	0.988893	0.00715945	3.86553	1.5e-07	2.83822	5.24e-14	5.71486	4.45e-16	unbiased
AGAP001767	2	5	4	2	2	1	6	5	7	354	524	524	0.0387164	0.969175	8.88111	8.74e-41	-6.47727	8.9e-44	2.36512	0.00354985	Ma_RT_specific
AGAP001768	17	63	48	2	0	20	336	414	561	98	92	89	2.59261	0.00131806	4.42436	9.34e-09	1.86573	0.015055	3.69748	1.98e-06	Ma_Car_strong
AGAP001769	19	106	74	1	0	19	183	177	124	27	25	20	0.69404	0.551734	2.60284	0.00497644	2.43966	0.00745932	4.34846	1.22e-06	unbiased
AGAP001773	3	13	4	1	2	1	13	27	29	4	5	1	1.12105	0.131536	2.02991	0.0327155	2.50093	0.00044125	3.40979	8.82e-05	unbiased
AGAP001774	0	0	0	0	0	0	0	0	0	0	0	0	NA	NA	NA	NA	NA	NA	NA	NA	not_expressed
AGAP001775	292	153	157	138	108	205	329	514	494	134	407	136	0.4444	0.378606	1.35426	0.000658647	0.883932	0.033745	1.79379	4.76e-06	unbiased
AGAP001776	0	0	1	0	0	0	2	1	0	0	0	0	0.800443	NA	0.344477	0.876159	2.54256	0.23876	2.0866	0.314229	not_expressed
AGAP001777	152	132	102	92	78	122	194	258	260	85	165	77	0.219839	0.548148	1.02379	0.000298145	0.963691	0.000634959	1.76764	1.26e-10	unbiased
AGAP001778	134	115	71	216	109	144	71	111	155	60	93	103	-0.619819	0.0842102	0.151127	0.663191	0.100525	0.796651	0.871472	0.00402385	unbiased
AGAP001779	34	25	19	327	168	203	41	87	89	51	88	47	0.768146	0.0152646	-0.948821	4.47e-05	0.00016409	0.999613	-1.7168	4.71e-11	unbiased
AGAP001780	494	767	451	2605	2016	2121	624	1268	1480	1008	2067	903	0.275727	0.299346	0.10119	0.669367	-0.442717	0.046594	-0.617255	0.00336129	unbiased
AGAP001781	18	10	0	415	329	321	2	4	6	9	18	6	-1.80539	0.0225951	-4.08058	6.22e-14	-1.57184	0.0312483	-3.84703	3.26e-12	Fe_RT_specific
AGAP001782	68	131	117	307	155	179	271	600	582	122	198	77	1.46343	5.38e-06	0.251475	0.451342	1.64515	4.94e-08	0.433202	0.176532	Ma_Car_weak
AGAP001783	73	73	66	660	337	350	82	128	145	110	254	101	0.0454301	0.902445	-0.616948	0.00428354	-0.545628	0.0212699	-1.20801	5.61e-08	unbiased
AGAP001786	220	423	253	3371	2630	2817	294	846	1010	223	903	176	0.517249	0.341004	-2.02206	1.46e-06	0.617685	0.186553	-1.92162	4.68e-06	Fe_RT_weak
AGAP001787	61	46	37	538	247	332	73	77	102	115	141	117	0.140892	0.736441	-0.548169	0.0385603	-0.801926	0.00435245	-1.49099	3.94e-08	unbiased
AGAP001788	44	25	10	460	292	305	25	16	23	23	49	51	-0.87636	0.153835	-2.09669	6.26e-06	-1.09682	0.038733	-2.31715	9.12e-07	Fe_RT_weak
AGAP001789	12	11	10	117	73	61	4	4	7	6	11	12	-1.78051	0.00391045	-2.12175	6.62e-07	-1.14921	0.0566955	-1.49045	0.000375248	Fe_RT_specific
AGAP001790	62	54	48	128	58	61	60	100	141	62	162	35	0.144609	0.79183	0.930913	0.0116042	0.0904337	0.847234	0.876737	0.0187045	unbiased
AGAP001791	492	538	528	502	43	193	553	939	1024	251	1349	229	-0.0318763	0.971638	2.16212	0.000298145	0.461094	0.508304	2.65509	7.13e-06	unbiased
AGAP001792	199	158	82	1075	778	803	100	143	136	66	136	71	-0.852599	0.00601687	-2.37714	8.01e-19	0.30687	0.34133	-1.21767	4.53e-06	Fe_RT_strong
AGAP001793	26	12	1	423	176	227	0	1	2	64	106	81	-3.92913	4.6e-05	-0.682251	0.230112	-6.16003	1.11e-12	-2.91315	3.21e-07	unbiased
AGAP001794	91	220	126	883	471	500	220	325	327	142	260	107	0.354264	0.286472	-0.930338	0.00036631	0.611582	0.0283796	-0.673021	0.0109283	unbiased
AGAP001795	50	70	27	596	354	419	31	39	54	150	250	203	-0.888086	0.00482468	-0.207197	0.397772	-2.51068	7.79e-23	-1.82979	9.8e-14	unbiased
AGAP001796	21	18	9	92	57	49	10	3	9	10	14	19	-1.69322	0.00742883	-1.17078	0.0195339	-1.15541	0.0572079	-0.632969	0.216078	Fe_Ubi_weak
AGAP001797	3039	2430	1872	2611	1331	1893	6691	9347	6897	6515	9853	4310	0.999939	0.000758107	2.76227	1.83e-25	0.00209981	0.995164	1.76443	4.14e-11	unbiased
AGAP001798	56	71	90	7	7	17	62	105	77	37	82	43	-0.532174	0.284264	3.1952	3.76e-12	0.430742	0.344825	4.15812	3.49e-20	unbiased
AGAP001799	2120	1347	1086	332	142	218	5773	7761	5110	4398	6707	2148	1.39281	0.000702928	5.15887	1.36e-44	0.380391	0.375843	4.14645	4.21e-29	Ma_Ubi_weak
AGAP001800	95	129	126	0	2	3	237	508	620	40	71	18	1.19625	0.00292479	5.21876	7.17e-15	3.17237	2.24e-17	7.19488	6.94e-28	Ma_Car_weak
AGAP001801	28	38	28	204	112	126	24	59	66	36	59	43	-0.0447059	0.917653	-0.706619	0.00587604	-0.142557	0.667556	-0.80447	0.00273509	unbiased
AGAP001802	755	880	650	1366	895	1084	1315	1874	1898	777	1381	714	0.488365	0.000475949	0.695174	4.64e-08	0.645696	5.14e-07	0.852505	1.85e-11	unbiased
AGAP001803	23	20	10	562	309	383	34	19	21	49	56	46	-0.0819221	0.905329	-2.02495	4.45e-08	-1.17815	0.00562119	-3.12117	6.35e-15	Fe_RT_weak
AGAP001804	175	257	196	824	511	589	305	390	458	179	313	159	0.208885	0.308804	-0.63548	6.67e-05	0.641272	0.000107038	-0.203093	0.226522	unbiased
AGAP001805	5846	6628	5043	9761	6068	8262	2723	3505	5330	2201	4170	3339	-1.29519	8.81e-10	-0.353925	0.0964724	0.00588833	0.98182	0.947153	2.7e-06	Fe_Car_weak
AGAP001806	138	124	86	534	258	310	148	278	303	101	229	59	0.360211	0.334204	-0.613492	0.0401962	0.75856	0.0134174	-0.215144	0.498215	unbiased
AGAP001807	11	13	13	0	0	5	25	27	45	17	20	27	0.685706	0.303849	4.42848	2.83e-09	0.302323	0.61633	4.0451	1.05e-07	unbiased
AGAP001809	5	4	6	3	0	5	26	20	24	134	176	180	1.54889	0.0153302	6.7811	1.14e-28	-2.99852	1.63e-12	2.23369	0.00212719	Ma_RT_specific
AGAP001810	222	290	161	904	487	573	305	410	457	261	443	285	0.14972	0.427025	-0.0237965	0.879074	0.0406915	0.82187	-0.132825	0.380734	unbiased
AGAP001811	1	1	1	1	0	0	0	3	3	3	1	6	0.203068	0.918237	3.69132	0.00928217	-1.13385	0.401932	2.3544	0.129737	not_expressed
AGAP001812	0	1	1	0	0	0	2	0	1	1	3	1	0.0471503	NA	3.7057	0.0342184	-0.665869	0.703271	2.99268	0.101373	not_expressed
AGAP001813	1103	1369	911	1792	909	1050	2247	3018	2875	1218	1786	1291	0.624175	0.000570776	1.19737	2.63e-13	0.709464	2.53e-05	1.28266	4.57e-15	unbiased
AGAP001814	4	7	10	12	5	10	5	7	17	72	81	133	-0.288575	0.758209	4.40434	1.62e-15	-3.61587	9.85e-11	1.07705	0.103293	Ma_RT_specific
AGAP001815	21	19	15	5	9	5	6	10	12	6	17	15	-1.64353	0.00433829	1.84626	0.00109686	-0.649954	0.280413	2.83983	1.28e-07	Fe_Car_specific
AGAP001816	39	49	38	234	137	124	28	33	36	48	55	79	-1.02684	0.0165964	-0.386167	0.296411	-1.18042	0.00203984	-0.539754	0.141463	unbiased
AGAP001817	13	14	5	55	32	44	9	4	7	8	19	20	-1.24682	0.0629628	-0.505191	0.318736	-1.38133	0.0180937	-0.639698	0.218075	unbiased
AGAP001818	36	32	12	170	84	94	28	23	27	26	40	30	-0.634279	0.180755	-0.85604	0.0177486	-0.475792	0.267346	-0.697553	0.05918	unbiased
AGAP001819	656	220	225	3	103	130	100	121	75	17	43	11	-2.39499	0.0155392	-1.06835	0.260407	1.92946	0.0414394	3.25611	0.000186846	Fe_Car_strong
AGAP001820	217	269	210	431	316	360	307	584	696	358	639	388	0.469705	0.0219048	1.23793	1.07e-12	-0.0453298	0.842553	0.722893	6.15e-05	unbiased
AGAP001821	25	20	10	55	9	10	38	40	49	28	46	17	0.568186	0.418303	1.35128	0.0140195	0.330956	0.596487	1.11405	0.0489458	unbiased
AGAP001822	1	0	0	2	0	1	0	0	1	1	2	5	-0.549685	NA	2.24635	0.123269	-2.77755	0.0955354	0.0184928	0.99248	not_expressed
AGAP001823	750	501	345	376	247	653	544	677	657	1142	3190	1445	-0.403381	0.443575	2.97422	3.23e-14	-1.69721	2.86e-05	1.68039	2.43e-05	Ma_RT_strong
AGAP001824	9	20	18	0	0	0	17	72	77	5	5	3	1.02672	0.125346	4.58572	0.000572646	3.28241	6.02e-07	6.84141	7.95e-08	unbiased
AGAP001825	0	0	0	0	0	0	0	0	0	0	0	0	NA	NA	NA	NA	NA	NA	NA	NA	not_expressed
AGAP001826	3496	28672	17232	109	173	2852	8924	17983	28066	1706	1866	791	-0.521645	0.739158	1.21132	0.294497	3.07149	0.00618615	4.80445	6.64e-06	unbiased
AGAP001827	340	663	314	1961	1055	1352	318	499	501	358	637	269	-0.63025	0.00904381	-0.860782	4.86e-05	-0.112754	0.666415	-0.343287	0.118445	unbiased
AGAP001828	28	37	25	42	19	29	16	50	57	10	41	9	-0.283018	0.62786	0.260503	0.60467	0.872422	0.0652568	1.41594	0.000993619	unbiased
AGAP001829	0	0	0	0	0	0	0	0	1	0	0	0	0.968312	NA	0.286997	NA	1.1039	NA	0.422586	NA	not_expressed
AGAP001830	0	0	0	0	0	0	0	0	0	0	0	0	NA	NA	NA	NA	NA	NA	NA	NA	not_expressed
AGAP001831	0	0	0	0	0	0	0	0	0	0	0	0	NA	NA	NA	NA	NA	NA	NA	NA	not_expressed
AGAP001832	0	0	0	0	0	0	0	0	0	0	0	0	NA	NA	NA	NA	NA	NA	NA	NA	not_expressed
AGAP001833	0	0	0	0	0	0	0	0	0	0	0	0	NA	NA	NA	NA	NA	NA	NA	NA	not_expressed
AGAP001834	0	0	0	0	0	0	0	0	0	0	0	0	NA	NA	NA	NA	NA	NA	NA	NA	not_expressed
AGAP001835	0	0	0	0	0	0	0	2	0	0	0	0	1.56408	NA	0.263094	NA	1.69966	NA	0.398683	NA	not_expressed
AGAP001836	0	0	0	0	0	0	0	0	0	0	0	0	NA	NA	NA	NA	NA	NA	NA	NA	not_expressed
AGAP001837	0	0	0	0	0	0	0	0	0	0	0	0	NA	NA	NA	NA	NA	NA	NA	NA	not_expressed
AGAP001838	0	0	0	0	0	0	0	0	1	0	0	0	0.968312	NA	0.286997	NA	1.1039	NA	0.422586	NA	not_expressed
AGAP001839	0	0	0	0	0	0	0	0	0	0	0	0	NA	NA	NA	NA	NA	NA	NA	NA	not_expressed
AGAP001840	0	0	0	0	0	0	0	0	0	0	0	0	NA	NA	NA	NA	NA	NA	NA	NA	not_expressed
AGAP001841	0	0	0	0	0	0	0	0	0	0	0	0	NA	NA	NA	NA	NA	NA	NA	NA	not_expressed
AGAP001842	0	0	0	0	0	0	0	0	0	0	0	0	NA	NA	NA	NA	NA	NA	NA	NA	not_expressed
AGAP001843	0	0	0	0	0	0	0	0	0	0	0	0	NA	NA	NA	NA	NA	NA	NA	NA	not_expressed
AGAP001844	0	0	0	0	0	0	0	0	0	0	0	0	NA	NA	NA	NA	NA	NA	NA	NA	not_expressed
AGAP001845	0	0	0	0	0	0	0	0	0	0	0	0	NA	NA	NA	NA	NA	NA	NA	NA	not_expressed
AGAP001846	0	0	0	0	0	0	0	0	0	0	0	0	NA	NA	NA	NA	NA	NA	NA	NA	not_expressed
AGAP001847	0	0	0	0	0	0	0	0	0	0	0	0	NA	NA	NA	NA	NA	NA	NA	NA	not_expressed
AGAP001848	0	0	0	0	0	0	0	0	0	0	1	0	-0.205389	NA	1.42375	NA	-1.20522	NA	0.423919	NA	not_expressed
AGAP001849	0	0	0	0	0	0	0	0	0	0	0	0	NA	NA	NA	NA	NA	NA	NA	NA	not_expressed
AGAP001850	0	0	0	0	0	0	0	0	0	1	0	0	-0.205389	NA	1.69478	NA	-1.48611	NA	0.414059	NA	not_expressed
AGAP001851	0	0	0	0	0	0	0	0	0	0	0	0	NA	NA	NA	NA	NA	NA	NA	NA	not_expressed
AGAP001852	0	0	0	0	0	0	0	0	0	0	0	0	NA	NA	NA	NA	NA	NA	NA	NA	not_expressed
AGAP001853	0	0	0	0	0	0	0	0	0	0	0	0	NA	NA	NA	NA	NA	NA	NA	NA	not_expressed
AGAP001854	20	17	9	281	149	165	15	8	26	36	40	45	-0.56223	0.34486	-1.24518	0.00113554	-1.56279	0.000413068	-2.24575	5.05e-08	Fe_RT_weak
AGAP001856	141	222	114	144	203	199	65	98	196	30	248	23	-1.09244	0.135614	-0.325857	0.638278	0.279839	0.710706	1.04643	0.0951476	unbiased
AGAP001858	25	51	27	140	12	9	68	152	224	73	137	15	1.33068	0.15604	1.53273	0.0562779	0.778887	0.375421	0.98093	0.233753	unbiased
AGAP001859	172	170	124	417	210	298	181	245	318	179	365	226	-0.00837803	0.974133	0.68474	3.77e-05	-0.250554	0.176821	0.442563	0.0109489	unbiased
AGAP001861	0	0	0	0	0	0	2	0	1	0	0	0	2.22263	NA	0.284607	NA	2.3611	NA	0.423072	NA	not_expressed
AGAP001862	7	13	12	0	0	1	12	39	51	7	19	6	0.895656	0.17826	4.89253	5.37e-06	1.43255	0.0132852	5.42942	3.57e-07	unbiased
AGAP001863	0	0	1	0	0	0	0	0	0	1	0	1	-1.84432	NA	2.60293	0.207566	-2.3439	0.283944	2.10335	0.310117	not_expressed
AGAP001864	14	7	24	18	7	44	14	31	41	5	52	28	0.0765567	0.948632	1.05595	0.192754	-0.12872	0.900881	0.850673	0.300471	unbiased
AGAP001865	108	106	63	257	148	151	111	92	117	74	89	92	-0.394193	0.334002	-0.0967425	0.792738	0.108912	0.788401	0.406363	0.220718	unbiased
AGAP001866	200	304	201	1436	993	1133	241	360	533	215	451	124	-0.0128837	0.974809	-1.32559	8.82e-07	0.363977	0.233704	-0.948729	0.000484157	Fe_RT_weak
AGAP001867	286	506	405	754	486	552	511	1339	1638	421	986	477	0.777095	0.0182134	0.951629	0.0010986	0.650629	0.0339167	0.825164	0.00482436	unbiased
AGAP001870	118	251	171	6	11	31	437	856	717	209	510	118	1.19898	0.0449507	4.73508	1.66e-18	1.14635	0.0365222	4.68244	4.27e-18	Ma_Car_weak
AGAP001871	17	30	10	170	93	89	11	39	54	42	83	37	0.15191	0.807093	-0.188089	0.644817	-0.88154	0.0293509	-1.22154	0.00195959	unbiased
AGAP001872	161	168	120	957	525	555	176	229	238	144	277	152	-0.141071	0.548772	-0.882626	5.86e-08	-0.00798312	0.972046	-0.749538	6.24e-06	unbiased
AGAP001873	129	172	127	472	271	310	147	336	347	110	230	96	0.236752	0.393503	-0.363128	0.102969	0.722686	0.0010963	0.122806	0.604815	unbiased
AGAP001874	128	147	98	2128	1183	1324	227	350	332	230	473	181	0.619845	0.00439326	-1.48191	5.64e-17	-0.106329	0.635546	-2.20809	5.96e-33	Fe_RT_weak
AGAP001877	127	188	137	1360	671	745	146	298	352	321	646	316	0.100421	0.737685	-0.16854	0.421443	-0.901882	6.83e-06	-1.17084	2.98e-09	unbiased
AGAP001878	30	28	23	187	107	103	21	34	30	30	50	41	-0.604656	0.117129	-0.734601	0.00815392	-0.7273	0.0263514	-0.857244	0.00317181	unbiased
AGAP001879	81	79	62	587	387	446	80	105	131	65	126	99	-0.170978	0.575177	-1.34524	3.76e-11	-0.0934759	0.733361	-1.26774	1.2e-09	Fe_RT_weak
AGAP001880	3	3	0	1	2	1	3	1	3	14	15	13	-0.367585	0.797478	4.12949	2.53e-06	-2.73159	0.000884647	1.76548	0.0949628	unbiased
AGAP001881	690	719	708	79	228	307	112	197	223	3	485	1	-2.40657	0.118895	-0.0451958	0.975027	0.333093	0.842958	2.69446	0.0412449	unbiased
AGAP001882	29	29	26	291	166	227	45	68	77	39	71	33	0.489061	0.112991	-1.32565	7.55e-10	0.214959	0.434117	-1.59976	1.43e-11	Fe_RT_weak
AGAP001883	29	46	21	669	392	421	38	114	141	17	61	14	0.87584	0.0582566	-3.1509	2.34e-16	1.48968	0.000287561	-2.53706	2.74e-11	Fe_RT_strong
AGAP001884	1886	1877	1467	1297	726	942	2504	3482	2902	593	1043	749	0.115571	0.677166	0.65185	0.00112497	1.70719	1.48e-18	2.24347	1.36e-31	unbiased
AGAP001885	24	39	31	72	51	76	21	24	33	26	33	27	-0.936455	0.0179586	-0.256282	0.473262	-0.373922	0.349624	0.306251	0.374174	unbiased
AGAP001886	133	172	95	813	495	503	133	259	248	204	487	150	0.00233175	0.995437	-0.247321	0.351916	-0.529384	0.0481735	-0.779037	0.00205043	unbiased
AGAP001887	14	16	12	152	59	106	41	45	25	34	83	40	0.792571	0.128076	-0.0725316	0.865495	-0.575523	0.179884	-1.44062	0.00061373	unbiased
AGAP001888	97	110	61	502	276	311	80	176	173	158	254	94	-0.0133752	0.972873	-0.174684	0.522241	-0.446643	0.104633	-0.607952	0.0187198	unbiased
AGAP001889	292	394	173	61	74	48	564	810	602	2312	2748	1260	0.603959	0.170796	5.94075	8.17e-61	-1.84809	3.23e-07	3.48869	2.41e-21	Ma_RT_strong
AGAP001890	39	76	59	8	80	13	467	499	524	117	122	307	2.36746	0.00798078	3.10021	0.000104673	1.07832	0.219378	1.81107	0.0270211	Ma_Ubi_strong
AGAP001891	29	41	33	23	11	14	36	49	51	50	116	46	-0.267631	0.500224	3.02745	5.85e-21	-0.783534	0.00742603	2.51154	1.22e-13	Ma_RT_specific
AGAP001892	46	32	21	1	8	4	5	18	13	7	6	3	-2.13047	0.00174606	1.09403	0.167017	0.853795	0.276345	4.0783	9.92e-10	Fe_Car_specific
AGAP001893	19	16	7	82	34	26	5	12	15	53	66	68	-1.06537	0.0818913	1.46256	0.000513058	-2.81794	3.76e-09	-0.290008	0.574536	Ma_RT_weak
AGAP001894	61	125	73	723	357	454	44	83	139	80	161	55	-0.67212	0.0673376	-1.4518	1.12e-06	-0.362077	0.305523	-1.14176	0.000145766	Fe_RT_weak
AGAP001895	67	83	57	390	230	266	79	159	207	64	188	52	0.380926	0.309147	-0.700817	0.016556	0.400893	0.21451	-0.68085	0.0212836	unbiased
AGAP001896	39	66	41	256	159	150	49	89	84	96	126	108	-0.0673504	0.876555	0.217564	0.407625	-0.830957	0.00157645	-0.546043	0.0394228	unbiased
AGAP001897	44	17	5	1140	570	626	3	9	4	33	60	37	-2.61252	0.000129091	-3.14314	4.08e-10	-3.12278	5.64e-07	-3.6534	1.31e-12	Fe_RT_strong
AGAP001898	115	117	95	246	139	196	62	96	156	74	108	81	-0.776868	0.00292565	-0.169834	0.507355	-0.0133617	0.968841	0.593672	0.0100287	unbiased
AGAP001899	1309	2532	1597	137	35	381	1849	3505	5735	803	653	190	0.28637	0.777133	2.4671	0.000322014	2.34353	0.000840663	4.52426	1.57e-11	unbiased
AGAP001900	22	29	22	212	148	165	12	22	33	18	26	28	-0.821507	0.0466595	-1.8935	6.89e-10	-0.372922	0.358338	-1.44491	2.69e-06	Fe_RT_weak
AGAP001901	35	37	34	295	167	209	47	65	63	64	66	64	0.0484451	0.914812	-0.770671	0.00373118	-0.405671	0.189827	-1.22479	1.06e-05	unbiased
AGAP001902	142	189	122	552	284	320	222	349	293	96	158	70	0.279403	0.265199	-0.881124	1.54e-05	1.23765	1.79e-09	0.0771241	0.731995	unbiased
AGAP001903	3901	4253	3351	1728	923	1341	9640	12783	14882	1387	2562	1514	1.01984	3.1e-16	1.39747	6.28e-30	2.57904	4.13e-103	2.95668	8.13e-133	Ma_Car_weak
AGAP001905	165	227	189	782	491	559	183	389	413	238	447	249	0.0391356	0.897305	-0.0464812	0.829	-0.152473	0.489151	-0.23809	0.23251	unbiased
AGAP001907	77	135	110	296	174	156	191	383	463	72	163	32	0.947459	0.0245409	-0.377418	0.350361	1.79624	1.78e-06	0.47136	0.227553	unbiased
AGAP001908	32	44	21	170	86	96	40	67	85	45	83	49	0.305712	0.366675	-0.0313818	0.904661	-0.10101	0.738273	-0.438104	0.0928653	unbiased
AGAP001909	66	49	43	543	322	365	68	84	124	152	251	199	0.108239	0.778866	-0.0553032	0.831671	-1.36181	1.18e-08	-1.52535	3.16e-10	unbiased
AGAP001910	5559	6192	4907	8050	5449	7515	2809	3508	5627	2557	4504	3962	-1.18034	2.51e-06	0.0281798	0.91615	-0.147199	0.602601	1.06132	5.86e-06	Fe_Car_weak
AGAP001911	5447	6698	5224	9554	6476	8157	2311	3147	5009	1986	3963	3065	-1.4397	1.18e-10	-0.484628	0.0294892	-0.0347455	0.905919	0.920331	1.84e-05	Fe_Car_weak
AGAP001912	1	3	1	0	0	0	0	1	3	11	19	12	-0.938138	0.518702	6.64574	2.66e-06	-3.52758	0.000187395	4.05629	0.0078622	unbiased
AGAP001913	28	24	27	3	1	1	76	100	150	100	145	198	1.30959	0.0057143	7.1965	4.65e-26	-0.75218	0.0779236	5.13473	2.38e-13	Ma_Ubi_weak
AGAP001914	129	163	101	765	426	498	279	292	279	310	527	379	0.504748	0.061255	0.498951	0.0266884	-0.681279	0.00312705	-0.687076	0.00275443	unbiased
AGAP001915	0	2	0	0	1	0	1	2	2	1	4	5	0.619426	NA	3.45994	0.0143654	-1.1551	0.398635	1.68541	0.302516	not_expressed
AGAP001916	108	124	97	403	283	328	217	568	611	103	221	53	1.32755	0.000233862	-0.593201	0.0875746	1.69695	4.01e-07	-0.2238	0.543052	Ma_Car_weak
AGAP001917	40	49	33	257	175	199	27	34	56	62	75	66	-0.742198	0.0268936	-0.657336	0.00963588	-1.05884	0.000223852	-0.973979	0.000219926	unbiased
AGAP001918	37	51	38	241	114	147	63	101	59	47	81	61	0.18268	0.679448	-0.415222	0.18003	0.051112	0.900726	-0.54679	0.0801448	unbiased
AGAP001919	432	1456	484	1934	954	1244	294	562	460	279	441	237	-1.4325	0.000124761	-1.13039	0.00118538	0.245922	0.54902	0.548038	0.124994	Fe_Ubi_weak
AGAP001920	0	0	0	0	0	0	0	0	0	0	0	0	NA	NA	NA	NA	NA	NA	NA	NA	not_expressed
AGAP001921	0	0	0	0	0	0	0	0	0	0	0	0	NA	NA	NA	NA	NA	NA	NA	NA	not_expressed
AGAP001922	0	0	0	0	0	0	0	0	0	0	0	0	NA	NA	NA	NA	NA	NA	NA	NA	not_expressed
AGAP001923	46	57	36	260	148	153	68	96	88	96	114	66	0.205622	0.560991	-0.0399768	0.881228	-0.34715	0.202031	-0.592748	0.0208002	unbiased
AGAP001924	0	0	0	0	0	0	0	0	0	0	1	0	-0.205389	NA	1.42375	NA	-1.20522	NA	0.423919	NA	not_expressed
AGAP001925	24	31	22	35	3	8	54	113	121	18	35	23	1.1791	0.0196796	1.78163	0.000310426	1.66057	0.000275773	2.2631	3.37e-06	Ma_Car_weak
AGAP001926	0	0	0	0	0	0	0	0	0	0	0	0	NA	NA	NA	NA	NA	NA	NA	NA	not_expressed
AGAP001927	0	0	0	0	0	0	0	0	0	0	0	0	NA	NA	NA	NA	NA	NA	NA	NA	not_expressed
AGAP001928	943	1010	562	6907	4471	5266	191	297	387	735	1326	888	-2.19783	6.16e-36	-1.55429	7.44e-21	-1.9837	2.03e-30	-1.34016	8.74e-16	Fe_RT_weak
AGAP001929	68	64	26	1148	759	783	34	41	41	93	145	92	-1.07064	0.000974055	-2.07384	1.35e-17	-1.69716	2e-09	-2.70036	5.74e-26	Fe_RT_weak
AGAP001930	147	246	164	3847	1900	2007	140	317	397	165	426	123	-0.111083	0.808804	-2.55081	3.9e-18	0.0936183	0.809538	-2.34611	1.79e-15	Fe_RT_strong
AGAP001931	1	0	0	0	0	0	0	0	1	1	0	0	-0.464878	NA	1.61208	NA	-0.33736	NA	1.7396	NA	not_expressed
AGAP001932	2	0	1	0	0	1	1	2	0	2	0	0	-0.527306	NA	1.42252	0.453468	0.193578	0.932122	2.1434	0.235511	not_expressed
AGAP001933	53	48	16	1215	817	901	16	36	34	326	481	389	-1.10037	0.00507593	-0.321198	0.290419	-4.03993	2.94e-37	-3.26076	9.88e-27	unbiased
AGAP001934	6	9	6	24	15	11	7	22	38	16	35	6	0.889772	0.232978	1.0263	0.0772461	0.0275906	0.970258	0.164123	0.809164	unbiased
AGAP001935	61	130	109	194	115	124	173	405	489	92	237	61	1.07129	0.00952003	0.681314	0.0767428	1.28163	0.000667235	0.891656	0.018144	Ma_Car_weak
AGAP001936	351	377	261	1252	737	831	496	1132	1239	99	288	69	0.803266	0.0186319	-1.79603	2.65e-09	2.50493	9.46e-17	-0.0943632	0.779643	unbiased
AGAP001937	32	25	11	139	81	94	20	34	40	30	51	45	-0.209448	0.679631	-0.339363	0.307582	-0.667235	0.0639727	-0.79715	0.0183019	unbiased
AGAP001938	103	89	72	748	533	573	32	71	82	60	143	95	-1.22968	2.29e-05	-1.72416	1.47e-12	-0.911664	0.00107332	-1.40615	1e-08	Fe_RT_weak
AGAP001939	161	146	94	552	433	480	108	151	162	254	409	270	-0.592806	0.0185049	0.27117	0.211157	-1.35833	1.82e-10	-0.494354	0.0219147	unbiased
AGAP001940	49	59	46	69	48	63	47	77	75	89	127	81	-0.309166	0.317822	1.66409	2.33e-13	-0.800406	0.000673351	1.17285	1.43e-06	Ma_RT_weak
AGAP001941	50	72	56	133	96	100	46	59	101	15	78	17	-0.491059	0.321808	-0.809065	0.0490461	0.822848	0.0566586	0.504842	0.211396	unbiased
AGAP001942	97	55	44	16	11	17	23	27	32	19	50	35	-1.91359	7.57e-06	2.12374	1.24e-06	-0.513417	0.270608	3.52392	3.98e-17	Fe_Car_weak
AGAP001943	296	282	189	1194	693	937	423	632	672	148	441	122	0.497135	0.120526	-1.16124	1.35e-05	1.19123	1.26e-05	-0.467141	0.0899233	unbiased
AGAP001944	147	168	117	1579	948	1084	200	293	302	269	482	270	0.210137	0.223461	-0.88498	3.81e-14	-0.554536	2.16e-05	-1.64965	2.21e-38	unbiased
AGAP001945	108	153	104	217	125	161	162	207	280	72	152	48	0.157385	0.604026	0.0025227	0.992526	1.10006	1.69e-06	0.945201	2.12e-05	unbiased
AGAP001946	24	30	19	146	90	91	37	70	57	48	77	56	0.492891	0.163611	0.10782	0.700558	-0.364732	0.201851	-0.749804	0.00788531	unbiased
AGAP001947	87	120	66	524	337	375	102	190	201	126	312	126	0.173429	0.552742	-0.257334	0.22464	-0.357754	0.11098	-0.788517	0.000160451	unbiased
AGAP001948	46	54	43	140	81	96	52	71	138	68	131	89	0.146653	0.712787	0.809172	0.00190298	-0.388286	0.178168	0.274233	0.345398	unbiased
AGAP001949	43	33	0	1185	766	823	1	2	4	298	385	306	-3.76171	3.25e-05	-0.483666	0.519574	-7.02708	8.18e-18	-3.74903	5.26e-08	unbiased
AGAP001950	14	23	7	371	247	259	3	3	6	18	39	13	-2.45156	2.3e-05	-2.74588	3.82e-18	-2.63705	6.14e-07	-2.93136	1.05e-17	Fe_RT_strong
AGAP001951	269	204	150	212	96	123	147	230	219	81	149	90	-0.738199	0.00487163	0.542712	0.0321751	0.698647	0.0058331	1.97956	2.06e-17	unbiased
AGAP001952	6	6	7	4	0	1	18	19	19	12453	16440	17062	0.86995	0.154235	13.8408	1.1e-102	-9.86103	3.73e-161	3.10987	2.57e-05	Ma_RT_specific
AGAP001953	88	131	71	265	160	197	92	163	197	191	356	237	-0.0410069	0.893335	1.27721	1.17e-13	-1.02528	1.15e-08	0.292933	0.136384	Ma_RT_weak
AGAP001954	69	89	37	778	437	556	35	56	72	61	107	51	-0.919749	0.000437829	-2.07579	2e-24	-0.629362	0.0117153	-1.7854	5.37e-18	Fe_RT_weak
AGAP001955	57	76	65	126	65	86	54	80	140	62	138	84	-0.25446	0.467367	0.973722	0.000170072	-0.27794	0.34549	0.950241	0.000322147	unbiased
AGAP001956	38	42	55	0	23	5	64	60	72	18	27	23	-0.131687	0.913506	1.86679	0.027535	1.27722	0.144211	3.2757	5.5e-05	unbiased
AGAP001957	237	285	169	1166	633	780	470	613	511	341	568	160	0.586406	0.100261	-0.363449	0.253525	0.464994	0.156706	-0.484862	0.119076	unbiased
AGAP001958	369	459	346	460	354	462	435	586	755	287	532	338	-0.0864336	0.74342	0.764382	2.51e-05	0.407568	0.0338289	1.25838	1.64e-12	unbiased
AGAP001959	65	84	73	205	141	174	121	190	194	94	135	46	0.494427	0.134045	-0.0134509	0.964617	0.68563	0.0165983	0.177752	0.557424	unbiased
AGAP001960	0	0	0	2	0	0	1	0	1	7	11	84	1.42974	0.544338	6.24075	2.54e-06	-5.48927	5.31e-05	-0.678268	0.732299	Ma_RT_specific
AGAP001961	15	23	11	0	2	2	18	38	70	28	24	25	0.628852	0.316756	4.9403	1.15e-10	0.333169	0.553675	4.64462	2.23e-09	unbiased
AGAP001962	11	6	4	1	0	4	10	20	21	17	22	21	0.572745	0.442973	4.35227	4.5e-09	-0.50679	0.380864	3.27273	3.27e-05	unbiased
AGAP001963	0	0	0	0	0	0	0	0	0	0	0	0	NA	NA	NA	NA	NA	NA	NA	NA	not_expressed
AGAP001964	67	71	43	7	4	7	44	51	78	5	14	7	-0.731909	0.0285962	1.42031	0.00653398	2.52135	2.36e-10	4.67356	4.76e-28	unbiased
AGAP001965	23	7	0	6	14	41	38	46	23	17	43	46	1.20659	0.307337	1.54814	0.105862	-0.125959	0.918229	0.215595	0.835757	unbiased
AGAP001966	50	68	0	38	69	358	437	540	252	229	413	363	2.65805	0.0472637	1.78272	0.140383	0.13714	0.929675	-0.738187	0.563892	unbiased
AGAP001967	16	13	10	199	126	138	13	17	18	29	35	25	-0.370876	0.473215	-1.40982	4.52e-07	-1.10785	0.00211785	-2.1468	5.66e-11	Fe_RT_weak
AGAP001968	20	31	22	106	77	80	17	34	42	19	23	16	-0.345907	0.424337	-1.22877	0.000113052	0.426271	0.267931	-0.456591	0.152088	unbiased
AGAP001969	1	4	1	0	1	0	967	992	10	19	0	0	6.3246	0.000647901	2.88136	0.107635	5.2132	0.00282711	1.76995	0.335317	Ma_Car_specific
AGAP001970	0	3	1	0	0	0	23	16	6	2	1	0	2.90304	0.0256528	2.95076	0.0784549	3.59022	0.00306476	3.63795	0.0252585	unbiased
AGAP001971	2508	2891	2186	7015	3364	3936	5327	6895	5232	3713	5331	4124	0.574872	0.0340567	0.899128	0.000136569	0.212919	0.434117	0.537176	0.0253082	unbiased
AGAP001972	40	58	30	252	152	177	60	90	103	36	44	26	0.316986	0.288349	-1.4925	9e-11	1.02714	3.71e-05	-0.782347	0.000532004	Fe_RT_weak
AGAP001973	206	243	174	995	521	590	226	246	391	268	395	343	-0.204031	0.484349	-0.0522689	0.832199	-0.472073	0.0410461	-0.320311	0.156168	unbiased
AGAP001974	20	30	22	3	2	3	71	109	151	23	40	30	1.49992	2.74e-06	4.34651	5.2e-15	1.58654	4.94e-08	4.43313	2.55e-15	Ma_Car_weak
AGAP001975	48	57	43	319	122	153	97	100	115	83	119	105	0.433188	0.241865	0.100665	0.755652	-0.18993	0.573767	-0.522452	0.0836302	unbiased
AGAP001976	39	47	21	138	69	85	29	40	38	37	78	77	-0.630333	0.137731	0.39109	0.251196	-1.05812	0.00261519	-0.0366966	0.920772	unbiased
AGAP001978	127	129	78	2346	1097	1170	82	179	199	104	226	102	-0.244681	0.447057	-2.46382	9.55e-28	-0.113313	0.703434	-2.33246	1.84e-24	Fe_RT_strong
AGAP001979	171	306	197	113	299	331	489	831	951	448	1382	318	1.04967	0.0785369	2.11761	2.77e-05	0.00187436	0.997718	1.06982	0.039691	unbiased
AGAP001980	150	194	79	1379	943	1100	57	160	191	38	59	18	-0.753882	0.057054	-3.96981	8.31e-31	1.56224	2.08e-05	-1.65369	4.65e-07	Fe_RT_strong
AGAP001981	294	526	348	58	13	85	743	898	701	478	868	412	0.397598	0.501688	4.37417	1.4e-22	0.293231	0.578444	4.2698	1.57e-21	unbiased
AGAP001982	24	30	24	6	5	29	143	166	125	252	555	300	1.8311	0.00122483	5.52418	3.26e-26	-1.43178	0.00514343	2.2613	4.71e-05	Ma_RT_strong
AGAP001983	7	9	6	0	0	0	2	13	8	2	5	4	-0.636822	0.497384	4.56019	0.00131992	0.789289	0.368035	5.9863	1.31e-05	unbiased
AGAP001984	1	0	0	0	1	0	3	7	7	6	24	8	2.89853	0.0491152	5.27692	7.42e-06	-1.25847	0.117633	1.11992	0.500862	unbiased
AGAP001985	23	17	27	4	4	2	43	57	84	13	39	7	0.707008	0.216655	3.24926	2.64e-07	1.51721	0.00198472	4.05946	5.3e-11	unbiased
AGAP001986	109	121	61	1103	600	656	156	216	162	225	354	205	0.259346	0.420558	-0.619276	0.00783522	-0.724265	0.00311434	-1.60289	9.78e-12	unbiased
AGAP001987	53	69	56	11	5	16	53	148	178	29	89	32	0.328498	0.516559	3.02662	1.53e-11	1.13554	0.00440827	3.83367	3.81e-18	unbiased
AGAP001988	15	14	12	1	0	0	0	0	0	0	1	2	-6.78984	3.59e-05	2.03228	0.169171	-2.65779	0.139714	6.16432	4.01e-07	Fe_Car_specific
AGAP001989	259	473	310	3	1	36	160	204	234	15	23	9	-1.39952	0.105803	1.02744	0.215571	3.36223	1.14e-05	5.78918	4.9e-15	unbiased
AGAP001990	29	26	36	2	0	1	86	114	138	9	14	5	1.17796	0.00207222	3.77716	4.04e-06	3.37975	3.93e-16	5.97895	1.23e-14	Ma_Car_weak
AGAP001991	4	11	9	1	0	0	20	38	46	8	12	6	1.4032	0.0121585	4.72052	1e-05	1.75196	0.000499507	5.06928	1.94e-06	Ma_Car_weak
AGAP001993	41	46	18	1053	564	624	29	80	92	79	154	66	0.230185	0.591606	-1.97014	1.73e-13	-0.793666	0.00935489	-2.99399	3.87e-25	Fe_RT_weak
AGAP001994	119	139	90	973	691	765	117	200	272	147	250	152	0.0577403	0.844492	-1.21998	1.56e-12	-0.138143	0.523988	-1.41586	1.93e-15	Fe_RT_weak
AGAP001995	192	231	149	1113	594	657	185	242	300	327	436	386	-0.318533	0.203849	-0.0203678	0.925227	-0.917823	5.14e-06	-0.619659	0.00187054	unbiased
AGAP001996	14	19	21	8	7	2	79	89	71	16	22	13	1.49723	0.00115781	2.47341	4.49e-06	2.05299	1.71e-06	3.02917	1.16e-08	Ma_Car_weak
AGAP001997	57	55	39	252	163	162	70	74	119	97	141	141	0.125301	0.776005	0.388098	0.176741	-0.784556	0.00749742	-0.521759	0.0793889	unbiased
AGAP001998	38	50	37	144	103	113	47	45	44	58	114	106	-0.498104	0.23927	0.577387	0.0738804	-1.20791	0.000309844	-0.132414	0.720518	unbiased
AGAP001999	71	50	37	578	379	355	56	106	132	26	74	20	0.174179	0.715372	-2.58682	1.43e-15	1.13119	0.00127039	-1.6298	2.74e-07	Fe_RT_strong
AGAP002000	1	14	8	1	0	2	12	44	34	2	3	1	1.23772	0.164361	1.68532	0.143255	3.49473	8.13e-05	3.94233	7.36e-05	unbiased
AGAP002002	14	35	22	179	88	132	51	66	62	59	99	82	0.689596	0.072969	0.254995	0.400822	-0.630312	0.0424329	-1.06491	0.000793831	unbiased
AGAP002003	33	58	25	135	62	97	30	36	58	17	49	25	-0.554352	0.14794	-0.758073	0.0167001	0.266386	0.484966	0.0626653	0.850625	unbiased
AGAP002004	28	27	18	338	188	208	8	12	23	28	50	45	-1.44454	0.000415559	-1.5896	1.11e-08	-1.7523	1.35e-06	-1.89736	1.82e-10	Fe_RT_weak
AGAP002005	0	1	0	0	0	0	0	1	1	0	0	0	0.310133	NA	0.330664	NA	1.84155	NA	1.86208	NA	not_expressed
AGAP002006	6	16	11	0	1	0	24	51	94	1	7	2	1.58805	0.0125456	3.27247	0.00504908	3.77568	3.53e-08	5.46009	4.33e-07	Ma_Car_weak
AGAP002007	35	40	33	7	3	4	81	126	157	98	180	30	1.03694	0.0400296	5.19568	3.48e-21	0.106236	0.847424	4.26498	3.36e-14	Ma_Ubi_weak
AGAP002008	25	53	15	5	4	42	45	59	58	23	35	35	0.22553	0.83867	1.71414	0.0231888	0.544154	0.520328	2.03277	0.00632162	unbiased
AGAP002009	0	1	3	2	2	0	1	5	5	693	1146	648	0.658557	0.559021	9.96595	5.57e-49	-7.9789	3.76e-62	1.32849	0.187859	Ma_RT_specific
AGAP002010	97	55	59	5	37	38	47	69	45	25	46	13	-1.02375	0.210124	0.719923	0.327836	0.816624	0.282889	2.5603	0.000127429	unbiased
AGAP002011	58	30	31	0	0	3	150	194	265	19	27	19	1.63959	1.94e-05	4.94339	2.51e-10	2.9754	2.62e-15	6.2792	2.5e-16	Ma_Car_weak
AGAP002012	76	68	50	27	18	27	74	124	150	49	106	38	0.142295	0.708112	2.28911	4.09e-14	0.67182	0.0163927	2.81864	5.33e-21	unbiased
AGAP002013	1	7	5	4	1	4	11	20	22	42	79	45	1.319	0.0344454	5.03491	1.57e-19	-1.84601	1.27e-06	1.86991	0.00703608	unbiased
AGAP002014	110	160	113	164	118	160	111	140	156	95	164	115	-0.56856	0.020718	0.687761	0.00152855	-0.0809284	0.766486	1.17539	2.76e-08	unbiased
AGAP002015	1103	1831	1471	2396	1470	1600	1357	2967	3803	1080	2286	717	0.13348	0.755719	0.441095	0.150714	0.796822	0.00903372	1.10444	0.000146052	unbiased
AGAP002016	174	245	179	353	171	242	212	326	308	218	332	176	-0.16663	0.478038	0.88821	4e-07	0.0205822	0.931123	1.07542	8.95e-10	unbiased
AGAP002017	8	8	12	140	74	91	8	22	20	21	21	24	0.103805	0.889549	-1.17325	0.00179504	-0.692269	0.131537	-1.96933	3.29e-06	Fe_RT_weak
AGAP002018	50	72	48	243	157	171	41	62	107	33	79	62	-0.400257	0.271271	-0.773394	0.00600268	0.0254964	0.949192	-0.347641	0.234428	unbiased
AGAP002019	55	56	41	501	275	306	77	78	110	75	121	76	0.138873	0.669242	-1.02484	2.39e-07	-0.235348	0.337085	-1.39906	4e-11	Fe_RT_weak
AGAP002020	1255	1002	793	475	252	378	2118	2307	1859	406	647	495	0.429014	0.223696	1.46271	3.47e-07	1.85034	8.75e-11	2.88404	1.02e-24	unbiased
AGAP002021	45	24	18	435	171	206	74	130	160	99	138	74	1.33841	0.000407018	-0.362842	0.283163	-0.0209457	0.963164	-1.7222	3.7e-07	unbiased
AGAP002022	63	61	41	347	148	165	33	48	63	117	182	102	-0.876941	0.0033056	0.27814	0.253137	-1.6915	2.03e-11	-0.536416	0.0317929	unbiased
AGAP002023	49	37	17	920	528	655	8	22	19	18	46	20	-1.73583	1.71e-05	-3.72037	1.21e-32	-0.948659	0.0197869	-2.9332	5.6e-22	Fe_RT_specific
AGAP002024	112	185	152	659	414	446	207	447	490	167	412	131	0.615836	0.0615135	-0.246018	0.417226	0.524307	0.081824	-0.337548	0.254957	unbiased
AGAP002025	2	3	3	7	3	7	6	6	11	4	23	19	0.795709	0.440112	2.29289	0.000650885	-1.15535	0.0993269	0.341828	0.706457	unbiased
AGAP002026	61	74	45	141	47	66	75	89	138	62	106	76	0.0739854	0.864181	0.961957	0.000433765	0.0799016	0.816841	0.967874	0.000505085	unbiased
AGAP002028	239	352	291	449	194	262	383	739	846	388	760	349	0.433563	0.0824007	1.67179	1.1e-15	0.186748	0.440725	1.42498	1.52e-11	unbiased
AGAP002030	276	433	288	2168	1354	1432	361	714	864	386	803	333	0.247695	0.342561	-0.809477	5.06e-05	0.148662	0.532375	-0.90851	5.62e-06	unbiased
AGAP002031	0	0	0	0	0	0	0	0	0	0	0	0	NA	NA	NA	NA	NA	NA	NA	NA	not_expressed
AGAP002032	341	389	337	12	9	12	480	754	1197	116	156	78	0.447098	0.13373	4.29657	2.18e-34	2.52375	1.29e-23	6.37323	3.56e-77	unbiased
AGAP002033	10	4	2	1	4	1	12	11	16	7903	11163	10756	0.593983	0.412066	12.9363	6.2e-98	-9.74673	5.74e-128	2.59559	0.000387324	Ma_RT_specific
AGAP002035	203	232	183	492	277	369	265	402	478	181	312	182	0.199499	0.231125	0.192145	0.173578	0.548927	5.7e-05	0.541573	5.21e-05	unbiased
AGAP002036	148	155	110	342	172	231	171	373	354	166	388	146	0.41193	0.132235	0.804691	0.000353108	0.188497	0.467888	0.581258	0.012189	unbiased
AGAP002037	26	34	13	130	64	82	14	7	17	10	19	24	-1.52515	0.00399809	-1.34749	0.0021385	-0.68956	0.200648	-0.511902	0.250904	Fe_Ubi_weak
AGAP002038	181	218	174	193	142	126	47	77	138	51	87	39	-1.85618	1.05e-11	-0.472221	0.101105	0.325839	0.308689	1.7098	1.47e-11	Fe_Car_weak
AGAP002039	94	86	70	0	1	2	264	361	476	294	357	329	1.43898	4.41e-07	8.8065	1.51e-35	-0.115472	0.716863	7.25205	3.42e-24	Ma_Ubi_weak
AGAP002040	22	48	41	19	12	19	54	131	135	138	273	184	0.79358	0.0399983	4.468	1.3e-36	-1.14062	0.000326879	2.5338	2.31e-11	Ma_RT_specific
AGAP002041	12	18	21	6	5	4	25	102	127	6	26	4	1.46956	0.02348	1.95763	0.0048466	2.60123	1.43e-05	3.0893	2.89e-06	unbiased
AGAP002043	2	3	2	0	1	5	18	16	19	10	15	16	2.22307	0.00908991	3.53943	4.38e-06	0.160578	0.833025	1.47694	0.11602	unbiased
AGAP002044	0	0	1	0	0	0	0	3	0	0	0	0	0.4063	NA	0.166333	NA	1.77062	NA	1.53065	NA	not_expressed
AGAP002045	1	3	0	0	0	0	0	0	1	0	0	0	-1.99866	NA	0.380774	0.864888	1.22838	0.596716	3.60782	0.0682555	not_expressed
AGAP002046	0	0	0	0	0	0	0	0	2	0	0	0	1.48338	NA	0.268704	NA	1.61897	NA	0.404293	NA	not_expressed
AGAP002047	396	492	375	794	498	526	581	1154	1109	547	1131	482	0.465712	0.0219148	1.14024	7.03e-11	0.214033	0.280444	0.88856	5.52e-07	unbiased
AGAP002048	72	102	57	1546	1004	1213	76	146	161	171	335	181	0.0456715	0.881612	-1.53817	9.7e-24	-1.0507	1.43e-09	-2.63454	1.29e-53	Fe_RT_weak
AGAP002049	124	144	149	8	2	6	161	212	314	20	26	30	-0.00195752	0.996373	3.18076	4.9e-11	2.88261	3.75e-18	6.06533	6.68e-41	unbiased
AGAP002050	53	54	42	62	7	9	50	98	136	28	92	16	0.185529	0.836376	1.74778	0.00466826	0.941257	0.145494	2.50351	3.28e-05	unbiased
AGAP002051	41	53	34	25	4	10	61	84	106	30	106	32	0.298045	0.54728	2.97411	1.4e-12	0.479001	0.237165	3.15506	7.29e-14	unbiased
AGAP002052	4	2	2	3	0	2	27	61	48	28	29	5	3.27567	4.41e-05	4.35601	1.05e-07	0.893937	0.171743	1.97428	0.0395662	unbiased
AGAP002053	153	167	112	0	0	0	233	259	410	2	0	7	0.38881	0.298248	3.89707	0.00185526	6.28915	9.89e-32	9.79741	9.21e-18	unbiased
AGAP002054	287	420	335	232	140	179	591	927	1105	437	908	313	0.630252	0.0110783	2.45607	5.78e-29	0.504241	0.0296271	2.33006	7.51e-26	unbiased
AGAP002055	16	11	7	4	1	1	10	12	9	4	12	11	-0.754278	0.306884	2.9887	0.000115498	0.0277758	0.972046	3.77075	6.02e-07	not_expressed
AGAP002056	28	33	21	9	4	13	38	74	89	16	18	8	0.588373	0.166611	1.61348	0.000627085	1.99268	2.79e-07	3.01779	3.17e-12	unbiased
AGAP002058	9	13	7	8	6	15	5	4	4	38	35	9	-1.7037	0.039596	2.36794	0.00014647	-2.75748	7.8e-05	1.31417	0.0521987	unbiased
AGAP002059	155	180	96	470	260	335	163	244	228	131	256	174	-0.0874143	0.758209	0.0284289	0.89246	-0.0170969	0.948425	0.0987462	0.641409	unbiased
AGAP002060	33	60	51	11	2	4	116	182	223	96	216	75	1.14779	0.000868217	5.32782	9.34e-33	0.273404	0.429699	4.45343	2.53e-22	Ma_Ubi_weak
AGAP002061	201	230	143	956	567	655	183	237	312	302	498	359	-0.317889	0.100784	0.0556656	0.748601	-0.889333	1.52e-08	-0.515779	0.00101175	unbiased
AGAP002062	20	38	13	125	66	90	97	84	65	44	60	48	1.25329	0.00612267	0.110772	0.804773	0.543878	0.203844	-0.598636	0.160357	unbiased
AGAP002063	607	516	394	3208	1520	1815	115	194	274	142	364	302	-2.09265	4.64e-12	-2.02047	1.64e-12	-0.717925	0.022421	-0.645748	0.0282133	Fe_RT_weak
AGAP002064	38	20	18	167	32	35	68	68	56	22	22	19	0.707429	0.317556	-0.687298	0.251575	1.38293	0.0196696	-0.011796	0.985257	unbiased
AGAP002065	50	51	54	368	78	118	82	110	111	61	72	84	0.276538	0.644523	-0.196169	0.684562	0.205659	0.6931	-0.267048	0.572156	unbiased
AGAP002066	30	28	19	283	177	180	27	57	70	35	88	44	0.290837	0.461654	-1.0281	3.76e-05	-0.317831	0.301355	-1.63677	2.36e-09	Fe_RT_weak
AGAP002067	174	240	169	320	186	216	217	249	284	105	179	167	-0.280323	0.346754	0.309258	0.215855	0.514303	0.039929	1.10388	1.68e-06	unbiased
AGAP002068	15	33	32	44	21	20	34	39	60	376	580	528	0.0382533	0.947046	5.11477	3.21e-51	-3.71616	1.12e-29	1.36035	0.000433266	Ma_RT_strong
AGAP002069	12	21	9	4	1	3	14	12	35	6	3	3	-0.128388	0.886311	1.53114	0.0629751	1.98985	0.00339333	3.64938	3.07e-07	unbiased
AGAP002070	10	12	24	0	0	0	24	33	46	5	2	5	0.395069	0.627541	4.57718	0.000680113	2.71666	9.42e-05	6.89877	8.57e-08	unbiased
AGAP002071	444	326	286	393	58	107	348	504	577	166	401	164	-0.258585	0.674245	1.43347	0.0012125	0.818513	0.081824	2.51056	6.07e-09	unbiased
AGAP002072	8	10	3	3	0	0	4	10	5	7	19	14	-0.759831	0.391367	4.3805	1.48e-06	-1.23953	0.0759036	3.9008	3.02e-05	unbiased
AGAP002073	63	65	55	411	174	209	63	105	103	62	119	63	-0.121378	0.726507	-0.724285	0.00115346	-0.0418525	0.894988	-0.644759	0.00484938	unbiased
AGAP002074	1	3	2	86	35	60	4	2	3	23	43	26	-0.0928396	0.939135	-0.00657102	0.986868	-3.45575	3.19e-09	-3.36948	2.17e-07	unbiased
AGAP002075	17	9	0	309	184	209	1	1	0	190	230	226	-3.71036	0.00028899	0.891554	0.0633288	-7.91777	4.81e-19	-3.31585	5.3e-10	unbiased
AGAP002076	21376	22861	15318	47056	29297	34057	5326	7505	12414	10368	17986	13359	-1.94379	1.12e-23	-0.442473	0.0256613	-0.988948	3.87e-07	0.512372	0.00872204	Fe_Car_weak
AGAP002077	40	42	33	293	139	130	26	28	29	37	41	35	-1.11626	0.00324476	-1.27101	3.41e-05	-0.668397	0.0694254	-0.823146	0.00792961	Fe_RT_weak
AGAP002078	43	61	42	220	119	133	59	49	54	48	74	72	-0.455883	0.265199	-0.273517	0.413496	-0.448099	0.20778	-0.265733	0.432703	unbiased
AGAP002079	22	21	18	2	8	4	29	55	50	22	64	15	0.432782	0.477743	3.50737	3.6e-10	0.299929	0.572581	3.37452	2.88e-09	unbiased
AGAP002080	0	0	1	0	1	0	0	0	1	9	12	18	-0.575031	0.814194	5.561	1.3e-05	-5.04836	0.000199699	1.08767	0.536615	unbiased
AGAP002081	141	189	126	526	354	397	125	263	373	254	483	267	0.00944333	0.976628	0.565284	0.00799141	-0.648979	0.00332432	-0.0931385	0.703773	unbiased
AGAP002082	34	68	42	276	142	151	112	183	216	71	200	71	1.14253	0.000167881	0.150563	0.612644	0.437319	0.130143	-0.554644	0.0533888	unbiased
AGAP002083	10	19	17	0	0	1	34	63	106	3	6	3	1.38728	0.00643388	3.58167	0.00129152	3.76805	7.33e-11	5.96244	8.74e-09	Ma_Car_specific
AGAP002084	188	260	161	966	520	659	182	297	355	209	492	139	-0.228326	0.484079	-0.485926	0.0510808	-0.143189	0.625821	-0.400789	0.110606	unbiased
AGAP002085	164	279	169	52	48	86	574	842	703	372	871	473	1.15583	0.000445222	4.02668	1.85e-39	0.162936	0.651058	3.03378	2.18e-22	Ma_Ubi_weak
AGAP002086	100	95	60	905	575	723	142	205	238	144	249	131	0.522694	0.0116501	-1.14623	5.98e-13	-0.0403326	0.857766	-1.70926	1.5e-23	Fe_RT_weak
AGAP002087	37	25	12	111	62	53	23	23	36	32	46	29	-0.504374	0.316472	-0.0974157	0.817206	-0.592804	0.160788	-0.185846	0.658427	unbiased
AGAP002088	102	85	53	599	348	456	18	25	38	39	84	61	-2.23909	2.48e-13	-1.97886	4.15e-15	-1.39407	6.28e-06	-1.13384	5.08e-06	Fe_RT_weak
AGAP002089	27	49	38	0	0	0	100	179	232	32	46	19	1.44617	1.82e-05	7.15645	4.82e-10	2.15315	1.8e-11	7.86343	6.05e-12	Ma_Car_weak
AGAP002090	32	36	34	0	0	1	71	123	139	6	10	2	0.996909	0.0034295	4.08725	8.12e-05	3.97365	7.5e-20	7.06398	4.2e-13	unbiased
AGAP002091	1063	1800	1010	420	266	406	48	108	138	160	272	160	-4.40335	1.01e-80	0.044311	0.867988	-1.26011	3.35e-07	3.18755	2.28e-48	Fe_Car_strong
AGAP002092	38	59	52	255	121	144	85	107	137	290	426	390	0.457624	0.181521	2.11133	9.06e-18	-1.99759	2.92e-15	-0.343882	0.237689	Ma_RT_weak
AGAP002093	371	561	463	543	532	604	311	481	510	922	2526	822	-0.785115	0.0205553	2.10367	3.82e-13	-1.80573	9.3e-10	1.08306	0.000255484	Ma_RT_weak
AGAP002094	52	45	53	265	172	186	47	106	128	69	124	44	0.146544	0.746932	-0.496631	0.105318	0.0304574	0.941136	-0.612718	0.0469394	unbiased
AGAP002095	86	92	66	726	355	389	109	226	232	112	209	92	0.509613	0.0467502	-0.881238	1.88e-05	0.250236	0.297424	-1.14061	7.7e-08	unbiased
AGAP002097	92	78	68	538	318	349	93	136	176	98	153	116	0.0663625	0.841491	-0.741225	0.000192316	-0.099932	0.69531	-0.90752	9.35e-06	unbiased
AGAP002098	6	3	1	76	46	41	10	6	3	15	14	20	0.34145	0.757365	-0.670126	0.268632	-1.51956	0.0247299	-2.53113	0.00024287	unbiased
AGAP002099	44	51	35	472	220	273	44	57	87	53	74	48	-0.152368	0.668235	-1.46598	1.91e-11	-0.130132	0.658704	-1.44375	2.25e-10	Fe_RT_weak
AGAP002100	21	17	13	403	258	328	9	16	29	300	407	401	-0.626845	0.203238	1.15778	3.69e-05	-4.63389	2.1e-43	-2.84926	4.91e-17	Ma_RT_weak
AGAP002101	378	474	340	1676	953	1198	179	304	461	327	669	297	-1.05494	7.52e-08	-0.655957	0.000321323	-0.662196	0.000578444	-0.263217	0.166521	unbiased
AGAP002102	1069	1059	871	0	0	1	2088	2475	3925	1	1	2	0.798882	0.0016024	2.00613	0.0797641	10.4906	1.42e-56	11.6978	2.44e-39	unbiased
AGAP002104	16	18	9	1	0	1	71	106	124	15	23	9	2.13189	3.56e-09	4.92594	1.35e-08	2.46983	3.17e-13	5.26388	1.18e-09	Ma_Car_specific
AGAP002105	0	0	0	0	0	0	0	0	0	399	555	687	-0.433744	0.884713	12.0745	5.23e-18	-11.5737	2.88e-15	0.93455	0.652315	Ma_RT_specific
AGAP002106	32	41	30	155	58	73	37	52	52	35	62	45	-0.2118	0.610055	0.00126057	0.996954	-0.216247	0.530298	-0.00318699	0.992727	unbiased
AGAP002107	112	123	83	1140	583	699	116	109	147	107	160	153	-0.40968	0.202688	-1.50296	8.34e-10	-0.396111	0.163155	-1.48939	1.84e-09	Fe_RT_weak
AGAP002108	21	15	10	279	159	156	23	27	39	39	55	47	0.270447	0.585083	-1.07814	0.000114548	-0.900486	0.00633334	-2.24907	5.58e-12	Fe_RT_weak
AGAP002109	124	182	129	510	253	346	145	274	292	106	263	102	0.0117758	0.971096	-0.333225	0.127369	0.426728	0.0594226	0.0817273	0.729144	unbiased
AGAP002110	37	44	38	397	224	244	66	107	152	88	158	61	0.733314	0.0120135	-0.57035	0.0134092	-0.119994	0.677196	-1.42366	6.96e-09	unbiased
AGAP002111	23	33	30	142	85	91	35	67	54	38	65	42	0.172565	0.672815	-0.180828	0.523644	-0.106195	0.754096	-0.459587	0.107286	unbiased
AGAP002112	42	34	38	215	107	133	40	59	55	41	77	47	-0.252599	0.486006	-0.500333	0.0472796	-0.290839	0.329912	-0.538573	0.0388516	unbiased
AGAP002113	98	81	40	664	321	388	72	114	110	516	913	429	-0.222924	0.527824	1.38421	1.6e-09	-2.82018	3.95e-32	-1.21305	1.11e-06	Ma_RT_weak
AGAP002114	46	67	39	154	97	145	71	120	134	257	339	322	0.417309	0.21965	2.1996	1.3e-19	-1.77766	9.49e-13	0.00463874	0.988533	Ma_RT_weak
AGAP002115	31	39	35	1	0	1	81	171	199	9	28	5	1.36035	0.000669357	4.64208	1.52e-07	3.23592	1.99e-15	6.51764	2.72e-14	Ma_Car_weak
AGAP002116	4	12	14	0	0	0	21	40	44	36	44	32	1.08111	0.0524207	7.59124	4.19e-10	-0.361341	0.458924	6.14879	6.48e-07	unbiased
AGAP002117	22	28	18	178	96	116	23	21	39	33	58	66	-0.375479	0.462044	-0.300433	0.402105	-1.1658	0.00179003	-1.09075	0.00239299	unbiased
AGAP002118	90	112	74	451	261	298	64	69	105	56	121	70	-0.87977	7.18e-05	-1.09576	5.55e-09	-0.240843	0.307585	-0.45683	0.015969	Fe_RT_weak
AGAP002119	113	171	135	1004	627	673	147	351	356	103	276	56	0.292886	0.535272	-1.58321	5.37e-06	0.842397	0.0238848	-1.0337	0.00324132	Fe_RT_weak
AGAP002120	58	84	55	123	56	60	75	112	169	78	146	95	0.158119	0.636	1.39066	3.41e-09	-0.0749082	0.799364	1.15764	2.24e-06	unbiased
AGAP002121	29	32	21	367	193	241	15	26	23	43	72	72	-1.0212	0.0084026	-1.09382	3.97e-05	-1.78103	3.46e-08	-1.85365	1.49e-10	Fe_RT_weak
AGAP002122	3651	4646	3264	5686	3550	5010	1801	2148	3378	1506	2719	2626	-1.33614	4.3e-07	-0.0772883	0.791633	-0.165462	0.579571	1.09339	1.1e-05	Fe_Car_weak
AGAP002123	88	84	49	1048	653	722	89	182	167	177	360	132	0.299443	0.356739	-0.968569	2.29e-05	-0.778795	0.00161488	-2.04681	8.33e-18	unbiased
AGAP002124	4	4	7	0	0	0	9	14	16	15	8	13	0.648267	0.476307	6.23408	2.47e-06	-0.223567	0.778595	5.36224	7.04e-05	unbiased
AGAP002125	0	0	0	0	0	0	0	0	0	2	0	3	-0.25444	NA	3.80613	0.0584199	-3.54244	0.0906121	0.518134	0.809865	not_expressed
AGAP002126	0	0	0	0	0	0	0	0	0	30	29	37	-0.369112	0.90365	8.41457	7.18e-08	-7.97601	1.35e-06	0.807666	0.711659	Ma_RT_specific
AGAP002127	146	179	125	732	395	440	216	257	336	146	300	126	0.181109	0.444403	-0.531948	0.0024302	0.342237	0.0734266	-0.370821	0.0394586	unbiased
AGAP002128	189	226	161	268	137	174	415	538	562	195	271	224	0.740185	0.000335213	1.25609	6.06e-11	0.904871	1.95e-06	1.42077	1.69e-13	unbiased
AGAP002129	94	105	76	286	198	217	59	70	110	53	125	85	-0.883732	0.000728025	-0.496418	0.0335126	-0.340142	0.201851	0.0471726	0.850458	unbiased
AGAP002130	39	52	35	295	140	161	29	39	52	147	248	207	-0.743144	0.0226863	1.02046	7.11e-06	-2.56012	7.7e-24	-0.796522	0.00210352	Ma_RT_weak
AGAP002131	68	77	67	520	268	315	68	76	96	280	417	421	-0.490081	0.153184	1.04471	3.71e-05	-2.46004	9.11e-21	-0.925246	0.000627134	Ma_RT_weak
AGAP002132	19	39	31	284	151	188	22	42	45	45	102	53	-0.396459	0.289387	-0.707027	0.00348089	-1.06369	0.000141308	-1.37426	1.67e-07	unbiased
AGAP002133	10	12	9	44	29	46	11	9	12	15	18	9	-0.597481	0.337571	-0.561421	0.199587	-0.577321	0.273047	-0.541261	0.236818	unbiased
AGAP002134	1	0	0	69	10	14	1	1	0	1	4	8	0.141378	0.95064	-1.54631	0.123543	-2.54058	0.051849	-4.22826	0.00135158	not_expressed
AGAP002135	17	34	39	2	0	1	78	119	140	20	28	10	1.1785	0.00893238	4.79127	2.92e-09	2.31441	3.88e-08	5.92718	7.46e-14	Ma_Car_weak
AGAP002136	163	129	92	21	26	66	184	276	283	65	166	66	0.274048	0.650135	2.14242	1.89e-06	1.1818	0.00953234	3.05018	5.05e-12	unbiased
AGAP002137	58	78	44	31	34	40	116	147	122	30	51	34	0.479703	0.200296	1.01895	0.00306064	1.56385	1.02e-06	2.10309	7.87e-11	unbiased
AGAP002138	22	52	35	4	0	0	64	109	163	6	4	3	0.908351	0.0543959	2.47088	0.00387869	4.33375	1.55e-15	5.89628	3.12e-15	unbiased
AGAP002139	7	12	10	35	18	22	13	20	16	17	23	13	0.0888253	0.899164	0.461816	0.268748	-0.314157	0.512845	0.0588336	0.902952	unbiased
AGAP002140	15	21	14	76	39	51	34	30	27	35	54	29	0.245663	0.635494	0.464233	0.171581	-0.522981	0.158187	-0.304411	0.432656	unbiased
AGAP002141	374	334	242	811	448	585	325	468	431	339	664	380	-0.294518	0.183019	0.521474	0.00374933	-0.347889	0.0715219	0.468103	0.00995537	unbiased
AGAP002142	39	46	24	312	200	229	43	91	89	139	237	140	0.347813	0.242508	0.413541	0.0277225	-1.43134	9.24e-13	-1.36562	5.3e-10	unbiased
AGAP002143	0	0	0	113	33	25	5	8	4	542	764	642	3.39271	0.0219755	4.57426	7.1e-26	-6.96518	2.98e-38	-5.78362	4.03e-06	Ma_RT_strong
AGAP002144	31	44	20	477	293	372	26	25	38	47	68	50	-0.739126	0.0291312	-1.82736	7.83e-16	-1.10439	9.87e-05	-2.19262	6.33e-19	Fe_RT_weak
AGAP002145	232	188	194	7	0	11	421	551	539	69	148	58	0.61669	0.079245	4.73827	2.09e-26	2.32101	2.17e-14	6.4426	4.65e-49	unbiased
AGAP002146	22	19	22	2	0	1	37	61	63	14	19	11	0.649181	0.126646	4.45986	2.05e-08	1.64303	1.77e-05	5.45372	2.73e-12	unbiased
AGAP002147	17	31	26	75	37	35	26	46	61	24	52	16	0.134102	0.805857	0.241818	0.53838	0.348416	0.395147	0.456133	0.229472	unbiased
AGAP002149	807	1294	901	3355	1921	2097	848	1678	2079	735	1638	579	-0.102103	0.767195	-0.439045	0.0694598	0.458789	0.067419	0.121847	0.640812	unbiased
AGAP002150	60	116	72	17	10	7	272	528	539	56	90	54	1.74147	1.74e-12	3.47546	4.64e-24	2.49887	3.13e-25	4.23287	8.45e-36	Ma_Car_weak
AGAP002151	131	128	52	2650	1453	1652	58	84	119	88	156	86	-0.913853	0.00152913	-3.16244	1.5e-40	-0.552437	0.0481361	-2.80103	7.33e-32	Fe_RT_strong
AGAP002152	4	6	11	1	5	4	28	74	69	3	11	4	2.21478	0.000630364	1.56283	0.0404055	2.99708	1.38e-06	2.34514	0.00121109	Ma_Car_specific
AGAP002153	114	129	64	1087	620	673	139	175	216	454	693	522	0.138274	0.634745	0.473832	0.012051	-1.88232	4.41e-23	-1.54676	4.03e-15	unbiased
AGAP002154	181	145	110	1598	418	432	243	362	363	116	189	79	0.469983	0.324646	-1.59534	1.9e-05	1.14767	0.0032825	-0.917649	0.0152644	Fe_RT_weak
AGAP002155	293	398	270	682	261	350	506	751	964	122	256	128	0.521205	0.013956	-0.378111	0.0626033	1.93726	1.64e-24	1.03794	2.8e-08	unbiased
AGAP002156	340	387	284	34	11	50	227	293	410	43	75	32	-0.801477	0.0259089	1.56773	1.73e-05	2.4265	2.89e-13	4.7957	4.2e-46	unbiased
AGAP002157	343	357	231	29	14	19	760	1157	1202	315	538	269	1.07448	3.39e-11	5.09238	6.08e-103	1.28209	9.57e-17	5.3	8.89e-111	Ma_Car_weak
AGAP002159	228	318	241	65	29	52	979	1350	1192	376	668	238	1.50789	1.16e-08	4.02882	7.56e-50	1.3231	1.69e-07	3.84403	7.49e-45	Ma_Car_weak
AGAP002161	219	208	142	806	452	521	107	226	244	91	412	50	-0.687243	0.223696	-0.950737	0.0427958	0.0457626	0.941529	-0.217732	0.670516	unbiased
AGAP002162	6	13	11	62	46	55	10	10	15	15	23	21	-0.443675	0.480489	-0.515395	0.194096	-0.970266	0.0365222	-1.04199	0.0143145	unbiased
AGAP002163	0	0	0	4	0	1	1	2	1	2	0	0	2.45273	NA	-0.00481762	0.997815	0.519556	0.800746	-1.93799	0.31444	not_expressed
AGAP002164	1	0	0	2	0	1	0	0	1	2	2	0	-0.541685	NA	1.18669	0.495579	-1.72684	0.369809	0.00153471	0.999414	not_expressed
AGAP002165	2	4	5	24	8	10	3	17	13	56	81	49	0.819817	0.293691	3.12523	5.37e-13	-2.73189	2.09e-09	-0.426472	0.52321	Ma_RT_specific
AGAP002166	494	499	299	2815	1603	1858	215	312	352	418	678	290	-1.21808	1.1e-09	-1.24396	1.26e-11	-0.841472	1.72e-05	-0.867346	2.77e-06	Fe_RT_weak
AGAP002167	122	154	77	743	417	488	262	247	257	201	320	262	0.532124	0.0974157	-0.0824997	0.78647	-0.206472	0.50458	-0.821096	0.0023036	unbiased
AGAP002168	2	2	5	5	0	5	4	4	7	0	5	1	-0.000845516	0.999887	0.128781	0.914945	1.17257	0.315322	1.3022	0.216192	not_expressed
AGAP002169	106	155	85	269	161	200	194	258	237	162	238	194	0.36528	0.171743	0.894272	2.81e-05	-0.00271102	0.991424	0.526281	0.0188654	unbiased
AGAP002170	1232	1016	702	366	208	287	2194	2745	3255	390	705	464	0.809841	0.000188729	1.80303	8.3e-19	2.19227	1.22e-28	3.18546	2.53e-57	unbiased
AGAP002171	342	290	160	1059	416	538	27	54	69	76	252	106	-3.07879	2.49e-19	-1.28848	6.22e-05	-1.67476	1.41e-06	0.115545	0.747671	Fe_Ubi_weak
AGAP002172	3	2	5	0	0	0	7	10	8	13	16	10	0.625012	0.510151	6.34546	1.89e-06	-0.84273	0.202216	4.87771	0.000416963	unbiased
AGAP002173	128	118	101	718	344	397	162	222	255	82	179	74	0.1961	0.477232	-1.18596	4.83e-09	0.771838	0.000342825	-0.610218	0.00284502	Fe_RT_weak
AGAP002174	22	24	19	242	146	156	11	13	35	84	139	154	-0.853988	0.093074	0.476345	0.197015	-2.95858	3.91e-14	-1.62825	2.29e-05	unbiased
AGAP002175	96	126	76	509	280	320	106	129	174	221	311	238	-0.20536	0.43513	0.466369	0.0103249	-1.15089	9e-10	-0.479159	0.0135225	unbiased
AGAP002176	375	453	438	14	9	22	765	1042	1455	117	149	76	0.644828	0.0378271	3.82523	1.27e-28	3.0017	2.71e-28	6.1821	3.48e-76	unbiased
AGAP002177	20	22	20	179	100	123	15	15	11	22	36	45	-1.22145	0.0149069	-0.944208	0.0117692	-1.52934	0.000483058	-1.2521	0.00123663	unbiased
AGAP002178	13	25	22	2	2	1	26	107	101	7	11	4	1.17857	0.0386744	2.83538	0.000404011	3.08609	2.86e-08	4.7429	2.19e-10	Ma_Car_weak
AGAP002181	72	79	40	605	77	193	115	191	197	4559	7048	2460	0.724004	0.217816	5.04075	3.66e-29	-4.92099	1.77e-27	-0.604248	0.226522	Ma_RT_strong
AGAP002182	1394	1664	1487	3067	2131	2735	1182	1620	2111	1040	1771	1163	-0.590707	0.00206175	-0.0671196	0.737406	0.0811048	0.704951	0.604692	0.000480624	unbiased
AGAP002183	147	180	127	444	272	276	164	201	303	171	288	142	-0.124608	0.620532	0.210756	0.262775	-0.049325	0.831534	0.286039	0.123942	unbiased
AGAP002184	44	79	67	13	22	24	124	188	258	38	67	46	0.868063	0.0264098	2.2026	1.12e-08	1.66411	2.09e-06	2.99865	1.98e-15	unbiased
AGAP002185	163	204	126	690	396	441	95	162	222	166	277	212	-0.736382	0.000540783	-0.245358	0.206116	-0.710246	0.000316313	-0.219222	0.264239	unbiased
AGAP002186	602	1289	864	1060	556	704	1037	1925	2008	388	775	319	0.161969	0.630059	0.266756	0.31336	1.5566	1.63e-10	1.66139	3.94e-12	unbiased
AGAP002188	0	0	0	0	0	1	1	0	0	0	0	2	1.07266	NA	1.15254	0.600316	-0.664026	0.78873	-0.584142	0.787203	not_expressed
AGAP002189	0	8	3	15	7	9	6	11	18	6	16	12	0.959011	0.267335	1.06723	0.0868093	-0.19453	0.796364	-0.0863078	0.91161	unbiased
AGAP002190	0	0	0	6	0	0	0	0	2	1	1	1	1.44981	NA	0.237769	0.903945	-0.764334	0.730937	-1.97637	0.320818	not_expressed
AGAP002191	0	0	0	5	1	3	3	1	8	0	2	1	3.76124	NA	-0.580218	0.689199	1.68085	0.227541	-2.6606	0.122179	not_expressed
AGAP002192	1982	2190	1885	623	316	495	5710	6630	7691	720	1382	757	1.05926	3.33e-09	1.9307	8.45e-29	2.64427	9.57e-56	3.51571	1.12e-94	Ma_Car_weak
AGAP002193	143	199	136	1003	516	565	144	228	307	124	282	129	-0.188732	0.44722	-1.03284	8.35e-09	0.155218	0.478336	-0.688893	0.000148615	Fe_RT_weak
AGAP002194	251	237	162	668	355	424	289	541	629	148	324	167	0.457843	0.0300292	-0.248962	0.203546	0.981712	1.22e-07	0.274907	0.152203	unbiased
AGAP002195	27	61	47	10	0	13	127	161	176	55	106	40	1.11608	0.0128278	3.97934	1.42e-16	1.0588	0.00971003	3.92206	6.77e-16	Ma_Car_weak
AGAP002196	14	25	14	1	0	4	10	14	26	2	12	0	-0.756255	0.374293	2.05132	0.0297419	1.70753	0.0314372	4.5151	7.81e-08	unbiased
AGAP002197	1	6	1	0	0	0	2	1	5	0	0	0	-0.537562	NA	0.53279	0.811129	3.73368	0.0416491	4.80403	0.00437053	not_expressed
AGAP002198	291	895	536	10	7	83	136	231	285	29	41	9	-2.00599	0.0177265	0.457474	0.597103	2.73454	0.000466304	5.198	2.18e-12	Fe_Car_weak
AGAP002199	21	24	19	1	0	6	11	19	32	6	16	11	-0.760296	0.186555	3.00566	1.51e-05	0.665252	0.238295	4.4312	2.06e-11	unbiased
AGAP002200	30	46	39	15	2	7	66	104	118	48	162	37	0.621868	0.218522	4.15382	7.3e-18	0.147388	0.769652	3.67934	7.51e-14	unbiased
AGAP002202	2	2	1	0	0	0	6	10	9	1	2	0	1.6382	0.151134	2.99535	0.0692998	2.76792	0.0117499	4.12506	0.00807788	not_expressed
AGAP002203	21	24	32	0	0	0	24	50	63	2	5	1	0.0697907	0.917274	3.90062	0.00410091	3.8022	7.28e-09	7.63302	1.05e-09	unbiased
AGAP002204	6	15	15	1	0	0	35	53	59	8	12	4	1.33183	0.00929892	4.56171	1.79e-05	2.39872	1.25e-06	5.6286	6.21e-08	Ma_Car_weak
AGAP002205	8	23	18	1	2	3	62	75	54	8	5	6	1.33644	0.0225954	2.47702	0.00160909	3.05694	1.02e-07	4.19752	8.02e-09	Ma_Car_weak
AGAP002206	1	6	2	0	0	0	11	18	15	1	1	1	1.65407	0.0727326	2.96405	0.0644255	3.50732	0.000482882	4.8173	0.00100965	unbiased
AGAP002207	0	0	0	0	2	0	2	0	0	0	1	0	1.61227	NA	-0.382353	0.86456	0.834195	0.731728	-1.16043	0.589818	not_expressed
AGAP002208	0	0	0	0	0	0	0	0	0	0	0	0	NA	NA	NA	NA	NA	NA	NA	NA	not_expressed
AGAP002209	0	1	0	0	0	0	0	0	0	0	0	0	-1.49414	NA	0.282971	NA	-0.0698007	NA	1.70731	NA	not_expressed
AGAP002210	0	0	0	0	0	0	0	0	0	0	1	0	-0.205389	NA	1.42375	NA	-1.20522	NA	0.423919	NA	not_expressed
AGAP002211	0	0	0	0	0	0	0	0	0	0	1	1	-0.205389	NA	2.08272	NA	-1.89373	NA	0.39438	NA	not_expressed
AGAP002212	2	11	1	6	4	7	1	6	18	67	294	38	0.117156	0.929596	5.0326	1.24e-10	-3.96621	4.49e-07	0.949242	0.306985	Ma_RT_specific
AGAP002214	53	93	41	634	403	458	102	109	94	218	329	323	0.128735	0.791289	0.21322	0.518923	-1.70561	3.46e-08	-1.62113	1.89e-07	unbiased
AGAP002215	422	421	323	760	537	656	495	832	1198	619	1230	500	0.386405	0.132104	1.13385	6.45e-08	-0.0972369	0.708757	0.65021	0.00251816	unbiased
AGAP002216	18	27	14	90	69	74	31	31	46	367	516	503	0.22035	0.662479	3.53721	2.07e-37	-3.92036	4.29e-40	-0.603493	0.089234	Ma_RT_strong
AGAP002217	108	111	105	12	12	14	215	280	328	25	73	49	0.655536	0.0300525	2.81558	3.58e-15	2.30139	8.73e-17	4.46144	6.3e-39	unbiased
AGAP002218	149	129	68	216	139	144	182	171	152	45	96	78	-0.029733	0.955323	-0.234938	0.549918	1.06132	0.00382958	0.856117	0.0152757	unbiased
AGAP002219	84	149	83	1230	668	662	185	315	254	219	391	174	0.608871	0.0237678	-0.766538	0.000582318	-0.224659	0.387097	-1.60007	1.77e-12	unbiased
AGAP002220	14	15	5	188	70	61	11	5	6	13	10	22	-1.12522	0.16432	-1.62133	0.00657897	-1.23232	0.0794928	-1.72843	0.00448933	Fe_RT_weak
AGAP002221	141	91	64	357	241	287	35	27	47	42	96	49	-2.07945	6.85e-09	-1.34291	3.62e-05	-0.91442	0.0135144	-0.177887	0.61685	Fe_Ubi_weak
AGAP002222	93	81	64	565	284	354	95	153	160	117	214	146	0.0900897	0.76541	-0.361661	0.0555218	-0.441145	0.030921	-0.892896	3.72e-06	unbiased
AGAP002223	103	141	115	528	393	492	79	138	223	151	252	136	-0.440703	0.146189	-0.482668	0.0512486	-0.543348	0.0391784	-0.585313	0.0178458	unbiased
AGAP002224	159	133	130	71	20	68	287	395	474	144	497	162	0.744473	0.0833846	3.16563	1.31e-17	0.442385	0.276386	2.86354	1.79e-14	unbiased
AGAP002226	6	25	15	0	0	0	30	99	103	10	19	10	1.58939	0.00576073	5.99584	1.55e-06	2.2766	1.91e-05	6.68305	6.63e-08	unbiased
AGAP002227	93	180	89	279	147	178	80	102	127	98	153	129	-0.863644	0.00138282	0.326985	0.193709	-0.533596	0.041113	0.657033	0.00631969	unbiased
AGAP002228	21	32	19	0	0	1	65	66	105	37	69	24	1.05535	0.00675211	6.82589	1.45e-12	0.700864	0.0454736	6.47141	2.47e-11	Ma_Car_weak
AGAP002229	20	27	23	1	0	0	35	73	115	4	17	6	0.914882	0.0613313	4.62786	9.75e-06	2.81011	4.62e-09	6.52308	1.06e-10	unbiased
AGAP002231	0	0	0	0	1	0	0	0	0	0	0	0	-0.205389	NA	-1.00239	NA	-0.0698007	NA	-0.866802	NA	not_expressed
[truncated: 11,625 more rows]

## Sheet: An. arabiensis
geneID	Female_Car1	Female_Car2	Female_Car3	Female_RT1	Female_RT2	Female_RT3	Male_Car1	Male_Car2	Male_Car3	Male_RT1	Male_RT2	Male_RT3	log2FC_Carc	padj_Carc	log2FC_RT	padj_RT	log2FC_M	padj_M	log2FC_F	padj_F	final.class.corr
AARA000001	0	0	2	1	0	0	0	0	0	2	6	2	-3.01026	NA	3.26585	0.0486843	-5.01341	0.0052736	1.2627	0.498944	not_expressed
AARA000002	4	5	1	0	0	0	16	6	8	1	0	0	0.31609	NA	1.56651	0.431956	3.53697	0.0122867	4.78739	0.00375791	unbiased
AARA000003	1285	1122	1023	19	63	16	1240	3022	1358	39	46	76	-0.654301	0.303217	1.25398	0.0111766	4.0082	4.46e-19	5.91649	1.09e-38	unbiased
AARA000004	0	0	3	0	0	0	7	3	3	0	0	0	0.861915	NA	0.238938	0.920826	3.86574	0.0451019	3.24277	0.0994474	not_expressed
AARA000005	186	177	175	298	461	526	677	744	303	484	237	352	0.275335	0.324328	0.191748	0.351227	-0.348552	0.0754199	-0.43214	0.0293914	unbiased
AARA000006	10	18	16	28	52	43	32	56	25	76	25	160	-0.0255432	0.982423	1.49063	0.00387141	-2.1546	2.44e-05	-0.638432	0.267886	Ma_RT_weak
AARA000007	119	88	95	62	75	87	302	414	203	170	142	215	0.238803	0.512841	1.70624	7e-13	-0.238476	0.327019	1.22897	5.53e-07	unbiased
AARA000008	1	0	0	7	14	15	0	3	3	25	13	24	0.766972	0.735515	1.23763	0.0245695	-4.22907	7.34e-09	-3.75842	0.00156459	Ma_RT_weak
AARA000009	158	166	163	436	647	678	411	346	162	392	428	251	-0.468002	0.321347	-0.166782	0.646174	-1.3309	4.09e-05	-1.02968	0.0016495	unbiased
AARA000010	881	872	942	571	775	776	3454	3100	1239	3948	2193	3602	0.121548	0.727812	2.63838	4.64e-43	-1.3693	1.31e-12	1.14753	5.23e-09	Ma_RT_strong
AARA000011	108	119	125	184	248	245	260	234	130	184	170	133	-0.526437	0.123054	0.0305243	0.919173	-0.695152	0.00793306	-0.138191	0.631007	unbiased
AARA000012	0	3	0	0	0	0	13	17	9	2	0	1	2.2274	NA	2.77636	0.125469	2.61177	0.0292587	3.16073	0.0743769	unbiased
AARA000013	10	8	10	1	0	1	44	58	23	5	1	4	0.762115	0.242314	2.40936	0.0230585	2.57055	1.66e-05	4.2178	1.16e-05	unbiased
AARA000014	0	0	0	0	0	0	0	0	0	0	0	0	NA	NA	NA	NA	NA	NA	NA	NA	not_expressed
AARA000015	0	0	0	0	0	0	0	0	0	0	0	0	NA	NA	NA	NA	NA	NA	NA	NA	not_expressed
AARA000016	0	0	0	0	0	0	0	0	0	0	0	0	NA	NA	NA	NA	NA	NA	NA	NA	not_expressed
AARA000017	2	2	10	0	1	2	5	14	5	6	1	3	-0.570865	NA	1.94936	0.0939172	0.246608	0.81423	2.76683	0.0119422	unbiased
AARA000018	0	2	1	0	1	0	1	6	0	2	0	2	-0.360875	NA	1.85739	0.296349	-0.340004	0.845707	1.87826	0.289053	not_expressed
AARA000019	0	0	0	0	0	0	0	0	0	0	1	0	-0.4152	NA	1.71483	NA	-1.86428	NA	0.265748	NA	not_expressed
AARA000020	30	31	29	8	23	15	24	43	11	2	0	3	-1.64125	0.000266934	-2.57841	0.000496528	2.72975	0.000168559	1.79259	2.38e-05	Fe_Car_weak
AARA000021	3	3	3	0	0	0	2	4	6	0	0	2	-0.688752	NA	2.3441	0.215354	1.60448	0.250369	4.63733	0.00594783	not_expressed
AARA000022	17	18	14	0	0	0	42	78	35	1	0	2	0.282132	0.717118	2.54183	0.118097	4.49042	1.96e-07	6.75012	1.28e-06	unbiased
AARA000023	135	103	136	182	309	330	580	916	504	96	85	120	1.08567	7.89e-05	-0.936463	0.000288024	1.71089	7.13e-12	-0.311252	0.243609	Ma_Car_weak
AARA000024	103	102	99	276	445	440	379	488	241	485	390	481	0.495567	0.0287731	0.72179	1.78e-05	-1.33518	7.46e-16	-1.10896	1.03e-09	unbiased
AARA000025	280	235	280	366	498	469	729	982	378	213	111	251	-0.0130916	0.974129	-0.771052	8.23e-05	0.813675	2.73e-05	0.0557142	0.800618	unbiased
AARA000026	5	2	3	0	0	0	3	10	5	1	0	0	-0.462669	NA	1.61323	0.422888	2.77931	0.0532814	4.85521	0.00345154	unbiased
AARA000027	25	16	15	0	0	0	44	86	35	0	0	1	0.16677	0.844876	1.44906	0.432516	5.7132	7.02e-07	6.99549	7.5e-07	unbiased
AARA000028	4	3	3	1	0	0	6	7	6	22	11	22	-0.391248	0.762271	5.50091	1.28e-06	-2.46505	2.28e-05	3.42711	0.00477722	Ma_RT_specific
AARA000029	1511	1412	1512	1658	2566	2540	3650	3358	1442	4163	6275	4484	-0.465436	0.314772	1.71348	8.06e-08	-1.97055	5.99e-10	0.208364	0.554178	Ma_RT_weak
AARA000030	65	64	65	378	576	460	166	321	115	340	95	244	0.210753	0.695896	-0.663909	0.0282537	-1.16793	9.45e-05	-2.0426	1.17e-11	unbiased
AARA000031	119	124	131	95	164	112	318	295	137	132	71	95	-0.377824	0.210162	0.144357	0.572745	0.304552	0.200492	0.826734	0.000258696	unbiased
AARA000032	406	359	415	646	952	983	1344	1547	678	811	459	884	0.20944	0.399409	0.193811	0.273631	-0.300772	0.0786885	-0.3164	0.0661428	unbiased
AARA000033	17	7	8	31	45	45	59	77	32	222	156	165	0.984631	0.0238903	2.6368	2.84e-25	-2.74645	3.28e-29	-1.09428	0.00287864	Ma_RT_strong
AARA000034	258	208	227	130	231	246	415	417	171	186	209	180	-0.865348	0.00700986	0.47012	0.10623	-0.318087	0.281283	1.01738	0.00022711	unbiased
AARA000035	163	142	118	2	4	2	710	453	198	1	5	3	0.273759	0.694928	0.650651	0.443301	5.99822	6.18e-24	6.37511	4.94e-25	unbiased
AARA000036	33	34	23	0	0	0	152	96	47	0	0	0	0.320557	0.693227	0.334274	0.886368	7.62633	1.33e-07	7.64004	5.61e-08	unbiased
AARA000037	133	149	121	151	182	153	158	204	83	23	6	19	-1.25903	7.43e-07	-2.89885	2.74e-21	2.16625	2.93e-12	0.526427	0.0292293	Fe_Car_weak
AARA000038	62	48	69	122	179	159	219	286	97	53	21	39	0.330836	0.300344	-1.5761	4.2e-11	1.35054	1.53e-08	-0.556399	0.0150038	Fe_RT_weak
AARA000039	5	6	10	13	20	20	19	34	15	9	1	6	0.311893	0.734181	-1.27171	0.0259952	1.06133	0.0619124	-0.522276	0.348647	unbiased
AARA000040	26	111	126	12	15	1	228	221	123	58	142	4	-0.203641	0.924132	3.20093	0.00529151	0.232451	0.860145	3.63702	0.00130188	unbiased
AARA000041	34	22	33	3	8	3	104	233	113	74	14	36	0.980347	0.103158	3.43921	4.53e-09	0.934936	0.0486553	3.3938	8.21e-09	unbiased
AARA000042	346	395	650	581	1060	634	836	501	292	293	266	43	-1.09158	0.161592	-1.33354	0.0268561	0.335893	0.609714	0.0939262	0.885639	unbiased
AARA000043	43	137	188	10	24	1	140	199	98	14	98	0	-0.978417	0.66529	2.16343	0.126429	0.541747	0.721745	3.68359	0.00668043	unbiased
AARA000044	77	64	73	175	268	289	234	243	86	176	120	187	-0.021856	0.965069	-0.122035	0.611813	-0.854607	9.32e-05	-0.954786	2.52e-05	unbiased
AARA000045	21	19	33	64	83	73	98	111	36	72	43	54	0.330146	0.470029	0.0718635	0.824921	-0.536472	0.0510982	-0.794754	0.00809644	unbiased
AARA000046	2858	2775	3082	3337	4517	4778	6215	5102	2242	5994	10751	4995	-0.750582	0.167916	1.37753	0.000783669	-1.86049	4.38e-06	0.267622	0.545338	Ma_RT_weak
AARA000047	2635	2380	2891	6257	9034	8818	5160	4008	1768	5106	6211	5242	-0.92051	0.00830325	0.00511348	0.987504	-1.72316	4.12e-09	-0.797537	0.00767198	unbiased
AARA000048	35	33	42	7	12	6	258	172	76	141	166	93	0.800323	0.168888	4.47906	8.59e-20	-0.79246	0.0668614	2.88627	1.56e-08	unbiased
AARA000049	1121	862	965	799	1136	1174	3203	3872	1557	1188	966	1183	0.145987	0.583842	0.594121	0.000361696	0.284478	0.0965392	0.732613	8.22e-06	unbiased
AARA000050	0	0	0	0	0	0	0	0	0	0	0	0	NA	NA	NA	NA	NA	NA	NA	NA	not_expressed
AARA000051	525	505	550	2064	2960	2752	1032	860	343	917	451	756	-0.907002	0.000247705	-1.43075	4.4e-11	-0.962883	1.47e-05	-1.48663	6.93e-12	Fe_RT_weak
AARA000052	111	98	110	198	318	282	367	524	190	125	34	136	0.339749	0.47581	-1.02082	0.0011827	0.857622	0.00662062	-0.502948	0.116562	unbiased
AARA000053	142	108	146	208	298	310	567	465	175	235	270	210	0.193468	0.733655	0.347696	0.308217	-0.39025	0.24675	-0.236021	0.495529	unbiased
AARA000054	45	30	39	182	287	276	131	247	90	53	16	52	0.621325	0.115449	-2.18067	9.04e-14	0.91769	0.00269217	-1.88431	1.27e-10	Fe_RT_weak
AARA000055	1767	1776	1437	600	857	725	2599	3349	1386	650	396	829	-0.846639	0.000427661	0.231334	0.328421	0.922205	2.17e-05	2.00018	2.65e-21	unbiased
AARA000056	221	130	148	17	21	9	205	338	144	12	20	88	-0.907723	0.274091	1.75463	0.00641179	1.42786	0.0201556	4.09021	1.86e-11	unbiased
AARA000057	155	157	220	262	420	382	355	428	216	223	131	131	-0.445465	0.0840848	-0.661637	0.0012048	0.0264394	0.914453	-0.189733	0.375842	unbiased
AARA000058	130	142	190	329	485	496	487	651	309	436	359	413	0.280948	0.288035	0.378532	0.0396763	-0.792805	8e-06	-0.695221	0.000186112	unbiased
AARA000059	116	112	154	369	537	544	303	208	91	159	201	129	-0.728866	0.127055	-1.00399	0.00600125	-0.836565	0.0244665	-1.11169	0.00215552	Fe_RT_weak
AARA000060	119	102	114	53	61	76	685	625	223	105	203	132	0.760162	0.15467	1.77416	1.56e-05	0.584372	0.165063	1.59837	0.000104301	unbiased
AARA000061	505	473	503	478	672	696	1151	1230	546	1673	2317	1388	-0.403655	0.396374	2.10281	2.05e-11	-2.01671	1.32e-10	0.489748	0.141541	Ma_RT_weak
AARA000062	7	23	22	3	4	0	22	25	8	10	9	12	-1.32084	0.0616146	2.50473	0.00103584	-0.268072	0.685414	3.5575	1.07e-06	not_expressed
AARA000063	379	386	321	126	177	191	916	917	439	224	224	228	-0.318025	0.350923	0.963038	8.24e-05	0.667695	0.00541426	1.94876	1.22e-16	unbiased
AARA000064	39	33	30	3	18	11	169	235	89	86	41	59	0.857517	0.0121775	2.98068	3.16e-16	0.360869	0.210299	2.48404	4.94e-11	unbiased
AARA000065	27	36	34	27	36	28	127	112	45	59	96	55	0.139918	0.859289	1.75232	4.13e-05	-0.72838	0.086713	0.884018	0.0504281	unbiased
AARA000066	82	60	90	307	551	455	175	413	203	120	57	155	0.423805	0.403258	-1.52108	4.87e-06	0.273672	0.45798	-1.67121	5.63e-07	Fe_RT_weak
AARA000067	112	73	106	493	761	742	294	553	270	187	98	207	0.586509	0.0814632	-1.56232	5.74e-10	0.188751	0.508042	-1.96008	1.65e-14	Fe_RT_weak
AARA000068	92	180	234	12	30	9	419	584	267	39	8	18	-0.0382685	0.967784	0.746428	0.172244	3.29238	1.91e-12	4.07708	6.79e-18	unbiased
AARA000069	212	196	193	58	95	64	785	1370	529	392	195	441	0.746938	0.00753313	2.67502	3.94e-27	0.347972	0.160974	2.27606	1.21e-19	unbiased
AARA000070	33	22	31	123	186	170	79	81	32	91	60	80	-0.235419	0.583846	-0.580617	0.00792693	-1.318	9.49e-09	-1.6632	1.09e-11	unbiased
AARA000071	0	0	0	0	0	0	0	0	0	0	0	0	NA	NA	NA	NA	NA	NA	NA	NA	not_expressed
AARA000072	444	496	500	615	845	903	1517	1425	592	1539	1338	1353	-0.108775	0.78567	1.33992	3.87e-10	-1.35301	2.41e-10	0.0956883	0.697483	Ma_RT_weak
AARA000073	1	1	3	0	0	0	10	11	2	3	6	4	0.73571	NA	4.79086	0.00252794	-0.35405	0.716639	3.7011	0.0245486	unbiased
AARA000074	3	3	5	0	0	0	27	23	8	10	6	4	0.986162	0.323692	5.16058	0.000457123	0.46786	0.502073	4.64228	0.00181338	unbiased
AARA000075	13	8	14	24	35	50	19	33	18	15	4	17	-0.346584	0.661789	-1.14559	0.0142653	-0.0200695	0.972419	-0.819077	0.0812108	unbiased
AARA000076	193	164	142	38	85	62	259	481	193	34	11	38	-0.499867	0.220416	-0.692906	0.0550258	2.4557	6.55e-14	2.26266	1.28e-13	unbiased
AARA000077	864	769	907	498	668	654	2540	2996	1210	604	181	417	0.00800207	0.9872	-0.209804	0.434918	1.49501	6.66e-10	1.27721	1.2e-07	unbiased
AARA000078	145	104	111	53	87	80	638	928	360	88	102	96	1.0074	0.00030917	0.903058	0.00100465	1.62756	8.55e-11	1.52321	8.67e-09	Ma_Car_weak
AARA000079	638	564	719	1122	1711	1288	1553	2683	1069	1095	380	1197	0.0697833	0.89994	-0.219612	0.482999	-0.00670258	0.985009	-0.296098	0.331681	unbiased
AARA000080	47	45	37	33	33	29	66	155	68	25	21	25	-0.221658	0.711074	0.0359396	0.933786	0.963327	0.00896377	1.22093	0.000772349	unbiased
AARA000081	101	76	105	111	175	171	187	164	73	87	44	80	-0.792026	0.0044829	-0.656265	0.00871212	-0.0210724	0.944594	0.114689	0.667136	unbiased
AARA000082	925	577	657	32	60	17	6	7	6	8	17	5	-7.98905	1.3e-43	-1.25132	0.0335707	-1.68815	0.00983253	5.04958	2.28e-24	Fe_Car_specific
AARA000083	379	357	366	13	40	9	967	1076	494	103	90	151	-0.178401	0.76865	2.9597	8.31e-15	1.81196	8.07e-08	4.95007	1.03e-40	unbiased
AARA000084	35	34	37	298	429	425	97	127	53	180	165	153	-0.00903979	0.986332	-0.704855	0.000692201	-1.92786	6.18e-19	-2.62367	1.08e-28	unbiased
AARA000085	274	250	315	87	183	68	834	1057	417	1690	1190	1339	0.0578534	0.913762	4.12014	3.02e-51	-1.93936	4.78e-13	2.12293	3.77e-14	Ma_RT_strong
AARA000086	3	3	6	9	19	9	29	41	19	0	0	1	1.50528	0.0467028	-4.03998	0.00047485	4.74615	2.85e-05	-0.799113	0.231265	Ma_Car_weak
AARA000087	8	8	6	10	19	19	29	35	18	1	0	4	0.524175	0.502229	-2.66456	0.000386284	2.89254	8.31e-05	-0.296194	0.604733	unbiased
AARA000088	3	0	0	39	62	38	1	1	0	0	0	0	-1.74511	0.344542	-7.45162	1.44e-06	1.06116	0.580033	-4.64534	7.83e-07	Fe_RT_specific
AARA000089	1	0	2	20	53	47	2	0	0	0	1	0	-1.7	0.362573	-5.84051	1.75e-06	-0.22359	0.898512	-4.36411	5.89e-06	Fe_RT_specific
AARA000090	174	156	195	392	581	518	470	591	279	453	243	348	-0.0213551	0.938289	-0.0611923	0.678979	-0.658284	4.73e-07	-0.698121	3.15e-07	unbiased
AARA000091	14	14	11	41	80	98	32	23	5	33	40	27	-0.817198	0.260913	-0.560385	0.24561	-1.87887	0.000110437	-1.62205	0.000921157	unbiased
AARA000092	57	48	66	80	114	102	200	137	66	146	121	112	-0.13929	0.808427	0.846811	0.00562742	-0.976619	0.00115897	0.00948184	0.978618	unbiased
AARA000093	280	274	322	997	1479	1363	281	199	108	261	192	209	-1.93096	1.09e-15	-2.04465	1.85e-19	-1.20535	4.26e-07	-1.31903	5.79e-09	Fe_RT_weak
AARA000094	0	0	1	0	1	0	2	0	0	0	0	1	-0.200305	NA	0.329077	NA	-0.0214634	NA	0.507918	NA	not_expressed
AARA000095	97	89	113	22	31	18	433	383	147	48	47	77	0.276669	0.583413	1.74497	1.25e-06	1.38012	1.57e-05	2.84842	1.71e-16	unbiased
AARA000096	102	78	69	1	1	0	69	86	41	0	0	0	-1.71796	4.47e-07	-1.23548	0.472376	6.8988	5.24e-07	7.38128	2.11e-16	Fe_Car_weak
AARA000097	470	325	400	13	24	14	1616	1599	804	35	30	137	0.381654	0.623299	2.40565	3.54e-06	3.25534	5.59e-12	5.27934	2.41e-26	unbiased
AARA000098	5	10	11	14	18	14	19	39	22	3	1	3	0.278434	0.767188	-2.18582	0.0020102	2.43653	0.000411694	-0.0277199	0.963366	not_expressed
AARA000099	929	763	693	155	218	238	2188	4640	1852	189	52	195	0.456898	0.362671	-0.0902417	0.835268	3.30979	2.12e-22	2.76265	3.39e-16	unbiased
AARA000100	64	62	64	326	502	433	235	350	139	81	43	77	0.527759	0.0193451	-2.18628	2.49e-35	0.799653	1.71e-05	-1.91438	3.95e-27	Fe_RT_weak
AARA000101	1311	1018	1121	753	1092	1060	4045	5973	2497	453	428	661	0.464247	0.09163	-0.413856	0.0672819	1.93443	4.59e-20	1.05632	7.06e-07	unbiased
AARA000102	0	0	0	0	0	0	0	1	0	0	1	0	0.514721	NA	1.59747	NA	-0.823311	NA	0.259442	NA	not_expressed
AARA000103	81	76	75	114	151	243	273	290	105	209	217	180	0.101331	0.865775	0.783414	0.0143694	-0.990331	0.00165799	-0.308248	0.369293	unbiased
AARA000104	262	212	286	816	1190	1157	845	1318	612	592	438	573	0.500978	0.00783542	-0.498039	0.00148869	-0.250756	0.124035	-1.24977	1.18e-15	unbiased
AARA000105	80	82	95	5	9	4	287	480	181	89	53	103	0.474213	0.119731	4.16434	6.05e-25	0.891191	0.000153897	4.58132	3.48e-30	unbiased
AARA000106	0	0	0	0	0	0	0	0	0	0	5	0	-0.271388	NA	3.25555	0.128254	-3.35981	0.117589	0.167125	0.940884	not_expressed
AARA000107	2	10	7	0	0	0	6	7	5	0	2	0	-1.34205	NA	2.3579	0.196901	1.91782	0.127975	5.61777	0.000403071	not_expressed
AARA000108	4	6	12	0	2	0	33	31	19	4	2	6	0.589643	0.529917	2.69118	0.0130424	1.77249	0.00778159	3.87403	0.000151509	unbiased
AARA000109	14	23	23	2	10	2	89	73	26	23	29	23	0.224836	0.801961	2.9076	1.24e-06	0.183674	0.735194	2.86644	2.02e-06	unbiased
AARA000110	273	212	226	135	219	197	718	841	370	256	168	199	0.0514666	0.864953	0.652932	0.000169719	0.582157	0.000424523	1.18362	1.67e-12	unbiased
AARA000111	401	330	388	796	1077	1167	1072	809	391	1178	1132	1008	-0.356599	0.374507	0.640343	0.0205507	-1.63079	9.6e-10	-0.633848	0.0217284	unbiased
AARA000112	0	2	0	89	171	148	7	4	2	40	23	32	0.98892	0.526824	-1.61848	1.82e-07	-3.84076	1.22e-14	-6.44816	4.12e-13	Fe_RT_weak
AARA000113	792	804	850	770	1099	837	1659	3643	1237	666	244	438	-0.0134629	0.979912	-0.599733	0.0236344	1.24106	1.21e-06	0.654785	0.011513	unbiased
AARA000114	0	0	2	0	0	1	0	0	0	0	0	0	-2.25296	NA	-0.987793	NA	-0.237968	NA	1.0272	NA	not_expressed
AARA000115	31	21	28	0	0	0	156	163	69	8	5	5	0.888045	0.0261923	4.71518	0.000485547	3.35996	2.94e-14	7.1871	2.74e-08	unbiased
AARA000116	0	0	0	0	0	0	0	0	0	0	0	0	NA	NA	NA	NA	NA	NA	NA	NA	not_expressed
AARA000117	9	7	12	0	0	0	30	43	20	6	8	5	0.367297	0.661789	5.01518	0.000409702	1.21654	0.0256787	5.86442	2.46e-05	unbiased
AARA000118	18	10	15	0	0	0	199	118	53	3	2	5	1.70115	0.00388153	3.97038	0.00590999	4.08867	1.5e-10	6.35789	2.89e-06	Ma_Car_specific
AARA000119	3	3	2	0	0	0	12	17	6	1	5	2	0.708021	NA	4.09827	0.0102129	0.945306	0.298673	4.33556	0.00601805	unbiased
AARA000120	0	0	0	0	0	0	0	0	0	0	0	0	NA	NA	NA	NA	NA	NA	NA	NA	not_expressed
AARA000121	97	104	80	15	13	15	1307	516	160	46	50	101	1.33523	0.0542857	2.59306	1.34e-05	2.15554	0.0001134	3.41338	5.11e-09	unbiased
AARA000122	15	3	7	113	129	151	2	7	6	0	1	2	-2.00141	0.00901922	-6.27419	1.78e-13	1.11956	0.264132	-3.15322	2.83e-09	Fe_RT_specific
AARA000123	78	87	87	139	208	222	189	231	99	112	89	91	-0.348916	0.205936	-0.473314	0.0192618	-0.234075	0.27184	-0.358473	0.0815562	unbiased
AARA000124	290	288	315	662	1139	1009	629	760	343	654	293	401	-0.425759	0.0566764	-0.610865	0.000498067	-0.643365	0.000272884	-0.828471	2.05e-06	unbiased
AARA000125	487	481	519	537	785	598	752	1047	444	320	112	237	-0.796576	0.000623898	-1.10937	1.49e-07	0.74807	0.000479031	0.435279	0.0404473	unbiased
AARA000126	95	103	110	12	23	15	429	431	207	151	159	125	0.416053	0.292227	3.62382	1.68e-27	0.204476	0.499387	3.41224	3.34e-24	unbiased
AARA000127	939	869	913	1144	1505	1382	2363	2696	1349	2297	1459	2087	-0.12935	0.499992	0.990066	1.16e-16	-0.885747	1.07e-13	0.233669	0.0664051	unbiased
AARA000128	350	322	322	383	588	466	719	1111	437	595	199	695	-0.216889	0.672225	0.453895	0.15359	-0.390246	0.222878	0.280537	0.385218	unbiased
AARA000129	139	118	136	1050	1576	1527	234	213	106	641	315	481	-0.87733	5.47e-05	-1.08389	5.63e-10	-2.37741	4.76e-39	-2.58397	1.2e-45	Fe_RT_weak
AARA000130	111	91	111	322	450	162	268	556	221	605	217	429	0.340181	0.590325	0.794948	0.0441159	-1.24523	0.00123764	-0.79046	0.0466466	unbiased
AARA000131	7	3	1	8	8	5	5	11	7	6	1	5	-0.269964	0.8544	-0.409013	0.646071	-0.0019044	0.998451	-0.140953	0.874273	unbiased
AARA000132	255	234	258	501	426	356	613	780	307	228	83	156	-0.21901	0.650876	-1.10028	0.000181413	0.84849	0.0041848	-0.0327771	0.919497	unbiased
AARA000133	1761	1650	2233	377	643	315	3192	5158	2153	508	192	270	-0.485764	0.213238	-0.0452282	0.901944	2.42883	6.34e-18	2.86936	7.07e-25	unbiased
AARA000134	81	89	106	124	178	187	242	236	96	272	193	242	-0.339448	0.248073	1.00784	3.71e-07	-1.36391	3.17e-12	-0.01662	0.94483	Ma_RT_weak
AARA000135	3	0	2	57	97	105	2	1	1	81	93	74	-1.56262	0.240304	0.48204	0.224371	-6.77295	2.33e-20	-4.72829	1.72e-11	unbiased
AARA000136	112	93	115	202	328	249	346	479	183	161	65	121	0.249132	0.39961	-0.726922	0.000289549	0.505194	0.0125222	-0.47086	0.0204585	unbiased
AARA000137	3	6	4	1	1	5	35	31	7	7	2	0	0.980531	0.428354	0.73315	0.496596	1.86578	0.0353609	1.6184	0.0979542	unbiased
AARA000138	412	465	440	764	1181	890	992	1894	760	380	76	420	0.0662616	0.933957	-1.30934	0.00152364	1.08707	0.00891756	-0.288529	0.512553	unbiased
AARA000139	1	2	1	3	0	0	6	7	1	0	1	1	0.291713	NA	-0.155929	0.925001	1.38858	0.339597	0.94094	0.524127	not_expressed
AARA000140	0	0	0	0	1	0	0	0	0	8	2	2	-0.691195	NA	3.57877	0.033204	-5.37899	0.00341001	-1.10902	0.61276	not_expressed
AARA000141	0	0	0	1	1	0	0	0	0	78	55	72	-0.900949	0.805549	6.99399	1.65e-12	-9.40812	3.02e-10	-1.51318	0.426648	Ma_RT_specific
AARA000142	298	250	275	1149	1885	1539	938	1050	433	516	200	315	0.156169	0.655905	-1.71745	1.59e-17	0.221757	0.32108	-1.65186	3e-16	Fe_RT_weak
AARA000143	69	61	64	4	15	1	363	456	177	56	22	31	0.946579	0.00994238	2.8443	4.09e-10	2.14942	2.4e-11	4.04714	2.72e-20	unbiased
AARA000144	2	2	0	186	290	286	6	5	1	202	118	153	0.0553895	0.974129	-0.221359	0.326416	-6.26209	9.18e-44	-6.53884	9.61e-22	unbiased
AARA000145	194	172	261	370	530	549	679	682	320	668	480	368	0.053922	0.912135	0.554213	0.0309759	-0.906509	0.000294566	-0.406218	0.121999	unbiased
AARA000146	13	0	3	618	964	852	1	0	0	17	26	17	-4.33103	0.000517488	-4.71125	2.5e-18	-5.94299	2.6e-08	-6.32321	7.12e-25	Fe_RT_strong
AARA000147	55	79	71	1	2	0	67	142	51	2	8	22	-1.06247	0.147909	3.55641	0.000119849	1.86354	0.00214843	6.48242	1.13e-13	unbiased
AARA000148	163	77	123	13	18	5	168	234	124	14	17	111	-0.780242	0.441217	2.33127	0.001157	0.872044	0.224353	3.98355	8.72e-09	unbiased
AARA000149	8	2	1	0	1	1	4	6	0	0	0	0	-1.57349	NA	-1.64295	0.411323	3.03594	0.0951417	2.96647	0.0373486	not_expressed
AARA000150	35	29	31	2	3	1	134	184	69	22	11	19	0.617072	0.0872023	3.41813	8.32e-08	1.83358	4.28e-09	4.63464	4.49e-14	unbiased
AARA000151	653	279	395	34	55	43	8	0	0	0	1	0	-8.53481	5.72e-37	-5.64584	1.88e-07	1.20097	0.345926	4.08994	1.26e-17	Fe_Car_specific
AARA000152	25	25	19	1	1	0	124	173	57	5	5	12	0.919152	0.0471695	3.47287	0.000274877	2.88891	1.15e-10	5.44263	1.48e-09	unbiased
AARA000153	1	0	0	0	0	0	1	1	0	0	0	0	-0.269988	NA	0.181861	NA	1.41126	NA	1.86311	NA	not_expressed
AARA000154	86	70	63	9	11	1	156	166	62	4	12	67	-0.59315	0.644131	2.30213	0.00634452	1.0812	0.190211	3.97648	9.08e-07	unbiased
AARA000155	0	0	0	0	0	0	3	0	0	0	0	0	1.61187	NA	0.158724	NA	1.71889	NA	0.265748	NA	not_expressed
AARA000156	2	0	2	55	107	94	1	0	2	714	304	564	-1.59868	0.258581	3.06216	3.3e-29	-9.63153	3.87e-38	-4.97069	3.84e-12	Ma_RT_strong
AARA000157	1	0	1	49	103	108	1	0	1	350	141	336	-1.23424	0.517381	2.10812	8.23e-10	-9.11887	6.26e-26	-5.77652	2.28e-10	Ma_RT_weak
AARA000158	7	0	4	427	629	639	1	0	0	59	38	66	-3.86505	0.00155961	-2.9046	1.84e-31	-7.3632	5.48e-14	-6.40275	1.48e-40	Fe_RT_strong
AARA000159	8	0	2	376	518	579	0	0	2	375	177	275	-3.14742	0.00418556	-0.394823	0.136443	-9.0652	2.02e-28	-6.3126	3.97e-36	unbiased
AARA000160	3	0	2	131	216	283	0	0	2	325	216	229	-2.2616	0.0928259	0.780488	0.0102502	-9.0286	6.12e-27	-5.98651	2.36e-19	unbiased
AARA000161	42	30	33	4	9	2	144	43	9	4	4	14	-0.547186	0.667913	0.984922	0.289794	1.94709	0.0170369	3.4792	2.16e-05	unbiased
AARA000162	131	110	136	720	1082	775	347	528	221	248	67	195	0.149607	0.778745	-1.93976	5.67e-12	0.128034	0.696103	-1.96133	3.88e-12	Fe_RT_weak
AARA000163	181	188	188	384	541	448	429	855	303	338	137	239	0.0860506	0.84041	-0.52389	0.0248438	0.115552	0.651822	-0.494389	0.0339487	unbiased
AARA000164	7	5	5	130	185	159	18	7	6	76	84	59	-0.484389	0.603396	-0.583041	0.144869	-3.83871	1.17e-17	-3.93736	2.35e-15	unbiased
AARA000165	398	401	476	851	1335	1256	188	95	48	198	114	134	-3.30436	4.17e-24	-2.46674	6.1e-15	-1.45244	1.26e-05	-0.614821	0.0588298	Fe_Ubi_strong
AARA000166	120	93	103	473	661	708	299	233	108	232	179	190	-0.366706	0.320684	-1.12362	4.04e-06	-0.970232	0.000110437	-1.72715	2.36e-12	Fe_RT_weak
AARA000167	11	2	7	256	415	419	16	11	10	92	62	46	-0.44216	0.605502	-1.94357	1.27e-08	-3.39554	1.58e-16	-4.89695	1.8e-27	Fe_RT_weak
AARA000168	100	93	115	386	482	535	299	470	205	247	78	208	0.279049	0.501955	-0.99698	0.00013046	-0.109518	0.712503	-1.38555	1.15e-07	unbiased
AARA000169	1	0	1	5	4	5	1	2	8	1913	2266	1416	0.954052	0.575508	8.99485	1.43e-46	-9.68358	6.16e-52	-1.64278	0.130995	Ma_RT_specific
AARA000170	38	34	36	167	276	262	123	91	45	78	84	52	-0.115984	0.862469	-1.17146	0.000525855	-0.815526	0.0207549	-1.87101	6.03e-08	Fe_RT_weak
AARA000171	81	75	93	0	0	0	509	802	328	5	4	15	1.32377	1.35e-06	4.9123	0.000108742	5.01328	7.08e-41	8.60182	1.25e-12	Ma_Car_weak
AARA000172	98	65	85	120	171	175	243	267	133	173	157	172	0.00906115	0.985069	0.60534	0.00703026	-0.698987	0.001487	-0.102708	0.691021	unbiased
AARA000173	62	93	101	174	291	255	187	187	90	182	92	161	-0.515349	0.0912149	-0.270113	0.263017	-0.916098	7.01e-05	-0.670862	0.00422815	unbiased
AARA000174	0	5	2	0	0	0	0	0	0	0	0	0	-4.8366	NA	0.213994	0.927821	-0.433179	0.860175	4.61741	0.0231785	not_expressed
AARA000175	92	49	86	7	11	4	17	14	4	4	5	8	-4.05565	5.21e-18	0.109744	0.885693	-0.0541241	0.938993	4.11127	2.78e-17	Fe_Car_specific
AARA000176	51	45	45	235	424	348	102	140	53	44	14	33	-0.341211	0.344401	-3.00422	6.88e-34	0.658776	0.0157927	-2.00424	2.48e-18	Fe_RT_strong
AARA000177	131	128	114	162	246	154	312	643	211	120	21	77	0.198769	0.777783	-0.996507	0.0132964	1.41226	0.000329893	0.216981	0.610988	unbiased
AARA000178	0	1	2	0	0	1	11	14	5	47	55	46	1.78714	0.141032	7.00349	2.91e-10	-3.39355	1.31e-11	1.8228	0.190152	Ma_RT_specific
AARA000179	3	3	6	39	22	33	23	20	33	32	24	20	1.46558	0.0968897	0.105586	0.88372	-0.812889	0.180829	-2.17288	0.00149565	unbiased
AARA000180	16	4	14	550	747	783	14	11	8	550	396	381	-1.3814	0.00705576	-0.165966	0.548171	-6.31726	6.06e-75	-5.10182	4.87e-50	unbiased
AARA000181	14	11	12	42	96	82	29	54	26	18	23	16	0.18206	0.817751	-1.39014	0.00034711	-0.142087	0.75694	-1.71429	2.91e-05	Fe_RT_weak
AARA000182	26	13	19	95	165	169	44	78	25	45	30	39	-0.0798352	0.900199	-1.42214	3.07e-07	-0.711623	0.0204558	-2.05392	1.78e-11	Fe_RT_weak
AARA000183	19	8	13	51	85	65	8	43	15	24	11	19	-0.685003	0.361615	-1.42906	0.00296028	-0.754494	0.151882	-1.49855	0.00218641	Fe_RT_weak
AARA000184	16	19	24	72	106	113	49	110	22	17	6	22	0.123402	0.869904	-2.22886	4.14e-08	0.871586	0.0435852	-1.48067	0.000167176	Fe_RT_weak
AARA000185	27	21	25	100	181	161	58	148	53	24	6	32	0.406311	0.520401	-2.37298	2.7e-09	1.02249	0.0145739	-1.7568	7.31e-06	Fe_RT_strong
AARA000186	1	6	1	14	20	15	8	22	4	3	1	4	0.547539	0.684421	-2.10075	0.0075732	0.91287	0.280369	-1.73542	0.0263109	Fe_RT_weak
AARA000187	31	21	33	3	3	6	97	129	68	247	157	245	0.432482	0.258109	6.13038	5.66e-42	-2.15347	1.7e-22	3.54443	1.46e-13	Ma_RT_specific
AARA000188	0	2	1	1	0	0	11	9	7	1	3	2	1.76278	NA	2.51158	0.0787225	1.10201	0.289768	1.85081	0.2242	not_expressed
AARA000189	25	2	17	1304	2033	2002	4	1	4	521	331	410	-3.39963	7.85e-07	-1.58889	0.000133543	-7.86199	1.47e-40	-6.05125	1.08e-40	Fe_RT_weak
AARA000190	1708	1453	1598	1351	2085	1698	2423	3081	1353	677	140	636	-0.852871	0.0594171	-1.43834	7.16e-05	1.28297	0.000417392	0.697497	0.0586182	unbiased
AARA000191	139	144	190	178	260	206	407	539	232	1365	928	1204	-0.0682696	0.811028	2.90863	2.22e-97	-2.62057	2.74e-85	0.356335	0.0271414	Ma_RT_strong
AARA000192	192	191	197	185	299	234	498	570	186	416	198	282	-0.323057	0.271912	0.762058	0.000279195	-0.578001	0.00564723	0.507114	0.0181362	unbiased
AARA000193	185	166	199	1043	1777	1746	697	778	358	674	601	515	0.357864	0.238802	-0.821748	9.78e-05	-1.04403	7.63e-07	-2.22364	4.65e-26	unbiased
AARA000194	883	850	965	131	168	95	1877	3232	1353	527	125	844	-0.126918	0.886355	2.25257	1.27e-06	1.13138	0.0167246	3.51087	1.39e-14	unbiased
AARA000195	4	0	0	204	318	286	3	3	2	60	33	43	-0.45193	0.775462	-2.1055	2.96e-17	-5.00088	7.37e-20	-6.65445	9.78e-22	Fe_RT_weak
AARA000196	18865	18798	20767	13002	17682	16782	38773	38981	16682	27045	13836	22891	-0.702123	3.26e-05	0.860184	2.02e-08	-0.461211	0.00329788	1.1011	3.88e-13	unbiased
AARA000197	23	25	42	7	11	12	48	36	12	29	40	14	-1.29551	0.0482128	1.99881	0.000491594	-0.954145	0.0816949	2.34017	3.44e-05	Fe_Car_weak
AARA000198	144	145	179	352	507	486	419	545	251	235	191	222	0.000701249	0.998278	-0.567048	0.000248998	-0.148251	0.378546	-0.715999	4.93e-06	unbiased
AARA000199	503	586	611	1317	1784	1691	705	651	282	1240	1108	758	-1.44318	9.74e-07	-0.113191	0.719723	-2.01809	8.65e-14	-0.688102	0.0133713	unbiased
AARA000200	416	425	488	180	244	273	1040	1539	671	533	526	403	-0.0922284	0.83564	1.58616	2.5e-11	0.0531892	0.84909	1.73158	2.47e-13	unbiased
AARA000201	295	375	546	29	12	11	308	386	202	96	116	44	-1.75287	0.00251637	2.69755	6.26e-07	0.690297	0.204552	5.14072	1.04e-22	Fe_Car_weak
AARA000202	964	925	1125	1851	2716	2802	1854	1628	708	1971	3345	1845	-0.909633	0.0510286	0.555719	0.157087	-1.94133	1.52e-07	-0.475975	0.223469	unbiased
AARA000203	0	0	0	904	2010	935	0	0	1	5	1	6	-0.0774325	0.982423	-7.78644	1.53e-44	-3.76804	0.00116477	-11.477	2.1e-16	Fe_RT_strong
AARA000204	0	0	4	1	2	1	7	15	6	27608	35049	35412	1.2098	0.290428	14.74	8.45e-94	-12.7802	8.91e-180	0.749994	0.479841	Ma_RT_specific
AARA000205	4	3	4	10	23	22	15	23	10	1	1	1	0.727235	0.444737	-3.48907	7.03e-05	2.74835	0.00200611	-1.46796	0.0196432	Fe_RT_specific
AARA000206	6	7	6	23	27	35	45	52	24	5	3	7	1.27301	0.0249026	-2.01303	6.86e-05	1.9448	9.76e-05	-1.34124	0.00499073	Fe_RT_specific
AARA000207	35	13	23	193	273	199	58	112	40	44	8	28	0.149672	0.850737	-2.65147	7.1e-11	0.389648	0.397509	-2.4115	3.37e-09	Fe_RT_strong
AARA000208	148	138	143	277	278	196	445	765	351	134	44	148	0.487429	0.326192	-0.837363	0.0194961	1.2804	0.000243138	-0.0443911	0.909014	unbiased
AARA000209	23	14	17	17	36	23	34	92	39	19	6	20	0.224206	0.782278	-0.30267	0.561417	0.857805	0.0685456	0.330929	0.505351	unbiased
AARA000210	26	36	41	34	60	34	64	132	57	29	5	28	-0.0834872	0.916881	-0.630591	0.175843	1.04213	0.0181044	0.495023	0.265468	unbiased
AARA000211	0	2	1	2	2	1	1	3	0	0	1	1	-0.984955	NA	-0.711053	0.655582	-0.240427	0.889389	0.0334757	0.982499	not_expressed
AARA000212	1	0	3	1	1	1	4	7	1	73	25	61	0.113958	0.951075	5.89057	1.04e-11	-4.68992	1.69e-14	1.08669	0.353265	Ma_RT_specific
AARA000213	134	128	164	6	17	2	278	323	162	711	397	462	-0.51763	0.082766	6.37878	1.39e-72	-2.0463	1.13e-20	4.85011	2.8e-41	Ma_RT_specific
AARA000214	57	49	54	17	48	59	216	375	156	186	69	176	0.825873	0.0538881	2.23874	1.11e-10	-0.203003	0.581803	1.20986	0.000904717	unbiased
AARA000215	3	1	0	0	0	0	4	2	3	0	4	0	-0.0327838	NA	3.29925	0.0813313	0.0308368	0.986516	3.36287	0.0730848	not_expressed
AARA000216	0	1	0	0	0	0	0	0	0	0	1	0	-1.6807	NA	1.53891	NA	-1.63764	NA	1.58198	NA	not_expressed
AARA000217	0	0	0	0	0	0	1	1	3	0	0	0	2.97103	NA	0.212032	NA	3.114	NA	0.355	NA	not_expressed
AARA000218	0	0	0	0	0	1	0	0	0	0	0	0	-0.423893	NA	-1.14282	NA	-0.316869	NA	-1.03579	NA	not_expressed
AARA000219	23	21	25	109	189	156	107	107	38	39	19	39	0.454704	0.288035	-1.75668	1.47e-10	0.321308	0.296337	-1.89007	5.22e-11	Fe_RT_weak
AARA000220	76	79	93	2	15	11	119	164	69	438	521	224	-0.874948	0.126054	5.92568	9.58e-34	-2.86692	1.03e-11	3.93371	3.34e-15	Ma_RT_specific
AARA000221	78	103	101	133	265	194	248	450	204	206	61	185	0.299537	0.569301	0.0326829	0.92968	0.0339733	0.930868	-0.23288	0.51172	unbiased
AARA000222	41	0	1	785	801	292	0	0	1	2	3	0	-4.37483	0.0289415	-6.69947	2.92e-05	-1.79048	0.318335	-4.11512	0.00958807	Fe_RT_specific
AARA000223	46	40	48	29	47	56	122	218	78	62	32	67	0.225762	0.610321	0.742883	0.0110301	0.317399	0.263525	0.83452	0.00428484	unbiased
AARA000224	0	0	0	0	0	0	0	0	0	0	0	0	NA	NA	NA	NA	NA	NA	NA	NA	not_expressed
AARA000225	17	21	21	73	88	65	35	83	32	31	23	25	-0.0596212	0.93351	-1.05485	0.00227806	-0.145874	0.714128	-1.14111	0.00132404	Fe_RT_weak
AARA000226	2	4	5	1	0	1	14	9	3	25	16	5	-0.157826	0.920757	4.54813	1.99e-05	-1.85165	0.0135161	2.85431	0.0121351	not_expressed
AARA000227	0	0	0	1	0	0	0	1	0	2	1	0	0.583959	NA	1.3866	NA	-2.00339	NA	-1.20075	NA	not_expressed
AARA000228	0	0	1	0	0	0	0	0	1	0	4	0	-0.436795	NA	3.04163	0.158237	-1.90259	0.382949	1.57583	0.478568	not_expressed
AARA000229	446	483	524	880	1421	1069	1514	1933	811	3262	1763	3013	0.156503	0.490833	1.70412	4.44e-35	-1.9467	9.17e-46	-0.399084	0.00700501	Ma_RT_weak
AARA000230	2006	1920	1974	607	560	418	5687	6535	2213	722	867	1386	-0.145826	0.819565	1.35696	9.78e-05	1.12862	0.00121082	2.6314	7.69e-15	unbiased
AARA000231	48	57	63	28	39	43	257	287	126	986	934	1329	0.605513	0.0676372	5.36506	2.59e-95	-3.34825	6.19e-49	1.41129	1.05e-06	Ma_RT_strong
AARA000232	27	23	43	0	0	2	113	131	62	4	4	3	0.357352	0.505958	2.52523	0.0128775	3.70917	2.04e-12	5.87705	5e-11	unbiased
AARA000233	363	200	350	264	145	220	1218	2089	849	28	23	72	0.793977	0.182971	-1.94488	2.48e-05	3.97351	7.15e-19	1.23465	0.00583589	unbiased
AARA000234	4	40	97	2	3	0	4	16	2	1	2	1	-3.99363	0.000132988	0.189484	0.901181	1.03758	0.3943	5.22069	5.27e-07	Fe_Car_specific
AARA000235	90	79	72	49	73	37	209	302	111	88	78	193	-0.0540312	0.941598	1.62819	1.96e-05	-0.28968	0.474399	1.39254	0.000295667	unbiased
AARA000236	4	0	1	5	12	13	26	35	10	4446	3411	10455	2.18218	0.0166734	9.61233	1.34e-83	-8.99551	1.26e-85	-1.56537	0.0511004	Ma_RT_specific
AARA000237	351	278	347	43	49	12	1031	1689	604	236	220	253	0.346348	0.569283	3.1974	5.76e-16	1.10007	0.00410626	3.95112	5.02e-24	unbiased
AARA000238	1	0	0	0	1	2	7	12	1	12198	21694	16488	2.01053	0.193974	14.1283	2.36e-64	-12.362	9.94e-106	-0.244227	0.866462	Ma_RT_specific
AARA000239	0	0	1	0	1	0	11	13	3	19133	34938	36186	2.46717	0.0848559	15.8991	1.6e-54	-12.7319	1.62e-131	0.700055	0.654258	Ma_RT_specific
AARA000240	1	2	6	0	2	1	35	45	4	58831	85450	119358	1.57482	0.0903581	16.2845	4.9e-85	-12.6727	2.9e-122	2.03697	0.0404771	Ma_RT_specific
AARA000241	7	8	14	5	4	16	16	17	10	40114	42120	77293	-0.771544	0.314772	12.9805	1.75e-164	-12.7625	2.21e-183	0.989489	0.0890067	Ma_RT_strong
AARA000242	80	54	164	37	77	150	243	306	130	975762	365512	1311426	-0.169975	0.852332	13.5657	2.19e-187	-12.7546	2.49e-169	0.981061	0.0519426	Ma_RT_strong
AARA000243	3	0	3	0	1	2	12	18	6	21940	26534	48115	1.04746	0.322396	14.9721	2.22e-80	-12.3692	9.99e-159	1.55546	0.126523	Ma_RT_specific
AARA000244	3	1	4	1	2	8	22	24	5	39411	46548	71198	1.11368	0.234583	14.0975	1.92e-135	-12.6106	3.02e-174	0.373266	0.662198	Ma_RT_specific
AARA000245	1	0	2	1	1	4	18	19	9	26308	48105	33045	2.21888	0.0397346	14.3772	1.46e-98	-12.1964	6.5e-140	-0.0380547	0.973412	Ma_RT_specific
AARA000246	2	4	8	4	5	5	75	76	18	134597	108521	296502	2.04039	0.00265727	15.4348	4.95e-172	-12.625	2.16e-184	0.769362	0.290578	Ma_RT_specific
AARA000247	2	1	6	0	2	8	17	23	10	31816	52762	48968	1.00427	0.307049	14.0212	1.65e-115	-12.3642	1.93e-141	0.652692	0.439888	Ma_RT_specific
AARA000248	0	0	0	0	0	0	0	0	0	560	1022	2530	-0.932989	0.791118	12.9291	8.13e-18	-13.327	6.9e-20	0.535069	0.809276	Ma_RT_specific
AARA000249	2	0	3	0	0	2	6	3	0	5412	9254	10163	-0.586757	0.712929	13.5047	1.16e-48	-12.342	2.38e-78	1.74949	0.130607	Ma_RT_specific
AARA000250	1	4	0	8	8	3	3	6	2	0	2	2	-0.298842	NA	-1.63313	0.149115	0.263525	0.840558	-1.07077	0.33702	unbiased
AARA000251	28	16	28	89	148	94	40	78	22	35	6	29	-0.477368	0.45844	-1.82442	8.52e-06	-0.0376056	0.942384	-1.38465	0.000682252	Fe_RT_weak
AARA000252	169	187	228	724	1106	762	395	568	246	272	67	169	-0.33087	0.47931	-1.96207	4.17e-11	0.29036	0.379213	-1.34084	6.71e-06	Fe_RT_weak
AARA000253	5	5	6	21	42	28	16	17	3	13	16	8	-0.276861	0.803445	-0.752891	0.14819	-1.17767	0.0321888	-1.6537	0.00364785	unbiased
AARA000254	5	5	10	36	59	46	14	20	7	30	14	20	-0.362429	0.659733	-0.682468	0.0614181	-1.66893	3.77e-05	-1.98897	6.37e-06	unbiased
AARA000255	12	5	8	51	44	54	25	25	9	21	17	30	-0.165202	0.85507	-0.686322	0.0975923	-1.26312	0.00348369	-1.78424	9.73e-05	unbiased
AARA000256	91	85	103	210	351	319	174	180	116	343	234	223	-0.571954	0.0510286	0.351371	0.123803	-1.75964	8.03e-16	-0.836316	0.000258933	unbiased
AARA000257	141	131	155	458	661	617	330	405	190	410	316	265	-0.257985	0.401262	-0.316038	0.123468	-1.15591	4.28e-09	-1.21397	1.19e-09	unbiased
AARA000258	463	433	457	1161	1827	1757	1250	1559	658	975	814	866	-0.0374103	0.901738	-0.331282	0.0362716	-0.695794	5.98e-06	-0.989666	1e-10	unbiased
AARA000259	266	259	285	452	735	506	701	1104	398	568	236	373	0.0237231	0.954755	-0.095755	0.678883	-0.130831	0.564424	-0.250309	0.247944	unbiased
AARA000260	51	44	66	3	5	2	149	119	54	39	64	28	-0.374245	0.621964	4.15765	2.71e-11	0.134872	0.802318	4.66677	4.33e-14	unbiased
AARA000261	176	175	186	378	618	472	354	711	296	850	458	488	-0.0489893	0.915378	0.747425	0.00131541	-1.4286	3.56e-10	-0.632182	0.00809078	unbiased
AARA000262	3	4	5	138	274	317	12	7	9	252	99	176	-0.119891	0.917395	-0.0169677	0.964427	-5.10185	3.31e-34	-4.99893	3.51e-22	unbiased
AARA000263	21	22	20	76	86	100	71	70	33	85	72	52	0.0810482	0.903947	0.156933	0.641322	-1.32622	1.61e-05	-1.25033	0.000208083	unbiased
AARA000264	406	415	446	1337	1904	2019	313	180	96	372	515	237	-2.45335	3.04e-08	-1.62714	0.000104196	-2.05534	1e-06	-1.22914	0.00344504	Fe_RT_weak
AARA000265	113	108	121	204	302	222	376	404	165	205	64	194	0.0651518	0.907481	-0.251238	0.420745	0.0322472	0.926008	-0.284143	0.354538	unbiased
AARA000266	703	701	883	692	1067	697	2942	2889	1233	1903	1685	1688	0.234539	0.512897	1.60238	9.67e-13	-0.671651	0.00355251	0.696186	0.00258029	Ma_RT_weak
AARA000267	502	486	507	310	425	324	1968	2470	1040	581	199	429	0.476135	0.101016	0.584947	0.0127296	1.18479	1.25e-07	1.2936	8.78e-09	unbiased
AARA000268	66	62	74	1	2	0	251	390	132	27	18	14	0.510387	0.123226	4.39871	1.55e-08	2.61548	8.36e-19	6.50381	4.37e-18	unbiased
AARA000269	49	31	36	0	2	0	105	176	71	34	22	27	0.205144	0.691522	5.32161	1.12e-09	1.02641	0.00114418	6.14287	1.06e-12	unbiased
AARA000270	16	15	19	0	0	0	52	72	30	31	10	26	0.235831	0.726313	6.5642	5.4e-07	0.188402	0.650593	6.51677	6.15e-07	unbiased
AARA000271	160	116	134	50	61	57	2188	4627	2186	87	116	96	3.07978	5.11e-21	1.3504	0.000117453	3.79532	1.97e-32	2.06594	1.34e-09	Ma_Car_strong
AARA000272	128	129	148	214	290	228	585	824	364	146	42	102	0.746327	0.0103238	-0.937117	0.000260476	1.62652	5.63e-11	-0.0569241	0.840545	unbiased
AARA000273	0	0	0	0	0	0	0	0	0	0	0	0	NA	NA	NA	NA	NA	NA	NA	NA	not_expressed
AARA000274	0	0	0	0	0	0	0	0	1	0	0	0	1.07999	NA	0.158724	NA	1.18701	NA	0.265748	NA	not_expressed
AARA000275	68	90	71	122	165	143	204	213	90	159	69	172	-0.255548	0.565291	0.317274	0.271968	-0.671859	0.0144261	-0.0990368	0.752401	unbiased
AARA000276	2370	2171	2567	2661	3771	3864	5374	3584	1650	4906	9633	3806	-0.803619	0.198727	1.44272	0.00187593	-1.9769	1.58e-05	0.269439	0.593383	Ma_RT_weak
AARA000277	488	458	522	725	1066	1031	868	839	370	454	255	380	-0.886902	1.15e-07	-0.915867	5.91e-09	-0.103345	0.564069	-0.132309	0.433871	unbiased
AARA000278	21	22	16	66	103	93	58	66	30	42	42	38	-0.00618883	0.993015	-0.599032	0.0376951	-0.732018	0.0138918	-1.32486	1.92e-05	unbiased
AARA000279	278	251	259	77	115	87	1030	1250	477	218	35	177	0.387852	0.533813	0.969977	0.019371	1.70289	1.61e-05	2.28501	6.75e-09	unbiased
AARA000280	165	109	136	6	10	5	454	743	307	487	335	448	0.482608	0.0716391	6.3253	5.91e-68	-0.812379	5.9e-05	5.03031	2.54e-42	Ma_RT_specific
AARA000281	0	0	2	0	0	1	31	44	21	0	1	2	4.04452	0.00104583	1.6087	0.288448	3.82034	9.84e-05	1.38452	0.380299	Ma_Car_specific
AARA000282	114	81	77	5	10	6	257	525	196	327	338	274	0.427671	0.379775	5.93427	2.05e-42	-1.06496	0.00099275	4.44164	1.08e-23	Ma_RT_strong
AARA000283	104	55	68	1	1	0	277	387	169	9	1	7	0.4905	0.289108	3.02433	0.00161802	4.55598	1e-22	7.08982	2.63e-16	unbiased
AARA000284	21	15	9	0	1	0	47	92	29	76	78	48	0.448475	0.563291	7.2212	4.71e-12	-1.40915	0.00156762	5.36358	4.75e-07	Ma_RT_specific
AARA000285	5269	5620	6460	1640	1707	1119	34966	29207	12127	331	381	324	0.728753	0.0900196	-1.60748	1.78e-06	5.03487	6.54e-54	2.69865	1.59e-16	unbiased
AARA000286	302	276	322	1048	1687	1354	362	621	278	340	84	341	-0.881869	0.0346663	-2.01448	1.65e-09	-0.228298	0.546777	-1.36091	5.03e-05	Fe_RT_weak
AARA000287	37	35	46	18	24	27	49	41	23	48	58	23	-1.39874	0.00596204	1.4327	0.00151354	-1.27406	0.00373524	1.55738	0.000520731	Ma_RT_weak
AARA000288	65	45	54	22	31	31	82	82	37	47	27	29	-1.08543	0.00039283	0.7496	0.020394	-0.0713057	0.834533	1.76372	2.49e-09	Fe_Car_weak
AARA000289	55	65	69	397	582	514	221	202	101	96	60	98	0.0984726	0.811224	-2.08824	5.73e-25	0.0187572	0.943445	-2.16796	2.46e-25	Fe_RT_weak
AARA000290	4	2	0	0	0	0	1	13	4	0	0	0	0.147847	NA	0.254819	0.916971	4.05831	0.029476	4.16528	0.0242032	not_expressed
AARA000291	6	3	10	1	0	0	20	28	16	0	0	1	0.439046	0.703313	0.366467	0.84737	4.45108	0.000293148	4.3785	0.000351417	unbiased
AARA000292	104	87	165	242	356	362	345	304	146	404	354	308	-0.201456	0.676207	0.659921	0.0191128	-1.49329	4.73e-08	-0.631912	0.027797	unbiased
AARA000293	16	8	8	16	17	10	12	30	14	6	5	9	-0.561071	0.507644	-0.645066	0.305902	0.432859	0.497609	0.348864	0.561448	unbiased
AARA000294	477	413	463	621	919	501	1358	1806	772	437	297	274	0.150059	0.728404	-0.548331	0.0311771	0.901813	0.000264409	0.203422	0.440917	unbiased
AARA000295	10	14	10	2	3	2	84	82	29	63	45	41	1.09087	0.0308725	4.75288	7.26e-15	-0.693298	0.0534107	2.96871	5.86e-06	Ma_Ubi_weak
AARA000296	63	60	67	173	283	245	201	221	102	323	191	261	0.0815609	0.813947	0.611279	9.85e-05	-1.59519	2.05e-24	-1.06547	3.24e-09	unbiased
AARA000297	30	19	26	263	400	315	120	168	55	1255	237	880	0.749659	0.200195	1.62031	3.03e-05	-3.73758	2.72e-22	-2.86693	4.59e-12	Ma_RT_weak
AARA000298	0	1	0	1	0	0	2	4	3	6	3	2	1.52813	NA	3.30987	0.0201144	-1.17193	0.294922	0.609808	0.745971	not_expressed
AARA000299	2	0	0	0	0	0	5	4	2	5	0	1	0.984525	NA	3.60557	0.0497167	0.0145531	0.993074	2.63559	0.169777	not_expressed
AARA000300	0	0	0	0	0	1	0	1	2	1798	1693	1155	1.04665	0.707494	11.954	9.43e-28	-11.3601	1.07e-43	-0.452761	0.816659	Ma_RT_specific
AARA000301	299	322	315	553	792	699	1044	1238	512	1276	354	1185	0.174385	0.751028	0.841367	0.00620722	-0.982039	0.00125611	-0.315057	0.331317	unbiased
AARA000302	243	237	249	919	1466	1196	549	1035	344	647	245	502	-0.0324307	0.944041	-0.937815	3.28e-05	-0.570109	0.0141182	-1.47549	4.86e-11	unbiased
AARA000303	209	196	211	249	325	303	659	710	312	741	600	475	0.0584274	0.894114	1.53771	4.11e-12	-1.18979	7.63e-08	0.289489	0.232912	Ma_RT_weak
AARA000304	12	2	4	0	0	0	37	36	14	20	9	18	0.864463	0.332514	6.19032	8.85e-06	-0.140657	0.829365	5.1852	0.000243972	unbiased
AARA000305	349	318	354	357	473	374	664	1670	589	203	48	230	0.0945581	0.901239	-0.945002	0.0212822	1.59126	6.64e-05	0.551695	0.18186	unbiased
AARA000306	2	4	7	2	0	0	9	20	11	13	11	17	0.277865	0.824629	4.4069	9.94e-06	-1.04041	0.0883041	3.08863	0.00341078	unbiased
AARA000307	492	490	440	1380	1933	1853	1580	2713	1114	109	44	156	0.523726	0.175507	-3.62115	4.09e-36	3.10191	8.37e-27	-1.04297	0.000275988	Fe_RT_strong
AARA000308	230	198	243	617	830	825	853	1253	608	60	45	71	0.653795	0.00044427	-3.21647	2.38e-66	2.91306	7.62e-55	-0.957206	5.81e-09	Fe_RT_strong
AARA000309	0	0	0	0	0	0	0	1	0	0	0	0	0.641537	NA	0.158724	NA	0.748561	NA	0.265748	NA	not_expressed
AARA000310	1	0	1	0	0	0	5	5	3	0	0	0	1.37151	NA	0.249277	0.918334	4.0458	0.0307957	2.92356	0.138831	not_expressed
AARA000311	22	27	19	64	107	98	90	76	54	30	17	28	0.36043	0.479409	-1.36575	2.32e-05	0.575396	0.0904284	-1.15078	0.00042057	Fe_RT_weak
AARA000312	41	33	54	198	346	286	111	92	43	78	53	55	-0.429849	0.278371	-1.66556	5.05e-11	-0.639674	0.0212365	-1.87539	8.22e-13	Fe_RT_weak
AARA000313	553	515	566	150	261	223	1663	2127	914	426	200	325	0.13539	0.542271	1.03477	8.95e-12	1.28387	5.15e-20	2.18325	4.99e-51	unbiased
AARA000314	6	4	6	123	156	191	33	16	6	11	12	16	0.365627	0.712069	-3.072	4.71e-12	-0.580138	0.271419	-4.01776	8.66e-15	Fe_RT_strong
AARA000315	522	559	575	779	1351	1147	1282	1786	711	1279	567	903	-0.214113	0.37958	0.190545	0.277354	-0.563483	0.000619438	-0.158826	0.366485	unbiased
AARA000316	18	13	10	6	8	1	200	98	37	34	26	14	1.56695	0.0385678	2.68479	0.000108742	1.04811	0.0912807	2.16595	0.00228917	Ma_Ubi_weak
AARA000317	17	13	8	1	0	5	452	254	125	1	3	0	3.00566	1.53e-06	-0.0191623	0.986343	6.33946	1.54e-14	3.31464	3.31e-05	Ma_Car_strong
AARA000318	41	31	36	270	419	168	109	189	92	19	5	36	0.487235	0.50845	-3.38471	1.37e-12	1.70582	0.000543054	-2.16612	2.88e-06	Fe_RT_specific
AARA000319	25	47	32	2	4	6	201	152	109	23	34	38	0.820878	0.15467	3.42599	5.67e-09	1.23799	0.00505292	3.8431	4.16e-11	unbiased
AARA000320	199	197	223	534	814	818	615	632	294	682	1002	599	-0.0626503	0.922393	0.656488	0.054434	-1.70441	1.96e-07	-0.985276	0.0032731	unbiased
AARA000321	0	0	0	0	0	0	0	0	0	0	0	0	NA	NA	NA	NA	NA	NA	NA	NA	not_expressed
AARA000322	13	13	13	0	1	0	79	93	33	53	15	35	0.972311	0.0666097	6.19191	2.94e-09	-0.0232224	0.959338	5.19637	9.17e-07	unbiased
AARA000323	17	0	4	1149	1525	1477	0	0	0	8	0	6	-5.13499	0.00311541	-7.26265	2.09e-09	-4.18875	0.00673513	-6.31642	1.25e-07	Fe_RT_specific
AARA000324	6	3	6	0	0	0	26	36	15	0	0	0	0.990532	0.275481	0.306282	0.901239	6.09212	0.000117405	5.40787	0.000555366	unbiased
AARA000325	27	12	19	0	1	1	98	115	55	0	1	5	0.839311	0.152189	1.73404	0.127569	4.33604	2.86e-10	5.23077	2.63e-08	unbiased
AARA000326	104	73	99	2	4	2	346	492	235	12	22	27	0.594773	0.15274	3.31077	3.49e-08	3.04357	1.47e-18	5.75956	3.12e-24	unbiased
AARA000327	264	266	377	213	376	323	751	1047	450	349	120	290	-0.0697349	0.878195	0.15973	0.555867	0.575961	0.0201044	0.805426	0.00095807	unbiased
AARA000328	240	205	214	440	767	576	808	954	519	2543	1531	1423	0.442202	0.131996	2.09735	3.39e-23	-2.26577	4.89e-27	-0.610619	0.00687777	Ma_RT_weak
AARA000329	169	132	156	129	171	106	534	717	308	100	37	83	0.381543	0.269571	-0.472637	0.0875056	1.81183	7.74e-13	0.95765	0.00015157	unbiased
AARA000330	237	193	237	462	787	471	539	1050	405	259	58	201	0.176223	0.785567	-1.34035	0.000176489	0.965511	0.00764558	-0.551061	0.133463	unbiased
AARA000331	78	57	78	306	524	473	306	408	159	351	332	238	0.63008	0.0676554	0.0338834	0.912699	-1.18984	3.33e-06	-1.78604	1.57e-11	unbiased
AARA000332	151	154	150	113	159	177	199	270	124	208	151	160	-0.998727	3.2e-07	0.687989	0.000226	-0.855812	2.61e-06	0.830904	7.41e-06	unbiased
AARA000333	84	65	75	352	520	490	215	354	145	947	499	541	0.275821	0.414054	0.994433	5.45e-07	-2.50697	9.64e-37	-1.78836	1.16e-16	unbiased
AARA000334	11	9	9	0	0	0	41	50	22	1	3	1	0.581437	0.435526	3.25114	0.0369156	3.35601	7.03e-06	6.02571	2.16e-05	unbiased
AARA000335	1	0	1	0	0	0	5	3	0	19	15	3	0.4613	NA	6.2371	0.000112155	-3.21254	0.00230824	2.56326	0.160779	not_expressed
AARA000336	109	104	102	341	498	439	204	352	158	160	62	158	-0.200045	0.627271	-1.32172	4.4e-08	-0.0834532	0.769137	-1.20513	6.98e-07	Fe_RT_weak
AARA000337	55	74	70	72	80	67	234	249	113	116	45	111	0.195145	0.685987	0.711099	0.0156922	0.131198	0.674319	0.647152	0.0293925	unbiased
AARA000338	7	6	1	0	0	0	50	47	18	2	3	2	1.59617	0.063955	3.72074	0.0165292	2.87798	0.000215924	5.00254	0.000738017	unbiased
AARA000339	1	0	0	36	43	54	0	0	1	2	0	1	-1.11934	0.671886	-4.92367	8.04e-08	-2.03398	0.158492	-5.83832	1.61e-06	Fe_RT_specific
AARA000340	16	5	9	0	0	0	50	37	23	0	2	1	0.541881	0.587417	2.63179	0.11292	3.97663	2.16e-05	6.06654	2.93e-05	unbiased
AARA000341	16	7	4	9	21	11	19	15	8	1	2	0	-0.720139	0.469103	-3.00834	0.00151011	2.52205	0.00821963	0.233856	0.750017	unbiased
AARA000342	0	0	0	0	0	0	0	0	0	1	1	0	-0.417258	NA	2.30034	NA	-2.43607	NA	0.281527	NA	not_expressed
AARA000343	0	0	0	0	0	0	0	0	1	5	1	1	0.985652	NA	4.21901	0.0341341	-2.85926	0.117743	0.374102	0.872459	not_expressed
AARA000344	5	2	4	2	1	3	10	19	5	6	4	0	0.181792	NA	1.11549	0.274924	0.62396	0.491169	1.55766	0.110807	unbiased
AARA000345	0	0	0	0	0	0	0	0	0	0	0	0	NA	NA	NA	NA	NA	NA	NA	NA	not_expressed
AARA000346	20	13	24	1	2	4	67	116	43	8	12	7	0.584313	0.314187	2.3525	0.000712305	1.93579	1.84e-05	3.70397	1.17e-08	unbiased
AARA000347	184	173	174	121	154	152	466	632	280	179	196	186	-0.0100975	0.982586	0.901897	0.000110272	0.201363	0.411297	1.11336	1.37e-06	unbiased
AARA000348	0	0	0	0	0	0	1	0	0	1	0	1	0.769855	NA	2.32288	NA	-1.23828	NA	0.314751	NA	not_expressed
AARA000349	8	7	6	1	2	0	22	28	15	16	10	27	0.266388	0.788758	4.32088	5.21e-07	-0.705781	0.167001	3.34871	0.000190397	unbiased
AARA000350	23	25	20	0	0	5	44	91	45	8	3	18	0.0439297	0.970195	2.79548	0.000831939	1.62331	0.00641848	4.37486	3.14e-08	unbiased
AARA000351	0	0	0	0	0	0	0	0	0	0	0	0	NA	NA	NA	NA	NA	NA	NA	NA	not_expressed
AARA000352	331	281	331	959	1429	1366	663	843	393	790	494	700	-0.366199	0.00623993	-0.452817	1.86e-05	-1.09503	6e-25	-1.18164	1.01e-27	unbiased
AARA000353	0	0	0	0	0	0	0	0	0	0	0	0	NA	NA	NA	NA	NA	NA	NA	NA	not_expressed
AARA000354	50	48	48	217	326	291	111	172	56	46	11	90	-0.22188	0.789848	-2.0757	3.56e-06	0.173274	0.738878	-1.68054	0.000173174	Fe_RT_weak
AARA000355	2	3	6	4	2	0	6	19	5	4	0	5	0.0056857	NA	0.829589	0.463985	0.654238	0.528979	1.47814	0.162538	not_expressed
AARA000356	265	211	281	991	1575	1381	692	925	405	311	149	343	0.0366322	0.922921	-1.84814	1.65e-22	0.31706	0.122743	-1.56771	1.35e-16	Fe_RT_weak
AARA000357	2	8	10	5	3	1	4	3	6	5	3	10	-1.73178	0.122272	1.31541	0.166076	-1.25229	0.169691	1.7949	0.0491698	unbiased
AARA000358	54	71	67	152	268	269	243	303	134	311	302	264	0.433704	0.232083	0.879912	0.0003282	-1.4546	1.62e-09	-1.00839	0.000109673	unbiased
AARA000359	216	173	224	752	1092	1006	445	507	188	310	155	277	-0.513391	0.0141057	-1.495	1.7e-19	-0.42821	0.0159764	-1.40982	2.89e-17	Fe_RT_weak
AARA000360	17	14	15	9	10	11	31	113	30	11	3	10	0.443844	0.573252	0.0957785	0.896971	1.73767	0.00123102	1.38961	0.0115213	unbiased
AARA000361	41	46	61	16	28	24	100	271	95	24	7	40	0.23715	0.758753	0.486684	0.346794	1.66213	0.000216452	1.91166	2.67e-05	unbiased
AARA000362	11	8	5	1	3	2	10	37	12	3	2	3	-0.136049	0.912003	0.837708	0.403273	1.73509	0.0247874	2.70885	0.00106788	unbiased
AARA000363	12	18	14	1	0	0	12	77	27	4	0	0	-0.023277	0.987978	1.72471	0.231229	3.65304	0.000196151	5.40103	7.35e-06	unbiased
AARA000364	49	35	57	229	395	326	147	128	46	51	38	48	-0.218577	0.645054	-2.29523	1.52e-17	0.145843	0.650556	-1.93081	6.35e-13	Fe_RT_weak
AARA000365	132	127	149	273	415	412	97	69	37	121	100	69	-2.35881	3.51e-14	-1.40974	1.36e-06	-1.56398	3.78e-07	-0.614906	0.037569	Fe_RT_weak
AARA000366	88	126	176	355	489	513	253	318	145	95	145	95	-0.489095	0.338309	-1.44234	3.92e-05	-0.0411741	0.923884	-0.994418	0.00474368	Fe_RT_weak
AARA000367	80	70	73	113	142	105	81	223	116	34	15	35	-0.422922	0.444252	-1.66467	1.69e-05	1.34061	0.00057731	0.0988554	0.812378	unbiased
AARA000368	48	28	32	6	7	5	113	204	83	14	1	7	0.491307	0.381732	0.673404	0.28053	3.14805	1.99e-11	3.33015	1.99e-11	unbiased
AARA000369	153	122	141	136	221	150	252	253	142	77	103	69	-0.704487	0.0762488	-0.472638	0.160047	0.291161	0.399453	0.523011	0.106046	unbiased
AARA000370	20	23	32	247	243	397	78	42	18	32	14	33	-0.506091	0.453262	-3.04012	2.78e-13	-0.21975	0.659418	-2.75378	3.69e-11	Fe_RT_strong
AARA000371	28	26	36	4	1	0	121	65	43	2	4	0	0.0148015	0.989344	0.664609	0.522439	4.06158	5.2e-08	4.71139	1.19e-09	unbiased
AARA000372	126	172	167	160	219	174	263	628	214	126	35	120	-0.182406	0.77462	-0.584578	0.117125	0.95056	0.0082079	0.548388	0.131451	unbiased
AARA000373	195	298	329	317	501	436	669	1100	425	295	59	219	0.0108643	0.988896	-0.750538	0.0505025	0.964677	0.0104457	0.203275	0.616951	unbiased
AARA000374	3	5	3	0	0	0	12	9	3	0	0	2	-0.267353	NA	2.31311	0.209799	2.33084	0.0590968	4.91131	0.0023757	not_expressed
AARA000375	14	10	13	1	0	0	22	40	12	1	1	1	-0.419919	0.616716	1.5181	0.289836	3.36582	0.00017172	5.30383	3.12e-06	not_expressed
AARA000376	3	2	2	0	0	0	6	11	4	0	0	1	0.2058	NA	1.65681	0.410876	2.95107	0.0362505	4.40208	0.00888848	not_expressed
AARA000377	23	32	24	0	0	0	49	52	14	0	0	0	-0.901298	0.143064	0.326117	0.892007	6.35716	2.05e-05	7.58457	1.4e-07	unbiased
AARA000378	106	128	125	350	543	529	221	197	80	126	145	97	-0.929241	0.0125589	-1.39698	5.01e-06	-0.691901	0.0315002	-1.15964	0.000156959	Fe_RT_weak
AARA000379	1206	1175	1433	414	517	428	2607	3578	1499	908	436	721	-0.378929	0.0443741	1.02331	4.89e-11	0.872031	9.95e-09	2.27427	2.31e-51	unbiased
AARA000380	170	142	168	455	772	714	385	480	209	131	66	100	-0.224451	0.32675	-2.23951	8.76e-45	0.82179	9.16e-07	-1.19327	3.21e-15	Fe_RT_weak
AARA000381	203	148	165	187	316	272	639	875	342	283	175	327	0.439484	0.078445	0.48775	0.0152859	0.185032	0.374995	0.233297	0.269369	unbiased
AARA000382	22	17	29	97	151	166	76	81	27	117	70	63	0.0227771	0.974129	-0.252585	0.41049	-1.50882	2.51e-07	-1.78418	1.58e-08	unbiased
AARA000383	41	27	53	544	748	821	115	100	42	199	173	181	-0.296508	0.526404	-1.43013	1.05e-08	-2.18107	1.28e-16	-3.3147	2.68e-34	Fe_RT_weak
AARA000384	1	1	3	25	40	41	4	2	1	14	2	4	-0.856163	0.574626	-1.97519	0.0013991	-2.36622	0.00326435	-3.48524	1.24e-05	Fe_RT_weak
AARA000385	373	361	448	40	86	130	2023	2730	1056	150	58	240	0.88409	0.0755894	1.25204	0.00233689	2.6553	8.87e-12	3.02325	1.31e-14	unbiased
AARA000386	76	70	66	2	3	3	504	676	313	14	2	25	1.42978	0.000201899	2.65219	3.28e-05	4.16309	9.11e-26	5.38551	4.23e-20	Ma_Car_weak
AARA000387	195	154	172	16	23	19	961	1349	535	20	2	29	1.04023	0.0029409	0.228051	0.623254	4.75515	3.37e-41	3.94297	1.81e-29	Ma_Car_weak
AARA000388	93	85	90	67	89	74	284	348	113	155	87	138	0.0441271	0.912665	1.16912	6.39e-08	-0.104681	0.6477	1.02032	4.08e-06	unbiased
AARA000389	148	143	147	72	81	101	736	528	203	219	263	218	0.321407	0.569786	1.97444	2.37e-08	-0.0820805	0.841278	1.57095	1.1e-05	unbiased
AARA000390	8	7	6	0	0	3	18	15	8	0	4	5	-0.385047	0.780409	1.92495	0.0854272	1.04799	0.23298	3.35799	0.00105057	unbiased
AARA000391	146	126	125	466	781	566	230	388	177	45	23	34	-0.376228	0.197262	-3.67616	1.24e-53	1.93141	3.79e-15	-1.36853	2.84e-11	Fe_RT_specific
AARA000392	5	9	5	0	0	0	26	14	4	0	0	0	-0.21075	NA	0.297971	0.903966	5.22779	0.00147233	5.73651	0.000347163	not_expressed
AARA000393	6	3	3	1	0	0	31	16	9	0	0	0	0.858056	NA	-0.912364	0.653864	5.55279	0.000512098	3.78237	0.0041558	unbiased
AARA000394	1	1	1	0	0	0	5	6	3	0	0	0	0.892337	NA	0.25778	0.91648	4.09822	0.0248983	3.46367	0.0655988	not_expressed
AARA000395	4	4	2	0	0	0	10	16	7	0	0	0	0.356021	NA	0.289627	0.906814	5.03182	0.00261992	4.96543	0.00267701	not_expressed
AARA000396	2	2	1	0	0	0	13	12	9	0	0	0	1.4664	NA	0.280415	0.909679	5.22577	0.00218306	4.03979	0.0203702	unbiased
AARA000397	168	182	218	328	475	413	642	772	328	156	35	122	0.225779	0.651251	-1.56626	2.28e-07	1.49905	7.38e-07	-0.292983	0.357364	unbiased
AARA000398	24	26	27	49	67	76	47	49	27	40	14	34	-0.685181	0.0978668	-0.686383	0.0289519	-0.505445	0.128384	-0.506647	0.113687	unbiased
AARA000399	14	14	9	0	0	0	60	61	30	1	1	3	0.652984	0.334612	3.18518	0.039441	3.79877	2.97e-07	6.33096	5.81e-06	unbiased
AARA000400	5	5	5	0	0	0	20	32	8	1	1	1	0.553306	0.611816	2.71403	0.110152	3.07959	0.00131203	5.24031	0.00053753	unbiased
AARA000401	45	52	56	0	0	2	174	181	78	6	5	4	0.111641	0.835475	2.92451	0.00243231	3.76386	6.96e-17	6.57673	3.25e-14	unbiased
AARA000402	92	82	108	154	206	174	271	281	124	157	111	92	-0.121846	0.778587	-0.0972679	0.718837	-0.150327	0.563235	-0.125749	0.633355	unbiased
AARA000403	103	106	93	3	2	1	623	598	230	10	1	11	0.841524	0.0237647	2.144	0.00265471	4.95845	5.25e-32	6.26093	3.57e-24	unbiased
AARA000404	12	9	11	230	330	329	22	17	3	32	11	16	-1.01969	0.0762852	-3.46139	1.43e-24	-1.51956	0.000293922	-3.96126	7.48e-26	Fe_RT_strong
AARA000405	66	83	106	175	276	190	492	695	298	2	13	2	1.15245	0.00321075	-4.60455	2.47e-23	5.23407	4.2e-30	-0.522943	0.141541	Ma_Car_weak
AARA000406	33	31	35	4	6	1	81	214	98	8	4	16	0.620033	0.340712	1.72201	0.0104662	2.7658	3.87e-08	3.86777	1.47e-10	unbiased
AARA000407	226	255	256	43	42	22	962	1911	647	111	45	84	0.817549	0.0246173	1.53897	5.97e-06	2.80958	1.91e-20	3.531	3.79e-28	unbiased
AARA000408	43	42	42	59	79	79	156	160	65	51	12	41	0.181911	0.739462	-0.649416	0.0505824	0.864693	0.00682986	0.0333654	0.924513	unbiased
AARA000409	164	160	164	278	408	316	382	559	208	185	62	190	-0.180289	0.694278	-0.78595	0.00375131	0.37613	0.183004	-0.229532	0.419888	unbiased
AARA000410	45	42	41	66	107	86	118	115	58	58	20	47	-0.186901	0.694205	-0.61165	0.0328796	0.225369	0.458338	-0.199381	0.503548	unbiased
AARA000411	4	5	2	0	0	0	21	20	7	0	0	0	0.714199	NA	0.295115	0.905135	5.46684	0.000879204	5.04776	0.00195783	unbiased
AARA000412	8	5	3	0	0	0	28	41	15	0	2	1	0.975186	0.293167	2.70558	0.108085	3.55754	0.000156834	5.28793	0.000419268	unbiased
AARA000413	304	265	305	315	464	371	583	1012	408	172	53	255	-0.198481	0.760949	-0.853229	0.0229331	1.06097	0.0040512	0.40622	0.288951	unbiased
AARA000414	37	33	30	36	81	62	146	125	68	105	79	56	0.395029	0.449293	0.935847	0.00561223	-0.538658	0.111046	0.00215972	0.99531	unbiased
AARA000415	1	4	2	0	0	0	9	6	4	0	1	2	0.111753	NA	2.85844	0.110311	1.53923	0.205986	4.28591	0.0101139	not_expressed
AARA000416	213	169	200	330	479	485	441	887	367	144	63	171	0.152679	0.752827	-1.33587	8.81e-07	1.14717	2.62e-05	-0.341372	0.22685	unbiased
AARA000417	13	12	18	10	12	8	47	106	34	51	19	63	0.684786	0.269731	2.525	5.11e-08	-0.553026	0.192557	1.28719	0.0114192	unbiased
AARA000418	250	269	285	311	425	325	1040	1359	588	1137	457	1064	0.502853	0.077213	1.72728	1.97e-15	-0.826738	0.000169978	0.397688	0.0880291	Ma_RT_weak
AARA000419	45	690	979	13	5	2	320	372	191	62	301	3	-2.07344	0.24576	4.16674	0.00154454	-0.0468287	0.976271	6.19335	1.46e-06	unbiased
AARA000420	59	59	86	124	207	203	173	143	61	145	166	134	-0.498899	0.275878	0.282509	0.406658	-1.35194	1.73e-05	-0.570535	0.0841739	unbiased
AARA000421	9	3	7	3	5	6	28	28	11	224	160	143	0.413363	0.600659	5.65294	1.23e-32	-4.02444	1.87e-32	1.21514	0.0441755	Ma_RT_specific
AARA000422	1595	1358	1497	595	729	763	7134	6059	2539	1097	1287	1157	0.416287	0.300831	1.28206	5.85e-06	1.01371	0.000356244	1.87949	1.39e-11	unbiased
AARA000423	2	4	4	0	0	0	8	8	4	9	5	1	-0.344478	NA	4.84715	0.00182241	-0.581129	0.527828	4.6105	0.00311191	not_expressed
AARA000424	3	1	2	0	1	0	15	8	4	149	125	104	0.748993	0.529917	8.25627	1.5e-14	-4.83407	1.26e-24	2.6732	0.031544	Ma_RT_specific
AARA000425	336	310	342	436	685	651	1009	1183	513	441	237	421	0.0634485	0.810673	-0.231694	0.123651	0.26884	0.068083	-0.0263024	0.871179	unbiased
AARA000426	6	8	9	0	1	1	56	57	18	223	149	167	1.08213	0.0390523	8.0402	7.14e-21	-3.11232	3.77e-27	3.84575	2.95e-05	Ma_RT_specific
AARA000427	12	18	19	2	1	1	41	52	14	53	34	22	-0.313762	0.691954	4.97896	5.83e-11	-1.12616	0.010391	4.16656	7.9e-08	Ma_RT_specific
AARA000428	81	67	68	169	304	256	244	349	125	100	32	77	0.310773	0.405931	-1.3617	4.59e-08	0.748431	0.00342083	-0.924041	0.000208501	Fe_RT_weak
AARA000429	10	3	13	19	43	39	16	43	21	7	1	9	0.27478	0.798569	-2.06775	0.000836822	1.22581	0.0555079	-1.11671	0.0584722	unbiased
AARA000430	4260	4020	4464	5376	7564	7406	8405	7007	2988	7218	8062	6345	-0.866561	0.0087843	0.623677	0.0309468	-1.35841	1.14e-06	0.131825	0.674309	unbiased
AARA000431	152	118	180	391	597	516	448	623	271	208	113	183	0.196088	0.411812	-1.11941	4.21e-13	0.380589	0.0188661	-0.934906	2.04e-09	Fe_RT_weak
AARA000432	27	28	33	237	397	380	93	83	34	62	68	53	-0.141266	0.814504	-1.93063	8.21e-12	-0.902188	0.00331228	-2.69155	4.36e-19	Fe_RT_weak
AARA000433	586	536	606	461	657	612	2102	3328	1440	1428	737	1067	0.606457	6.63e-05	1.344	6.96e-23	0.066762	0.664904	0.804305	8.98e-09	unbiased
AARA000434	32	28	29	58	95	102	111	102	45	58	58	66	0.14464	0.798178	0.0246098	0.938666	-0.57293	0.050557	-0.69296	0.025372	unbiased
AARA000435	129	139	141	0	2	0	769	844	383	39	17	28	0.901637	4.89e-05	5.23871	4.13e-10	3.5389	4.99e-48	7.87597	4.09e-22	unbiased
AARA000436	1544	1339	1499	289	391	293	3099	8759	3871	974	742	2343	0.470087	0.462529	2.48125	2.03e-09	0.924258	0.0310384	2.93542	8.38e-13	unbiased
AARA000437	143	142	114	24	36	20	506	605	306	108	87	90	0.458099	0.139714	2.30339	5e-16	1.27061	9.42e-08	3.1159	2.62e-29	unbiased
AARA000438	80	72	84	23	28	49	307	901	451	77	44	68	1.46469	0.00045101	1.3618	0.000854318	2.13137	1.2e-08	2.02848	3.04e-07	Ma_Car_weak
AARA000439	588	531	616	451	662	688	1351	3037	1337	595	368	992	0.34779	0.477533	0.570344	0.085884	0.531089	0.109005	0.753642	0.0197207	unbiased
AARA000440	538	460	539	130	205	170	962	2606	1167	462	304	743	0.256298	0.65216	2.02709	2.77e-09	0.63022	0.074	2.40101	1.21e-12	unbiased
AARA000441	31	25	22	36	54	51	42	25	16	32	69	27	-1.24207	0.0683536	0.470557	0.403978	-1.74769	0.00101045	-0.0350639	0.952859	unbiased
AARA000442	44	38	49	202	321	312	123	142	52	249	88	214	-0.134154	0.799341	-0.176202	0.523193	-1.80715	1.96e-12	-1.8492	7.35e-12	unbiased
AARA000443	213	170	178	605	877	813	762	884	365	288	155	165	0.440636	0.0723894	-1.46007	8.31e-15	0.681541	0.000439396	-1.21916	1.07e-10	Fe_RT_weak
AARA000444	4	3	2	242	357	386	12	9	1	147	126	113	-0.167412	0.889917	-0.842579	0.00304575	-5.17997	9.9e-37	-5.85514	3.03e-28	unbiased
AARA000445	10	9	6	16	38	29	24	23	6	19	18	23	-0.345577	0.685298	0.0473739	0.922628	-1.27037	0.00471545	-0.877416	0.0746563	unbiased
AARA000446	324	276	337	557	770	745	325	469	224	190	119	140	-1.24908	3.56e-17	-1.74206	3e-32	0.151548	0.370858	-0.34143	0.0181633	Fe_RT_weak
AARA000447	844	771	856	77	130	1900	2310	2750	876	224	75	199	-0.173946	0.911449	-1.53909	0.0662958	2.43667	0.00280569	1.07153	0.202548	unbiased
AARA000448	38	60	88	104	140	134	79	202	92	64	16	79	-0.346961	0.648345	-0.849458	0.074286	0.272549	0.595565	-0.229948	0.648699	unbiased
AARA000449	93	74	89	330	467	521	182	189	91	237	229	175	-0.519081	0.145495	-0.517251	0.0470384	-1.54989	1.34e-09	-1.54806	1.86e-09	unbiased
AARA000450	57	45	55	233	324	326	77	91	41	85	103	50	-0.961373	0.0271867	-1.33673	7.39e-05	-1.30052	0.000214115	-1.67587	8.32e-07	Fe_RT_weak
AARA000451	0	0	0	0	0	0	3	2	1	66	38	37	2.32734	0.336251	8.36724	4.53e-08	-5.5193	2.31e-14	0.520596	0.816797	Ma_RT_specific
AARA000452	557	569	612	2187	3346	2165	886	2415	874	350	89	325	-0.151178	0.830939	-2.9287	3.93e-15	1.44708	0.000153557	-1.33044	0.000429251	Fe_RT_strong
AARA000453	42	53	51	180	283	309	188	199	97	125	36	97	0.352286	0.439864	-1.15974	5.36e-05	-0.059554	0.863365	-1.57158	8.04e-08	Fe_RT_weak
AARA000454	262	251	289	198	328	273	747	1936	859	125	34	86	0.769542	0.0674973	-1.29082	0.000204933	2.87786	9e-18	0.817494	0.0163033	unbiased
AARA000455	0	1	7	0	0	0	6	19	5	26	17	6	0.467953	0.794241	6.33608	2.57e-05	-1.77547	0.0470867	4.09265	0.0092302	Ma_RT_specific
AARA000456	2	0	0	138	243	197	2	1	1	8	1	4	-0.474801	0.822608	-4.99158	3.18e-23	-2.53046	0.00303784	-7.04723	2.08e-14	Fe_RT_specific
AARA000457	1	0	2	42	89	97	0	0	0	4	0	1	-3.40274	0.0931968	-4.97231	2.05e-10	-3.72512	0.0169336	-5.29469	4.47e-09	Fe_RT_specific
AARA000458	110	104	95	41	64	67	662	790	285	152	32	99	1.05623	0.00672022	1.09506	0.00216718	1.61702	1.27e-06	1.65586	1.8e-06	Ma_Car_weak
AARA000459	905	905	1004	2242	3035	2746	1819	3398	1349	1983	622	1373	-0.176396	0.69169	-0.62358	0.0179712	-0.260904	0.347787	-0.708089	0.00636074	unbiased
AARA000460	24	25	29	76	131	98	70	95	40	42	19	28	0.00268536	0.997223	-1.31365	6.76e-07	0.169244	0.581051	-1.14709	2.14e-05	Fe_RT_weak
AARA000461	180	148	167	94	136	124	382	424	199	166	127	140	-0.355073	0.117299	0.769562	3.89e-05	0.164889	0.38818	1.28952	1.06e-12	unbiased
AARA000462	152	201	223	115	142	112	622	893	412	218	236	97	0.367397	0.54407	1.09858	0.00519072	0.685835	0.082903	1.41702	0.000236633	unbiased
AARA000463	278	359	498	151	230	114	1390	1731	796	357	309	97	0.414941	0.575486	1.12768	0.0178391	1.24776	0.00769852	1.9605	2.02e-05	unbiased
AARA000464	0	0	1	0	0	0	0	2	2	0	0	1	0.713476	NA	1.6516	NA	0.909014	NA	1.84714	NA	not_expressed
AARA000465	45	32	32	0	0	0	179	305	139	0	1	26	1.09434	0.404854	4.98398	0.000484506	3.36402	0.000234075	7.25367	1.56e-07	unbiased
AARA000466	1	0	0	0	0	0	0	1	1	0	0	1	-0.0932253	NA	1.67653	NA	0.137455	NA	1.90721	NA	not_expressed
AARA000467	0	0	0	0	0	0	0	0	0	0	0	2	-0.386121	NA	2.12072	NA	-2.24109	NA	0.265748	NA	not_expressed
AARA000468	138	114	141	223	313	287	191	330	160	100	58	100	-0.569134	0.021183	-1.21581	4.78e-09	0.383937	0.0819653	-0.262737	0.215358	unbiased
AARA000469	0	0	0	0	0	0	0	0	0	0	0	0	NA	NA	NA	NA	NA	NA	NA	NA	not_expressed
AARA000470	1	0	1	0	0	1	9	6	2	1	1	4	1.54509	NA	2.5044	0.0970178	0.419921	0.736496	1.37923	0.411558	not_expressed
AARA000471	1	0	1	1	0	0	1	2	0	0	0	0	-0.713161	NA	-1.31601	NA	1.82668	NA	1.22383	NA	not_expressed
AARA000472	108	92	61	3	5	1	0	4	1	0	0	0	-6.96905	2.25e-19	-3.27832	0.0364278	1.91437	0.24955	5.6051	2.44e-18	Fe_Car_specific
AARA000473	19	20	15	80	105	124	65	45	27	37	30	34	-0.0199726	0.979391	-1.12697	0.000547039	-0.585946	0.0970267	-1.69294	1.1e-06	Fe_RT_weak
AARA000474	24	30	40	91	134	136	76	52	18	66	62	48	-0.76828	0.13242	-0.519649	0.171677	-1.37472	0.000252794	-1.12608	0.00278033	unbiased
AARA000475	21	25	21	62	93	80	91	84	38	70	25	38	0.276744	0.612165	-0.392329	0.226183	-0.321041	0.3325	-0.990114	0.00276579	unbiased
AARA000476	31	29	46	72	117	107	73	110	58	53	78	56	-0.157325	0.813829	-0.102924	0.803033	-0.722262	0.0431694	-0.667861	0.0685923	unbiased
AARA000477	12	13	18	66	132	124	34	40	13	136	77	109	-0.389239	0.472886	0.477269	0.0573465	-2.93022	6.77e-27	-2.06372	6.36e-11	unbiased
AARA000478	21	24	20	114	173	194	69	60	27	51	43	31	-0.127931	0.844353	-1.43567	2.61e-06	-0.745758	0.0249534	-2.0535	3.21e-10	Fe_RT_weak
AARA000479	10	18	17	539	804	713	20	26	16	8	8	35	-0.86776	0.212903	-4.80756	3.19e-26	-0.707928	0.183589	-4.64773	3.4e-24	Fe_RT_strong
AARA000480	133	128	135	401	586	579	393	314	155	395	166	292	-0.254045	0.505458	-0.446838	0.0677735	-0.974204	4.33e-05	-1.167	9.94e-07	unbiased
AARA000481	49	57	75	120	224	201	159	140	62	177	146	122	-0.386132	0.369961	0.226087	0.450735	-1.37463	7.74e-07	-0.762407	0.00883367	unbiased
AARA000482	359	328	386	57	82	45	1020	2882	1276	3018	1101	3874	0.895428	0.0826528	5.77603	6.95e-47	-1.57917	8.66e-05	3.30143	5.26e-16	Ma_RT_strong
AARA000483	54	66	52	0	3	2	287	411	156	8	12	10	0.892578	0.0060724	2.89147	4.67e-05	3.71533	9.37e-25	5.71423	1.48e-18	unbiased
AARA000484	3	2	4	0	1	0	12	23	8	10	9	5	0.836514	0.44981	4.37581	0.000235579	-0.2498	0.722789	3.2895	0.00834247	not_expressed
AARA000485	1	4	13	1	5	0	53	38	10	39	51	1	0.990918	0.572943	4.17569	0.000315313	-1.03986	0.361919	2.14491	0.0781792	unbiased
AARA000486	0	0	0	0	0	0	0	1	0	0	1	0	0.514721	NA	1.59747	NA	-0.823311	NA	0.259442	NA	not_expressed
AARA000487	0	0	0	0	0	0	0	0	0	0	0	0	NA	NA	NA	NA	NA	NA	NA	NA	not_expressed
AARA000488	0	0	0	0	0	0	0	0	1	1531	915	1018	0.0980392	0.978945	12.7815	4.53e-19	-12.1272	3.1e-29	0.556229	0.800248	Ma_RT_specific
AARA000489	1	2	1	0	0	0	2	1	0	40	30	22	-1.65714	0.309239	7.61809	3.57e-07	-5.80269	2.49e-10	3.47254	0.0350967	Ma_RT_specific
AARA000490	0	0	0	0	1	1	0	2	1	559	411	340	1.0931	0.696493	9.53218	1.62e-24	-9.59712	4.91e-32	-1.15804	0.520377	Ma_RT_specific
AARA000491	181	160	213	63	88	63	841	1206	489	176	54	133	0.798675	0.005618	1.15601	1.99e-05	1.80122	4.16e-13	2.15856	9.74e-17	unbiased
AARA000492	132	109	123	191	269	245	483	603	255	379	208	229	0.48785	0.0297604	0.661838	0.000215405	-0.321395	0.0754045	-0.147407	0.465101	unbiased
AARA000493	3352	3026	3484	4032	5581	5589	5684	4951	2199	5952	8490	4896	-1.00435	0.0135698	0.916294	0.00850509	-1.74091	2.84e-07	0.179728	0.634971	unbiased
AARA000494	218	180	246	349	578	524	483	715	253	334	106	201	-0.244219	0.528909	-0.761815	0.00207632	0.161539	0.553069	-0.356057	0.160474	unbiased
AARA000495	210	192	219	338	452	405	598	791	352	677	465	672	0.103983	0.646997	1.06535	2.31e-17	-1.10461	4.09e-19	-0.143243	0.328299	Ma_RT_weak
AARA000496	150	124	165	321	468	476	545	600	276	377	229	305	0.317144	0.115834	-0.00885987	0.956878	-0.392283	0.00818411	-0.718287	2.78e-06	unbiased
AARA000497	301	259	318	378	541	501	850	1400	547	302	105	284	0.26927	0.463602	-0.626956	0.0114651	1.00678	2.97e-05	0.110555	0.681154	unbiased
AARA000498	48	45	46	65	114	74	68	209	76	47	17	38	-0.0712932	0.919901	-0.868749	0.0252087	0.753684	0.0518154	-0.0437712	0.91564	unbiased
AARA000499	39	41	56	56	100	87	123	130	69	62	57	62	-0.113332	0.813634	0.0789121	0.795532	-0.212879	0.438756	-0.0206341	0.94483	unbiased
AARA000500	26	24	31	324	535	450	130	134	63	117	82	51	0.631944	0.14405	-1.88664	2.32e-11	-0.662551	0.0298264	-3.18114	5.81e-25	Fe_RT_weak
AARA000501	11	6	5	6	1	3	16	17	9	40	27	27	-0.432986	0.631848	3.58249	2.35e-09	-2.17049	4.08e-06	1.84499	0.00595064	Ma_RT_specific
AARA000502	17	12	15	2	6	8	38	36	11	44	27	26	-0.464247	0.48511	3.02927	2.35e-09	-1.2575	0.00171952	2.23601	3e-05	Ma_RT_specific
AARA000503	7	19	11	0	1	1	80	86	46	0	0	1	1.14882	0.0716391	-0.227954	0.897244	6.04197	1.06e-07	4.66519	2.25e-06	unbiased
AARA000504	16	23	11	10	8	7	28	27	19	23	11	17	-0.769223	0.216449	1.42438	0.00613691	-0.424815	0.389066	1.76878	0.000516845	not_expressed
AARA000505	6	77	85	0	2	0	5	4	2	2	2	0	-5.06683	3.02e-07	1.26941	0.372723	0.325097	0.803292	6.66134	6.06e-09	Fe_Car_specific
AARA000506	362	436	438	115	136	68	587	1169	475	277	45	304	-0.536927	0.476209	1.27589	0.0119004	0.874874	0.0867249	2.68769	3.37e-08	unbiased
AARA000507	51	48	65	153	289	227	120	212	102	88	23	54	0.0445759	0.943154	-1.58905	2.45e-07	0.434975	0.190798	-1.19865	9.88e-05	Fe_RT_weak
AARA000508	370	357	450	286	509	452	874	2189	906	710	320	507	0.369885	0.343682	0.746979	0.00667315	0.358868	0.207647	0.735962	0.0071142	unbiased
AARA000509	21	16	17	1	2	5	107	96	48	28	40	21	0.837845	0.171137	3.90155	1.5e-09	0.380242	0.426815	3.44395	1.63e-07	unbiased
AARA000510	1	0	1	0	1	1	6	15	3	32	5	25	1.88842	0.222871	4.95249	4.28e-06	-2.34599	0.00151304	0.718073	0.631958	not_expressed
AARA000511	1	0	0	0	0	0	2	2	0	7	0	1	0.357187	NA	3.95054	0.0408216	-1.69757	0.326029	1.89579	0.367448	not_expressed
AARA000512	20	24	17	61	103	71	61	75	26	44	12	25	-0.0152788	0.983553	-1.1063	0.00144946	-0.0246893	0.953637	-1.11571	0.00168658	Fe_RT_weak
AARA000513	326	263	304	231	410	307	739	1053	363	340	104	254	-0.156537	0.733964	-0.0286031	0.92454	0.604841	0.0237209	0.732775	0.00538655	unbiased
AARA000514	2836	2649	2819	3972	5607	5511	5337	4123	1806	5226	6286	4647	-0.953753	0.00885282	0.644241	0.0436701	-1.65006	7.34e-08	-0.0520634	0.880402	unbiased
AARA000515	0	1	2	44	76	82	5	3	2	17	7	18	0.23408	0.898065	-1.79688	2.22e-05	-3.00257	8.63e-07	-5.03353	1.21e-09	Fe_RT_weak
AARA000516	57	57	62	81	141	97	131	261	130	66	27	70	0.212645	0.685298	-0.523731	0.109808	0.69698	0.0276838	-0.0393962	0.909523	unbiased
AARA000517	302	258	272	354	448	268	936	2083	812	235	111	196	0.795921	0.0211628	-0.56831	0.0601781	1.78374	3.84e-10	0.419509	0.162086	unbiased
AARA000518	3	5	3	1	0	0	12	21	6	20	2	23	0.365005	0.807719	5.03471	2.66e-05	-1.17974	0.117762	3.48997	0.00543176	unbiased
AARA000519	1	4	3	0	0	0	4	5	3	7	8	6	-0.737445	NA	5.43427	0.000393372	-1.81317	0.024547	4.35855	0.00554546	Ma_RT_specific
AARA000520	4	3	1	0	1	0	5	2	1	12	3	2	-1.29756	NA	3.81333	0.00513654	-1.92982	0.0653501	3.18108	0.0228597	unbiased
AARA000521	19	16	19	0	1	0	49	78	30	61	22	39	0.139606	0.839818	6.44796	3.68e-10	-0.652518	0.0621367	5.65583	5e-08	unbiased
AARA000522	3	0	0	196	318	303	0	0	0	1	0	0	-3.42846	0.0867388	-8.68961	1.83e-14	-1.92352	0.29102	-7.18467	5.63e-18	Fe_RT_specific
AARA000523	32	17	27	117	184	163	43	36	23	129	128	106	-0.912598	0.0389273	0.167123	0.612051	-2.86895	1.11e-19	-1.78923	4.6e-08	unbiased
AARA000524	787	782	888	152	279	158	764	1236	452	189	28	158	-1.40563	0.00325228	-0.280893	0.549973	1.72619	4.24e-05	2.85093	3.32e-12	Fe_Car_weak
AARA000525	228	190	232	318	432	442	798	953	457	246	337	211	0.394922	0.381732	-0.0258416	0.940388	0.34892	0.284862	-0.0718442	0.836441	unbiased
AARA000526	466	447	497	684	993	805	685	1635	641	229	108	261	-0.327592	0.428354	-1.6153	4.07e-09	1.27688	4.06e-06	-0.0108302	0.972372	unbiased
AARA000527	0	3	4	2	0	1	1	12	5	14	7	10	-0.0204128	0.992034	3.46665	0.00124567	-1.73769	0.05213	1.74937	0.142557	not_expressed
AARA000528	1	2	3	0	0	0	53	46	18	1	0	2	2.85477	0.00177487	2.71076	0.112993	4.10321	1.71e-05	3.9592	0.0127915	Ma_Car_specific
AARA000529	7	3	2	0	0	0	18	29	12	0	0	3	0.89581	NA	2.70048	0.117535	3.10106	0.0028964	4.90573	0.00163414	unbiased
AARA000530	1	6	2	0	0	0	7	13	5	4	6	3	0.0650647	NA	4.71002	0.00255787	-0.166178	0.867406	4.47877	0.00426423	unbiased
AARA000531	16	14	14	68	127	103	59	53	18	54	16	47	0.141653	0.850737	-0.909955	0.0102749	-0.863403	0.020209	-1.91501	5.93e-07	unbiased
AARA000532	104	116	154	75	115	63	226	297	133	74	17	67	-0.560222	0.235226	-0.287502	0.466113	1.07743	0.00264316	1.35015	9.97e-05	unbiased
AARA000533	221	165	238	275	367	281	271	546	196	111	28	118	-0.707564	0.117299	-1.4532	4.13e-05	0.966332	0.00734096	0.2207	0.558997	unbiased
AARA000534	14	19	17	38	54	40	32	57	15	21	4	19	-0.391323	0.55682	-1.16151	0.00618554	0.180249	0.708785	-0.589937	0.163235	unbiased
AARA000535	109	118	118	179	250	250	315	362	188	217	135	201	-0.038295	0.907781	0.165471	0.352815	-0.370947	0.0260088	-0.167182	0.359533	unbiased
AARA000536	44	36	48	39	67	58	108	213	88	79	17	54	0.286705	0.622346	0.270688	0.494651	0.470955	0.205856	0.454937	0.233516	unbiased
AARA000537	440	1361	1536	654	955	897	1385	3098	1332	670	335	530	-0.568422	0.333782	-0.263495	0.55977	0.902238	0.0311658	1.20716	0.00315812	unbiased
AARA000538	1	1	1	4	8	4	10	4	1	105	97	89	0.76792	0.616512	4.64646	1.72e-18	-5.30112	6.44e-23	-1.42258	0.139028	Ma_RT_specific
AARA000539	349	265	303	400	611	624	1182	1150	450	669	545	700	0.190268	0.582393	0.723517	0.000697235	-0.551296	0.0101396	-0.0180469	0.940884	unbiased
AARA000540	9	6	9	50	79	76	22	26	16	20	7	24	0.0565399	0.951075	-1.55001	2.22e-05	-0.654256	0.116667	-2.2608	6.78e-08	Fe_RT_weak
AARA000541	32	24	35	1	8	2	165	183	83	63	15	46	0.862504	0.0767002	3.81565	9.44e-12	0.821837	0.0335446	3.77499	1.92e-11	unbiased
AARA000542	1	0	2	0	0	1	0	4	6	3	0	3	0.624111	NA	2.26817	0.187136	0.114216	0.947857	1.75828	0.321815	not_expressed
AARA000543	64	52	77	50	72	55	153	132	54	74	58	50	-0.57687	0.128488	0.520588	0.0973153	-0.179857	0.579978	0.9176	0.00222429	unbiased
AARA000544	78	88	112	138	209	161	253	298	113	164	43	166	-0.150275	0.810255	-0.0527573	0.901202	-0.163779	0.664904	-0.0662618	0.862949	unbiased
AARA000545	29	23	24	385	512	501	102	68	34	247	121	215	0.0435154	0.946394	-0.826018	0.0019281	-2.51064	7.44e-20	-3.38017	9.1e-30	unbiased
AARA000546	175	175	176	263	410	315	402	454	183	246	255	263	-0.421462	0.161222	0.146075	0.55231	-0.663107	0.0032328	-0.0955703	0.705685	unbiased
AARA000547	0	3	1	1	0	1	9	10	5	184	69	183	1.10166	0.371806	7.75275	3.21e-17	-5.11916	5.74e-27	1.53193	0.200002	Ma_RT_specific
AARA000548	35	38	47	45	36	35	171	216	67	156	144	213	0.479801	0.296619	2.58228	2.24e-16	-1.29651	1.51e-05	0.805967	0.0207383	Ma_RT_strong
AARA000549	26	31	34	36	26	25	107	138	50	95	70	128	0.28027	0.609241	2.16462	4.54e-11	-1.06305	0.000605689	0.821302	0.0241429	Ma_RT_weak
AARA000550	64	44	41	289	609	472	125	249	115	49	9	42	0.337603	0.594446	-3.32517	8.24e-18	1.32663	0.00101299	-2.33614	6.11e-10	Fe_RT_strong
AARA000551	5	8	9	69	136	97	31	43	26	7	4	5	0.82445	0.165924	-3.71304	4.7e-16	1.6095	0.00096958	-2.92799	2.5e-12	Fe_RT_strong
AARA000552	17	18	22	117	268	216	42	89	38	9	4	27	0.181514	0.835977	-3.38384	3.54e-13	1.0388	0.0375922	-2.52655	1.74e-08	Fe_RT_strong
AARA000553	1	0	0	0	0	0	1	0	1	288	302	143	-0.46158	0.864879	10.5434	5.64e-13	-9.20112	7.37e-21	1.80383	0.335165	Ma_RT_specific
AARA000554	1	2	3	43	55	55	11	12	7	12	5	12	0.884527	0.398729	-1.94531	4.6e-06	-0.949407	0.0625829	-3.77924	6.55e-09	Fe_RT_weak
AARA000555	19	8	5	38	66	38	24	26	10	13	1	11	-0.498354	0.598292	-2.06749	0.000392961	0.264902	0.696752	-1.30423	0.0214621	Fe_RT_weak
AARA000556	5	5	3	21	34	46	16	15	5	14	14	17	0.0473856	0.970195	-0.65687	0.155592	-1.38906	0.00464998	-2.09331	0.000148503	unbiased
AARA000557	63	65	71	301	492	424	242	248	83	190	131	121	0.0982681	0.835711	-0.971056	3.41e-05	-0.719006	0.00305634	-1.78833	1.33e-13	unbiased
AARA000558	150	123	150	54	66	70	249	238	105	662	480	349	-0.898187	0.00602881	3.43717	5.62e-35	-2.39442	3.09e-19	1.94093	1.6e-11	Ma_RT_strong
AARA000559	52	54	50	297	476	409	215	232	107	108	34	68	0.442035	0.207233	-2.06133	7.24e-18	0.408515	0.118872	-2.09485	1.14e-17	Fe_RT_weak
AARA000560	144	139	167	805	1322	1188	590	714	256	463	263	291	0.375123	0.120394	-1.23383	5.72e-13	-0.450724	0.0126505	-2.05967	1.73e-31	Fe_RT_weak
AARA000561	1426	1108	1254	17	22	28	5727	7547	3150	144	85	322	0.715812	0.13569	3.43776	1.1e-17	3.8379	1.08e-26	6.55985	6.46e-63	unbiased
AARA000562	256	208	272	42	77	51	1134	2635	1133	299	45	212	1.34699	0.00932556	2.04404	6.53e-06	2.19777	5.28e-07	2.89481	7.54e-11	Ma_Car_weak
AARA000563	120	64	78	5	7	6	583	568	269	62	47	46	1.05702	0.00153504	3.52145	3.59e-15	2.13422	8.94e-13	4.59865	6.78e-26	Ma_Car_weak
AARA000564	112	127	126	282	417	354	478	526	194	287	143	221	0.296819	0.274813	-0.24914	0.208022	-0.170432	0.399786	-0.716391	0.00019733	unbiased
AARA000565	19	14	21	50	67	62	43	34	9	41	41	29	-0.746617	0.195453	-0.183695	0.666797	-1.48712	0.000197014	-0.924201	0.0246933	unbiased
AARA000566	28	26	35	212	291	303	87	85	24	91	112	83	-0.296879	0.625443	-0.951998	0.00424826	-1.70526	5.59e-07	-2.36038	9.25e-12	unbiased
AARA000567	263	268	367	231	323	258	914	1286	519	1078	418	802	0.205026	0.544717	1.90434	5.64e-20	-0.762274	0.000280007	0.937037	1.31e-05	Ma_RT_weak
AARA000568	28	26	33	49	98	98	88	104	30	76	51	78	-0.0802392	0.889656	0.232638	0.431101	-0.974063	0.000427282	-0.661186	0.0289752	unbiased
AARA000569	104	103	103	177	285	282	431	449	171	321	360	242	0.342976	0.457717	0.859175	0.00411183	-0.953612	0.00129262	-0.437413	0.165468	unbiased
AARA000570	106	73	101	189	278	243	341	499	253	272	82	208	0.612304	0.0929277	0.061295	0.858718	0.0148049	0.965165	-0.536204	0.0671954	unbiased
AARA000571	21	27	21	298	493	483	61	66	19	130	89	89	-0.34808	0.468237	-1.55552	4.05e-11	-2.15785	2.59e-16	-3.36529	8.89e-34	Fe_RT_weak
AARA000572	174	179	196	404	652	537	774	1158	459	353	211	361	0.719782	1.36e-05	-0.318956	0.037878	0.318165	0.0361528	-0.720573	2.32e-06	unbiased
AARA000573	100	77	99	183	352	296	260	331	123	76	50	59	-0.0366319	0.92485	-1.67465	3.24e-16	0.876009	3.38e-05	-0.762014	0.000124066	Fe_RT_weak
AARA000574	2982	2765	3353	169	307	190	3039	3691	1665	412	236	374	-1.49266	6.52e-22	1.08131	1.6e-10	2.00736	1.42e-37	4.58132	5.73e-184	Fe_Car_weak
AARA000575	40	36	39	28	27	36	134	197	95	68	47	43	0.517633	0.151186	1.24895	2.41e-05	0.394965	0.151859	1.12629	0.000208828	unbiased
AARA000576	162	165	167	366	481	434	567	790	340	248	115	180	0.389521	0.0553757	-0.804475	6.06e-07	0.621473	0.000124041	-0.572524	0.000446559	unbiased
AARA000577	114	103	129	221	319	339	363	348	151	214	176	170	-0.0715771	0.862469	-0.153082	0.517826	-0.453428	0.041859	-0.534933	0.0170911	unbiased
AARA000578	82	73	82	314	508	398	206	281	133	77	26	53	0.0137045	0.975745	-2.52215	1.85e-31	0.989665	1.3e-05	-1.54619	4.64e-14	Fe_RT_strong
AARA000579	16	13	5	148	259	233	36	35	18	361	196	191	-0.00257242	0.997533	0.691893	0.0199009	-4.06316	8.47e-38	-3.3687	1.03e-19	unbiased
AARA000580	119	123	155	215	308	273	341	545	214	187	48	120	0.0708877	0.894605	-0.772861	0.00729148	0.64296	0.02611	-0.200789	0.508058	unbiased
AARA000581	422	459	454	296	444	429	814	1259	457	554	175	486	-0.49847	0.149609	0.457591	0.0960833	0.0481624	0.877289	1.00422	0.000121457	unbiased
AARA000582	17	16	17	788	1163	1172	31	37	12	440	190	302	-0.727422	0.0907906	-1.30851	4.85e-11	-4.54864	1.34e-71	-5.12973	4e-76	Fe_RT_weak
AARA000583	23	17	20	183	294	309	54	41	10	79	92	81	-0.628402	0.291241	-1.09157	0.00247612	-2.40279	2.27e-10	-2.86596	9.29e-14	Fe_RT_weak
AARA000584	10	11	7	78	130	124	21	16	11	45	47	40	-0.58037	0.386409	-0.806413	0.0142054	-2.49143	2.53e-11	-2.71747	8.48e-12	unbiased
AARA000585	194	191	190	397	459	391	721	885	365	244	96	191	0.375473	0.197676	-0.830019	0.00013346	0.876455	4.72e-05	-0.329037	0.141048	unbiased
AARA000586	0	1	1	1	6	0	3	7	1	12	12	14	0.809217	0.689722	2.876	0.00124066	-2.85281	0.000664035	-0.786031	0.550083	Ma_RT_specific
AARA000587	3664	3710	4190	4600	5952	6241	7032	4731	2012	7127	12177	4377	-1.13793	0.0477009	1.08971	0.0214742	-1.96913	1.94e-05	0.258507	0.611552	Ma_RT_weak
AARA000588	95	48	68	415	271	177	399	516	184	118	82	112	0.951161	0.072982	-1.08655	0.0101282	0.720068	0.0951246	-1.31765	0.00166631	Fe_RT_weak
AARA000589	175	177	190	86	103	83	440	724	299	240	60	177	0.0382792	0.951075	1.16723	0.000293384	0.643852	0.0441024	1.77281	1.63e-08	unbiased
AARA000590	1074	975	980	163	285	204	4789	2855	1605	253	251	301	0.241099	0.643634	0.820825	0.0123034	2.44206	2.84e-15	3.02178	1.17e-22	unbiased
AARA000591	6	3	6	0	1	0	34	34	16	43	30	14	1.0983	0.18725	6.08753	3.39e-08	-1.09063	0.0380411	3.8986	0.000783786	Ma_RT_specific
AARA000592	0	2	6	0	0	1	4	7	3	2	0	2	-0.496347	NA	1.86703	0.239506	0.765671	0.565304	3.12905	0.0319027	not_expressed
AARA000593	66	55	57	1	2	0	191	182	72	13	16	16	-0.0834635	0.889656	4.05253	5.03e-07	2.20081	1.12e-09	6.3368	2.14e-16	unbiased
AARA000594	1742	1659	1675	257	499	315	6509	5255	2640	270	315	652	0.127852	0.849042	0.72337	0.0549002	2.45736	4.37e-12	3.05288	4.27e-18	unbiased
AARA000595	3184	2738	2876	1256	1874	1763	9001	7917	3900	355	250	919	-0.131893	0.8544	-1.21608	0.00196503	2.73047	7.73e-13	1.64629	1.77e-05	unbiased
AARA000596	786	891	852	29	60	23	2365	2101	1365	54	59	94	-0.116916	0.851775	1.38895	0.000240753	3.77719	7.38e-29	5.28306	2.05e-51	unbiased
AARA000597	655	773	715	24	60	16	2042	2084	1251	38	18	81	-0.00667102	0.99492	0.901594	0.077348	4.2864	5.16e-21	5.19466	1.16e-29	unbiased
AARA000598	5229	5426	5117	170	394	118	16685	15636	8250	386	372	658	-0.000394248	0.999505	1.56128	7.07e-05	3.7626	2.22e-23	5.32428	2.64e-45	unbiased
AARA000599	4	0	1	190	339	320	4	1	1	1	2	1	-1.07184	0.42918	-7.07964	4.45e-22	-0.473511	0.653398	-6.48131	2.44e-21	Fe_RT_specific
AARA000600	53	50	68	5	10	7	373	324	115	321	85	192	0.821657	0.0876797	5.07766	4.22e-28	-0.554099	0.147206	3.70191	5.13e-15	unbiased
AARA000601	554	563	652	642	903	797	2946	2858	1295	2171	1560	1845	0.619609	0.000701723	1.7256	6.84e-28	-0.708577	9.31e-06	0.397416	0.017489	Ma_RT_weak
AARA000602	1142	1279	1456	542	844	609	2172	2902	1209	841	451	849	-0.695749	0.000211129	0.547599	0.00179405	0.520079	0.00266436	1.76343	3.63e-26	unbiased
AARA000603	11	10	9	77	95	111	19	23	6	41	31	38	-0.732849	0.200335	-0.892133	0.00207246	-2.25917	6.2e-11	-2.41845	1.98e-11	unbiased
AARA000604	464	541	601	1249	1751	1724	2694	3613	1717	619	786	593	0.94929	0.00228554	-0.687907	0.0132964	0.890335	0.00114952	-0.746862	0.00652015	unbiased
AARA000605	119	141	182	157	219	264	295	345	137	284	780	206	-0.57585	0.488047	1.63879	0.00240061	-1.94663	0.000275044	0.268004	0.653429	Ma_RT_weak
AARA000606	1503	1263	1617	1484	2182	2458	3037	2441	1053	2959	4530	2955	-0.813229	0.0715841	1.34705	0.000158456	-1.83368	1.99e-07	0.326596	0.389923	Ma_RT_weak
AARA000607	19	21	25	19	18	27	21	18	5	21	61	10	-1.94128	0.0214006	1.14325	0.106145	-2.30136	0.000934822	0.783162	0.278982	unbiased
AARA000608	28	28	38	99	114	137	99	106	33	89	106	67	-0.0895754	0.900895	0.108812	0.791631	-1.2965	0.000242468	-1.09811	0.00293582	unbiased
AARA000609	1002	784	960	1675	2519	2456	3306	3382	1597	698	527	438	0.218292	0.506261	-1.49782	5.82e-13	1.25265	2.13e-09	-0.463463	0.0305969	Fe_RT_weak
AARA000610	5	144	401	20	22	12	11	14	7	0	2	1	-5.14812	2.15e-07	-3.20806	0.00477984	1.93463	0.100737	3.8747	2.44e-05	Fe_Car_specific
AARA000611	6	18	68	1	1	4	9	8	3	0	0	0	-3.42444	0.000380146	-2.68223	0.109431	3.75021	0.0183248	4.49241	2.94e-06	Fe_Car_specific
AARA000612	0	0	0	0	0	0	0	0	0	9	8	103	-0.755231	0.842749	8.12505	4.27e-06	-8.45033	9.86e-07	0.429953	0.853617	Ma_RT_specific
AARA000613	0	0	0	0	0	0	0	0	0	341	672	1995	-0.869598	0.808949	12.0964	4.3e-14	-12.4629	1.58e-15	0.503165	0.82146	Ma_RT_specific
AARA000614	1	0	0	0	0	0	3	2	0	14	17	55	0.615407	0.818373	7.49284	1.84e-06	-5.01481	2.83e-07	1.86262	0.336297	Ma_RT_specific
AARA000615	0	0	0	0	0	0	0	0	0	0	0	0	NA	NA	NA	NA	NA	NA	NA	NA	not_expressed
AARA000616	0	0	0	0	0	0	0	0	0	0	0	0	NA	NA	NA	NA	NA	NA	NA	NA	not_expressed
AARA000617	18	13	17	0	0	0	124	150	51	2	1	2	1.33838	0.00226455	3.10945	0.040151	4.84559	3.2e-12	6.61666	1.06e-06	Ma_Car_weak
AARA000618	71	79	91	45	81	68	227	211	87	124	109	150	-0.272947	0.493358	1.47885	1.4e-08	-0.62385	0.0144939	1.12795	2.62e-05	Ma_RT_weak
AARA000619	20	21	11	11	20	11	43	40	14	13	15	20	-0.522025	0.448969	0.687821	0.18146	-0.0875296	0.872616	1.12232	0.0219756	unbiased
AARA000620	57	50	65	35	38	34	236	381	177	90	160	184	0.83482	0.0814558	2.52795	3.42e-11	-0.24229	0.549813	1.45084	0.000256903	unbiased
AARA000621	288	270	305	5	44	7	1377	1864	723	83	140	150	0.779097	0.295692	3.32107	2.19e-09	2.21523	2.55e-05	4.7572	2.62e-18	unbiased
AARA000622	19	14	12	8	4	5	55	96	38	24	27	44	0.659472	0.285086	2.89223	2.22e-08	-0.0965167	0.839838	2.13624	8.62e-05	unbiased
AARA000623	9	4	6	0	0	0	14	35	11	10	3	4	0.234923	0.844488	4.85402	0.000979242	0.761411	0.277362	5.38051	0.000207341	unbiased
AARA000624	20	18	14	1	0	0	43	81	39	13	1	4	0.278888	0.760655	3.72436	0.00126471	2.2011	0.000172274	5.64657	2.57e-07	unbiased
AARA000625	0	0	0	0	0	0	0	1	0	0	0	0	0.641537	NA	0.158724	NA	0.748561	NA	0.265748	NA	not_expressed
AARA000626	259	252	205	118	143	162	713	536	244	261	158	232	-0.338544	0.390278	1.06719	0.000101554	0.154789	0.605216	1.56053	6.16e-09	unbiased
AARA000627	35	27	36	21	38	44	66	69	43	236	244	149	-0.465674	0.410405	3.13987	1.01e-18	-2.86099	8.76e-17	0.744556	0.0626755	Ma_RT_strong
AARA000628	15	18	14	17	17	18	38	68	18	15	34	27	-0.0661631	0.945824	1.07591	0.033554	-0.504453	0.317029	0.637615	0.233597	unbiased
AARA000629	31	36	46	98	142	125	106	108	28	47	18	60	-0.349498	0.55176	-1.11081	0.00227767	-0.121388	0.772566	-0.882704	0.0157945	Fe_RT_weak
AARA000630	127	148	157	509	764	662	584	521	240	459	452	370	0.251928	0.549151	-0.0715391	0.817187	-1.02329	6.79e-05	-1.34676	1.88e-07	unbiased
AARA000631	0	0	0	0	0	0	0	0	0	0	0	0	NA	NA	NA	NA	NA	NA	NA	NA	not_expressed
AARA000632	59	46	75	150	223	204	125	125	43	65	25	75	-0.704624	0.0711904	-1.36791	5.84e-06	-0.212271	0.538141	-0.87556	0.00372383	Fe_RT_weak
AARA000633	4	0	6	0	0	0	20	48	22	54	4	41	1.76569	0.130479	7.00154	1.02e-06	-0.990757	0.237913	4.24509	0.00460378	unbiased
AARA000634	17	14	24	0	1	0	44	149	73	41	25	26	0.92937	0.150742	6.03334	1.39e-08	0.52389	0.29973	5.62786	1.34e-07	unbiased
AARA000635	99	68	54	62	93	82	303	370	133	110	132	67	0.431336	0.460105	0.928642	0.0188683	0.215814	0.610383	0.71312	0.0750129	unbiased
AARA000636	15	13	14	13	25	30	30	41	12	17	10	16	-0.438442	0.479974	-0.182222	0.694217	-0.127652	0.782831	0.128568	0.782845	unbiased
AARA000637	173	170	206	266	404	395	517	662	310	566	325	341	0.0672881	0.839777	0.673551	0.000102552	-0.750574	1.15e-05	-0.144311	0.454121	unbiased
AARA000638	331	279	349	530	802	633	822	1839	661	1113	426	840	0.375843	0.302293	0.68655	0.00795589	-0.539575	0.0383893	-0.228869	0.404289	unbiased
AARA000639	11	6	7	0	0	0	90	95	44	24	46	14	1.84499	0.0128437	6.98815	1.83e-07	0.267636	0.67752	5.4108	7.26e-05	Ma_Ubi_weak
AARA000640	433	803	613	70	67	15	1259	2476	1168	233	247	245	0.0335054	0.97482	2.6569	2.57e-07	1.65599	0.00122145	4.27938	2.39e-17	unbiased
AARA000641	106	83	99	49	79	94	267	361	168	90	140	80	0.0943886	0.890313	1.06087	0.00425351	0.221316	0.577	1.1878	0.00122106	unbiased
AARA000642	75	78	91	90	139	184	471	481	205	157	131	183	0.849596	0.00308806	0.687814	0.00635518	0.222692	0.39452	0.0609092	0.83399	unbiased
AARA000643	7087	5932	7651	1444	2164	1914	4027	6054	2251	589	366	525	-2.1538	1.96e-91	-1.43335	2.17e-36	1.98792	2.14e-70	2.70837	3.42e-143	Fe_Car_weak
AARA000644	6836	5537	6224	8615	13238	13824	12471	16400	7320	2275	1747	2295	-0.420676	0.0134773	-2.00097	5.78e-47	1.4588	1.8e-25	-0.121496	0.428259	unbiased
AARA000645	560	409	519	148	223	235	1481	2682	1289	452	733	563	0.515212	0.288736	2.09539	8.71e-10	0.513244	0.154035	2.09342	8.1e-10	unbiased
AARA000646	297	221	258	667	975	850	1277	1538	607	624	246	577	0.732704	0.00480041	-0.366005	0.115018	0.225262	0.345474	-0.873448	9.22e-05	unbiased
AARA000647	1089	955	1105	814	1197	1119	2274	2386	1044	2319	2369	2286	-0.530859	0.0419381	1.6759	4.13e-16	-1.39088	1.69e-11	0.815886	0.000107379	Ma_RT_weak
AARA000648	1710	1378	1860	1218	1850	1793	1525	2071	856	474	395	563	-1.54021	2.42e-22	-1.26745	1.38e-15	0.560168	0.000615212	0.832931	9.73e-08	Fe_Car_weak
AARA000649	149	125	155	97	154	137	290	357	147	112	94	122	-0.504481	0.0171359	0.245037	0.222656	0.205101	0.291126	0.954618	1.5e-07	unbiased
AARA000650	24	23	26	25	62	66	82	104	40	63	23	80	0.221791	0.752198	0.573646	0.14409	-0.570383	0.139444	-0.218528	0.615441	unbiased
AARA000651	4	7	4	6	1	7	45	39	11	6	4	6	1.18514	0.182146	0.588413	0.4641	1.43639	0.0324546	0.839668	0.283957	unbiased
AARA000652	38	27	32	81	99	99	113	88	54	77	83	75	0.0494853	0.939851	0.25531	0.447426	-0.929974	0.00310892	-0.724149	0.0312775	unbiased
AARA000653	241	216	246	484	787	626	879	1295	579	506	144	497	0.587968	0.139795	-0.325033	0.315886	0.299638	0.355613	-0.613364	0.0470359	unbiased
AARA000654	176	151	195	260	404	380	445	553	248	457	302	325	-0.12446	0.632585	0.531351	0.000469181	-0.844433	1.3e-08	-0.188622	0.257592	unbiased
AARA000655	53	55	70	7	26	24	176	291	113	332	308	186	0.301435	0.609649	4.3816	2.2e-30	-1.6192	2.52e-06	2.46096	6.94e-10	Ma_RT_strong
AARA000656	43	51	46	4	18	17	122	180	106	220	93	178	0.208668	0.703755	4.07637	4.9e-29	-1.20809	4.9e-05	2.65962	3.18e-12	Ma_RT_strong
AARA000657	114	121	111	341	431	454	378	318	136	583	750	474	-0.137339	0.831833	1.10356	0.00118167	-2.25419	1.36e-11	-1.01328	0.00344086	Ma_RT_weak
AARA000658	43	49	57	200	309	344	190	160	59	124	151	107	0.0405244	0.955042	-0.600644	0.0869662	-1.04631	0.00244624	-1.68748	1.05e-06	unbiased
AARA000659	11	14	13	81	140	141	51	66	22	31	26	39	0.448391	0.397117	-1.41695	4.94e-07	-0.546691	0.0829415	-2.41203	4.23e-13	Fe_RT_weak
AARA000660	55	13	36	3437	5056	5237	21	13	0	289	210	238	-3.00702	3.53e-07	-3.68427	1.97e-15	-5.48363	1.84e-25	-6.16087	2.54e-38	Fe_RT_strong
AARA000661	102	67	93	127	172	192	280	322	102	131	62	137	-0.00690936	0.989898	-0.134793	0.650683	0.0252539	0.937043	-0.10263	0.733683	unbiased
AARA000662	0	1	1	3	5	5	11	6	2	8	3	3	1.62723	NA	0.526542	0.567481	-0.565045	0.527283	-1.66574	0.159708	unbiased
AARA000663	56	53	65	190	298	259	197	171	66	62	22	46	-0.0863284	0.867874	-2.07872	4.92e-14	0.70691	0.0156955	-1.28548	1.8e-06	Fe_RT_weak
AARA000664	2	3	2	1	0	1	1	2	1	0	1	0	-2.0134	NA	-0.339449	0.862061	0.656303	0.700279	2.33025	0.0864477	not_expressed
AARA000665	417	343	411	915	1347	1103	1089	2205	818	281	64	299	0.39799	0.48606	-1.99145	6.16e-08	1.67695	5.98e-06	-0.712491	0.0597356	unbiased
AARA000666	22	18	27	57	121	90	81	60	31	75	76	45	-0.00511519	0.995937	0.0998701	0.825192	-1.26426	0.000921413	-1.15928	0.00394609	unbiased
AARA000667	1827	1555	2060	1322	1977	1689	2436	5405	2160	652	324	420	-0.510714	0.0749582	-1.38996	7.18e-10	1.80596	6.47e-16	0.926707	3.65e-05	unbiased
AARA000668	37	52	47	125	219	228	192	149	69	197	127	137	0.201033	0.697423	0.177211	0.561139	-1.21029	1.38e-05	-1.23411	2.59e-05	unbiased
AARA000669	1062	838	1016	272	418	344	2336	3579	1594	1211	806	1125	-0.0124266	0.966394	2.07283	3.57e-49	0.216517	0.137429	2.30177	2.28e-60	unbiased
AARA000670	29	134	147	62	97	7	670	944	556	229	571	1	1.32967	0.517981	2.6044	0.0549519	0.195714	0.900905	1.47045	0.288999	unbiased
AARA000671	24	24	35	84	144	160	26	26	11	30	64	34	-1.75627	0.00124928	-0.976936	0.0290224	-2.16907	3.49e-06	-1.38973	0.00192944	unbiased
AARA000672	410	395	460	134	140	162	667	717	323	147	115	131	-0.948611	5.87e-07	0.312763	0.135853	1.05837	1.78e-08	2.31974	6.74e-37	unbiased
AARA000673	6	6	12	11	13	7	25	39	22	0	0	6	0.509906	0.614939	-1.82775	0.0274682	2.72914	0.000509875	0.391483	0.582371	unbiased
AARA000674	146	122	120	69	122	81	441	678	284	147	69	129	0.458271	0.0919145	0.790316	0.000627977	0.996931	2.88e-06	1.32898	2.58e-09	unbiased
AARA000675	482	361	432	51	69	39	443	495	170	651	454	560	-1.62367	4.38e-12	3.83802	9.45e-56	-1.67807	6.34e-14	3.78362	6.16e-54	Ma_RT_strong
AARA000676	1451	1390	1684	5775	8919	7735	3884	4889	2018	4786	2300	3394	-0.14067	0.485613	-0.655867	2.77e-07	-0.982498	8.92e-15	-1.4977	9.44e-33	unbiased
AARA000677	38	31	50	229	294	312	106	121	39	95	76	91	-0.253629	0.538274	-1.1937	7.36e-08	-1.06972	6.86e-06	-2.00978	5.42e-17	Fe_RT_weak
AARA000678	31	23	12	19	20	22	53	131	62	9	10	24	0.515171	0.510041	-0.037452	0.950792	1.45608	0.00555055	0.903453	0.0950075	unbiased
AARA000679	5	2	0	92	146	99	14	11	5	15	18	12	0.645074	0.563994	-2.3757	1.39e-08	-1.64545	0.0010643	-4.66623	1.33e-13	Fe_RT_strong
AARA000680	167	73	108	50	92	76	275	576	306	89	52	138	0.40181	0.510451	0.815033	0.0509652	1.06935	0.00739991	1.48257	0.000208213	unbiased
AARA000681	62	51	48	219	329	336	182	218	79	125	54	106	0.155381	0.707765	-1.18737	4.34e-08	-0.292021	0.222878	-1.63477	5.77e-13	Fe_RT_weak
AARA000682	87	65	76	986	1659	1419	157	218	118	319	124	247	-0.236775	0.541653	-2.11944	5.25e-23	-1.4426	2.07e-10	-3.32527	8.21e-49	Fe_RT_weak
AARA000683	56	50	66	112	158	170	240	219	109	146	140	132	0.354456	0.354431	0.433496	0.0957021	-0.625778	0.0130465	-0.546738	0.0425665	unbiased
AARA000684	0	0	0	0	0	0	0	0	0	0	0	0	NA	NA	NA	NA	NA	NA	NA	NA	not_expressed
AARA000685	9	16	8	48	60	47	20	16	7	103	132	48	-1.0045	0.209531	1.40311	0.00549243	-3.80595	4.22e-13	-1.39833	0.0120825	Ma_RT_weak
AARA000686	80	91	93	322	450	438	164	190	94	153	191	120	-0.602723	0.141032	-0.831585	0.00607135	-1.15191	0.000156633	-1.38078	4.52e-06	unbiased
AARA000687	144	177	183	317	483	447	311	265	123	2035	853	1383	-0.910114	0.000903708	2.19618	2.07e-22	-3.59668	1.03e-56	-0.490388	0.0454326	Ma_RT_weak
AARA000688	39	26	41	93	163	145	45	32	7	92	58	60	-1.74794	2.18e-05	-0.44716	0.204077	-2.39652	2.68e-11	-1.09574	0.00162472	unbiased
AARA000689	5	4	2	8	13	7	16	21	15	2	0	4	0.901298	0.366593	-1.6975	0.0395109	2.08085	0.00850408	-0.51795	0.495556	unbiased
AARA000690	139	109	116	199	331	322	273	461	179	168	79	118	-0.0790372	0.837652	-0.766084	0.000216538	0.283925	0.193827	-0.403121	0.0555477	unbiased
AARA000691	120	118	135	151	261	208	447	612	318	497	209	312	0.531276	0.0454769	1.15053	2.86e-08	-0.533346	0.0106403	0.0859101	0.727723	Ma_RT_weak
AARA000692	91	167	162	226	326	310	267	273	151	245	102	259	-0.62978	0.111264	-0.0841101	0.817293	-0.769921	0.0123911	-0.22425	0.492031	unbiased
AARA000693	222	222	219	306	380	430	581	551	216	718	509	682	-0.387061	0.158671	1.23959	3.82e-10	-1.57448	1.04e-15	0.0521668	0.824216	Ma_RT_weak
AARA000694	2625	2454	2866	3170	4151	4417	5240	4265	1755	5384	8128	4899	-0.89523	0.0440661	1.21591	0.000761816	-1.87511	1.31e-07	0.236025	0.544831	Ma_RT_weak
AARA000695	57	28	64	2486	3430	3088	28	38	19	91	59	67	-2.16197	7.62e-13	-4.89932	8.12e-105	-2.37485	2.68e-17	-5.1122	4.84e-105	Fe_RT_strong
AARA000696	30	22	19	16	19	21	57	42	25	29	18	26	-0.551032	0.292963	0.830471	0.042212	-0.243357	0.552673	1.13815	0.00428534	unbiased
AARA000697	33	31	38	118	173	146	48	39	20	45	26	26	-1.29658	9.96e-05	-1.7056	3.92e-10	-0.880531	0.00447175	-1.28955	1.91e-06	Fe_RT_weak
AARA000698	0	3	0	0	0	0	6	9	3	1	0	4	1.03752	NA	3.38254	0.0634252	0.764347	0.603439	3.10937	0.0905822	not_expressed
AARA000699	243	230	266	388	545	476	567	841	397	408	195	330	-0.0808546	0.78421	-0.158343	0.36376	-0.0501731	0.785949	-0.127662	0.464724	unbiased
AARA000700	6	12	13	11	28	20	55	48	28	18	45	9	0.715992	0.482402	0.946921	0.163318	-0.309788	0.661958	-0.0788594	0.916984	unbiased
AARA000701	50	42	63	55	98	96	252	295	114	48	29	39	0.690798	0.0101437	-0.623667	0.0147923	1.44639	8.39e-10	0.131924	0.617573	unbiased
AARA000702	46	44	50	116	189	177	86	46	22	73	153	59	-1.23005	0.0628049	-0.120709	0.845994	-2.05888	6.78e-05	-0.949538	0.0722133	unbiased
AARA000703	34	47	44	86	125	124	133	127	64	120	177	123	0.00146774	0.998278	0.885216	0.0122771	-1.4865	1.78e-05	-0.602751	0.108747	unbiased
AARA000704	30	33	33	0	1	0	164	183	68	1	1	8	0.695829	0.145772	2.97223	0.0106147	4.24483	1.79e-14	6.52123	4.36e-10	unbiased
AARA000705	0	4	99	102	377	38	160	353	85	112	158	4	0.969101	0.697486	-0.19074	0.912891	-0.160445	0.927174	-1.32029	0.391984	unbiased
AARA000706	3	0	1	1	0	1	5	5	7	4	0	1	0.854953	NA	1.37846	0.354287	0.963864	0.452548	1.48737	0.313746	not_expressed
AARA000707	52	46	59	2	4	0	157	247	84	14	3	10	0.214983	0.651554	2.46785	0.000318545	3.09738	3.61e-16	5.35025	2.8e-18	unbiased
AARA000708	1	0	3	0	0	0	13	7	2	1	1	0	1.03321	NA	2.38801	0.21237	2.14965	0.125655	3.50446	0.0500977	not_expressed
AARA000709	1	0	0	0	1	0	5	0	2	0	1	1	1.2818	NA	1.17728	0.555515	0.725464	0.700672	0.620941	0.771274	not_expressed
AARA000710	0	0	0	0	0	0	0	0	0	0	0	0	NA	NA	NA	NA	NA	NA	NA	NA	not_expressed
AARA000711	8	12	5	0	0	0	60	62	25	2	0	0	1.13991	0.119896	2.12775	0.221153	4.89202	1.41e-06	5.87985	5.33e-05	unbiased
AARA000712	11	6	5	0	0	0	41	59	23	1	0	0	1.08177	0.14631	1.49827	0.428601	5.35848	7.16e-06	5.77498	9.87e-05	unbiased
AARA000713	6	3	5	0	0	0	28	30	14	0	0	0	1.00532	0.28701	0.304716	0.901944	6.02381	0.000151335	5.3232	0.000732383	unbiased
AARA000714	7	8	8	0	0	0	18	27	14	0	0	1	0.0135689	0.990945	1.54016	0.422016	4.37891	0.000353728	5.9055	8.63e-05	unbiased
AARA000715	4	2	1	0	0	0	7	12	3	0	0	0	0.224247	NA	0.275136	0.911199	4.46117	0.0108365	4.51206	0.00935049	unbiased
AARA000716	10	6	4	0	0	1	21	44	10	1	0	0	0.424236	0.723723	0.373056	0.845186	4.53657	0.000249013	4.48539	0.00027614	unbiased
AARA000717	0	0	0	0	0	0	10	2	4	1	0	0	4.2213	NA	1.776	0.414909	2.83543	0.109442	0.390122	0.867389	not_expressed
AARA000718	0	1	0	0	0	0	30	29	16	0	0	0	4.67814	NA	0.272725	0.912049	6.46055	0.00016248	2.05514	0.307411	unbiased
AARA000719	478	381	461	205	282	286	1401	1467	640	194	98	132	0.0216254	0.949703	-0.418999	0.0290211	2.01444	9.65e-31	1.57382	3.42e-20	unbiased
AARA000720	294	239	313	370	591	467	814	1198	518	172	34	168	0.198246	0.758199	-1.53988	2.15e-05	1.7916	6.36e-07	0.053469	0.893237	unbiased
AARA000721	0	0	2	13	17	2	0	3	0	85	85	105	-0.855535	0.694894	3.50857	6.85e-08	-7.27311	8.02e-15	-2.90901	0.00736817	Ma_RT_specific
AARA000722	59	45	50	1	0	3	209	1599	1024	13	6	12	2.88273	3.3e-05	3.05174	0.000915105	5.48892	1.28e-16	5.65792	6.48e-11	Ma_Car_specific
AARA000723	232	221	260	198	270	318	362	376	161	169	213	99	-1.04997	0.0124582	-0.142887	0.728236	-0.244566	0.535675	0.662513	0.0683523	unbiased
AARA000724	184	150	209	238	314	273	334	430	192	132	37	130	-0.557098	0.133877	-1.06708	0.000247342	0.696578	0.018684	0.186595	0.544321	unbiased
AARA000725	107	92	123	294	452	302	316	445	156	95	28	74	0.0908998	0.852921	-1.99269	5.75e-14	1.18548	1.23e-05	-0.898112	0.000573516	Fe_RT_weak
AARA000726	0	0	0	0	0	0	2	1	0	1	1	0	1.85722	NA	2.63497	NA	-0.426719	NA	0.351027	NA	not_expressed
AARA000727	12	8	11	1	1	0	38	47	15	7	1	3	0.269937	0.768929	2.52386	0.0178234	2.10272	0.000745042	4.35665	7.55e-06	unbiased
AARA000728	73	47	47	2	9	3	97	315	136	26	12	56	0.33165	0.724807	3.10944	2.21e-06	1.52063	0.00591934	4.29841	1.77e-11	unbiased
AARA000729	144	124	146	13	34	15	358	893	425	79	61	146	0.659262	0.221806	2.66971	5.65e-10	1.52238	0.000121002	3.53284	6.46e-17	unbiased
AARA000730	296	242	235	23	53	33	999	2371	1112	137	64	346	1.15744	0.0553197	2.73804	3.8e-08	2.0327	2.57e-05	3.61331	1.77e-13	unbiased
AARA000731	230	232	254	921	1415	1303	518	580	264	439	161	371	-0.453117	0.10424	-1.48227	8.21e-13	-0.498029	0.0230712	-1.52718	1.98e-13	Fe_RT_weak
AARA000732	758	2909	2844	365	539	413	3369	7212	3349	265	1622	132	-0.256709	0.863337	1.33123	0.113931	1.40207	0.0937559	2.99	0.000188493	unbiased
AARA000733	0	0	1	0	0	0	2	0	0	1	0	0	-0.159958	NA	1.35476	NA	0.0873004	NA	1.60202	NA	not_expressed
AARA000734	12	7	13	17	13	19	48	65	21	13	0	8	0.636188	0.404854	-0.845515	0.161816	1.63141	0.00338603	0.14971	0.807506	not_expressed
AARA000735	118	132	140	222	313	299	343	436	176	95	60	89	-0.106481	0.695586	-1.30832	2.65e-15	0.913223	4.58e-08	-0.288611	0.0753255	unbiased
AARA000736	192	138	176	19	36	35	433	550	234	74	86	89	-0.12167	0.785372	1.98376	9.13e-12	1.18734	2.46e-06	3.29277	3.72e-32	unbiased
AARA000737	304	226	285	151	194	204	811	881	311	202	256	199	-0.125552	0.816579	0.793431	0.00887711	0.441867	0.151186	1.36085	3.47e-06	unbiased
AARA000738	8	7	2	0	3	1	14	26	10	3	1	0	0.13879	0.922921	0.443872	0.733956	2.46714	0.010175	2.77222	0.00476345	not_expressed
AARA000739	1398	1066	1372	492	787	653	883	1122	450	234	179	195	-2.03912	1.18e-44	-1.17761	5.21e-14	0.93679	2.57e-09	1.7983	1.17e-35	Fe_Car_weak
AARA000740	0	0	0	0	0	0	0	0	1	0	0	0	1.07999	NA	0.158724	NA	1.18701	NA	0.265748	NA	not_expressed
AARA000741	0	0	0	0	0	0	0	0	0	1	0	0	-0.423749	NA	1.46451	NA	-1.62251	NA	0.265748	NA	not_expressed
AARA000742	94	93	115	7	4	3	483	459	217	0	9	0	0.559296	0.457061	-0.0522031	0.950726	5.67647	9.85e-19	5.06497	3.22e-17	unbiased
AARA000743	0	1	0	0	0	0	7	2	0	0	5	0	1.17994	NA	3.36944	0.0995958	-0.500098	0.813383	1.6894	0.433871	not_expressed
AARA000744	53	30	41	1	0	2	148	341	156	17	9	17	1.01046	0.0262678	3.93277	2.04e-06	2.87182	2.71e-12	5.79414	3.17e-13	Ma_Car_weak
AARA000745	31	26	32	2	0	0	116	335	138	27	10	25	1.33284	0.00598603	4.82293	1.18e-07	2.22112	2.02e-07	5.71122	1.82e-10	Ma_Car_weak
AARA000746	68	80	89	8	35	47	234	367	163	385	286	440	0.307688	0.558556	4.1255	5e-34	-1.58031	4.73e-07	2.23751	2.48e-10	Ma_RT_strong
AARA000747	52	50	65	132	197	164	237	310	120	99	53	67	0.595505	0.0130241	-0.713276	0.000305028	0.554636	0.00481193	-0.754145	0.000209176	unbiased
AARA000748	28	31	25	49	84	72	149	72	32	62	39	40	0.181314	0.819565	-0.0586843	0.909214	-0.212918	0.650887	-0.452917	0.322679	unbiased
AARA000749	23	19	20	247	348	351	88	96	25	65	21	30	0.297605	0.61843	-2.59675	3.89e-16	-0.207897	0.585802	-3.10225	6.37e-20	Fe_RT_strong
AARA000750	46	35	35	54	98	89	97	158	56	55	6	41	-0.00165266	0.998278	-0.84726	0.0605896	0.624031	0.172829	-0.221577	0.642035	unbiased
AARA000751	39	43	47	47	79	74	154	192	70	91	31	46	0.27408	0.54286	0.17934	0.572845	0.280124	0.349279	0.185384	0.561664	unbiased
AARA000752	91	71	87	362	594	515	273	297	142	240	99	150	0.142001	0.708952	-1.14698	1.1e-08	-0.452662	0.0342533	-1.74164	5.5e-17	Fe_RT_weak
AARA000753	171	187	202	158	195	203	891	887	414	464	236	354	0.587695	0.00564569	1.35503	9.63e-14	0.0404032	0.846958	0.807736	1.92e-05	unbiased
AARA000754	121	123	109	104	119	108	645	771	312	551	175	345	0.879462	0.0053554	2.06174	1.54e-14	-0.29978	0.289378	0.882499	0.00176402	unbiased
AARA000755	28	14	18	953	1535	1488	31	40	23	395	174	218	-0.710358	0.115834	-1.88834	7.1e-15	-4.02644	4.82e-46	-5.20442	2.91e-68	Fe_RT_weak
AARA000756	56	49	65	6	11	18	162	196	64	3	7	9	-0.113841	0.848854	-0.361241	0.517931	3.31565	5e-14	3.06825	3.71e-15	unbiased
AARA000757	6	8	4	0	4	3	166	159	68	198	151	128	3.01141	3.95e-10	6.43747	3.33e-27	-1.34928	2.06e-05	2.07677	0.00307759	Ma_RT_specific
AARA000758	27	16	16	2	10	5	24	38	14	11	19	8	-1.03197	0.135554	1.70838	0.00712936	-0.154376	0.807191	2.58598	1.88e-05	unbiased
AARA000759	560	485	590	18	34	18	446	614	201	142	348	243	-1.79174	0.000126427	3.956	1.03e-18	-0.453662	0.322286	5.29407	5.64e-33	Fe_Car_weak
AARA000760	84	69	60	2	4	1	433	310	125	3	0	4	0.606273	0.274567	0.427458	0.649029	5.76205	1.99e-19	5.58323	2.02e-18	unbiased
AARA000761	2610	334	948	61879	102662	81478	870	978	401	1376	938	957	-2.14598	0.000291835	-5.6495	1e-27	-1.58391	0.00338173	-5.08743	8.01e-23	Fe_RT_strong
AARA000762	25	18	24	24	21	26	150	106	65	14	4	15	0.912956	0.0649198	-0.685999	0.158376	2.28616	1.13e-07	0.68721	0.114104	unbiased
AARA000763	2	1	2	0	1	6	4	4	2	0	1	0	-0.319507	NA	-1.7588	0.258285	1.7659	0.24879	0.326599	0.814842	not_expressed
AARA000764	1	0	0	2	5	5	0	2	0	0	0	0	-0.45149	NA	-4.20157	0.02417	1.29702	0.538312	-2.45306	0.141364	not_expressed
AARA000765	3	8	6	4	9	5	4	11	7	6	1	1	-0.933941	0.400265	-0.702038	0.444381	0.493999	0.5962	0.725903	0.370284	unbiased
AARA000766	0	0	0	0	0	0	0	0	0	0	0	0	NA	NA	NA	NA	NA	NA	NA	NA	not_expressed
AARA000767	0	0	0	0	0	0	0	0	0	1	0	0	-0.423749	NA	1.46451	NA	-1.62251	NA	0.265748	NA	not_expressed
AARA000768	1	6	9	3	2	1	8	13	2	3	1	6	-0.914774	NA	1.05297	0.325645	0.0746674	0.945445	2.04241	0.0360345	not_expressed
AARA000769	27	25	33	65	94	88	109	114	47	73	27	55	0.273451	0.547314	-0.239013	0.408556	-0.217419	0.452603	-0.729882	0.0114294	unbiased
AARA000770	100	91	104	37	19	32	261	354	164	33	29	40	0.0273034	0.965069	0.641056	0.0745134	1.87232	1.28e-09	2.48607	3.44e-15	unbiased
AARA000771	0	1	1	0	0	0	8	6	4	8	1	3	1.70772	NA	4.62336	0.00513836	-0.293719	0.790742	2.62192	0.149584	not_expressed
AARA000772	12	13	11	0	0	0	93	90	26	5	4	5	1.08705	0.0676554	4.49307	0.00155133	2.76433	7.11e-07	6.17035	6.17e-06	unbiased
AARA000773	83	88	91	327	472	415	229	404	168	372	186	289	0.217658	0.472886	-0.0769078	0.705746	-1.10646	6.2e-10	-1.40102	1.36e-13	unbiased
AARA000774	1	1	0	0	0	0	0	0	1	0	3	0	-1.32141	NA	2.94485	0.162153	-1.74828	0.400941	2.51798	0.233944	not_expressed
AARA000775	1	0	2	1	0	0	8	2	1	2	5	1	0.47238	NA	2.88038	0.0583324	-0.655416	0.627551	1.75259	0.286717	not_expressed
AARA000776	22	13	14	0	0	0	47	96	36	1	0	1	0.463616	0.52402	2.08742	0.221441	5.13627	1.42e-07	6.76007	1.46e-06	unbiased
AARA000777	12	7	12	39	64	41	18	45	10	65	25	51	-0.222027	0.791087	0.395502	0.319253	-2.01096	2.37e-07	-1.39343	0.00142995	unbiased
AARA000778	222	223	246	247	352	300	585	601	268	400	468	324	-0.312507	0.470563	0.943965	0.000846001	-0.833308	0.00315609	0.423164	0.149894	unbiased
AARA000779	184	157	202	382	634	439	411	846	292	943	145	692	0.0882941	0.916052	0.635619	0.158985	-1.15228	0.00810358	-0.604956	0.177899	unbiased
AARA000780	345	351	414	711	1009	935	996	1150	474	700	385	581	-0.156511	0.418638	-0.221776	0.0922465	-0.387736	0.00243153	-0.453001	0.00042057	unbiased
AARA000781	0	0	0	0	0	0	0	0	0	0	0	0	NA	NA	NA	NA	NA	NA	NA	NA	not_expressed
AARA000782	62	18	37	1	6	4	41	43	15	3	1	11	-1.62078	0.0245652	0.886747	0.299187	1.61584	0.0219093	4.12337	4.72e-09	Fe_Car_weak
AARA000783	1	0	1	5	9	12	4	2	3	0	1	0	0.782957	NA	-3.66421	0.00568108	1.75146	0.220335	-2.69571	0.0232527	unbiased
AARA000784	1	3	0	2	0	1	5	4	0	2	0	0	-0.348398	NA	-0.281716	0.890716	0.891211	0.610439	0.957892	0.568615	not_expressed
AARA000785	0	1	0	0	0	0	16	5	9	53	20	33	3.15679	0.0425131	7.56594	2.7e-07	-2.63246	4.91e-05	1.77668	0.338616	Ma_RT_specific
AARA000786	26	25	32	115	199	254	26	18	11	54	81	50	-1.91918	0.000149465	-1.02312	0.0116983	-2.82403	8.81e-11	-1.92798	2.8e-06	Fe_RT_weak
AARA000787	69	73	83	247	385	346	235	232	88	339	351	225	-0.108869	0.85293	0.441747	0.160047	-1.84938	5.23e-10	-1.29877	2.5e-05	unbiased
AARA000788	228	219	252	442	724	728	737	596	271	696	455	584	-0.188711	0.596158	0.355789	0.111074	-1.15973	4.46e-08	-0.615234	0.00496882	unbiased
AARA000789	46	70	74	121	178	130	225	397	182	112	27	77	0.705096	0.116249	-0.601004	0.0973786	0.93801	0.00720973	-0.36809	0.319176	unbiased
AARA000790	84	90	102	260	354	283	353	579	258	761	244	825	0.726426	0.0762488	1.40966	5.65e-06	-1.58068	3.11e-07	-0.897447	0.00575762	Ma_RT_weak
AARA000791	198	218	267	259	398	314	439	628	256	518	144	638	-0.436866	0.411659	0.807533	0.0267382	-0.948054	0.00845436	0.296345	0.438898	unbiased
AARA000792	214	214	268	499	704	757	139	102	67	301	229	189	-2.49661	1.45e-19	-0.948952	0.000332181	-2.23259	1.07e-16	-0.684928	0.00994195	unbiased
AARA000793	636	628	745	1253	2130	1932	2292	2407	947	1157	554	658	0.0837212	0.823641	-0.710703	0.000471856	0.21352	0.325902	-0.580903	0.00428852	unbiased
AARA000794	27	36	23	25	42	40	72	85	32	64	17	65	-0.283477	0.667913	0.855928	0.0326789	-0.627238	0.112892	0.512167	0.222887	unbiased
AARA000795	1245	1091	1334	436	685	572	1232	1528	693	1043	788	983	-1.46449	3.69e-34	1.21939	1.88e-23	-0.759004	3.88e-10	1.92488	1.12e-57	Fe_Car_weak
AARA000796	0	1	2	0	0	0	1	1	1	3	0	4	-1.10333	NA	3.98005	0.0286373	-1.86819	0.206095	3.2152	0.085389	not_expressed
AARA000797	11	27	28	42	60	35	15	28	14	2	7	5	-1.55469	0.0089025	-2.71533	2.99e-06	0.905117	0.155297	-0.255524	0.63074	unbiased
AARA000798	26	33	36	23	41	25	25	28	18	6	10	4	-1.74853	4.92e-05	-1.61438	0.000881001	0.768187	0.133587	0.902334	0.0210374	unbiased
AARA000799	4	5	6	6	8	8	4	0	4	0	0	0	-1.99036	NA	-4.62925	0.00357698	2.86854	0.0836216	0.229647	0.812127	unbiased
AARA000800	0	0	0	0	1	0	0	0	0	0	0	1	-0.35368	NA	0.28583	NA	-1.49583	NA	-0.856321	NA	not_expressed
AARA000801	171	156	170	423	620	648	641	745	282	184	77	120	0.333475	0.203732	-1.70811	4.52e-19	1.09042	2.11e-08	-0.951162	5.12e-07	Fe_RT_weak
AARA000802	438	462	466	1051	1569	1510	1229	1683	791	829	504	789	0.0641165	0.781813	-0.496583	6.18e-05	-0.219935	0.0890845	-0.780634	2.75e-10	unbiased
AARA000803	115	104	138	94	257	260	462	514	195	95	28	86	0.303388	0.583842	-1.08174	0.00238466	1.46563	2.65e-05	0.0805008	0.836516	unbiased
AARA000804	41	36	56	41	89	104	199	219	79	61	32	45	0.489953	0.232847	-0.277035	0.405516	0.783744	0.0094488	0.0167552	0.961014	unbiased
AARA000805	3	1	2	144	224	214	2	2	0	49	50	48	-1.8237	0.126081	-1.47104	5.16e-07	-6.02648	1.99e-17	-5.67382	5.24e-20	Fe_RT_weak
AARA000806	123	101	129	236	382	334	360	543	252	195	72	194	0.340141	0.341454	-0.616145	0.0136871	0.341	0.186259	-0.615286	0.0138088	unbiased
AARA000807	56	66	85	25	37	30	261	314	128	120	30	156	0.36635	0.567478	2.1024	4.21e-07	0.214132	0.628945	1.95019	3.08e-06	unbiased
AARA000808	1	1	2	0	0	2	4	9	3	14	3	4	0.549277	NA	3.44147	0.00308272	-1.33531	0.136592	1.55688	0.246738	unbiased
AARA000809	0	0	2	0	2	0	1	0	1	0	0	0	-0.691723	NA	-1.64172	NA	1.55354	NA	0.603541	NA	not_expressed
AARA000810	493	354	443	2791	4433	3518	1260	2139	829	856	357	555	0.308765	0.295814	-2.16922	2e-27	0.236736	0.285227	-2.24125	4.7e-29	Fe_RT_weak
AARA000811	3	4	1	1	3	1	4	14	10	6	0	5	0.48813	NA	1.41141	0.209213	0.484661	0.639974	1.40794	0.212012	unbiased
AARA000812	8	7	9	5	5	1	11	29	11	14	13	12	-0.309044	0.757879	2.23558	0.000551236	-0.691614	0.213308	1.85301	0.00592812	unbiased
AARA000813	73	59	72	33	42	34	121	317	108	182	108	157	-0.00436094	0.99492	2.47057	1.21e-16	-0.784874	0.00529665	1.69005	4.91e-08	Ma_RT_strong
AARA000814	548	472	466	247	371	393	1476	1722	713	188	139	151	-0.00569782	0.986704	-0.593595	0.00117874	1.96012	2.34e-30	1.37222	2.44e-16	unbiased
AARA000815	246	189	243	180	217	244	646	728	313	224	270	212	-0.0726067	0.88959	0.665264	0.0174805	0.13258	0.662635	0.870451	0.00150586	unbiased
AARA000816	108	103	101	142	184	166	359	379	180	113	144	135	0.17732	0.707599	0.193392	0.516638	0.127484	0.673347	0.143555	0.636864	unbiased
AARA000817	45	36	43	72	158	140	126	149	50	81	95	64	-0.0360904	0.959724	-0.0561691	0.893132	-0.711735	0.0364028	-0.731814	0.0356358	unbiased
AARA000818	22	27	29	119	159	178	85	85	28	118	123	69	-0.08336	0.912003	-0.0262469	0.946702	-1.78362	6.07e-07	-1.7265	4.04e-06	unbiased
AARA000819	6	0	4	91	175	168	9	3	2	219	188	167	-0.875443	0.382015	0.927353	0.00727308	-6.32557	1.3e-37	-4.52277	1.94e-16	unbiased
AARA000820	87	90	105	266	368	347	360	362	152	531	288	318	0.236614	0.47931	0.660519	0.00111389	-1.41643	9.56e-13	-0.992521	3.13e-06	unbiased
AARA000821	97	80	84	174	240	269	738	896	406	235	307	268	1.57647	1.38e-07	0.788172	0.00512566	0.214964	0.473758	-0.573332	0.051178	unbiased
AARA000822	8	0	2	215	294	295	1	3	0	233	152	174	-2.48902	0.0107681	-0.0575525	0.838324	-7.88574	1.61e-31	-5.45427	2.48e-28	unbiased
AARA000823	102	95	107	134	194	210	239	281	106	115	117	63	-0.368112	0.432547	-0.333024	0.320201	-0.0462408	0.901232	-0.0111532	0.974787	unbiased
AARA000824	64	47	71	8	10	7	123	192	84	107	45	62	-0.24415	0.576835	3.48705	7.36e-20	-0.110788	0.716433	3.62041	3.02e-21	unbiased
AARA000825	28	21	43	3	2	0	158	148	63	12	1	8	0.621734	0.29433	2.29558	0.00377214	3.09798	6.21e-10	4.77182	2.2e-11	unbiased
AARA000826	117	53	90	4	1	2	311	290	134	42	39	23	0.124746	0.863337	4.194	6.51e-11	1.72199	2.17e-05	5.79125	1.96e-20	unbiased
AARA000827	2	2	9	0	0	0	32	48	21	1	1	2	1.58988	0.0718857	3.01856	0.0659812	3.50168	8.39e-05	4.93035	0.00109016	unbiased
AARA000828	144	117	153	7	9	7	433	409	203	29	37	35	-0.0293075	0.957028	2.5975	4.73e-10	2.289	2.39e-15	4.9158	1.96e-36	unbiased
AARA000829	202	191	196	117	209	204	579	780	341	511	264	408	0.141047	0.580559	1.61732	5.71e-25	-0.500457	0.00106993	0.975814	2.65e-09	Ma_RT_weak
AARA000830	51	24	52	1595	2522	2352	113	88	42	311	352	216	-0.428469	0.47931	-2.30721	6.51e-11	-2.94887	5.64e-16	-4.8276	1.34e-39	Fe_RT_strong
AARA000831	27	33	49	40	56	50	125	91	44	99	70	65	-0.116504	0.853239	1.15007	0.000535704	-0.893704	0.00598679	0.37287	0.310328	Ma_RT_weak
AARA000832	41	38	54	241	386	390	60	35	21	105	78	60	-1.5376	8.22e-05	-1.55732	7.79e-07	-2.08925	8.48e-10	-2.10897	6.48e-11	Fe_RT_weak
AARA000833	22	15	30	163	259	219	22	89	37	57	4	66	-0.219669	0.854504	-1.9374	0.00216211	-0.684723	0.314935	-2.40246	0.000143638	Fe_RT_weak
AARA000834	223	219	231	201	287	287	527	659	295	160	121	153	-0.246327	0.199446	-0.359614	0.0212079	0.719226	9.61e-07	0.605939	2.73e-05	unbiased
AARA000835	10	8	5	2	0	39	33	44	21	9	4	4	0.667692	0.697486	-0.72541	0.517678	1.43373	0.1786	0.0406288	0.971751	unbiased
AARA000836	6172	4305	5929	2267	3428	3012	4383	25310	12453	1501	666	1699	0.0358659	0.972189	-0.733608	0.147879	2.46545	2.47e-07	1.69597	0.000415698	unbiased
AARA000837	70	57	64	6	12	1	178	205	89	115	31	75	-0.0829579	0.907425	3.86715	6.86e-16	0.119876	0.775087	4.06998	1.58e-17	unbiased
AARA000838	291	323	375	551	655	689	345	318	129	314	160	221	-1.71582	3.2e-15	-1.01458	1.6e-06	-0.848242	9.88e-05	-0.146998	0.518037	Fe_Ubi_weak
AARA000839	141	148	126	16	29	23	431	646	241	500	346	281	0.245541	0.542271	4.5155	1.49e-53	-0.858999	0.000534807	3.41096	4.92e-30	Ma_RT_specific
AARA000840	2	0	3	29	57	48	2	6	2	2	0	2	-0.400389	0.80708	-4.45858	3.52e-08	0.21838	0.841278	-3.83981	4.14e-07	Fe_RT_specific
AARA000841	4	1	4	114	208	177	7	9	6	79	42	76	-0.117891	0.921235	-0.870904	0.000969388	-4.13681	8.13e-26	-4.88982	7.53e-21	unbiased
AARA000842	761	662	756	1140	1918	1527	2450	3039	1373	921	391	932	0.274359	0.363369	-0.595133	0.00451762	0.615767	0.00313974	-0.253726	0.241744	unbiased
AARA000843	77	86	127	308	436	354	147	370	153	48	31	55	-0.170053	0.756041	-2.56193	1.02e-16	1.26937	6.78e-05	-1.12251	0.000178596	Fe_RT_strong
AARA000844	472	560	571	1595	2198	2267	1460	1778	873	1917	1506	1588	-0.00854964	0.981027	0.216229	0.216112	-1.33252	1.57e-16	-1.10775	1.39e-11	unbiased
AARA000845	206	177	223	372	583	554	998	989	398	539	216	452	0.572951	0.0396912	0.105847	0.675043	-0.0343797	0.897083	-0.501483	0.0297775	unbiased
AARA000846	178	184	203	502	788	792	548	755	311	1618	1171	1043	0.117743	0.739178	1.37453	8.32e-14	-2.31775	8.66e-37	-1.06097	4.4e-08	Ma_RT_weak
AARA000847	109	71	71	3	9	4	467	435	188	37	21	20	0.71766	0.0694673	2.6926	4.84e-08	2.74338	3.18e-16	4.71832	2.74e-24	unbiased
AARA000848	0	0	0	0	0	0	0	0	0	0	0	0	NA	NA	NA	NA	NA	NA	NA	NA	not_expressed
AARA000849	0	0	0	0	0	0	0	0	0	0	0	0	NA	NA	NA	NA	NA	NA	NA	NA	not_expressed
AARA000850	191	167	215	189	281	252	386	474	189	186	48	116	-0.524454	0.134325	-0.648105	0.0208812	0.593959	0.0337046	0.470309	0.0879218	unbiased
AARA000851	53	36	48	57	81	73	113	142	67	51	13	34	-0.138957	0.787717	-0.685199	0.026791	0.72591	0.0161986	0.179669	0.567997	unbiased
AARA000852	33	33	25	8	15	6	89	162	87	6	2	18	0.540984	0.463468	0.284162	0.675498	2.68641	5.6e-07	2.42959	7.21e-06	unbiased
AARA000853	27	20	21	4	10	5	49	141	55	11	0	10	0.4437	0.589557	0.539423	0.451822	2.51437	1.21e-05	2.61009	1.1e-05	unbiased
AARA000854	6	8	10	0	5	0	10	25	11	1	1	1	-0.419964	0.735515	-0.149462	0.912747	2.69788	0.00671112	2.96838	0.00103954	unbiased
AARA000855	8	11	11	1	3	4	8	36	13	2	3	5	-0.476204	0.651537	0.788463	0.398115	1.36968	0.0685612	2.63434	0.000690375	unbiased
AARA000856	7	13	6	2	2	2	19	63	22	3	3	7	0.556388	0.570402	1.48456	0.0975772	1.86744	0.00605925	2.79561	0.000565105	unbiased
AARA000857	20	18	21	3	3	7	26	120	53	3	2	9	0.383526	0.707599	0.542944	0.52197	2.73678	4.94e-05	2.8962	2.87e-05	unbiased
AARA000858	867	919	1004	29	78	31	3538	3522	2708	128	91	215	0.529347	0.304722	2.13143	3.06e-08	3.53465	5.36e-23	5.13673	9.45e-44	unbiased
AARA000859	1	11	40	27	57	2	24	15	3	15	5	6	-1.61706	0.262351	-1.22711	0.267316	-0.357935	0.765845	0.0320115	0.978048	unbiased
AARA000860	7	5	9	0	2	5	49	58	22	29	21	21	1.20848	0.0368064	3.71551	5.34e-09	-0.207238	0.631615	2.29979	0.00099807	Ma_Ubi_weak
AARA000861	18	9	15	3	4	6	68	73	33	73	102	26	0.661755	0.457557	4.41675	1.13e-11	-1.34965	0.0155653	2.40535	0.000497414	Ma_RT_specific
AARA000862	144	116	177	213	266	308	268	220	81	338	513	369	-1.02115	0.024136	1.18685	0.00134899	-2.26523	4.71e-10	-0.0572302	0.890068	Ma_RT_weak
AARA000863	58	58	69	118	202	187	127	107	53	105	131	73	-0.732611	0.118274	-0.146724	0.712374	-1.21438	0.000614485	-0.628488	0.0841649	unbiased
AARA000864	62	70	71	214	303	330	192	195	95	255	149	157	-0.127799	0.756264	-0.131118	0.566738	-1.24183	3.25e-09	-1.24515	1.38e-08	unbiased
AARA000865	45	34	36	114	186	201	138	120	65	131	113	92	0.126652	0.823641	-0.0607455	0.859989	-1.10498	0.00010324	-1.29237	1.5e-05	unbiased
AARA000866	167	164	158	241	290	326	630	565	268	601	323	445	0.197277	0.556612	1.11147	3.83e-08	-0.922355	4.58e-06	-0.00816377	0.973069	Ma_RT_weak
AARA000867	69	77	102	203	322	361	95	84	26	121	118	106	-1.68717	6.36e-07	-0.830782	0.00630677	-1.8723	1.7e-09	-1.01592	0.00081146	unbiased
AARA000868	24	16	22	62	96	134	46	60	28	491	524	364	-0.263557	0.697318	2.77557	7.57e-18	-4.43982	2.09e-40	-1.40069	0.000207728	Ma_RT_strong
AARA000869	5839	5560	5959	1008	1531	1174	10747	13611	5490	2409	1427	1888	-0.620861	2.21e-07	1.08268	2.05e-21	1.32872	5.06e-33	3.03226	6.5e-165	unbiased
AARA000870	0	0	1	0	0	0	10	6	1	252	311	144	2.12315	0.215624	10.285	2.79e-13	-6.45244	3.4e-24	1.7094	0.346249	Ma_RT_specific
AARA000871	3	3	1	2	0	0	6	3	0	64	20	44	-1.02573	0.44981	5.96745	2.04e-09	-4.7293	4.45e-11	2.26388	0.0487776	Ma_RT_specific
AARA000872	35	36	37	1	4	2	253	295	113	30	15	27	1.20288	3.06e-05	3.68158	4.68e-10	2.13871	1.99e-14	4.61742	1.09e-15	Ma_Car_weak
AARA000873	401	347	400	377	560	521	955	1135	465	505	419	348	-0.243912	0.414581	0.306288	0.147039	-0.0859191	0.703635	0.464281	0.0230701	unbiased
AARA000874	96	97	98	212	326	324	323	268	127	165	123	196	-0.0800441	0.859503	-0.348695	0.159507	-0.477507	0.0507209	-0.746158	0.00205053	unbiased
AARA000875	14207	10691	13633	1608	2387	1927	43838	80436	31809	5817	2841	4214	0.620155	0.00356919	1.55327	1.22e-17	2.56513	8.21e-47	3.49825	1.61e-85	unbiased
AARA000876	1	5	5	1	0	1	0	0	1	0	0	0	-4.02718	NA	-1.91886	0.344573	0.827096	0.70298	2.93541	0.0415914	unbiased
AARA000877	16	13	27	13	12	8	4	1	6	1	0	1	-3.42449	1.18e-05	-3.28106	0.00213672	1.3363	0.25532	1.47972	0.02452	Fe_Car_specific
AARA000878	1	0	1	7	2	1	3	0	1	7	4	14	-0.304374	NA	1.54623	0.147618	-3.29758	0.003408	-1.44698	0.285815	unbiased
AARA000879	2990	1962	2440	76	75	55	5813	13530	6428	304	372	1442	0.441785	0.615334	3.71962	3.37e-12	2.53984	1.82e-06	5.81768	2.25e-28	unbiased
AARA000880	46	51	63	0	0	0	5	9	14	10	7	5	-3.66062	2.42e-10	5.10556	0.000283726	-0.507909	0.463133	8.25828	9.66e-10	Fe_Car_specific
AARA000881	48	55	68	95	129	134	78	52	31	63	154	46	-1.40845	0.0338226	0.197315	0.748996	-1.86625	0.000538483	-0.260487	0.66104	unbiased
AARA000882	545	507	590	633	1049	985	1496	1653	714	616	267	434	-0.155394	0.570378	-0.57455	0.000925909	0.539295	0.00183036	0.120139	0.515353	unbiased
AARA000883	7	6	10	160	242	236	20	33	9	88	43	96	0.00164067	0.998278	-1.03915	5.86e-05	-2.91006	8.16e-21	-3.95084	1.77e-25	Fe_RT_weak
AARA000884	25	14	29	636	1086	935	92	138	59	330	78	367	0.699017	0.248422	-1.37028	0.000495705	-2.36147	2.36e-09	-4.43077	8.47e-27	Fe_RT_weak
AARA000885	6	7	7	0	0	0	13	45	22	0	1	4	0.646037	0.583402	3.27003	0.0424326	2.86946	0.0014705	5.49345	0.000226679	unbiased
AARA000886	15	13	10	4	2	2	22	83	40	2	2	8	0.565551	0.572839	0.953983	0.2935	2.51142	0.000412379	2.89985	0.000179729	unbiased
AARA000887	129	113	128	10	17	12	168	461	236	11	6	28	-0.108276	0.895676	0.649114	0.252567	3.24449	5.88e-12	4.00188	4.46e-17	unbiased
AARA000888	44	43	67	24	43	39	227	180	84	330	289	190	0.296086	0.60735	3.43512	7.17e-23	-1.79953	5.76e-08	1.33951	0.000340352	Ma_RT_strong
AARA000889	18	18	17	1	1	0	30	132	39	5	0	4	0.460812	0.626998	2.18732	0.0521051	3.33384	3.55e-06	5.06035	3.22e-07	not_expressed
AARA000890	178	280	504	59	96	15	760	1220	542	421	339	246	0.0334785	0.976132	2.99695	2.43e-08	0.247587	0.680801	3.21106	1.82e-09	unbiased
AARA000891	51	33	32	0	0	0	124	273	95	7	0	4	0.654804	0.240717	3.96874	0.00443452	4.38233	2.01e-14	7.69627	3.01e-09	unbiased
AARA000892	105	102	117	208	390	351	418	556	200	290	65	229	0.433877	0.384492	-0.299307	0.411653	0.0184681	0.963874	-0.714716	0.0381977	unbiased
AARA000893	199	244	264	1467	2000	1922	850	644	292	1067	651	691	-0.0542458	0.912665	-0.698619	0.00594661	-1.4744	3.06e-09	-2.11877	1.1e-17	unbiased
AARA000894	24	26	39	73	109	103	89	124	65	172	62	139	0.289011	0.553283	0.805397	0.0032923	-1.38555	2.67e-07	-0.869166	0.00440509	unbiased
AARA000895	7	53	60	1	0	0	5	10	2	3	4	1	-4.13912	3.09e-06	2.74799	0.0401641	-0.102214	0.929372	6.78489	1.72e-08	Fe_Car_specific
AARA000896	207	243	255	243	347	355	1306	1476	749	642	497	420	0.960458	3.88e-05	1.21509	8.94e-09	0.132766	0.570378	0.387402	0.0841697	unbiased
AARA000897	10	13	10	178	271	222	36	23	18	47	19	9	-0.107176	0.915378	-2.70143	2.06e-09	-0.889335	0.077209	-3.48359	5.04e-13	Fe_RT_strong
AARA000898	135	160	170	444	800	647	684	689	271	418	217	253	0.41181	0.16747	-0.623557	0.00473936	-0.158566	0.511127	-1.19393	4.97e-08	unbiased
AARA000899	196	237	248	217	342	232	891	982	395	637	204	623	0.328134	0.480524	1.28113	2.06e-05	-0.361855	0.256364	0.591142	0.0577116	unbiased
AARA000900	203	168	224	335	466	412	850	889	421	635	465	432	0.487795	0.0464234	0.816507	2.28e-05	-0.557018	0.00401205	-0.228307	0.277701	unbiased
AARA000901	19	10	17	32	57	49	70	76	47	76	52	57	0.722501	0.0946627	0.902233	0.00169899	-0.942321	0.000705876	-0.762589	0.0286578	unbiased
AARA000902	30	31	33	223	339	333	118	121	57	76	59	55	0.2728	0.493358	-1.74588	3.74e-16	-0.410681	0.0885548	-2.42936	1.73e-24	Fe_RT_weak
AARA000903	20	10	21	76	126	105	55	55	20	80	48	50	-0.0499536	0.941598	-0.314065	0.290142	-1.50484	3.05e-07	-1.76895	4.39e-08	unbiased
AARA000904	48	36	74	3	7	0	177	233	113	238	172	204	0.372034	0.361154	6.29686	1.65e-36	-1.26641	7.91e-07	4.65841	7.69e-20	Ma_RT_specific
AARA000905	178	697	879	43	26	2	663	854	515	127	337	23	-1.01828	0.562154	3.05068	0.00648074	0.786946	0.5159	4.85591	8.38e-06	unbiased
AARA000906	0	2	1	0	1	1	2	1	1	0	0	0	-0.765093	NA	-1.84536	0.371988	2.31596	0.240702	1.23569	0.470034	not_expressed
AARA000907	27	157	142	14	3	1	17	32	30	0	5	1	-3.09439	0.00376854	-0.98292	0.398963	2.42882	0.0223374	4.54029	1.68e-06	Fe_Car_strong
AARA000908	16	117	147	8	9	0	19	27	26	0	7	0	-2.79439	0.123484	-0.429415	0.80422	1.81185	0.232892	4.17683	0.00303062	unbiased
AARA000909	56	56	48	48	47	33	160	323	114	35	8	19	0.468361	0.371806	-0.669351	0.114608	2.22702	6.77e-09	1.08931	0.00377786	unbiased
AARA000910	24	30	35	89	175	105	76	102	42	19	6	18	-0.0871905	0.884638	-2.62331	1.62e-14	1.3135	0.000235977	-1.22261	5.91e-05	Fe_RT_specific
AARA000911	0	0	1	0	0	0	1	0	0	2	0	1	-0.857888	NA	2.8455	NA	-1.79107	NA	1.91233	NA	not_expressed
AARA000912	0	0	0	0	0	0	0	0	0	0	0	0	NA	NA	NA	NA	NA	NA	NA	NA	not_expressed
AARA000913	11	13	8	0	1	1	37	53	22	0	0	0	0.413118	0.614076	-1.40763	0.433253	6.33612	1.7e-05	4.51537	6.11e-06	not_expressed
AARA000914	30	17	19	0	1	0	97	142	51	1	0	1	0.719601	0.164417	1.03021	0.490081	5.77534	6.5e-10	6.08595	2.01e-08	unbiased
AARA000915	0	0	0	0	0	0	0	3	3	0	0	0	2.72726	NA	0.181489	NA	2.85452	NA	0.308752	NA	not_expressed
AARA000916	0	0	0	0	0	0	3	5	0	0	0	0	2.67225	NA	0.182396	NA	2.79918	NA	0.309328	NA	not_expressed
AARA000917	0	0	0	0	0	0	0	0	0	0	0	0	NA	NA	NA	NA	NA	NA	NA	NA	not_expressed
AARA000918	8	1	7	1	0	0	35	46	18	0	0	1	1.23871	0.185339	0.36456	0.848086	4.98847	4.57e-05	4.11432	0.00089958	not_expressed
AARA000919	0	0	0	0	0	1	2	0	0	0	0	0	1.13661	NA	-0.979982	NA	1.24245	NA	-0.874138	NA	not_expressed
AARA000920	1	2	1	0	1	1	2	3	2	0	0	1	-0.471312	NA	-0.330218	0.868695	1.47967	0.355151	1.62077	0.27446	not_expressed
AARA000921	3	2	9	4	3	3	25	31	10	28	22	23	0.815901	0.319526	3.26116	6.09e-08	-1.226	0.00723458	1.21926	0.0914297	Ma_RT_specific
AARA000922	61	59	61	102	135	122	142	126	60	78	84	47	-0.519652	0.26718	-0.258452	0.472046	-0.44655	0.203223	-0.185349	0.612061	unbiased
AARA000923	521	409	504	1001	1382	1355	836	729	291	1186	892	523	-1.02832	0.00609948	-0.0258362	0.943067	-1.57857	7.21e-07	-0.576087	0.0804071	unbiased
AARA000924	32	32	28	144	200	171	135	95	50	74	63	86	0.229534	0.671848	-0.723062	0.014372	-0.715863	0.0180889	-1.66846	5.87e-08	unbiased
AARA000925	10	11	15	0	0	0	43	53	25	80	30	88	0.377328	0.598001	8.05988	3.71e-10	-1.6887	6.71e-06	5.99386	4.54e-06	Ma_RT_specific
AARA000926	0	0	0	0	0	8	0	0	0	10	4	7	-0.756712	NA	1.71237	0.243286	-5.69653	0.001265	-3.22745	0.0892655	not_expressed
AARA000927	501	533	611	1650	2401	2347	874	795	371	1040	529	745	-1.06777	2.82e-08	-1.01974	9.85e-09	-1.19628	2.82e-11	-1.14825	1e-10	Fe_RT_weak
AARA000928	31	34	24	54	83	80	123	142	51	200	97	268	0.397937	0.440309	1.81146	4.07e-09	-1.87181	7.32e-10	-0.458286	0.202419	Ma_RT_weak
AARA000929	41	41	56	61	123	100	90	240	88	30	18	30	0.190724	0.743686	-1.36964	8.42e-05	1.34692	9.51e-05	-0.213439	0.550599	unbiased
AARA000930	0	2	1	0	0	0	2	0	2	0	1	0	-0.528275	NA	1.78261	0.41049	0.857822	0.670112	3.1687	0.112463	not_expressed
AARA000931	69	60	84	195	323	260	234	395	178	120	46	141	0.548834	0.151852	-0.905168	0.0015567	0.401523	0.179866	-1.05248	0.00024826	unbiased
AARA000932	3	2	3	3	6	8	6	11	3	1	0	5	-0.106157	NA	-0.982163	0.314813	0.621578	0.534122	-0.254428	0.797537	unbiased
AARA000933	20	12	24	62	80	93	39	51	26	53	83	36	-0.297411	0.720151	0.123473	0.812259	-1.68193	0.00015134	-1.26104	0.00662935	unbiased
AARA000934	0	0	0	0	0	0	0	0	0	21	37	23	-0.784774	0.837552	8.07459	2.48e-06	-8.41613	4.04e-07	0.443235	0.848966	Ma_RT_specific
AARA000935	555	544	579	396	605	590	2090	2734	1287	828	525	971	0.49137	0.0101174	1.0116	3.93e-10	0.371163	0.0243577	0.891394	4.21e-08	unbiased
AARA000936	20	11	12	0	0	0	41	47	24	1	0	0	0.0252874	0.980244	1.47143	0.431091	5.23277	8.24e-06	6.67891	3.49e-06	unbiased
AARA000937	16	8	14	8	4	8	29	57	15	5	2	4	-0.0357816	0.97318	-0.421702	0.57416	2.04867	0.000954488	1.66275	0.00369657	not_expressed
AARA000938	0	0	0	0	0	0	0	5	0	0	0	0	1.82075	NA	0.157058	NA	1.92777	NA	0.264082	NA	not_expressed
AARA000939	0	0	0	0	0	0	0	0	0	0	0	0	NA	NA	NA	NA	NA	NA	NA	NA	not_expressed
AARA000940	19	26	29	56	100	96	150	165	75	93	67	57	1.01032	0.00290691	0.278045	0.331348	-0.207062	0.467064	-0.939336	0.0018084	unbiased
AARA000941	4	6	4	32	66	66	16	14	13	187	108	127	0.25564	0.789821	1.83848	4.16e-10	-4.25048	6.72e-35	-2.66764	2.52e-08	Ma_RT_weak
AARA000942	8	0	4	4	14	8	30	28	15	30	10	21	1.21659	0.157638	1.65281	0.00491116	-0.699473	0.214368	-0.263256	0.734023	unbiased
AARA000943	25	35	43	12	31	17	117	112	67	121	62	89	0.182882	0.742502	2.63045	1.41e-15	-0.855439	0.00339906	1.59213	6.27e-06	Ma_RT_specific
AARA000944	101	101	127	131	204	190	296	321	145	311	121	361	-0.167246	0.737783	1.01507	0.000239083	-1.04596	0.000132243	0.136355	0.66455	Ma_RT_weak
AARA000945	64	73	64	150	201	193	256	270	104	3641	1823	5994	0.227988	0.704463	4.7921	3.28e-51	-5.18647	4.4e-60	-0.622364	0.08012	Ma_RT_strong
AARA000946	50	42	35	125	163	148	160	183	72	124	94	98	0.299951	0.418084	0.00835027	0.973775	-0.679823	0.0027497	-0.971424	6.84e-05	unbiased
AARA000947	170	135	125	714	1180	803	210	251	125	207	77	234	-0.918924	0.00908413	-1.94953	1.18e-11	-0.789686	0.00926062	-1.82029	2.53e-10	Fe_RT_weak
AARA000948	4365	4197	3416	4059	6740	4341	8541	8543	3512	1634	898	1561	-0.629519	0.0236154	-1.43004	2.91e-10	1.28482	1.7e-08	0.484302	0.0385327	unbiased
AARA000949	31	42	42	56	75	79	121	93	57	70	81	73	-0.108784	0.862469	0.60951	0.072135	-0.779407	0.018202	-0.0611129	0.873013	unbiased
AARA000950	925	789	783	861	1302	1232	3468	3668	1617	430	301	535	0.415836	0.0879586	-0.946988	8.5e-07	1.73628	2.51e-20	0.373454	0.0566417	unbiased
AARA000951	0	0	0	0	0	0	0	0	0	0	0	0	NA	NA	NA	NA	NA	NA	NA	NA	not_expressed
AARA000952	1	2	0	0	1	0	0	2	0	11	12	9	-1.7861	NA	4.94902	0.000163597	-4.79395	3.49e-05	1.94117	0.205862	not_expressed
AARA000953	0	0	1	0	0	0	1	0	0	1	4	1	-0.951172	NA	4.12562	0.0335795	-3.08995	0.080987	1.98684	0.349102	not_expressed
AARA000954	0	0	0	1	0	0	0	0	0	1	1	0	-0.492728	NA	0.917885	NA	-2.65095	NA	-1.24033	NA	not_expressed
AARA000955	160	162	198	334	427	421	261	311	159	322	265	278	-0.867566	1.61e-05	0.0321359	0.885791	-1.28765	4.21e-13	-0.387951	0.0363579	unbiased
AARA000956	271	198	249	242	290	331	737	1270	503	369	536	343	0.404848	0.416987	1.08455	0.00125956	-0.155096	0.677751	0.524602	0.130995	unbiased
AARA000957	0	0	0	0	0	0	0	0	0	0	0	0	NA	NA	NA	NA	NA	NA	NA	NA	not_expressed
AARA000958	1	0	1	1	0	0	0	0	9	2663	1886	1702	1.00905	0.723094	10.4948	3e-11	-8.54515	1.44e-08	0.940586	0.613116	Ma_RT_specific
AARA000959	145	155	185	739	1188	807	536	676	315	239	62	177	0.281606	0.545401	-2.11464	1.4e-13	0.717654	0.0165399	-1.67859	4.31e-09	Fe_RT_weak
AARA000960	5	5	1	1	0	1	6	12	2	1	3	1	-0.614834	NA	1.57388	0.240653	0.726928	0.518153	2.91564	0.0160808	not_expressed
AARA000961	1	0	1	0	0	1	2	1	1	1	4	2	-0.273938	NA	2.85118	0.0645405	-1.7381	0.193058	1.38702	0.424469	not_expressed
AARA000962	0	0	0	1	1	0	0	0	0	1	2	0	-0.59773	NA	0.922011	NA	-3.451	NA	-1.93126	NA	not_expressed
AARA000963	35	39	40	110	164	126	109	108	49	73	26	80	-0.162512	0.775385	-0.733702	0.0148288	-0.426676	0.178859	-0.997867	0.00109479	unbiased
AARA000964	7	7	8	12	5	5	18	18	7	17	12	3	-0.422982	0.724268	0.913868	0.209213	-0.637324	0.371512	0.699527	0.351548	not_expressed
AARA000965	178	125	142	1032	1152	851	351	412	166	142	80	139	-0.339179	0.345325	-2.64453	1.96e-28	0.315793	0.236334	-1.98956	4.7e-17	Fe_RT_strong
AARA000966	45	29	35	8	8	11	80	112	61	18	4	46	-0.122255	0.907247	1.68312	0.0066334	0.937744	0.10286	2.74312	3.52e-06	unbiased
AARA000967	128	100	108	6	4	5	233	777	362	8	1	32	0.659824	0.510126	1.72534	0.0271222	4.00414	1.97e-09	5.06966	1.13e-12	unbiased
AARA000968	15	15	16	86	116	123	27	25	13	19	9	11	-0.871246	0.0612086	-2.59231	1.09e-14	-0.285225	0.499238	-2.00629	4.84e-10	Fe_RT_specific
AARA000969	158	159	166	255	294	250	532	673	320	169	34	196	0.284369	0.673058	-0.645013	0.124429	0.986565	0.0154564	0.0571839	0.897662	unbiased
AARA000970	1	0	1	2	0	3	11	7	2	0	0	0	1.76625	NA	-2.87779	0.117503	4.12005	0.0186076	-0.523999	0.745842	not_expressed
AARA000971	0	1	0	51	23	19	0	0	1	0	1	0	-1.03472	0.716851	-5.62428	2.45e-05	-0.795418	0.661408	-5.38498	6.52e-05	not_expressed
AARA000972	16	17	21	3	2	1	36	68	28	3	6	5	-0.0968215	0.906408	1.6077	0.0424426	2.12357	8.02e-05	3.82809	2.14e-08	unbiased
AARA000973	3	8	14	2	6	0	18	33	13	1	1	1	-0.0199318	0.989344	-0.783686	0.505463	3.11975	0.00158493	2.356	0.00524989	unbiased
AARA000974	2	9	14	1	2	0	9	23	15	1	0	0	-0.347763	0.81732	-0.741386	0.646553	3.97707	0.00214298	3.58345	0.000816362	unbiased
AARA000975	140	123	130	296	473	379	501	664	291	208	49	135	0.499914	0.213402	-1.15589	8.89e-05	0.928992	0.00175104	-0.726812	0.0144125	Fe_RT_weak
AARA000976	304	217	306	32	144	152	1036	1188	473	170	84	242	0.303134	0.665529	1.09907	0.0112074	1.39675	0.000886685	2.19268	1.35e-07	unbiased
AARA000977	189	157	227	245	330	274	817	886	355	160	70	109	0.446803	0.0817922	-0.894365	2.38e-05	1.56532	1.83e-14	0.224154	0.301651	unbiased
AARA000978	1	0	1	16	36	26	4	3	2	9	5	5	0.603343	0.75814	-1.53891	0.00770155	-2.02966	0.00553351	-4.17192	2.55e-05	Fe_RT_weak
AARA000979	92	67	86	244	416	340	146	319	132	59	29	50	-0.102997	0.831318	-2.38711	1.08e-19	1.07671	8.21e-05	-1.20739	1.67e-06	Fe_RT_strong
AARA000980	3094	4128	3970	448	716	537	7670	14662	4751	1568	557	1206	-0.169598	0.711896	1.37373	1.76e-07	1.97741	1.74e-14	3.52074	3.05e-43	unbiased
AARA000981	24	36	26	3	2	1	133	100	64	4	3	5	0.442975	0.473769	1.35634	0.0985163	3.57651	8.24e-11	4.48988	2.37e-11	unbiased
AARA000982	483	464	455	13	23	12	767	1179	383	102	78	152	-0.708298	0.0167326	3.23696	2.83e-23	1.7006	2.08e-11	5.64586	4e-72	unbiased
AARA000983	175	156	251	14	18	5	14	23	10	1417	707	1654	-4.95929	1.35e-38	7.0318	1.07e-75	-7.28451	1.33e-86	4.70658	7.64e-34	Ma_RT_specific
AARA000984	1083	485	1119	814	1199	1113	442	567	174	124	115	245	-2.59287	2.07e-12	-2.18734	1.07e-09	0.162696	0.694673	0.568225	0.125972	Fe_Ubi_weak
AARA000985	467	338	599	323	502	461	282	215	112	116	45	90	-2.54731	2.99e-20	-1.91647	9.38e-12	0.292286	0.350802	0.923134	0.000686491	Fe_Car_strong
AARA000986	112	105	141	189	332	316	474	518	240	156	60	128	0.408095	0.160706	-0.836367	0.000165665	0.840621	0.000133189	-0.403842	0.0740298	unbiased
AARA000987	17	10	12	31	48	46	87	102	48	39	10	23	1.21644	0.00504681	-0.369209	0.330486	0.726938	0.0375088	-0.858708	0.0280475	unbiased
AARA000988	0	0	0	0	0	2	1	1	1	1	0	3	1.77351	NA	1.19966	0.512548	-1.08091	0.548228	-1.65475	0.42754	not_expressed
AARA000989	27	1	31	1506	3197	2390	13	10	6	47	35	64	-2.2736	0.00148278	-5.01141	1.01e-20	-3.26063	8.02e-08	-5.99844	1.92e-27	Fe_RT_strong
AARA000990	61	47	71	128	213	154	135	262	84	37	10	34	-0.00273591	0.997223	-2.16717	5.21e-12	1.50778	2.32e-06	-0.656662	0.0275845	Fe_RT_weak
AARA000991	224	189	221	250	383	288	428	804	314	144	47	138	-0.115184	0.818097	-1.06859	0.000131139	1.22095	9.93e-06	0.267545	0.355057	unbiased
AARA000992	253	190	246	261	398	364	447	495	210	151	146	125	-0.646814	0.0118664	-0.762228	0.000644549	0.353747	0.127508	0.238332	0.300021	unbiased
AARA000993	150	151	157	240	331	335	436	655	326	178	90	157	0.267024	0.297109	-0.645084	0.000495503	0.736345	5.06e-05	-0.175763	0.36515	unbiased
AARA000994	184	205	219	338	492	473	453	862	390	357	80	343	0.114629	0.868071	-0.35984	0.369575	0.188079	0.650685	-0.28639	0.47166	unbiased
AARA000995	1666	1330	1460	218	298	273	10530	11156	4833	784	710	882	1.1775	3.55e-09	2.08101	9.29e-27	2.39066	1.21e-37	3.29417	2.71e-66	Ma_Car_weak
AARA000996	26	31	46	133	218	210	82	81	38	35	18	35	-0.407762	0.315149	-2.19839	4.59e-16	0.163882	0.616135	-1.62674	7.33e-10	Fe_RT_specific
AARA000997	9	9	16	44	64	41	79	103	39	33	18	24	1.28901	0.00207418	-0.535874	0.111454	0.502322	0.127965	-1.32256	0.000370644	unbiased
AARA000998	1214	1458	1334	3394	4272	4485	2980	3357	1357	461	114	387	-0.46583	0.297405	-3.26964	2.71e-26	2.01183	1.25e-10	-0.791979	0.0126341	Fe_RT_strong
AARA000999	95	77	108	6	8	34	27	49	19	2	0	2	-2.91544	4.64e-08	-2.88175	0.000663243	3.29119	7.12e-05	3.32488	1.42e-10	Fe_Car_specific
AARA001000	543	563	590	169	217	202	1569	1638	669	2093	2588	2613	-0.21136	0.625042	4.14382	6.81e-59	-2.03773	1.03e-15	2.31745	5.55e-19	Ma_RT_strong
AARA001001	5	3	6	5	6	5	7	13	2	3	3	0	-0.786762	NA	-0.885513	0.344608	0.672977	0.47187	0.574226	0.484062	not_expressed
AARA001002	627	308	807	444	587	582	601	689	323	65	56	251	-1.43989	0.0146968	-1.64111	0.00112899	1.07556	0.0363416	0.874341	0.0856384	Fe_Ubi_weak
AARA001003	158	149	134	485	663	556	593	750	325	264	105	176	0.524078	0.036662	-1.2244	7.22e-10	0.606798	0.00299821	-1.14168	1.16e-08	Fe_RT_weak
AARA001004	154	96	135	3244	4863	4324	345	603	246	184	78	165	0.241183	0.501955	-4.41804	2.59e-92	0.464208	0.0507906	-4.19501	1.19e-82	Fe_RT_strong
AARA001005	1	1	0	1	0	0	1	2	0	0	0	0	-0.758948	NA	-1.31262	NA	1.82221	NA	1.26854	NA	not_expressed
[truncated: 12,673 more rows]

## Sheet: An. minimus
geneID	Female_Car1	Female_Car2	Female_Car3	Female_RT1	Female_RT2	Female_RT3	Male_Car1	Male_Car2	Male_Car3	Male_RT1	Male_RT2	Male_RT3	log2FC_Carc	padj_Carc	log2FC_RT	padj_RT	log2FC_M	padj_M	log2FC_F	padj_F	final.class.corr
[truncated: 13,128 more rows]

[truncated: 2 more sheets: An. albimanus, Legend]
