# Supplementary material for: Rapid evolution of female-biased genes among four species of Anopheles malaria mosquitoes
Source: HighWire-hosted journal article supplement (doi:10.1101/gr.217216.116), 2017-07-26
Supplement: Supplemental_Table_S2.xlsx [file Supplemental_Table_S2.xlsx]

## Sheet: 7400_Orthologs
OrthoGroup	AgamOrthos	AaraOrthos	AminOrthos	AalbOrthos	Gam_final.class.corr	Ara_final.class.corr	Min_final.class.corr	Alb_final.class.corr	evorate	AnodNdS
MZ22500000	AGAP011396	AARA002899	AMIN009319	AALB003958	Ma_Car_weak	unbiased	unbiased	unbiased	0.9177	0.04115
MZ22500007	AGAP007388	AARA008002	AMIN010487	AALB005751	Fe_Car_specific	Fe_Car_strong	unbiased	Fe_Ubi_weak	1.0508	0.09996
MZ22500009	AGAP012372	AARA003448	AMIN008951	AALB003785	unbiased	unbiased	unbiased	unbiased	0.9475	0.06151
MZ22500010	AGAP002015	AARA006929	AMIN003326	AALB007133	unbiased	unbiased	unbiased	unbiased	0.8264	0.00917
MZ22500012	AGAP007960	AARA005166	AMIN006308	AALB000841	unbiased	unbiased	unbiased	unbiased	0.9512	0.02983
MZ22500017	AGAP000331	AARA002610	AMIN005483	AALB003707	unbiased	unbiased	unbiased	unbiased	0.8587	0.01863
MZ22500019	AGAP001633	AARA002078	AMIN003443	AALB008645	unbiased	unbiased	unbiased	unbiased	0.9274	0.0201
MZ22500020	AGAP010750	AARA008956	AMIN009214	AALB010156	Ma_Car_weak	unbiased	unbiased	unbiased	0.8333	0.01271
MZ22500022	AGAP007563	AARA008127	AMIN010369	AALB006229	unbiased	unbiased	unbiased	Ma_Car_weak	0.8397	0.01976
MZ22500024	AGAP001157	AARA001629	AMIN002312	AALB009416	unbiased	unbiased	unbiased	unbiased	0.9763	0.03193
MZ22500025	AGAP011823	AARA000638	AMIN004329	AALB010248	unbiased	unbiased	unbiased	Ma_RT_strong	0.9459	0.0439
MZ22500026	AGAP007924	AARA005198	AMIN006427	AALB001406	not_expressed	unbiased	not_expressed	not_expressed	0.9313	0.03781
MZ22500028	AGAP001660	AARA002105	AMIN003471	AALB008747	Ma_RT_specific	Ma_RT_specific	Ma_RT_specific	Ma_RT_specific	0.904	0.03736
MZ22500029	AGAP002651	AARA004191	AMIN003651	AALB003510	unbiased	unbiased	unbiased	unbiased	1.0909	0.10109
MZ22500030	AGAP007675	AARA008231	AMIN010314	AALB005426	Ma_RT_specific	Ma_RT_specific	Ma_RT_specific	Ma_RT_specific	0.9	0.03858
MZ22500032	AGAP003271	AARA001351	AMIN000368	AALB009503	Ma_Car_specific	Ma_Car_strong	Ma_Car_specific	Ma_Car_specific	0.8186	0.0115
MZ22500038	AGAP001287	AARA001754	AMIN002194	AALB009200	unbiased	unbiased	unbiased	unbiased	0.964	0.05696
MZ22500040	AGAP010435	AARA005925	AMIN004992	AALB007598	Ma_Car_specific	Ma_Car_specific	Ma_Car_specific	Ma_Car_specific	0.8287	0.01107
MZ22500041	AGAP001672	AARA002114	AMIN003479	AALB008059	Ma_RT_specific	Ma_RT_specific	Ma_RT_specific	Ma_RT_specific	0.8536	0.01967
MZ22500047	AGAP009568	AARA011814	AMIN009871	AALB000501	Ma_RT_specific	Ma_RT_strong	Ma_RT_strong	Ma_RT_strong	0.8476	0.01851
MZ22500049	AGAP009780	AARA003995	AMIN009514	AALB000804	unbiased	unbiased	unbiased	unbiased	1.0138	0.06546
MZ22500052	AGAP002009	AARA006936	AMIN003318	AALB007139	Ma_RT_specific	Ma_RT_specific	Ma_RT_specific	Ma_RT_specific	0.8747	0.02528
MZ22500053	AGAP005471	AARA002327	AMIN010806	AALB005215	Ma_Car_weak	unbiased	unbiased	Ma_Car_weak	0.9482	0.05778
MZ22500060	AGAP010884	AARA008823	AMIN009275	AALB006960	unbiased	unbiased	unbiased	unbiased	1.0099	0.02636
MZ22500062	AGAP011441	AARA002861	AMIN008988	AALB009802	Ma_RT_specific	Ma_RT_specific	Ma_RT_specific	Ma_RT_specific	0.8665	0.02642
MZ22500064	AGAP003967	AARA009828	AMIN000311	AALB007263	unbiased	unbiased	unbiased	Ma_RT_weak	1.2734	0.1645
MZ22500066	AGAP005526	AARA002285	AMIN010850	AALB005956	unbiased	unbiased	unbiased	unbiased	1.0634	0
MZ22500067	AGAP000222	AARA010554	AMIN005532	AALB006398	Ma_Ubi_weak	unbiased	unbiased	Ma_Car_weak	1.2512	0
MZ22500070	AGAP010790	AARA008921	AMIN007026	AALB010695	not_expressed	Fe_RT_specific	Fe_RT_specific	Ma_RT_specific	0.9485	0.05646
MZ22500071	AGAP003226	AARA001319	AMIN000401	AALB009530	Ma_RT_specific	Ma_RT_specific	Ma_RT_specific	Ma_RT_specific	0.8969	0.02513
MZ22500073	AGAP004993	AARA003587	AMIN011475	AALB007297	unbiased	unbiased	unbiased	unbiased	0.9286	0.04455
MZ22500075	AGAP003656	AARA010141	AMIN004012	AALB009024	unbiased	unbiased	unbiased	unbiased	1.0776	0.08129
MZ22500078	AGAP002739	AARA004106	AMIN003575	AALB008942	unbiased	unbiased	unbiased	Ma_RT_specific	0.8582	0.0206
MZ22500079	AGAP004440	AARA006363	AMIN004822	AALB003172	unbiased	unbiased	unbiased	unbiased	0.8797	0.02342
MZ22500080	AGAP005533	AARA002280	AMIN010855	AALB005951	unbiased	unbiased	unbiased	unbiased	0.8861	0.01529
MZ22500081	AGAP003489	AARA001562	AMIN000901	AALB007199	Ma_RT_strong	Ma_RT_strong	Ma_RT_strong	unbiased	1.0718	0.09329
MZ22500084	AGAP004850	AARA006112	AMIN011634	AALB004307	unbiased	unbiased	unbiased	Fe_RT_weak	0.8962	0.03745
MZ22500088	AGAP008482	AARA011093	AMIN009820	AALB000596	Ma_Car_weak	unbiased	unbiased	Fe_RT_weak	1.1542	0.12714
MZ22500089	AGAP004144	AARA009654	AMIN004213	AALB008638	unbiased	unbiased	unbiased	unbiased	1.0734	0.11184
MZ22500095	AGAP009990	AARA003786	AMIN006738	AALB001599	unbiased	unbiased	unbiased	Fe_RT_weak	1.4623	0.12579
MZ22500096	AGAP011177	AARA005615	AMIN008408	AALB007039	unbiased	unbiased	unbiased	unbiased	1.0548	0.08823
MZ22500097	AGAP010490	AARA006347	AMIN001240	AALB009841	unbiased	unbiased	unbiased	unbiased	0.9082	0.03663
MZ22500098	AGAP002741	AARA004103	AMIN003572	AALB009472	unbiased	unbiased	unbiased	Ma_Car_weak	1.1932	0.0695
MZ22500100	AGAP012253	AARA003339	AMIN006914	AALB010178	unbiased	Fe_RT_strong	unbiased	unbiased	1.1723	0.12684
MZ22500101	AGAP010861	AARA008848	AMIN004474	AALB010638	Fe_Car_weak	unbiased	unbiased	Ma_RT_strong	1.0148	0.08664
MZ22500102	AGAP003703	AARA010095	AMIN004703	AALB002767	unbiased	unbiased	unbiased	unbiased	1.186	0.04703
MZ22500105	AGAP006379	AARA000890	AMIN007987	AALB004898	unbiased	unbiased	unbiased	unbiased	0.929	0.06215
MZ22500107	AGAP005082	AARA003096	AMIN007593	AALB007293	unbiased	unbiased	unbiased	unbiased	0.9405	0.04173
MZ22500114	AGAP011526	AARA002770	AMIN009070	AALB010150	Ma_Car_weak	unbiased	unbiased	unbiased	0.9008	0.03725
MZ22500115	AGAP007788	AARA011986	AMIN006373	AALB008017	unbiased	unbiased	unbiased	unbiased	1.2684	0.0508
MZ22500118	AGAP009143	AARA008684	AMIN009689	AALB000640	unbiased	unbiased	unbiased	unbiased	0.8725	0.02847
MZ22500120	AGAP009057	AARA006530	AMIN001052	AALB001074	unbiased	unbiased	unbiased	unbiased	0.9765	0.05713
MZ22500123	AGAP001826	AARA007073	AMIN000425	AALB002226	unbiased	Ma_Car_weak	unbiased	unbiased	0.9487	0.0593
MZ22500124	AGAP001566	AARA002017	AMIN003384	AALB002477	Ma_Car_weak	unbiased	unbiased	Ma_Car_weak	0.8573	0.01739
MZ22500132	AGAP000368	AARA010749	AMIN005676	AALB006441	unbiased	unbiased	unbiased	unbiased	1.1864	0.08598
MZ22500133	AGAP000017	AARA010306	AMIN002083	AALB006906	unbiased	unbiased	unbiased	Fe_RT_strong	0.9992	0.0552
MZ22500134	AGAP005285	AARA011454	AMIN010766	AALB004393	unbiased	unbiased	Ma_RT_specific	Ma_Car_weak	1.3371	0.05586
MZ22500135	AGAP002737	AARA004108	AMIN003577	AALB008944	unbiased	unbiased	unbiased	unbiased	1.0214	0.08069
MZ22500139	AGAP008185	AARA004945	AMIN006093	AALB000555	Ma_RT_specific	Ma_RT_weak	Ma_RT_strong	unbiased	0.9824	0.06859
MZ22500141	AGAP009632	AARA011375	AMIN001485	AALB001910	Ma_RT_weak	Ma_RT_weak	Ma_RT_weak	Fe_RT_weak	1.363	0.15343
MZ22500142	AGAP007562	AARA008124	AMIN010371	AALB006231	unbiased	unbiased	unbiased	unbiased	1.0345	0.06153
MZ22500144	AGAP011930	AARA000722	AMIN008606	AALB003756	Ma_Car_strong	Ma_Car_specific	unbiased	unbiased	0.9267	0.06098
MZ22500147	AGAP003681	AARA010110	AMIN004689	AALB010871	unbiased	unbiased	unbiased	unbiased	1.13	0.10881
MZ22500149	AGAP003140	AARA001244	AMIN004639	AALB007278	unbiased	unbiased	unbiased	Ma_Car_weak	0.8469	0.01625
MZ22500152	AGAP006475	AARA008356	AMIN007893	AALB004722	unbiased	unbiased	unbiased	Fe_RT_weak	0.892	0.02771
MZ22500154	AGAP001881	AARA007043	AMIN000451	AALB008834	unbiased	unbiased	Fe_Car_strong	Fe_Car_strong	1.0703	0.11156
MZ22500156	AGAP007905	AARA005221	AMIN007094	AALB001371	not_expressed	not_expressed	not_expressed	unbiased	0.9078	0.02712
MZ22500158	AGAP002268	AARA006670	AMIN000136	AALB008409	unbiased	unbiased	unbiased	unbiased	1.1546	0.12527
MZ22500164	AGAP010088	AARA003690	AMIN006639	AALB007940	unbiased	unbiased	unbiased	Fe_RT_weak	1.0381	0.06728
MZ22500166	AGAP007474	AARA008049	AMIN010442	AALB005131	unbiased	unbiased	unbiased	unbiased	0.8541	0.01746
MZ22500169	AGAP011034	AARA005465	AMIN004352	AALB009914	Ma_Car_weak	unbiased	unbiased	Ma_Car_weak	0.8495	0.01814
MZ22500170	AGAP005033	AARA003148	AMIN011521	AALB009753	Fe_RT_weak	unbiased	unbiased	Fe_RT_weak	1.2314	0.14463
MZ22500172	AGAP000810	AARA010303	AMIN001984	AALB003331	unbiased	unbiased	unbiased	unbiased	0.968	0.04619
MZ22500173	AGAP008584	AARA011000	AMIN009156	AALB000075	Ma_RT_specific	Ma_RT_strong	unbiased	unbiased	0.9382	0.06395
MZ22500174	AGAP010655	AARA009044	AMIN008696	AALB010736	unbiased	unbiased	unbiased	Ma_Car_weak	1.084	0.13521
MZ22500176	AGAP007873	AARA005251	AMIN007131	AALB001359	unbiased	unbiased	unbiased	unbiased	0.8889	0.0271
MZ22500177	AGAP002274	AARA004055	AMIN004553	AALB003905	Ma_Car_weak	unbiased	unbiased	Ma_Car_weak	1.1688	0.0912
MZ22500179	AGAP001194	AARA001663	AMIN002283	AALB009387	Ma_Car_weak	unbiased	unbiased	Ma_Car_weak	1.13	0.09469
MZ22500180	AGAP005288	AARA011451	AMIN010762	AALB004390	Fe_RT_weak	unbiased	unbiased	Ma_Car_weak	1.2853	0.11275
MZ22500181	AGAP001700	AARA002152	AMIN003511	AALB002440	Fe_RT_weak	Fe_RT_weak	unbiased	Fe_RT_weak	0.8953	0.03863
MZ22500182	AGAP010686	AARA009018	AMIN008676	AALB010729	Fe_RT_weak	unbiased	Ma_RT_weak	Fe_RT_strong	1.6602	0.19782
MZ22500183	AGAP009276	AARA000315	AMIN001721	AALB001450	unbiased	unbiased	unbiased	unbiased	1.084	0.05933
MZ22500190	AGAP009511	AARA011869	AMIN001883	AALB000195	unbiased	unbiased	unbiased	unbiased	0.9985	0.05009
MZ22500194	AGAP003872	AARA009923	AMIN000233	AALB003109	unbiased	Fe_RT_weak	unbiased	unbiased	1.0499	0.10025
MZ22500197	AGAP009917	AARA003863	AMIN006823	AALB000372	Fe_Car_specific	Fe_Car_specific	Fe_Car_specific	unbiased	1.3055	0.15329
MZ22500202	AGAP004541	AARA006457	AMIN004909	AALB002984	unbiased	unbiased	Fe_RT_weak	Fe_RT_weak	1.8913	0.23406
MZ22500204	AGAP007086	AARA007746	AMIN011224	AALB005943	Ma_Ubi_specific	unbiased	unbiased	Ma_Car_weak	0.9427	0.05118
MZ22500205	AGAP001015	AARA011754	AMIN005390	AALB006920	unbiased	unbiased	unbiased	Fe_RT_specific	0.885	0.02162
MZ22500208	AGAP002648	AARA004195	AMIN003916	AALB003515	unbiased	not_expressed	unbiased	Fe_RT_weak	0.893	0.04145
MZ22500211	AGAP000443	AARA010678	AMIN005589	AALB006491	Ma_Car_weak	unbiased	unbiased	Ma_Car_weak	1.0676	0.08254
MZ22500214	AGAP012452	AARA004053	AMIN004551	AALB002929	not_expressed	unbiased	unbiased	Ma_Car_weak	1.2326	0.0989
MZ22500215	AGAP010313	AARA002497	AMIN006447	AALB007544	unbiased	unbiased	Fe_RT_weak	unbiased	1.1615	0.11312
MZ22500216	AGAP001899	AARA007030	AMIN000464	AALB008822	unbiased	unbiased	unbiased	unbiased	0.8406	0.02085
MZ22500219	AGAP000198	AARA000967	AMIN005406	AALB006880	Ma_Car_specific	unbiased	not_expressed	unbiased	1.116	0.09193
MZ22500230	AGAP000015	AARA010308	AMIN002081	AALB006448	unbiased	unbiased	unbiased	unbiased	1.1479	0.10203
MZ22500233	AGAP006885	AARA009210	AMIN007658	AALB005710	unbiased	unbiased	unbiased	unbiased	0.8095	0.00494
MZ22500234	AGAP005175	AARA003002	AMIN007340	AALB003200	Fe_Car_weak	Fe_Car_weak	unbiased	unbiased	0.8406	0.01438
MZ22500235	AGAP005771	AARA005654	AMIN011068	AALB006100	unbiased	unbiased	unbiased	Fe_RT_weak	0.9004	0.03573
MZ22500239	AGAP007537	AARA008103	AMIN010394	AALB005449	unbiased	unbiased	unbiased	Ma_Car_weak	1.4273	0.15041
MZ22500243	AGAP007605	AARA008166	AMIN010245	AALB006181	unbiased	Ma_RT_weak	unbiased	unbiased	0.9692	0.04795
MZ22500244	AGAP002763	AARA004584	AMIN003553	AALB003065	unbiased	Fe_RT_weak	Ma_RT_specific	not_expressed	1.377	0.15858
MZ22500251	AGAP000685	AARA010372	AMIN005857	AALB006685	not_expressed	unbiased	unbiased	unbiased	1.1318	0.1093
MZ22500252	AGAP006686	AARA008561	AMIN010139	AALB005359	unbiased	unbiased	unbiased	unbiased	0.8185	0.00618
MZ22500257	AGAP009176	AARA008715	AMIN009721	AALB000348	Fe_Car_weak	Ma_Car_weak	unbiased	unbiased	0.8811	0.03152
MZ22500259	AGAP008400	AARA011168	AMIN005910	AALB001011	Ma_Car_weak	unbiased	unbiased	Ma_Car_weak	0.8572	0.02463
MZ22500265	AGAP028125	AARA009491	AMIN009379	AALB007980	Ma_RT_specific	unbiased	unbiased	Ma_RT_specific	0.8597	0.01284
MZ22500267	AGAP001662	AARA002107	AMIN003473	AALB008749	unbiased	unbiased	unbiased	unbiased	1.0492	0.10646
MZ22500268	AGAP003873	AARA009922	AMIN000234	AALB003108	unbiased	Ma_RT_weak	unbiased	unbiased	0.8791	0.03617
MZ22500275	AGAP011162	AARA005599	AMIN008422	AALB007054	unbiased	unbiased	Fe_Car_weak	unbiased	0.9803	0.0641
MZ22500276	AGAP001780	AARA000459	AMIN000706	AALB003458	unbiased	unbiased	unbiased	unbiased	0.9977	0.06373
MZ22500277	AGAP005213	AARA001576	AMIN010736	AALB004365	unbiased	unbiased	unbiased	unbiased	0.9141	0.04193
MZ22500278	AGAP007849	AARA012044	AMIN007157	AALB001906	unbiased	unbiased	Ma_RT_strong	unbiased	0.9313	0.05966
MZ22500280	AGAP006776	AARA009110	AMIN010065	AALB005263	unbiased	Fe_RT_weak	unbiased	Fe_RT_weak	1.2522	0.19739
MZ22500281	AGAP008017	AARA005107	AMIN006249	AALB001170	unbiased	unbiased	unbiased	Fe_RT_weak	1.0592	0.08038
MZ22500285	AGAP002982	AARA004804	AMIN003685	AALB009092	unbiased	Fe_RT_weak	unbiased	Fe_RT_strong	1.1914	0.12946
MZ22500286	AGAP008512	AARA011068	AMIN001452	AALB000712	Ma_Car_specific	unbiased	unbiased	unbiased	1.0322	0.01308
MZ22500287	AGAP005739	AARA005678	AMIN011047	AALB005259	Ma_Car_weak	unbiased	unbiased	unbiased	1.1509	0.09224
MZ22500289	AGAP004615	AARA011634	AMIN000038	AALB008322	Fe_RT_weak	Fe_RT_specific	Fe_RT_weak	Fe_RT_weak	0.8991	0.04095
MZ22500292	AGAP010895	AARA008809	AMIN009287	AALB004006	unbiased	unbiased	unbiased	unbiased	0.8301	0.01097
MZ22500294	AGAP000659	AARA010395	AMIN005756	AALB007757	Fe_RT_weak	Fe_RT_weak	Fe_RT_weak	Fe_RT_weak	0.9478	0.05041
MZ22500300	AGAP009022	AARA011925	AMIN001571	AALB001215	not_expressed	not_expressed	not_expressed	not_expressed	0.957	0.05522
MZ22500302	AGAP027998	AARA002713	AMIN008858	AALB004070	unbiased	unbiased	unbiased	Fe_RT_weak	1.7666	0.22621
MZ22500303	AGAP005472	AARA002325	AMIN010808	AALB005216	unbiased	unbiased	unbiased	unbiased	0.9276	0.04688
MZ22500308	AGAP001234	AARA001710	AMIN002238	AALB009341	unbiased	unbiased	Fe_RT_weak	unbiased	0.897	0.04095
MZ22500311	AGAP010896	AARA008808	AMIN009288	AALB004005	Fe_RT_weak	Fe_RT_weak	unbiased	unbiased	0.956	0.0614
MZ22500312	AGAP009937	AARA003838	AMIN006797	AALB001443	Ma_Car_weak	unbiased	unbiased	unbiased	0.9004	0.01973
MZ22500314	AGAP013467	AARA010035	AMIN002932	AALB002486	unbiased	Ma_Ubi_strong	Ma_Car_strong	unbiased	1.1133	0.11568
MZ22500316	AGAP028115	AARA011191	AMIN005931	AALB001483	unbiased	unbiased	unbiased	unbiased	0.9415	0.04651
MZ22500317	AGAP003290	AARA001370	AMIN000351	AALB008871	Fe_RT_specific	Fe_RT_specific	Fe_RT_specific	Fe_RT_specific	1.0324	0.10919
MZ22500318	AGAP004327	AARA005285	AMIN002973	AALB003064	Fe_RT_weak	Fe_RT_weak	unbiased	Fe_RT_weak	1.4661	0.18293
MZ22500321	AGAP006165	AARA007360	AMIN011297	AALB005844	Fe_RT_weak	Fe_RT_strong	Fe_RT_weak	Fe_RT_strong	1.1718	0.11475
MZ22500323	AGAP000020	AARA001156	AMIN002087	AALB000050	unbiased	unbiased	unbiased	unbiased	1.6393	0.17835
MZ22500324	AGAP001004	AARA011741	AMIN005399	AALB006689	Fe_RT_weak	Fe_RT_weak	unbiased	Fe_RT_weak	1.1494	0.0925
MZ22500325	AGAP002945	AARA004764	AMIN003171	AALB007239	unbiased	unbiased	unbiased	unbiased	0.9759	0.0779
MZ22500326	AGAP000893	AARA002579	AMIN001078	AALB006560	Ma_Car_weak	unbiased	unbiased	Ma_RT_specific	1.6544	0.29128
MZ22500327	AGAP004020	AARA009785	AMIN002589	AALB008522	unbiased	unbiased	unbiased	unbiased	0.9457	0.04668
MZ22500328	AGAP007280	AARA007903	AMIN010579	AALB005509	not_expressed	Fe_RT_specific	Fe_RT_specific	Ma_RT_weak	1.0948	0.04736
MZ22500332	AGAP001519	AARA001963	AMIN002410	AALB009157	unbiased	unbiased	unbiased	unbiased	0.841	0.01244
MZ22500333	AGAP000037	AARA001145	AMIN002097	AALB006826	Ma_Car_weak	unbiased	unbiased	Ma_Car_weak	0.8799	0.02338
MZ22500334	AGAP011118	AARA005554	AMIN008464	AALB004032	Ma_RT_weak	Ma_RT_weak	Ma_RT_weak	unbiased	1.1306	0.04873
MZ22500338	AGAP005290	AARA011449	AMIN010760	AALB004388	unbiased	Fe_RT_weak	unbiased	unbiased	1.1856	0.1379
MZ22500339	AGAP001535	AARA001981	AMIN002426	AALB009144	unbiased	unbiased	unbiased	Ma_Car_weak	1.1718	0.13035
MZ22500342	AGAP000300	AARA010635	AMIN001971	AALB006859	Fe_Car_strong	Fe_Car_strong	unbiased	unbiased	0.896	0.03797
MZ22500344	AGAP006360	AARA000869	AMIN008004	AALB005876	unbiased	unbiased	unbiased	unbiased	0.8534	0.02972
MZ22500345	AGAP007573	AARA008137	AMIN010238	AALB006219	Fe_RT_strong	Fe_RT_strong	unbiased	Fe_RT_weak	1.2627	0.1203
MZ22500347	AGAP009285	AARA000305	AMIN001729	AALB001461	unbiased	unbiased	unbiased	unbiased	0.9472	0.03563
MZ22500352	AGAP000058	AARA001119	AMIN002124	AALB006351	unbiased	unbiased	unbiased	Ma_Car_weak	1.0614	0.0538
MZ22500357	AGAP013386	AARA001670	AMIN002274	AALB009379	Fe_RT_weak	Fe_RT_weak	Fe_RT_weak	Fe_Ubi_weak	1.3077	0.206
MZ22500359	AGAP010801	AARA008911	AMIN007016	AALB010559	unbiased	unbiased	unbiased	unbiased	0.8348	0.01199
MZ22500360	AGAP000829	AARA002514	AMIN005555	AALB006657	unbiased	Fe_RT_weak	Fe_Car_weak	Fe_RT_weak	1.0104	0.04509
MZ22500361	AGAP000461	AARA010663	AMIN005604	AALB006682	Ma_Car_weak	unbiased	unbiased	Ma_Car_weak	0.8791	0.0272
MZ22500362	AGAP000635	AARA010418	AMIN005718	AALB006942	Ma_Car_weak	Ma_Car_weak	Ma_Car_weak	unbiased	0.9987	0.05732
MZ22500364	AGAP008535	AARA011048	AMIN001020	AALB008031	Ma_RT_weak	unbiased	unbiased	unbiased	0.8983	0.03131
MZ22500365	AGAP010192	AARA007123	AMIN001202	AALB008782	unbiased	unbiased	unbiased	Ma_RT_weak	0.8623	0.01977
MZ22500366	AGAP002215	AARA006726	AMIN000813	AALB008308	unbiased	unbiased	unbiased	unbiased	0.8829	0.03503
MZ22500367	AGAP006513	AARA008394	AMIN007860	AALB005613	Ma_RT_strong	Ma_RT_strong	unbiased	unbiased	0.8771	0.03417
MZ22500369	AGAP012160	AARA003256	AMIN008325	AALB010806	unbiased	unbiased	Fe_RT_weak	Fe_RT_weak	1.0734	0.09776
MZ22500373	AGAP008047	AARA005080	AMIN006224	AALB000001	unbiased	unbiased	unbiased	unbiased	0.9481	0.05018
MZ22500374	AGAP003648	AARA010153	AMIN002584	AALB008528	unbiased	unbiased	unbiased	unbiased	0.8364	0.0083
MZ22500377	AGAP002735	AARA004111	AMIN003580	AALB008946	unbiased	Fe_RT_weak	unbiased	Fe_RT_weak	1.4221	0.18689
MZ22500381	AGAP009344	AARA000259	AMIN001772	AALB001951	unbiased	unbiased	unbiased	unbiased	1.2854	0.04311
MZ22500385	AGAP008206	AARA004920	AMIN006068	AALB001850	unbiased	unbiased	unbiased	unbiased	0.9348	0.05133
MZ22500387	AGAP002656	AARA004185	AMIN003646	AALB003504	unbiased	unbiased	unbiased	unbiased	1.2953	0.13122
MZ22500388	AGAP003519	AARA006577	AMIN000879	AALB007228	unbiased	unbiased	unbiased	Fe_RT_weak	1.2103	0.07108
MZ22500389	AGAP000065	AARA001112	AMIN002130	AALB006641	Ma_Car_weak	unbiased	unbiased	Ma_Car_weak	0.9349	0.01609
MZ22500390	AGAP005093	AARA003091	AMIN007589	AALB007352	unbiased	unbiased	unbiased	unbiased	1.3125	0.20167
MZ22500391	AGAP011975	AARA000761	AMIN004393	AALB009942	Ma_RT_weak	Fe_RT_strong	unbiased	Fe_Car_weak	1.139	0.10906
MZ22500396	AGAP003616	AARA010179	AMIN002787	AALB009281	Fe_RT_weak	Fe_RT_weak	unbiased	unbiased	1.1104	0.11682
MZ22500398	AGAP002836	AARA004659	AMIN000603	AALB009039	Fe_RT_weak	Fe_RT_weak	unbiased	Fe_RT_weak	1.0822	0.10814
MZ22500400	AGAP007731	AARA011934	AMIN006316	AALB000744	unbiased	Fe_RT_weak	unbiased	unbiased	1.0372	0.08094
MZ22500402	AGAP003174	AARA001272	AMIN002761	AALB008734	unbiased	unbiased	unbiased	unbiased	1.0979	0.07534
MZ22500404	AGAP004166	AARA009630	AMIN004189	AALB002084	not_expressed	not_expressed	unbiased	Ma_RT_specific	0.882	0.03276
MZ22500405	AGAP004809	AARA006052	AMIN008148	AALB004580	unbiased	unbiased	Fe_Car_strong	Fe_Car_weak	1.0565	0.13263
MZ22500408	AGAP003366	AARA001456	AMIN000804	AALB002597	unbiased	unbiased	unbiased	unbiased	0.896	0.03509
MZ22500413	AGAP002692	AARA004152	AMIN003615	AALB008661	unbiased	Fe_RT_weak	unbiased	Fe_RT_weak	1.2893	0.1478
MZ22500415	AGAP004215	AARA011588	AMIN004138	AALB008388	unbiased	unbiased	unbiased	unbiased	0.951	0.07289
MZ22500421	AGAP011139	AARA005580	AMIN008439	AALB010783	Fe_RT_weak	Fe_RT_weak	Fe_RT_weak	Fe_RT_strong	0.9062	0.03092
MZ22500424	AGAP000389	AARA010725	AMIN005653	AALB007774	Ma_Car_specific	unbiased	unbiased	Ma_Car_weak	0.9091	0.01083
MZ22500427	AGAP005187	AARA002994	AMIN007348	AALB003207	unbiased	Fe_RT_weak	unbiased	unbiased	1.368	0.16712
MZ22500429	AGAP001754	AARA002206	AMIN000761	AALB008199	Fe_RT_weak	Fe_RT_weak	unbiased	Fe_RT_weak	1.177	0.06711
MZ22500432	AGAP007186	AARA007833	AMIN010640	AALB005654	unbiased	unbiased	unbiased	Fe_RT_weak	1.3227	0.17125
MZ22500434	AGAP008242	AARA011316	AMIN006045	AALB000172	unbiased	unbiased	unbiased	unbiased	1.0408	0.09268
MZ22500438	AGAP000064	AARA001114	AMIN002128	AALB006355	Fe_RT_weak	Fe_RT_weak	unbiased	Fe_RT_weak	0.844	0.01555
MZ22500440	AGAP001381	AARA001833	AMIN000561	AALB003547	unbiased	unbiased	unbiased	unbiased	0.8876	0.04071
MZ22500442	AGAP004320	AARA011481	AMIN002981	AALB009044	unbiased	unbiased	unbiased	unbiased	0.9191	0.03232
MZ22500443	AGAP012236	AARA003322	AMIN006931	AALB010198	unbiased	unbiased	unbiased	unbiased	1.3733	0.21507
MZ22500445	AGAP004000	AARA009797	AMIN002821	AALB002651	unbiased	unbiased	unbiased	unbiased	0.9745	0.04189
MZ22500448	AGAP008297	AARA011272	AMIN006003	AALB001316	unbiased	unbiased	unbiased	unbiased	0.9003	0.03871
MZ22500449	AGAP001527	AARA001971	AMIN002417	AALB009152	unbiased	unbiased	unbiased	unbiased	0.9946	0.09116
MZ22500450	AGAP002523	AARA004341	AMIN002533	AALB009167	unbiased	unbiased	unbiased	unbiased	0.8815	0.03446
MZ22500453	AGAP008090	AARA005038	AMIN006182	AALB000974	Fe_RT_strong	Fe_RT_strong	Fe_RT_weak	Fe_RT_strong	0.9704	0.04711
MZ22500456	AGAP004143	AARA009656	AMIN004215	AALB008310	unbiased	unbiased	unbiased	unbiased	0.9433	0.07345
MZ22500458	AGAP010582	AARA000055	AMIN008184	AALB010391	unbiased	unbiased	unbiased	unbiased	0.9945	0.08206
MZ22500459	AGAP002505	AARA004358	AMIN002517	AALB009219	Ma_Car_weak	unbiased	unbiased	Ma_Car_weak	0.9623	0.05926
MZ22500461	AGAP013241	AARA004458	AMIN002682	AALB002264	not_expressed	unbiased	unbiased	unbiased	1.0774	0.07204
MZ22500462	AGAP010147	AARA003651	AMIN007227	AALB007909	unbiased	unbiased	unbiased	unbiased	0.8813	0.06128
MZ22500466	AGAP001523	AARA001967	AMIN002414	AALB009155	unbiased	unbiased	Fe_RT_weak	Fe_RT_weak	1.3154	0.20071
MZ22500468	AGAP011897	AARA000695	AMIN008580	AALB003731	Fe_RT_specific	Fe_RT_strong	Fe_RT_strong	Fe_RT_strong	1.0813	0.10483
MZ22500470	AGAP007771	AARA011966	AMIN006353	AALB000244	Fe_RT_weak	Fe_RT_weak	unbiased	Fe_RT_weak	1.6031	0.2754
MZ22500472	AGAP005707	AARA005714	AMIN011008	AALB004124	not_expressed	not_expressed	not_expressed	not_expressed	0.9638	0.08474
MZ22500473	AGAP004672	AARA005982	AMIN007518	AALB009747	unbiased	Fe_RT_weak	unbiased	unbiased	1.5162	0.20152
MZ22500474	AGAP007923	AARA005199	AMIN006426	AALB001407	not_expressed	unbiased	not_expressed	unbiased	1.103	0.09824
MZ22500475	AGAP004229	AARA011573	AMIN004123	AALB002097	unbiased	unbiased	unbiased	Fe_RT_weak	1.0019	0.0761
MZ22500480	AGAP005219	AARA002964	AMIN010731	AALB004359	Ma_Car_weak	unbiased	unbiased	Ma_Car_weak	0.8991	0.04336
MZ22500481	AGAP010393	AARA005882	AMIN006591	AALB003892	unbiased	unbiased	unbiased	Fe_RT_weak	1.5111	0.17803
MZ22500484	AGAP001591	AARA002036	AMIN003403	AALB002459	unbiased	unbiased	unbiased	not_expressed	0.9254	0.04921
MZ22500485	AGAP002597	AARA004262	AMIN003978	AALB003092	unbiased	unbiased	unbiased	unbiased	1.0173	0.06396
MZ22500486	AGAP011454	AARA002846	AMIN009000	AALB009814	unbiased	Fe_RT_weak	Fe_RT_weak	unbiased	1.3365	0.13422
MZ22500487	AGAP005101	AARA003082	AMIN010200	AALB004187	not_expressed	not_expressed	unbiased	Ma_RT_specific	1.0923	0.06133
MZ22500490	AGAP002058	AARA006891	AMIN003364	AALB009622	unbiased	Fe_RT_strong	Fe_Ubi_weak	unbiased	0.9814	0.0792
MZ22500502	AGAP000035	AARA001146	AMIN002096	AALB006544	unbiased	unbiased	unbiased	unbiased	1.5721	0.14881
MZ22500504	AGAP007533	AARA008099	AMIN010397	AALB005446	unbiased	Fe_RT_specific	Fe_Ubi_weak	Fe_RT_weak	1.1925	0.14775
MZ22500506	AGAP003221	AARA001315	AMIN000670	AALB009536	unbiased	unbiased	unbiased	Fe_RT_weak	0.967	0.05348
MZ22500509	AGAP004092	AARA009714	AMIN003818	AALB003617	unbiased	unbiased	unbiased	unbiased	1.0231	0.07936
MZ22500510	AGAP002682	AARA004161	AMIN003624	AALB008667	unbiased	unbiased	unbiased	Fe_RT_weak	1.3116	0.16073
MZ22500511	AGAP005765	AARA005658	AMIN011064	AALB006104	unbiased	unbiased	unbiased	Fe_RT_weak	1.1272	0.11273
MZ22500512	AGAP011036	AARA005467	AMIN008546	AALB009910	unbiased	unbiased	unbiased	unbiased	0.9646	0.06427
MZ22500515	AGAP009303	AARA000294	AMIN001740	AALB000299	unbiased	unbiased	unbiased	unbiased	1.0777	0.06568
MZ22500517	AGAP006280	AARA007253	AMIN008040	AALB003276	unbiased	unbiased	unbiased	Fe_RT_weak	0.96	0.06328
MZ22500520	AGAP003546	AARA006608	AMIN000851	AALB002516	unbiased	Fe_RT_weak	unbiased	unbiased	1.007	0.06619
MZ22500521	AGAP004039	AARA009767	AMIN002609	AALB003351	Fe_RT_weak	Fe_RT_strong	unbiased	unbiased	1.0964	0.05097
MZ22500523	AGAP009004	AARA009570	AMIN001551	AALB000543	Fe_Ubi_weak	unbiased	Fe_Ubi_weak	unbiased	1.0889	0.11015
MZ22500526	AGAP005811	AARA007697	AMIN011153	AALB004454	unbiased	unbiased	unbiased	unbiased	1.1466	0.10929
MZ22500528	AGAP004707	AARA002907	AMIN007480	AALB007478	Fe_RT_specific	unbiased	unbiased	Ma_Car_weak	0.9219	0.03131
MZ22500533	AGAP007640	AARA008203	AMIN010281	AALB006246	unbiased	unbiased	unbiased	unbiased	1.3231	0.15747
MZ22500536	AGAP002030	AARA006914	AMIN003339	AALB008883	unbiased	Fe_RT_weak	unbiased	Fe_RT_weak	1.0467	0.10842
MZ22500537	AGAP002793	AARA004615	AMIN003898	AALB002294	unbiased	unbiased	unbiased	Ma_Car_weak	0.8943	0.02539
MZ22500539	AGAP003579	AARA006641	AMIN000185	AALB003372	unbiased	unbiased	unbiased	unbiased	0.9084	0.06908
MZ22500540	AGAP004866	AARA006099	AMIN011647	AALB004850	Fe_RT_weak	Fe_RT_weak	unbiased	unbiased	1.3987	0.185
MZ22500547	AGAP005193	AARA002989	AMIN007353	AALB003210	Fe_RT_weak	Fe_RT_weak	unbiased	unbiased	0.9856	0.06426
MZ22500552	AGAP003882	AARA009910	AMIN000244	AALB008721	Fe_RT_weak	Fe_RT_weak	unbiased	unbiased	0.9456	0.05172
MZ22500553	AGAP011851	AARA000667	AMIN008556	AALB010284	unbiased	unbiased	Fe_Car_weak	unbiased	0.9398	0.05693
MZ22500554	AGAP007092	AARA007751	AMIN011228	AALB005915	unbiased	unbiased	Ma_Car_weak	Ma_Car_weak	0.8501	0.01478
MZ22500555	AGAP008848	AARA009387	AMIN001605	AALB000474	not_expressed	unbiased	unbiased	Fe_Car_strong	0.9168	0.0371
MZ22500557	AGAP006133	AARA007389	AMIN010681	AALB005665	Fe_RT_weak	unbiased	Fe_RT_weak	Fe_RT_weak	1.116	0.08361
MZ22500558	AGAP006735	AARA009072	AMIN010103	AALB006186	Ma_RT_specific	Ma_RT_specific	Ma_RT_specific	Ma_RT_specific	0.9543	0.0472
MZ22500562	AGAP003921	AARA009864	AMIN000277	AALB008170	Ma_Car_weak	unbiased	unbiased	unbiased	0.8573	0.00617
MZ22500563	AGAP007006	AARA009322	AMIN009990	AALB004238	unbiased	unbiased	unbiased	unbiased	0.8441	0.0155
MZ22500565	AGAP003013	AARA004840	AMIN003720	AALB009123	unbiased	unbiased	Fe_RT_weak	unbiased	1.3845	0.17998
MZ22500570	AGAP011123	AARA005561	AMIN008458	AALB004038	unbiased	unbiased	unbiased	unbiased	1.0131	0.05716
MZ22500572	AGAP000029	AARA001149	AMIN002093	AALB006547	unbiased	unbiased	unbiased	Fe_RT_weak	1.1078	0.05549
MZ22500573	AGAP009290	AARA000302	AMIN001732	AALB001464	Fe_RT_weak	unbiased	unbiased	Fe_RT_weak	0.9919	0.06496
MZ22500576	AGAP007143	AARA007804	AMIN011282	AALB005855	unbiased	unbiased	unbiased	unbiased	0.997	0.08626
MZ22500577	AGAP013492	AARA010010	AMIN002917	AALB002505	unbiased	unbiased	unbiased	unbiased	0.9658	0.073
MZ22500579	AGAP005752	AARA005670	AMIN011052	AALB006115	unbiased	unbiased	unbiased	unbiased	1.0287	0.10713
MZ22500580	AGAP001820	AARA000418	AMIN000415	AALB002217	unbiased	Ma_RT_weak	unbiased	unbiased	0.9783	0.06809
MZ22500581	AGAP008407	AARA011161	AMIN001690	AALB001018	Ma_RT_specific	unbiased	unbiased	Ma_Car_weak	0.912	0.04136
MZ22500582	AGAP010202	AARA007134	AMIN001187	AALB007847	Fe_RT_weak	unbiased	unbiased	Fe_RT_weak	1.1054	0.12024
MZ22500583	AGAP010519	AARA000099	AMIN001267	AALB010204	Ma_Car_weak	unbiased	Ma_Car_weak	Ma_Car_weak	0.8724	0.03135
MZ22500585	AGAP001296	AARA001761	AMIN002187	AALB009193	unbiased	unbiased	unbiased	unbiased	0.9918	0.07577
MZ22500589	AGAP006901	AARA009230	AMIN007678	AALB004901	Ma_Car_weak	Ma_Car_weak	unbiased	unbiased	1.0948	0.09738
MZ22500597	AGAP011822	AARA000637	AMIN004328	AALB010250	unbiased	unbiased	unbiased	Fe_RT_weak	0.9885	0.05389
MZ22500599	AGAP006256	AARA007283	AMIN008074	AALB003243	not_expressed	Fe_RT_specific	Fe_RT_specific	unbiased	0.9142	0.04232
MZ22500601	AGAP005330	AARA002460	AMIN007375	AALB005900	not_expressed	not_expressed	unbiased	Ma_RT_specific	0.842	0.0177
MZ22500605	AGAP006932	AARA009257	AMIN007704	AALB004971	Ma_RT_weak	Ma_RT_weak	unbiased	unbiased	1.0296	0.05995
MZ22500610	AGAP006436	AARA008311	AMIN007934	AALB005205	Fe_RT_weak	Fe_RT_strong	unbiased	Fe_RT_weak	1.0214	0.05764
MZ22500611	AGAP003610	AARA010189	AMIN002779	AALB009272	Ma_Car_weak	Ma_Car_weak	unbiased	Ma_Car_weak	0.9529	0.07617
MZ22500612	AGAP010090	AARA003688	AMIN006636	AALB007938	unbiased	unbiased	unbiased	Ma_Car_weak	0.8259	0.00835
MZ22500613	AGAP002715	AARA004133	AMIN003601	AALB008967	unbiased	Fe_RT_weak	unbiased	Fe_RT_weak	1.4443	0.19792
MZ22500614	AGAP001690	AARA002141	AMIN003500	AALB008862	Ma_RT_specific	unbiased	unbiased	Ma_Car_weak	1.1409	0.16871
MZ22500618	AGAP009200	AARA008736	AMIN009735	AALB001437	unbiased	unbiased	unbiased	Fe_Car_weak	1.0009	0.08221
MZ22500620	AGAP012090	AARA003191	AMIN008260	AALB010007	unbiased	unbiased	unbiased	Ma_Ubi_weak	0.9159	0.021
MZ22500624	AGAP012340	AARA003418	AMIN009358	AALB009970	Ma_RT_weak	Ma_RT_weak	unbiased	unbiased	1.7822	0.24298
MZ22500629	AGAP003001	AARA004830	AMIN003710	AALB009112	Fe_RT_specific	unbiased	Fe_RT_weak	Fe_RT_weak	0.9426	0.0746
MZ22500630	AGAP007761	AARA011958	AMIN006345	AALB000237	Ma_Car_weak	unbiased	Ma_Car_weak	Ma_Car_weak	0.8961	0.03282
MZ22500633	AGAP010981	AARA005440	AMIN008635	AALB010436	Fe_RT_weak	Fe_RT_weak	unbiased	Fe_RT_weak	1.2652	0.1285
MZ22500634	AGAP000273	AARA010609	AMIN005641	AALB006423	unbiased	Ma_RT_weak	unbiased	unbiased	0.9903	0.04403
MZ22500635	AGAP004692	AARA007230	AMIN007497	AALB009750	unbiased	unbiased	Fe_RT_weak	unbiased	1.3456	0.15804
MZ22500636	AGAP007032	AARA009351	AMIN011109	AALB005027	Fe_RT_weak	unbiased	Fe_RT_weak	Fe_RT_weak	1.5691	0.23625
MZ22500640	AGAP001209	AARA001685	AMIN002262	AALB009367	Ma_RT_weak	Ma_RT_weak	unbiased	unbiased	0.9718	0.06547
MZ22500642	AGAP003449	AARA001526	AMIN000942	AALB002831	Fe_Car_weak	Fe_Car_weak	Fe_Car_weak	Ma_RT_weak	0.932	0.02797
MZ22500644	AGAP004827	AARA006134	AMIN011611	AALB004865	unbiased	unbiased	unbiased	Ma_Car_weak	0.9686	0.10599
MZ22500645	AGAP006452	AARA008332	AMIN007914	AALB005187	Ma_Car_strong	Ma_Car_weak	unbiased	unbiased	0.88	0.02377
MZ22500648	AGAP009726	AARA004046	AMIN009466	AALB000117	Ma_Car_weak	unbiased	unbiased	Ma_Car_weak	0.8166	0.0031
MZ22500650	AGAP006965	AARA009289	AMIN007731	AALB004696	unbiased	Ma_Car_weak	Ma_Car_weak	unbiased	0.9241	0.04591
MZ22500654	AGAP008906	AARA009459	AMIN001677	AALB000683	unbiased	unbiased	unbiased	Ma_Car_strong	0.8836	0.03313
MZ22500655	AGAP009521	AARA011855	AMIN001897	AALB001865	unbiased	Fe_Car_weak	unbiased	unbiased	1.1168	0.10849
MZ22500658	AGAP006479	AARA008360	AMIN007888	AALB005644	Fe_RT_weak	Fe_RT_weak	unbiased	unbiased	0.9079	0.03962
MZ22500664	AGAP003164	AARA001265	AMIN002768	AALB008741	unbiased	unbiased	unbiased	Ma_RT_weak	0.92	0.04064
MZ22500665	AGAP013752	AARA004990	AMIN006138	AALB001510	not_expressed	not_expressed	not_expressed	Fe_Car_specific	1.5275	0.21286
MZ22500666	AGAP000427	AARA010693	AMIN005574	AALB010305	Fe_RT_strong	Fe_RT_specific	Fe_RT_specific	Fe_RT_strong	1.1489	0.10257
MZ22500668	AGAP011163	AARA005600	AMIN008421	AALB007053	Ma_Car_specific	Ma_Car_specific	Ma_Car_strong	Ma_Car_specific	0.838	0.02107
MZ22500670	AGAP004563	AARA006470	AMIN004926	AALB002970	Fe_RT_strong	Fe_RT_specific	Fe_RT_strong	Fe_Car_strong	0.9345	0.06797
MZ22500671	AGAP005343	AARA002448	AMIN007386	AALB005909	Fe_RT_weak	Fe_RT_weak	unbiased	unbiased	1.1554	0.15187
MZ22500675	AGAP028061	AARA010882	AMIN001355	AALB000216	Ma_Car_weak	unbiased	unbiased	unbiased	0.9953	0.04853
MZ22500677	AGAP006825	AARA009167	AMIN007622	AALB005310	unbiased	unbiased	unbiased	unbiased	0.9387	0.05435
MZ22500678	AGAP009762	AARA004013	AMIN009500	AALB000789	unbiased	unbiased	unbiased	unbiased	1.1021	0.12323
MZ22500680	AGAP005647	AARA005754	AMIN010185	AALB004119	Fe_RT_weak	unbiased	unbiased	Fe_RT_weak	1.4958	0.17797
MZ22500682	AGAP002226	AARA006715	AMIN000824	AALB009667	unbiased	unbiased	unbiased	Ma_Car_weak	0.8974	0.04461
MZ22500684	AGAP006528	AARA008413	AMIN007841	AALB005233	Ma_Car_weak	unbiased	unbiased	Ma_Car_weak	1.1237	0.10989
MZ22500687	AGAP013275	AARA010672	AMIN005595	AALB006577	unbiased	unbiased	unbiased	Ma_Car_weak	1.2065	0.07203
MZ22500688	AGAP009239	AARA008770	AMIN009766	AALB001730	unbiased	unbiased	unbiased	unbiased	1.1418	0.12395
MZ22500693	AGAP010062	AARA003711	AMIN006657	AALB007954	unbiased	unbiased	unbiased	unbiased	1.1365	0.03734
MZ22500698	AGAP000171	AARA000994	AMIN005428	AALB003701	unbiased	unbiased	unbiased	unbiased	1.1784	0.10854
MZ22500699	AGAP004008	AARA009792	AMIN002816	AALB002646	unbiased	unbiased	Fe_RT_weak	Fe_RT_weak	1.0604	0.10699
MZ22500701	AGAP004934	AARA003534	AMIN011427	AALB007307	unbiased	unbiased	unbiased	unbiased	0.8995	0.03834
MZ22500705	AGAP004246	AARA011553	AMIN004105	AALB008550	unbiased	unbiased	unbiased	unbiased	0.8425	0.01312
MZ22500708	AGAP007629	AARA008195	AMIN010270	AALB005411	unbiased	unbiased	unbiased	unbiased	0.8692	0.03076
MZ22500710	AGAP013411	AARA001217	AMIN003810	AALB003439	Fe_RT_weak	unbiased	unbiased	Fe_RT_weak	1.3307	0.1685
MZ22500715	AGAP002351	AARA004522	AMIN000221	AALB009048	unbiased	unbiased	unbiased	Ma_RT_weak	1.1191	0.10149
MZ22500721	AGAP003395	AARA001476	AMIN003880	AALB008905	unbiased	unbiased	unbiased	unbiased	0.9311	0.04334
MZ22500722	AGAP010781	AARA008930	AMIN007036	AALB010704	unbiased	unbiased	Fe_Car_weak	Fe_Car_specific	1.6185	0.18562
MZ22500723	AGAP010854	AARA008851	AMIN004472	AALB010634	unbiased	Ma_Ubi_weak	Ma_RT_specific	Ma_RT_specific	0.9449	0.04785
MZ22500725	AGAP011965	AARA000754	AMIN004338	AALB009935	unbiased	unbiased	unbiased	unbiased	0.9821	0.07146
MZ22500726	AGAP008221	AARA004914	AMIN006062	AALB001857	unbiased	unbiased	unbiased	Ma_Car_specific	0.9616	0.04667
MZ22500728	AGAP003021	AARA004848	AMIN003728	AALB002404	unbiased	unbiased	unbiased	unbiased	0.8119	0.00282
MZ22500731	AGAP001587	AARA002033	AMIN003400	AALB002462	Ma_RT_weak	Ma_RT_weak	unbiased	unbiased	0.8483	0.02224
MZ22500733	AGAP009835	AARA003935	AMIN009560	AALB000443	unbiased	unbiased	unbiased	unbiased	0.9852	0.04445
MZ22500734	AGAP012289	AARA003371	AMIN006887	AALB010078	unbiased	unbiased	unbiased	unbiased	1.1668	0.1192
MZ22500736	AGAP006472	AARA008352	AMIN007896	AALB004719	unbiased	Fe_RT_weak	Fe_RT_weak	Fe_RT_strong	1.2836	0.0321
MZ22500738	AGAP004507	AARA006432	AMIN004883	AALB003557	unbiased	unbiased	unbiased	Fe_RT_weak	0.8417	0.01923
MZ22500740	AGAP001726	AARA002176	AMIN003533	AALB008579	unbiased	Ma_RT_weak	unbiased	Ma_Car_weak	0.9743	0.06225
MZ22500741	AGAP006107	AARA007414	AMIN009951	AALB005036	unbiased	Fe_RT_weak	unbiased	Fe_RT_weak	0.8439	0.0139
MZ22500742	AGAP012366	AARA003444	AMIN009334	AALB003780	unbiased	unbiased	unbiased	unbiased	1.096	0.1245
MZ22500743	AGAP008559	AARA011022	AMIN000998	AALB000410	Ma_Car_weak	Ma_Car_weak	Ma_Car_strong	Ma_Car_strong	0.8367	0.02612
MZ22500746	AGAP005783	AARA007729	AMIN011209	AALB005803	unbiased	unbiased	Ma_RT_weak	Ma_RT_weak	1.3569	0.17507
MZ22500752	AGAP007010	AARA009329	AMIN011129	AALB004641	unbiased	unbiased	unbiased	unbiased	0.9128	0.0553
MZ22500755	AGAP009847	AARA003926	AMIN009571	AALB000631	Ma_Ubi_weak	unbiased	unbiased	unbiased	1.0613	0.05453
MZ22500757	AGAP011030	AARA005459	AMIN004359	AALB009919	unbiased	unbiased	unbiased	unbiased	1.0585	0.0944
MZ22500758	AGAP006590	AARA008462	AMIN007805	AALB005065	Ma_Car_weak	unbiased	unbiased	Ma_Car_weak	0.8823	0.04103
MZ22500762	AGAP011545	AARA002749	AMIN008895	AALB004069	unbiased	Fe_RT_weak	unbiased	unbiased	1.1012	0.06736
MZ22500765	AGAP011724	AARA000536	AMIN008732	AALB010054	unbiased	unbiased	unbiased	Ma_RT_weak	0.9499	0.04116
MZ22500767	AGAP011875	AARA000676	AMIN008565	AALB003821	Fe_RT_weak	unbiased	unbiased	unbiased	1.4473	0.20166
MZ22500769	AGAP011765	AARA000574	AMIN004277	AALB010820	Fe_Car_weak	Fe_Car_weak	Fe_Car_weak	Fe_Car_weak	0.9918	0.05784
MZ22500772	AGAP011518	AARA002778	AMIN009061	AALB010028	Ma_RT_specific	unbiased	not_expressed	unbiased	0.9292	0.05511
MZ22500773	AGAP001102	AARA001583	AMIN002363	AALB009554	unbiased	unbiased	unbiased	unbiased	0.9722	0.05203
MZ22500775	AGAP007523	AARA008092	AMIN010404	AALB005170	Fe_RT_weak	Fe_RT_weak	unbiased	unbiased	0.8531	0.00956
MZ22500776	AGAP005216	AARA002967	AMIN010734	AALB004362	Ma_RT_weak	Ma_RT_weak	unbiased	unbiased	1.0392	0.08633
MZ22500779	AGAP001035	AARA011772	AMIN005368	AALB007729	Fe_RT_weak	Fe_RT_weak	unbiased	Fe_RT_weak	1.1045	0.09367
MZ22500781	AGAP007034	AARA009352	AMIN011107	AALB005026	not_expressed	unbiased	unbiased	unbiased	1.1178	0.10481
MZ22500783	AGAP001947	AARA006992	AMIN000506	AALB002719	unbiased	unbiased	unbiased	unbiased	0.8451	0.02421
MZ22500784	AGAP008268	AARA011291	AMIN006021	AALB001300	unbiased	unbiased	unbiased	Fe_RT_weak	1.09	0.09455
MZ22500785	AGAP007503	AARA008073	AMIN010420	AALB005154	unbiased	unbiased	unbiased	Fe_RT_weak	1.2026	0.10019
MZ22500790	AGAP007592	AARA008156	AMIN010217	AALB006202	Ma_Car_weak	unbiased	unbiased	unbiased	0.8894	0.03839
MZ22500791	AGAP005757	AARA005666	AMIN011058	AALB006112	unbiased	Fe_Car_weak	Fe_Car_weak	Fe_Car_strong	1.0355	0.11667
MZ22500793	AGAP002529	AARA004336	AMIN002539	AALB009171	Ma_Car_weak	unbiased	unbiased	Ma_Car_weak	0.8971	0.03274
MZ22500794	AGAP001200	AARA001673	AMIN002273	AALB009378	unbiased	Ma_Car_weak	unbiased	unbiased	0.8608	0.03381
MZ22500795	AGAP011770	AARA000580	AMIN004282	AALB010826	unbiased	unbiased	unbiased	unbiased	0.8796	0.02576
MZ22500800	AGAP000332	AARA002611	AMIN005485	AALB003697	Fe_RT_weak	Fe_RT_weak	unbiased	unbiased	1.2007	0.09152
MZ22500802	AGAP000374	AARA010744	AMIN005674	AALB007013	Fe_RT_weak	Fe_RT_specific	unbiased	Fe_RT_weak	1.4542	0.13924
MZ22500804	AGAP013458	AARA000458	AMIN000704	AALB003078	Ma_Car_weak	Ma_Car_weak	unbiased	Ma_Car_weak	1.2682	0.07551
MZ22500810	AGAP005984	AARA007532	AMIN010945	AALB004889	Ma_RT_strong	unbiased	unbiased	unbiased	0.9265	0.04876
MZ22500811	AGAP002577	AARA004284	AMIN004000	AALB008211	Ma_Car_weak	unbiased	Ma_Car_weak	Ma_Car_weak	0.8476	0.01177
MZ22500814	AGAP009972	AARA003803	AMIN006753	AALB000056	unbiased	unbiased	unbiased	unbiased	0.8711	0.03692
MZ22500817	AGAP011099	AARA005529	AMIN008493	AALB010750	unbiased	unbiased	unbiased	unbiased	0.9295	0.01972
MZ22500818	AGAP028206	AARA008638	AMIN009643	AALB001716	unbiased	unbiased	unbiased	Ma_RT_specific	0.9404	0.05443
MZ22500822	AGAP008003	AARA005119	AMIN006262	AALB014018	unbiased	unbiased	unbiased	unbiased	0.8671	0.01681
MZ22500828	AGAP000363	AARA010754	AMIN005826	AALB006376	Ma_Car_weak	unbiased	unbiased	Ma_Car_weak	1.0519	0.08545
MZ22500834	AGAP002050	AARA006897	AMIN003357	AALB008103	unbiased	unbiased	unbiased	unbiased	0.8641	0.02232
MZ22500835	AGAP007810	AARA012010	AMIN006401	AALB007987	unbiased	unbiased	unbiased	unbiased	0.8139	0.0066
MZ22500838	AGAP000314	AARA010651	AMIN001955	AALB006552	unbiased	Fe_RT_specific	unbiased	Fe_RT_strong	1.086	0.10763
MZ22500839	AGAP009730	AARA004040	AMIN009471	AALB000112	unbiased	Ma_Car_weak	unbiased	unbiased	0.9184	0.03678
MZ22500840	AGAP001099	AARA006496	AMIN002364	AALB009551	unbiased	unbiased	Fe_RT_weak	unbiased	1.0171	0.04949
MZ22500841	AGAP009786	AARA003990	AMIN009520	AALB000809	Fe_Car_strong	Fe_Car_weak	unbiased	Fe_Car_weak	0.9396	0.05775
MZ22500843	AGAP004333	AARA005289	AMIN004730	AALB002327	unbiased	unbiased	unbiased	unbiased	0.9052	0.04148
MZ22500845	AGAP001733	AARA002184	AMIN003542	AALB008588	unbiased	unbiased	unbiased	unbiased	0.8968	0.02725
MZ22500846	AGAP007545	AARA008110	AMIN010385	AALB005456	unbiased	unbiased	unbiased	unbiased	0.8719	0.02161
MZ22500847	AGAP000904	AARA002590	AMIN001089	AALB006738	unbiased	unbiased	unbiased	unbiased	1.3836	0.11885
MZ22500848	AGAP003198	AARA001294	AMIN002477	AALB007154	Ma_Car_weak	unbiased	Ma_Car_weak	unbiased	0.8965	0.03106
MZ22500851	AGAP005541	AARA002273	AMIN010862	AALB005818	unbiased	Fe_RT_weak	unbiased	Fe_RT_weak	1.1935	0.15425
MZ22500853	AGAP000984	AARA011726	AMIN005462	AALB003334	not_expressed	unbiased	unbiased	unbiased	1.3282	0.11114
MZ22500854	AGAP001271	AARA001739	AMIN002211	AALB009215	unbiased	unbiased	unbiased	unbiased	1.2593	0.1755
MZ22500855	AGAP010061	AARA003712	AMIN006658	AALB007955	unbiased	unbiased	unbiased	unbiased	1.0115	0.07791
MZ22500859	AGAP003619	AARA010177	AMIN002790	AALB009283	unbiased	unbiased	unbiased	unbiased	0.8975	0.03888
MZ22500861	AGAP002879	AARA004687	AMIN003213	AALB009002	unbiased	unbiased	unbiased	unbiased	1.2142	0.15574
MZ22500862	AGAP000630	AARA010422	AMIN005569	AALB003306	unbiased	unbiased	unbiased	Ma_Car_weak	0.9481	0.03866
MZ22500864	AGAP007504	AARA008074	AMIN010419	AALB005155	Ma_RT_specific	Ma_RT_specific	unbiased	unbiased	1.0512	0.09181
MZ22500865	AGAP001748	AARA002197	AMIN000768	AALB008117	Ma_Car_specific	unbiased	unbiased	not_expressed	0.8335	0.01502
MZ22500866	AGAP008683	AARA010921	AMIN001317	AALB000929	Ma_RT_specific	Ma_RT_specific	Ma_RT_specific	Ma_RT_specific	1.0445	0
MZ22500867	AGAP012311	AARA003393	AMIN006864	AALB010835	unbiased	unbiased	unbiased	unbiased	1.1937	0.08581
MZ22500868	AGAP003083	AARA001194	AMIN003787	AALB002854	Ma_RT_specific	Ma_RT_specific	unbiased	unbiased	1.1041	0.13007
MZ22500869	AGAP000153	AARA001014	AMIN005445	AALB006648	Ma_Car_specific	unbiased	unbiased	unbiased	0.9521	0.0436
MZ22500870	AGAP002932	AARA004751	AMIN000754	AALB008194	unbiased	unbiased	unbiased	unbiased	1.0445	0.09785
MZ22500873	AGAP005527	AARA002284	AMIN010851	AALB005955	unbiased	unbiased	unbiased	unbiased	1.0151	0.08666
MZ22500875	AGAP009978	AARA003798	AMIN006748	AALB000205	Fe_RT_strong	Fe_RT_strong	Fe_RT_strong	Fe_RT_strong	0.8261	0.00915
MZ22500878	AGAP000727	AARA010213	AMIN005173	AALB006324	unbiased	unbiased	unbiased	Fe_RT_weak	1.0758	0.07473
MZ22500880	AGAP003439	AARA001519	AMIN000948	AALB002837	Fe_RT_weak	Fe_RT_weak	Fe_RT_strong	Fe_RT_weak	1.4353	0.23497
MZ22500882	AGAP012009	AARA000793	AMIN004434	AALB010117	Fe_RT_weak	unbiased	unbiased	Fe_RT_weak	0.9144	0.04517
MZ22500885	AGAP005840	AARA007668	AMIN011180	AALB005997	unbiased	unbiased	unbiased	unbiased	1.4291	0.1683
MZ22500888	AGAP007865	AARA005260	AMIN007139	AALB001353	unbiased	unbiased	unbiased	unbiased	0.9943	0.04809
MZ22500890	AGAP004335	AARA005291	AMIN004732	AALB002329	unbiased	unbiased	unbiased	unbiased	0.8586	0.02638
MZ22500892	AGAP012023	AARA000810	AMIN000074	AALB003876	Fe_RT_weak	Fe_RT_weak	unbiased	Fe_RT_weak	1.6303	0.25332
MZ22500897	AGAP001338	AARA001799	AMIN000527	AALB002693	unbiased	unbiased	unbiased	unbiased	0.9212	0.06096
MZ22500899	AGAP002828	AARA004649	AMIN000612	AALB002320	Fe_Car_strong	unbiased	unbiased	Fe_Car_weak	1.0793	0.13017
MZ22500902	AGAP011449	AARA002851	AMIN008996	AALB009809	unbiased	Ma_RT_strong	Fe_RT_weak	unbiased	0.9756	0.07051
MZ22500907	AGAP003560	AARA006621	AMIN000166	AALB002135	unbiased	unbiased	unbiased	unbiased	0.9072	0.0453
MZ22500908	AGAP007100	AARA007762	AMIN011237	AALB004549	unbiased	unbiased	not_expressed	Ma_RT_specific	0.942	0.04716
MZ22500911	AGAP002493	AARA004369	AMIN002506	AALB002545	unbiased	unbiased	unbiased	unbiased	1.1328	0.09616
MZ22500913	AGAP002578	AARA004282	AMIN003998	AALB008209	Ma_Car_weak	unbiased	unbiased	Fe_RT_specific	0.8825	0.03426
MZ22500916	AGAP008548	AARA011035	AMIN001010	AALB000400	unbiased	unbiased	unbiased	unbiased	1.0731	0.12659
MZ22500918	AGAP001205	AARA001680	AMIN002267	AALB009372	unbiased	unbiased	Fe_Car_strong	Fe_Car_strong	0.8593	0.02623
MZ22500920	AGAP011333	AARA006231	AMIN004231	AALB009824	unbiased	Fe_RT_weak	unbiased	Ma_Car_weak	0.8963	0.0752
MZ22500922	AGAP000048	AARA001130	AMIN002111	AALB003699	Fe_RT_weak	Fe_RT_weak	unbiased	Fe_RT_weak	1.4093	0.16505
MZ22500925	AGAP011214	AARA000138	AMIN008369	AALB010576	unbiased	unbiased	unbiased	unbiased	1.1135	0.13855
MZ22500926	AGAP001140	AARA001615	AMIN002327	AALB009430	Fe_RT_weak	Fe_RT_weak	Fe_RT_weak	Fe_RT_strong	1.2667	0.15292
MZ22500930	AGAP009670	AARA000950	AMIN001525	AALB000564	unbiased	unbiased	unbiased	unbiased	1.3964	0.13838
MZ22500931	AGAP000747	AARA010236	AMIN005152	AALB006469	Ma_RT_strong	Ma_RT_strong	unbiased	unbiased	1.0517	0.05536
MZ22500934	AGAP000090	AARA001081	AMIN005055	AALB006618	unbiased	unbiased	unbiased	Fe_RT_weak	1.0267	0.07011
MZ22500935	AGAP009087	AARA008626	AMIN009630	AALB001724	Ma_RT_specific	Ma_RT_specific	Ma_RT_specific	unbiased	0.9195	0.02543
MZ22500938	AGAP006339	AARA007240	AMIN008027	AALB004092	Ma_RT_weak	Fe_RT_weak	unbiased	unbiased	1.0819	0.09944
MZ22500939	AGAP011947	AARA000738	AMIN008621	AALB003773	not_expressed	not_expressed	not_expressed	unbiased	0.9447	0.05616
MZ22500942	AGAP003320	AARA001405	AMIN002847	AALB003652	Ma_Car_weak	unbiased	unbiased	Ma_Car_weak	1.0078	0.05927
MZ22500943	AGAP002983	AARA004805	AMIN003686	AALB009093	unbiased	unbiased	unbiased	unbiased	2.1957	0.26326
MZ22500944	AGAP013042	AARA010227	AMIN005161	AALB006463	unbiased	unbiased	unbiased	Ma_Car_weak	1.1686	0.11296
MZ22500945	AGAP005871	AARA007646	AMIN010003	AALB004252	Fe_RT_weak	Fe_RT_weak	Ma_RT_weak	Fe_RT_strong	0.9622	0.06133
MZ22500949	AGAP004176	AARA009620	AMIN004178	AALB009461	unbiased	unbiased	Fe_RT_weak	Fe_Car_weak	1.0079	0.08712
MZ22500951	AGAP003166	AARA001267	AMIN002766	AALB008739	Ma_RT_specific	Ma_RT_specific	Ma_RT_specific	Ma_RT_specific	1.0383	0.08454
MZ22500953	AGAP010910	AARA005385	AMIN009296	AALB010172	Fe_RT_weak	unbiased	unbiased	unbiased	0.9193	0.03669
MZ22500955	AGAP009960	AARA003816	AMIN006770	AALB000577	unbiased	Ma_RT_specific	Ma_RT_specific	unbiased	0.9305	0.06764
MZ22500956	AGAP006364	AARA000873	AMIN008001	AALB004147	unbiased	unbiased	unbiased	Ma_RT_weak	0.9684	0.07345
MZ22500957	AGAP004801	AARA006047	AMIN008141	AALB007521	unbiased	Fe_Car_weak	Fe_Car_weak	Fe_Car_weak	0.9184	0.05439
MZ22500959	AGAP005470	AARA002329	AMIN010804	AALB005213	Ma_Car_weak	unbiased	unbiased	unbiased	0.9749	0.05227
MZ22500960	AGAP012185	AARA003280	AMIN004452	AALB010615	unbiased	unbiased	unbiased	unbiased	0.9149	0.04052
MZ22500961	AGAP006143	AARA007380	AMIN010673	AALB004933	unbiased	not_expressed	unbiased	not_expressed	1.7516	0.25885
MZ22500962	AGAP002829	AARA004650	AMIN000611	AALB002321	unbiased	Fe_RT_weak	unbiased	Fe_RT_weak	1.1882	0.12336
MZ22500967	AGAP011124	AARA005562	AMIN008457	AALB009033	Fe_RT_weak	Fe_RT_strong	Fe_RT_strong	Fe_RT_weak	1.3242	0.14966
MZ22500969	AGAP013298	AARA004100	AMIN003569	AALB009475	not_expressed	not_expressed	not_expressed	not_expressed	1.0981	0.0655
MZ22500974	AGAP001877	AARA007050	AMIN000446	AALB008839	unbiased	unbiased	Fe_RT_weak	Fe_RT_weak	1.3277	0.14492
MZ22500975	AGAP001907	AARA007024	AMIN000470	AALB008817	unbiased	unbiased	unbiased	unbiased	1.0712	0.09124
MZ22500977	AGAP003282	AARA001360	AMIN000360	AALB009495	Fe_RT_weak	Fe_RT_weak	unbiased	Fe_RT_strong	1.1534	0.10381
MZ22500978	AGAP008137	AARA004991	AMIN006139	AALB001509	unbiased	unbiased	unbiased	unbiased	0.9411	0.04455
MZ22500979	AGAP001455	AARA001913	AMIN000522	AALB002698	unbiased	unbiased	unbiased	unbiased	1.7263	0.2802
MZ22500980	AGAP009041	AARA006546	AMIN001037	AALB000362	unbiased	unbiased	unbiased	unbiased	1.6738	0.2083
MZ22500982	AGAP006990	AARA009307	AMIN009976	AALB005558	Fe_RT_weak	Fe_RT_weak	Fe_RT_weak	Fe_RT_weak	1.252	0.11399
MZ22500984	AGAP005490	AARA002317	AMIN010819	AALB005095	Ma_Car_weak	unbiased	Ma_Car_weak	Ma_Car_weak	0.9133	0.03381
MZ22500986	AGAP008752	AARA010845	AMIN001391	AALB001083	not_expressed	unbiased	unbiased	Fe_Car_specific	1.1212	0.11183
MZ22500991	AGAP007237	AARA007869	AMIN010611	AALB004203	unbiased	unbiased	unbiased	unbiased	0.9657	0.05056
MZ22500992	AGAP001979	AARA006965	AMIN003286	AALB002183	unbiased	unbiased	unbiased	unbiased	1.0655	0.13932
MZ22500996	AGAP010261	AARA007187	AMIN001130	AALB001275	Ma_RT_weak	Ma_RT_weak	unbiased	Ma_Car_weak	0.9245	0.0371
MZ22500997	AGAP007925	AARA005196	AMIN006429	AALB001405	unbiased	unbiased	unbiased	unbiased	0.9995	0.03352
MZ22501001	AGAP004430	AARA005376	AMIN004811	AALB003497	Fe_RT_weak	unbiased	unbiased	unbiased	1.2076	0.13782
MZ22501004	AGAP006638	AARA008516	AMIN007757	AALB004831	unbiased	Ma_Ubi_strong	unbiased	Ma_Car_weak	0.9102	0.04666
MZ22501006	AGAP003187	AARA001285	AMIN002487	AALB007162	Fe_RT_weak	Fe_RT_strong	Fe_RT_weak	Fe_RT_weak	0.9402	0.06608
MZ22501007	AGAP012163	AARA003258	AMIN008327	AALB010808	unbiased	unbiased	unbiased	unbiased	0.9427	0.06049
MZ22501008	AGAP010956	AARA005415	AMIN009252	AALB006986	Fe_RT_weak	Fe_RT_weak	unbiased	unbiased	1.1232	0.10294
MZ22501009	AGAP006994	AARA009310	AMIN009979	AALB005561	Ma_RT_weak	Ma_RT_weak	unbiased	unbiased	0.9981	0.06786
MZ22501013	AGAP010551	AARA000079	AMIN001293	AALB010223	unbiased	unbiased	unbiased	unbiased	1.0501	0.09222
MZ22501014	AGAP000870	AARA002559	AMIN002048	AALB006724	Fe_RT_strong	Fe_RT_strong	Fe_RT_strong	Fe_RT_strong	0.9012	0.0244
MZ22501018	AGAP009655	AARA011401	AMIN001512	AALB001320	Fe_RT_weak	Fe_RT_weak	Fe_RT_weak	Fe_RT_weak	1.0435	0.07956
MZ22501026	AGAP011728	AARA000541	AMIN008728	AALB007103	unbiased	unbiased	unbiased	unbiased	1.0039	0.05611
MZ22501028	AGAP007490	AARA008060	AMIN010431	AALB005141	unbiased	unbiased	unbiased	Ma_RT_specific	0.9171	0.02765
MZ22501033	AGAP010737	AARA008969	AMIN009227	AALB010165	Fe_Ubi_weak	unbiased	unbiased	unbiased	1.1146	0.10772
MZ22501036	AGAP002310	AARA004571	AMIN004590	AALB008630	unbiased	unbiased	unbiased	unbiased	0.8719	0.02804
MZ22501038	AGAP009915	AARA003865	AMIN006825	AALB000373	Ma_Car_weak	unbiased	unbiased	unbiased	1.3351	0.19003
MZ22501039	AGAP000898	AARA002585	AMIN001081	AALB006719	Fe_RT_weak	Fe_RT_strong	Fe_RT_weak	Fe_RT_weak	1.5302	0.20146
MZ22501040	AGAP007452	AARA008043	AMIN010448	AALB005122	Fe_RT_weak	Fe_RT_specific	Fe_RT_strong	Fe_RT_weak	1.4836	0.1905
MZ22501042	AGAP012368	AARA003445	AMIN008954	AALB003782	unbiased	Fe_RT_weak	unbiased	unbiased	1.0251	0.08177
MZ22501043	AGAP002032	AARA006911	AMIN003340	AALB008881	unbiased	unbiased	unbiased	unbiased	0.8684	0.01687
MZ22501044	AGAP001283	AARA001749	AMIN002201	AALB009205	unbiased	unbiased	unbiased	Fe_Car_weak	0.9414	0.08064
MZ22501046	AGAP011340	AARA006223	AMIN004238	AALB004028	unbiased	unbiased	unbiased	unbiased	0.8711	0.02954
MZ22501049	AGAP009295	AARA000297	AMIN001736	AALB000296	Ma_RT_weak	Ma_RT_weak	Ma_RT_weak	Ma_RT_specific	0.9356	0.06101
MZ22501052	AGAP004302	AARA011497	AMIN002996	AALB003175	Ma_RT_specific	unbiased	unbiased	unbiased	1.198	0.11097
MZ22501053	AGAP000126	AARA001044	AMIN005090	AALB006824	unbiased	unbiased	unbiased	unbiased	1.2488	0.13569
MZ22501057	AGAP007099	AARA007759	AMIN011235	AALB004551	not_expressed	not_expressed	not_expressed	Ma_RT_specific	1.0203	0.06874
MZ22501058	AGAP011520	AARA002775	AMIN009063	AALB010026	Fe_RT_weak	Fe_RT_weak	Fe_RT_weak	Fe_RT_strong	1.6755	0.19386
MZ22501059	AGAP008026	AARA005101	AMIN006243	AALB000300	unbiased	Fe_RT_weak	unbiased	Fe_RT_weak	1.285	0.15544
MZ22501064	AGAP009261	AARA000330	AMIN001707	AALB001039	unbiased	unbiased	unbiased	Fe_RT_weak	0.9359	0.04116
MZ22501066	AGAP005943	AARA007576	AMIN010986	AALB005927	unbiased	unbiased	unbiased	unbiased	1.0093	0.03964
MZ22501068	AGAP006083	AARA007441	AMIN009923	AALB006159	Fe_RT_weak	Fe_RT_weak	unbiased	unbiased	0.9079	0.04021
MZ22501069	AGAP000139	AARA001029	AMIN005456	AALB006782	unbiased	unbiased	unbiased	unbiased	1.1085	0.10927
MZ22501071	AGAP008098	AARA005029	AMIN006174	AALB000985	unbiased	unbiased	unbiased	unbiased	1.2369	0.11751
MZ22501072	AGAP011138	AARA005579	AMIN008440	AALB010782	unbiased	Fe_RT_weak	unbiased	unbiased	1.0164	0.06346
MZ22501074	AGAP006645	AARA008521	AMIN007752	AALB004825	unbiased	unbiased	unbiased	unbiased	1.0736	0.11535
MZ22501080	AGAP002329	AARA004545	AMIN004613	AALB002105	unbiased	Ma_Car_weak	unbiased	Ma_Car_weak	1.0228	0.07327
MZ22501082	AGAP006048	AARA007472	AMIN007525	AALB004437	unbiased	Fe_Car_weak	Fe_Car_weak	unbiased	1.0942	0.12761
MZ22501086	AGAP003679	AARA010113	AMIN004037	AALB010870	Ma_RT_specific	Ma_RT_specific	Ma_RT_weak	Ma_RT_specific	0.9174	0.02542
MZ22501087	AGAP011355	AARA006209	AMIN004253	AALB004013	Ma_Car_weak	Ma_Car_weak	unbiased	unbiased	0.8745	0.02827
MZ22501090	AGAP002379	AARA004498	AMIN004675	AALB002744	unbiased	Fe_Car_weak	unbiased	Fe_Car_weak	1.211	0.17319
MZ22501096	AGAP002949	AARA004768	AMIN003167	AALB002758	Fe_RT_weak	unbiased	unbiased	Fe_RT_strong	1.1555	0.11845
MZ22501098	AGAP008471	AARA011103	AMIN009810	AALB000603	not_expressed	unbiased	unbiased	Ma_Car_weak	1.0878	0.10717
MZ22501100	AGAP001739	AARA002187	AMIN003546	AALB008593	unbiased	unbiased	unbiased	Ma_RT_strong	1.0842	0.0836
MZ22501109	AGAP010028	AARA003746	AMIN006700	AALB000874	Fe_RT_strong	unbiased	unbiased	Fe_RT_weak	0.9619	0.06798
MZ22501111	AGAP001090	AARA011780	AMIN005770	AALB006911	unbiased	unbiased	unbiased	unbiased	1.054	0.09845
MZ22501118	AGAP008193	AARA004938	AMIN006087	AALB000483	Fe_Car_weak	Fe_Car_weak	Fe_Car_specific	Fe_Car_strong	0.9565	0.06371
MZ22501119	AGAP002262	AARA006676	AMIN000142	AALB008353	unbiased	Ma_RT_specific	unbiased	unbiased	0.907	0.04481
MZ22501124	AGAP008350	AARA011212	AMIN005949	AALB001466	unbiased	unbiased	unbiased	Ma_RT_specific	0.9172	0.03286
MZ22501132	AGAP006811	AARA009144	AMIN010033	AALB005292	unbiased	unbiased	unbiased	unbiased	1.5665	0.24117
MZ22501133	AGAP009158	AARA008696	AMIN009700	AALB000652	unbiased	unbiased	unbiased	Ma_Car_weak	1.0558	0.07794
MZ22501136	AGAP002321	AARA004559	AMIN004602	AALB002118	unbiased	unbiased	unbiased	unbiased	1.4639	0.16631
MZ22501137	AGAP011944	AARA000735	AMIN008618	AALB003770	unbiased	unbiased	unbiased	unbiased	0.9745	0.06505
MZ22501140	AGAP000545	AARA010501	AMIN005298	AALB006524	Fe_Car_weak	unbiased	Fe_Car_weak	Fe_Car_weak	0.9636	0.05772
MZ22501143	AGAP001533	AARA001979	AMIN002424	AALB009146	unbiased	unbiased	unbiased	unbiased	0.9694	0.06627
MZ22501145	AGAP010055	AARA003717	AMIN006674	AALB007968	Fe_RT_weak	Fe_RT_weak	Fe_RT_weak	Fe_RT_weak	1.2516	0.16638
MZ22501146	AGAP006042	AARA007479	AMIN007529	AALB004767	unbiased	unbiased	unbiased	unbiased	0.9048	0.14356
MZ22501147	AGAP009180	AARA008719	AMIN009723	AALB000019	unbiased	unbiased	unbiased	unbiased	0.9341	0.03116
MZ22501148	AGAP001362	AARA001818	AMIN000545	AALB003013	Fe_RT_weak	unbiased	Fe_RT_weak	unbiased	0.9677	0.07264
MZ22501151	AGAP007368	AARA007981	AMIN010505	AALB004543	unbiased	unbiased	not_expressed	not_expressed	0.941	0.06555
MZ22501153	AGAP005700	AARA005717	AMIN010148	AALB005350	unbiased	unbiased	unbiased	unbiased	0.8722	0.03331
MZ22501154	AGAP004870	AARA006096	AMIN011650	AALB004726	unbiased	Fe_RT_weak	unbiased	unbiased	0.949	0.06207
MZ22501155	AGAP003506	AARA001575	AMIN000890	AALB007212	unbiased	unbiased	unbiased	unbiased	0.8838	0.03393
MZ22501157	AGAP004345	AARA005303	AMIN004744	AALB003599	unbiased	unbiased	unbiased	Fe_RT_weak	2.0647	0.35343
MZ22501158	AGAP000686	AARA010371	AMIN005856	AALB006943	not_expressed	unbiased	unbiased	unbiased	0.9542	0.04344
MZ22501159	AGAP009167	AARA008708	AMIN009714	AALB000354	unbiased	Fe_RT_weak	unbiased	unbiased	1.1116	0.12928
MZ22501160	AGAP000095	AARA001076	AMIN005058	AALB006614	unbiased	unbiased	unbiased	unbiased	0.9441	0.04257
MZ22501162	AGAP000141	AARA001028	AMIN005455	AALB006781	unbiased	Fe_RT_weak	unbiased	Fe_RT_strong	1.4503	0.226
MZ22501163	AGAP004761	AARA006014	AMIN008102	AALB007474	Ma_RT_specific	Ma_RT_weak	unbiased	unbiased	0.9665	0.07297
MZ22501166	AGAP005917	AARA007602	AMIN010709	AALB004452	Fe_RT_strong	Fe_RT_strong	Fe_RT_strong	Fe_RT_weak	1.1757	0.14252
MZ22501168	AGAP012343	AARA003421	AMIN009355	AALB009973	Ma_Car_weak	unbiased	unbiased	unbiased	0.9325	0.05807
MZ22501169	AGAP005546	AARA002270	AMIN010866	AALB005822	Ma_RT_specific	unbiased	unbiased	Ma_Car_weak	1.0345	0.06636
MZ22501172	AGAP005906	AARA007612	AMIN010717	AALB004443	unbiased	unbiased	unbiased	unbiased	0.9767	0.0564
MZ22501173	AGAP001386	AARA001836	AMIN000564	AALB009264	Fe_RT_weak	Fe_RT_weak	unbiased	Fe_RT_weak	1.324	0.17413
MZ22501175	AGAP004852	AARA006110	AMIN011636	AALB003226	unbiased	unbiased	unbiased	unbiased	0.906	0.04178
MZ22501176	AGAP007917	AARA005209	AMIN007083	AALB001427	unbiased	unbiased	unbiased	unbiased	0.991	0.0618
MZ22501177	AGAP004244	AARA011555	AMIN004106	AALB008553	unbiased	Fe_RT_weak	unbiased	unbiased	0.9364	0.04235
MZ22501179	AGAP006046	AARA007474	AMIN007526	AALB004438	unbiased	Ma_RT_weak	unbiased	unbiased	0.8742	0.03002
MZ22501182	AGAP027984	AARA011130	AMIN009792	AALB001756	unbiased	unbiased	unbiased	unbiased	1.37	0.1781
MZ22501183	AGAP001150	AARA001622	AMIN002319	AALB009424	unbiased	unbiased	unbiased	unbiased	0.9296	0.05554
MZ22501185	AGAP004774	AARA006022	AMIN008112	AALB007467	unbiased	unbiased	unbiased	Fe_RT_weak	1.226	0.02819
MZ22501188	AGAP002318	AARA004562	AMIN004599	AALB002121	unbiased	unbiased	unbiased	unbiased	0.8764	0.04497
MZ22501189	AGAP009043	AARA006543	AMIN001040	AALB001059	Fe_RT_weak	Fe_RT_weak	Fe_RT_weak	Fe_RT_weak	0.9775	0.07172
MZ22501193	AGAP002414	AARA004462	AMIN002679	AALB002267	unbiased	unbiased	unbiased	unbiased	0.9552	0.05912
MZ22501199	AGAP007133	AARA007796	AMIN011274	AALB004109	unbiased	unbiased	unbiased	Ma_Car_weak	1.0527	0.06561
MZ22501201	AGAP011199	AARA000124	AMIN008379	AALB010566	unbiased	unbiased	unbiased	unbiased	0.9222	0.05267
MZ22501207	AGAP008698	AARA010902	AMIN001337	AALB000947	Fe_RT_weak	Fe_RT_weak	unbiased	Fe_RT_weak	0.9884	0.06793
MZ22501210	AGAP000550	AARA010496	AMIN005303	AALB006494	unbiased	unbiased	unbiased	Fe_Car_weak	0.8862	0.04876
MZ22501211	AGAP000205	AARA010539	AMIN002032	AALB006357	unbiased	unbiased	Fe_RT_strong	unbiased	1.2322	0.07614
MZ22501213	AGAP002091	AARA006853	AMIN000649	AALB009287	Fe_Car_strong	unbiased	unbiased	Fe_Car_strong	0.9147	0.05425
MZ22501214	AGAP012134	AARA003234	AMIN008306	AALB004042	unbiased	unbiased	unbiased	Fe_RT_weak	1.0522	0.09932
MZ22501215	AGAP009450	AARA000188	AMIN001834	AALB001644	not_expressed	not_expressed	not_expressed	not_expressed	1.0488	0.07109
MZ22501217	AGAP002371	AARA004505	AMIN004682	AALB002061	unbiased	unbiased	unbiased	unbiased	0.9821	0.05625
MZ22501218	AGAP007815	AARA012013	AMIN006404	AALB001167	Ma_RT_strong	Ma_RT_weak	unbiased	unbiased	1.0231	0.07141
MZ22501221	AGAP009820	AARA003950	AMIN009549	AALB001571	not_expressed	not_expressed	unbiased	unbiased	1.0441	0.05951
MZ22501223	AGAP000007	AARA010317	AMIN005345	AALB006601	unbiased	unbiased	unbiased	unbiased	0.8983	0.03113
MZ22501224	AGAP001916	AARA007015	AMIN000480	AALB008810	Ma_Car_weak	unbiased	unbiased	unbiased	0.9877	0.08048
MZ22501228	AGAP004703	AARA000359	AMIN007482	AALB007477	Fe_RT_weak	Fe_RT_weak	Fe_RT_weak	Fe_RT_weak	0.8687	0.02348
MZ22501233	AGAP004140	AARA009660	AMIN004219	AALB002162	unbiased	unbiased	unbiased	Fe_RT_weak	0.9718	0.05963
MZ22501235	AGAP007989	AARA005134	AMIN006275	AALB010234	Fe_RT_weak	Fe_RT_weak	unbiased	Fe_RT_weak	1.4538	0.16152
MZ22501236	AGAP003513	AARA006572	AMIN000884	AALB007223	Ma_Car_weak	Ma_Car_weak	Ma_Car_weak	Ma_RT_strong	0.9262	0.055
MZ22501238	AGAP004854	AARA006109	AMIN011637	AALB003225	unbiased	unbiased	Fe_RT_weak	Fe_RT_weak	0.9326	0.07363
MZ22501243	AGAP011347	AARA006218	AMIN004244	AALB004021	unbiased	Fe_RT_strong	unbiased	unbiased	1.0261	0.10764
MZ22501244	AGAP007129	AARA007792	AMIN011269	AALB004114	unbiased	unbiased	Fe_RT_weak	unbiased	1.5157	0.19979
MZ22501250	AGAP007181	AARA007830	AMIN010642	AALB005656	unbiased	unbiased	unbiased	unbiased	1.0208	0.09189
MZ22501257	AGAP004209	AARA011594	AMIN004145	AALB009004	Ma_Car_weak	unbiased	unbiased	Ma_Car_weak	1.0044	0.10116
MZ22501258	AGAP000054	AARA001124	AMIN002119	AALB007748	unbiased	unbiased	unbiased	unbiased	1.0076	0.11722
MZ22501259	AGAP004671	AARA006495	AMIN006465	AALB007533	Fe_RT_weak	Fe_RT_strong	Fe_RT_strong	Fe_RT_weak	1.4421	0.10865
MZ22501260	AGAP009435	AARA000200	AMIN001822	AALB001654	Ma_RT_weak	unbiased	unbiased	unbiased	0.9837	0.07167
MZ22501266	AGAP011351	AARA006213	AMIN004249	AALB004017	unbiased	unbiased	unbiased	unbiased	0.8779	0.02495
MZ22501272	AGAP005789	AARA007723	AMIN009998	AALB004247	Fe_RT_weak	Fe_RT_weak	Fe_Car_weak	Fe_Car_weak	1.1852	0.16289
MZ22501273	AGAP001929	AARA007008	AMIN000487	AALB002728	Fe_RT_weak	Fe_RT_strong	Fe_RT_strong	Fe_RT_weak	1.0164	0.08086
MZ22501275	AGAP001716	AARA002166	AMIN003524	AALB003580	Ma_Ubi_weak	unbiased	unbiased	Ma_Car_weak	0.973	0.07853
MZ22501276	AGAP001427	AARA001879	AMIN003241	AALB008297	Ma_Car_weak	unbiased	unbiased	Fe_RT_weak	1.3028	0.20898
MZ22501278	AGAP007585	AARA008147	AMIN010224	AALB006209	unbiased	unbiased	unbiased	Ma_Car_weak	0.9229	0.02107
MZ22501280	AGAP013139	AARA011535	AMIN004087	AALB008091	unbiased	unbiased	unbiased	unbiased	1.4437	0.18494
MZ22501281	AGAP011336	AARA006227	AMIN004235	AALB010461	unbiased	unbiased	unbiased	unbiased	1.02	0.07118
MZ22501283	AGAP010418	AARA005906	AMIN004972	AALB007571	Ma_RT_weak	Ma_RT_weak	unbiased	unbiased	0.9068	0.0328
MZ22501289	AGAP007999	AARA005125	AMIN006266	AALB000342	Fe_RT_strong	Fe_RT_weak	Fe_RT_strong	Fe_RT_strong	1.0697	0.07528
MZ22501295	AGAP013124	AARA001997	AMIN002440	AALB009127	unbiased	unbiased	unbiased	Ma_RT_strong	1.123	0.06842
MZ22501296	AGAP012070	AARA003177	AMIN008244	AALB010145	Ma_Ubi_weak	unbiased	unbiased	Ma_Car_weak	0.9979	0.0349
MZ22501301	AGAP008318	AARA011249	AMIN005984	AALB000279	Ma_Car_weak	unbiased	unbiased	Ma_Car_weak	1.0257	0.09274
MZ22501303	AGAP007928	AARA005194	AMIN006430	AALB001404	Ma_Car_weak	unbiased	unbiased	Ma_Car_weak	0.9493	0
MZ22501307	AGAP013357	AARA001219	AMIN003812	AALB003437	unbiased	unbiased	unbiased	unbiased	1.335	0.31337
MZ22501310	AGAP011688	AARA000494	AMIN008770	AALB010325	unbiased	unbiased	unbiased	Fe_Car_weak	1.272	0.14739
MZ22501318	AGAP007778	AARA011974	AMIN006362	AALB008006	unbiased	unbiased	unbiased	Fe_RT_weak	0.9642	0.06308
MZ22501320	AGAP007892	AARA005233	AMIN007108	AALB001414	Fe_RT_weak	Fe_RT_weak	Fe_RT_weak	Fe_RT_weak	1.1609	0.11794
MZ22501324	AGAP011186	AARA005624	AMIN008399	AALB007030	unbiased	unbiased	unbiased	Ma_Ubi_weak	0.9196	0.03848
MZ22501326	AGAP004989	AARA003583	AMIN011471	AALB007301	Fe_RT_weak	Fe_RT_weak	unbiased	unbiased	1.0826	0.0268
MZ22501331	AGAP008324	AARA011242	AMIN005978	AALB000274	Fe_RT_weak	unbiased	unbiased	Fe_RT_weak	1.3457	0.17632
MZ22501335	AGAP002502	AARA004361	AMIN002514	AALB009438	unbiased	unbiased	Fe_Car_weak	Fe_Car_weak	1.4286	0.20844
MZ22501339	AGAP005035	AARA003146	AMIN011522	AALB007303	Fe_RT_weak	Fe_RT_weak	Fe_RT_weak	Fe_RT_weak	1.0777	0.11253
MZ22501343	AGAP011798	AARA000602	AMIN004299	AALB010517	unbiased	unbiased	unbiased	unbiased	0.8785	0.0248
MZ22501345	AGAP002539	AARA004326	AMIN002549	AALB009576	Fe_RT_weak	Fe_RT_weak	unbiased	unbiased	0.9314	0.05999
MZ22501346	AGAP000136	AARA001033	AMIN005099	AALB007697	unbiased	unbiased	unbiased	Fe_RT_specific	0.9553	0.04378
MZ22501347	AGAP003349	AARA001431	AMIN003036	AALB002574	Ma_Car_weak	unbiased	unbiased	Ma_Car_weak	0.9432	0.07065
MZ22501352	AGAP003084	AARA001195	AMIN003788	AALB002067	unbiased	unbiased	unbiased	unbiased	1.0298	none
MZ22501355	AGAP008087	AARA005040	AMIN006186	AALB006774	unbiased	unbiased	Fe_RT_weak	Fe_RT_weak	0.954	0.0859
MZ22501357	AGAP008839	AARA009380	AMIN001595	AALB000467	unbiased	unbiased	unbiased	unbiased	0.947	0.07191
MZ22501359	AGAP000124	AARA001045	AMIN005089	AALB006825	Fe_RT_weak	Fe_RT_weak	unbiased	unbiased	1.0133	0.05748
MZ22501366	AGAP001583	AARA002029	AMIN003396	AALB002467	unbiased	unbiased	unbiased	unbiased	1.0753	0.12075
MZ22501367	AGAP000384	AARA010731	AMIN005661	AALB006541	Fe_RT_weak	Fe_RT_strong	unbiased	Fe_RT_strong	1.1354	0.05908
MZ22501369	AGAP008236	AARA004899	AMIN006049	AALB000176	unbiased	Fe_RT_weak	unbiased	Fe_RT_weak	0.8992	0.04645
MZ22501370	AGAP011109	AARA005539	AMIN008481	AALB010480	Fe_RT_weak	unbiased	unbiased	Fe_RT_weak	1.2219	0.13715
MZ22501371	AGAP007417	AARA008023	AMIN010467	AALB005975	Fe_RT_weak	Fe_RT_weak	unbiased	unbiased	1.2522	0.15375
MZ22501372	AGAP004201	AARA009595	AMIN004155	AALB002550	unbiased	unbiased	unbiased	Fe_Car_strong	1.1795	0.16155
MZ22501375	AGAP007645	AARA008208	AMIN010287	AALB006251	Ma_Car_weak	Ma_Car_weak	not_expressed	unbiased	1.1574	0.10894
MZ22501377	AGAP007482	AARA008055	AMIN010437	AALB005136	Fe_RT_weak	unbiased	unbiased	unbiased	1.0027	0.07408
MZ22501385	AGAP011940	AARA000732	AMIN008615	AALB003767	unbiased	unbiased	unbiased	unbiased	0.854	0.01609
MZ22501388	AGAP002246	AARA006692	AMIN000158	AALB009646	Fe_RT_weak	Fe_RT_weak	unbiased	Fe_RT_weak	1.2392	0.14149
MZ22501390	AGAP000676	AARA010381	AMIN002042	AALB006264	unbiased	Ma_RT_strong	Fe_RT_strong	unbiased	1.8709	0.21842
MZ22501392	AGAP007763	AARA011960	AMIN006346	AALB000238	Ma_Car_weak	unbiased	unbiased	unbiased	0.9355	0.06581
MZ22501393	AGAP008379	AARA011184	AMIN005926	AALB000996	unbiased	unbiased	unbiased	unbiased	1.0069	0.07493
MZ22501396	AGAP010970	AARA005430	AMIN009238	AALB007380	unbiased	unbiased	unbiased	Ma_Car_weak	0.992	0.06637
MZ22501398	AGAP000467	AARA010658	AMIN005609	AALB006659	unbiased	unbiased	unbiased	unbiased	0.9608	0.03805
MZ22501404	AGAP010812	AARA008896	AMIN007001	AALB010450	unbiased	unbiased	unbiased	unbiased	1.3337	0.17958
MZ22501406	AGAP000195	AARA000969	AMIN005408	AALB006879	unbiased	unbiased	unbiased	unbiased	0.8268	0.00474
MZ22501407	AGAP005021	AARA003620	AMIN011505	AALB007326	unbiased	unbiased	unbiased	Fe_RT_weak	0.8339	0.01785
MZ22501410	AGAP001238	AARA001714	AMIN002234	AALB009337	unbiased	unbiased	unbiased	Ma_Car_weak	0.8605	0.01383
MZ22501411	AGAP002527	AARA004337	AMIN002537	AALB009169	unbiased	Fe_RT_weak	unbiased	Fe_Car_weak	0.8834	0.02643
MZ22501415	AGAP012385	AARA003459	AMIN008938	AALB014367	not_expressed	not_expressed	unbiased	unbiased	0.9189	0.05812
MZ22501416	AGAP006055	AARA007466	AMIN009893	AALB004432	Fe_RT_strong	Fe_RT_weak	Fe_RT_weak	Fe_RT_strong	1.3415	0.16254
MZ22501417	AGAP010218	AARA007148	AMIN001174	AALB007862	unbiased	unbiased	unbiased	unbiased	1.1016	0.11091
MZ22501431	AGAP006517	AARA008401	AMIN007852	AALB005607	unbiased	unbiased	unbiased	Fe_RT_weak	0.9716	0.07987
MZ22501433	AGAP010577	AARA000057	AMIN001314	AALB010389	Fe_RT_weak	unbiased	Fe_RT_weak	Fe_RT_weak	1.0263	0.09774
MZ22501434	AGAP011547	AARA002744	AMIN008890	AALB003872	Fe_RT_strong	Fe_Ubi_weak	unbiased	Fe_RT_weak	1.4042	0.18278
MZ22501438	AGAP007891	AARA005235	AMIN007112	AALB001417	unbiased	unbiased	unbiased	Ma_Car_weak	0.9138	0.05356
MZ22501444	AGAP009579	AARA011802	AMIN009858	AALB000515	Ma_Ubi_weak	unbiased	unbiased	unbiased	0.8639	0.02853
MZ22501449	AGAP012068	AARA003175	AMIN008243	AALB010144	unbiased	unbiased	unbiased	Ma_RT_strong	0.9326	0.03805
MZ22501455	AGAP000783	AARA010271	AMIN002022	AALB006868	Fe_RT_weak	Fe_RT_weak	Fe_RT_weak	Fe_RT_strong	1.317	0.16395
MZ22501457	AGAP004670	AARA005813	AMIN000124	AALB002911	Ma_Car_weak	unbiased	Ma_Car_weak	unbiased	1.1685	0.10629
MZ22501458	AGAP004348	AARA005304	AMIN004745	AALB003598	unbiased	unbiased	Fe_RT_weak	unbiased	1.9366	0.2799
MZ22501460	AGAP007600	AARA008162	AMIN010210	AALB006197	unbiased	unbiased	unbiased	unbiased	1.0803	0.16693
MZ22501461	AGAP005853	AARA007659	AMIN011193	AALB006005	unbiased	unbiased	unbiased	unbiased	0.9362	0.04916
MZ22501465	AGAP000360	AARA010756	AMIN005824	AALB006371	unbiased	unbiased	unbiased	unbiased	1.0073	0.03599
MZ22501467	AGAP004423	AARA005370	AMIN004806	AALB003493	unbiased	unbiased	unbiased	unbiased	0.893	0.03715
MZ22501469	AGAP011087	AARA005516	AMIN008504	AALB009890	unbiased	Ma_RT_specific	Ma_RT_specific	Ma_RT_specific	1.3041	0.17611
MZ22501474	AGAP006652	AARA008527	AMIN007747	AALB004505	Fe_RT_weak	Fe_RT_weak	Fe_RT_weak	Fe_RT_weak	1.2391	0.19446
MZ22501475	AGAP009487	AARA011893	AMIN001862	AALB001613	unbiased	Fe_RT_weak	unbiased	unbiased	0.8923	0.03931
MZ22501477	AGAP000576	AARA010469	AMIN005322	AALB006835	unbiased	unbiased	unbiased	Fe_RT_weak	0.9997	0.05261
MZ22501480	AGAP002101	AARA006843	AMIN000637	AALB002619	unbiased	Ma_Car_weak	unbiased	Ma_Car_weak	0.868	0.03728
MZ22501481	AGAP000837	AARA002520	AMIN005562	AALB006811	Fe_RT_specific	Fe_RT_specific	Fe_RT_specific	Fe_RT_specific	1.4149	0.19612
MZ22501483	AGAP011650	AARA002647	AMIN008799	AALB010298	unbiased	unbiased	Fe_Car_weak	Fe_Car_weak	1.1407	0.10215
MZ22501484	AGAP002585	AARA004276	AMIN003992	AALB002256	not_expressed	not_expressed	not_expressed	unbiased	1.4094	0.21445
MZ22501486	AGAP003995	AARA009801	AMIN002826	AALB002654	unbiased	unbiased	unbiased	Ma_Car_weak	1.0059	0.0907
MZ22501492	AGAP003374	AARA001467	AMIN003887	AALB009067	Ma_Ubi_weak	unbiased	unbiased	unbiased	1.0752	0.12586
MZ22501496	AGAP004751	AARA006005	AMIN008092	AALB010690	Fe_RT_weak	unbiased	Fe_RT_weak	unbiased	1.1363	0.10428
MZ22501500	AGAP005637	AARA002488	AMIN007572	AALB004666	not_expressed	not_expressed	unbiased	Ma_RT_specific	1.0306	0.09706
MZ22501505	AGAP003498	AARA001569	AMIN000896	AALB007206	unbiased	unbiased	unbiased	unbiased	1.0795	0.10759
MZ22501507	AGAP000019	AARA001157	AMIN002086	AALB006496	unbiased	unbiased	unbiased	unbiased	1.0403	0.05435
MZ22501510	AGAP001757	AARA002208	AMIN000759	AALB008197	unbiased	unbiased	unbiased	unbiased	1.3156	0.14216
MZ22501512	AGAP008899	AARA009452	AMIN001670	AALB001840	Ma_RT_specific	unbiased	unbiased	Ma_RT_specific	1.2477	0.13494
MZ22501513	AGAP003548	AARA006610	AMIN000848	AALB002274	unbiased	unbiased	unbiased	Fe_RT_weak	1.0667	0.11008
MZ22501515	AGAP008418	AARA011148	AMIN009776	AALB001743	Fe_RT_weak	Fe_RT_weak	unbiased	Fe_RT_weak	1.0338	0.08154
MZ22501518	AGAP002223	AARA006719	AMIN000821	AALB009669	unbiased	unbiased	unbiased	unbiased	0.9138	0.04254
MZ22501520	AGAP007332	AARA007947	AMIN010537	AALB004488	unbiased	unbiased	unbiased	unbiased	0.9736	0.08043
MZ22501521	AGAP004473	AARA006398	AMIN004852	AALB008934	Fe_RT_weak	Fe_RT_weak	Fe_RT_weak	unbiased	1.4387	0.19062
MZ22501531	AGAP000668	AARA010389	AMIN005619	AALB007704	Fe_RT_weak	Fe_RT_weak	Fe_RT_strong	Fe_RT_strong	1.2817	0.11994
MZ22501533	AGAP003279	AARA001357	AMIN000363	AALB009497	unbiased	unbiased	unbiased	unbiased	1.083	0.11115
MZ22501534	AGAP002961	AARA004777	AMIN003156	AALB008430	Fe_RT_strong	Fe_RT_weak	Fe_Ubi_weak	Fe_RT_strong	0.9823	0.07359
MZ22501541	AGAP003651	AARA010149	AMIN002581	AALB008531	Ma_Car_weak	unbiased	unbiased	Ma_Car_weak	1.1763	0.155
MZ22501545	AGAP003540	AARA006599	AMIN000860	AALB002524	unbiased	unbiased	unbiased	Ma_RT_weak	1.284	0.11757
MZ22501546	AGAP004656	AARA010201	AMIN000101	AALB002890	unbiased	unbiased	unbiased	unbiased	1.3685	0.17207
MZ22501551	AGAP008917	AARA009470	AMIN001688	AALB000255	unbiased	unbiased	unbiased	unbiased	0.9323	0.05232
MZ22501552	AGAP011586	AARA002710	AMIN008853	AALB003865	Ma_RT_weak	Ma_RT_weak	unbiased	unbiased	1.0738	0.0821
MZ22501553	AGAP007578	AARA008141	AMIN010233	AALB006215	unbiased	unbiased	unbiased	Fe_RT_weak	0.9304	0.05139
MZ22501554	AGAP007256	AARA007886	AMIN010594	AALB005523	unbiased	unbiased	unbiased	unbiased	1.143	0.0919
MZ22501559	AGAP004841	AARA006120	AMIN011625	AALB004312	Fe_RT_weak	unbiased	Fe_RT_weak	unbiased	0.912	0.03027
MZ22501561	AGAP005549	AARA002267	AMIN010867	AALB005537	Fe_RT_weak	unbiased	Fe_Ubi_weak	Fe_Car_weak	0.8212	0.00912
MZ22501565	AGAP002490	AARA004372	AMIN002503	AALB002544	unbiased	unbiased	unbiased	unbiased	1.186	0.15392
MZ22501571	AGAP012326	AARA003402	AMIN006853	AALB010495	Ma_Car_weak	unbiased	unbiased	unbiased	0.8592	0.02474
MZ22501572	AGAP003434	AARA001511	AMIN000950	AALB002842	Fe_RT_weak	Fe_RT_weak	Fe_RT_weak	Fe_RT_weak	1.0055	0.10834
MZ22501577	AGAP000776	AARA010264	AMIN005127	AALB006864	unbiased	unbiased	unbiased	unbiased	0.9485	0.04246
MZ22501578	AGAP000579	AARA010466	AMIN005319	AALB006751	unbiased	unbiased	unbiased	Fe_Car_specific	0.9657	0.06975
MZ22501582	AGAP011653	AARA002645	AMIN008797	AALB010300	unbiased	unbiased	unbiased	unbiased	0.9962	0.06509
MZ22501587	AGAP010251	AARA007176	AMIN001141	AALB001286	unbiased	unbiased	unbiased	unbiased	0.8522	0.0143
MZ22501588	AGAP007078	AARA007738	AMIN011217	AALB005936	unbiased	unbiased	unbiased	Ma_RT_specific	1.0926	0.10905
MZ22501595	AGAP000602	AARA010447	AMIN005205	AALB006529	unbiased	unbiased	unbiased	unbiased	1.0089	0.0603
MZ22501598	AGAP011292	AARA006275	AMIN009199	AALB007421	Ma_RT_weak	unbiased	unbiased	unbiased	0.8589	0.02449
MZ22501599	AGAP006909	AARA009241	AMIN007687	AALB004911	unbiased	unbiased	unbiased	unbiased	1.0976	0.15558
MZ22501609	AGAP000406	AARA010707	AMIN005692	AALB006805	Fe_RT_weak	Fe_RT_weak	Fe_RT_weak	Fe_RT_weak	0.987	0.03745
MZ22501610	AGAP001895	AARA007034	AMIN000460	AALB008825	unbiased	unbiased	Fe_RT_weak	unbiased	1.0032	0.06948
MZ22501611	AGAP007623	AARA008185	AMIN010263	AALB005404	Ma_RT_weak	Ma_RT_weak	unbiased	unbiased	0.9143	0.04309
MZ22501613	AGAP004411	AARA005361	AMIN004798	AALB003486	unbiased	Ma_Car_specific	unbiased	unbiased	1.4651	0.15665
MZ22501614	AGAP009201	AARA008738	AMIN009737	AALB001434	unbiased	unbiased	unbiased	Fe_Car_weak	1.1084	0.11827
MZ22501627	AGAP005639	AARA005759	AMIN010192	AALB004664	unbiased	unbiased	Ma_Ubi_weak	Ma_RT_specific	0.8675	0.02772
MZ22501628	AGAP010687	AARA009017	AMIN008675	AALB010730	unbiased	unbiased	unbiased	unbiased	0.9311	0.04883
MZ22501629	AGAP001021	AARA011758	AMIN005385	AALB003312	unbiased	Fe_RT_weak	unbiased	unbiased	0.9064	0.04498
MZ22501631	AGAP000708	AARA010338	AMIN005191	AALB006893	unbiased	unbiased	unbiased	unbiased	0.8507	0.00677
MZ22501632	AGAP003090	AARA001202	AMIN003794	AALB002073	Ma_RT_weak	Ma_RT_weak	unbiased	unbiased	1.0651	0.09873
MZ22501633	AGAP011187	AARA005626	AMIN008397	AALB007028	Ma_Car_weak	unbiased	unbiased	Ma_Car_weak	0.8718	0.02528
MZ22501638	AGAP002184	AARA006757	AMIN003084	AALB003411	unbiased	unbiased	unbiased	Ma_Car_weak	1.0122	0.06568
MZ22501641	AGAP002967	AARA004783	AMIN003150	AALB008153	Fe_RT_weak	Fe_RT_weak	Fe_RT_weak	Fe_RT_weak	1.1272	0.12737
MZ22501642	AGAP000869	AARA002558	AMIN002049	AALB003321	Fe_RT_weak	Fe_RT_weak	unbiased	unbiased	1.2051	0.12408
MZ22501644	AGAP008488	AARA011087	AMIN009825	AALB000782	unbiased	unbiased	unbiased	unbiased	0.9545	0.05543
MZ22501646	AGAP007712	AARA008262	AMIN010345	AALB005466	Fe_RT_weak	Fe_RT_weak	Fe_RT_weak	Fe_RT_weak	1.0497	0.05636
MZ22501648	AGAP005279	AARA011458	AMIN010770	AALB004397	unbiased	unbiased	unbiased	unbiased	1.043	0.07705
MZ22501650	AGAP002954	AARA004771	AMIN003163	AALB008515	unbiased	unbiased	unbiased	Fe_RT_weak	0.8754	0.08529
MZ22501652	AGAP010742	AARA008963	AMIN009220	AALB010159	Ma_Car_weak	unbiased	unbiased	Ma_Car_weak	0.8937	0.0381
MZ22501659	AGAP004032	AARA009776	AMIN002598	AALB003360	Ma_Car_weak	unbiased	unbiased	Ma_Car_weak	0.9057	0.03342
MZ22501660	AGAP005625	AARA005774	AMIN007558	AALB004621	unbiased	unbiased	unbiased	unbiased	1.0933	0.09796
MZ22501661	AGAP006884	AARA009208	AMIN007657	AALB005711	unbiased	unbiased	unbiased	Fe_RT_weak	1.0714	0.06918
MZ22501662	AGAP007198	AARA007841	AMIN010635	AALB005651	unbiased	unbiased	unbiased	unbiased	1.2265	0.09905
MZ22501669	AGAP003925	AARA009859	AMIN000282	AALB008761	unbiased	unbiased	unbiased	unbiased	0.9341	0.03714
MZ22501670	AGAP005731	AARA005686	AMIN011039	AALB004646	unbiased	unbiased	unbiased	unbiased	0.9492	0.03712
MZ22501671	AGAP006631	AARA008507	AMIN007765	AALB004842	unbiased	unbiased	unbiased	Ma_Car_weak	0.9969	0.07597
MZ22501674	AGAP008611	AARA010985	AMIN009139	AALB000060	unbiased	unbiased	unbiased	Fe_RT_weak	0.9902	0.04886
MZ22501675	AGAP005768	AARA005657	AMIN011065	AALB006103	not_expressed	not_expressed	unbiased	not_expressed	0.9902	0.07121
MZ22501676	AGAP001156	AARA001627	AMIN002314	AALB009418	unbiased	unbiased	unbiased	Fe_RT_weak	1.3964	0.19996
MZ22501678	AGAP001220	AARA001694	AMIN002254	AALB009358	Fe_RT_weak	Fe_RT_weak	unbiased	unbiased	1.2655	0.12606
MZ22501679	AGAP003597	AARA006655	AMIN000200	AALB008184	Fe_RT_weak	Fe_RT_weak	unbiased	unbiased	1.0131	0.02026
MZ22501681	AGAP011562	AARA002733	AMIN008877	AALB010108	unbiased	unbiased	Ma_RT_specific	Fe_RT_weak	0.8688	0.02378
MZ22501683	AGAP003944	AARA009840	AMIN000301	AALB009559	unbiased	unbiased	unbiased	Ma_Car_weak	0.9328	0.01581
MZ22501686	AGAP002287	AARA004071	AMIN004565	AALB008604	unbiased	unbiased	unbiased	Fe_RT_weak	1.0323	0.0948
MZ22501690	AGAP007180	AARA007829	AMIN010643	AALB005657	Ma_Car_weak	unbiased	unbiased	Ma_Car_weak	1.0647	0.07324
MZ22501692	AGAP000926	AARA011663	AMIN001223	AALB006485	unbiased	unbiased	unbiased	unbiased	0.9092	0.04349
MZ22501693	AGAP008939	AARA009496	AMIN009382	AALB000312	unbiased	unbiased	unbiased	unbiased	1.1323	0.1139
MZ22501698	AGAP005595	AARA005800	AMIN010903	AALB004596	Ma_Car_weak	unbiased	unbiased	Fe_RT_strong	1.197	0.1414
MZ22501701	AGAP004049	AARA009762	AMIN002613	AALB003345	unbiased	unbiased	unbiased	unbiased	1.0481	0.08761
MZ22501703	AGAP000032	AARA001148	AMIN002094	AALB006546	Ma_Ubi_weak	unbiased	unbiased	unbiased	1.1048	0.06821
MZ22501704	AGAP006115	AARA007406	AMIN009961	AALB005045	Ma_Car_weak	Ma_Car_weak	unbiased	unbiased	0.9608	0.03876
MZ22501707	AGAP004088	AARA009722	AMIN004665	AALB008540	unbiased	unbiased	unbiased	unbiased	1.4822	0.24251
MZ22501708	AGAP007978	AARA005146	AMIN006287	AALB000320	unbiased	unbiased	unbiased	unbiased	1.4854	0.18069
MZ22501713	AGAP000256	AARA010596	AMIN005679	AALB006901	not_expressed	not_expressed	Fe_RT_weak	not_expressed	0.9997	0.04834
MZ22501716	AGAP003182	AARA001280	AMIN002753	AALB008726	Ma_RT_weak	unbiased	unbiased	unbiased	1.0041	0.08368
MZ22501719	AGAP001623	AARA002066	AMIN003431	AALB008660	Fe_RT_weak	unbiased	unbiased	Fe_Car_weak	0.9217	0.0657
MZ22501721	AGAP009539	AARA011837	AMIN001916	AALB001333	Fe_Ubi_weak	Fe_Ubi_weak	Fe_Ubi_weak	Fe_RT_strong	0.997	0.0842
MZ22501727	AGAP011710	AARA000517	AMIN008752	AALB008496	Ma_Car_weak	unbiased	unbiased	Ma_Car_weak	1.2306	0.15777
MZ22501728	AGAP003711	AARA010085	AMIN004715	AALB002776	unbiased	unbiased	unbiased	unbiased	0.8591	0.04466
MZ22501730	AGAP007530	AARA008096	AMIN010400	AALB004713	Ma_Car_strong	Ma_Ubi_weak	Ma_RT_weak	unbiased	1.1991	0.14609
MZ22501731	AGAP003714	AARA010081	AMIN004719	AALB002779	Ma_Car_weak	unbiased	unbiased	Ma_Car_weak	1.0757	0.08174
MZ22501734	AGAP007106	AARA007768	AMIN011245	AALB005760	unbiased	unbiased	unbiased	unbiased	1.0565	0.07865
MZ22501735	AGAP007833	AARA012031	AMIN007210	AALB000835	Ma_RT_weak	unbiased	unbiased	unbiased	1.7484	0.25792
MZ22501740	AGAP013523	AARA001665	AMIN002281	AALB009385	not_expressed	not_expressed	not_expressed	not_expressed	1.1437	0.14659
MZ22501741	AGAP010035	AARA003742	AMIN006695	AALB000868	unbiased	unbiased	unbiased	unbiased	0.9747	0.05597
MZ22501745	AGAP008362	AARA011196	AMIN005937	AALB001479	unbiased	unbiased	unbiased	Fe_RT_weak	1.0291	0.08876
MZ22501746	AGAP011943	AARA000734	AMIN008617	AALB003769	not_expressed	not_expressed	unbiased	unbiased	1.0199	0.08838
MZ22501747	AGAP005273	AARA011465	AMIN010778	AALB004402	not_expressed	not_expressed	unbiased	unbiased	0.9144	0.0372
MZ22501748	AGAP007939	AARA005182	AMIN007068	AALB001393	Ma_Car_weak	unbiased	unbiased	unbiased	0.8654	0.01081
MZ22501749	AGAP009970	AARA003805	AMIN006755	AALB000781	unbiased	unbiased	unbiased	unbiased	0.8273	0.01417
MZ22501750	AGAP008530	AARA011055	AMIN001439	AALB000700	unbiased	unbiased	unbiased	unbiased	0.8851	0.02269
MZ22501755	AGAP005467	AARA002332	AMIN010800	AALB005211	unbiased	unbiased	unbiased	Fe_Car_weak	0.9405	0.04578
MZ22501756	AGAP000929	AARA011666	AMIN001226	AALB006891	unbiased	unbiased	unbiased	unbiased	0.8695	0.03009
MZ22501759	AGAP011089	AARA005518	AMIN008503	AALB009889	unbiased	Fe_RT_weak	unbiased	unbiased	1.1821	0.12254
MZ22501760	AGAP001935	AARA007002	AMIN000494	AALB002722	Ma_Car_weak	unbiased	unbiased	Ma_Car_weak	0.871	0.01836
MZ22501761	AGAP003676	AARA010115	AMIN004036	AALB010868	Fe_RT_weak	unbiased	unbiased	Fe_RT_weak	1.1212	0.07569
MZ22501763	AGAP006535	AARA008419	AMIN007835	AALB005237	not_expressed	unbiased	unbiased	unbiased	0.8563	0.02029
MZ22501766	AGAP005856	AARA007658	AMIN011196	AALB006008	unbiased	unbiased	unbiased	unbiased	0.9674	0.06612
MZ22501769	AGAP010242	AARA007169	AMIN001151	AALB007884	unbiased	unbiased	unbiased	Ma_Car_weak	0.9496	0.0712
MZ22501772	AGAP013081	AARA009693	AMIN003839	AALB007195	unbiased	not_expressed	not_expressed	not_expressed	1.0647	0.08177
MZ22501776	AGAP000720	AARA010323	AMIN005178	AALB007772	Ma_Car_weak	unbiased	unbiased	unbiased	0.9066	0.03755
MZ22501777	AGAP000033	AARA001147	AMIN002095	AALB006545	unbiased	unbiased	unbiased	Fe_RT_weak	0.9272	0.04704
MZ22501782	AGAP001949	AARA006989	AMIN000510	AALB002710	unbiased	unbiased	unbiased	unbiased	1.5655	0.24427
MZ22501784	AGAP001141	AARA001617	AMIN002324	AALB009428	Fe_RT_weak	Fe_RT_weak	unbiased	Fe_RT_weak	1.2089	0.12345
MZ22501785	AGAP010571	AARA000062	AMIN001309	AALB010233	unbiased	not_expressed	unbiased	unbiased	1.2791	0.17042
MZ22501789	AGAP004772	AARA006021	AMIN008111	AALB007468	Fe_RT_weak	Fe_RT_weak	unbiased	Fe_RT_weak	0.9944	0.02962
MZ22501790	AGAP004595	AARA011612	AMIN000014	AALB003526	unbiased	unbiased	unbiased	Ma_Ubi_weak	0.9066	0.04127
MZ22501796	AGAP011769	AARA000579	AMIN004281	AALB010825	Fe_RT_weak	unbiased	Fe_RT_weak	Fe_RT_weak	1.0532	0.09169
MZ22501799	AGAP005901	AARA007617	AMIN011568	AALB004772	unbiased	unbiased	unbiased	Ma_Car_weak	0.9348	0.03813
MZ22501809	AGAP006366	AARA000875	AMIN008000	AALB004145	Ma_Car_weak	unbiased	unbiased	unbiased	0.8785	0.01228
MZ22501811	AGAP006599	AARA008474	AMIN007795	AALB005054	unbiased	Fe_RT_weak	unbiased	unbiased	0.9916	0.08217
MZ22501815	AGAP002915	AARA004733	AMIN000737	AALB002385	unbiased	unbiased	unbiased	unbiased	0.8513	0.01981
MZ22501822	AGAP008654	AARA010944	AMIN009091	AALB000907	unbiased	unbiased	unbiased	Fe_Car_weak	1.5104	0.19781
MZ22501823	AGAP008354	AARA011208	AMIN005946	AALB001470	Fe_RT_weak	Fe_RT_weak	unbiased	unbiased	0.9749	0.06231
MZ22501828	AGAP000631	AARA010421	AMIN005570	AALB000590	unbiased	Fe_RT_weak	unbiased	Fe_RT_weak	1.2911	0.11756
MZ22501838	AGAP001894	AARA007035	AMIN000459	AALB008826	Fe_RT_weak	Fe_RT_weak	unbiased	Fe_RT_weak	0.9285	0.06378
MZ22501839	AGAP010207	AARA007140	AMIN001183	AALB007852	unbiased	unbiased	unbiased	Ma_RT_weak	1.1044	0.11625
MZ22501848	AGAP008288	AARA011275	AMIN006005	AALB001309	unbiased	unbiased	unbiased	unbiased	0.9886	0.05865
MZ22501849	AGAP002242	AARA006697	AMIN000162	AALB009650	unbiased	Ma_RT_weak	unbiased	Fe_RT_weak	0.8999	0.04533
MZ22501852	AGAP004742	AARA006000	AMIN007445	AALB007503	Fe_Car_weak	Fe_Car_strong	Fe_Car_strong	Fe_Car_weak	0.8434	0.01532
MZ22501856	AGAP010643	AARA009054	AMIN008705	AALB009885	unbiased	unbiased	Fe_RT_weak	Fe_RT_weak	0.8757	0.04146
MZ22501858	AGAP003715	AARA010080	AMIN004720	AALB002780	unbiased	unbiased	unbiased	unbiased	0.9747	0.06524
MZ22501860	AGAP005531	AARA002282	AMIN010853	AALB005953	unbiased	Ma_RT_weak	unbiased	unbiased	0.9362	0.05757
MZ22501863	AGAP003190	AARA001288	AMIN002483	AALB007160	Fe_RT_weak	Fe_RT_weak	Fe_RT_weak	unbiased	1.0511	0.08751
MZ22501864	AGAP005886	AARA007636	AMIN010014	AALB004264	unbiased	unbiased	unbiased	unbiased	1.0602	0.11121
MZ22501865	AGAP011888	AARA000687	AMIN008574	AALB003727	Ma_RT_weak	Ma_RT_weak	unbiased	Fe_RT_weak	0.8936	0.03454
MZ22501866	AGAP010646	AARA009051	AMIN008701	AALB010740	unbiased	unbiased	unbiased	unbiased	0.9152	0.05466
MZ22501867	AGAP004902	AARA003506	AMIN011399	AALB003223	Ma_Car_specific	unbiased	unbiased	Ma_Car_weak	0.8472	0.02562
MZ22501868	AGAP000113	AARA001057	AMIN005076	AALB006707	Ma_Car_strong	Ma_Car_weak	unbiased	unbiased	1.0082	0.13481
MZ22501873	AGAP007512	AARA008081	AMIN010413	AALB005162	unbiased	unbiased	unbiased	unbiased	0.9954	0.11031
MZ22501875	AGAP004863	AARA006103	AMIN011643	AALB004872	unbiased	Ma_RT_specific	Ma_RT_specific	Ma_RT_specific	0.8999	0
MZ22501876	AGAP010474	AARA005968	AMIN005033	AALB003991	not_expressed	unbiased	unbiased	Fe_Car_specific	0.969	0.03911
MZ22501879	AGAP000774	AARA010262	AMIN005128	AALB007782	Fe_RT_weak	unbiased	unbiased	Fe_RT_weak	1.3452	0.10171
MZ22501882	AGAP004403	AARA005352	AMIN004789	AALB003477	Ma_RT_specific	Ma_RT_specific	Ma_RT_weak	unbiased	0.8878	0.01991
MZ22501883	AGAP003145	AARA001248	AMIN004635	AALB008916	Ma_RT_specific	Ma_RT_specific	not_expressed	not_expressed	1.1684	0.09654
MZ22501887	AGAP008672	AARA010929	AMIN009079	AALB000922	Ma_RT_specific	Ma_RT_specific	Ma_RT_strong	unbiased	1.5607	0.2249
MZ22501889	AGAP009150	AARA008688	AMIN009693	AALB000644	unbiased	unbiased	unbiased	unbiased	1.0435	0.09389
MZ22501892	AGAP003638	AARA010159	AMIN002807	AALB002638	unbiased	unbiased	unbiased	unbiased	1.1636	0.14302
MZ22501896	AGAP009763	AARA004012	AMIN009501	AALB000790	not_expressed	not_expressed	Ma_RT_specific	not_expressed	1.158	0.14292
MZ22501897	AGAP005747	AARA005673	AMIN011051	AALB006117	Fe_RT_weak	Ma_Car_weak	Ma_Ubi_weak	unbiased	1.383	0.17461
MZ22501902	AGAP008085	AARA005042	AMIN006188	AALB002018	unbiased	unbiased	unbiased	Fe_Ubi_weak	0.8815	0.03586
MZ22501905	AGAP010710	AARA008996	AMIN008652	AALB010840	unbiased	unbiased	unbiased	unbiased	1.2481	0.11868
MZ22501906	AGAP001029	AARA011765	AMIN005375	AALB001403	unbiased	unbiased	Fe_RT_weak	unbiased	1.3585	0.14145
MZ22501907	AGAP002579	AARA004281	AMIN003996	AALB008207	unbiased	unbiased	unbiased	Ma_RT_specific	1.0276	0.07189
MZ22501908	AGAP000390	AARA010724	AMIN005652	AALB006838	unbiased	unbiased	unbiased	Fe_Car_weak	1.0399	0.0692
MZ22501909	AGAP001872	AARA007053	AMIN000444	AALB008841	unbiased	unbiased	unbiased	unbiased	1.0838	0.06472
MZ22501910	AGAP003827	AARA009964	AMIN003031	AALB002568	unbiased	unbiased	unbiased	unbiased	1.1523	0.10275
MZ22501911	AGAP002076	AARA006872	AMIN002458	AALB008255	Fe_Car_weak	unbiased	unbiased	Fe_Car_weak	0.849	0.00627
MZ22501913	AGAP013057	AARA011515	AMIN003015	AALB009007	Ma_Car_weak	unbiased	unbiased	Ma_Car_weak	0.8513	0.02268
MZ22501915	AGAP009256	AARA000335	AMIN001702	AALB001034	not_expressed	not_expressed	not_expressed	Ma_Car_specific	1.5522	0.23969
MZ22501916	AGAP005269	AARA011469	AMIN010780	AALB005599	unbiased	unbiased	unbiased	Fe_RT_weak	1.7134	0.28099
MZ22501918	AGAP001324	AARA001786	AMIN002164	AALB009587	unbiased	unbiased	Ma_Car_weak	Ma_Ubi_weak	1.0436	0.09297
MZ22501919	AGAP002472	AARA004392	AMIN002744	AALB009729	Fe_RT_weak	Fe_RT_weak	Fe_RT_weak	Fe_RT_weak	0.8613	0.02105
MZ22501922	AGAP004782	AARA006030	AMIN008121	AALB007505	unbiased	unbiased	unbiased	not_expressed	0.939	0.061
MZ22501924	AGAP008151	AARA004980	AMIN006124	AALB001517	unbiased	Fe_RT_weak	Fe_RT_weak	Fe_RT_weak	0.8465	0.00745
MZ22501929	AGAP001008	AARA011748	AMIN005395	AALB006883	not_expressed	unbiased	not_expressed	unbiased	1.1454	0.12274
MZ22501932	AGAP003906	AARA009886	AMIN000269	AALB008163	unbiased	unbiased	unbiased	unbiased	1.0242	0.09013
MZ22501940	AGAP001470	AARA001922	AMIN002370	AALB009258	unbiased	unbiased	Ma_RT_weak	unbiased	1.0946	0.13071
MZ22501943	AGAP002252	AARA006686	AMIN000152	AALB002664	unbiased	unbiased	unbiased	unbiased	1.0114	0.09
MZ22501944	AGAP008691	AARA010916	AMIN001323	AALB000935	unbiased	unbiased	unbiased	Fe_Car_strong	0.8575	0.02445
MZ22501951	AGAP010413	AARA005901	AMIN004969	AALB007574	unbiased	unbiased	unbiased	unbiased	1.0575	0.09612
MZ22501953	AGAP008585	AARA010999	AMIN009155	AALB000074	Ma_RT_specific	Ma_RT_strong	unbiased	unbiased	1.0067	0.10031
MZ22501954	AGAP005630	AARA005768	AMIN007565	AALB004625	unbiased	unbiased	unbiased	Fe_RT_weak	0.8174	0.00616
MZ22501956	AGAP009598	AARA011342	AMIN009843	AALB000346	Ma_Car_weak	unbiased	unbiased	Ma_Car_weak	0.8648	0.02071
MZ22501958	AGAP002618	AARA004233	AMIN003949	AALB003670	unbiased	unbiased	Fe_RT_weak	unbiased	0.9208	0.04808
MZ22501960	AGAP013190	AARA004263	AMIN003979	AALB003093	Ma_Car_weak	unbiased	unbiased	Ma_Car_weak	1.0895	0.11916
MZ22501961	AGAP003924	AARA009861	AMIN000280	AALB008173	unbiased	unbiased	unbiased	Ma_Car_weak	1.0011	0.0758
MZ22501964	AGAP010186	AARA007118	AMIN007265	AALB008776	Ma_Car_weak	unbiased	unbiased	Fe_RT_weak	0.8694	0.02466
MZ22501966	AGAP004028	AARA009780	AMIN002594	AALB003365	unbiased	unbiased	unbiased	unbiased	0.9133	0.0604
MZ22501969	AGAP007019	AARA009335	AMIN011123	AALB004635	unbiased	Ma_RT_strong	unbiased	unbiased	0.9666	0.05402
MZ22501970	AGAP013009	AARA010719	AMIN005646	AALB003316	unbiased	Fe_RT_weak	Fe_RT_specific	unbiased	1.3767	0.11289
MZ22501971	AGAP013288	AARA002003	AMIN002447	AALB003913	unbiased	unbiased	unbiased	unbiased	1.118	0.12631
MZ22501975	AGAP004873	AARA006093	AMIN011653	AALB004730	unbiased	Ma_RT_strong	unbiased	unbiased	0.967	0.07658
MZ22501976	AGAP005291	AARA011448	AMIN010759	AALB004387	Fe_RT_weak	Fe_RT_weak	unbiased	Fe_RT_weak	1.2722	0.19804
MZ22501977	AGAP000009	AARA010315	AMIN005347	AALB006336	Ma_Car_weak	unbiased	unbiased	unbiased	0.9785	0.03263
MZ22501980	AGAP011529	AARA002767	AMIN009068	AALB010153	unbiased	unbiased	unbiased	Ma_Car_weak	0.8773	0.02219
MZ22501986	AGAP009950	AARA003826	AMIN006781	AALB001313	unbiased	unbiased	unbiased	unbiased	1.3055	0.14646
MZ22501987	AGAP003162	AARA001264	AMIN002769	AALB002344	unbiased	unbiased	unbiased	unbiased	1.0195	0.07462
MZ22501991	AGAP004066	AARA009744	AMIN002630	AALB008712	Ma_Car_weak	unbiased	unbiased	Ma_Car_weak	0.8819	0.021
MZ22501992	AGAP003803	AARA009991	AMIN002899	AALB003141	Fe_RT_weak	unbiased	unbiased	unbiased	1.3467	0.19122
MZ22501996	AGAP006116	AARA007405	AMIN007733	AALB004692	unbiased	unbiased	unbiased	unbiased	0.8925	0.04227
MZ22501997	AGAP004874	AARA006091	AMIN011655	AALB004732	unbiased	unbiased	unbiased	unbiased	1.075	0.08527
MZ22502000	AGAP010367	AARA005853	AMIN006561	AALB001238	Fe_Car_specific	Fe_Ubi_weak	Fe_RT_strong	unbiased	1.0366	0.09467
MZ22502002	AGAP009060	AARA006527	AMIN001054	AALB000855	not_expressed	Fe_RT_specific	Ma_RT_specific	Ma_RT_specific	1.1474	0.11692
MZ22502005	AGAP008143	AARA004989	AMIN006137	AALB001511	unbiased	Fe_Car_weak	Fe_Car_weak	Fe_Car_weak	0.9528	0.06497
MZ22502012	AGAP011271	AARA006295	AMIN007056	AALB010537	unbiased	Fe_RT_weak	unbiased	unbiased	0.8929	0.03693
MZ22502015	AGAP002233	AARA006705	AMIN000834	AALB009658	unbiased	unbiased	unbiased	Ma_Car_weak	0.9036	0.0419
MZ22502017	AGAP001777	AARA000462	AMIN000709	AALB003454	unbiased	unbiased	unbiased	unbiased	1.0585	0.08816
MZ22502018	AGAP007631	AARA008196	AMIN010272	AALB005412	unbiased	unbiased	Fe_Car_specific	Fe_RT_weak	0.9346	0.04243
MZ22502023	AGAP004059	AARA009752	AMIN002624	AALB002798	Ma_Ubi_weak	Fe_RT_weak	unbiased	Ma_Car_weak	0.8619	0.02085
MZ22502029	AGAP005796	AARA007714	AMIN011137	AALB004474	Ma_RT_weak	Ma_RT_weak	Ma_RT_weak	Fe_RT_weak	0.9999	0.04307
MZ22502034	AGAP004303	AARA011496	AMIN002995	AALB003174	Ma_RT_specific	unbiased	unbiased	unbiased	1.0087	0.08576
MZ22502037	AGAP006340	AARA007238	AMIN008025	AALB004095	unbiased	unbiased	unbiased	Fe_RT_weak	0.9632	0.06365
MZ22502039	AGAP010700	AARA009005	AMIN008662	AALB008486	Fe_RT_weak	unbiased	Fe_RT_weak	Fe_RT_weak	0.845	0.01602
MZ22502042	AGAP011754	AARA000567	AMIN004270	AALB010676	unbiased	Ma_RT_weak	Fe_Car_weak	unbiased	0.9109	0.05389
MZ22502043	AGAP008970	AARA009532	AMIN009414	AALB000850	unbiased	Fe_RT_weak	Fe_RT_weak	Fe_RT_weak	1.1867	0.15507
MZ22502044	AGAP006062	AARA007458	AMIN009901	AALB004424	Fe_RT_weak	Fe_RT_weak	Fe_RT_strong	Fe_RT_weak	1.3878	0.18406
MZ22502046	AGAP012181	AARA003277	AMIN004449	AALB010612	Ma_Ubi_weak	unbiased	unbiased	Ma_RT_specific	1.0945	0.09965
MZ22502049	AGAP008095	AARA005031	AMIN006176	AALB000982	Ma_RT_specific	Ma_RT_specific	Ma_RT_strong	Ma_RT_specific	0.8855	0.02286
MZ22502051	AGAP004488	AARA006411	AMIN004864	AALB009605	Fe_RT_weak	Fe_RT_weak	Fe_RT_strong	Fe_RT_weak	1.0124	0.05704
MZ22502053	AGAP007888	AARA005237	AMIN007115	AALB001425	Fe_RT_weak	Fe_RT_weak	unbiased	unbiased	1.1484	0.14513
MZ22502055	AGAP010563	AARA000068	AMIN001305	AALB010239	unbiased	unbiased	Fe_Car_weak	unbiased	1.0892	0.14257
MZ22502059	AGAP009007	AARA009573	AMIN001554	AALB000546	not_expressed	not_expressed	unbiased	unbiased	0.9078	0.03656
MZ22502060	AGAP003780	AARA010012	AMIN002919	AALB002503	not_expressed	not_expressed	not_expressed	not_expressed	0.9584	0.06779
MZ22502064	AGAP003033	AARA004861	AMIN003739	AALB002413	Fe_RT_weak	Fe_RT_weak	Fe_RT_weak	Fe_RT_weak	0.8942	0.03632
MZ22502065	AGAP008081	AARA005046	AMIN006193	AALB002022	Ma_RT_specific	Ma_RT_specific	Ma_RT_specific	Ma_RT_specific	1.6872	0.27208
MZ22502070	AGAP002548	AARA004317	AMIN002556	AALB008244	Ma_RT_specific	Ma_RT_weak	unbiased	unbiased	0.9566	0.08073
MZ22502073	AGAP000990	AARA011730	AMIN005467	AALB006933	not_expressed	not_expressed	unbiased	not_expressed	1.0696	0.084
MZ22502075	AGAP000539	AARA010508	AMIN005291	AALB006444	not_expressed	not_expressed	not_expressed	not_expressed	1.3428	0.15592
MZ22502076	AGAP008184	AARA004946	AMIN006094	AALB000027	unbiased	unbiased	unbiased	unbiased	0.8495	0.02011
MZ22502077	AGAP007953	AARA005172	AMIN001947	AALB003508	Fe_RT_weak	unbiased	Fe_RT_strong	unbiased	1.1261	0.10779
MZ22502085	AGAP009736	AARA004033	AMIN009479	AALB000104	unbiased	unbiased	unbiased	unbiased	0.901	0.0436
MZ22502086	AGAP003524	AARA006583	AMIN000874	AALB007231	unbiased	unbiased	unbiased	unbiased	1.1922	0.1961
MZ22502090	AGAP001320	AARA001784	AMIN002167	AALB009584	Fe_RT_weak	Fe_RT_weak	unbiased	unbiased	0.883	0.03576
MZ22502094	AGAP005135	AARA003044	AMIN007298	AALB005890	unbiased	unbiased	unbiased	unbiased	1.16	0.1695
MZ22502097	AGAP001133	AARA001609	AMIN002333	AALB009317	unbiased	unbiased	unbiased	Fe_RT_weak	0.8717	0.02614
MZ22502098	AGAP004446	AARA006368	AMIN004826	AALB003167	unbiased	unbiased	unbiased	unbiased	1.3149	0.16088
MZ22502101	AGAP008873	AARA009418	AMIN001638	AALB001808	unbiased	unbiased	unbiased	Fe_RT_weak	1.314	0.13267
MZ22502102	AGAP008851	AARA009390	AMIN001609	AALB000476	Fe_RT_weak	unbiased	unbiased	Ma_Car_weak	1.0054	0.07204
MZ22502109	AGAP003218	AARA001312	AMIN000667	AALB009539	Fe_RT_weak	Fe_Ubi_weak	Fe_Ubi_strong	Fe_RT_weak	1.2578	0.17278
MZ22502110	AGAP010697	AARA009008	AMIN008667	AALB008483	unbiased	unbiased	unbiased	Fe_RT_weak	1.2519	0.14404
MZ22502112	AGAP013088	AARA011476	AMIN002976	AALB002866	Ma_RT_specific	Ma_RT_weak	unbiased	unbiased	1.2789	0.18315
MZ22502113	AGAP004535	AARA006455	AMIN004907	AALB002986	Fe_RT_weak	unbiased	unbiased	unbiased	0.8654	0.02387
MZ22502115	AGAP005606	AARA005790	AMIN007541	AALB004606	Fe_RT_weak	Fe_RT_weak	Fe_RT_weak	unbiased	1.304	0.17159
MZ22502117	AGAP011395	AARA002900	AMIN009317	AALB010649	Fe_RT_weak	Fe_RT_strong	unbiased	Ma_RT_weak	0.9063	0.04744
MZ22502118	AGAP011551	AARA002741	AMIN008887	AALB010115	unbiased	unbiased	unbiased	unbiased	1.0104	0.07609
MZ22502119	AGAP003446	AARA001525	AMIN000943	AALB002833	Fe_RT_weak	unbiased	Fe_RT_weak	Fe_RT_weak	1.2716	0.11957
MZ22502123	AGAP000930	AARA011669	AMIN001229	AALB006474	Fe_RT_strong	Fe_RT_strong	unbiased	Fe_RT_strong	1.1131	0.07108
MZ22502128	AGAP011932	AARA000724	AMIN008608	AALB003760	unbiased	unbiased	unbiased	Ma_Car_weak	0.9001	0.03319
MZ22502132	AGAP008412	AARA011156	AMIN009768	AALB001733	Ma_RT_strong	unbiased	Ma_RT_weak	unbiased	0.9657	0.01338
MZ22502137	AGAP006215	AARA007317	AMIN011337	AALB004678	not_expressed	not_expressed	unbiased	unbiased	1.1054	0.16268
MZ22502141	AGAP012051	AARA000837	AMIN008229	AALB010129	unbiased	unbiased	unbiased	Ma_RT_specific	1.1614	0.09942
MZ22502142	AGAP011904	AARA000699	AMIN008584	AALB003735	unbiased	unbiased	unbiased	unbiased	0.931	0.03707
MZ22502145	AGAP002573	AARA004288	AMIN004004	AALB008215	Ma_Car_weak	unbiased	unbiased	Ma_Car_weak	0.89	0.03498
MZ22502151	AGAP004447	AARA006369	AMIN004827	AALB003166	unbiased	unbiased	unbiased	Ma_RT_weak	1.3455	0.22804
MZ22502152	AGAP003992	AARA009806	AMIN002830	AALB002658	Fe_RT_weak	Fe_RT_weak	Fe_RT_weak	Fe_RT_weak	1.1028	0.14779
MZ22502157	AGAP010462	AARA005950	AMIN005017	AALB003975	unbiased	unbiased	unbiased	Fe_RT_weak	0.8614	0.02666
MZ22502158	AGAP001469	AARA001921	AMIN002369	AALB009259	unbiased	Fe_RT_weak	Fe_RT_weak	Fe_RT_weak	0.8808	0.0284
MZ22502159	AGAP009278	AARA000313	AMIN001722	AALB001452	unbiased	unbiased	unbiased	unbiased	0.8297	0.01429
MZ22502162	AGAP009975	AARA003800	AMIN006750	AALB002004	unbiased	unbiased	unbiased	unbiased	1.0117	0.05263
MZ22502166	AGAP002404	AARA004473	AMIN002668	AALB007179	Fe_RT_weak	Fe_RT_weak	Fe_RT_weak	Fe_RT_weak	0.829	0.02263
MZ22502168	AGAP003005	AARA004832	AMIN003713	AALB009115	unbiased	unbiased	unbiased	unbiased	0.9777	0.08678
MZ22502172	AGAP003292	AARA001372	AMIN000349	AALB008869	Ma_RT_strong	Ma_RT_strong	Ma_RT_strong	Ma_RT_strong	0.863	0.01746
MZ22502173	AGAP003976	AARA009820	AMIN000320	AALB007255	unbiased	unbiased	unbiased	unbiased	1.1708	0.11758
MZ22502175	AGAP012175	AARA003271	AMIN008338	AALB009906	unbiased	Fe_RT_weak	unbiased	unbiased	0.8879	0.0502
MZ22502179	AGAP007826	AARA012023	AMIN006414	AALB001153	Fe_RT_weak	Fe_RT_weak	unbiased	Fe_RT_weak	0.9697	0.07162
MZ22502185	AGAP012381	AARA003456	AMIN008945	AALB003713	Ma_Car_weak	unbiased	Fe_Car_weak	unbiased	0.9863	0.06568
MZ22502187	AGAP002424	AARA004452	AMIN002689	AALB002260	unbiased	unbiased	unbiased	unbiased	0.9199	0.05158
MZ22502189	AGAP002157	AARA006784	AMIN003108	AALB008202	Ma_Car_weak	unbiased	unbiased	unbiased	0.8469	0.02518
MZ22502192	AGAP007541	AARA008106	AMIN010391	AALB005453	Fe_RT_weak	Fe_RT_weak	Fe_RT_weak	unbiased	1.0128	0.08091
MZ22502194	AGAP008859	AARA009397	AMIN001617	AALB001785	unbiased	unbiased	unbiased	unbiased	1.3324	0.1652
MZ22502197	AGAP011691	AARA000497	AMIN008767	AALB010328	unbiased	unbiased	unbiased	unbiased	1.0366	0.01662
MZ22502198	AGAP005301	AARA011436	AMIN010745	AALB004374	Ma_Car_weak	unbiased	Ma_Ubi_weak	Ma_Car_weak	0.9313	0.05145
MZ22502199	AGAP006188	AARA007333	AMIN011321	AALB006142	Ma_RT_weak	unbiased	unbiased	unbiased	1.0097	0.06085
MZ22502200	AGAP002013	AARA006931	AMIN003324	AALB007135	unbiased	not_expressed	not_expressed	not_expressed	1.1165	0.11395
MZ22502202	AGAP004637	AARA011656	AMIN000086	AALB008266	unbiased	unbiased	Fe_RT_weak	unbiased	1.1503	0.10066
MZ22502203	AGAP000483	AARA000397	AMIN005225	AALB007706	unbiased	unbiased	unbiased	Fe_RT_weak	0.9866	0.05149
MZ22502204	AGAP010245	AARA007170	AMIN001147	AALB007888	unbiased	unbiased	unbiased	Ma_RT_specific	1.0489	0.08748
MZ22502205	AGAP012161	AARA003257	AMIN008326	AALB010807	unbiased	unbiased	unbiased	Ma_Car_weak	0.8717	0.01452
MZ22502207	AGAP001161	AARA001632	AMIN002307	AALB009412	unbiased	unbiased	unbiased	unbiased	0.8994	0.05157
MZ22502208	AGAP005042	AARA003137	AMIN011532	AALB004978	unbiased	unbiased	unbiased	unbiased	0.8964	0.04079
MZ22502210	AGAP010436	AARA005926	AMIN004993	AALB007599	unbiased	unbiased	unbiased	unbiased	0.9073	0.04707
MZ22502215	AGAP006998	AARA009314	AMIN009983	AALB005564	Ma_RT_weak	Ma_RT_weak	unbiased	unbiased	0.9042	0.03094
MZ22502218	AGAP010156	AARA003645	AMIN007232	AALB007905	Fe_Car_weak	unbiased	unbiased	unbiased	0.8565	0.02309
MZ22502219	AGAP012493	AARA012073	AMIN005790	AALB004094	Fe_RT_weak	Fe_RT_weak	Fe_RT_strong	Fe_RT_weak	1.5255	0.19656
MZ22502224	AGAP006269	AARA007265	AMIN008054	AALB003263	unbiased	unbiased	unbiased	unbiased	1.0502	0.08181
MZ22502225	AGAP007556	AARA008121	AMIN010376	AALB006234	unbiased	unbiased	Ma_Car_weak	unbiased	1.0747	0.08703
MZ22502228	AGAP003769	AARA010022	AMIN002925	AALB002495	Fe_Ubi_weak	unbiased	unbiased	Fe_Car_weak	0.8566	0.0281
MZ22502229	AGAP000211	AARA010542	AMIN005541	AALB006588	Fe_Car_weak	Fe_Car_weak	Fe_Car_strong	Fe_Car_weak	0.9647	0.05074
MZ22502239	AGAP007114	AARA007777	AMIN011254	AALB005948	Fe_RT_weak	Fe_RT_weak	unbiased	Fe_RT_weak	1.1888	0.16033
MZ22502242	AGAP007870	AARA005254	AMIN007134	AALB001358	unbiased	unbiased	Fe_RT_weak	Fe_RT_weak	0.9725	0.08205
MZ22502244	AGAP002309	AARA004572	AMIN004589	AALB008629	Ma_RT_specific	Ma_RT_specific	Ma_RT_specific	Ma_RT_specific	1.0821	0.11745
MZ22502245	AGAP007212	AARA007856	AMIN010622	AALB005568	unbiased	unbiased	unbiased	Fe_RT_weak	0.8616	0.02966
MZ22502251	AGAP004194	AARA009599	AMIN004159	AALB009444	unbiased	unbiased	unbiased	unbiased	0.8849	0.02616
MZ22502253	AGAP011337	AARA006226	AMIN004236	AALB010460	unbiased	unbiased	unbiased	unbiased	1.1428	0.10515
MZ22502255	AGAP008639	AARA010958	AMIN009105	AALB000896	unbiased	unbiased	unbiased	Fe_RT_strong	0.9574	0.06129
MZ22502259	AGAP006036	AARA007486	AMIN007534	AALB004574	Ma_RT_specific	unbiased	Fe_Car_weak	Fe_Car_weak	0.9308	0.05925
MZ22502260	AGAP009210	AARA008746	AMIN009746	AALB001428	unbiased	unbiased	Ma_RT_weak	Ma_RT_strong	1.2851	0.13621
MZ22502274	AGAP000865	AARA002555	AMIN002052	AALB006367	unbiased	unbiased	unbiased	unbiased	0.9801	0.04909
MZ22502276	AGAP007636	AARA008200	AMIN010278	AALB006244	Ma_Car_weak	unbiased	unbiased	unbiased	1.0658	0.09879
MZ22502278	AGAP000337	AARA002614	AMIN005489	AALB006078	unbiased	unbiased	unbiased	unbiased	1.0561	0.05918
MZ22502280	AGAP008347	AARA011217	AMIN005954	AALB000455	not_expressed	not_expressed	unbiased	unbiased	0.8829	0.02041
MZ22502282	AGAP007413	AARA008019	AMIN010470	AALB005977	Fe_RT_strong	Fe_RT_weak	Fe_RT_strong	Fe_RT_weak	1.3316	0.18982
MZ22502283	AGAP007682	AARA008238	AMIN010321	AALB014497	unbiased	Fe_RT_weak	unbiased	unbiased	0.9407	0.06082
MZ22502288	AGAP005374	AARA002422	AMIN007408	AALB005336	unbiased	Ma_RT_weak	Ma_RT_weak	unbiased	1.7294	0.3096
MZ22502291	AGAP011483	AARA002816	AMIN009028	AALB007112	unbiased	unbiased	unbiased	unbiased	0.9256	0.04065
MZ22502292	AGAP007118	AARA007780	AMIN011257	AALB005950	unbiased	unbiased	unbiased	Fe_Car_weak	1.3584	0.16354
MZ22502303	AGAP004249	AARA011549	AMIN004101	AALB008545	unbiased	unbiased	unbiased	Ma_Car_weak	1.1596	0.12942
MZ22502306	AGAP008636	AARA010961	AMIN009108	AALB000685	Ma_RT_weak	Ma_RT_weak	unbiased	unbiased	1.0009	0.04921
MZ22502307	AGAP005359	AARA002432	AMIN007400	AALB005723	Fe_RT_weak	Fe_RT_weak	Fe_RT_weak	Fe_RT_weak	1.0386	0.17934
MZ22502309	AGAP010574	AARA000059	AMIN001312	AALB010232	Fe_RT_strong	Fe_RT_weak	unbiased	unbiased	0.987	0.09697
MZ22502312	AGAP004524	AARA006445	AMIN004897	AALB002993	unbiased	Fe_RT_weak	unbiased	unbiased	1.0067	0.07666
MZ22502317	AGAP004154	AARA009643	AMIN004202	AALB008573	not_expressed	not_expressed	unbiased	Ma_RT_specific	0.9432	0.06796
MZ22502322	AGAP013384	AARA006895	AMIN003359	AALB008105	Fe_RT_weak	unbiased	Fe_RT_weak	Fe_RT_weak	0.9605	0.05717
MZ22502323	AGAP009933	AARA003842	AMIN006802	AALB000291	not_expressed	not_expressed	not_expressed	not_expressed	0.8754	0.01947
MZ22502324	AGAP012948	AARA004712	AMIN000716	AALB003444	not_expressed	not_expressed	not_expressed	not_expressed	1.1764	0.16808
MZ22502327	AGAP011425	AARA002873	AMIN008976	AALB010336	Fe_RT_weak	Fe_RT_weak	unbiased	Fe_RT_weak	0.9206	0.03954
MZ22502329	AGAP009929	AARA003850	AMIN006809	AALB001536	Fe_RT_weak	Fe_RT_weak	unbiased	Fe_RT_weak	0.8261	0.01314
MZ22502332	AGAP010026	AARA003747	AMIN006701	AALB000875	Fe_RT_weak	Fe_RT_weak	Fe_RT_weak	Fe_RT_strong	0.895	0.04636
MZ22502333	AGAP002832	AARA004654	AMIN000607	AALB002325	unbiased	Fe_RT_weak	unbiased	Ma_Car_weak	0.8953	0.02714
MZ22502335	AGAP007502	AARA008072	AMIN010421	AALB005153	Fe_RT_strong	Fe_RT_strong	Fe_RT_strong	Fe_RT_strong	1.1004	0.11314
MZ22502340	AGAP002665	AARA004177	AMIN003638	AALB008683	Ma_RT_weak	Ma_RT_strong	Ma_RT_weak	Fe_RT_weak	0.9641	0.05956
MZ22502343	AGAP005897	AARA007623	AMIN011564	AALB004778	Ma_RT_weak	Ma_RT_weak	unbiased	unbiased	0.853	0.01822
MZ22502344	AGAP013233	AARA009927	AMIN004044	AALB009637	Fe_RT_weak	Fe_RT_weak	unbiased	unbiased	0.91	0.05764
MZ22502348	AGAP009514	AARA011866	AMIN001886	AALB000192	unbiased	unbiased	unbiased	unbiased	0.9443	0.0466
MZ22502350	AGAP009315	AARA000283	AMIN001749	AALB001761	unbiased	unbiased	Ma_Car_weak	Ma_Car_weak	0.9596	0.0636
MZ22502351	AGAP010924	AARA005395	AMIN009306	AALB009863	unbiased	unbiased	unbiased	unbiased	0.9971	0.05896
MZ22502352	AGAP007685	AARA008242	AMIN010325	AALB005416	unbiased	unbiased	unbiased	unbiased	1.3288	0.19397
MZ22502354	AGAP001255	AARA001728	AMIN002221	AALB009325	Fe_RT_weak	Fe_RT_weak	unbiased	unbiased	1.0269	0.08872
MZ22502361	AGAP000307	AARA010641	AMIN001965	AALB006319	unbiased	unbiased	unbiased	unbiased	1.086	0.082
MZ22502365	AGAP007803	AARA012003	AMIN006394	AALB001575	unbiased	unbiased	unbiased	unbiased	1.3183	0.16728
MZ22502366	AGAP011725	AARA000537	AMIN008731	AALB007106	unbiased	unbiased	unbiased	unbiased	0.8804	0.02779
MZ22502368	AGAP001475	AARA001926	AMIN002375	AALB009255	unbiased	unbiased	unbiased	unbiased	0.9494	0.05495
MZ22502369	AGAP013332	AARA001720	AMIN002228	AALB009331	Ma_RT_specific	Ma_RT_specific	Ma_RT_specific	Ma_RT_specific	1.3302	0.23647
MZ22502371	AGAP010333	AARA003493	AMIN006525	AALB007371	unbiased	unbiased	unbiased	unbiased	1.3247	0.1841
MZ22502373	AGAP003445	AARA001524	AMIN000944	AALB002834	unbiased	unbiased	unbiased	Fe_RT_weak	1.0157	0.07164
MZ22502375	AGAP008144	AARA004988	AMIN006136	AALB001512	unbiased	unbiased	unbiased	unbiased	1.21	0.1311
MZ22502376	AGAP006616	AARA008493	AMIN007778	AALB005594	Fe_Car_weak	Ma_RT_weak	unbiased	unbiased	0.9254	0.0424
MZ22502377	AGAP000413	AARA010703	AMIN005700	AALB007797	Ma_Car_specific	Ma_Car_specific	Ma_Car_specific	Ma_Car_weak	0.9556	0.05537
MZ22502381	AGAP004545	AARA006460	AMIN004913	AALB002981	Fe_RT_specific	Fe_Ubi_weak	Fe_Ubi_weak	unbiased	1.2723	0.15732
MZ22502386	AGAP011474	AARA002830	AMIN009015	AALB008505	unbiased	unbiased	unbiased	unbiased	0.9714	0.05825
MZ22502387	AGAP011205	AARA000130	AMIN008376	AALB010571	Ma_RT_specific	unbiased	unbiased	unbiased	1.2356	0.11141
MZ22502390	AGAP028138	AARA006196	AMIN004264	AALB008473	unbiased	unbiased	unbiased	unbiased	0.9491	0.06557
MZ22502394	AGAP001082	AARA006170	AMIN005743	AALB007781	unbiased	unbiased	unbiased	unbiased	1.031	0.08615
MZ22502400	AGAP000131	AARA001036	AMIN005097	AALB006429	Ma_Car_weak	unbiased	unbiased	unbiased	0.9614	0.04544
MZ22502401	AGAP001615	AARA002057	AMIN003423	AALB002052	unbiased	unbiased	unbiased	unbiased	0.9855	0.0741
MZ22502403	AGAP000348	AARA002630	AMIN005501	AALB006404	unbiased	unbiased	Ma_Car_weak	unbiased	0.9092	0.05238
MZ22502404	AGAP012297	AARA003377	AMIN006879	AALB010083	Fe_RT_weak	Fe_RT_weak	unbiased	unbiased	1.0592	0.10342
MZ22502406	AGAP009063	AARA006523	AMIN001060	AALB000251	unbiased	Ma_Car_weak	Ma_Car_specific	unbiased	1.0236	0.08142
MZ22502407	AGAP010969	AARA005428	AMIN009240	AALB007376	Ma_Car_weak	unbiased	unbiased	unbiased	0.8788	0.03009
MZ22502408	AGAP002822	AARA004643	AMIN003664	AALB007286	unbiased	unbiased	unbiased	unbiased	1.5184	0.23545
MZ22502409	AGAP007336	AARA007951	AMIN010534	AALB004491	unbiased	unbiased	unbiased	Fe_RT_weak	0.9834	0.06637
MZ22502412	AGAP009126	AARA008668	AMIN009671	AALB001686	unbiased	unbiased	unbiased	unbiased	1.0288	0.06482
MZ22502414	AGAP010269	AARA014626	AMIN001122	AALB001283	Ma_Car_weak	unbiased	unbiased	unbiased	0.9377	0.06896
MZ22502418	AGAP004591	AARA011607	AMIN000009	AALB003533	unbiased	unbiased	unbiased	unbiased	0.976	0.04766
MZ22502421	AGAP003979	AARA009818	AMIN000322	AALB007253	unbiased	unbiased	unbiased	Fe_RT_weak	1.1748	0.14637
MZ22502426	AGAP005147	AARA003032	AMIN007310	AALB004790	Fe_RT_weak	Fe_RT_weak	Fe_RT_weak	Fe_RT_weak	2.0051	0.23746
MZ22502427	AGAP010630	AARA007221	AMIN008712	AALB009878	unbiased	unbiased	unbiased	unbiased	0.9226	0.04962
MZ22502429	AGAP009115	AARA008654	AMIN009657	AALB001700	unbiased	unbiased	unbiased	Ma_Car_weak	0.9184	0.06171
MZ22502430	AGAP004483	AARA006406	AMIN004859	AALB009610	unbiased	Fe_RT_weak	unbiased	unbiased	0.9418	0.06756
MZ22502431	AGAP008625	AARA010972	AMIN009121	AALB000971	Fe_RT_strong	Fe_RT_strong	Fe_RT_weak	Fe_RT_weak	1.0364	0.0616
MZ22502432	AGAP000532	AARA010524	AMIN005277	AALB007725	Fe_RT_weak	Fe_RT_weak	unbiased	unbiased	1.0688	0.08518
MZ22502434	AGAP001653	AARA002098	AMIN003463	AALB007742	unbiased	unbiased	unbiased	unbiased	0.8667	0.03378
MZ22502436	AGAP003389	AARA001470	AMIN003884	AALB008913	unbiased	unbiased	unbiased	unbiased	0.8923	0.03283
MZ22502437	AGAP010715	AARA008991	AMIN008647	AALB010545	unbiased	unbiased	unbiased	Fe_RT_weak	1.0356	0.09059
MZ22502439	AGAP004310	AARA011492	AMIN002991	AALB008534	Fe_RT_weak	Fe_RT_weak	unbiased	Fe_RT_weak	1.3608	0.20828
MZ22502440	AGAP012974	AARA006580	AMIN000876	AALB007230	unbiased	Fe_RT_strong	Fe_RT_specific	unbiased	1.3433	0.1911
MZ22502446	AGAP008711	AARA010890	AMIN001351	AALB000961	unbiased	unbiased	unbiased	unbiased	1.0043	0.06362
MZ22502449	AGAP010160	AARA003640	AMIN007238	AALB007900	unbiased	unbiased	unbiased	unbiased	0.8719	0.02937
MZ22502451	AGAP008473	AARA011101	AMIN009812	AALB000601	unbiased	unbiased	unbiased	unbiased	1.3518	0.2003
MZ22502452	AGAP013172	AARA010332	AMIN005183	AALB006387	not_expressed	not_expressed	unbiased	not_expressed	1.2518	0.1518
MZ22502457	AGAP008080	AARA005047	AMIN006194	AALB002023	not_expressed	not_expressed	Ma_RT_specific	not_expressed	1.0278	0.08778
MZ22502459	AGAP006817	AARA009157	AMIN010020	AALB005302	Fe_RT_weak	Fe_RT_weak	Fe_RT_weak	Fe_RT_weak	0.8433	0.0291
MZ22502460	AGAP007395	AARA008009	AMIN010480	AALB005985	unbiased	Fe_RT_weak	unbiased	Fe_RT_weak	1.2291	0.18266
MZ22502462	AGAP001496	AARA001946	AMIN002394	AALB009238	unbiased	unbiased	unbiased	unbiased	1.3808	0.193
MZ22502463	AGAP003821	AARA009969	AMIN002879	AALB003121	unbiased	unbiased	unbiased	Fe_RT_weak	1.0598	0.1285
MZ22502464	AGAP007823	AARA012019	AMIN006410	AALB001159	unbiased	Fe_RT_strong	Fe_RT_strong	Fe_RT_strong	1.104	0.11437
MZ22502470	AGAP002576	AARA011786	AMIN004001	AALB008212	unbiased	unbiased	unbiased	Fe_RT_strong	0.9759	0.06658
MZ22502471	AGAP007611	AARA008173	AMIN010251	AALB005393	unbiased	unbiased	unbiased	unbiased	0.9499	0.08073
MZ22502474	AGAP000958	AARA011699	AMIN005122	AALB007679	unbiased	unbiased	unbiased	unbiased	0.8627	0.05003
MZ22502475	AGAP001590	AARA002035	AMIN003402	AALB002460	unbiased	unbiased	unbiased	unbiased	1.1172	0.08388
MZ22502477	AGAP008635	AARA010963	AMIN009110	AALB001947	unbiased	unbiased	Fe_Ubi_weak	Fe_RT_weak	0.9533	0.05729
MZ22502480	AGAP003750	AARA010045	AMIN002943	AALB003039	not_expressed	Ma_RT_specific	not_expressed	not_expressed	0.9325	0.07705
MZ22502481	AGAP010420	AARA005908	AMIN004974	AALB007569	unbiased	unbiased	unbiased	Fe_Ubi_weak	0.8816	0.03326
MZ22502482	AGAP001227	AARA001700	AMIN002249	AALB009351	unbiased	Ma_RT_weak	unbiased	Fe_RT_weak	1.0029	0.07672
MZ22502484	AGAP007509	AARA008078	AMIN010416	AALB005158	Ma_RT_weak	Ma_RT_weak	unbiased	unbiased	1.0763	0.10725
MZ22502488	AGAP006444	AARA008323	AMIN007922	AALB005195	Ma_Car_specific	unbiased	unbiased	Ma_Car_weak	0.8564	0.02262
MZ22502497	AGAP000042	AARA001140	AMIN002103	AALB007777	Fe_RT_weak	Fe_RT_strong	unbiased	Fe_RT_weak	1.3786	0.21179
MZ22502498	AGAP004216	AARA011587	AMIN004137	AALB008389	unbiased	unbiased	unbiased	unbiased	1.6732	0.2567
MZ22502505	AGAP011746	AARA000560	AMIN004504	AALB010669	Fe_RT_weak	Fe_RT_weak	unbiased	Fe_RT_weak	1.741	0.20068
MZ22502510	AGAP007582	AARA008144	AMIN010228	AALB006212	Fe_RT_weak	Fe_RT_weak	unbiased	unbiased	1.6187	0.17401
MZ22502517	AGAP006421	AARA008299	AMIN007945	AALB005083	Fe_Car_strong	Ma_RT_strong	Fe_Car_strong	Fe_Car_strong	1.1208	0.10396
MZ22502519	AGAP004152	AARA009646	AMIN004206	AALB008575	unbiased	Ma_RT_strong	unbiased	Ma_RT_weak	1.121	0.1401
MZ22502521	AGAP004780	AARA006028	AMIN008119	AALB007827	Fe_RT_weak	Fe_RT_weak	unbiased	unbiased	1.1646	0.102
MZ22502522	AGAP002649	AARA004194	AMIN003654	AALB003514	Fe_RT_weak	Fe_RT_strong	unbiased	Fe_RT_weak	1.3069	0.22222
MZ22502523	AGAP013292	AARA001275	AMIN002758	AALB008731	unbiased	unbiased	unbiased	unbiased	1.1611	0.0919
MZ22502529	AGAP006942	AARA009267	AMIN007714	AALB004963	unbiased	Ma_RT_weak	unbiased	Fe_RT_weak	0.9003	0.03313
MZ22502532	AGAP007166	AARA007820	AMIN010653	AALB005581	Fe_RT_strong	Fe_RT_weak	Fe_Ubi_weak	Fe_RT_weak	1.0941	0.13522
MZ22502533	AGAP011207	AARA000132	AMIN008375	AALB010572	unbiased	unbiased	unbiased	Fe_RT_weak	0.9045	0.0499
MZ22502535	AGAP006939	AARA009264	AMIN007711	AALB004965	unbiased	unbiased	unbiased	unbiased	1.2313	0.1515
MZ22502538	AGAP007857	AARA005270	AMIN007145	AALB001976	unbiased	unbiased	Ma_Car_weak	Ma_Ubi_weak	1.0744	0.14848
MZ22502539	AGAP002038	AARA006908	AMIN003344	AALB008879	Fe_Car_weak	Fe_Car_weak	Fe_Car_weak	Fe_Car_weak	1.0163	0.0836
MZ22502540	AGAP011758	AARA000570	AMIN004272	AALB010366	unbiased	unbiased	unbiased	Fe_RT_strong	1.3222	0.15251
MZ22502541	AGAP000233	AARA010565	AMIN005521	AALB006510	unbiased	unbiased	unbiased	Ma_Car_weak	1.0512	0.0656
MZ22502543	AGAP001710	AARA002161	AMIN003519	AALB002432	unbiased	Fe_RT_weak	Fe_RT_weak	unbiased	1.225	0.08562
MZ22502544	AGAP001694	AARA002146	AMIN003504	AALB002447	unbiased	unbiased	unbiased	unbiased	0.8923	0.03572
MZ22502549	AGAP001117	AARA001597	AMIN002346	AALB009309	Fe_Car_specific	Fe_Car_specific	not_expressed	not_expressed	1.2026	0.07791
MZ22502550	AGAP013490	AARA001084	AMIN005052	AALB007689	Fe_Car_specific	unbiased	Fe_Car_strong	Fe_Car_strong	1.0423	0.08048
MZ22502551	AGAP005710	AARA005713	AMIN011012	AALB004150	unbiased	unbiased	unbiased	unbiased	0.9533	0.076
MZ22502554	AGAP009027	AARA006561	AMIN007173	AALB001210	Ma_RT_specific	Ma_RT_specific	Ma_RT_specific	Ma_RT_specific	1.2813	0.1549
MZ22502558	AGAP001856	AARA007069	AMIN000430	AALB002232	unbiased	unbiased	unbiased	Ma_Car_weak	1.1547	0.07975
MZ22502561	AGAP000520	AARA010535	AMIN005268	AALB006650	Ma_Car_weak	unbiased	unbiased	Ma_RT_strong	1.1448	0.12676
MZ22502564	AGAP005719	AARA005700	AMIN011026	AALB004166	Fe_RT_weak	Fe_RT_weak	Fe_RT_weak	Fe_RT_weak	1.0331	0.10153
MZ22502565	AGAP002040	AARA006905	AMIN003347	AALB008875	Ma_RT_specific	Ma_RT_strong	Ma_RT_weak	Fe_RT_weak	1.0434	0.08229
MZ22502567	AGAP013226	AARA004226	AMIN003942	AALB008384	Fe_Car_weak	Fe_Car_weak	unbiased	Fe_Car_strong	1.2806	0.15002
MZ22502568	AGAP011743	AARA000558	AMIN008713	AALB007088	Ma_RT_specific	Ma_RT_strong	Ma_RT_strong	Ma_RT_strong	1.0735	0.11385
MZ22502571	AGAP001557	AARA002006	AMIN002449	AALB003915	unbiased	unbiased	unbiased	unbiased	0.8696	0.02509
MZ22502573	AGAP010638	AARA009059	AMIN008710	AALB009880	Fe_RT_weak	unbiased	unbiased	unbiased	0.8517	0.02329
MZ22502574	AGAP006898	AARA009226	AMIN007674	AALB005695	Ma_Car_weak	unbiased	unbiased	Ma_RT_specific	0.8277	0.01683
MZ22502575	AGAP008528	AARA011056	AMIN001440	AALB007420	unbiased	unbiased	unbiased	unbiased	0.8851	0.02676
MZ22502578	AGAP003849	AARA009948	AMIN004065	AALB003085	not_expressed	unbiased	unbiased	Ma_Car_specific	1.5041	0.25594
MZ22502581	AGAP006158	AARA007366	AMIN011291	AALB005848	Ma_RT_specific	Ma_RT_strong	Ma_RT_weak	unbiased	1.3659	0.21844
MZ22502583	AGAP003402	AARA001483	AMIN003873	AALB003381	Fe_RT_weak	Fe_RT_weak	unbiased	Fe_RT_weak	1.0337	0.12819
MZ22502590	AGAP012424	AARA003488	AMIN008907	AALB003798	unbiased	unbiased	unbiased	unbiased	1.06	0.11039
MZ22502592	AGAP006997	AARA009313	AMIN009982	AALB005563	Fe_RT_weak	Fe_RT_weak	Fe_Ubi_weak	Fe_RT_weak	1.0034	0.09233
MZ22502601	AGAP010805	AARA008909	AMIN007014	AALB010557	unbiased	unbiased	unbiased	unbiased	1.0832	0.08213
MZ22502603	AGAP008072	AARA005054	AMIN006200	AALB002028	Ma_RT_specific	Ma_RT_specific	unbiased	unbiased	0.9122	0.04249
MZ22502609	AGAP011049	AARA005483	AMIN008538	AALB010598	Ma_RT_specific	Ma_RT_strong	Ma_RT_strong	Ma_Ubi_weak	1.1835	0.07549
MZ22502617	AGAP012226	AARA003312	AMIN006941	AALB009960	unbiased	Fe_RT_weak	Fe_RT_weak	Ma_Ubi_weak	0.9401	0.04352
MZ22502619	AGAP004747	AARA006002	AMIN007436	AALB009746	Fe_RT_weak	Fe_RT_weak	unbiased	Fe_RT_weak	1.0013	0.0872
MZ22502620	AGAP003845	AARA009953	AMIN004070	AALB003090	Fe_RT_weak	unbiased	unbiased	unbiased	1.1554	0.10825
MZ22502624	AGAP008152	AARA004979	AMIN006123	AALB001518	unbiased	unbiased	unbiased	Ma_RT_specific	0.9181	0.05923
MZ22502627	AGAP006235	AARA007303	AMIN011346	AALB006053	unbiased	unbiased	unbiased	unbiased	1.127	0.14232
MZ22502629	AGAP010351	AARA005841	AMIN006545	AALB001253	Fe_RT_weak	Fe_RT_weak	unbiased	unbiased	0.9948	0.06805
MZ22502631	AGAP006176	AARA007346	AMIN011309	AALB006130	unbiased	unbiased	Fe_RT_specific	unbiased	0.8798	0.03413
MZ22502632	AGAP012203	AARA003293	AMIN006961	AALB010786	unbiased	unbiased	unbiased	unbiased	1.0011	0.08131
MZ22502633	AGAP007568	AARA008133	AMIN011403	AALB006223	unbiased	unbiased	Fe_RT_weak	Fe_RT_weak	1.1988	0.12942
MZ22502635	AGAP003321	AARA001406	AMIN002848	AALB003653	Fe_Car_strong	Fe_Car_strong	Fe_Car_specific	Fe_Car_strong	0.8589	0.02428
MZ22502640	AGAP000489	AARA000391	AMIN005231	AALB006703	Fe_RT_strong	Fe_RT_specific	Fe_RT_weak	unbiased	0.9887	0.02322
MZ22502641	AGAP010883	AARA008826	AMIN009273	AALB006961	unbiased	unbiased	Fe_RT_weak	Fe_RT_weak	1.0117	0.06326
MZ22502642	AGAP012290	AARA003372	AMIN006885	AALB010079	Ma_RT_strong	Ma_RT_strong	Ma_RT_strong	Ma_RT_specific	1.1653	0.11269
MZ22502645	AGAP001106	AARA001585	AMIN002358	AALB009296	unbiased	unbiased	unbiased	unbiased	1.022	0.02731
MZ22502648	AGAP000076	AARA001097	AMIN002144	AALB006631	unbiased	unbiased	unbiased	unbiased	1.1776	0.0824
MZ22502649	AGAP011085	AARA005513	AMIN008508	AALB009892	unbiased	unbiased	unbiased	Fe_RT_weak	1.21	0.15318
MZ22502650	AGAP002434	AARA004438	AMIN002701	AALB002943	unbiased	unbiased	Ma_Ubi_weak	unbiased	1.1996	0.10199
MZ22502656	AGAP000018	AARA001158	AMIN002085	AALB006904	Fe_RT_specific	Fe_RT_specific	unbiased	Fe_RT_weak	0.9719	0.04055
MZ22502658	AGAP010083	AARA003694	AMIN006643	AALB007942	unbiased	unbiased	unbiased	unbiased	1.2447	0.15652
MZ22502661	AGAP007535	AARA008102	AMIN010395	AALB005448	unbiased	unbiased	Fe_RT_weak	unbiased	1.0181	0.11227
MZ22502662	AGAP007135	AARA007799	AMIN011277	AALB004106	unbiased	unbiased	unbiased	Ma_Car_weak	0.9321	0.04666
MZ22502668	AGAP007130	AARA007793	AMIN011270	AALB004113	unbiased	unbiased	unbiased	unbiased	0.954	0.07926
MZ22502673	AGAP001468	AARA001920	AMIN002150	AALB003546	unbiased	unbiased	unbiased	unbiased	0.9101	0.05426
MZ22502674	AGAP005251	AARA002922	AMIN011599	AALB004324	Ma_Car_weak	unbiased	Ma_Car_weak	Ma_Car_weak	0.9506	0.244
MZ22502675	AGAP008995	AARA009558	AMIN009437	AALB001887	not_expressed	not_expressed	not_expressed	not_expressed	0.9323	0.05826
MZ22502678	AGAP009571	AARA011811	AMIN009868	AALB000504	unbiased	unbiased	unbiased	Fe_RT_weak	0.8978	0.03671
MZ22502683	AGAP009515	AARA011865	AMIN001887	AALB000191	unbiased	unbiased	unbiased	unbiased	1.0892	0.11102
MZ22502684	AGAP013218	AARA011655	AMIN000084	AALB008268	unbiased	Ma_RT_strong	Ma_RT_specific	Ma_RT_specific	1.0138	0.07813
MZ22502687	AGAP001168	AARA001638	AMIN002304	AALB009409	Fe_RT_weak	Fe_RT_weak	unbiased	unbiased	1.3901	0.16072
MZ22502697	AGAP000519	AARA000361	AMIN005267	AALB007377	unbiased	unbiased	unbiased	unbiased	0.9783	0.04837
MZ22502700	AGAP004877	AARA006088	AMIN011658	AALB004735	unbiased	unbiased	unbiased	Ma_RT_strong	0.8945	0.01096
MZ22502702	AGAP000660	AARA010394	AMIN010756	AALB006768	unbiased	unbiased	unbiased	unbiased	1.5519	0.14181
MZ22502703	AGAP000130	AARA001037	AMIN005095	AALB006431	unbiased	unbiased	unbiased	Fe_Car_weak	1.1595	0.12874
MZ22502705	AGAP008389	AARA011176	AMIN005918	AALB001004	unbiased	unbiased	unbiased	unbiased	1.1218	0.16836
MZ22502706	AGAP005816	AARA007691	AMIN011159	AALB004702	unbiased	unbiased	unbiased	Ma_Car_weak	0.8387	0.013
MZ22502710	AGAP002516	AARA004349	AMIN002525	AALB009225	Fe_RT_weak	unbiased	Fe_RT_strong	unbiased	1.1963	0.12071
MZ22502711	AGAP011242	AARA000163	AMIN008356	AALB010591	unbiased	unbiased	unbiased	unbiased	1.0161	0.02692
MZ22502720	AGAP007299	AARA007918	AMIN010565	AALB005495	Fe_RT_strong	Fe_RT_strong	Fe_RT_strong	Fe_RT_strong	0.8853	0.03013
MZ22502725	AGAP007726	AARA008277	AMIN010363	AALB005432	unbiased	unbiased	unbiased	unbiased	0.9742	0.05844
MZ22502726	AGAP009995	AARA003781	AMIN006733	AALB001594	Ma_Car_weak	unbiased	Ma_Car_weak	Ma_Car_weak	0.9568	0.01325
MZ22502727	AGAP000862	AARA002551	AMIN002055	AALB006812	unbiased	unbiased	unbiased	unbiased	0.9512	0.05396
MZ22502732	AGAP003106	AARA001209	AMIN003801	AALB003061	unbiased	unbiased	unbiased	unbiased	1.0099	0.07329
MZ22502733	AGAP010183	AARA007114	AMIN007261	AALB008773	Ma_RT_weak	Ma_RT_weak	unbiased	unbiased	1.2667	0.14171
MZ22502736	AGAP002775	AARA004592	AMIN000783	AALB002276	unbiased	unbiased	Fe_RT_weak	unbiased	0.9449	0.07219
MZ22502737	AGAP002858	AARA004673	AMIN003224	AALB008986	unbiased	unbiased	unbiased	unbiased	0.8319	0.03017
MZ22502740	AGAP011393	AARA002903	AMIN009314	AALB010651	Fe_RT_weak	unbiased	Fe_RT_weak	unbiased	0.8814	0.02578
MZ22502752	AGAP007617	AARA008179	AMIN010257	AALB005398	unbiased	unbiased	Fe_RT_weak	Fe_RT_weak	0.9226	0.03729
MZ22502754	AGAP009798	AARA003977	AMIN009532	AALB000822	unbiased	Fe_Car_weak	Fe_Car_strong	Fe_Car_strong	0.9857	0.10233
MZ22502757	AGAP001160	AARA001631	AMIN002309	AALB009413	Ma_RT_specific	Ma_RT_specific	unbiased	Ma_RT_specific	1.0909	0.13233
MZ22502759	AGAP002344	AARA004528	AMIN000215	AALB009055	unbiased	unbiased	unbiased	Fe_RT_weak	0.9548	0.06468
MZ22502760	AGAP002970	AARA004786	AMIN003148	AALB008150	unbiased	unbiased	Fe_RT_weak	Fe_RT_weak	0.9657	0.07799
MZ22502765	AGAP002710	AARA004139	AMIN003606	AALB008155	unbiased	unbiased	unbiased	unbiased	1.1331	0.10592
MZ22502766	AGAP004798	AARA006044	AMIN008138	AALB007518	unbiased	unbiased	unbiased	unbiased	0.8457	0.04315
MZ22502771	AGAP003077	AARA001189	AMIN003783	AALB003927	unbiased	unbiased	unbiased	Fe_Car_weak	1.0488	0.12289
MZ22502777	AGAP002508	AARA004355	AMIN006458	AALB008785	unbiased	unbiased	unbiased	Fe_Car_specific	1.1399	0.14253
MZ22502787	AGAP001333	AARA001793	AMIN002157	AALB009596	Fe_RT_weak	Fe_RT_weak	Fe_RT_strong	Fe_RT_strong	1.0034	0.08954
MZ22502790	AGAP000232	AARA010564	AMIN005522	AALB006508	Ma_Car_specific	unbiased	Ma_Car_weak	Ma_Car_weak	1.0773	0.13383
MZ22502791	AGAP001640	AARA002085	AMIN003451	AALB003577	Fe_RT_weak	unbiased	unbiased	unbiased	1.3951	0.17243
MZ22502795	AGAP001673	AARA002116	AMIN003481	AALB008061	unbiased	unbiased	Ma_Car_specific	Ma_Ubi_specific	0.9813	0.07847
MZ22502798	AGAP003035	AARA004863	AMIN003741	AALB002415	unbiased	unbiased	Fe_RT_weak	Fe_RT_weak	0.9632	0.06653
MZ22502799	AGAP002120	AARA006820	AMIN003670	AALB009078	unbiased	unbiased	unbiased	unbiased	0.8296	0.01455
MZ22502803	AGAP009522	AARA011851	AMIN001901	AALB001870	Fe_RT_weak	unbiased	unbiased	Fe_RT_weak	1.0531	0.1038
MZ22502806	AGAP010152	AARA003646	AMIN007231	AALB007906	Fe_RT_weak	Fe_RT_weak	Fe_RT_weak	Fe_RT_weak	1.2914	0.15699
MZ22502808	AGAP012255	AARA003341	AMIN006913	AALB010177	Ma_Car_weak	unbiased	unbiased	Ma_Car_weak	0.9894	0.04774
MZ22502809	AGAP003738	AARA010056	AMIN002953	AALB003028	unbiased	unbiased	Fe_Car_weak	Fe_Car_strong	0.965	0.08034
MZ22502814	AGAP001111	AARA001591	AMIN002351	AALB009302	Ma_RT_strong	Ma_RT_strong	unbiased	unbiased	0.906	0.03289
MZ22502822	AGAP003526	AARA006585	AMIN000872	AALB007174	Fe_RT_weak	Fe_RT_weak	Fe_RT_weak	unbiased	1.1637	0.10588
MZ22502823	AGAP013266	AARA004595	AMIN000785	AALB002278	unbiased	unbiased	unbiased	unbiased	1.0357	0.09424
MZ22502829	AGAP009600	AARA011344	AMIN009841	AALB000344	Fe_RT_weak	Fe_RT_weak	unbiased	Fe_RT_weak	0.8884	0.03554
MZ22502831	AGAP000343	AARA002620	AMIN005494	AALB006820	unbiased	unbiased	unbiased	unbiased	1.0115	0.0607
MZ22502833	AGAP003989	AARA009808	AMIN002832	AALB002659	not_expressed	unbiased	unbiased	Ma_RT_strong	0.9329	0.05471
MZ22502834	AGAP004291	AARA011508	AMIN003007	AALB009014	unbiased	unbiased	unbiased	Ma_RT_weak	1.2253	0.1488
MZ22502838	AGAP002984	AARA004806	AMIN003687	AALB009094	unbiased	unbiased	unbiased	Fe_Car_weak	1.1522	0.11386
MZ22502842	AGAP004466	AARA006391	AMIN004846	AALB008939	Fe_RT_weak	unbiased	unbiased	unbiased	1.0841	0.12176
MZ22502843	AGAP000123	AARA001046	AMIN005088	AALB006419	not_expressed	Ma_RT_specific	not_expressed	not_expressed	1.0156	0.08725
MZ22502845	AGAP013001	AARA010098	AMIN004700	AALB002764	Ma_RT_weak	Ma_RT_weak	unbiased	Ma_RT_weak	0.9615	0.08568
MZ22502846	AGAP000002	AARA010211	AMIN005342	AALB003297	Fe_RT_weak	unbiased	unbiased	unbiased	1.0017	0.07285
MZ22502852	AGAP008750	AARA010848	AMIN001387	AALB001086	Ma_Ubi_specific	Ma_RT_specific	Ma_RT_specific	Ma_RT_specific	1.2778	0.19146
MZ22502854	AGAP000945	AARA011686	AMIN001230	AALB003328	unbiased	unbiased	Ma_Car_specific	unbiased	1.0584	0.11115
MZ22502858	AGAP006122	AARA007398	AMIN010689	AALB005674	unbiased	unbiased	Fe_Ubi_weak	Fe_Car_weak	1.308	0.21639
MZ22502864	AGAP006369	AARA000879	AMIN007998	AALB005922	unbiased	unbiased	unbiased	Ma_RT_specific	0.9631	0.05552
MZ22502869	AGAP004805	AARA006050	AMIN008144	AALB007524	unbiased	unbiased	unbiased	unbiased	0.8831	0.02365
MZ22502872	AGAP006186	AARA007335	AMIN011319	AALB006141	Ma_Car_weak	unbiased	unbiased	Ma_RT_strong	0.8269	0.04943
MZ22502874	AGAP008667	AARA010933	AMIN009081	AALB000921	unbiased	unbiased	unbiased	unbiased	0.8913	0.02863
MZ22502875	AGAP004832	AARA014534	AMIN011617	AALB004858	not_expressed	not_expressed	unbiased	unbiased	1.3848	0.22194
MZ22502879	AGAP002154	AARA006786	AMIN003111	AALB002252	Fe_RT_weak	unbiased	unbiased	Fe_RT_weak	1.0151	0.09188
MZ22502882	AGAP011459	AARA002840	AMIN009006	AALB009817	unbiased	unbiased	Ma_Car_weak	unbiased	0.9386	0.05744
MZ22502883	AGAP005191	AARA002991	AMIN007351	AALB014321	Fe_RT_weak	Fe_RT_weak	Fe_RT_weak	Fe_RT_weak	0.9079	0.04863
MZ22502885	AGAP004523	AARA006444	AMIN004896	AALB002994	unbiased	unbiased	unbiased	unbiased	0.9499	0.06108
MZ22502888	AGAP004062	AARA009749	AMIN002627	AALB002795	unbiased	unbiased	unbiased	unbiased	1.1193	0.12502
MZ22502890	AGAP006066	AARA007453	AMIN009906	AALB004419	unbiased	Ma_Car_weak	Ma_Car_weak	unbiased	1.1034	0.12245
MZ22502891	AGAP001681	AARA002128	AMIN003489	AALB008072	Ma_RT_weak	unbiased	unbiased	unbiased	0.8995	0.04074
MZ22502892	AGAP004750	AARA006004	AMIN007434	AALB003695	Fe_RT_weak	Fe_RT_weak	unbiased	unbiased	1.1349	0.15544
MZ22502893	AGAP007560	AARA008123	AMIN010372	AALB006232	Ma_RT_specific	unbiased	Fe_RT_specific	Ma_RT_weak	0.915	0.03868
MZ22502897	AGAP000983	AARA011725	AMIN005461	AALB006321	Fe_RT_strong	unbiased	unbiased	unbiased	0.9746	0.04725
MZ22502898	AGAP003755	AARA010039	AMIN002936	AALB002483	unbiased	unbiased	unbiased	Fe_RT_weak	1.2632	0.1426
MZ22502900	AGAP004777	AARA006023	AMIN008113	AALB007466	unbiased	unbiased	unbiased	unbiased	0.9708	0.07991
MZ22502901	AGAP002469	AARA004395	AMIN002741	AALB009727	unbiased	unbiased	unbiased	Fe_RT_weak	1.0591	0.08919
MZ22502903	AGAP011286	AARA006281	AMIN009204	AALB007426	unbiased	unbiased	unbiased	unbiased	0.8594	0.01957
MZ22502907	AGAP004284	AARA011516	AMIN003016	AALB009006	unbiased	unbiased	Fe_Ubi_weak	Fe_RT_weak	0.9423	0.05887
MZ22502909	AGAP010711	AARA008995	AMIN008651	AALB010543	Fe_RT_strong	Fe_RT_strong	Fe_RT_weak	Fe_RT_weak	0.8771	0.02635
MZ22502912	AGAP008674	AARA010926	AMIN009076	AALB000924	Fe_RT_weak	Fe_RT_weak	Fe_RT_weak	unbiased	1.4959	0.18085
MZ22502920	AGAP001441	AARA001893	AMIN003254	AALB002304	unbiased	unbiased	unbiased	unbiased	0.88	0.05348
MZ22502925	AGAP012178	AARA003272	AMIN004445	AALB009907	Ma_RT_specific	unbiased	Ma_RT_strong	Ma_Car_specific	1.2534	0.14997
MZ22502931	AGAP012963	AARA001455	AMIN000805	AALB002596	Ma_RT_specific	Ma_RT_specific	unbiased	unbiased	1.2298	0.14734
MZ22502932	AGAP010451	AARA005939	AMIN005006	AALB007615	unbiased	unbiased	unbiased	unbiased	0.9134	0.04784
MZ22502933	AGAP008929	AARA009486	AMIN005887	AALB007976	unbiased	unbiased	unbiased	unbiased	0.8604	0.02546
MZ22502937	AGAP010530	AARA000097	AMIN001269	AALB010206	unbiased	unbiased	unbiased	unbiased	1.4074	0.22871
MZ22502938	AGAP007835	AARA012033	AMIN007212	AALB000045	unbiased	unbiased	Fe_RT_weak	Fe_RT_weak	1.4116	0.188
MZ22502939	AGAP011156	AARA005595	AMIN008426	AALB007059	unbiased	unbiased	Fe_Ubi_weak	Fe_RT_weak	0.9475	0.04547
MZ22502941	AGAP004504	AARA006426	AMIN004878	AALB003561	Fe_RT_weak	Fe_RT_weak	Fe_RT_weak	unbiased	1.2011	0.16072
MZ22502944	AGAP010349	AARA005839	AMIN006543	AALB001255	not_expressed	not_expressed	Fe_RT_weak	Fe_RT_weak	1.1596	0.13251
MZ22502947	AGAP002024	AARA006918	AMIN003335	AALB008180	unbiased	unbiased	unbiased	unbiased	0.9932	0.01239
MZ22502948	AGAP011702	AARA000508	AMIN008760	AALB009790	unbiased	unbiased	unbiased	unbiased	1.1287	0.11514
MZ22502950	AGAP009090	AARA008629	AMIN009633	AALB001720	not_expressed	Fe_RT_specific	Fe_RT_strong	unbiased	0.8852	0.03724
MZ22502952	AGAP013338	AARA005338	AMIN004775	AALB003463	Ma_RT_weak	unbiased	unbiased	unbiased	0.8511	0.0272
MZ22502953	AGAP006059	AARA007462	AMIN009897	AALB004428	Ma_Car_weak	unbiased	unbiased	Fe_RT_strong	0.889	0.03589
MZ22502956	AGAP001643	AARA002086	AMIN003452	AALB003576	unbiased	unbiased	unbiased	unbiased	1.3374	0.14416
MZ22502957	AGAP010431	AARA005921	AMIN004988	AALB007592	Ma_Car_weak	unbiased	Ma_Car_weak	Ma_Car_weak	0.8242	0.00951
MZ22502961	AGAP002729	AARA004118	AMIN003586	AALB008952	unbiased	unbiased	unbiased	unbiased	0.8367	0.00753
MZ22502962	AGAP003431	AARA001507	AMIN000953	AALB002844	unbiased	unbiased	Ma_Car_weak	unbiased	0.9381	0.09048
MZ22502963	AGAP006992	AARA009308	AMIN009977	AALB005559	unbiased	unbiased	unbiased	unbiased	0.9336	0.04667
MZ22502964	AGAP003727	AARA010070	AMIN002968	AALB003014	unbiased	Ma_Car_weak	Ma_Car_weak	unbiased	0.9017	0.03767
MZ22502966	AGAP004715	AARA000347	AMIN007474	AALB007482	unbiased	unbiased	unbiased	unbiased	0.8692	0.0149
MZ22502970	AGAP009701	AARA000923	AMIN009451	AALB014009	unbiased	unbiased	Fe_Ubi_weak	not_expressed	0.8752	0.02908
MZ22502971	AGAP001985	AARA006959	AMIN003294	AALB002189	unbiased	unbiased	Ma_RT_specific	unbiased	0.9194	0.03602
MZ22502972	AGAP006461	AARA008342	AMIN007907	AALB005178	Fe_RT_weak	unbiased	unbiased	Fe_RT_weak	1.1197	0.08357
MZ22502977	AGAP007616	AARA008178	AMIN010256	AALB005397	unbiased	not_expressed	not_expressed	not_expressed	1.0021	0.091
MZ22502978	AGAP008869	AARA009412	AMIN001631	AALB001801	Fe_RT_weak	Fe_RT_weak	Fe_RT_strong	Fe_RT_weak	0.9914	0.07914
MZ22502979	AGAP002149	AARA006793	AMIN003118	AALB002247	unbiased	unbiased	unbiased	unbiased	1.4074	0.26418
MZ22502980	AGAP007163	AARA007818	AMIN010655	AALB005578	unbiased	unbiased	unbiased	Fe_RT_strong	0.9433	0.06754
MZ22502983	AGAP009664	AARA011408	AMIN001519	AALB000569	unbiased	unbiased	unbiased	unbiased	1.0617	0.16248
MZ22502988	AGAP009037	AARA006548	AMIN001034	AALB001534	unbiased	unbiased	unbiased	Fe_RT_weak	0.9801	0.05846
MZ22502989	AGAP001696	AARA002149	AMIN003507	AALB002443	unbiased	unbiased	unbiased	Ma_Car_weak	1.0152	0.08152
MZ22502991	AGAP007799	AARA011998	AMIN006389	AALB000388	Ma_RT_specific	Ma_RT_specific	Ma_RT_specific	Ma_RT_specific	1.1444	0.1024
MZ22502993	AGAP001659	AARA002103	AMIN003469	AALB008745	not_expressed	not_expressed	unbiased	Ma_Car_specific	0.8721	0.03826
MZ22502998	AGAP003484	AARA001557	AMIN000908	AALB003682	unbiased	unbiased	unbiased	unbiased	0.9089	0.04806
MZ22503001	AGAP008190	AARA004940	AMIN006090	AALB001120	unbiased	unbiased	unbiased	unbiased	0.8797	0.03445
MZ22503004	AGAP012403	AARA003474	AMIN008924	AALB003803	unbiased	unbiased	unbiased	Fe_RT_weak	1.2792	0.14096
MZ22503007	AGAP005832	AARA007677	AMIN011173	AALB005990	unbiased	Ma_Car_weak	unbiased	Ma_RT_strong	1.0519	0.06726
MZ22503008	AGAP003831	AARA009963	AMIN003028	AALB002566	unbiased	unbiased	Ma_Car_weak	Ma_Car_weak	0.9463	0.04941
MZ22503010	AGAP003230	AARA001323	AMIN000397	AALB009534	unbiased	unbiased	unbiased	unbiased	1.0261	0.07531
MZ22503011	AGAP004256	AARA011545	AMIN004097	AALB008081	unbiased	unbiased	unbiased	unbiased	1.2889	0.134
MZ22503014	AGAP002261	AARA006677	AMIN000143	AALB002165	unbiased	unbiased	unbiased	unbiased	0.9791	0.06265
MZ22503021	AGAP006762	AARA009095	AMIN010079	AALB006168	Fe_RT_weak	Fe_RT_strong	Fe_RT_weak	unbiased	0.9699	0.09962
MZ22503022	AGAP001187	AARA001657	AMIN002288	AALB009392	Ma_Car_weak	unbiased	unbiased	unbiased	0.9489	0.04308
MZ22503023	AGAP008728	AARA010870	AMIN001367	AALB001113	unbiased	Ma_RT_weak	unbiased	unbiased	1.03	0.09865
MZ22503033	AGAP005939	AARA007581	AMIN010990	AALB004144	Fe_RT_weak	Fe_RT_weak	Fe_RT_strong	unbiased	1.1577	0.15541
MZ22503035	AGAP000551	AARA010495	AMIN005304	AALB006493	unbiased	unbiased	Fe_Car_weak	Fe_Car_strong	0.9681	0.05448
MZ22503036	AGAP010723	AARA008981	AMIN009237	AALB007384	Ma_RT_weak	Ma_RT_weak	unbiased	unbiased	0.9301	0.05619
MZ22503037	AGAP001478	AARA001929	AMIN002378	AALB009253	Ma_Ubi_weak	unbiased	unbiased	unbiased	0.8342	0.01195
MZ22503042	AGAP004261	AARA011540	AMIN004092	AALB008087	unbiased	unbiased	unbiased	unbiased	1.0128	0.08637
MZ22503049	AGAP006514	AARA008396	AMIN007858	AALB005611	Ma_RT_specific	unbiased	unbiased	Ma_RT_specific	1.0125	0.08591
MZ22503050	AGAP007919	AARA005204	AMIN007079	AALB001412	unbiased	unbiased	unbiased	unbiased	1.2066	0.14926
MZ22503056	AGAP006271	AARA007264	AMIN008052	AALB003265	unbiased	unbiased	unbiased	unbiased	1.2627	0.14927
MZ22503057	AGAP010872	AARA008838	AMIN004484	AALB010647	unbiased	unbiased	unbiased	unbiased	0.8718	0.02985
MZ22503058	AGAP006490	AARA008370	AMIN007881	AALB005636	Ma_Car_weak	unbiased	unbiased	unbiased	1.0297	0.09453
MZ22503059	AGAP010754	AARA008953	AMIN007052	AALB010723	Fe_RT_weak	Fe_RT_weak	unbiased	unbiased	1.0402	0.0688
MZ22503065	AGAP007472	AARA008047	AMIN010443	AALB005130	unbiased	Ma_RT_specific	unbiased	unbiased	0.9926	0.07653
MZ22503069	AGAP007612	AARA008174	AMIN010252	AALB005392	unbiased	unbiased	unbiased	Ma_Car_weak	1.1926	0.15663
MZ22503070	AGAP010071	AARA003704	AMIN006652	AALB000880	Fe_RT_weak	Ma_RT_weak	unbiased	unbiased	1.4138	0.24846
MZ22503073	AGAP010693	AARA009012	AMIN008670	AALB007015	Fe_Ubi_weak	unbiased	Fe_Ubi_weak	unbiased	0.9689	0.0721
MZ22503074	AGAP009006	AARA009572	AMIN001553	AALB000545	not_expressed	not_expressed	unbiased	not_expressed	0.9537	0.0798
MZ22503075	AGAP010787	AARA008924	AMIN007030	AALB000519	Fe_RT_weak	Fe_RT_weak	Fe_RT_strong	Fe_RT_weak	1.1654	0.13302
MZ22503083	AGAP011659	AARA002642	AMIN008794	AALB010302	Fe_RT_weak	Fe_RT_weak	unbiased	Fe_RT_weak	1.5712	0.21548
MZ22503085	AGAP002041	AARA006904	AMIN003348	AALB008094	unbiased	unbiased	unbiased	Ma_Car_weak	1.0751	0.11316
MZ22503091	AGAP011322	AARA006239	AMIN009165	AALB007387	unbiased	unbiased	unbiased	Fe_Car_weak	1.0112	0.07915
MZ22503095	AGAP010425	AARA005913	AMIN004980	AALB007585	unbiased	unbiased	Fe_RT_weak	Fe_RT_weak	1.047	0.10761
MZ22503098	AGAP010302	AARA000465	AMIN000057	AALB002921	Ma_Car_specific	unbiased	Ma_Ubi_specific	not_expressed	1.3697	0.05216
MZ22503099	AGAP006378	AARA000889	AMIN007988	AALB004900	unbiased	not_expressed	unbiased	Ma_Ubi_specific	1.195	0.10543
MZ22503103	AGAP010179	AARA007110	AMIN007257	AALB014723	Fe_RT_weak	Fe_RT_weak	unbiased	unbiased	1.0734	0.09019
MZ22503107	AGAP003133	AARA001235	AMIN004650	AALB007270	unbiased	unbiased	unbiased	unbiased	1.0297	0.10627
MZ22503109	AGAP011489	AARA002811	AMIN009032	AALB007109	Ma_Car_specific	not_expressed	Ma_RT_specific	Ma_Ubi_weak	1.0164	0.0547
MZ22503116	AGAP008646	AARA010953	AMIN009098	AALB000901	unbiased	unbiased	unbiased	unbiased	0.8821	0.0572
MZ22503119	AGAP005508	AARA002302	AMIN010835	AALB005969	Fe_RT_weak	Fe_RT_weak	Fe_RT_weak	Fe_RT_weak	1.0841	0
MZ22503122	AGAP011384	AARA006183	AMIN004490	AALB003952	unbiased	unbiased	unbiased	Ma_Car_weak	1.1289	0.12931
MZ22503123	AGAP006624	AARA008501	AMIN007771	AALB005587	unbiased	unbiased	Fe_RT_weak	unbiased	1.1035	0.12146
MZ22503124	AGAP007732	AARA011935	AMIN006317	AALB000745	Fe_Car_weak	Ma_RT_strong	Ma_RT_strong	Fe_Car_strong	0.8734	0.04184
MZ22503127	AGAP007532	AARA008098	AMIN010398	AALB005445	unbiased	unbiased	unbiased	unbiased	0.8319	0.0137
MZ22503128	AGAP001688	AARA002138	AMIN003498	AALB008864	unbiased	unbiased	unbiased	unbiased	0.8786	0.03514
MZ22503134	AGAP001752	AARA002204	AMIN000763	AALB008123	unbiased	unbiased	unbiased	unbiased	0.9992	0.09934
MZ22503135	AGAP009003	AARA009568	AMIN009448	AALB001898	Ma_Car_weak	unbiased	unbiased	unbiased	0.9448	0.05995
MZ22503138	AGAP001559	AARA002010	AMIN002452	AALB003919	unbiased	unbiased	unbiased	unbiased	0.8405	0.03432
MZ22503140	AGAP008745	AARA010853	AMIN001382	AALB001092	Ma_RT_specific	Ma_RT_specific	Ma_RT_specific	Ma_RT_specific	1.0795	0.12271
MZ22503141	AGAP011217	AARA000142	AMIN008367	AALB010581	Fe_RT_weak	Fe_RT_weak	Fe_RT_weak	unbiased	1.2007	0.07802
MZ22503145	AGAP002104	AARA006840	AMIN000632	AALB002617	Ma_Car_specific	unbiased	unbiased	Ma_Ubi_weak	0.9558	0.07299
MZ22503151	AGAP028220	AARA010805	AMIN001434	AALB001169	Fe_RT_specific	unbiased	Fe_RT_weak	Fe_RT_weak	1.3188	0.11375
MZ22503154	AGAP008858	AARA009396	AMIN001616	AALB000482	unbiased	unbiased	unbiased	Fe_RT_weak	1.0398	0.07588
MZ22503160	AGAP003167	AARA001268	AMIN002765	AALB008738	unbiased	unbiased	Fe_Car_weak	unbiased	0.8486	0.02291
MZ22503161	AGAP004685	AARA011430	AMIN006464	AALB007535	unbiased	Fe_RT_weak	Fe_RT_strong	Fe_RT_strong	1.4217	0.16255
MZ22503163	AGAP001503	AARA001955	AMIN002401	AALB009231	unbiased	unbiased	Ma_RT_weak	Fe_RT_weak	1.2349	0.18359
MZ22503164	AGAP003296	AARA001376	AMIN000346	AALB008865	unbiased	unbiased	unbiased	unbiased	0.9908	0.08528
MZ22503165	AGAP001010	AARA011749	AMIN005394	AALB006884	unbiased	unbiased	unbiased	Fe_Car_weak	0.9711	0.05954
MZ22503166	AGAP001794	AARA000443	AMIN000687	AALB002868	unbiased	Fe_RT_weak	unbiased	unbiased	1.1641	0.12093
MZ22503167	AGAP012307	AARA003389	AMIN006868	AALB010094	unbiased	unbiased	unbiased	unbiased	0.8655	0.02968
MZ22503168	AGAP002884	AARA004695	AMIN003206	AALB003657	unbiased	unbiased	unbiased	unbiased	0.8121	0.00604
MZ22503169	AGAP000142	AARA001027	AMIN005454	AALB006780	unbiased	unbiased	unbiased	Fe_RT_strong	1.078	0.05309
MZ22503174	AGAP005384	AARA002412	AMIN007418	AALB005346	not_expressed	Ma_RT_specific	unbiased	unbiased	1.2152	0.13982
MZ22503175	AGAP012087	AARA003188	AMIN008257	AALB010003	unbiased	unbiased	unbiased	Fe_RT_weak	1.2022	0.15908
MZ22503178	AGAP000271	AARA010607	AMIN005689	AALB006888	Fe_RT_strong	Fe_RT_strong	Fe_RT_strong	Fe_RT_weak	2.1334	0.17371
MZ22503181	AGAP000912	AARA000408	AMIN001212	AALB006595	unbiased	unbiased	unbiased	unbiased	1.0528	0.0777
MZ22503188	AGAP008554	AARA011028	AMIN001005	AALB000404	Fe_RT_weak	Fe_RT_strong	Fe_RT_specific	Fe_RT_strong	1.2502	0.14903
MZ22503189	AGAP009674	AARA000946	AMIN001529	AALB000561	unbiased	unbiased	Ma_RT_weak	Ma_RT_weak	0.8792	0.03375
MZ22503190	AGAP013764	AARA005201	AMIN007075	AALB001409	unbiased	unbiased	unbiased	unbiased	1.1538	0.19181
MZ22503192	AGAP010817	AARA008887	AMIN006990	AALB010844	Ma_Car_specific	unbiased	Ma_Car_weak	Ma_Car_weak	0.8796	0.01811
MZ22503199	AGAP004560	AARA006469	AMIN004925	AALB002971	Fe_RT_weak	unbiased	unbiased	Fe_RT_weak	1.0017	0.04996
MZ22503202	AGAP001782	AARA000454	AMIN000701	AALB003075	Ma_Car_weak	unbiased	unbiased	Ma_Car_weak	1.0586	0.12341
MZ22503203	AGAP002711	AARA004136	AMIN003604	AALB008971	unbiased	unbiased	unbiased	Fe_RT_weak	0.9034	0.04448
MZ22503205	AGAP009591	AARA011791	AMIN009849	AALB000524	Fe_Car_weak	Ma_Car_weak	unbiased	Fe_Car_weak	0.9339	0.05935
MZ22503206	AGAP005173	AARA003005	AMIN007338	AALB003199	unbiased	unbiased	Fe_RT_weak	unbiased	0.9048	0.05163
MZ22503208	AGAP000561	AARA010485	AMIN005334	AALB006788	Fe_RT_weak	unbiased	unbiased	Fe_RT_weak	0.8772	0.02925
MZ22503209	AGAP002411	AARA004467	AMIN002674	AALB007183	unbiased	unbiased	unbiased	Fe_RT_weak	1.0619	0.09573
MZ22503214	AGAP000129	AARA001038	AMIN005096	AALB006430	Ma_Car_weak	unbiased	Ma_Car_weak	Ma_Car_weak	0.9579	0.04878
MZ22503215	AGAP007648	AARA008212	AMIN010290	AALB006254	unbiased	unbiased	unbiased	unbiased	1.1138	0.1191
MZ22503217	AGAP002719	AARA004129	AMIN003596	AALB008963	unbiased	unbiased	unbiased	Ma_Car_weak	0.9408	0.05394
MZ22503219	AGAP003929	AARA009856	AMIN000286	AALB008253	not_expressed	unbiased	unbiased	unbiased	0.964	0.0963
MZ22503224	AGAP008494	AARA011081	AMIN009830	AALB001779	Ma_RT_weak	unbiased	unbiased	unbiased	1.0885	0.11994
MZ22503225	AGAP000303	AARA010636	AMIN001970	AALB006858	not_expressed	Fe_RT_specific	Fe_RT_strong	unbiased	0.8893	0.03716
MZ22503229	AGAP006954	AARA009278	AMIN007723	AALB005734	unbiased	not_expressed	Ma_RT_specific	Ma_RT_specific	1.0182	0.07319
MZ22503230	AGAP004272	AARA011527	AMIN004077	AALB008423	unbiased	unbiased	unbiased	Ma_Car_weak	1.0477	0.13073
MZ22503235	AGAP003332	AARA001416	AMIN002861	AALB003117	unbiased	Fe_RT_weak	unbiased	unbiased	1.3314	0.14023
MZ22503236	AGAP005583	AARA005809	AMIN010895	AALB004920	unbiased	Fe_RT_weak	unbiased	Ma_Car_weak	1.0437	0.09378
MZ22503238	AGAP007808	AARA012009	AMIN006400	AALB001576	Fe_RT_weak	Fe_RT_strong	unbiased	Fe_RT_weak	1.1111	0.12921
MZ22503239	AGAP006128	AARA007395	AMIN010686	AALB005670	unbiased	unbiased	Fe_RT_weak	Fe_RT_weak	1.8265	0.26165
MZ22503240	AGAP010282	AARA005276	AMIN001110	AALB002940	Fe_RT_weak	unbiased	Fe_RT_strong	unbiased	1.0258	0.06848
MZ22503241	AGAP001369	AARA001824	AMIN000551	AALB003008	Ma_Car_weak	unbiased	unbiased	unbiased	0.9316	0.05235
MZ22503244	AGAP000143	AARA001026	AMIN005453	AALB006779	Fe_Ubi_weak	Fe_RT_strong	Fe_Car_weak	Fe_Car_weak	1.0136	0.07833
MZ22503247	AGAP008819	AARA010779	AMIN007196	AALB001182	unbiased	unbiased	unbiased	unbiased	1.0815	0.04641
MZ22503249	AGAP008239	AARA004897	AMIN006047	AALB000174	Fe_RT_weak	Fe_RT_weak	Fe_RT_weak	unbiased	1.0505	0.09769
MZ22503251	AGAP001905	AARA007026	AMIN000468	AALB008818	unbiased	Ma_Car_weak	unbiased	unbiased	0.9996	0.10132
MZ22503252	AGAP009516	AARA011862	AMIN001890	AALB000189	Ma_Car_weak	unbiased	unbiased	unbiased	0.8276	0.01187
MZ22503255	AGAP007307	AARA007928	AMIN010555	AALB005485	unbiased	unbiased	unbiased	unbiased	0.8398	0.02681
MZ22503259	AGAP009921	AARA003858	AMIN006819	AALB000368	unbiased	Fe_RT_weak	Fe_RT_strong	Fe_RT_strong	0.8375	0.02261
MZ22503261	AGAP002830	AARA004651	AMIN000610	AALB002322	Fe_Car_weak	unbiased	unbiased	Fe_Car_strong	0.8502	0.02042
MZ22503263	AGAP000885	AARA002571	AMIN001942	AALB007640	unbiased	unbiased	unbiased	Fe_RT_strong	1.04	0.09383
MZ22503266	AGAP001497	AARA001948	AMIN002395	AALB009237	unbiased	unbiased	unbiased	unbiased	0.8159	0.00952
MZ22503268	AGAP001225	AARA001698	AMIN002250	AALB009353	Fe_RT_weak	Fe_RT_weak	unbiased	unbiased	1.1684	0.10472
MZ22503271	AGAP002671	AARA004171	AMIN003634	AALB008677	Fe_RT_weak	unbiased	unbiased	unbiased	1.2342	0.15688
MZ22503276	AGAP008561	AARA011021	AMIN000997	AALB000411	not_expressed	not_expressed	Ma_RT_specific	Ma_RT_specific	1.5095	0.23071
MZ22503279	AGAP008632	AARA010966	AMIN009113	AALB000964	Fe_Car_strong	Fe_Car_weak	Fe_Car_weak	Fe_Car_strong	0.8492	0.02031
MZ22503280	AGAP003108	AARA001210	AMIN003802	AALB003060	Ma_Car_weak	unbiased	unbiased	unbiased	1.0776	0.11537
MZ22503281	AGAP011421	AARA002877	AMIN008971	AALB010340	Fe_RT_weak	unbiased	unbiased	Fe_RT_weak	0.9494	0.04522
MZ22503282	AGAP012169	AARA003264	AMIN008333	AALB010814	unbiased	unbiased	unbiased	unbiased	0.8604	0.01965
MZ22503285	AGAP010491	AARA006346	AMIN001241	AALB009842	Fe_RT_weak	Fe_RT_weak	Fe_RT_weak	Fe_RT_weak	0.9146	0.04886
MZ22503287	AGAP003746	AARA010048	AMIN002946	AALB003037	Ma_Car_weak	Ma_Ubi_weak	Ma_RT_specific	unbiased	1.0566	0.09733
MZ22503290	AGAP011623	AARA002678	AMIN008820	AALB003835	unbiased	unbiased	Fe_RT_weak	Fe_RT_weak	1.092	0.08598
MZ22503292	AGAP004608	AARA011623	AMIN000025	AALB008355	Fe_RT_weak	unbiased	unbiased	unbiased	1.204	0.11136
MZ22503295	AGAP008977	AARA009541	AMIN009419	AALB007999	unbiased	unbiased	unbiased	unbiased	0.9499	0.08233
MZ22503296	AGAP000429	AARA010691	AMIN005576	AALB006470	Fe_RT_weak	unbiased	Fe_RT_weak	unbiased	1.0497	0.08151
MZ22503298	AGAP007258	AARA007888	AMIN010591	AALB005520	unbiased	unbiased	unbiased	unbiased	0.857	0.02749
MZ22503303	AGAP009538	AARA011838	AMIN001914	AALB001332	unbiased	Ma_Car_weak	unbiased	unbiased	0.8282	0.0111
MZ22503306	AGAP009488	AARA011892	AMIN001864	AALB001612	Fe_RT_strong	Fe_RT_strong	Fe_RT_weak	Fe_RT_weak	0.9575	0.06352
MZ22503309	AGAP009066	AARA008607	AMIN009611	AALB000671	Ma_RT_specific	Fe_RT_weak	unbiased	unbiased	1.147	0.12713
MZ22503310	AGAP009025	AARA011930	AMIN001576	AALB001209	unbiased	not_expressed	unbiased	Ma_RT_specific	1.2476	0.14055
MZ22503313	AGAP008790	AARA010809	AMIN001430	AALB000086	Ma_RT_weak	Ma_RT_weak	unbiased	unbiased	0.9163	0.09666
MZ22503315	AGAP001399	AARA001847	AMIN000575	AALB002355	unbiased	unbiased	unbiased	unbiased	0.8484	0.02143
MZ22503318	AGAP004937	AARA003537	AMIN011430	AALB007309	unbiased	unbiased	unbiased	Fe_RT_weak	0.9098	0.04145
MZ22503320	AGAP000711	AARA010337	AMIN005190	AALB006894	Fe_RT_weak	Fe_RT_weak	Fe_RT_strong	Fe_RT_strong	1.4528	0.16563
MZ22503321	AGAP009036	AARA006550	AMIN001032	AALB001532	unbiased	Fe_Car_weak	Fe_Car_weak	Fe_Car_weak	0.979	0.05736
MZ22503322	AGAP000502	AARA000375	AMIN005252	AALB007668	unbiased	not_expressed	unbiased	unbiased	0.8341	0.01689
MZ22503324	AGAP005326	AARA002464	AMIN007370	AALB005896	Fe_Ubi_specific	unbiased	unbiased	unbiased	1.4152	0.22908
MZ22503327	AGAP007164	AARA007819	AMIN010654	AALB005579	not_expressed	not_expressed	not_expressed	Ma_RT_specific	1.1588	0.11197
MZ22503329	AGAP011241	AARA000162	AMIN008358	AALB010590	Fe_RT_weak	Fe_RT_weak	unbiased	Fe_RT_weak	1.4482	0.20978
MZ22503330	AGAP005237	AARA002946	AMIN011575	AALB004342	unbiased	Ma_Car_weak	unbiased	unbiased	1.0001	0.04814
MZ22503331	AGAP001286	AARA001753	AMIN002196	AALB009201	unbiased	unbiased	unbiased	unbiased	0.8505	0.02159
MZ22503332	AGAP002090	AARA006854	AMIN000650	AALB009288	unbiased	unbiased	Ma_Car_weak	Ma_Car_weak	1.0532	0.10904
MZ22503339	AGAP007050	AARA005628	AMIN011094	AALB005009	Fe_Car_weak	Ma_RT_weak	Fe_Car_weak	unbiased	0.8714	0.03614
MZ22503340	AGAP003023	AARA004849	AMIN003729	AALB002402	unbiased	Ma_RT_weak	unbiased	Ma_Car_weak	0.835	0.02259
MZ22503343	AGAP009008	AARA009575	AMIN001556	AALB000548	not_expressed	not_expressed	not_expressed	not_expressed	1.1406	0.15574
MZ22503348	AGAP005640	AARA002487	AMIN010191	AALB004663	unbiased	unbiased	unbiased	unbiased	0.8404	0.00949
MZ22503350	AGAP001762	AARA002211	AMIN003184	AALB003419	unbiased	Ma_RT_weak	unbiased	unbiased	0.9848	0.08094
MZ22503352	AGAP011359	AARA006205	AMIN004256	AALB008481	unbiased	unbiased	unbiased	unbiased	0.9817	0.09634
MZ22503353	AGAP003159	AARA001261	AMIN000204	AALB009065	Fe_RT_weak	Fe_RT_weak	Fe_RT_weak	unbiased	1.0384	0.10347
MZ22503354	AGAP003635	AARA010161	AMIN002806	AALB002637	unbiased	unbiased	unbiased	unbiased	1.2672	0.19303
MZ22503358	AGAP012259	AARA003345	AMIN006909	AALB009983	Fe_RT_weak	unbiased	unbiased	Fe_RT_weak	1.3236	0.18738
MZ22503367	AGAP003160	AARA001262	AMIN002771	AALB002346	unbiased	unbiased	unbiased	unbiased	1.1751	0.30018
MZ22503368	AGAP008353	AARA011209	AMIN005947	AALB001469	unbiased	unbiased	unbiased	Fe_RT_weak	0.9343	0.05025
MZ22503369	AGAP000361	AARA010755	AMIN005825	AALB006377	Ma_Car_weak	unbiased	unbiased	unbiased	0.8853	0.24732
MZ22503370	AGAP002382	AARA004497	AMIN004674	AALB002745	unbiased	unbiased	unbiased	Fe_Car_weak	1.1795	0.12019
MZ22503373	AGAP000189	AARA000975	AMIN005413	AALB006819	Fe_RT_weak	Fe_RT_weak	unbiased	unbiased	1.6084	0.16522
MZ22503376	AGAP009496	AARA011884	AMIN001870	AALB001610	unbiased	unbiased	unbiased	unbiased	1.0002	0.15357
MZ22503377	AGAP011299	AARA006266	AMIN009190	AALB007412	unbiased	unbiased	unbiased	unbiased	1.0504	0.10072
MZ22503378	AGAP005892	AARA007629	AMIN011559	AALB004784	unbiased	unbiased	Fe_RT_weak	Fe_RT_strong	0.8584	0.02185
MZ22503383	AGAP006741	AARA009080	AMIN010094	AALB006192	unbiased	unbiased	unbiased	unbiased	1.2555	0.15304
MZ22503384	AGAP007724	AARA008275	AMIN010360	AALB005434	unbiased	unbiased	unbiased	unbiased	1.1388	0.05381
MZ22503387	AGAP000107	AARA001065	AMIN005070	AALB006710	Ma_RT_specific	Ma_RT_specific	Ma_RT_specific	Ma_RT_specific	0.9093	0.04289
MZ22503388	AGAP003687	AARA010104	AMIN004695	AALB010877	unbiased	unbiased	Fe_Car_weak	unbiased	0.9288	0.06096
MZ22503389	AGAP001786	AARA000452	AMIN000696	AALB003072	Fe_RT_weak	Fe_RT_strong	unbiased	Fe_RT_strong	1.1204	0.15542
MZ22503391	AGAP008181	AARA004949	AMIN006097	AALB000030	Ma_RT_strong	unbiased	unbiased	unbiased	1.1572	0.11637
MZ22503392	AGAP003118	AARA001218	AMIN003811	AALB003438	Fe_RT_weak	Fe_RT_weak	unbiased	Fe_RT_weak	0.9651	0.09405
MZ22503393	AGAP000209	AARA010541	AMIN005542	AALB006589	Ma_Car_weak	unbiased	unbiased	Ma_Car_weak	1.0128	0.06257
MZ22503395	AGAP011830	AARA000646	AMIN004337	AALB010383	unbiased	unbiased	unbiased	Fe_RT_weak	0.8977	0.03814
MZ22503399	AGAP009001	AARA009564	AMIN009443	AALB001894	Ma_RT_specific	Ma_RT_specific	unbiased	Ma_RT_specific	0.9176	0.06302
MZ22503402	AGAP011881	AARA000682	AMIN008569	AALB003723	Fe_RT_weak	Fe_RT_weak	Fe_RT_weak	Fe_RT_strong	1.235	0.12436
MZ22503403	AGAP006428	AARA008302	AMIN007942	AALB005086	unbiased	unbiased	unbiased	unbiased	1.1779	0.12986
MZ22503407	AGAP011804	AARA000608	AMIN004304	AALB010855	unbiased	unbiased	Fe_RT_weak	Fe_RT_weak	0.9555	0.06817
MZ22503410	AGAP004800	AARA006046	AMIN008140	AALB007520	unbiased	unbiased	unbiased	unbiased	1.3127	0.17147
MZ22503416	AGAP006166	AARA007358	AMIN011298	AALB005843	Ma_RT_specific	Ma_RT_specific	Ma_RT_specific	unbiased	1.085	0.12764
MZ22503417	AGAP008204	AARA004922	AMIN006069	AALB001849	Ma_RT_strong	Ma_RT_strong	Ma_RT_strong	unbiased	1.0217	0.07302
MZ22503418	AGAP003576	AARA006637	AMIN000181	AALB009692	Fe_RT_strong	Fe_RT_weak	Fe_RT_weak	Fe_RT_weak	0.8931	0.04965
MZ22503426	AGAP002217	AARA006724	AMIN000815	AALB008309	unbiased	unbiased	unbiased	unbiased	0.8915	0.04438
MZ22503428	AGAP005391	AARA002408	AMIN007421	AALB004818	unbiased	Fe_RT_weak	unbiased	unbiased	1.0691	0.07417
MZ22503429	AGAP006702	AARA008575	AMIN010128	AALB005368	Fe_RT_strong	Fe_RT_strong	Fe_RT_strong	Fe_RT_strong	1.1835	0.11766
MZ22503430	AGAP007335	AARA007950	AMIN010535	AALB004490	unbiased	Fe_RT_weak	Fe_RT_weak	Fe_RT_weak	0.8912	0.03021
MZ22503438	AGAP001954	AARA006984	AMIN000514	AALB002705	Fe_RT_weak	Fe_RT_strong	Fe_RT_weak	Fe_RT_weak	1.0106	0.09215
MZ22503443	AGAP006205	AARA007326	AMIN011327	AALB004688	Fe_RT_weak	Fe_RT_weak	Fe_RT_weak	Fe_RT_weak	1.1631	0.14337
MZ22503452	AGAP004288	AARA011510	AMIN003009	AALB009012	unbiased	unbiased	unbiased	unbiased	0.9216	0.06413
MZ22503454	AGAP010837	AARA008871	AMIN006974	AALB009782	unbiased	Fe_RT_weak	unbiased	unbiased	0.9816	0.05432
MZ22503458	AGAP011640	AARA002658	AMIN008805	AALB010291	unbiased	unbiased	unbiased	unbiased	1.1338	0.12398
MZ22503459	AGAP008830	AARA009372	AMIN001585	AALB001529	Ma_RT_weak	Ma_RT_weak	unbiased	unbiased	0.8915	0.04862
MZ22503461	AGAP008384	AARA011180	AMIN005922	AALB001001	unbiased	unbiased	unbiased	unbiased	1.1354	0.15296
MZ22503463	AGAP010175	AARA007106	AMIN007253	AALB001288	unbiased	unbiased	unbiased	unbiased	1.0421	0.09725
MZ22503464	AGAP000410	AARA010705	AMIN005690	AALB006802	unbiased	unbiased	unbiased	unbiased	1.0289	0.06091
MZ22503468	AGAP002291	AARA004075	AMIN004570	AALB008608	Ma_Car_weak	unbiased	Ma_Car_weak	unbiased	0.8958	0.04505
MZ22503472	AGAP000666	AARA010391	AMIN005781	AALB007743	Fe_RT_strong	Fe_RT_strong	Fe_RT_strong	Fe_RT_strong	1.2352	0.11346
MZ22503474	AGAP000463	AARA010660	AMIN005607	AALB007714	Fe_RT_weak	Fe_RT_weak	unbiased	Fe_RT_weak	1.4352	0.19456
MZ22503479	AGAP003983	AARA009814	AMIN000326	AALB007250	unbiased	unbiased	unbiased	Fe_RT_weak	1.3993	0.28355
MZ22503484	AGAP000504	AARA000372	AMIN005254	AALB007666	unbiased	unbiased	unbiased	Fe_RT_weak	1.3958	0.18603
MZ22503488	AGAP002805	AARA004625	AMIN003908	AALB008891	unbiased	unbiased	unbiased	unbiased	0.9725	0.06799
MZ22503489	AGAP004035	AARA009771	AMIN002604	AALB003355	Ma_RT_weak	Ma_RT_specific	Ma_RT_specific	unbiased	0.9464	0.06252
MZ22503492	AGAP006621	AARA008498	AMIN007774	AALB005590	unbiased	Fe_RT_weak	unbiased	Fe_RT_weak	1.469	0.17953
MZ22503499	AGAP000552	AARA010494	AMIN005305	AALB006492	unbiased	unbiased	Fe_RT_specific	Fe_RT_weak	0.8924	0.03515
MZ22503502	AGAP002752	AARA004094	AMIN003562	AALB002392	unbiased	unbiased	unbiased	Ma_RT_weak	0.8797	0.04221
MZ22503507	AGAP004090	AARA009720	AMIN003813	AALB003623	unbiased	unbiased	unbiased	unbiased	0.9463	0.06668
MZ22503510	AGAP007984	AARA005139	AMIN006280	AALB000326	Fe_RT_weak	unbiased	unbiased	Fe_RT_weak	0.8549	0.01904
MZ22503513	AGAP001745	AARA002194	AMIN000771	AALB008114	unbiased	unbiased	unbiased	unbiased	0.8646	0.02954
MZ22503514	AGAP006756	AARA009090	AMIN010084	AALB006172	Ma_RT_strong	Ma_RT_strong	unbiased	Ma_RT_strong	1.197	0.13893
MZ22503520	AGAP007802	AARA012002	AMIN006393	AALB000385	Fe_RT_specific	Fe_RT_specific	Fe_RT_strong	unbiased	1.0829	0.11411
MZ22503523	AGAP006601	AARA008476	AMIN007794	AALB005052	unbiased	unbiased	unbiased	unbiased	1.187	0.37082
MZ22503526	AGAP005633	AARA005765	AMIN007569	AALB004627	unbiased	unbiased	unbiased	unbiased	1.1284	0.12161
MZ22503529	AGAP010051	AARA003721	AMIN006678	AALB007973	Fe_RT_weak	unbiased	unbiased	unbiased	0.9661	0.06944
MZ22503531	AGAP009174	AARA008712	AMIN009719	AALB000349	unbiased	unbiased	unbiased	Fe_RT_weak	0.8798	0.0358
MZ22503533	AGAP005043	AARA003136	AMIN011533	AALB004977	Ma_Car_weak	unbiased	Ma_RT_specific	Ma_Car_weak	0.8758	0.04142
MZ22503537	AGAP005039	AARA003140	AMIN011529	AALB014654	unbiased	Ma_RT_weak	unbiased	unbiased	1.3538	0.2363
MZ22503538	AGAP011052	AARA005485	AMIN008536	AALB010595	unbiased	Ma_RT_weak	Ma_RT_weak	Ma_RT_weak	0.9752	0.07808
MZ22503541	AGAP012417	AARA014320	AMIN008911	AALB003711	Fe_RT_weak	Fe_RT_weak	unbiased	unbiased	0.9786	0.04149
MZ22503546	AGAP003457	AARA001530	AMIN000938	AALB002827	Ma_RT_weak	Ma_RT_weak	unbiased	Ma_RT_weak	1.071	0.08529
MZ22503553	AGAP005963	AARA007551	AMIN010966	AALB005786	unbiased	unbiased	unbiased	unbiased	1.1115	0.08945
MZ22503555	AGAP008127	AARA005001	AMIN006150	AALB001499	unbiased	Fe_Car_weak	Ma_Car_weak	Ma_Car_weak	0.9221	0.045
MZ22503559	AGAP005728	AARA005691	AMIN011036	AALB004642	Fe_RT_weak	unbiased	Fe_RT_weak	Fe_RT_weak	0.9008	0.03741
MZ22503560	AGAP001290	AARA001755	AMIN002193	AALB009199	Fe_RT_weak	Fe_RT_weak	Fe_RT_weak	unbiased	1.0845	0.08266
MZ22503561	AGAP010168	AARA007097	AMIN007245	AALB007894	not_expressed	not_expressed	Ma_RT_specific	unbiased	1.0511	0.07965
MZ22503563	AGAP009074	AARA008615	AMIN009619	AALB000142	unbiased	unbiased	unbiased	unbiased	0.9434	0.05301
MZ22503566	AGAP009170	AARA008709	AMIN009715	AALB000353	unbiased	unbiased	unbiased	unbiased	0.9378	0.02938
MZ22503567	AGAP012465	AARA002491	AMIN006511	AALB003882	unbiased	not_expressed	not_expressed	not_expressed	1.201	0.11151
MZ22503568	AGAP002672	AARA004170	AMIN003633	AALB008676	unbiased	unbiased	unbiased	unbiased	0.9448	0.06349
MZ22503572	AGAP002243	AARA006694	AMIN000160	AALB009644	unbiased	unbiased	unbiased	Fe_RT_weak	0.8573	0.02558
MZ22503574	AGAP012064	AARA003172	AMIN008239	AALB010141	unbiased	unbiased	unbiased	unbiased	1.0174	0.01621
MZ22503575	AGAP004061	AARA009750	AMIN002626	AALB002796	Fe_RT_weak	Fe_RT_weak	Fe_RT_strong	unbiased	1.3443	0.11924
MZ22503579	AGAP007423	AARA008030	AMIN010460	AALB005109	Fe_RT_strong	unbiased	Fe_RT_strong	Fe_RT_weak	1.0985	0.11377
MZ22503582	AGAP007774	AARA011969	AMIN006356	AALB000246	unbiased	unbiased	Fe_RT_weak	unbiased	1.1524	0.12459
MZ22503584	AGAP001418	AARA001871	AMIN000596	AALB008290	unbiased	Fe_RT_weak	unbiased	unbiased	0.8411	0.02324
MZ22503592	AGAP006381	AARA000891	AMIN007986	AALB004897	unbiased	unbiased	unbiased	Ma_Car_weak	1.11	0.11088
MZ22503597	AGAP009643	AARA011388	AMIN001500	AALB001876	unbiased	unbiased	unbiased	unbiased	0.9105	0.03968
MZ22503602	AGAP000385	AARA010730	AMIN005659	AALB006540	unbiased	unbiased	unbiased	unbiased	1.1197	0.10244
MZ22503604	AGAP009232	AARA008767	AMIN009763	AALB000146	unbiased	Fe_RT_specific	Fe_RT_weak	Fe_RT_specific	0.9054	0.04101
MZ22503606	AGAP000623	AARA010430	AMIN005352	AALB007735	unbiased	Ma_Car_weak	unbiased	unbiased	1.2902	0.14704
MZ22503610	AGAP007846	AARA012041	AMIN007161	AALB001903	unbiased	unbiased	Ma_Car_specific	Ma_Car_weak	0.8743	0.0554
MZ22503611	AGAP008984	AARA009550	AMIN009427	AALB000655	Fe_RT_weak	Fe_RT_weak	Fe_RT_weak	Fe_RT_strong	1.7474	0.25122
MZ22503614	AGAP004956	AARA003557	AMIN011451	AALB007447	Fe_RT_strong	Fe_RT_strong	Fe_RT_strong	Fe_RT_weak	0.8669	0.03571
MZ22503617	AGAP028025	AARA009367	AMIN007205	AALB001193	Ma_RT_specific	Ma_RT_strong	unbiased	unbiased	1.1107	0.11267
MZ22503618	AGAP001146	AARA001621	AMIN002321	AALB009425	Fe_RT_weak	unbiased	Fe_RT_weak	unbiased	0.9523	0.07405
MZ22503623	AGAP009826	AARA003946	AMIN009552	AALB001567	unbiased	unbiased	unbiased	unbiased	0.9923	0.09775
MZ22503624	AGAP008320	AARA011246	AMIN005982	AALB000278	Ma_Car_weak	unbiased	Ma_Car_weak	Ma_Car_weak	0.9189	0.06843
MZ22503628	AGAP011925	AARA000720	AMIN008602	AALB003753	unbiased	unbiased	unbiased	unbiased	0.9547	0.02235
MZ22503637	AGAP007272	AARA007896	AMIN010582	AALB005513	not_expressed	not_expressed	not_expressed	unbiased	1.4801	0.21965
MZ22503641	AGAP002891	AARA004704	AMIN003198	AALB003053	unbiased	unbiased	unbiased	unbiased	0.8827	0.04065
MZ22503642	AGAP028131	AARA010907	AMIN001331	AALB000942	not_expressed	not_expressed	unbiased	Ma_Car_specific	0.9416	0.05618
MZ22503653	AGAP004812	AARA006055	AMIN008151	AALB004579	unbiased	unbiased	unbiased	unbiased	0.9183	0.05038
MZ22503654	AGAP001534	AARA001980	AMIN002425	AALB009145	unbiased	unbiased	Fe_Car_weak	Fe_Car_weak	1.0419	0.10263
MZ22503660	AGAP012079	AARA003184	AMIN008253	AALB010000	unbiased	unbiased	unbiased	Ma_RT_specific	1.0337	0.05436
MZ22503664	AGAP007105	AARA007767	AMIN011244	AALB005759	unbiased	Ma_Car_specific	Ma_Car_specific	unbiased	0.8598	0.02273
MZ22503665	AGAP004825	AARA006068	AMIN008166	AALB004753	Fe_RT_weak	Fe_RT_strong	Fe_RT_weak	Fe_RT_strong	1.2009	0.11572
MZ22503668	AGAP000702	AARA010347	AMIN005835	AALB006301	Ma_Car_weak	unbiased	unbiased	Ma_Car_weak	0.9929	0.05301
MZ22503669	AGAP011880	AARA000681	AMIN008568	AALB003722	Fe_RT_weak	Fe_RT_weak	Fe_RT_weak	Ma_RT_weak	1.1407	0.15096
MZ22503670	AGAP000787	AARA010275	AMIN002017	AALB007659	unbiased	unbiased	unbiased	unbiased	1.0701	0.05266
MZ22503671	AGAP001415	AARA001866	AMIN000592	AALB008285	Ma_Car_weak	unbiased	unbiased	Ma_Car_weak	0.8454	0.01888
MZ22503676	AGAP003115	AARA001215	AMIN003808	AALB003441	Ma_Car_weak	unbiased	unbiased	Ma_Car_weak	0.8524	0.02302
MZ22503682	AGAP002481	AARA004383	AMIN002491	AALB007167	unbiased	unbiased	unbiased	Fe_RT_weak	0.8373	0.0121
MZ22503686	AGAP006750	AARA009087	AMIN010087	AALB006176	unbiased	Fe_RT_weak	unbiased	Fe_RT_weak	1.0139	0.10479
MZ22503690	AGAP009189	AARA008728	AMIN009730	AALB001442	unbiased	unbiased	unbiased	Fe_RT_weak	0.9788	0.05959
MZ22503693	AGAP000301	AARA010634	AMIN001972	AALB006860	Fe_Car_specific	Fe_Car_weak	Fe_Car_weak	Fe_Car_strong	1.0019	0.04965
MZ22503695	AGAP004745	AARA002633	AMIN007438	AALB007805	unbiased	unbiased	unbiased	unbiased	1.0915	0.07132
MZ22503696	AGAP009542	AARA011835	AMIN001918	AALB001335	unbiased	unbiased	unbiased	Ma_Car_weak	1.1608	0.0389
MZ22503698	AGAP005030	AARA003151	AMIN011518	AALB007832	Fe_RT_weak	Fe_RT_strong	unbiased	Fe_RT_weak	1.176	0.15527
MZ22503701	AGAP005881	AARA007641	AMIN010009	AALB004259	unbiased	Fe_RT_weak	unbiased	Fe_RT_weak	1.3063	0.11074
MZ22503703	AGAP001293	AARA001759	AMIN002189	AALB009195	Ma_RT_specific	Ma_RT_specific	Ma_RT_strong	Ma_RT_specific	0.9451	0.04395
MZ22503706	AGAP011434	AARA002867	AMIN008982	AALB010332	not_expressed	unbiased	Fe_Car_weak	Ma_Car_specific	0.9269	0.07409
MZ22503709	AGAP006747	AARA009084	AMIN010090	AALB006180	unbiased	unbiased	unbiased	Ma_RT_strong	1.095	0.10666
MZ22503710	AGAP006254	AARA007286	AMIN008077	AALB003240	unbiased	unbiased	unbiased	unbiased	0.8302	0.01067
MZ22503712	AGAP008251	AARA011309	AMIN006038	AALB000163	unbiased	Fe_RT_weak	unbiased	unbiased	0.9128	0.04824
MZ22503713	AGAP002498	AARA004365	AMIN002511	AALB002549	unbiased	unbiased	unbiased	unbiased	0.9256	0.04188
MZ22503716	AGAP004182	AARA009612	AMIN004172	AALB014862	not_expressed	Fe_RT_specific	Fe_RT_specific	not_expressed	1.5931	0.23863
MZ22503718	AGAP013249	AARA006925	AMIN003329	AALB007129	unbiased	unbiased	Ma_Car_specific	Ma_Ubi_weak	1.2086	0.14502
MZ22503720	AGAP003424	AARA001503	AMIN003854	AALB002850	unbiased	unbiased	unbiased	unbiased	0.8286	0.00798
MZ22503721	AGAP008357	AARA011203	AMIN005944	AALB001473	unbiased	unbiased	unbiased	Ma_Car_weak	0.9511	0.06001
MZ22503725	AGAP002959	AARA004775	AMIN003158	AALB008428	Fe_RT_weak	unbiased	Fe_RT_weak	Fe_RT_weak	1.0105	0.08518
MZ22503726	AGAP002902	AARA004719	AMIN000723	AALB009485	Fe_RT_weak	unbiased	unbiased	Fe_RT_weak	1.0415	0.05064
MZ22503728	AGAP009291	AARA000301	AMIN001733	AALB001465	unbiased	unbiased	unbiased	unbiased	0.9009	0.03981
MZ22503729	AGAP002014	AARA006930	AMIN003325	AALB007134	unbiased	unbiased	unbiased	unbiased	0.9836	0.08619
MZ22503732	AGAP010345	AARA005835	AMIN006540	AALB004009	unbiased	unbiased	unbiased	unbiased	1.0986	0.07648
MZ22503740	AGAP010198	AARA007130	AMIN001194	AALB007843	Fe_RT_weak	Fe_RT_strong	Fe_RT_weak	Fe_RT_weak	0.8828	0.0297
MZ22503741	AGAP004884	AARA006080	AMIN008178	AALB004742	Fe_RT_strong	Fe_RT_weak	Fe_RT_weak	Fe_RT_strong	0.9594	0.06331
MZ22503742	AGAP002951	AARA004770	AMIN003165	AALB010878	unbiased	unbiased	unbiased	unbiased	0.8729	0.04239
MZ22503743	AGAP005362	AARA002431	AMIN007402	AALB005721	Ma_RT_strong	Ma_RT_weak	unbiased	unbiased	1.1076	0.10872
MZ22503748	AGAP013262	AARA000385	AMIN005240	AALB007652	Ma_Car_weak	unbiased	unbiased	unbiased	1.2719	0.09689
MZ22503749	AGAP007914	AARA005213	AMIN007087	AALB001364	Fe_RT_specific	unbiased	Fe_RT_weak	Fe_RT_weak	1.2089	0.16913
MZ22503753	AGAP005155	AARA003026	AMIN007316	AALB004883	Fe_RT_weak	Fe_RT_weak	unbiased	unbiased	0.9576	0.08122
MZ22503755	AGAP002567	AARA004297	AMIN002575	AALB008225	unbiased	unbiased	unbiased	unbiased	0.8987	0.04635
MZ22503756	AGAP011255	AARA000177	AMIN008341	AALB010841	unbiased	unbiased	unbiased	unbiased	1.0365	0.07247
MZ22503757	AGAP005717	AARA005702	AMIN011024	AALB004163	unbiased	unbiased	unbiased	Ma_RT_specific	1.0228	0.08913
MZ22503758	AGAP009607	AARA011349	AMIN009835	AALB001782	unbiased	unbiased	unbiased	Fe_RT_strong	1.3488	0.19431
MZ22503760	AGAP012922	AARA010146	AMIN002579	AALB009029	Fe_RT_weak	Fe_RT_weak	Fe_RT_strong	unbiased	0.8654	0.03881
MZ22503762	AGAP007311	AARA007931	AMIN010552	AALB005483	unbiased	Fe_RT_weak	Fe_RT_weak	unbiased	1.1961	0.14872
MZ22503763	AGAP005656	AARA005743	AMIN010177	AALB005829	unbiased	unbiased	unbiased	Fe_Car_weak	0.9213	0.05604
MZ22503764	AGAP003156	AARA001258	AMIN004624	AALB009612	unbiased	unbiased	unbiased	unbiased	1.093	0.13509
MZ22503773	AGAP009441	AARA000196	AMIN001826	AALB001650	Fe_Car_weak	unbiased	unbiased	Fe_Car_weak	0.8352	0.02511
MZ22503778	AGAP004361	AARA005315	AMIN004753	AALB008460	unbiased	Fe_RT_weak	unbiased	Fe_RT_strong	1.5712	0.27794
MZ22503779	AGAP011570	AARA002723	AMIN008868	AALB010100	unbiased	unbiased	unbiased	unbiased	0.905	0.04994
MZ22503782	AGAP006592	AARA008466	AMIN007801	AALB005061	Ma_Car_weak	unbiased	Ma_Car_weak	Ma_Car_weak	1.0572	0.07931
MZ22503783	AGAP002680	AARA004162	AMIN003625	AALB008669	unbiased	unbiased	Fe_RT_weak	unbiased	0.9231	0.04449
MZ22503785	AGAP004521	AARA006443	AMIN004895	AALB002995	unbiased	unbiased	Fe_RT_weak	Fe_RT_weak	0.8524	0.03081
MZ22503787	AGAP003865	AARA009930	AMIN004046	AALB009634	unbiased	Ma_Car_weak	unbiased	unbiased	0.9521	0.05684
MZ22503789	AGAP010273	AARA007200	AMIN001119	AALB001282	unbiased	unbiased	Ma_RT_weak	unbiased	0.9554	0.04551
MZ22503791	AGAP001888	AARA007037	AMIN000458	AALB008828	unbiased	unbiased	unbiased	unbiased	0.8899	0.04055
MZ22503792	AGAP003432	AARA001509	AMIN000952	AALB002843	unbiased	unbiased	unbiased	Ma_RT_specific	1.0191	0.09676
MZ22503797	AGAP010012	AARA003761	AMIN006715	AALB000889	unbiased	unbiased	unbiased	unbiased	1.1496	0.10363
MZ22503798	AGAP006477	AARA008357	AMIN007891	AALB004724	Fe_RT_strong	Fe_RT_weak	unbiased	Fe_RT_strong	1.226	0.12533
MZ22503799	AGAP001685	AARA002135	AMIN003495	AALB008077	Fe_RT_weak	Fe_RT_weak	unbiased	Fe_RT_weak	1.0416	0.07412
MZ22503803	AGAP005849	AARA007663	AMIN011188	AALB006002	unbiased	unbiased	unbiased	unbiased	0.8624	0.03894
MZ22503805	AGAP012019	AARA000807	AMIN008340	AALB010247	unbiased	unbiased	unbiased	unbiased	0.9709	0.06268
MZ22503813	AGAP001330	AARA001792	AMIN002161	AALB009593	unbiased	unbiased	Fe_RT_weak	unbiased	0.986	0.07094
MZ22503814	AGAP003501	AARA001571	AMIN000894	AALB007208	not_expressed	not_expressed	Fe_RT_weak	Ma_RT_specific	0.8756	0.04367
MZ22503815	AGAP001322	AARA001785	AMIN002165	AALB009586	unbiased	unbiased	unbiased	Fe_Car_weak	1.0524	0.09756
MZ22503816	AGAP002231	AARA006710	AMIN000829	AALB009663	not_expressed	not_expressed	not_expressed	not_expressed	1.4186	0.20462
MZ22503818	AGAP008511	AARA011069	AMIN001453	AALB000713	not_expressed	not_expressed	not_expressed	not_expressed	1.0275	0.07537
MZ22503820	AGAP004843	AARA006119	AMIN011627	AALB004313	Fe_RT_weak	unbiased	unbiased	unbiased	1.2063	0.13044
MZ22503822	AGAP001952	AARA006986	AMIN000512	AALB002707	Ma_RT_specific	Ma_RT_specific	Ma_RT_strong	Ma_RT_specific	0.8659	0.04996
MZ22503825	AGAP011142	AARA005584	AMIN008436	AALB007071	unbiased	Ma_RT_weak	unbiased	unbiased	0.8903	0.03244
MZ22503829	AGAP003568	AARA006625	AMIN000169	AALB003544	Ma_Car_specific	unbiased	unbiased	Ma_Car_weak	0.8766	0.05326
MZ22503832	AGAP012115	AARA003212	AMIN008280	AALB003967	Fe_RT_weak	Fe_RT_weak	unbiased	unbiased	0.8257	0.01732
MZ22503833	AGAP002159	AARA006782	AMIN003107	AALB008201	Ma_Car_weak	unbiased	unbiased	unbiased	0.9878	0.13709
MZ22503836	AGAP003459	AARA001533	AMIN000936	AALB002825	Fe_RT_weak	Fe_RT_weak	Fe_RT_strong	Fe_RT_weak	0.8577	0.02295
MZ22503845	AGAP005003	AARA003597	AMIN011483	AALB007344	unbiased	unbiased	unbiased	unbiased	0.9042	0.05371
MZ22503848	AGAP010556	AARA000058	AMIN001313	AALB010231	unbiased	unbiased	unbiased	unbiased	0.9387	0.05495
MZ22503852	AGAP003283	AARA001363	AMIN000358	AALB009493	Ma_RT_strong	Ma_RT_strong	Ma_RT_specific	Ma_RT_weak	0.8698	0.04374
MZ22503853	AGAP004149	AARA009649	AMIN004208	AALB008455	not_expressed	unbiased	unbiased	Ma_RT_weak	1.0661	0.11156
MZ22503854	AGAP001267	AARA001735	AMIN002215	AALB009218	unbiased	unbiased	unbiased	unbiased	0.8321	0.01074
MZ22503858	AGAP011703	AARA000510	AMIN008758	AALB009788	not_expressed	not_expressed	not_expressed	not_expressed	1.1734	0.12134
MZ22503860	AGAP007646	AARA008209	AMIN010288	AALB006252	unbiased	unbiased	unbiased	unbiased	0.8964	0.02966
MZ22503861	AGAP010077	AARA003697	AMIN006646	AALB007945	not_expressed	Ma_RT_specific	unbiased	Ma_Car_weak	0.9089	0.04324
MZ22503864	AGAP013495	AARA011668	AMIN001228	AALB006836	Fe_RT_weak	unbiased	unbiased	Fe_RT_weak	1.414	0.10888
MZ22503868	AGAP009509	AARA011871	AMIN001881	AALB000197	Fe_RT_weak	Fe_RT_weak	unbiased	Fe_RT_weak	0.8782	0.03366
MZ22503869	AGAP002781	AARA004599	AMIN000789	AALB002281	unbiased	unbiased	unbiased	unbiased	0.8956	0.04129
MZ22503871	AGAP011252	AARA000173	AMIN008344	AALB010361	unbiased	unbiased	Fe_RT_weak	Fe_Car_weak	0.8821	0.02662
MZ22503873	AGAP000754	AARA010243	AMIN005145	AALB006737	Fe_RT_weak	Fe_RT_weak	Fe_RT_weak	Fe_RT_weak	1.2389	0.10339
MZ22503880	AGAP007204	AARA007846	AMIN010631	AALB005647	Ma_RT_weak	Ma_RT_weak	unbiased	unbiased	0.9392	0.06757
MZ22503881	AGAP004036	AARA009770	AMIN002605	AALB003354	Fe_RT_specific	Fe_RT_specific	Fe_RT_specific	Fe_RT_specific	1.114	0.14149
MZ22503884	AGAP004188	AARA009607	AMIN004167	AALB009451	Fe_RT_weak	Fe_RT_weak	unbiased	unbiased	1.2954	0.12205
MZ22503885	AGAP011705	AARA000513	AMIN008756	AALB010363	unbiased	unbiased	unbiased	unbiased	1.0245	0.11202
MZ22503886	AGAP001104	AARA001584	AMIN002361	AALB003778	Fe_RT_strong	Fe_RT_strong	Fe_RT_weak	Fe_RT_strong	1.2801	0.08711
MZ22503888	AGAP007915	AARA005211	AMIN007085	AALB001418	not_expressed	unbiased	unbiased	Ma_Car_specific	1.2038	0.17101
MZ22503895	AGAP007819	AARA012016	AMIN006407	AALB001162	Fe_RT_weak	unbiased	unbiased	Fe_RT_weak	1.2105	0.14489
MZ22503896	AGAP000070	AARA001106	AMIN002137	AALB006638	unbiased	unbiased	unbiased	unbiased	0.94	0.05786
MZ22503897	AGAP011044	AARA005478	AMIN008542	AALB010604	Ma_RT_strong	Ma_RT_strong	Ma_RT_strong	Ma_Car_weak	0.9677	0.07867
MZ22503900	AGAP001537	AARA001984	AMIN002429	AALB009140	Fe_RT_weak	unbiased	unbiased	Ma_RT_weak	1.0808	0.11514
MZ22503905	AGAP004557	AARA014568	AMIN004923	AALB002972	Fe_RT_strong	Fe_RT_strong	Fe_Ubi_weak	Fe_Ubi_weak	0.9749	0.07328
MZ22503910	AGAP007108	AARA007770	AMIN011247	AALB005764	unbiased	unbiased	unbiased	unbiased	0.9669	0.05666
MZ22503915	AGAP002238	AARA006700	AMIN000838	AALB009653	Ma_RT_strong	Fe_RT_weak	Fe_RT_weak	unbiased	1.22	0.12069
MZ22503918	AGAP003972	AARA009823	AMIN000317	AALB007258	Fe_RT_weak	Fe_RT_weak	unbiased	Ma_Car_weak	1.1075	0.11268
MZ22503920	AGAP003725	AARA010072	AMIN002971	AALB007122	Ma_RT_strong	Ma_RT_strong	unbiased	unbiased	0.8946	0.04524
MZ22503921	AGAP000472	AARA000407	AMIN005362	AALB007701	Ma_Car_weak	unbiased	unbiased	Ma_RT_strong	1.0133	0.07628
MZ22503922	AGAP010164	AARA007094	AMIN007242	AALB007897	unbiased	unbiased	unbiased	unbiased	0.8911	0.04145
MZ22503923	AGAP003765	AARA010026	AMIN002930	AALB002489	unbiased	not_expressed	unbiased	Ma_RT_specific	1.0672	0.11323
MZ22503925	AGAP010233	AARA007162	AMIN001158	AALB007877	unbiased	unbiased	Ma_RT_strong	unbiased	1.0358	0.07318
MZ22503927	AGAP008845	AARA009385	AMIN001602	AALB000472	unbiased	Fe_RT_weak	Fe_RT_strong	unbiased	1.6613	0.2145
MZ22503928	AGAP006655	AARA008530	AMIN007744	AALB004407	unbiased	Fe_RT_specific	unbiased	unbiased	1.0816	0.06311
MZ22503934	AGAP004434	AARA006357	AMIN004816	AALB008688	unbiased	unbiased	Ma_RT_weak	unbiased	0.8614	0.02375
MZ22503940	AGAP004477	AARA006402	AMIN004856	AALB008928	unbiased	unbiased	unbiased	unbiased	0.8861	0.03534
MZ22503946	AGAP005263	AARA002910	AMIN011610	AALB004866	unbiased	unbiased	unbiased	unbiased	1.0971	0.07195
MZ22503949	AGAP008227	AARA004908	AMIN006056	AALB000184	unbiased	unbiased	unbiased	unbiased	0.8227	0.01248
MZ22503957	AGAP007677	AARA008233	AMIN010316	AALB005424	not_expressed	not_expressed	not_expressed	not_expressed	1.0548	0.09146
MZ22503958	AGAP003496	AARA001568	AMIN000897	AALB007205	not_expressed	unbiased	unbiased	unbiased	1.0912	0.13299
MZ22503960	AGAP012377	AARA003452	AMIN008948	AALB003788	unbiased	unbiased	unbiased	Fe_RT_weak	0.953	0.05954
MZ22503962	AGAP010342	AARA003164	AMIN006536	AALB007007	unbiased	unbiased	unbiased	unbiased	1.2358	0.10051
MZ22503963	AGAP000894	AARA002582	AMIN001074	AALB006557	Fe_RT_weak	unbiased	Fe_RT_weak	unbiased	1.4436	0.12063
MZ22503966	AGAP012031	AARA000824	AMIN008216	AALB009771	Ma_RT_specific	unbiased	unbiased	unbiased	1.201	0.14803
MZ22503967	AGAP004409	AARA005359	AMIN004796	AALB003484	unbiased	unbiased	unbiased	not_expressed	0.9549	0.05526
MZ22503970	AGAP002094	AARA006850	AMIN000646	AALB009284	unbiased	unbiased	Fe_RT_weak	unbiased	1.1457	0.16062
MZ22503972	AGAP009274	AARA000318	AMIN001718	AALB001449	unbiased	Fe_RT_specific	unbiased	Ma_Car_weak	0.9608	0.03061
MZ22503977	AGAP000452	AARA010670	AMIN005597	AALB006576	unbiased	unbiased	unbiased	unbiased	1.3619	0.15414
MZ22503984	AGAP003618	AARA010178	AMIN002789	AALB009282	unbiased	unbiased	unbiased	unbiased	1.0931	0.09047
MZ22503987	AGAP012357	AARA003436	AMIN009340	AALB010424	unbiased	Ma_Car_weak	Fe_RT_weak	not_expressed	0.9853	0.14485
MZ22503989	AGAP003593	AARA006651	AMIN000195	AALB008187	unbiased	unbiased	unbiased	Fe_RT_strong	0.9066	0.03833
MZ22503993	AGAP009594	AARA011789	AMIN009847	AALB000526	Ma_RT_specific	Ma_RT_specific	Ma_RT_specific	Ma_Ubi_specific	1.2722	0.12771
MZ22504001	AGAP007103	AARA007765	AMIN011242	AALB004546	Ma_Car_weak	unbiased	unbiased	unbiased	0.8623	0.0233
MZ22504003	AGAP002100	AARA006844	AMIN000639	AALB002620	Ma_RT_weak	Ma_RT_weak	Ma_RT_weak	unbiased	1.0871	0.11191
MZ22504006	AGAP001328	AARA001789	AMIN002162	AALB009589	unbiased	unbiased	unbiased	unbiased	1.0363	0.06094
MZ22504008	AGAP011127	AARA005564	AMIN008455	AALB010764	Fe_RT_weak	unbiased	Fe_RT_weak	unbiased	1.377	0.14806
MZ22504009	AGAP010281	AARA007207	AMIN001111	AALB002936	Ma_Car_weak	unbiased	Ma_Car_weak	Ma_Car_weak	0.9385	0.02119
MZ22504013	AGAP003297	AARA001377	AMIN000345	AALB008078	unbiased	unbiased	unbiased	Fe_RT_weak	1.1412	0.16972
MZ22504014	AGAP006096	AARA007425	AMIN009940	AALB006059	Fe_Car_weak	unbiased	unbiased	unbiased	0.8713	0.034
MZ22504016	AGAP009980	AARA003796	AMIN006746	AALB000203	Fe_RT_weak	Fe_RT_weak	Fe_RT_weak	unbiased	1.0173	0.0725
MZ22504019	AGAP008469	AARA011105	AMIN009808	AALB000605	unbiased	unbiased	unbiased	unbiased	1.034	0.07226
MZ22504022	AGAP000577	AARA010468	AMIN005321	AALB006834	unbiased	unbiased	Fe_Car_weak	unbiased	0.8881	0.02129
MZ22504023	AGAP009791	AARA003984	AMIN009525	AALB000814	unbiased	unbiased	unbiased	unbiased	0.9059	0.05168
MZ22504026	AGAP010680	AARA009024	AMIN008682	AALB010727	Fe_RT_weak	Fe_RT_weak	unbiased	unbiased	1.1396	0.13202
MZ22504030	AGAP000974	AARA011717	AMIN005106	AALB006762	unbiased	unbiased	unbiased	Ma_Car_weak	0.8646	0.02483
MZ22504032	AGAP009014	AARA009582	AMIN001564	AALB008044	not_expressed	not_expressed	not_expressed	not_expressed	1.1423	0.16329
MZ22504043	AGAP000815	AARA001161	AMIN005625	AALB006392	unbiased	unbiased	unbiased	unbiased	0.89	0.02761
MZ22504048	AGAP009743	AARA004026	AMIN009485	AALB000098	Fe_RT_weak	Fe_RT_strong	Fe_RT_strong	Fe_RT_weak	0.9688	0.07413
MZ22504049	AGAP011893	AARA000692	AMIN008577	AALB003730	unbiased	unbiased	unbiased	unbiased	1.2236	0.15926
MZ22504051	AGAP003010	AARA004838	AMIN003718	AALB009121	not_expressed	Ma_RT_specific	unbiased	not_expressed	1.059	0.13305
MZ22504052	AGAP009645	AARA011389	AMIN001501	AALB001874	unbiased	unbiased	unbiased	Fe_RT_weak	0.9329	0.06665
MZ22504053	AGAP005259	AARA002914	AMIN011606	AALB004870	Fe_RT_weak	Fe_RT_strong	Fe_RT_weak	Fe_RT_weak	1.4648	0.1942
MZ22504057	AGAP011273	AARA006294	AMIN007055	AALB010535	Fe_RT_weak	Fe_RT_strong	unbiased	Fe_RT_weak	0.9009	0.02961
MZ22504058	AGAP010048	AARA003728	AMIN006683	AALB001075	unbiased	Ma_Car_weak	unbiased	unbiased	0.8776	0.02648
MZ22504061	AGAP002607	AARA004251	AMIN003967	AALB009683	Fe_RT_weak	Fe_RT_weak	Fe_RT_weak	unbiased	1.4573	0.15299
MZ22504062	AGAP006328	AARA007241	AMIN008028	AALB004090	Fe_RT_weak	unbiased	unbiased	Fe_RT_weak	0.8243	0.00956
MZ22504063	AGAP013468	AARA001566	AMIN000898	AALB007204	unbiased	Fe_RT_strong	Fe_RT_specific	unbiased	1.15	0.12538
MZ22504067	AGAP001462	AARA001916	AMIN002154	AALB009599	unbiased	unbiased	Fe_RT_weak	unbiased	1.1536	0.13921
MZ22504070	AGAP012369	AARA003446	AMIN008953	AALB003783	unbiased	unbiased	unbiased	unbiased	0.8658	0.02032
MZ22504075	AGAP009069	AARA008611	AMIN009615	AALB000043	unbiased	Ma_RT_weak	unbiased	unbiased	1.4996	0.29877
MZ22504078	AGAP010444	AARA005935	AMIN005001	AALB007609	unbiased	unbiased	unbiased	unbiased	1.2142	0.11399
MZ22504079	AGAP005519	AARA002291	AMIN010844	AALB005961	Ma_RT_specific	Ma_RT_specific	Ma_RT_specific	Ma_RT_specific	1.1902	0.16606
MZ22504080	AGAP001858	AARA007068	AMIN000431	AALB002233	unbiased	unbiased	unbiased	Ma_Car_weak	0.9224	0.05395
MZ22504084	AGAP003312	AARA001394	AMIN000328	AALB003641	Ma_RT_weak	unbiased	Ma_RT_weak	Ma_Car_weak	0.9071	0.06051
MZ22504085	AGAP011058	AARA005490	AMIN008531	AALB010350	unbiased	unbiased	Fe_RT_strong	unbiased	1.4735	0.23262
MZ22504087	AGAP001943	AARA006994	AMIN000503	AALB002717	unbiased	Fe_RT_weak	unbiased	Fe_RT_strong	0.956	0.05614
MZ22504089	AGAP006669	AARA008547	AMIN011005	AALB004131	Fe_RT_weak	Fe_RT_weak	unbiased	Fe_RT_strong	1.0408	0.10762
MZ22504095	AGAP006974	AARA009297	AMIN009967	AALB005549	unbiased	unbiased	unbiased	unbiased	0.9862	0.09278
MZ22504097	AGAP028141	AARA010898	AMIN001343	AALB000953	Ma_Ubi_weak	unbiased	unbiased	unbiased	1.1182	0.10204
MZ22504099	AGAP006774	AARA009108	AMIN010067	AALB005261	unbiased	unbiased	unbiased	unbiased	0.8987	0.04431
MZ22504101	AGAP003018	AARA004844	AMIN003724	AALB002398	unbiased	unbiased	unbiased	unbiased	0.838	0.01304
MZ22504106	AGAP002485	AARA004380	AMIN002494	AALB007170	not_expressed	unbiased	Ma_RT_specific	not_expressed	1.0657	0.14933
MZ22504108	AGAP010234	AARA007163	AMIN001157	AALB007878	unbiased	unbiased	Fe_RT_weak	unbiased	1.0881	0.11282
MZ22504112	AGAP003151	AARA001254	AMIN004628	AALB008924	Ma_RT_specific	Ma_RT_specific	unbiased	Ma_RT_specific	0.9812	0.07647
MZ22504114	AGAP027995	AARA005940	AMIN005007	AALB007616	Fe_RT_weak	unbiased	Fe_RT_weak	Fe_RT_weak	1.178	0.12058
MZ22504115	AGAP002336	AARA004536	AMIN000207	AALB009062	unbiased	unbiased	unbiased	unbiased	0.9688	0.07978
MZ22504118	AGAP010426	AARA005915	AMIN004983	AALB007587	unbiased	unbiased	unbiased	Fe_RT_weak	1.0165	0.06638
MZ22504125	AGAP010473	AARA005967	AMIN005032	AALB003990	Ma_Car_specific	unbiased	Ma_Car_weak	unbiased	1.0448	0.06742
MZ22504127	AGAP004957	AARA003558	AMIN011452	AALB007444	Fe_RT_strong	Fe_RT_strong	Fe_RT_weak	unbiased	1.1049	0.10234
MZ22504128	AGAP004503	AARA006425	AMIN004877	AALB003563	Fe_RT_specific	Fe_RT_weak	Fe_RT_strong	unbiased	1.4581	0.26097
MZ22504134	AGAP003222	AARA001316	AMIN000404	AALB009535	unbiased	unbiased	unbiased	unbiased	1.1855	0.15154
MZ22504137	AGAP011954	AARA000742	AMIN008622	AALB003775	unbiased	unbiased	unbiased	unbiased	0.9751	0.05063
MZ22504138	AGAP009688	AARA000931	AMIN001544	AALB000536	Fe_RT_weak	unbiased	unbiased	unbiased	1.0603	0.08417
MZ22504139	AGAP011095	AARA005524	AMIN008498	AALB010746	Ma_Car_weak	Ma_Car_weak	Ma_Car_weak	Ma_Car_weak	1.0794	0.13227
MZ22504144	AGAP009160	AARA008697	AMIN009702	AALB000087	Ma_Car_weak	Ma_Car_weak	unbiased	unbiased	0.92	0.0458
MZ22504145	AGAP000848	AARA002533	AMIN002069	AALB006924	Ma_Car_weak	unbiased	unbiased	Ma_Car_weak	0.9846	0.06543
MZ22504147	AGAP001751	AARA002201	AMIN000765	AALB008121	Fe_RT_weak	Fe_RT_strong	unbiased	Fe_RT_strong	0.9186	0.05293
MZ22504148	AGAP008509	AARA011072	AMIN001456	AALB000716	Fe_RT_strong	Fe_RT_strong	unbiased	Fe_Ubi_weak	0.9824	0.0994
MZ22504149	AGAP000236	AARA010572	AMIN005514	AALB006515	Ma_Car_weak	unbiased	unbiased	Ma_Car_weak	0.9512	0.0738
MZ22504153	AGAP011498	AARA002802	AMIN009040	AALB010048	Ma_Car_weak	Ma_Car_weak	unbiased	Ma_Car_weak	0.8489	0.02662
MZ22504154	AGAP005006	AARA003600	AMIN011486	AALB005415	unbiased	unbiased	unbiased	unbiased	0.9508	0.05142
MZ22504158	AGAP010259	AARA007184	AMIN001133	AALB008770	Ma_Car_weak	unbiased	Ma_Car_weak	Ma_Car_weak	0.9425	0.09656
MZ22504169	AGAP005905	AARA007614	AMIN010719	AALB004442	unbiased	unbiased	unbiased	not_expressed	1.078	0.13486
MZ22504174	AGAP007642	AARA008205	AMIN010283	AALB006248	Ma_Car_weak	Ma_Car_weak	unbiased	unbiased	0.8621	0.0192
MZ22504175	AGAP011537	AARA002759	AMIN008903	AALB007441	unbiased	Ma_RT_weak	unbiased	unbiased	1.0226	0.08897
MZ22504176	AGAP002300	AARA004579	AMIN004582	AALB008622	unbiased	unbiased	Fe_RT_weak	Fe_RT_weak	1.1801	0.14729
MZ22504177	AGAP012241	AARA003327	AMIN006925	AALB010191	unbiased	unbiased	Ma_Car_specific	Ma_Car_specific	0.9039	0.03998
MZ22504178	AGAP001005	AARA011743	AMIN005397	AALB006688	not_expressed	not_expressed	unbiased	not_expressed	1.2366	0.15763
MZ22504180	AGAP001731	AARA002182	AMIN003540	AALB008586	unbiased	unbiased	unbiased	Fe_RT_weak	0.8636	0.07052
MZ22504181	AGAP011780	AARA000590	AMIN004291	AALB010509	unbiased	unbiased	unbiased	unbiased	0.9239	0.05365
MZ22504182	AGAP002048	AARA006898	AMIN003356	AALB008102	Fe_RT_weak	Fe_RT_weak	unbiased	Fe_RT_strong	1.4401	0.17773
MZ22504184	AGAP005941	AARA007578	AMIN010988	AALB005925	not_expressed	Fe_Car_strong	Fe_Car_strong	Fe_Car_strong	0.9546	0.10339
MZ22504185	AGAP013178	AARA006907	AMIN003345	AALB008878	unbiased	unbiased	unbiased	unbiased	1.1863	0.1358
MZ22504191	AGAP005133	AARA003046	AMIN007296	AALB005888	unbiased	unbiased	unbiased	unbiased	1.2158	0.15003
MZ22504192	AGAP003970	AARA009825	AMIN000315	AALB007260	unbiased	unbiased	unbiased	unbiased	0.9371	0.08062
MZ22504193	AGAP011046	AARA005481	AMIN008539	AALB010601	unbiased	not_expressed	Fe_Car_specific	not_expressed	0.9183	0.06971
MZ22504201	AGAP007683	AARA008240	AMIN010323	AALB005418	unbiased	unbiased	unbiased	unbiased	0.8428	0.01651
MZ22504203	AGAP005777	AARA005647	AMIN011075	AALB006092	unbiased	unbiased	unbiased	Ma_RT_weak	0.8726	0.03658
MZ22504204	AGAP013499	AARA004803	AMIN003684	AALB009091	unbiased	Fe_RT_specific	unbiased	Fe_RT_weak	1.0675	0.08493
MZ22504207	AGAP005425	AARA002370	AMIN011374	AALB006031	Ma_Car_weak	unbiased	unbiased	unbiased	0.8892	0.0533
MZ22504212	AGAP001901	AARA007028	AMIN000466	AALB008820	unbiased	Fe_RT_specific	unbiased	Fe_RT_weak	1.172	0.11891
MZ22504214	AGAP008620	AARA010975	AMIN009126	AALB002012	unbiased	unbiased	unbiased	Fe_RT_weak	0.9423	0.05481
MZ22504216	AGAP006598	AARA008472	AMIN007796	AALB005055	Ma_Car_weak	unbiased	unbiased	Ma_Car_weak	1.0418	0.09557
MZ22504218	AGAP002695	AARA004150	AMIN003613	AALB002060	Ma_RT_strong	Ma_RT_weak	unbiased	unbiased	0.9636	0.08214
MZ22504220	AGAP007217	AARA007860	AMIN010618	AALB005572	Fe_RT_weak	unbiased	Fe_Ubi_weak	Fe_RT_weak	0.8403	0.0145
MZ22504221	AGAP005763	AARA005660	AMIN011063	AALB006106	Fe_RT_strong	Fe_RT_specific	Fe_RT_strong	Fe_RT_strong	1.158	0.09569
MZ22504223	AGAP010331	AARA003491	AMIN006527	AALB006996	unbiased	unbiased	Fe_RT_weak	unbiased	0.941	0.05483
MZ22504224	AGAP005567	AARA002245	AMIN010883	AALB004227	unbiased	unbiased	Ma_Ubi_weak	unbiased	1.0936	0.08598
MZ22504229	AGAP008007	AARA005116	AMIN006259	AALB000208	Fe_RT_weak	Fe_RT_weak	Fe_RT_weak	unbiased	0.8445	0.03076
MZ22504231	AGAP012386	AARA003460	AMIN008937	AALB003714	unbiased	unbiased	Fe_Car_weak	unbiased	1.3082	0.17707
MZ22504235	AGAP010917	AARA005387	AMIN009297	AALB009871	unbiased	unbiased	Fe_RT_weak	unbiased	1.0388	0.11269
MZ22504238	AGAP012183	AARA003278	AMIN004450	AALB010613	Ma_RT_weak	Ma_RT_weak	unbiased	unbiased	0.849	0.0232
MZ22504239	AGAP009727	AARA004043	AMIN009468	AALB000115	Fe_RT_weak	Fe_RT_weak	unbiased	unbiased	0.9937	0.09063
MZ22504240	AGAP009840	AARA003931	AMIN009566	AALB000633	unbiased	unbiased	unbiased	unbiased	0.9044	0.04168
MZ22504241	AGAP001612	AARA002054	AMIN003420	AALB003926	unbiased	unbiased	unbiased	unbiased	0.9344	0.05976
MZ22504243	AGAP009438	AARA000199	AMIN001823	AALB001653	Fe_Ubi_weak	unbiased	Fe_Ubi_weak	Fe_Ubi_weak	0.9978	0.07619
MZ22504247	AGAP005317	AARA002473	AMIN007582	AALB004172	unbiased	unbiased	unbiased	unbiased	1.0372	0.07072
MZ22504248	AGAP028205	AARA006351	AMIN014126	AALB009837	not_expressed	unbiased	Fe_RT_weak	unbiased	1.7301	0.16969
MZ22504250	AGAP001482	AARA001931	AMIN002379	AALB009252	unbiased	unbiased	unbiased	Fe_RT_weak	1.0357	0.08897
MZ22504251	AGAP008194	AARA004937	AMIN006086	AALB000485	Fe_RT_weak	unbiased	Fe_RT_weak	unbiased	1.458	0.16401
MZ22504253	AGAP006017	AARA007510	AMIN010927	AALB004288	Fe_RT_weak	Fe_RT_weak	unbiased	Fe_RT_weak	1.197	0.22881
MZ22504254	AGAP009028	AARA006560	AMIN007174	AALB001211	unbiased	unbiased	unbiased	Ma_Car_weak	0.9622	0.07431
MZ22504255	AGAP006623	AARA008500	AMIN007772	AALB005588	unbiased	unbiased	unbiased	Ma_RT_weak	0.8722	0.03793
MZ22504256	AGAP001402	AARA001850	AMIN000578	AALB002358	Fe_RT_weak	Fe_RT_weak	unbiased	Fe_RT_weak	0.866	0.02055
MZ22504257	AGAP001759	AARA002209	AMIN000758	AALB008196	unbiased	unbiased	unbiased	unbiased	0.8258	0.01108
MZ22504258	AGAP001827	AARA007072	AMIN000427	AALB002227	unbiased	unbiased	Fe_Car_weak	not_expressed	0.9705	0.07072
MZ22504259	AGAP009098	AARA008635	AMIN009641	AALB001718	unbiased	unbiased	Ma_RT_specific	Ma_RT_specific	1.1303	0.13374
MZ22504262	AGAP005250	AARA002924	AMIN011597	AALB004325	Ma_RT_weak	unbiased	unbiased	Ma_RT_weak	1.1066	0.09887
MZ22504265	AGAP001632	AARA002077	AMIN003442	AALB008648	unbiased	unbiased	unbiased	Ma_Car_weak	1.0223	0.04059
MZ22504267	AGAP012350	AARA003426	AMIN009349	AALB009978	unbiased	unbiased	unbiased	Fe_Car_weak	0.8776	0.03503
MZ22504268	AGAP008803	AARA010798	AMIN007181	AALB000773	Ma_RT_weak	unbiased	unbiased	unbiased	0.8848	0.06898
MZ22504272	AGAP012190	AARA003283	AMIN004458	AALB010618	Ma_Car_weak	unbiased	Ma_Ubi_weak	Ma_RT_specific	1.0211	0.13245
MZ22504274	AGAP003823	AARA009968	AMIN002878	AALB003120	Ma_Car_weak	unbiased	unbiased	unbiased	0.8945	0.04174
MZ22504280	AGAP008252	AARA011308	AMIN006037	AALB000162	unbiased	Ma_RT_strong	unbiased	unbiased	0.9098	0.0331
MZ22504282	AGAP007659	AARA008220	AMIN010300	AALB005441	not_expressed	not_expressed	not_expressed	unbiased	0.9365	0.08266
MZ22504283	AGAP002734	AARA004112	AMIN003581	AALB008947	unbiased	unbiased	unbiased	unbiased	1.0052	0.10559
MZ22504290	AGAP002106	AARA006836	AMIN000630	AALB002614	unbiased	unbiased	unbiased	unbiased	1.1302	0.14026
MZ22504292	AGAP011400	AARA002893	AMIN009324	AALB003963	Ma_RT_specific	Ma_RT_specific	unbiased	unbiased	1.0255	0.07309
MZ22504295	AGAP002278	AARA004060	AMIN004558	AALB003910	unbiased	unbiased	unbiased	unbiased	0.9025	0.03667
MZ22504296	AGAP005002	AARA003596	AMIN011482	AALB007345	unbiased	not_expressed	unbiased	Ma_Car_specific	0.9873	0.09471
MZ22504300	AGAP002840	AARA004661	AMIN003235	AALB009036	unbiased	unbiased	unbiased	unbiased	1.5745	0.21103
MZ22504301	AGAP007342	AARA007960	AMIN010525	AALB004511	unbiased	unbiased	unbiased	unbiased	0.9936	0.04325
MZ22504304	AGAP009172	AARA008710	AMIN009717	AALB000352	unbiased	unbiased	unbiased	unbiased	0.8598	0.02462
MZ22504305	AGAP003709	AARA010086	AMIN004713	AALB002775	Ma_Car_weak	unbiased	unbiased	Ma_Car_weak	0.8363	0.03636
MZ22504306	AGAP008262	AARA011297	AMIN006027	AALB000154	Ma_RT_specific	Ma_RT_specific	Ma_RT_specific	Ma_RT_specific	0.9919	0.05225
MZ22504313	AGAP002798	AARA004619	AMIN003902	AALB002296	not_expressed	not_expressed	not_expressed	unbiased	0.9097	0.06832
MZ22504316	AGAP012313	AARA003394	AMIN006861	AALB010506	unbiased	Ma_RT_strong	unbiased	unbiased	1.1023	0.08491
MZ22504318	AGAP000529	AARA010527	AMIN005275	AALB006454	unbiased	unbiased	unbiased	unbiased	0.987	0.04203
MZ22504320	AGAP007796	AARA011995	AMIN006386	AALB000391	unbiased	unbiased	unbiased	unbiased	0.8486	0.01865
MZ22504325	AGAP002802	AARA004622	AMIN003905	AALB008888	unbiased	unbiased	unbiased	unbiased	0.8691	0.04765
MZ22504328	AGAP006206	AARA007325	AMIN011328	AALB004687	Ma_RT_strong	Ma_RT_strong	Ma_RT_specific	Fe_Car_strong	1.0268	0.07223
MZ22504329	AGAP009129	AARA008671	AMIN009674	AALB001683	Ma_RT_specific	Ma_RT_specific	Ma_RT_specific	Ma_RT_specific	0.9521	0.04023
MZ22504330	AGAP002381	AARA004494	AMIN004671	AALB002747	unbiased	unbiased	Ma_Car_weak	unbiased	0.8504	0.02748
MZ22504337	AGAP008940	AARA009497	AMIN009383	AALB000310	Ma_Ubi_weak	Ma_Car_weak	unbiased	unbiased	0.8782	0.04778
MZ22504342	AGAP009403	AARA000221	AMIN001801	AALB000439	unbiased	unbiased	Ma_RT_strong	Ma_Car_weak	0.9918	0.0557
MZ22504343	AGAP001546	AARA001992	AMIN002436	AALB009131	unbiased	Ma_RT_weak	unbiased	Ma_Car_weak	1.103	0.11957
MZ22504345	AGAP012125	AARA003225	AMIN008293	AALB004055	Fe_RT_weak	Fe_RT_weak	Fe_RT_strong	Fe_RT_strong	1.0985	0.12533
MZ22504346	AGAP010267	AARA007194	AMIN001124	AALB001281	unbiased	unbiased	Fe_RT_weak	Fe_RT_weak	0.946	0.05851
MZ22504347	AGAP002224	AARA006717	AMIN000822	AALB009668	unbiased	unbiased	unbiased	unbiased	1.0235	0.07368
MZ22504348	AGAP006120	AARA007400	AMIN010691	AALB005676	unbiased	unbiased	unbiased	unbiased	1.044	0.08763
MZ22504349	AGAP013150	AARA009760	AMIN002615	AALB003343	Ma_RT_specific	Ma_RT_specific	Ma_RT_specific	not_expressed	1.1378	0.15493
MZ22504350	AGAP002518	AARA004347	AMIN002527	AALB009162	unbiased	Fe_Car_strong	Fe_Car_strong	Fe_Car_strong	0.8527	0.01906
MZ22504356	AGAP003818	AARA009972	AMIN002882	AALB003124	unbiased	unbiased	unbiased	unbiased	1.2088	0.14169
MZ22504359	AGAP007221	AARA007864	AMIN010614	AALB005575	unbiased	unbiased	unbiased	unbiased	1.3511	0.18476
MZ22504362	AGAP011328	AARA006235	AMIN004227	AALB009825	unbiased	Fe_RT_weak	Fe_RT_weak	Fe_RT_weak	0.9933	0.0438
MZ22504371	AGAP028144	AARA012015	AMIN006406	AALB001164	not_expressed	Ma_Ubi_weak	unbiased	unbiased	1.0341	0.07778
MZ22504372	AGAP000707	AARA010340	AMIN005192	AALB006701	unbiased	unbiased	unbiased	unbiased	1.6642	0.2262
MZ22504384	AGAP008656	AARA010942	AMIN009089	AALB000910	unbiased	unbiased	unbiased	Ma_Car_weak	1.0103	0.04744
MZ22504385	AGAP010610	AARA000031	AMIN004531	AALB010414	unbiased	unbiased	unbiased	unbiased	1.0007	0.08194
MZ22504386	AGAP009284	AARA000307	AMIN001727	AALB001458	Fe_RT_strong	Fe_RT_strong	unbiased	Fe_RT_weak	0.8828	0.04536
MZ22504390	AGAP006889	AARA009213	AMIN007661	AALB005707	Fe_RT_weak	unbiased	unbiased	unbiased	1.0444	0.10004
MZ22504391	AGAP001165	AARA001635	AMIN002306	AALB009410	Ma_RT_specific	Ma_RT_specific	Ma_RT_specific	unbiased	1.334	0.18258
MZ22504398	AGAP000319	AARA010655	AMIN001950	AALB006556	Fe_RT_weak	Fe_RT_strong	Fe_RT_weak	Fe_RT_strong	1.1426	0.11241
MZ22504401	AGAP009283	AARA000308	AMIN001726	AALB001456	Fe_RT_weak	Fe_RT_strong	Fe_RT_weak	Fe_RT_weak	0.8451	0.03044
MZ22504409	AGAP002800	AARA004620	AMIN003904	AALB002297	unbiased	unbiased	unbiased	unbiased	0.9881	0.09271
MZ22504412	AGAP006643	AARA008519	AMIN007754	AALB004828	unbiased	unbiased	unbiased	Fe_Car_weak	1.0418	0.0924
MZ22504414	AGAP001791	AARA000447	AMIN000691	AALB002872	unbiased	unbiased	unbiased	unbiased	0.8837	0.0425
MZ22504415	AGAP011218	AARA000143	AMIN008366	AALB010582	Ma_Car_weak	unbiased	Ma_Car_weak	Ma_Car_weak	0.9704	0.04196
MZ22504417	AGAP005341	AARA002449	AMIN007385	AALB005908	unbiased	unbiased	Ma_Car_weak	Ma_RT_strong	0.8444	0.02716
MZ22504418	AGAP028114	AARA008763	AMIN009760	AALB014013	Ma_RT_specific	Ma_RT_specific	Ma_RT_specific	Ma_RT_strong	1.0325	0.06694
MZ22504420	AGAP004265	AARA011534	AMIN004086	AALB008092	unbiased	Fe_RT_weak	Fe_RT_weak	Fe_RT_weak	1.28	0.15299
MZ22504422	AGAP003961	AARA009835	AMIN000305	AALB002049	unbiased	Fe_RT_weak	unbiased	Fe_RT_weak	1.4705	0.23795
MZ22504428	AGAP002153	AARA006787	AMIN003112	AALB002251	unbiased	Fe_RT_weak	unbiased	Fe_RT_weak	1.3283	0.22142
MZ22504429	AGAP000875	AARA002561	AMIN005800	AALB006664	Fe_RT_specific	Fe_RT_specific	unbiased	unbiased	1.2437	0.12971
MZ22504430	AGAP009577	AARA011804	AMIN009862	AALB000511	Ma_Car_weak	unbiased	unbiased	Ma_Car_weak	1.1926	0.08578
MZ22504433	AGAP028041	AARA006259	AMIN009182	AALB007404	Ma_Ubi_weak	unbiased	Ma_Ubi_weak	Ma_Car_weak	1.0658	0.11319
MZ22504436	AGAP003268	AARA001349	AMIN000370	AALB009505	unbiased	unbiased	unbiased	unbiased	1.1078	0.14779
MZ22504437	AGAP006382	AARA000892	AMIN007985	AALB004893	unbiased	unbiased	unbiased	unbiased	1.0489	0.11126
MZ22504445	AGAP010292	AARA008800	AMIN001102	AALB002926	unbiased	unbiased	Fe_RT_weak	unbiased	0.8941	0.01767
MZ22504447	AGAP003125	AARA001226	AMIN004657	AALB003432	unbiased	unbiased	Fe_RT_weak	unbiased	0.9621	0.08582
MZ22504448	AGAP008748	AARA010850	AMIN001385	AALB001089	unbiased	unbiased	Fe_RT_weak	Fe_RT_weak	0.8758	0.03513
MZ22504450	AGAP005536	AARA002277	AMIN010859	AALB006120	Ma_Car_weak	unbiased	unbiased	Ma_Car_weak	0.9203	0.06492
MZ22504454	AGAP007852	AARA012050	AMIN007151	AALB001986	unbiased	unbiased	unbiased	unbiased	0.8339	0.02818
MZ22504455	AGAP001404	AARA001852	AMIN000580	AALB002360	Fe_RT_strong	Fe_RT_weak	Fe_RT_strong	Fe_RT_weak	1.0888	0.18372
MZ22504459	AGAP009273	AARA000319	AMIN001717	AALB001448	unbiased	unbiased	unbiased	unbiased	1.3494	0.18282
MZ22504460	AGAP000255	AARA010593	AMIN005803	AALB006581	Ma_Car_weak	unbiased	unbiased	unbiased	0.8916	0.02172
MZ22504469	AGAP008604	AARA010987	AMIN009142	AALB000062	unbiased	unbiased	unbiased	Fe_Ubi_weak	0.8545	0.0237
MZ22504472	AGAP010219	AARA007150	AMIN001172	AALB007864	Fe_RT_strong	Fe_RT_weak	Fe_RT_strong	Fe_RT_strong	0.8861	0.03244
MZ22504473	AGAP001802	AARA000433	AMIN000676	AALB002200	unbiased	unbiased	unbiased	unbiased	0.8299	0.01236
MZ22504474	AGAP003847	AARA009952	AMIN004069	AALB003089	Ma_RT_weak	Ma_RT_weak	unbiased	unbiased	1.1044	0.11466
MZ22504476	AGAP008310	AARA011258	AMIN005991	AALB001540	unbiased	unbiased	unbiased	Fe_Car_weak	1.0423	0.06597
MZ22504479	AGAP012048	AARA000836	AMIN008228	AALB010667	Ma_Car_weak	unbiased	Fe_Car_weak	Fe_Car_weak	0.8216	0.01752
MZ22504480	AGAP010115	AARA003671	AMIN006621	AALB007924	unbiased	not_expressed	unbiased	unbiased	1.0394	0.09515
MZ22504481	AGAP005037	AARA003143	AMIN011524	AALB007305	Ma_Ubi_weak	unbiased	unbiased	Ma_Car_weak	0.9437	0.0536
MZ22504483	AGAP008764	AARA010833	AMIN001403	AALB000753	Ma_RT_specific	unbiased	unbiased	Ma_Car_weak	0.8666	0.02252
MZ22504493	AGAP001917	AARA007014	AMIN000481	AALB008809	unbiased	unbiased	unbiased	unbiased	0.9559	0.05221
MZ22504494	AGAP001485	AARA001935	AMIN002384	AALB009247	Ma_RT_specific	unbiased	unbiased	Ma_RT_specific	0.8431	0.01979
MZ22504499	AGAP004224	AARA011580	AMIN004130	AALB008395	unbiased	unbiased	unbiased	unbiased	1.0198	0.08052
MZ22504501	AGAP001867	AARA007056	AMIN000441	AALB008843	unbiased	unbiased	unbiased	unbiased	1.0581	0
MZ22504507	AGAP004292	AARA011507	AMIN003006	AALB009015	unbiased	unbiased	unbiased	unbiased	0.8212	0.00602
MZ22504508	AGAP008736	AARA010862	AMIN001375	AALB001102	unbiased	unbiased	unbiased	Ma_RT_strong	1.5571	0.25002
MZ22504509	AGAP006324	AARA007245	AMIN008033	AALB004083	unbiased	unbiased	Ma_RT_specific	unbiased	0.8787	0.02384
MZ22504513	AGAP009226	AARA008759	AMIN009757	AALB000148	unbiased	Fe_RT_weak	unbiased	Ma_RT_weak	1.5116	0.28552
MZ22504517	AGAP011033	AARA005463	AMIN004356	AALB009915	not_expressed	not_expressed	not_expressed	unbiased	1.0842	0.1285
MZ22504521	AGAP008304	AARA011264	AMIN005996	AALB001544	Ma_RT_weak	Ma_RT_strong	Ma_Ubi_weak	unbiased	0.8675	0.039
MZ22504522	AGAP000112	AARA001056	AMIN005077	AALB006706	unbiased	unbiased	unbiased	unbiased	0.9669	0.05822
MZ22504523	AGAP011476	AARA002828	AMIN009018	AALB008507	unbiased	unbiased	Fe_Car_weak	Fe_Car_weak	0.9465	0.07369
MZ22504524	AGAP010411	AARA005898	AMIN004965	AALB007578	not_expressed	Ma_RT_specific	not_expressed	Ma_RT_specific	1.0419	0.12961
MZ22504528	AGAP012013	AARA000801	AMIN004438	AALB010245	unbiased	Fe_RT_weak	Fe_RT_weak	Fe_RT_weak	1.3249	0.14207
MZ22504529	AGAP007048	AARA009365	AMIN011096	AALB005011	not_expressed	not_expressed	Fe_Car_weak	not_expressed	1.6137	0.32216
MZ22504531	AGAP003138	AARA001242	AMIN004641	AALB007276	unbiased	Fe_RT_specific	unbiased	unbiased	0.9767	0.09167
MZ22504534	AGAP005048	AARA003130	AMIN011539	AALB004991	unbiased	unbiased	Fe_RT_weak	Fe_RT_weak	1.1436	0.10205
MZ22504537	AGAP005803	AARA007705	AMIN011145	AALB004464	Ma_Car_weak	unbiased	unbiased	Fe_RT_weak	1.1175	0.13412
MZ22504540	AGAP001391	AARA001842	AMIN000570	AALB002350	Fe_RT_weak	unbiased	unbiased	unbiased	0.9378	0.03842
MZ22504543	AGAP008538	AARA011042	AMIN001016	AALB008025	Ma_Car_weak	unbiased	unbiased	Ma_Car_weak	0.9582	0.06334
MZ22504544	AGAP009307	AARA000289	AMIN001744	AALB001936	Fe_RT_strong	Fe_RT_weak	Fe_RT_weak	Fe_RT_strong	0.9677	0.0538
MZ22504545	AGAP013287	AARA010518	AMIN005282	AALB003318	Fe_RT_weak	unbiased	unbiased	Fe_RT_strong	1.2441	0.15066
MZ22504546	AGAP005742	AARA005677	AMIN011048	AALB005260	Ma_RT_strong	Ma_RT_strong	unbiased	unbiased	0.9312	0.05148
MZ22504547	AGAP004038	AARA009769	AMIN002606	AALB003353	Fe_RT_strong	Fe_RT_specific	Fe_RT_specific	Fe_RT_specific	1.0837	0.1186
MZ22504551	AGAP009166	AARA008707	AMIN009713	AALB000355	unbiased	unbiased	unbiased	unbiased	1.0404	0.09713
MZ22504553	AGAP000560	AARA010486	AMIN005335	AALB006787	unbiased	unbiased	unbiased	unbiased	0.9268	0.03888
MZ22504556	AGAP011285	AARA006282	AMIN009205	AALB007427	Fe_RT_weak	Fe_RT_weak	Fe_RT_weak	Fe_RT_weak	1.1721	0.12509
MZ22504565	AGAP002004	AARA006943	AMIN003311	AALB007146	Fe_RT_weak	Fe_RT_weak	Fe_RT_weak	unbiased	1.2262	0.14872
MZ22504568	AGAP004793	AARA006040	AMIN008134	AALB007514	unbiased	unbiased	unbiased	unbiased	0.8793	0.05541
MZ22504570	AGAP004765	AARA006015	AMIN008104	AALB007469	unbiased	unbiased	unbiased	Fe_RT_weak	0.9229	0.0364
MZ22504575	AGAP005249	AARA002925	AMIN011596	AALB005525	Fe_RT_weak	Fe_RT_weak	Fe_Ubi_weak	Fe_RT_weak	1.1374	0.13489
MZ22504580	AGAP000043	AARA001139	AMIN002104	AALB007776	unbiased	unbiased	Fe_RT_strong	Fe_RT_strong	0.8913	0.11315
MZ22504582	AGAP028052	AARA010866	AMIN001371	AALB001105	not_expressed	not_expressed	not_expressed	Fe_RT_strong	0.9594	0.09832
MZ22504588	AGAP001410	AARA001859	AMIN000586	AALB003376	Ma_Car_weak	unbiased	unbiased	Ma_Car_weak	0.8814	0.05447
MZ22504597	AGAP005162	AARA003018	AMIN007324	AALB003188	unbiased	unbiased	unbiased	Ma_Car_weak	0.9217	0.10059
MZ22504598	AGAP007725	AARA008276	AMIN010362	AALB005433	unbiased	unbiased	unbiased	unbiased	1.1018	0.10139
MZ22504600	AGAP004323	AARA011478	AMIN002978	AALB002864	unbiased	unbiased	Fe_RT_weak	Fe_RT_weak	1.1777	0.12793
MZ22504602	AGAP008749	AARA010849	AMIN001386	AALB001088	unbiased	unbiased	unbiased	unbiased	0.8687	0.0258
MZ22504604	AGAP006648	AARA008523	AMIN007751	AALB004501	unbiased	unbiased	unbiased	unbiased	0.8314	0.01036
MZ22504605	AGAP009424	AARA000208	AMIN001814	AALB001661	unbiased	unbiased	unbiased	unbiased	0.8871	0.03942
MZ22504609	AGAP003029	AARA004856	AMIN003734	AALB002409	unbiased	unbiased	Fe_RT_weak	Fe_RT_weak	1.2103	0.17333
MZ22504611	AGAP010751	AARA008954	AMIN009213	AALB007437	unbiased	unbiased	Fe_RT_weak	unbiased	1.3605	0.22628
MZ22504612	AGAP001135	AARA001611	AMIN002331	AALB009320	Fe_RT_strong	Fe_RT_strong	Fe_RT_strong	Fe_RT_strong	0.882	0.04017
MZ22504619	AGAP002988	AARA004810	AMIN000641	AALB002622	Fe_RT_weak	unbiased	unbiased	Fe_RT_weak	0.8207	0.01056
MZ22504622	AGAP005961	AARA007554	AMIN010969	AALB005789	unbiased	unbiased	unbiased	unbiased	0.8535	0.02929
MZ22504626	AGAP004623	AARA011643	AMIN000047	AALB008313	unbiased	unbiased	Fe_RT_weak	Fe_RT_weak	1.0041	0.07213
MZ22504630	AGAP007521	AARA008089	AMIN010407	AALB005167	unbiased	unbiased	unbiased	Fe_RT_weak	1.2031	0.16919
MZ22504631	AGAP009811	AARA003955	AMIN009544	AALB000382	unbiased	Ma_RT_weak	unbiased	unbiased	0.9879	0.07214
MZ22504635	AGAP007080	AARA007739	AMIN011218	AALB005937	unbiased	unbiased	unbiased	Fe_RT_weak	0.9544	0.07142
MZ22504637	AGAP007137	AARA007801	AMIN011279	AALB004104	Ma_Car_weak	unbiased	Ma_Car_weak	Ma_Car_weak	0.9371	0.06897
MZ22504640	AGAP005468	AARA002331	AMIN010801	AALB005212	Ma_RT_specific	Ma_RT_specific	Ma_RT_specific	Ma_RT_specific	1.2326	0.14248
MZ22504645	AGAP006068	AARA007452	AMIN009907	AALB004418	unbiased	unbiased	unbiased	unbiased	0.9416	0.02646
MZ22504646	AGAP003743	AARA010052	AMIN002949	AALB003033	Fe_RT_strong	Fe_RT_strong	unbiased	Fe_RT_strong	1.3339	0.15238
MZ22504647	AGAP006717	AARA008590	AMIN010118	AALB005378	not_expressed	not_expressed	unbiased	unbiased	1.26	0.14903
MZ22504648	AGAP011584	AARA002711	AMIN008854	AALB003867	unbiased	unbiased	unbiased	Fe_RT_strong	0.9588	0.07869
MZ22504651	AGAP009615	AARA011357	AMIN001470	AALB000728	Fe_RT_weak	Fe_Ubi_weak	Fe_RT_strong	Fe_RT_strong	0.9782	0.07467
MZ22504654	AGAP001472	AARA001923	AMIN002371	AALB009257	unbiased	Fe_RT_weak	Fe_RT_weak	unbiased	1.3882	0.15295
MZ22504656	AGAP000309	AARA010643	AMIN001962	AALB006567	unbiased	unbiased	Fe_RT_specific	unbiased	1.122	0.10803
MZ22504657	AGAP005915	AARA007604	AMIN010710	AALB004450	Ma_RT_specific	Ma_RT_specific	Ma_RT_strong	Ma_RT_specific	0.8769	0.04479
MZ22504659	AGAP006945	AARA009270	AMIN007717	AALB004960	unbiased	unbiased	Fe_RT_strong	Fe_RT_weak	1.0669	0.08429
MZ22504665	AGAP007022	AARA009337	AMIN011120	AALB004632	unbiased	unbiased	unbiased	Fe_RT_weak	1.5458	0.19596
MZ22504666	AGAP006481	AARA008362	AMIN007886	AALB005642	not_expressed	not_expressed	not_expressed	not_expressed	1.1801	0.09897
MZ22504667	AGAP011750	AARA000563	AMIN004501	AALB010673	unbiased	Ma_Car_weak	unbiased	Fe_Car_weak	1.0564	0.11606
MZ22504672	AGAP002638	AARA004210	AMIN003927	AALB008368	unbiased	unbiased	unbiased	unbiased	0.8479	0.02057
MZ22504676	AGAP007902	AARA005224	AMIN007098	AALB001374	unbiased	unbiased	unbiased	unbiased	0.8988	0.04954
MZ22504679	AGAP011084	AARA005512	AMIN008509	AALB009893	Fe_RT_weak	Fe_RT_weak	Fe_RT_weak	Fe_RT_weak	1.0253	0.08675
MZ22504681	AGAP010587	AARA000052	AMIN008187	AALB010394	unbiased	unbiased	unbiased	unbiased	0.8481	0.0225
MZ22504682	AGAP009737	AARA004031	AMIN009480	AALB000102	unbiased	unbiased	Fe_Car_weak	unbiased	0.8405	0.01709
MZ22504683	AGAP009774	AARA004002	AMIN009509	AALB000800	unbiased	unbiased	Fe_RT_weak	Fe_RT_weak	1.0006	0.0603
MZ22504689	AGAP013071	AARA004879	AMIN003755	AALB003583	Ma_RT_specific	unbiased	Ma_Ubi_weak	Ma_RT_specific	0.9209	0.05485
MZ22504693	AGAP004341	AARA005300	AMIN004741	AALB003602	Fe_RT_weak	Fe_RT_weak	Fe_RT_weak	Fe_RT_weak	0.948	0.09168
MZ22504696	AGAP000055	AARA001123	AMIN002120	AALB007749	Ma_Ubi_weak	unbiased	unbiased	unbiased	1.2259	0.15636
MZ22504701	AGAP004693	AARA009589	AMIN007496	AALB009744	Fe_RT_specific	Fe_RT_specific	Fe_RT_specific	Fe_RT_specific	1.0443	0.09672
MZ22504703	AGAP010782	AARA008929	AMIN007035	AALB010703	Ma_Car_weak	unbiased	unbiased	unbiased	0.8677	0.02678
MZ22504704	AGAP004112	AARA009692	AMIN003840	AALB007194	Fe_RT_weak	Fe_RT_strong	unbiased	Fe_RT_strong	1.0134	0.11441
MZ22504706	AGAP003735	AARA010061	AMIN002957	AALB003024	unbiased	unbiased	unbiased	Ma_Car_weak	0.8746	0.01448
MZ22504707	AGAP011663	AARA002640	AMIN008792	AALB010304	Ma_RT_weak	Ma_RT_weak	Ma_RT_weak	Ma_RT_weak	1.0738	0.11378
MZ22504709	AGAP006803	AARA009136	AMIN010040	AALB005286	unbiased	unbiased	unbiased	Ma_RT_weak	1.0436	0.07087
MZ22504710	AGAP007169	AARA007822	AMIN010650	AALB005583	Fe_RT_strong	unbiased	unbiased	unbiased	0.9282	0.06146
MZ22504712	AGAP001265	AARA001734	AMIN002216	AALB009434	Ma_Car_specific	unbiased	Ma_Car_weak	Ma_Car_weak	0.9693	0.04597
MZ22504717	AGAP010834	AARA008875	AMIN006977	AALB010523	unbiased	unbiased	Fe_RT_weak	unbiased	0.8881	0.03866
MZ22504721	AGAP005221	AARA002961	AMIN010728	AALB004357	Fe_RT_weak	Fe_RT_weak	Fe_RT_weak	Fe_RT_weak	1.0274	0.11141
MZ22504722	AGAP010039	AARA003739	AMIN006692	AALB000866	unbiased	unbiased	unbiased	unbiased	0.8486	0.02395
MZ22504723	AGAP005438	AARA002356	AMIN011386	AALB006064	Fe_RT_weak	unbiased	Fe_Ubi_weak	Fe_RT_weak	1.2019	0.15313
MZ22504725	AGAP012248	AARA003332	AMIN006921	AALB010186	unbiased	unbiased	Fe_RT_weak	unbiased	0.9141	0.03791
MZ22504728	AGAP004136	AARA009664	AMIN004223	AALB002160	unbiased	unbiased	unbiased	Fe_RT_weak	1.0108	0.10054
MZ22504729	AGAP009138	AARA008679	AMIN009684	AALB001672	unbiased	unbiased	unbiased	Ma_Car_weak	0.9723	0.04535
MZ22504731	AGAP003070	AARA001181	AMIN003774	AALB003935	Ma_Car_weak	unbiased	unbiased	Ma_Car_weak	1.0329	0.10481
MZ22504732	AGAP000861	AARA002550	AMIN002056	AALB006816	unbiased	unbiased	unbiased	unbiased	1.1566	0.12643
MZ22504736	AGAP007499	AARA008067	AMIN010425	AALB005149	unbiased	unbiased	unbiased	unbiased	0.896	0.05129
MZ22504738	AGAP005125	AARA003054	AMIN007287	AALB005881	Fe_RT_strong	Fe_RT_strong	Fe_RT_strong	Fe_RT_strong	0.9034	0.04877
MZ22504750	AGAP001674	AARA002119	AMIN003482	AALB008062	Ma_Car_weak	unbiased	Ma_Car_weak	Ma_Car_weak	0.8723	0.03881
MZ22504754	AGAP006872	AARA009198	AMIN007645	AALB005718	not_expressed	not_expressed	Ma_RT_specific	not_expressed	1.0988	0.11608
MZ22504757	AGAP005258	AARA002915	AMIN011605	AALB004318	Ma_Car_weak	unbiased	unbiased	Ma_Car_weak	1.0403	0.06798
MZ22504758	AGAP004052	AARA009757	AMIN002618	AALB003340	Fe_RT_specific	Fe_RT_specific	unbiased	Fe_RT_specific	1.2047	0.09764
MZ22504761	AGAP001486	AARA001936	AMIN002385	AALB009246	unbiased	unbiased	unbiased	unbiased	0.9143	0.03614
MZ22504763	AGAP011453	AARA002847	AMIN008999	AALB009813	unbiased	unbiased	unbiased	unbiased	1.011	0.10097
MZ22504764	AGAP000252	AARA010589	AMIN005809	AALB004073	unbiased	unbiased	unbiased	unbiased	0.9242	0.04436
MZ22504765	AGAP007676	AARA008232	AMIN010315	AALB005425	not_expressed	not_expressed	Fe_Car_specific	Fe_Car_specific	1.0823	0.11073
MZ22504767	AGAP002340	AARA004532	AMIN000212	AALB009059	unbiased	unbiased	unbiased	Fe_RT_weak	0.8885	0.04588
MZ22504769	AGAP005644	AARA005756	AMIN010187	AALB004121	Ma_Car_weak	Ma_Car_weak	unbiased	Ma_Car_weak	0.9713	0.06906
MZ22504772	AGAP000563	AARA010481	AMIN005332	AALB006827	unbiased	unbiased	unbiased	Fe_RT_weak	1.0088	0.078
MZ22504775	AGAP001315	AARA001779	AMIN002171	AALB009580	unbiased	unbiased	unbiased	unbiased	1.1085	0.19932
MZ22504776	AGAP002036	AARA006909	AMIN003343	AALB008880	unbiased	unbiased	unbiased	unbiased	0.9612	0.074
MZ22504777	AGAP007772	AARA011967	AMIN006354	AALB000245	unbiased	unbiased	unbiased	unbiased	1.1821	0.1704
MZ22504778	AGAP010706	AARA008997	AMIN008656	AALB010271	Ma_Car_specific	unbiased	unbiased	unbiased	0.9874	0.07302
MZ22504783	AGAP003417	AARA001497	AMIN003860	AALB003392	unbiased	unbiased	Fe_RT_weak	Fe_RT_weak	0.9682	0.09986
MZ22504786	AGAP002142	AARA006798	AMIN003123	AALB008845	unbiased	unbiased	unbiased	Fe_RT_weak	0.9992	0.07886
MZ22504787	AGAP009100	AARA008637	AMIN009642	AALB001717	Ma_RT_strong	Ma_RT_weak	Ma_RT_strong	Ma_RT_specific	0.8867	0.04038
MZ22504788	AGAP004548	AARA006462	AMIN004915	AALB002979	Fe_RT_weak	Fe_RT_strong	Fe_RT_weak	Fe_RT_weak	1.1341	0.10293
MZ22504793	AGAP010054	AARA003718	AMIN006675	AALB007970	Fe_RT_strong	Fe_RT_strong	Fe_RT_weak	Fe_RT_strong	0.9372	0.03795
MZ22504796	AGAP002396	AARA004483	AMIN002659	AALB007236	unbiased	unbiased	unbiased	Fe_Car_weak	0.8463	0.01445
MZ22504800	AGAP012519	AARA012092	AMIN000127	AALB002914	Fe_RT_strong	unbiased	unbiased	unbiased	1.1052	0.11833
MZ22504801	AGAP001397	AARA001846	AMIN000574	AALB002354	unbiased	unbiased	unbiased	Ma_RT_weak	1.1612	0.18363
MZ22504805	AGAP011180	AARA005619	AMIN008404	AALB007034	Fe_RT_strong	Fe_RT_strong	unbiased	Fe_RT_weak	1.1199	0.20405
MZ22504809	AGAP009493	AARA011886	AMIN001869	AALB014161	Ma_Car_weak	unbiased	unbiased	unbiased	1.2335	0.12919
MZ22504811	AGAP003315	AARA001398	AMIN002839	AALB003644	unbiased	unbiased	unbiased	Fe_RT_weak	0.9012	0.07071
MZ22504815	AGAP003359	AARA001444	AMIN003052	AALB002587	Ma_RT_specific	Ma_RT_strong	unbiased	unbiased	0.9243	0.11539
MZ22504822	AGAP010881	AARA008828	AMIN009271	AALB006963	Ma_Car_weak	unbiased	Ma_Car_weak	Ma_Car_weak	0.976	0.08031
MZ22504825	AGAP002052	AARA006894	AMIN003360	AALB009626	unbiased	unbiased	unbiased	Ma_Ubi_specific	1.1495	0.09092
MZ22504826	AGAP003339	AARA001424	AMIN002872	AALB008346	Ma_RT_specific	Ma_RT_specific	Ma_RT_specific	Ma_RT_strong	0.9244	0.04467
MZ22504827	AGAP005394	AARA002405	AMIN007424	AALB004815	unbiased	unbiased	unbiased	unbiased	0.9791	0.05901
MZ22504829	AGAP004230	AARA011571	AMIN004121	AALB002094	unbiased	unbiased	unbiased	Ma_Car_weak	0.8684	0.02753
MZ22504833	AGAP009565	AARA011816	AMIN001936	AALB000498	unbiased	unbiased	unbiased	Fe_Car_weak	0.8856	0.0336
MZ22504836	AGAP000099	AARA001072	AMIN005063	AALB006346	unbiased	unbiased	unbiased	unbiased	0.8555	0.01596
MZ22504837	AGAP012273	AARA003356	AMIN006900	AALB010076	unbiased	unbiased	unbiased	Fe_RT_strong	1.2018	0.11063
MZ22504838	AGAP002674	AARA004169	AMIN003632	AALB008675	Ma_RT_specific	unbiased	unbiased	unbiased	0.9016	0.05002
MZ22504842	AGAP007727	AARA008278	AMIN010207	AALB005431	unbiased	unbiased	Fe_RT_weak	Fe_RT_weak	0.875	0.02125
MZ22504843	AGAP010180	AARA007111	AMIN007258	AALB007840	unbiased	unbiased	Fe_RT_weak	unbiased	1.0872	0.09825
MZ22504845	AGAP001043	AARA006506	AMIN005615	AALB006480	unbiased	unbiased	unbiased	unbiased	0.8202	0.00627
MZ22504846	AGAP010670	AARA009035	AMIN005792	AALB006772	Fe_RT_weak	Fe_RT_weak	Fe_RT_weak	Fe_Ubi_strong	1.2072	0.10853
MZ22504848	AGAP003345	AARA001429	AMIN002877	AALB008342	Fe_RT_weak	unbiased	unbiased	unbiased	1.2764	0.14035
MZ22504849	AGAP009601	AARA011345	AMIN009840	AALB000343	unbiased	unbiased	unbiased	Fe_RT_weak	1.1768	0.12774
MZ22504852	AGAP004530	AARA006449	AMIN004901	AALB002990	unbiased	unbiased	unbiased	unbiased	1.0777	0.11535
MZ22504853	AGAP003684	AARA010109	AMIN004690	AALB010872	unbiased	not_expressed	not_expressed	Ma_Car_weak	1.0918	0.08499
MZ22504855	AGAP003901	AARA009893	AMIN000263	AALB008157	Ma_Car_weak	unbiased	Ma_Car_weak	unbiased	1.0268	0.10177
MZ22504859	AGAP009479	AARA011901	AMIN001854	AALB001623	Ma_RT_specific	Ma_Ubi_weak	unbiased	not_expressed	1.3489	0.11995
MZ22504865	AGAP013007	AARA004378	AMIN002497	AALB002537	not_expressed	not_expressed	not_expressed	not_expressed	0.9949	0.0776
MZ22504866	AGAP008875	AARA009420	AMIN001640	AALB001810	unbiased	unbiased	unbiased	Fe_RT_weak	0.8761	0.02734
MZ22504867	AGAP002281	AARA004063	AMIN004561	AALB008600	unbiased	unbiased	unbiased	Fe_RT_weak	1.3694	0.15985
MZ22504873	AGAP011169	AARA005607	AMIN008414	AALB007045	unbiased	unbiased	unbiased	unbiased	0.94	0.09565
MZ22504876	AGAP008801	AARA010800	AMIN007178	AALB008037	unbiased	Fe_RT_weak	unbiased	unbiased	0.9306	0.05248
MZ22504878	AGAP006532	AARA008416	AMIN007837	AALB005235	Fe_RT_weak	Fe_RT_weak	unbiased	unbiased	0.9115	0.03708
MZ22504883	AGAP001341	AARA001800	AMIN000528	AALB002692	Fe_RT_weak	Fe_RT_weak	Fe_RT_weak	Fe_RT_weak	0.8706	0.015
MZ22504884	AGAP006609	AARA008486	AMIN007785	AALB005542	Fe_RT_strong	Fe_RT_specific	Fe_RT_strong	Fe_RT_strong	0.8881	0.04347
MZ22504890	AGAP012219	AARA003304	AMIN006949	AALB009967	unbiased	Fe_RT_weak	unbiased	unbiased	1.075	0.14647
MZ22504900	AGAP001549	AARA001995	AMIN002438	AALB009129	unbiased	unbiased	unbiased	Fe_RT_weak	1.0044	0.07763
MZ22504901	AGAP008232	AARA004903	AMIN006052	AALB000180	Ma_RT_specific	Ma_RT_specific	Ma_RT_specific	Ma_RT_specific	1.1617	0.06887
MZ22504907	AGAP008492	AARA011083	AMIN009829	AALB001778	Fe_RT_weak	Fe_RT_weak	unbiased	unbiased	1.0255	0.11016
MZ22504908	AGAP007341	AARA007959	AMIN010526	AALB004510	Ma_Car_weak	unbiased	unbiased	Ma_Car_weak	1.1089	0.06288
MZ22504910	AGAP002580	AARA004280	AMIN003995	AALB008206	unbiased	unbiased	unbiased	unbiased	0.9568	0.04909
MZ22504912	AGAP002071	AARA006877	AMIN003378	AALB003043	unbiased	Fe_Car_weak	unbiased	Fe_Car_weak	0.8659	0.04156
MZ22504913	AGAP005826	AARA007682	AMIN011168	AALB005745	unbiased	Fe_RT_weak	unbiased	unbiased	1.114	0.12508
MZ22504914	AGAP005575	AARA002240	AMIN010887	AALB004230	unbiased	unbiased	unbiased	unbiased	1.0363	0.08193
MZ22504919	AGAP010784	AARA008927	AMIN007033	AALB010700	unbiased	unbiased	unbiased	unbiased	0.9468	0.07108
MZ22504920	AGAP007784	AARA011981	AMIN006369	AALB008014	Fe_Car_weak	Fe_Car_weak	Fe_Car_weak	Fe_Car_weak	0.8523	0.02568
MZ22504922	AGAP005245	AARA002934	AMIN011587	AALB004332	Fe_RT_strong	Fe_RT_weak	Fe_RT_strong	Fe_RT_strong	1.2544	0.13787
MZ22504928	AGAP002248	AARA006690	AMIN000156	AALB009648	unbiased	Ma_RT_weak	unbiased	unbiased	1.0943	0.11645
MZ22504929	AGAP003206	AARA001301	AMIN000658	AALB009546	unbiased	unbiased	unbiased	Fe_Car_weak	0.8682	0.02372
MZ22504935	AGAP010428	AARA005917	AMIN004985	AALB007589	unbiased	Ma_Car_weak	unbiased	unbiased	0.8719	0.03632
MZ22504938	AGAP004417	AARA005366	AMIN004802	AALB003489	Fe_RT_weak	unbiased	Fe_RT_weak	Fe_RT_weak	0.932	0.07064
MZ22504940	AGAP000779	AARA010268	AMIN005125	AALB007684	unbiased	unbiased	unbiased	unbiased	1.3067	0.13543
MZ22504941	AGAP003623	AARA010172	AMIN002794	AALB002629	unbiased	Fe_Car_weak	unbiased	unbiased	0.8404	0.02783
MZ22504942	AGAP003280	AARA001358	AMIN000362	AALB009496	Fe_RT_weak	Fe_RT_strong	Fe_RT_strong	Fe_RT_weak	1.2992	0.13736
MZ22504944	AGAP011776	AARA000585	AMIN004286	AALB010830	unbiased	unbiased	unbiased	unbiased	1.2545	0.09351
MZ22504945	AGAP000081	AARA001089	AMIN005047	AALB006623	unbiased	unbiased	unbiased	unbiased	0.9373	0.05542
MZ22504951	AGAP008943	AARA009500	AMIN009386	AALB001548	Ma_Car_weak	Ma_Car_weak	Ma_Car_weak	Ma_Car_weak	0.8674	0.03458
MZ22504953	AGAP000149	AARA001018	AMIN005448	AALB007783	unbiased	Fe_RT_weak	Fe_RT_weak	Fe_RT_weak	0.9797	0.04891
MZ22504958	AGAP003479	AARA001554	AMIN000913	AALB003686	Ma_Car_specific	unbiased	unbiased	Ma_Ubi_weak	0.9458	0.07938
MZ22504960	AGAP006474	AARA008355	AMIN007894	AALB004721	unbiased	unbiased	unbiased	unbiased	0.8947	0.01856
MZ22504963	AGAP003853	AARA009943	AMIN004060	AALB003080	unbiased	unbiased	unbiased	unbiased	0.9646	0.06999
MZ22504967	AGAP005447	AARA002353	AMIN011389	AALB006067	unbiased	unbiased	Fe_Ubi_weak	Fe_RT_weak	1.2202	0.16166
MZ22504972	AGAP004817	AARA006060	AMIN008155	AALB004761	Fe_RT_weak	Fe_RT_weak	unbiased	Fe_RT_weak	1.0533	0.12001
MZ22504975	AGAP005176	AARA003001	AMIN007341	AALB003201	Fe_RT_strong	Fe_RT_weak	unbiased	Fe_RT_weak	1.0478	0.10225
MZ22504979	AGAP000773	AARA010261	AMIN005129	AALB007758	unbiased	Fe_RT_specific	Fe_RT_specific	unbiased	1.2019	0.11025
MZ22504982	AGAP010791	AARA008920	AMIN007025	AALB010694	Fe_RT_strong	Fe_RT_strong	Fe_RT_weak	Fe_RT_strong	0.8899	0.04347
MZ22504984	AGAP008896	AARA009448	AMIN001666	AALB001829	unbiased	unbiased	unbiased	Fe_RT_weak	0.8529	0.02173
MZ22504988	AGAP001507	AARA001957	AMIN002403	AALB009228	unbiased	unbiased	unbiased	unbiased	0.9166	0.06337
MZ22504991	AGAP005406	AARA002393	AMIN011353	AALB006049	Fe_RT_weak	unbiased	Fe_RT_weak	Fe_RT_weak	1.2512	0.18912
MZ22504993	AGAP003605	AARA010193	AMIN002775	AALB009268	unbiased	unbiased	unbiased	unbiased	0.8993	0.03724
MZ22504998	AGAP006483	AARA008364	AMIN007884	AALB005640	unbiased	Ma_Car_weak	unbiased	Ma_Car_weak	1.0045	0.06767
MZ22504999	AGAP007128	AARA007791	AMIN011268	AALB004115	Fe_RT_strong	Fe_RT_strong	Fe_Ubi_weak	Fe_RT_strong	0.9501	0.10537
MZ22505001	AGAP001636	AARA002081	AMIN003447	AALB008642	Fe_RT_strong	Fe_RT_strong	Fe_RT_weak	Fe_RT_strong	1.1177	0.0804
MZ22505007	AGAP013263	AARA001198	AMIN003791	AALB002070	not_expressed	not_expressed	unbiased	unbiased	1.061	0.08659
MZ22505009	AGAP012225	AARA003311	AMIN006942	AALB009961	unbiased	unbiased	Ma_RT_specific	Ma_RT_specific	1.1147	0.11062
MZ22505012	AGAP000973	AARA011715	AMIN005108	AALB006308	Fe_RT_weak	unbiased	Fe_Car_weak	Fe_Car_weak	0.937	0.05404
MZ22505013	AGAP008180	AARA004950	AMIN006098	AALB000031	Ma_Car_weak	unbiased	Ma_Car_weak	unbiased	1.0939	0.10651
MZ22505014	AGAP028210	AARA003131	AMIN011538	AALB004972	not_expressed	not_expressed	Ma_RT_specific	unbiased	1.37	0.24954
MZ22505018	AGAP011933	AARA000725	AMIN008609	AALB003761	Fe_RT_weak	Fe_RT_weak	unbiased	Fe_RT_weak	0.9313	0.05379
MZ22505019	AGAP005119	AARA003061	AMIN007282	AALB004199	unbiased	unbiased	unbiased	Fe_RT_weak	1.0604	0.12556
MZ22505021	AGAP002474	AARA004390	AMIN002746	AALB009731	Fe_RT_weak	not_expressed	Fe_RT_weak	unbiased	0.8768	0.02508
MZ22505025	AGAP009560	AARA011823	AMIN001930	AALB000492	Ma_Ubi_weak	unbiased	unbiased	unbiased	0.9682	0.06081
MZ22505026	AGAP002924	AARA004742	AMIN000745	AALB002376	unbiased	Fe_RT_weak	unbiased	unbiased	0.999	0.07301
MZ22505029	AGAP003748	AARA010046	AMIN002944	AALB003038	not_expressed	unbiased	not_expressed	Ma_RT_specific	1.0846	0.0947
MZ22505030	AGAP010767	AARA008941	AMIN007042	AALB010713	unbiased	Fe_RT_strong	unbiased	unbiased	1.0678	0.08067
MZ22505034	AGAP001467	AARA001919	AMIN002151	AALB009602	Fe_RT_weak	Fe_RT_weak	Fe_RT_weak	Fe_RT_weak	1.4638	0.23121
MZ22505035	AGAP002819	AARA004640	AMIN003661	AALB008903	Ma_Car_weak	unbiased	unbiased	Ma_Car_weak	0.8576	0.02594
MZ22505040	AGAP009337	AARA000263	AMIN001767	AALB001956	unbiased	unbiased	Fe_RT_weak	Fe_RT_weak	1.4772	0.19225
MZ22505041	AGAP009596	AARA011340	AMIN009845	AALB000024	Ma_Car_weak	unbiased	Ma_Car_weak	Ma_Car_weak	0.8763	0.04347
MZ22505046	AGAP000185	AARA000979	AMIN005416	AALB007731	Fe_RT_weak	Fe_RT_strong	unbiased	unbiased	1.0307	0.07506
MZ22505047	AGAP004651	AARA010204	AMIN000105	AALB002894	unbiased	unbiased	unbiased	Fe_RT_weak	1.1645	0.12185
MZ22505071	AGAP000218	AARA010549	AMIN005535	AALB006487	Ma_Car_weak	unbiased	unbiased	Ma_Car_weak	0.9836	0.03639
MZ22505072	AGAP011745	AARA000559	AMIN004505	AALB010668	unbiased	Fe_RT_weak	unbiased	unbiased	0.8955	0.0424
MZ22505073	AGAP004437	AARA006359	AMIN004818	AALB008690	Ma_Car_weak	Ma_Car_weak	unbiased	unbiased	0.8427	0.02057
MZ22505074	AGAP000066	AARA001111	AMIN002131	AALB006642	unbiased	unbiased	Fe_Car_weak	unbiased	1.2382	0.05359
MZ22505075	AGAP002416	AARA004460	AMIN002680	AALB002266	Ma_RT_weak	Ma_RT_strong	unbiased	Ma_RT_weak	1.1061	0.11607
MZ22505080	AGAP009420	AARA000212	AMIN001810	AALB014179	Ma_RT_specific	Ma_RT_specific	not_expressed	not_expressed	1.2502	0.17462
MZ22505081	AGAP010031	AARA003744	AMIN006698	AALB000871	Ma_RT_specific	Ma_RT_specific	Ma_RT_strong	Ma_RT_specific	0.9727	0.02293
MZ22505087	AGAP001249	AARA001725	AMIN002223	AALB009328	not_expressed	not_expressed	not_expressed	Ma_Car_weak	1.0195	0.15283
MZ22505088	AGAP000434	AARA010685	AMIN005582	AALB006794	Fe_RT_weak	Fe_RT_weak	Fe_Ubi_weak	Fe_RT_weak	0.8606	0.01322
MZ22505089	AGAP002441	AARA004431	AMIN002707	AALB002948	not_expressed	unbiased	Ma_Car_specific	not_expressed	1.0252	0.0635
MZ22505090	AGAP003012	AARA004839	AMIN003719	AALB009122	not_expressed	not_expressed	Fe_RT_specific	unbiased	0.8263	0.01082
MZ22505091	AGAP002290	AARA004074	AMIN004569	AALB008607	Fe_RT_weak	unbiased	Fe_RT_weak	unbiased	1.0454	0.08135
MZ22505094	AGAP001763	AARA002214	AMIN003186	AALB003924	unbiased	unbiased	unbiased	Ma_Car_weak	0.8929	0.04267
MZ22505096	AGAP001345	AARA001805	AMIN000535	AALB002687	not_expressed	not_expressed	not_expressed	not_expressed	0.8977	0.05271
MZ22505099	AGAP005057	AARA003123	AMIN011548	AALB006086	unbiased	unbiased	unbiased	unbiased	1.4416	0.13406
MZ22505101	AGAP004494	AARA006416	AMIN004869	AALB002132	unbiased	Fe_Ubi_weak	unbiased	unbiased	1.2203	0.12258
MZ22505102	AGAP000770	AARA010258	AMIN005131	AALB006795	unbiased	unbiased	unbiased	unbiased	0.8553	0.0166
MZ22505103	AGAP000214	AARA010544	AMIN005539	AALB006586	Ma_Car_weak	unbiased	Ma_Car_weak	Ma_Car_weak	0.9369	0.06039
MZ22505104	AGAP000555	AARA010491	AMIN005308	AALB004385	unbiased	unbiased	Fe_Car_weak	Fe_Car_weak	1.0963	0.08544
MZ22505106	AGAP010265	AARA007192	AMIN001126	AALB001278	Fe_RT_weak	Fe_RT_specific	Fe_RT_weak	Fe_RT_weak	1.035	0.11973
MZ22505108	AGAP004584	AARA001164	AMIN004946	AALB003536	unbiased	Ma_RT_weak	unbiased	unbiased	0.8725	0.0256
MZ22505109	AGAP008176	AARA004954	AMIN006101	AALB000033	Ma_RT_specific	Ma_RT_specific	Ma_RT_specific	Fe_Car_strong	0.9618	0.08539
MZ22505111	AGAP009464	AARA011909	AMIN001845	AALB001633	unbiased	unbiased	unbiased	unbiased	0.8907	0.04504
MZ22505120	AGAP000386	AARA010729	AMIN005658	AALB006539	Fe_RT_weak	unbiased	unbiased	Fe_RT_strong	0.8791	0.03708
MZ22505121	AGAP007622	AARA008184	AMIN010262	AALB005403	unbiased	not_expressed	not_expressed	unbiased	1.0448	0.10605
MZ22505122	AGAP004186	AARA009610	AMIN004170	AALB009454	Ma_Car_specific	unbiased	Ma_Car_weak	Ma_Car_weak	0.9762	0.05803
MZ22505123	AGAP010691	AARA009014	AMIN008672	AALB007021	Fe_Car_weak	Fe_Car_weak	Fe_Car_weak	Fe_Ubi_weak	0.8929	0.03653
MZ22505124	AGAP005287	AARA011453	AMIN010764	AALB004391	unbiased	unbiased	unbiased	unbiased	1.055	0.09515
MZ22505125	AGAP007478	AARA008053	AMIN010439	AALB005134	unbiased	unbiased	unbiased	Fe_RT_weak	1.1902	0.15184
MZ22505127	AGAP000998	AARA011737	AMIN005400	AALB006690	unbiased	Ma_RT_weak	unbiased	unbiased	1.1402	0.10865
MZ22505133	AGAP006823	AARA009163	AMIN007619	AALB005308	Fe_RT_specific	Fe_RT_specific	Fe_RT_specific	Fe_RT_specific	1.1332	0.12123
MZ22505134	AGAP012523	AARA002498	AMIN006443	AALB003891	unbiased	unbiased	Fe_RT_weak	unbiased	0.9817	0.04494
MZ22505143	AGAP001657	AARA002101	AMIN003467	AALB008743	not_expressed	not_expressed	unbiased	not_expressed	0.8985	0.0442
MZ22505146	AGAP001302	AARA001767	AMIN002182	AALB009188	unbiased	unbiased	unbiased	unbiased	0.8984	0.06596
MZ22505147	AGAP007023	AARA009339	AMIN011119	AALB004631	unbiased	unbiased	unbiased	Fe_Car_weak	1.0167	0.08151
MZ22505148	AGAP005115	AARA003065	AMIN007278	AALB004195	Fe_RT_weak	unbiased	Fe_RT_weak	Fe_RT_weak	1.3854	0.19462
MZ22505154	AGAP008928	AARA009485	AMIN005888	AALB001948	Ma_Ubi_specific	Ma_RT_weak	Ma_Ubi_weak	Fe_RT_strong	0.8228	0.01598
MZ22505157	AGAP002054	AARA006892	AMIN003363	AALB009623	unbiased	unbiased	unbiased	unbiased	0.8679	0.02601
MZ22505158	AGAP007396	AARA008010	AMIN010479	AALB005986	unbiased	unbiased	unbiased	unbiased	0.9815	0.10292
MZ22505160	AGAP010383	AARA005869	AMIN006577	AALB001222	unbiased	unbiased	Fe_Car_weak	Fe_Car_strong	0.8945	0.04396
MZ22505161	AGAP004358	AARA005313	AMIN000002	AALB008461	unbiased	unbiased	unbiased	unbiased	0.905	0.04541
MZ22505168	AGAP006358	AARA000867	AMIN008006	AALB005869	Fe_RT_weak	unbiased	unbiased	Fe_Ubi_weak	1.1001	0.12106
MZ22505171	AGAP008321	AARA011245	AMIN005981	AALB000277	Ma_Ubi_weak	Ma_Car_weak	unbiased	unbiased	0.8943	0.06777
MZ22505173	AGAP011661	AARA002641	AMIN008793	AALB010303	Fe_RT_weak	Fe_RT_weak	unbiased	Fe_RT_weak	0.9781	0.05069
MZ22505175	AGAP004725	AARA005830	AMIN007461	AALB007489	Fe_RT_weak	Fe_RT_weak	Fe_RT_weak	unbiased	0.8751	0.02463
MZ22505179	AGAP007958	AARA005168	AMIN006310	AALB000845	unbiased	Ma_RT_strong	unbiased	unbiased	0.9322	0.05763
MZ22505183	AGAP011899	AARA000696	AMIN008581	AALB014369	not_expressed	unbiased	unbiased	Fe_RT_weak	0.9546	0.04836
MZ22505184	AGAP000203	AARA010536	AMIN002030	AALB006872	Fe_RT_weak	Fe_RT_strong	Fe_RT_weak	unbiased	1.191	0.16733
MZ22505185	AGAP001224	AARA001697	AMIN002251	AALB009354	Fe_RT_weak	Fe_RT_weak	Fe_RT_weak	Fe_RT_weak	0.8281	0.00962
MZ22505186	AGAP007749	AARA011949	AMIN006334	AALB001974	unbiased	unbiased	unbiased	unbiased	0.9133	0.04484
MZ22505188	AGAP006228	AARA007308	AMIN011341	AALB004675	Ma_RT_strong	Ma_RT_strong	unbiased	Ma_RT_weak	1.0016	0.0853
MZ22505191	AGAP010808	AARA008904	AMIN007011	AALB010444	unbiased	Fe_RT_specific	unbiased	unbiased	1.0491	0.09658
MZ22505192	AGAP004888	AARA006076	AMIN008174	AALB004746	Ma_RT_specific	Ma_RT_specific	Ma_RT_specific	Ma_RT_specific	0.9914	0.0501
MZ22505196	AGAP000637	AARA010416	AMIN005720	AALB006941	unbiased	not_expressed	Ma_Car_weak	Ma_Car_weak	0.8671	0.01908
MZ22505198	AGAP006949	AARA009274	AMIN007720	AALB005731	unbiased	unbiased	unbiased	unbiased	0.8761	0.0411
MZ22505199	AGAP004147	AARA009650	AMIN004209	AALB008456	unbiased	unbiased	Fe_RT_weak	not_expressed	0.8375	0.0118
MZ22505203	AGAP006960	AARA009285	AMIN001578	AALB005738	Ma_RT_weak	Ma_RT_weak	unbiased	unbiased	0.9426	0.07453
MZ22505205	AGAP009772	AARA004004	AMIN009507	AALB000798	unbiased	Fe_Car_weak	unbiased	unbiased	0.9314	0.05254
MZ22505206	AGAP000987	AARA011729	AMIN005465	AALB006934	unbiased	unbiased	unbiased	unbiased	0.9575	0.05587
MZ22505209	AGAP001923	AARA007012	AMIN000483	AALB008806	unbiased	unbiased	unbiased	unbiased	1.1135	0.16628
MZ22505217	AGAP003285	AARA001366	AMIN000355	AALB009490	not_expressed	unbiased	unbiased	unbiased	0.9247	0.04996
MZ22505218	AGAP006678	AARA008553	AMIN010146	AALB005352	unbiased	unbiased	unbiased	unbiased	1.2267	0.17359
MZ22505219	AGAP001897	AARA007032	AMIN000462	AALB008824	Fe_RT_strong	Fe_RT_weak	Fe_RT_strong	Fe_RT_weak	1.2986	0.13912
MZ22505221	AGAP004683	AARA011432	AMIN006469	AALB007531	unbiased	unbiased	Fe_RT_weak	unbiased	1.1919	0.07741
MZ22505226	AGAP000446	AARA010675	AMIN005592	AALB006573	unbiased	unbiased	unbiased	unbiased	1.0312	0.06948
MZ22505227	AGAP009236	AARA008768	AMIN009764	AALB000145	unbiased	Fe_RT_weak	unbiased	unbiased	0.8539	0.01871
MZ22505228	AGAP001215	AARA001691	AMIN002255	AALB009360	Fe_RT_weak	Fe_RT_weak	Fe_RT_weak	unbiased	1.0251	0.09531
MZ22505230	AGAP003753	AARA010042	AMIN002940	AALB002480	Ma_Car_weak	unbiased	unbiased	Ma_RT_strong	1.0094	0.04856
MZ22505232	AGAP006569	AARA008446	AMIN007816	AALB005250	unbiased	Ma_Car_weak	Ma_Car_weak	Ma_Car_weak	0.8498	0.01485
MZ22505234	AGAP008712	AARA010889	AMIN001352	AALB000219	Ma_RT_specific	unbiased	Ma_Car_specific	unbiased	0.9231	0.05145
MZ22505236	AGAP005578	AARA002238	AMIN010890	AALB004924	Fe_RT_weak	Fe_RT_weak	unbiased	Fe_RT_weak	1.1346	0.09322
MZ22505237	AGAP007384	AARA007998	AMIN010489	AALB005753	unbiased	unbiased	unbiased	unbiased	0.9956	0.06487
MZ22505240	AGAP005345	AARA002446	AMIN007388	AALB005911	unbiased	unbiased	Ma_Car_weak	Ma_Car_weak	0.9911	0.08005
MZ22505242	AGAP002463	AARA004404	AMIN002734	AALB009721	Ma_RT_strong	Ma_RT_strong	Ma_RT_strong	unbiased	0.9928	0.08941
MZ22505244	AGAP003220	AARA001314	AMIN000669	AALB009537	unbiased	Ma_RT_specific	unbiased	unbiased	1.0235	0.08472
MZ22505248	AGAP012353	AARA003428	AMIN009347	AALB009980	Fe_RT_weak	Fe_RT_specific	unbiased	Fe_Car_weak	0.986	0.03836
MZ22505251	AGAP005584	AARA005808	AMIN010896	AALB004919	unbiased	unbiased	unbiased	unbiased	0.8749	0.03561
MZ22505252	AGAP002250	AARA006688	AMIN000154	AALB002662	unbiased	unbiased	unbiased	unbiased	1.0676	0.16927
MZ22505254	AGAP004087	AARA009724	AMIN004666	AALB008539	unbiased	unbiased	unbiased	unbiased	0.8949	0.06433
MZ22505259	AGAP006534	AARA008418	AMIN007836	AALB005236	Fe_RT_weak	Fe_RT_strong	Fe_RT_weak	Fe_RT_weak	1.2946	0.12585
MZ22505261	AGAP005139	AARA003039	AMIN007303	AALB005894	Fe_RT_specific	unbiased	Fe_RT_weak	unbiased	0.9517	0.05061
MZ22505263	AGAP008832	AARA009374	AMIN001583	AALB001528	Fe_RT_weak	Fe_RT_weak	unbiased	Fe_RT_weak	1.2837	0.15959
MZ22505265	AGAP005200	AARA002984	AMIN007358	AALB003213	unbiased	unbiased	unbiased	unbiased	0.9335	0.03544
MZ22505268	AGAP001091	AARA000468	AMIN005767	AALB006728	Fe_RT_weak	unbiased	unbiased	Fe_RT_weak	0.9271	0.02758
MZ22505271	AGAP003926	AARA009858	AMIN000284	AALB008759	unbiased	unbiased	Fe_Car_strong	Fe_Car_strong	1.2231	0.18965
MZ22505272	AGAP003323	AARA001408	AMIN002851	AALB003655	unbiased	unbiased	unbiased	Ma_Car_weak	0.9307	0.0512
MZ22505274	AGAP008794	AARA010808	AMIN001431	AALB000654	unbiased	unbiased	unbiased	Fe_RT_weak	1.3065	0.23477
MZ22505277	AGAP001337	AARA001798	AMIN000526	AALB002694	Ma_RT_specific	Ma_RT_specific	Fe_RT_strong	unbiased	0.946	0.0567
MZ22505279	AGAP006249	AARA007290	AMIN008082	AALB003236	unbiased	unbiased	unbiased	unbiased	0.8533	0.02211
MZ22505280	AGAP002625	AARA004227	AMIN003943	AALB008385	unbiased	unbiased	Fe_RT_weak	Fe_Car_strong	1.0282	0.07974
MZ22505283	AGAP010204	AARA007135	AMIN001186	AALB007849	unbiased	unbiased	unbiased	unbiased	0.9345	0.06909
MZ22505285	AGAP007511	AARA008080	AMIN010414	AALB005160	Fe_RT_weak	unbiased	Fe_RT_weak	Fe_RT_strong	0.9813	0.0756
MZ22505289	AGAP008016	AARA005108	AMIN006251	AALB000696	unbiased	unbiased	unbiased	Fe_RT_weak	0.866	0.03376
MZ22505294	AGAP004099	AARA009708	AMIN003825	AALB002333	unbiased	Fe_Car_weak	unbiased	Fe_Ubi_weak	0.9771	0.08649
MZ22505296	AGAP002815	AARA004637	AMIN003657	AALB008900	not_expressed	not_expressed	not_expressed	not_expressed	0.873	0.02922
[truncated: 5,401 more rows]

## Sheet: Legend
Column names	Explanation
OrthoGroup	Orthogroup identifier
AgamOrthos	Ortholog in An. gambiae
AaraOrthos	Ortholog in An. arabiensis
AminOrthos	Ortholog in An. minimus
AalbOrthos	Ortholog in An. albimanus
Gam_final.class.corr	Sex-biased classification of An. gambiae ortholog
Ara_final.class.corr	Sex-biased classification of An. arabiensis ortholog
Min_final.class.corr	Sex-biased classification of An. minimus ortholog
Alb_final.class.corr	Sex-biased classification of An. albimanus ortholog
evorate	Evolutionary Rate value used to estimate sequence divergence at the protein level
AnodNdS	dN/dS calculated for the entire Anopheles tree used to estimate sequence divergence at the DNA level
