# Supplementary material for: Rapid evolution of female-biased genes among four species of Anopheles malaria mosquitoes
Source: HighWire-hosted journal article supplement (doi:10.1101/gr.217216.116), 2017-07-26
Supplement: Supplemental_Table_S3.xlsx [file Supplemental_Table_S3.xlsx]

## Sheet: CvsRT_F
OrthoGroup	gam_spliced	ara_spliced	min_spliced	alb_spliced	num_spliced
MZ22500010	NA	AARA006929	NA	NA	1
MZ22500079	NA	AARA006363	NA	NA	1
MZ22500101	NA	AARA008848	NA	NA	1
MZ22500126	NA	AARA011194	NA	NA	1
MZ22500152	NA	NA	AMIN007893	NA	1
MZ22500182	AGAP010686	NA	NA	NA	1
MZ22500188	NA	NA	NA	AALB002958	1
MZ22500243	NA	NA	NA	AALB006181	1
MZ22500275	NA	NA	AMIN008422	NA	1
MZ22500292	NA	AARA008809	AMIN009287	AALB004006	3
MZ22500306	NA	NA	AMIN010342	NA	1
MZ22500325	NA	NA	NA	AALB007239	1
MZ22500344	NA	AARA000869	NA	NA	1
MZ22500348	NA	NA	AMIN000167	NA	1
MZ22500357	AGAP013386	NA	NA	NA	1
MZ22500430	NA	NA	AMIN007013	NA	1
MZ22500450	NA	AARA004341	NA	NA	1
MZ22500515	NA	AARA000294	NA	NA	1
MZ22500521	AGAP004039	NA	NA	NA	1
MZ22500552	NA	NA	AMIN000244	NA	1
MZ22500557	NA	NA	NA	AALB005665	1
MZ22500589	NA	AARA009230	NA	NA	1
MZ22500638	NA	AARA012034	NA	NA	1
MZ22500690	AGAP001480	NA	NA	NA	1
MZ22500736	NA	NA	NA	AALB004719	1
MZ22500767	NA	AARA000676	NA	NA	1
MZ22500775	NA	NA	AMIN010404	NA	1
MZ22500806	NA	AARA010790	NA	NA	1
MZ22500820	NA	AARA005246	NA	NA	1
MZ22500822	NA	NA	AMIN006262	NA	1
MZ22500834	NA	AARA006897	NA	NA	1
MZ22500840	NA	NA	AMIN002364	NA	1
MZ22500885	NA	NA	AMIN011180	NA	1
MZ22500890	NA	AARA005291	NA	NA	1
MZ22500957	NA	NA	AMIN008141	NA	1
MZ22500978	NA	NA	AMIN006139	NA	1
MZ22501066	NA	NA	NA	AALB005927	1
MZ22501074	NA	NA	AMIN007752	NA	1
MZ22501201	NA	NA	AMIN008379	NA	1
MZ22501224	NA	NA	NA	AALB008810	1
MZ22501276	NA	NA	NA	AALB008297	1
MZ22501295	NA	NA	NA	AALB009127	1
MZ22501352	NA	AARA001195	NA	NA	1
MZ22501365	NA	AARA001830	NA	NA	1
MZ22501445	NA	AARA000229	NA	NA	1
MZ22501500	NA	NA	AMIN007572	NA	1
MZ22501559	NA	NA	AMIN011625	NA	1
MZ22501614	NA	NA	AMIN009737	NA	1
MZ22501698	NA	NA	NA	AALB004596	1
MZ22501704	NA	AARA007406	NA	NA	1
MZ22501728	NA	AARA010085	NA	NA	1
MZ22501748	NA	AARA005182	NA	NA	1
MZ22501809	NA	AARA000875	NA	NA	1
MZ22501838	NA	NA	NA	AALB008826	1
MZ22501861	NA	NA	NA	AALB001189	1
MZ22501873	AGAP007512	NA	NA	NA	1
MZ22501889	NA	NA	AMIN009693	NA	1
MZ22501892	NA	NA	AMIN002807	NA	1
MZ22501918	NA	NA	AMIN002164	NA	1
MZ22501940	NA	AARA001922	NA	NA	1
MZ22501977	NA	NA	NA	AALB006336	1
MZ22501986	NA	NA	NA	AALB001313	1
MZ22501992	NA	AARA009991	NA	NA	1
MZ22502156	NA	NA	AMIN003619	AALB008664	2
MZ22502194	NA	NA	NA	AALB001785	1
MZ22502218	NA	NA	AMIN007232	NA	1
MZ22502270	NA	NA	AMIN010176	NA	1
MZ22502276	AGAP007636	NA	NA	NA	1
MZ22502328	NA	NA	AMIN000495	NA	1
MZ22502340	NA	NA	NA	AALB008683	1
MZ22502344	NA	NA	AMIN004044	NA	1
MZ22502365	NA	NA	NA	AALB001575	1
MZ22502366	NA	NA	NA	AALB007106	1
MZ22502375	NA	AARA004988	NA	NA	1
MZ22502404	NA	NA	AMIN006879	NA	1
MZ22502478	NA	NA	AMIN000295	NA	1
MZ22502517	NA	NA	AMIN007945	NA	1
MZ22502528	NA	AARA010453	NA	NA	1
MZ22502535	NA	NA	NA	AALB004965	1
MZ22502564	NA	NA	NA	AALB004166	1
MZ22502573	AGAP010638	NA	NA	NA	1
MZ22502650	NA	NA	AMIN002701	NA	1
MZ22502661	NA	NA	NA	AALB005448	1
MZ22502683	NA	NA	NA	AALB000191	1
MZ22502737	AGAP002858	AARA004673	AMIN003224	NA	3
MZ22502771	NA	NA	AMIN003783	NA	1
MZ22502838	NA	NA	NA	AALB009094	1
MZ22502869	NA	NA	NA	AALB007524	1
MZ22502872	AGAP006186	AARA007335	NA	NA	2
MZ22502933	NA	NA	AMIN005887	NA	1
MZ22502935	NA	AARA004388	NA	NA	1
MZ22502949	NA	AARA007970	NA	NA	1
MZ22502967	NA	AARA005293	NA	NA	1
MZ22502979	NA	NA	AMIN003118	NA	1
MZ22503007	NA	NA	AMIN011173	AALB005990	2
MZ22503037	NA	NA	NA	AALB009253	1
MZ22503107	NA	NA	AMIN004650	NA	1
MZ22503122	NA	AARA006183	NA	NA	1
MZ22503126	NA	AARA004465	NA	NA	1
MZ22503164	NA	NA	NA	AALB008865	1
MZ22503169	NA	NA	AMIN005454	NA	1
MZ22503203	NA	NA	AMIN003604	NA	1
MZ22503226	NA	NA	NA	AALB010063	1
MZ22503281	NA	NA	NA	AALB010340	1
MZ22503321	NA	AARA006550	NA	NA	1
MZ22503370	NA	NA	NA	AALB002745	1
MZ22503376	NA	AARA011884	AMIN001870	NA	2
MZ22503378	NA	NA	AMIN011559	NA	1
MZ22503384	NA	NA	NA	AALB005434	1
MZ22503388	NA	NA	AMIN004695	AALB010877	2
MZ22503454	NA	AARA008871	NA	NA	1
MZ22503459	NA	NA	NA	AALB001529	1
MZ22503465	NA	NA	NA	AALB002739	1
MZ22503523	NA	NA	AMIN007794	NA	1
MZ22503531	NA	AARA008712	NA	NA	1
MZ22503628	NA	NA	AMIN008602	NA	1
MZ22503638	NA	NA	NA	AALB009095	1
MZ22503741	NA	NA	AMIN008178	NA	1
MZ22503748	NA	NA	NA	AALB007652	1
MZ22503762	NA	NA	NA	AALB005483	1
MZ22503787	NA	AARA009930	NA	NA	1
MZ22503798	NA	NA	AMIN007891	NA	1
MZ22503896	NA	NA	AMIN002137	NA	1
MZ22503962	NA	AARA003164	NA	NA	1
MZ22503970	NA	NA	AMIN000646	NA	1
MZ22504058	NA	AARA003728	NA	NA	1
MZ22504101	NA	NA	NA	AALB002398	1
MZ22504147	NA	NA	AMIN000765	AALB008121	2
MZ22504148	NA	AARA011072	NA	NA	1
MZ22504174	NA	NA	NA	AALB006248	1
MZ22504183	NA	NA	AMIN001620	NA	1
MZ22504215	NA	AARA002970	NA	NA	1
MZ22504221	NA	AARA005660	AMIN011063	NA	2
MZ22504241	NA	NA	AMIN003420	NA	1
MZ22504258	NA	AARA007072	NA	NA	1
MZ22504267	NA	AARA003426	NA	NA	1
MZ22504274	NA	NA	AMIN002878	NA	1
MZ22504283	NA	NA	AMIN003581	NA	1
MZ22504327	NA	NA	AMIN004229	NA	1
MZ22504337	NA	NA	NA	AALB000310	1
MZ22504386	NA	NA	AMIN001727	AALB001458	2
MZ22504401	NA	NA	AMIN001726	NA	1
MZ22504409	NA	NA	AMIN003904	NA	1
MZ22504415	NA	NA	AMIN008366	NA	1
MZ22504479	NA	AARA000836	NA	NA	1
MZ22504530	NA	NA	AMIN002772	NA	1
MZ22504537	NA	NA	AMIN011145	NA	1
MZ22504622	NA	AARA007554	NA	NA	1
MZ22504648	NA	NA	AMIN008854	AALB003867	2
MZ22504728	NA	NA	NA	AALB002160	1
MZ22504775	NA	NA	AMIN002171	AALB009580	2
MZ22504815	NA	NA	AMIN003052	NA	1
MZ22504839	NA	NA	AMIN005890	NA	1
MZ22504845	NA	NA	NA	AALB006480	1
MZ22504884	NA	NA	NA	AALB005542	1
MZ22504922	NA	AARA002934	AMIN011587	NA	2
MZ22504929	NA	NA	AMIN000658	NA	1
MZ22504941	NA	NA	AMIN002794	AALB002629	2
MZ22505001	NA	NA	AMIN003447	NA	1
MZ22505013	NA	NA	NA	AALB000031	1
MZ22505099	NA	NA	NA	AALB006086	1
MZ22505158	NA	NA	AMIN010479	NA	1
MZ22505175	AGAP004725	NA	NA	NA	1
MZ22505343	NA	NA	AMIN000749	NA	1
MZ22505360	NA	NA	AMIN010294	AALB005436	2
MZ22505376	NA	NA	NA	AALB000828	1
MZ22505385	NA	AARA003658	AMIN007220	NA	2
MZ22505421	NA	NA	AMIN011001	AALB004133	2
MZ22505482	NA	NA	AMIN003510	NA	1
MZ22505493	NA	NA	AMIN001981	NA	1
MZ22505541	NA	NA	AMIN003868	NA	1
MZ22505562	NA	AARA010993	AMIN009149	NA	2
MZ22505617	NA	AARA002400	NA	NA	1
MZ22505621	NA	NA	AMIN011079	NA	1
MZ22505624	NA	AARA010884	NA	NA	1
MZ22505625	NA	NA	NA	AALB009528	1
MZ22505645	NA	NA	AMIN004958	NA	1
MZ22505675	NA	NA	AMIN010599	AALB005528	2
MZ22505691	NA	NA	AMIN001644	NA	1
MZ22505724	NA	NA	AMIN006115	NA	1
MZ22505762	NA	NA	AMIN008806	NA	1
MZ22505769	NA	NA	NA	AALB001328	1
MZ22505777	NA	NA	AMIN002354	AALB009299	2
MZ22505785	NA	NA	NA	AALB006905	1
MZ22505797	NA	NA	NA	AALB000406	1
MZ22505846	NA	NA	AMIN010952	NA	1
MZ22505873	NA	AARA005763	NA	NA	1
MZ22505891	NA	NA	AMIN003091	AALB008859	2
MZ22505912	NA	AARA004962	NA	NA	1
MZ22506037	NA	NA	AMIN010743	NA	1
MZ22506072	NA	NA	AMIN003217	NA	1
MZ22506121	NA	NA	AMIN002070	NA	1
MZ22506146	NA	NA	AMIN000246	NA	1
MZ22506151	NA	NA	NA	AALB003170	1
MZ22506158	NA	AARA007963	NA	NA	1
MZ22506190	NA	NA	AMIN005468	NA	1
MZ22506196	NA	NA	AMIN008926	NA	1
MZ22506272	NA	NA	AMIN005214	NA	1
MZ22506438	NA	AARA007575	AMIN010985	NA	2
MZ22506530	AGAP010303	NA	NA	NA	1
MZ22506585	NA	AARA005762	NA	NA	1
MZ22506605	NA	NA	AMIN001461	NA	1
MZ22506719	NA	NA	NA	AALB003596	1
MZ22506728	NA	NA	AMIN005683	NA	1
MZ22506733	NA	NA	AMIN006767	NA	1
MZ22506758	NA	AARA003867	NA	NA	1
MZ22506832	NA	NA	AMIN002798	NA	1
MZ22506833	NA	NA	NA	AALB007010	1
MZ22506856	NA	NA	AMIN004100	NA	1
MZ22506986	NA	NA	NA	AALB010132	1
MZ22507091	NA	AARA006746	NA	NA	1
MZ22507100	NA	NA	NA	AALB010529	1
MZ22507115	NA	NA	AMIN010402	NA	1
MZ22507218	NA	NA	NA	AALB001330	1
MZ22507221	NA	AARA005936	NA	NA	1
MZ22507227	NA	NA	AMIN003446	NA	1
MZ22507282	NA	NA	AMIN003068	AALB008279	2
MZ22507285	NA	NA	AMIN007336	NA	1
MZ22507349	NA	AARA008813	NA	NA	1
MZ22507372	NA	AARA008966	NA	NA	1
MZ22507385	NA	NA	NA	AALB007237	1
MZ22507408	NA	NA	NA	AALB004795	1
MZ22507475	NA	NA	AMIN005533	NA	1
MZ22507495	AGAP008706	NA	NA	NA	1
MZ22507566	NA	NA	AMIN008199	NA	1
MZ22507728	NA	NA	AMIN000191	NA	1
MZ22507729	NA	NA	AMIN006268	NA	1
MZ22507799	NA	NA	NA	AALB009751	1
MZ22507855	NA	AARA005663	AMIN011061	NA	2
MZ22507894	NA	AARA009237	NA	NA	1
MZ22507953	NA	NA	NA	AALB005666	1
MZ22507970	NA	NA	AMIN005771	NA	1
MZ22508080	NA	NA	NA	AALB002240	1
MZ22508179	NA	AARA005436	NA	NA	1
MZ22508258	NA	NA	AMIN008872	NA	1
MZ22508271	NA	NA	NA	AALB010180	1
MZ22508580	NA	NA	AMIN001622	NA	1
MZ22508590	NA	AARA004871	NA	NA	1
MZ22508600	NA	NA	NA	AALB001964	1
MZ22508615	NA	AARA000850	AMIN008021	NA	2
MZ22508660	NA	NA	AMIN007159	NA	1
MZ22508666	NA	NA	AMIN009282	NA	1
MZ22508672	NA	NA	AMIN000525	NA	1
MZ22508746	NA	AARA007413	NA	NA	1
MZ22508771	NA	NA	AMIN001686	NA	1
MZ22508792	NA	NA	AMIN009175	NA	1
MZ22508812	NA	NA	AMIN011078	NA	1
MZ22508832	NA	AARA000795	NA	NA	1
MZ22508835	NA	NA	AMIN006840	AALB001138	2
MZ22508903	NA	NA	AMIN005886	NA	1
MZ22508914	NA	NA	NA	AALB005668	1
MZ22508948	NA	AARA005006	NA	NA	1
MZ22508956	NA	NA	AMIN006127	NA	1
MZ22509012	NA	AARA003056	AMIN007286	AALB005880	3
MZ22509033	NA	AARA008912	NA	NA	1
MZ22509051	NA	NA	AMIN007503	NA	1
MZ22509077	NA	NA	NA	AALB005041	1
MZ22509079	NA	AARA007482	AMIN007531	NA	2
MZ22509130	NA	NA	AMIN006574	NA	1
MZ22509138	NA	NA	AMIN008271	NA	1
MZ22509153	NA	NA	AMIN007738	NA	1
MZ22509177	NA	NA	NA	AALB000032	1
MZ22509274	NA	NA	NA	AALB009108	1
MZ22509282	NA	NA	AMIN002092	NA	1
MZ22509324	NA	NA	NA	AALB006364	1
MZ22509423	NA	NA	AMIN002482	NA	1
MZ22509473	NA	AARA001899	AMIN003261	AALB002681	3
MZ22509514	NA	NA	AMIN010838	NA	1
MZ22509515	NA	NA	AMIN002202	AALB009206	2
MZ22509706	AGAP011766	NA	NA	NA	1
MZ22509743	AGAP009546	AARA011832	NA	NA	2
MZ22509749	NA	AARA008811	NA	NA	1
MZ22509846	NA	AARA004782	NA	NA	1
MZ22509864	NA	NA	NA	AALB009713	1
MZ22509948	NA	NA	AMIN003436	AALB008654	2
MZ22510049	NA	AARA005711	NA	NA	1
MZ22510071	NA	NA	NA	AALB000379	1
MZ22510123	NA	NA	NA	AALB007920	1
MZ22510169	AGAP009693	NA	AMIN001546	NA	2
MZ22510208	NA	AARA011407	NA	NA	1
MZ22510231	NA	NA	AMIN000539	NA	1
MZ22510243	NA	NA	AMIN001642	NA	1
MZ22510268	NA	NA	AMIN004876	AALB003564	2
MZ22510271	NA	NA	AMIN001297	NA	1
MZ22510398	NA	AARA000675	NA	NA	1
MZ22510417	NA	NA	NA	AALB001446	1
MZ22510451	NA	AARA008197	AMIN010275	AALB006242	3
MZ22510453	NA	NA	AMIN001919	NA	1
MZ22510457	NA	AARA001831	NA	NA	1
MZ22510534	NA	NA	NA	AALB004335	1
MZ22510560	AGAP008413	NA	NA	NA	1
MZ22510632	NA	NA	NA	AALB004286	1
MZ22510743	NA	AARA002404	NA	NA	1
MZ22510751	AGAP005609	NA	NA	NA	1
MZ22510786	AGAP000207	NA	NA	NA	1
MZ22510794	NA	NA	AMIN011554	NA	1
MZ22510816	NA	NA	AMIN005167	NA	1
MZ22510827	NA	NA	AMIN007197	NA	1
MZ22510879	NA	AARA011135	NA	NA	1
MZ22510916	NA	AARA002307	NA	NA	1
MZ22510917	NA	AARA007706	AMIN011144	NA	2
MZ22510973	NA	AARA000190	AMIN001833	NA	2
MZ22510991	NA	NA	AMIN002411	AALB009156	2
MZ22511183	NA	NA	NA	AALB001318	1
MZ22511203	NA	NA	AMIN000752	NA	1
MZ22511406	NA	AARA011881	NA	NA	1
MZ22511655	NA	NA	AMIN010944	NA	1
MZ22511678	AGAP003398	NA	NA	NA	1
MZ22511762	AGAP005079	NA	AMIN007596	NA	2
MZ22511950	AGAP004405	NA	NA	NA	1
MZ22511969	NA	NA	AMIN003199	AALB003052	2
MZ22512033	NA	AARA011727	NA	NA	1
MZ22512204	NA	NA	AMIN000735	NA	1
MZ22512284	NA	NA	AMIN000225	NA	1
MZ22512367	NA	NA	AMIN011169	NA	1
MZ22512408	NA	NA	AMIN008378	NA	1
MZ22512423	NA	NA	AMIN000905	NA	1
MZ22512462	NA	NA	AMIN000644	NA	1
MZ22512473	NA	AARA010838	NA	NA	1
MZ22512498	NA	NA	NA	AALB004623	1
MZ22512555	AGAP003997	NA	NA	NA	1
MZ22512626	NA	AARA000665	NA	NA	1
MZ22512627	AGAP002192	NA	NA	NA	1
MZ22512714	NA	NA	AMIN010784	NA	1
MZ22512743	NA	NA	AMIN004076	NA	1
MZ22512863	NA	NA	AMIN006265	NA	1
MZ22512943	NA	NA	AMIN003522	NA	1
MZ22512944	NA	AARA009158	AMIN011556	NA	2
MZ22513034	NA	AARA005941	NA	NA	1
MZ22513067	NA	NA	AMIN005324	NA	1
MZ22513141	NA	NA	AMIN005112	NA	1
MZ22513169	NA	AARA000789	NA	AALB010122	2
MZ22513411	NA	NA	AMIN010173	NA	1
MZ22513566	AGAP005608	NA	NA	NA	1
MZ22513572	NA	NA	AMIN008176	NA	1
MZ22513589	NA	NA	NA	AALB007603	1
MZ22513634	NA	AARA002121	NA	NA	1
MZ22513791	NA	AARA006671	NA	NA	1
MZ22513971	NA	NA	AMIN003049	NA	1
MZ22513985	NA	AARA003825	NA	NA	1
MZ22514053	NA	NA	NA	AALB005044	1
MZ22514111	NA	AARA010299	NA	NA	1
MZ22514321	NA	NA	NA	AALB009066	1
MZ22514479	NA	NA	AMIN008866	NA	1
MZ22514530	NA	NA	AMIN007865	NA	1
MZ22514648	NA	NA	NA	AALB004297	1
MZ22514723	NA	NA	NA	AALB005283	1
MZ22514755	NA	AARA004726	NA	NA	1
MZ22514789	NA	AARA004955	NA	NA	1
MZ22514807	NA	AARA011989	AMIN006376	AALB008020	3
MZ22514838	NA	NA	AMIN004443	NA	1
MZ22514929	NA	NA	AMIN010958	NA	1
MZ22514932	NA	NA	AMIN001704	NA	1
MZ22514971	NA	NA	AMIN002156	NA	1
MZ22515031	NA	NA	AMIN004959	NA	1
MZ22515063	NA	NA	AMIN002554	NA	1
MZ22515075	AGAP002263	NA	NA	NA	1
MZ22515096	NA	NA	AMIN005061	NA	1
MZ22515111	NA	NA	AMIN007740	NA	1
MZ22515191	NA	NA	AMIN005768	NA	1
MZ22515330	NA	AARA011347	AMIN009838	NA	2
MZ22515386	NA	NA	AMIN009851	NA	1
MZ22515620	NA	NA	AMIN006922	NA	1
MZ22515697	NA	NA	AMIN009193	NA	1
MZ22515855	AGAP004677	NA	NA	NA	1
MZ22515904	NA	NA	NA	AALB006481	1
MZ22516028	NA	NA	AMIN000645	AALB002626	2
MZ22516198	AGAP000733	NA	NA	NA	1
MZ22516319	NA	NA	AMIN004114	AALB008560	2
MZ22516347	NA	NA	NA	AALB002702	1
MZ22516399	NA	NA	NA	AALB010758	1
MZ22516424	NA	AARA002401	NA	AALB004811	2
MZ22516523	NA	NA	AMIN005009	NA	1
MZ22516566	NA	NA	NA	AALB003001	1
MZ22516664	NA	NA	AMIN003092	AALB008858	2
MZ22516672	NA	AARA010041	NA	NA	1
MZ22516993	NA	NA	AMIN002481	NA	1
MZ22517068	NA	AARA008616	AMIN009736	AALB000143	3
MZ22517112	NA	AARA011053	AMIN001437	NA	2
MZ22517113	NA	AARA007647	AMIN010001	NA	2
MZ22517225	NA	NA	NA	AALB000363	1
MZ22517249	NA	NA	AMIN000764	AALB008122	2
MZ22517274	NA	NA	AMIN007598	NA	1
MZ22517399	NA	AARA002398	AMIN007432	AALB004807	3
MZ22517455	NA	NA	AMIN001809	NA	1
MZ22517462	NA	AARA002936	AMIN011585	NA	2
MZ22517590	NA	NA	AMIN008486	AALB010755	2
MZ22517597	NA	NA	AMIN007864	NA	1
MZ22517598	NA	NA	AMIN000388	NA	1
MZ22517646	AGAP005056	NA	NA	NA	1
MZ22517715	NA	NA	AMIN010022	NA	1
MZ22517868	NA	NA	AMIN009295	NA	1
MZ22517945	NA	AARA008318	NA	NA	1
MZ22517969	NA	AARA003836	AMIN006796	NA	2
MZ22517983	NA	AARA011903	AMIN001852	AALB001625	3
MZ22517997	NA	NA	AMIN010478	NA	1
MZ22518158	NA	NA	NA	AALB004786	1
MZ22518332	NA	NA	AMIN004346	NA	1
MZ22518446	NA	NA	AMIN000769	NA	1
MZ22518462	AGAP007722	NA	NA	NA	1
MZ22518502	AGAP002513	NA	NA	NA	1
MZ22518581	NA	AARA000948	AMIN001527	AALB000562	3
MZ22518616	NA	AARA004331	NA	NA	1
MZ22518733	NA	AARA002933	NA	NA	1
MZ22518787	NA	NA	NA	AALB009422	1
MZ22518943	AGAP007643	AARA008206	AMIN010284	NA	3
MZ22518981	NA	NA	AMIN010378	NA	1
MZ22519094	NA	NA	AMIN011500	NA	1
MZ22519175	NA	NA	AMIN011080	NA	1
MZ22519293	NA	AARA001828	NA	NA	1
MZ22519513	NA	NA	NA	AALB005227	1
MZ22519522	NA	NA	AMIN008274	NA	1
MZ22519553	NA	AARA009398	NA	NA	1
MZ22519555	NA	AARA011075	NA	NA	1
MZ22519603	NA	NA	AMIN002555	AALB009569	2
MZ22519692	NA	NA	NA	AALB005401	1
MZ22519753	NA	NA	AMIN000571	NA	1
MZ22519827	NA	NA	AMIN011069	NA	1
MZ22519924	NA	AARA010296	NA	NA	1
MZ22519962	NA	NA	NA	AALB000825	1
MZ22520012	NA	NA	AMIN011002	AALB004132	2
MZ22520057	AGAP011470	NA	NA	NA	1
MZ22520378	NA	NA	AMIN001148	NA	1
MZ22520451	NA	NA	AMIN001178	NA	1
MZ22520456	NA	NA	AMIN010602	NA	1
MZ22520473	NA	AARA000790	NA	NA	1
MZ22520475	NA	NA	AMIN011586	NA	1
MZ22520477	NA	NA	AMIN004330	NA	1
MZ22520703	NA	AARA009467	NA	NA	1
MZ22520730	NA	NA	AMIN004280	NA	1
MZ22520838	NA	NA	AMIN005513	NA	1
MZ22521004	NA	NA	AMIN010344	NA	1
MZ22521073	NA	NA	NA	AALB004167	1
MZ22521143	NA	AARA009089	AMIN010085	NA	2
MZ22521166	NA	AARA001022	NA	NA	1
MZ22521233	NA	AARA002399	NA	AALB004808	2
MZ22521370	NA	NA	NA	AALB002242	1
MZ22521487	AGAP008708	AARA010891	NA	AALB000959	3
MZ22521532	NA	NA	AMIN008085	NA	1
MZ22521685	NA	NA	AMIN003000	NA	1
MZ22521691	NA	AARA008077	NA	NA	1
MZ22521696	NA	NA	NA	AALB007425	1
MZ22521714	NA	NA	AMIN000010	NA	1
MZ22521755	NA	NA	AMIN008158	NA	1
MZ22521820	NA	AARA011054	AMIN001438	NA	2
MZ22521826	NA	NA	AMIN005849	NA	1
MZ22521834	NA	AARA003427	NA	NA	1
MZ22521923	NA	AARA001469	NA	NA	1
MZ22521939	NA	NA	NA	AALB002611	1
MZ22521950	NA	NA	AMIN005852	NA	1
MZ22522304	NA	NA	AMIN006842	NA	1
MZ22522507	NA	NA	AMIN008928	NA	1
MZ22522780	NA	AARA011951	AMIN006335	NA	2
MZ22522922	NA	AARA014216	NA	NA	1
MZ22523050	NA	NA	NA	AALB003674	1
MZ22523110	NA	AARA004387	NA	NA	1
MZ22523896	NA	NA	AMIN010031	NA	1
MZ22524021	NA	NA	NA	AALB010342	1
MZ22524030	NA	NA	AMIN006611	NA	1
MZ22524038	AGAP008303	NA	NA	NA	1
MZ22524119	NA	NA	AMIN008020	NA	1
MZ22524211	NA	NA	AMIN004626	NA	1
MZ22524298	NA	NA	AMIN002731	AALB009717	2
MZ22524317	NA	AARA005248	NA	NA	1
MZ22524357	NA	AARA009070	NA	NA	1
MZ22524366	NA	AARA007485	NA	NA	1
MZ22524691	NA	NA	NA	AALB000860	1
MZ22524960	NA	NA	NA	AALB003696	1
MZ22525012	NA	NA	AMIN009484	NA	1
MZ22525162	NA	NA	AMIN007560	NA	1
MZ22525297	NA	NA	AMIN003002	NA	1
MZ22525378	NA	NA	AMIN010541	NA	1
MZ22525470	AGAP007721	NA	NA	NA	1
MZ22525606	NA	AARA005164	NA	NA	1
MZ22525958	NA	AARA002402	AMIN007428	AALB004812	3
MZ22526187	NA	NA	AMIN011557	NA	1
MZ22526323	NA	NA	NA	AALB002740	1
MZ22526341	NA	NA	AMIN004332	NA	1
MZ22526457	NA	AARA003413	NA	NA	1
MZ22526725	NA	AARA001197	NA	NA	1
MZ22526732	NA	AARA003818	AMIN006771	NA	2
MZ22526771	NA	NA	AMIN005060	NA	1
MZ22526813	NA	NA	AMIN004140	NA	1
MZ22527133	NA	AARA006569	NA	NA	1
MZ22527217	NA	NA	AMIN005853	NA	1
MZ22527322	NA	NA	AMIN005850	NA	1
MZ22527391	NA	NA	NA	AALB007727	1
MZ22529945	AGAP010639	NA	NA	NA	1

## Sheet: CvsRT_M
OrthoGroup	gam_spliced	ara_spliced	min_spliced	alb_spliced	num_spliced
MZ22500019	NA	NA	NA	AALB008645	1
MZ22500020	NA	NA	NA	AALB010156	1
MZ22500024	NA	NA	NA	AALB009416	1
MZ22500043	NA	NA	NA	AALB000776	1
MZ22500053	NA	NA	NA	AALB005215	1
MZ22500063	NA	NA	AMIN009491	AALB000783	2
MZ22500088	AGAP008482	NA	NA	NA	1
MZ22500098	NA	NA	NA	AALB009472	1
MZ22500101	NA	NA	NA	AALB010638	1
MZ22500105	NA	NA	NA	AALB004898	1
MZ22500111	NA	AARA011908	NA	NA	1
MZ22500179	NA	NA	NA	AALB009387	1
MZ22500182	NA	NA	AMIN008676	NA	1
MZ22500214	NA	NA	NA	AALB002929	1
MZ22500234	NA	AARA003002	NA	NA	1
MZ22500257	NA	AARA008715	NA	NA	1
MZ22500275	NA	AARA005599	NA	NA	1
MZ22500278	NA	NA	NA	AALB001906	1
MZ22500287	AGAP005739	NA	NA	NA	1
MZ22500292	NA	NA	NA	AALB004006	1
MZ22500306	NA	NA	NA	AALB005468	1
MZ22500334	NA	NA	NA	AALB004032	1
MZ22500366	NA	NA	AMIN000813	NA	1
MZ22500367	NA	NA	AMIN007860	AALB005613	2
MZ22500391	NA	NA	NA	AALB009942	1
MZ22500430	NA	NA	NA	AALB010556	1
MZ22500442	NA	NA	AMIN002981	AALB009044	2
MZ22500462	AGAP010147	NA	AMIN007227	NA	2
MZ22500509	NA	NA	NA	AALB003617	1
MZ22500523	NA	NA	NA	AALB000543	1
MZ22500573	NA	AARA000302	NA	NA	1
MZ22500580	NA	NA	AMIN000415	NA	1
MZ22500581	NA	NA	NA	AALB001018	1
MZ22500589	AGAP006901	NA	AMIN007678	NA	2
MZ22500591	NA	NA	NA	AALB003428	1
MZ22500630	NA	NA	NA	AALB000237	1
MZ22500638	NA	NA	NA	AALB000139	1
MZ22500640	AGAP001209	NA	NA	NA	1
MZ22500664	NA	NA	NA	AALB008741	1
MZ22500680	NA	AARA005754	NA	NA	1
MZ22500691	AGAP003762	NA	NA	NA	1
MZ22500701	NA	AARA003534	NA	NA	1
MZ22500728	NA	NA	AMIN003728	NA	1
MZ22500757	NA	NA	NA	AALB009919	1
MZ22500775	NA	NA	AMIN010404	AALB005170	2
MZ22500790	NA	NA	AMIN010217	NA	1
MZ22500806	NA	NA	NA	AALB000780	1
MZ22500847	NA	NA	NA	AALB006738	1
MZ22500854	NA	NA	NA	AALB009215	1
MZ22500868	NA	NA	NA	AALB002854	1
MZ22500880	AGAP003439	NA	NA	AALB002837	2
MZ22500931	NA	AARA010236	NA	NA	1
MZ22500978	NA	NA	AMIN006139	NA	1
MZ22501037	AGAP009341	NA	NA	NA	1
MZ22501052	AGAP004302	NA	NA	NA	1
MZ22501066	NA	AARA007576	NA	NA	1
MZ22501068	AGAP006083	AARA007441	NA	NA	2
MZ22501074	NA	NA	NA	AALB004825	1
MZ22501090	NA	NA	NA	AALB002744	1
MZ22501133	NA	NA	NA	AALB000652	1
MZ22501175	AGAP004852	NA	NA	NA	1
MZ22501207	NA	NA	NA	AALB000947	1
MZ22501238	NA	NA	NA	AALB003225	1
MZ22501301	NA	NA	NA	AALB000279	1
MZ22501303	NA	AARA005194	NA	AALB001404	2
MZ22501393	NA	NA	NA	AALB000996	1
MZ22501444	AGAP009579	NA	NA	NA	1
MZ22501492	AGAP003374	NA	NA	NA	1
MZ22501535	NA	NA	NA	AALB003542	1
MZ22501554	NA	NA	NA	AALB005523	1
MZ22501559	NA	NA	AMIN011625	NA	1
MZ22501610	NA	NA	NA	AALB008825	1
MZ22501611	NA	AARA008185	NA	AALB005404	2
MZ22501627	AGAP005639	NA	AMIN010192	AALB004664	3
MZ22501642	NA	NA	AMIN002049	NA	1
MZ22501674	NA	NA	NA	AALB000060	1
MZ22501701	NA	NA	AMIN002613	NA	1
MZ22501734	NA	NA	NA	AALB005760	1
MZ22501735	NA	NA	NA	AALB000835	1
MZ22501760	NA	NA	NA	AALB002722	1
MZ22501765	NA	NA	AMIN010358	NA	1
MZ22501784	NA	NA	NA	AALB009428	1
MZ22501799	NA	NA	NA	AALB004772	1
MZ22501809	NA	AARA000875	AMIN008000	NA	2
MZ22501815	NA	NA	NA	AALB002385	1
MZ22501838	NA	NA	NA	AALB008826	1
MZ22501852	NA	AARA006000	NA	NA	1
MZ22501873	AGAP007512	NA	NA	NA	1
MZ22501887	NA	NA	NA	AALB000922	1
MZ22501889	NA	AARA008688	AMIN009693	NA	2
MZ22501906	NA	NA	NA	AALB001403	1
MZ22501913	NA	AARA011515	NA	NA	1
MZ22501951	NA	NA	NA	AALB007574	1
MZ22501956	NA	NA	NA	AALB000346	1
MZ22501960	NA	NA	AMIN003979	NA	1
MZ22501966	NA	NA	NA	AALB003365	1
MZ22501975	NA	NA	NA	AALB004730	1
MZ22501991	NA	NA	NA	AALB008712	1
MZ22501992	NA	NA	AMIN002899	NA	1
MZ22501997	NA	NA	NA	AALB004732	1
MZ22502005	NA	AARA004989	NA	NA	1
MZ22502101	AGAP008873	NA	NA	NA	1
MZ22502113	NA	NA	NA	AALB002986	1
MZ22502115	NA	NA	NA	AALB004606	1
MZ22502118	NA	AARA002741	NA	NA	1
MZ22502144	NA	NA	AMIN005907	NA	1
MZ22502156	NA	NA	NA	AALB008664	1
MZ22502172	NA	NA	NA	AALB008869	1
MZ22502175	NA	NA	AMIN008338	NA	1
MZ22502187	NA	NA	NA	AALB002260	1
MZ22502275	NA	NA	AMIN009186	NA	1
MZ22502283	NA	NA	NA	AALB014497	1
MZ22502288	NA	NA	NA	AALB005336	1
MZ22502296	AGAP001113	AARA001593	NA	NA	2
MZ22502306	NA	AARA010961	NA	NA	1
MZ22502307	NA	NA	NA	AALB005723	1
MZ22502328	NA	NA	AMIN000495	NA	1
MZ22502350	NA	NA	NA	AALB001761	1
MZ22502404	NA	NA	AMIN006879	NA	1
MZ22502478	AGAP003937	NA	AMIN000295	NA	2
MZ22502551	NA	NA	NA	AALB004150	1
MZ22502590	AGAP012424	NA	NA	NA	1
MZ22502600	NA	NA	NA	AALB010190	1
MZ22502605	NA	NA	AMIN003554	NA	1
MZ22502609	NA	NA	AMIN008538	AALB010598	2
MZ22502650	AGAP002434	NA	NA	AALB002943	2
MZ22502661	NA	AARA008102	NA	NA	1
MZ22502662	NA	NA	NA	AALB004106	1
MZ22502759	NA	NA	NA	AALB009055	1
MZ22502785	NA	AARA010075	NA	NA	1
MZ22502806	NA	NA	NA	AALB007906	1
MZ22502814	NA	AARA001591	AMIN002351	NA	2
MZ22502852	NA	NA	NA	AALB001086	1
MZ22502872	NA	NA	AMIN011319	NA	1
MZ22502874	NA	NA	NA	AALB000921	1
MZ22502892	NA	NA	NA	AALB003695	1
MZ22502900	NA	NA	AMIN008113	NA	1
MZ22502915	NA	NA	AMIN009733	NA	1
MZ22502933	NA	NA	AMIN005887	NA	1
MZ22502961	NA	NA	NA	AALB008952	1
MZ22502972	NA	NA	AMIN007907	NA	1
MZ22502979	AGAP002149	NA	NA	AALB002247	2
MZ22502980	AGAP007163	AARA007818	NA	NA	2
MZ22502998	NA	AARA001557	NA	AALB003682	2
MZ22503007	AGAP005832	NA	AMIN011173	NA	2
MZ22503026	NA	NA	AMIN009016	NA	1
MZ22503037	NA	NA	NA	AALB009253	1
MZ22503107	NA	NA	NA	AALB007270	1
MZ22503127	NA	NA	NA	AALB005445	1
MZ22503134	NA	NA	NA	AALB008123	1
MZ22503141	NA	NA	AMIN008367	NA	1
MZ22503164	NA	NA	AMIN000346	AALB008865	2
MZ22503192	NA	NA	NA	AALB010844	1
MZ22503215	NA	AARA008212	NA	NA	1
MZ22503226	NA	NA	AMIN008743	AALB010063	2
MZ22503236	NA	NA	NA	AALB004920	1
MZ22503249	NA	NA	NA	AALB000174	1
MZ22503261	NA	NA	NA	AALB002322	1
MZ22503266	NA	NA	AMIN002395	AALB009237	2
MZ22503271	NA	NA	NA	AALB008677	1
MZ22503280	NA	NA	AMIN003802	NA	1
MZ22503281	NA	NA	NA	AALB010340	1
MZ22503287	NA	AARA010048	NA	NA	1
MZ22503295	NA	NA	NA	AALB007999	1
MZ22503318	AGAP004937	NA	NA	NA	1
MZ22503370	NA	NA	NA	AALB002745	1
MZ22503376	NA	AARA011884	NA	NA	1
MZ22503384	NA	NA	NA	AALB005434	1
MZ22503387	NA	AARA001065	NA	NA	1
MZ22503388	AGAP003687	NA	NA	NA	1
MZ22503389	NA	NA	AMIN000696	AALB003072	2
MZ22503461	NA	NA	NA	AALB001001	1
MZ22503465	NA	NA	NA	AALB002739	1
MZ22503492	NA	NA	NA	AALB005590	1
MZ22503552	NA	NA	NA	AALB006903	1
MZ22503553	NA	NA	AMIN010966	NA	1
MZ22503563	NA	NA	AMIN009619	NA	1
MZ22503574	NA	NA	AMIN008239	AALB010141	2
MZ22503582	NA	NA	AMIN006356	NA	1
MZ22503701	NA	NA	NA	AALB004259	1
MZ22503720	NA	NA	NA	AALB002850	1
MZ22503731	NA	NA	NA	AALB010189	1
MZ22503740	NA	NA	NA	AALB007843	1
MZ22503741	NA	NA	NA	AALB004742	1
MZ22503756	NA	NA	NA	AALB010841	1
MZ22503797	NA	AARA003761	NA	AALB000889	2
MZ22503832	NA	NA	NA	AALB003967	1
MZ22503833	NA	NA	NA	AALB008201	1
MZ22503842	NA	NA	NA	AALB007152	1
MZ22503852	NA	NA	NA	AALB009493	1
MZ22503901	NA	NA	NA	AALB000500	1
MZ22503915	NA	NA	NA	AALB009653	1
MZ22503920	NA	AARA010072	NA	AALB007122	2
MZ22503940	NA	AARA006402	NA	NA	1
MZ22504001	NA	NA	NA	AALB004546	1
MZ22504022	NA	NA	AMIN005321	NA	1
MZ22504062	NA	NA	NA	AALB004090	1
MZ22504101	NA	NA	AMIN003724	AALB002398	2
MZ22504148	NA	NA	NA	AALB000716	1
MZ22504174	AGAP007642	AARA008205	NA	NA	2
MZ22504180	NA	AARA002182	NA	AALB008586	2
MZ22504182	NA	NA	AMIN003356	NA	1
MZ22504191	NA	NA	NA	AALB005888	1
MZ22504206	NA	NA	NA	AALB005849	1
MZ22504207	NA	NA	AMIN011374	NA	1
MZ22504238	NA	AARA003278	NA	NA	1
MZ22504247	NA	NA	NA	AALB004172	1
MZ22504267	NA	AARA003426	NA	NA	1
MZ22504268	NA	NA	AMIN007181	NA	1
MZ22504274	NA	NA	AMIN002878	AALB003120	2
MZ22504283	NA	NA	AMIN003581	NA	1
MZ22504300	NA	AARA004661	NA	NA	1
MZ22504327	AGAP011331	NA	NA	NA	1
MZ22504359	NA	NA	NA	AALB005575	1
MZ22504386	NA	NA	NA	AALB001458	1
MZ22504391	AGAP001165	NA	NA	NA	1
MZ22504426	NA	NA	NA	AALB007551	1
MZ22504430	NA	NA	NA	AALB000511	1
MZ22504445	NA	NA	AMIN001102	AALB002926	2
MZ22504476	AGAP008310	NA	NA	NA	1
MZ22504546	AGAP005742	NA	NA	AALB005260	2
MZ22504630	NA	AARA008089	NA	AALB005167	2
MZ22504672	AGAP002638	NA	NA	NA	1
MZ22504683	NA	NA	AMIN009509	NA	1
MZ22504693	NA	NA	NA	AALB003602	1
MZ22504710	NA	NA	AMIN010650	NA	1
MZ22504728	NA	NA	AMIN004223	NA	1
MZ22504729	NA	NA	NA	AALB001672	1
MZ22504731	NA	NA	AMIN003774	AALB003935	2
MZ22504757	NA	NA	NA	AALB004318	1
MZ22504775	NA	AARA001779	NA	NA	1
MZ22504806	AGAP012423	NA	NA	NA	1
MZ22504848	NA	AARA001429	NA	NA	1
MZ22504908	NA	NA	NA	AALB004510	1
MZ22504912	AGAP002071	NA	NA	NA	1
MZ22504914	NA	NA	AMIN010887	NA	1
MZ22504922	NA	NA	NA	AALB004332	1
MZ22504938	NA	NA	AMIN004802	NA	1
MZ22504984	NA	NA	AMIN001666	NA	1
MZ22505074	NA	NA	NA	AALB006642	1
MZ22505111	NA	AARA011909	NA	NA	1
MZ22505229	NA	NA	NA	AALB010652	1
MZ22505242	NA	NA	AMIN002734	NA	1
MZ22505297	NA	NA	AMIN008312	NA	1
MZ22505302	NA	NA	NA	AALB004720	1
MZ22505334	NA	NA	NA	AALB000161	1
MZ22505339	NA	NA	AMIN011411	NA	1
MZ22505360	NA	AARA008215	AMIN010294	NA	2
MZ22505374	AGAP005111	NA	NA	NA	1
MZ22505376	NA	NA	NA	AALB000828	1
MZ22505427	NA	NA	NA	AALB010818	1
MZ22505458	NA	NA	NA	AALB007460	1
MZ22505527	NA	NA	AMIN004502	NA	1
MZ22505544	NA	NA	AMIN009361	NA	1
MZ22505556	AGAP001678	NA	NA	AALB008065	2
MZ22505562	AGAP008596	AARA010993	NA	NA	2
MZ22505599	AGAP001512	NA	NA	NA	1
MZ22505617	NA	AARA002400	NA	NA	1
MZ22505703	NA	NA	NA	AALB004854	1
MZ22505732	NA	AARA011552	NA	NA	1
MZ22505769	NA	NA	AMIN001910	NA	1
MZ22505773	NA	NA	NA	AALB008714	1
MZ22505777	NA	NA	AMIN002354	NA	1
MZ22505794	NA	NA	AMIN005976	NA	1
MZ22505797	NA	NA	AMIN001002	AALB000406	2
MZ22505804	NA	NA	AMIN009277	NA	1
MZ22505846	NA	NA	NA	AALB005773	1
MZ22505873	AGAP005634	AARA005763	NA	NA	2
MZ22505953	NA	AARA005084	NA	NA	1
MZ22505978	NA	NA	AMIN006358	NA	1
MZ22506006	NA	NA	NA	AALB006343	1
MZ22506015	NA	AARA011314	NA	NA	1
MZ22506024	NA	NA	NA	AALB000933	1
MZ22506049	AGAP005557	NA	NA	AALB004215	2
MZ22506050	NA	NA	NA	AALB010289	1
MZ22506063	NA	NA	NA	AALB007432	1
MZ22506066	NA	NA	AMIN006644	NA	1
MZ22506071	NA	NA	NA	AALB001150	1
MZ22506089	NA	NA	NA	AALB005776	1
MZ22506091	NA	NA	NA	AALB003858	1
MZ22506104	NA	NA	NA	AALB008612	1
MZ22506121	NA	NA	AMIN002070	NA	1
MZ22506170	AGAP010870	NA	NA	NA	1
MZ22506226	NA	NA	AMIN002838	NA	1
MZ22506280	NA	NA	NA	AALB007881	1
MZ22506292	NA	NA	AMIN005100	NA	1
MZ22506331	NA	NA	NA	AALB009010	1
MZ22506345	NA	AARA010373	NA	NA	1
MZ22506349	NA	NA	NA	AALB004827	1
MZ22506463	NA	NA	NA	AALB002840	1
MZ22506493	NA	NA	AMIN001356	NA	1
MZ22506555	NA	NA	NA	AALB010724	1
MZ22506565	NA	AARA006559	NA	NA	1
MZ22506577	NA	AARA007164	NA	NA	1
MZ22506585	AGAP005635	AARA005762	NA	NA	2
MZ22506626	NA	NA	NA	AALB006967	1
MZ22506634	NA	NA	NA	AALB006931	1
MZ22506648	NA	NA	NA	AALB008172	1
MZ22506651	AGAP004071	NA	NA	NA	1
MZ22506654	AGAP007935	NA	NA	NA	1
MZ22506670	NA	NA	NA	AALB000663	1
MZ22506671	NA	NA	NA	AALB003216	1
MZ22506676	NA	NA	NA	AALB009887	1
MZ22506733	NA	NA	AMIN006767	NA	1
MZ22506753	NA	NA	AMIN008852	NA	1
MZ22506813	AGAP003124	AARA001225	NA	NA	2
MZ22506835	NA	NA	NA	AALB009879	1
MZ22506868	NA	NA	AMIN009194	NA	1
MZ22506893	AGAP010050	NA	NA	NA	1
MZ22506929	NA	NA	NA	AALB005428	1
MZ22506941	AGAP009610	NA	NA	NA	1
MZ22506956	NA	NA	NA	AALB000497	1
MZ22507017	NA	NA	AMIN000647	NA	1
MZ22507021	NA	NA	NA	AALB005257	1
MZ22507027	NA	NA	NA	AALB003945	1
MZ22507033	NA	AARA001425	NA	NA	1
MZ22507035	AGAP008408	NA	NA	NA	1
MZ22507077	NA	NA	NA	AALB005930	1
MZ22507115	AGAP007525	AARA008094	AMIN010402	NA	3
MZ22507125	NA	NA	AMIN009978	NA	1
MZ22507169	NA	NA	NA	AALB000594	1
MZ22507182	NA	NA	NA	AALB003784	1
MZ22507208	NA	NA	AMIN002505	NA	1
MZ22507232	AGAP005032	AARA003149	NA	NA	2
MZ22507236	NA	NA	NA	AALB002823	1
MZ22507244	NA	NA	AMIN010992	NA	1
MZ22507285	NA	NA	NA	AALB003197	1
MZ22507330	NA	NA	NA	AALB009064	1
MZ22507345	NA	NA	NA	AALB001603	1
MZ22507539	NA	NA	AMIN004687	NA	1
MZ22507799	NA	NA	NA	AALB009751	1
MZ22507822	NA	NA	NA	AALB007243	1
MZ22507856	AGAP003120	NA	AMIN004662	AALB003435	3
MZ22507893	NA	NA	AMIN002751	AALB003116	2
MZ22507899	NA	NA	AMIN009131	NA	1
MZ22507940	NA	NA	NA	AALB004769	1
MZ22507961	NA	NA	AMIN000266	NA	1
MZ22507967	NA	NA	NA	AALB001527	1
MZ22508005	NA	NA	NA	AALB008842	1
MZ22508018	NA	NA	AMIN002353	NA	1
MZ22508080	NA	NA	NA	AALB002240	1
MZ22508134	NA	NA	AMIN002168	NA	1
MZ22508184	NA	AARA004024	NA	NA	1
MZ22508219	NA	NA	NA	AALB010533	1
MZ22508224	NA	NA	NA	AALB006210	1
MZ22508253	AGAP007596	NA	AMIN010212	AALB006199	3
MZ22508305	NA	NA	NA	AALB000017	1
MZ22508320	NA	NA	NA	AALB005931	1
MZ22508343	NA	NA	AMIN000700	AALB003074	2
MZ22508375	NA	NA	NA	AALB006370	1
MZ22508397	NA	AARA004660	NA	NA	1
MZ22508404	NA	NA	NA	AALB009339	1
MZ22508432	NA	NA	NA	AALB003600	1
MZ22508478	NA	AARA007605	NA	NA	1
MZ22508565	NA	NA	NA	AALB002386	1
MZ22508615	AGAP006346	NA	NA	NA	1
MZ22508660	AGAP007847	AARA012043	NA	AALB001905	3
MZ22508734	AGAP004485	NA	AMIN004861	AALB009608	3
MZ22508746	NA	NA	AMIN009953	AALB005038	2
MZ22508753	NA	NA	NA	AALB003027	1
MZ22508771	NA	NA	NA	AALB000257	1
MZ22508824	NA	NA	NA	AALB001896	1
MZ22508832	NA	AARA000795	NA	NA	1
MZ22508887	AGAP002047	NA	NA	NA	1
MZ22508888	AGAP005556	NA	AMIN010873	NA	2
MZ22508907	NA	NA	AMIN011459	NA	1
MZ22509012	NA	AARA003056	NA	NA	1
MZ22509054	NA	NA	NA	AALB008521	1
MZ22509079	NA	AARA007482	NA	NA	1
MZ22509082	AGAP001884	NA	NA	NA	1
MZ22509180	NA	AARA006195	NA	NA	1
MZ22509194	NA	NA	NA	AALB002100	1
MZ22509202	NA	AARA002918	NA	AALB004321	2
MZ22509232	AGAP009831	NA	NA	NA	1
MZ22509264	NA	NA	AMIN009044	NA	1
MZ22509274	NA	NA	AMIN003704	NA	1
MZ22509303	NA	NA	NA	AALB001961	1
MZ22509319	NA	NA	NA	AALB009153	1
MZ22509357	NA	NA	NA	AALB005088	1
MZ22509466	NA	NA	NA	AALB003520	1
MZ22509473	NA	NA	NA	AALB002681	1
MZ22509478	AGAP001419	NA	NA	AALB008291	2
MZ22509503	AGAP008328	AARA011238	AMIN005974	NA	3
MZ22509545	NA	NA	AMIN010749	AALB004378	2
MZ22509574	NA	NA	AMIN008385	NA	1
MZ22509612	NA	AARA004641	AMIN003662	AALB008904	3
MZ22509618	NA	NA	AMIN006360	NA	1
MZ22509623	NA	AARA003476	NA	NA	1
MZ22509633	NA	NA	AMIN003853	AALB002849	2
MZ22509656	NA	NA	NA	AALB003183	1
MZ22509706	NA	NA	NA	AALB010821	1
MZ22509715	AGAP004635	NA	NA	NA	1
MZ22509722	NA	AARA006938	NA	NA	1
MZ22509749	NA	NA	NA	AALB001258	1
MZ22509759	NA	NA	AMIN010690	NA	1
MZ22509827	NA	NA	NA	AALB003400	1
MZ22509841	NA	NA	NA	AALB000796	1
MZ22509864	NA	NA	NA	AALB009713	1
MZ22509873	NA	NA	AMIN008906	NA	1
MZ22509905	NA	NA	NA	AALB008074	1
MZ22510054	NA	NA	NA	AALB004251	1
MZ22510083	NA	NA	NA	AALB010633	1
MZ22510145	NA	NA	NA	AALB004639	1
MZ22510146	NA	NA	AMIN004756	NA	1
MZ22510163	AGAP002028	NA	NA	NA	1
MZ22510165	NA	AARA005284	NA	NA	1
MZ22510173	NA	NA	NA	AALB004910	1
MZ22510254	AGAP002971	AARA004787	NA	NA	2
MZ22510262	NA	AARA009557	NA	NA	1
MZ22510347	NA	AARA004478	AMIN002663	NA	2
MZ22510354	NA	NA	NA	AALB005417	1
MZ22510397	AGAP009897	NA	AMIN006837	AALB001141	3
MZ22510417	NA	NA	NA	AALB001446	1
MZ22510451	NA	AARA008197	NA	NA	1
MZ22510516	NA	NA	NA	AALB002603	1
MZ22510642	NA	NA	AMIN000799	AALB002290	2
MZ22510643	NA	AARA000589	NA	NA	1
MZ22510668	NA	NA	NA	AALB002513	1
MZ22510707	NA	NA	NA	AALB007201	1
MZ22510743	NA	AARA002404	NA	NA	1
MZ22510765	NA	NA	AMIN002456	NA	1
MZ22510794	AGAP006819	NA	NA	NA	1
MZ22510799	NA	AARA004708	NA	AALB003451	2
MZ22510902	NA	NA	NA	AALB003966	1
MZ22510942	NA	NA	NA	AALB009459	1
MZ22510956	AGAP000792	NA	NA	NA	1
MZ22511109	NA	NA	NA	AALB001503	1
MZ22511127	NA	NA	NA	AALB004643	1
MZ22511173	NA	NA	NA	AALB008711	1
MZ22511207	AGAP011870	AARA000674	NA	AALB003819	3
MZ22511238	AGAP011715	NA	AMIN008745	NA	2
MZ22511263	NA	AARA011341	NA	NA	1
MZ22511335	NA	NA	NA	AALB000421	1
MZ22511373	NA	NA	NA	AALB005573	1
MZ22511406	NA	AARA011881	NA	NA	1
MZ22511420	AGAP005088	NA	AMIN007592	NA	2
MZ22511510	AGAP009224	AARA008756	NA	NA	2
MZ22511564	NA	NA	NA	AALB009096	1
MZ22511594	NA	NA	AMIN001648	NA	1
MZ22511618	NA	AARA011911	NA	NA	1
MZ22511673	AGAP007942	NA	NA	NA	1
MZ22511691	NA	NA	NA	AALB004290	1
MZ22511723	NA	NA	AMIN007179	NA	1
MZ22511756	NA	AARA008627	NA	NA	1
MZ22511762	AGAP005079	AARA003099	NA	NA	2
MZ22511838	NA	AARA001224	NA	NA	1
MZ22511918	NA	NA	AMIN008120	NA	1
MZ22511941	NA	NA	NA	AALB004322	1
MZ22511950	NA	NA	AMIN004791	NA	1
MZ22511952	NA	NA	AMIN003917	AALB003516	2
MZ22512001	NA	NA	AMIN003852	AALB002848	2
MZ22512030	NA	AARA002275	NA	NA	1
MZ22512066	NA	NA	NA	AALB009415	1
MZ22512111	NA	NA	NA	AALB003401	1
MZ22512156	NA	NA	AMIN002492	NA	1
MZ22512284	NA	AARA004518	AMIN000225	NA	2
MZ22512352	AGAP001913	NA	NA	NA	1
MZ22512361	NA	NA	NA	AALB000918	1
MZ22512367	AGAP005828	AARA007681	AMIN011169	NA	3
MZ22512375	NA	NA	NA	AALB003212	1
MZ22512433	AGAP002127	NA	NA	NA	1
MZ22512462	NA	AARA006848	NA	NA	1
MZ22512498	NA	NA	NA	AALB004623	1
MZ22512555	NA	NA	NA	AALB002652	1
MZ22512577	NA	AARA001634	NA	NA	1
MZ22512626	NA	NA	NA	AALB010368	1
MZ22512632	AGAP006576	NA	NA	NA	1
MZ22512714	NA	NA	NA	AALB006068	1
MZ22512742	NA	AARA001951	NA	NA	1
MZ22512743	AGAP004273	NA	AMIN004076	NA	2
MZ22512752	NA	NA	AMIN000306	NA	1
MZ22512763	NA	AARA007610	NA	NA	1
MZ22512860	NA	NA	NA	AALB004775	1
MZ22512943	NA	AARA002164	NA	NA	1
MZ22512944	NA	NA	NA	AALB005303	1
MZ22512947	NA	NA	NA	AALB009886	1
MZ22513012	AGAP011312	NA	NA	NA	1
MZ22513025	NA	NA	NA	AALB004372	1
MZ22513030	NA	NA	AMIN005787	NA	1
MZ22513077	NA	NA	AMIN011581	NA	1
MZ22513095	AGAP010070	NA	NA	NA	1
MZ22513102	NA	NA	NA	AALB002671	1
MZ22513133	AGAP008415	NA	NA	NA	1
MZ22513169	NA	NA	AMIN004429	AALB010122	2
MZ22513185	NA	AARA003423	NA	NA	1
MZ22513189	NA	NA	AMIN000255	NA	1
MZ22513203	AGAP008662	NA	NA	NA	1
MZ22513238	AGAP010134	AARA003662	NA	NA	2
MZ22513254	NA	NA	NA	AALB002302	1
MZ22513268	AGAP002147	NA	NA	NA	1
MZ22513315	NA	NA	NA	AALB003010	1
MZ22513354	AGAP007766	NA	NA	NA	1
MZ22513370	NA	NA	NA	AALB003003	1
MZ22513383	AGAP006136	NA	NA	NA	1
MZ22513400	NA	NA	AMIN011433	NA	1
MZ22513447	AGAP008476	NA	NA	NA	1
MZ22513619	NA	NA	NA	AALB006331	1
MZ22513628	AGAP006260	AARA007278	NA	AALB003248	3
MZ22513635	NA	NA	NA	AALB009393	1
MZ22513637	NA	NA	NA	AALB008076	1
MZ22513644	AGAP005920	NA	NA	NA	1
MZ22513674	NA	NA	NA	AALB001394	1
MZ22513696	NA	NA	NA	AALB010567	1
MZ22513706	NA	NA	AMIN010981	NA	1
MZ22513716	AGAP001577	NA	NA	NA	1
MZ22513779	NA	NA	NA	AALB007283	1
MZ22513788	NA	NA	AMIN009181	NA	1
MZ22513791	AGAP002266	NA	AMIN000137	NA	2
MZ22513919	NA	NA	AMIN003273	NA	1
MZ22513966	NA	AARA000591	NA	NA	1
MZ22514040	NA	NA	NA	AALB005851	1
MZ22514043	NA	NA	NA	AALB009491	1
MZ22514054	NA	NA	NA	AALB007831	1
MZ22514112	NA	NA	NA	AALB007842	1
MZ22514119	AGAP010376	NA	NA	NA	1
MZ22514136	NA	AARA001953	NA	NA	1
MZ22514143	NA	NA	NA	AALB008175	1
MZ22514148	NA	NA	NA	AALB008167	1
MZ22514217	NA	AARA005078	NA	NA	1
MZ22514226	AGAP007593	NA	AMIN010216	AALB006201	3
MZ22514227	NA	AARA006383	NA	NA	1
MZ22514248	NA	NA	NA	AALB001641	1
MZ22514310	NA	AARA007272	NA	NA	1
MZ22514331	NA	NA	NA	AALB009525	1
MZ22514337	NA	NA	NA	AALB006171	1
MZ22514353	NA	NA	AMIN001096	NA	1
MZ22514358	NA	NA	NA	AALB004224	1
MZ22514423	NA	NA	NA	AALB006693	1
MZ22514457	AGAP008443	AARA011123	AMIN009799	AALB000622	4
MZ22514525	NA	NA	NA	AALB009710	1
MZ22514530	NA	NA	AMIN007865	NA	1
MZ22514542	NA	NA	NA	AALB006902	1
MZ22514659	NA	NA	AMIN008927	NA	1
MZ22514676	NA	AARA011514	NA	NA	1
MZ22514723	AGAP006800	NA	NA	AALB005283	2
MZ22514724	NA	NA	AMIN010989	NA	1
MZ22514747	NA	NA	AMIN005628	NA	1
MZ22514765	NA	AARA006382	NA	NA	1
MZ22514929	NA	NA	NA	AALB005780	1
MZ22514960	NA	NA	NA	AALB004291	1
MZ22514970	NA	NA	NA	AALB003806	1
MZ22515000	NA	NA	NA	AALB000459	1
MZ22515038	NA	AARA002274	NA	NA	1
MZ22515046	NA	NA	AMIN010871	NA	1
MZ22515063	NA	NA	AMIN002554	NA	1
MZ22515071	NA	NA	NA	AALB010002	1
MZ22515102	NA	NA	AMIN000055	NA	1
MZ22515106	NA	NA	AMIN001552	AALB000544	2
MZ22515124	NA	AARA002378	NA	NA	1
MZ22515126	NA	AARA005325	NA	NA	1
MZ22515184	NA	AARA007042	NA	AALB008833	2
MZ22515292	NA	NA	NA	AALB008028	1
MZ22515339	AGAP006448	NA	NA	NA	1
MZ22515486	NA	AARA002376	NA	NA	1
MZ22515558	NA	NA	NA	AALB002377	1
MZ22515611	AGAP003114	NA	NA	NA	1
MZ22515663	NA	NA	NA	AALB009806	1
MZ22515834	AGAP011554	NA	AMIN008883	AALB010111	3
MZ22515847	NA	AARA008628	NA	NA	1
MZ22515856	NA	NA	AMIN010747	AALB004375	2
MZ22515896	NA	AARA011295	NA	NA	1
MZ22515944	NA	NA	NA	AALB004319	1
MZ22515973	NA	AARA009321	NA	AALB004237	2
MZ22516028	AGAP013535	NA	NA	NA	1
MZ22516044	NA	NA	NA	AALB000813	1
MZ22516056	NA	NA	NA	AALB003368	1
MZ22516117	NA	NA	NA	AALB009460	1
MZ22516165	AGAP006141	NA	NA	NA	1
MZ22516185	NA	NA	AMIN009697	NA	1
MZ22516198	AGAP000733	NA	NA	NA	1
MZ22516237	NA	NA	NA	AALB005763	1
MZ22516284	NA	NA	AMIN007929	AALB005203	2
MZ22516348	NA	NA	NA	AALB005524	1
MZ22516401	AGAP006577	NA	NA	NA	1
MZ22516424	NA	AARA002401	NA	AALB004811	2
MZ22516501	NA	NA	NA	AALB010378	1
MZ22516530	AGAP007373	NA	NA	NA	1
MZ22516538	NA	NA	AMIN008491	NA	1
MZ22516566	AGAP001372	AARA001827	AMIN000555	AALB003001	4
MZ22516619	AGAP002935	AARA004753	NA	NA	2
MZ22516643	NA	NA	AMIN003155	NA	1
MZ22516672	NA	AARA010041	AMIN002939	NA	2
MZ22516741	NA	NA	NA	AALB005916	1
MZ22516855	NA	NA	NA	AALB000200	1
MZ22516934	NA	NA	AMIN002937	NA	1
MZ22516949	NA	NA	NA	AALB008259	1
MZ22516950	NA	NA	NA	AALB005231	1
MZ22517039	NA	NA	NA	AALB002295	1
MZ22517085	AGAP006454	NA	NA	AALB005185	2
MZ22517101	NA	NA	AMIN006359	NA	1
MZ22517113	NA	NA	AMIN010001	AALB004250	2
MZ22517132	NA	NA	NA	AALB006985	1
MZ22517254	NA	NA	NA	AALB002283	1
MZ22517263	NA	NA	NA	AALB014493	1
MZ22517293	NA	AARA006969	NA	NA	1
MZ22517349	NA	NA	AMIN003240	NA	1
MZ22517399	NA	AARA002398	NA	AALB004807	2
MZ22517404	NA	NA	NA	AALB009916	1
MZ22517414	AGAP012123	AARA003221	NA	NA	2
MZ22517455	AGAP009415	NA	NA	NA	1
MZ22517469	NA	NA	NA	AALB010238	1
MZ22517573	NA	NA	AMIN008559	NA	1
MZ22517597	NA	NA	AMIN007864	NA	1
MZ22517616	NA	NA	NA	AALB005993	1
MZ22517715	NA	NA	AMIN010022	NA	1
MZ22517744	AGAP008804	NA	NA	NA	1
MZ22517826	NA	AARA007287	NA	NA	1
MZ22517843	NA	NA	NA	AALB000731	1
MZ22517853	NA	NA	NA	AALB004222	1
MZ22517857	NA	AARA001706	NA	NA	1
MZ22517871	AGAP002039	NA	NA	NA	1
MZ22517889	NA	NA	NA	AALB003473	1
MZ22517907	NA	NA	AMIN003659	AALB008902	2
MZ22517969	AGAP009940	NA	AMIN006796	NA	2
MZ22517983	NA	NA	NA	AALB001625	1
MZ22518012	NA	NA	NA	AALB010560	1
MZ22518045	AGAP005552	NA	NA	NA	1
MZ22518086	NA	NA	NA	AALB002228	1
MZ22518110	AGAP009144	NA	NA	NA	1
MZ22518159	NA	NA	NA	AALB006023	1
MZ22518185	NA	NA	NA	AALB008069	1
MZ22518235	NA	AARA007143	NA	NA	1
MZ22518245	NA	NA	NA	AALB008301	1
MZ22518323	NA	NA	NA	AALB007829	1
MZ22518332	NA	NA	NA	AALB010377	1
MZ22518367	AGAP007698	NA	NA	NA	1
MZ22518420	NA	NA	NA	AALB004905	1
MZ22518462	NA	AARA008271	NA	NA	1
MZ22518470	NA	NA	AMIN000220	NA	1
MZ22518502	NA	NA	NA	AALB009223	1
MZ22518580	NA	NA	NA	AALB002303	1
MZ22518581	NA	AARA000948	NA	NA	1
MZ22518621	NA	AARA003287	NA	NA	1
MZ22518688	NA	NA	NA	AALB004768	1
MZ22518690	NA	AARA000746	NA	NA	1
MZ22518813	NA	NA	NA	AALB005204	1
MZ22518876	NA	NA	NA	AALB004300	1
MZ22518943	NA	AARA008206	NA	NA	1
MZ22519000	NA	NA	NA	AALB006692	1
MZ22519002	NA	NA	NA	AALB005664	1
MZ22519094	NA	NA	NA	AALB007329	1
MZ22519114	NA	AARA001961	NA	AALB009159	2
MZ22519147	NA	NA	NA	AALB005473	1
MZ22519173	NA	NA	AMIN008730	NA	1
MZ22519175	NA	NA	AMIN011080	NA	1
MZ22519195	NA	NA	AMIN004533	NA	1
MZ22519252	NA	NA	NA	AALB004487	1
MZ22519303	AGAP008481	NA	NA	NA	1
MZ22519306	NA	NA	NA	AALB008860	1
MZ22519348	NA	NA	AMIN001650	NA	1
MZ22519376	NA	NA	NA	AALB001931	1
MZ22519455	NA	NA	AMIN008235	NA	1
MZ22519500	NA	NA	NA	AALB000468	1
MZ22519513	NA	NA	NA	AALB005227	1
MZ22519519	NA	AARA004907	NA	NA	1
MZ22519527	AGAP007288	NA	NA	NA	1
MZ22519555	NA	NA	NA	AALB000719	1
MZ22519589	NA	NA	AMIN005816	NA	1
MZ22519603	NA	NA	AMIN002555	NA	1
MZ22519692	NA	AARA008182	NA	AALB005401	2
MZ22519737	AGAP001166	NA	NA	NA	1
MZ22519860	AGAP002459	NA	NA	NA	1
MZ22519869	NA	NA	NA	AALB003673	1
MZ22519911	NA	AARA011057	NA	NA	1
MZ22519944	NA	NA	NA	AALB006069	1
MZ22519962	NA	NA	NA	AALB000825	1
MZ22519963	AGAP010404	NA	NA	NA	1
MZ22520020	NA	NA	NA	AALB010140	1
MZ22520194	NA	NA	AMIN009731	NA	1
MZ22520240	NA	NA	AMIN003699	NA	1
MZ22520266	NA	NA	NA	AALB005994	1
MZ22520456	NA	NA	NA	AALB005532	1
MZ22520472	NA	NA	NA	AALB000338	1
MZ22520473	NA	NA	AMIN004430	NA	1
MZ22520514	NA	NA	NA	AALB003348	1
MZ22520519	NA	NA	AMIN003796	NA	1
MZ22520683	NA	NA	NA	AALB005168	1
MZ22520719	NA	NA	NA	AALB001702	1
MZ22520730	NA	NA	NA	AALB010823	1
MZ22520849	NA	AARA001428	NA	NA	1
MZ22520923	NA	NA	NA	AALB006740	1
MZ22520989	NA	AARA002266	NA	NA	1
MZ22521160	NA	NA	NA	AALB002408	1
MZ22521197	NA	NA	NA	AALB001564	1
MZ22521202	NA	NA	AMIN008744	AALB010064	2
MZ22521233	NA	AARA002399	NA	AALB004808	2
MZ22521438	NA	AARA007790	NA	NA	1
MZ22521446	NA	NA	NA	AALB003426	1
MZ22521449	NA	NA	NA	AALB010657	1
MZ22521531	NA	NA	NA	AALB000600	1
MZ22521545	AGAP003547	NA	AMIN000849	NA	2
MZ22521626	NA	AARA006968	NA	NA	1
MZ22521665	NA	AARA005494	NA	NA	1
MZ22521681	NA	NA	NA	AALB007189	1
MZ22521696	NA	NA	AMIN009203	NA	1
MZ22521730	NA	NA	NA	AALB008681	1
MZ22521744	AGAP007764	NA	NA	NA	1
MZ22521755	NA	NA	NA	AALB004759	1
MZ22521775	NA	NA	AMIN011310	NA	1
MZ22521808	NA	AARA006200	NA	AALB008477	2
MZ22521834	NA	AARA003427	NA	NA	1
MZ22521875	NA	AARA002748	NA	NA	1
MZ22521967	NA	NA	AMIN003386	AALB002475	2
MZ22522078	NA	NA	NA	AALB005439	1
MZ22522120	NA	AARA011651	NA	NA	1
MZ22522137	NA	NA	AMIN008110	NA	1
MZ22522186	NA	NA	AMIN002837	NA	1
MZ22522188	AGAP002496	NA	NA	NA	1
MZ22522235	NA	NA	NA	AALB004638	1
MZ22522263	NA	NA	AMIN008524	NA	1
MZ22522277	NA	NA	NA	AALB009762	1
MZ22522302	NA	NA	NA	AALB003217	1
MZ22522406	NA	AARA007609	NA	NA	1
MZ22522418	NA	NA	NA	AALB001640	1
MZ22522426	NA	NA	NA	AALB005290	1
MZ22522505	AGAP009626	NA	NA	AALB000740	2
MZ22522507	AGAP012397	NA	NA	NA	1
MZ22522551	NA	NA	AMIN004793	NA	1
MZ22522725	AGAP003649	NA	AMIN002583	AALB008529	3
MZ22522778	NA	NA	AMIN011580	NA	1
MZ22522846	NA	NA	NA	AALB002101	1
MZ22522922	NA	AARA014216	NA	NA	1
MZ22522989	NA	NA	NA	AALB009334	1
MZ22523031	NA	AARA009320	NA	NA	1
MZ22523050	NA	NA	NA	AALB003674	1
MZ22523280	NA	NA	NA	AALB003620	1
MZ22523295	NA	NA	NA	AALB010726	1
MZ22523296	AGAP005378	NA	NA	AALB005339	2
MZ22523445	AGAP012392	NA	NA	NA	1
MZ22523452	NA	NA	NA	AALB014729	1
MZ22523501	NA	NA	NA	AALB005574	1
MZ22523512	NA	NA	NA	AALB004507	1
MZ22523647	NA	NA	NA	AALB003468	1
MZ22523697	NA	NA	AMIN014252	NA	1
MZ22523750	NA	NA	NA	AALB005092	1
MZ22523751	NA	NA	NA	AALB004486	1
MZ22523829	NA	NA	NA	AALB007274	1
MZ22523896	NA	NA	AMIN010031	NA	1
MZ22523925	NA	NA	AMIN009279	NA	1
MZ22523954	AGAP013102	NA	NA	NA	1
MZ22524014	NA	NA	NA	AALB005356	1
MZ22524021	NA	NA	NA	AALB010342	1
MZ22524038	NA	NA	NA	AALB001545	1
MZ22524158	NA	AARA010914	NA	NA	1
MZ22524180	NA	NA	NA	AALB005169	1
MZ22524257	AGAP006656	NA	NA	NA	1
MZ22524264	NA	NA	AMIN008269	NA	1
MZ22524345	NA	NA	NA	AALB000454	1
MZ22524366	NA	AARA007485	NA	AALB004575	2
MZ22524472	NA	NA	AMIN009556	NA	1
MZ22524506	AGAP010871	NA	NA	NA	1
MZ22524524	NA	NA	NA	AALB007334	1
MZ22524689	AGAP013135	NA	NA	NA	1
MZ22524770	NA	NA	NA	AALB014417	1
MZ22524825	NA	NA	NA	AALB007335	1
MZ22524876	NA	NA	AMIN001023	NA	1
MZ22524885	NA	AARA005240	NA	NA	1
MZ22524940	NA	NA	AMIN010606	NA	1
MZ22524978	NA	NA	AMIN004075	NA	1
MZ22525012	NA	NA	AMIN009484	NA	1
MZ22525037	NA	NA	AMIN002457	NA	1
MZ22525148	NA	NA	NA	AALB010112	1
MZ22525187	NA	NA	NA	AALB003264	1
MZ22525239	NA	NA	NA	AALB009784	1
MZ22525291	NA	AARA000271	NA	NA	1
MZ22525470	NA	AARA008270	NA	AALB006240	2
MZ22525476	NA	NA	AMIN009192	NA	1
MZ22525629	AGAP001335	NA	NA	NA	1
MZ22525898	NA	AARA008346	NA	NA	1
MZ22525958	NA	AARA002402	NA	AALB004812	2
MZ22525959	NA	NA	NA	AALB005200	1
MZ22525964	NA	AARA003763	NA	AALB000891	2
MZ22526049	NA	NA	AMIN009042	NA	1
MZ22526241	NA	NA	NA	AALB008744	1
MZ22526294	NA	NA	AMIN000682	NA	1
MZ22526323	NA	NA	NA	AALB002740	1
MZ22526336	NA	NA	NA	AALB003266	1
MZ22526341	NA	NA	NA	AALB010824	1
MZ22526369	NA	AARA005065	NA	NA	1
MZ22526427	NA	NA	AMIN008527	NA	1
MZ22526431	AGAP012329	AARA003405	NA	NA	2
MZ22526455	NA	NA	AMIN008346	NA	1
MZ22526776	AGAP011555	NA	AMIN008880	AALB010110	3
MZ22526882	NA	NA	NA	AALB007575	1
MZ22526904	NA	NA	AMIN008347	NA	1
MZ22526942	NA	NA	NA	AALB003618	1
MZ22526958	NA	NA	NA	AALB007577	1
MZ22526969	NA	NA	NA	AALB003601	1
MZ22527015	NA	NA	NA	AALB004733	1
MZ22527063	NA	AARA014600	NA	NA	1
MZ22527160	NA	NA	NA	AALB003771	1
MZ22527195	NA	NA	NA	AALB001390	1
MZ22527269	NA	NA	NA	AALB008709	1
MZ22527307	NA	AARA000288	NA	NA	1
MZ22529676	AGAP013205	NA	NA	NA	1
MZ22530703	NA	AARA000287	NA	NA	1

## Sheet: MvsF_C
OrthoGroup	gam_spliced	ara_spliced	min_spliced	alb_spliced	num_spliced
MZ22500117	AGAP007717	NA	NA	NA	1
MZ22500367	NA	NA	AMIN007860	NA	1
MZ22500432	NA	NA	AMIN010640	NA	1
MZ22500589	AGAP006901	NA	NA	NA	1
MZ22500690	NA	AARA001930	NA	NA	1
MZ22500790	NA	NA	AMIN010217	NA	1
MZ22500834	NA	AARA006897	NA	NA	1
MZ22500848	NA	AARA001294	NA	AALB007154	2
MZ22501117	NA	AARA003461	NA	NA	1
MZ22501250	NA	NA	AMIN010642	NA	1
MZ22501631	AGAP000708	NA	NA	NA	1
MZ22501662	NA	NA	AMIN010635	NA	1
MZ22501809	AGAP006366	AARA000875	AMIN008000	NA	3
MZ22502101	NA	AARA009418	NA	NA	1
MZ22502149	NA	NA	AMIN011438	NA	1
MZ22502175	NA	NA	AMIN008338	NA	1
MZ22502260	AGAP009210	NA	NA	NA	1
MZ22502478	AGAP003937	NA	NA	NA	1
MZ22502650	NA	NA	AMIN002701	NA	1
MZ22502661	NA	AARA008102	NA	NA	1
MZ22502737	AGAP002858	NA	NA	NA	1
MZ22502825	NA	NA	AMIN008781	NA	1
MZ22502933	AGAP008929	NA	NA	NA	1
MZ22503127	NA	NA	NA	AALB005445	1
MZ22503321	AGAP009036	NA	NA	NA	1
MZ22503465	NA	AARA006754	NA	NA	1
MZ22503555	NA	AARA005001	NA	NA	1
MZ22503648	AGAP002284	NA	NA	NA	1
MZ22503868	NA	NA	NA	AALB000197	1
MZ22504043	AGAP000815	NA	NA	NA	1
MZ22504283	NA	NA	AMIN003581	NA	1
MZ22504501	NA	AARA007056	NA	NA	1
MZ22504732	NA	NA	AMIN002056	NA	1
MZ22504867	NA	NA	AMIN004561	NA	1
MZ22504922	AGAP005245	NA	NA	NA	1
MZ22505071	NA	NA	AMIN005535	NA	1
MZ22505074	NA	AARA001111	NA	NA	1
MZ22505394	AGAP003586	NA	NA	NA	1
MZ22505504	NA	AARA003317	NA	NA	1
MZ22505657	NA	AARA004275	NA	NA	1
MZ22505854	AGAP006653	AARA008528	NA	NA	2
MZ22505873	AGAP005634	NA	NA	NA	1
MZ22505912	NA	AARA004962	NA	NA	1
MZ22505915	NA	NA	AMIN003449	NA	1
MZ22506020	NA	AARA008045	NA	NA	1
MZ22506151	NA	AARA006365	AMIN004824	NA	2
MZ22506163	AGAP012302	NA	AMIN006874	NA	2
MZ22506438	NA	AARA007575	NA	NA	1
MZ22506541	NA	AARA005868	NA	NA	1
MZ22506585	AGAP005635	NA	NA	NA	1
MZ22506728	AGAP000264	NA	NA	NA	1
MZ22506753	NA	NA	NA	AALB003864	1
MZ22506758	NA	AARA003867	NA	NA	1
MZ22507017	AGAP002093	NA	NA	NA	1
MZ22507060	NA	AARA001996	NA	NA	1
MZ22507135	NA	AARA010699	NA	NA	1
MZ22507329	NA	NA	NA	AALB006224	1
MZ22507498	NA	NA	AMIN003782	NA	1
MZ22507514	AGAP005617	NA	NA	NA	1
MZ22507584	NA	NA	AMIN006944	NA	1
MZ22507598	NA	NA	AMIN003149	NA	1
MZ22507764	AGAP000159	NA	NA	NA	1
MZ22507768	AGAP009928	NA	NA	NA	1
MZ22508253	NA	NA	AMIN010212	NA	1
MZ22508660	AGAP007847	NA	NA	NA	1
MZ22509473	NA	AARA001899	NA	NA	1
MZ22509633	NA	NA	AMIN003853	NA	1
MZ22509722	AGAP002007	NA	NA	NA	1
MZ22509864	NA	NA	AMIN002728	NA	1
MZ22509906	AGAP012360	NA	NA	NA	1
MZ22510039	NA	NA	AMIN011186	NA	1
MZ22510786	AGAP000207	NA	NA	NA	1
MZ22510861	AGAP011700	NA	NA	NA	1
MZ22510973	NA	NA	AMIN001833	NA	1
MZ22511438	NA	NA	NA	AALB003817	1
MZ22511655	NA	NA	NA	AALB004888	1
MZ22512001	NA	NA	AMIN003852	NA	1
MZ22512438	AGAP002728	NA	NA	NA	1
MZ22512554	AGAP009071	NA	NA	NA	1
MZ22512743	NA	AARA011526	NA	NA	1
MZ22512788	AGAP002139	NA	NA	NA	1
MZ22513141	NA	NA	AMIN005112	NA	1
MZ22513243	NA	AARA004299	NA	NA	1
MZ22513309	AGAP004050	AARA009761	AMIN002614	NA	3
MZ22513628	AGAP006260	NA	NA	NA	1
MZ22513706	AGAP005949	NA	NA	NA	1
MZ22513711	NA	NA	NA	AALB003519	1
MZ22513945	NA	AARA003321	NA	NA	1
MZ22514226	NA	AARA008157	AMIN010216	NA	2
MZ22514789	NA	AARA004955	NA	NA	1
MZ22514826	NA	AARA009427	NA	NA	1
MZ22514908	NA	AARA003000	NA	NA	1
MZ22515129	NA	NA	AMIN005272	NA	1
MZ22515131	NA	AARA010560	NA	NA	1
MZ22515343	AGAP012359	NA	NA	NA	1
MZ22515558	NA	NA	AMIN000743	NA	1
MZ22517017	AGAP008499	NA	NA	NA	1
MZ22517026	NA	AARA006953	NA	NA	1
MZ22517671	AGAP002841	NA	NA	NA	1
MZ22517945	AGAP006441	NA	NA	NA	1
MZ22517983	AGAP009477	AARA011903	NA	NA	2
MZ22518115	NA	NA	AMIN005502	NA	1
MZ22518470	NA	NA	AMIN000220	NA	1
MZ22518516	AGAP002131	NA	NA	NA	1
MZ22518914	NA	NA	NA	AALB003815	1
MZ22518960	NA	AARA009200	NA	NA	1
MZ22519114	AGAP001515	AARA001961	NA	NA	2
MZ22519296	NA	AARA006954	NA	NA	1
MZ22519500	AGAP008842	NA	NA	NA	1
MZ22519753	AGAP001394	NA	NA	NA	1
MZ22520489	NA	AARA007815	NA	NA	1
MZ22520688	NA	AARA001295	NA	NA	1
MZ22521166	NA	AARA001022	NA	NA	1
MZ22522790	NA	AARA002998	NA	NA	1
MZ22522853	NA	NA	NA	AALB007808	1
MZ22523406	NA	NA	AMIN006213	NA	1
MZ22524885	AGAP007886	NA	NA	NA	1
MZ22525379	AGAP011250	NA	NA	NA	1
MZ22526323	NA	AARA006755	NA	NA	1
MZ22526455	AGAP011251	NA	NA	NA	1
MZ22526558	AGAP013351	NA	NA	NA	1
MZ22527089	AGAP013717	AARA011977	AMIN006365	NA	3
MZ22527239	NA	AARA010598	NA	NA	1
MZ22529178	NA	AARA003318	NA	NA	1

## Sheet: MvsF_RT
OrthoGroup	gam_spliced	ara_spliced	min_spliced	alb_spliced	num_spliced
MZ22500043	NA	NA	NA	AALB000776	1
MZ22500049	NA	NA	NA	AALB000804	1
MZ22500067	AGAP000222	NA	NA	NA	1
MZ22500088	AGAP008482	NA	NA	NA	1
MZ22500098	NA	NA	NA	AALB009472	1
MZ22500101	NA	AARA008848	NA	NA	1
MZ22500111	NA	NA	AMIN001846	NA	1
MZ22500137	NA	NA	AMIN007073	NA	1
MZ22500138	NA	NA	AMIN003414	NA	1
MZ22500182	NA	NA	AMIN008676	NA	1
MZ22500188	NA	NA	NA	AALB002958	1
MZ22500234	NA	NA	AMIN007340	AALB003200	2
MZ22500275	AGAP011162	AARA005599	AMIN008422	NA	3
MZ22500292	AGAP010895	NA	AMIN009287	AALB004006	3
MZ22500306	NA	NA	AMIN010342	NA	1
MZ22500325	NA	NA	AMIN003171	NA	1
MZ22500327	NA	NA	NA	AALB008522	1
MZ22500342	NA	AARA010635	AMIN001971	NA	2
MZ22500348	NA	NA	AMIN000167	NA	1
MZ22500365	NA	NA	NA	AALB008782	1
MZ22500374	NA	NA	NA	AALB008528	1
MZ22500391	NA	AARA000761	NA	NA	1
MZ22500402	NA	NA	NA	AALB008734	1
MZ22500408	NA	NA	NA	AALB002597	1
MZ22500421	NA	NA	NA	AALB010783	1
MZ22500432	NA	NA	NA	AALB005654	1
MZ22500438	NA	NA	NA	AALB006355	1
MZ22500461	NA	NA	AMIN002682	NA	1
MZ22500523	NA	NA	NA	AALB000543	1
MZ22500557	NA	NA	AMIN010681	NA	1
MZ22500573	NA	NA	AMIN001732	NA	1
MZ22500576	NA	NA	AMIN011282	NA	1
MZ22500581	NA	NA	NA	AALB001018	1
MZ22500585	NA	NA	AMIN002187	NA	1
MZ22500638	NA	AARA012034	NA	AALB000139	2
MZ22500640	NA	NA	NA	AALB009367	1
MZ22500680	NA	AARA005754	AMIN010185	NA	2
MZ22500688	AGAP009239	NA	NA	NA	1
MZ22500690	AGAP001480	NA	NA	NA	1
MZ22500693	NA	AARA003711	NA	NA	1
MZ22500710	AGAP013411	NA	NA	NA	1
MZ22500728	NA	NA	AMIN003728	AALB002404	2
MZ22500736	NA	AARA008352	NA	NA	1
MZ22500746	NA	AARA007729	NA	AALB005803	2
MZ22500757	NA	NA	NA	AALB009919	1
MZ22500767	NA	NA	NA	AALB003821	1
MZ22500769	NA	NA	AMIN004277	NA	1
MZ22500775	NA	NA	NA	AALB005170	1
MZ22500784	NA	NA	NA	AALB001300	1
MZ22500790	NA	NA	AMIN010217	NA	1
MZ22500794	NA	NA	NA	AALB009378	1
MZ22500806	NA	NA	NA	AALB000780	1
MZ22500822	NA	NA	AMIN006262	NA	1
MZ22500834	NA	NA	NA	AALB008103	1
MZ22500848	NA	AARA001294	NA	NA	1
MZ22500854	NA	NA	NA	AALB009215	1
MZ22500859	NA	NA	NA	AALB009283	1
MZ22500880	NA	NA	NA	AALB002837	1
MZ22500885	NA	NA	NA	AALB005997	1
MZ22500892	NA	NA	NA	AALB003876	1
MZ22500907	NA	NA	NA	AALB002135	1
MZ22500919	AGAP010987	NA	NA	NA	1
MZ22500956	NA	AARA000873	NA	NA	1
MZ22500957	NA	NA	AMIN008141	NA	1
MZ22500978	NA	AARA004991	AMIN006139	NA	2
MZ22501038	NA	AARA003865	NA	AALB000373	2
MZ22501040	NA	NA	NA	AALB005122	1
MZ22501044	NA	NA	NA	AALB009205	1
MZ22501068	NA	AARA007441	NA	NA	1
MZ22501072	NA	NA	NA	AALB010782	1
MZ22501074	NA	NA	NA	AALB004825	1
MZ22501090	NA	NA	NA	AALB002744	1
MZ22501154	NA	NA	NA	AALB004726	1
MZ22501160	NA	NA	NA	AALB006614	1
MZ22501207	NA	NA	NA	AALB000947	1
MZ22501238	NA	NA	NA	AALB003225	1
MZ22501248	AGAP002644	NA	NA	NA	1
MZ22501266	NA	NA	NA	AALB004017	1
MZ22501276	AGAP001427	NA	NA	NA	1
MZ22501295	NA	NA	NA	AALB009127	1
MZ22501314	NA	NA	NA	AALB007202	1
MZ22501393	NA	NA	NA	AALB000996	1
MZ22501445	NA	NA	AMIN001795	AALB000432	2
MZ22501464	NA	NA	AMIN004677	NA	1
MZ22501520	NA	AARA007947	NA	NA	1
MZ22501521	NA	NA	NA	AALB008934	1
MZ22501561	NA	NA	NA	AALB005537	1
MZ22501611	NA	AARA008185	NA	AALB005404	2
MZ22501631	NA	NA	AMIN005191	AALB006893	2
MZ22501648	NA	NA	NA	AALB004397	1
MZ22501661	NA	NA	AMIN007657	NA	1
MZ22501662	NA	NA	NA	AALB005651	1
MZ22501669	NA	NA	NA	AALB008761	1
MZ22501670	NA	NA	AMIN011039	NA	1
MZ22501674	NA	NA	AMIN009139	AALB000060	2
MZ22501686	NA	NA	AMIN004565	NA	1
MZ22501692	AGAP000926	NA	NA	NA	1
MZ22501716	NA	NA	AMIN002753	NA	1
MZ22501728	NA	NA	NA	AALB002776	1
MZ22501730	NA	NA	AMIN010400	NA	1
MZ22501734	AGAP007106	AARA007768	NA	NA	2
MZ22501765	NA	NA	AMIN010358	NA	1
MZ22501789	NA	NA	AMIN008111	NA	1
MZ22501809	NA	NA	AMIN008000	AALB004145	2
MZ22501852	NA	NA	AMIN007445	NA	1
MZ22501873	NA	NA	AMIN010413	NA	1
MZ22501889	NA	NA	AMIN009693	NA	1
MZ22501894	NA	AARA002591	NA	NA	1
MZ22501951	NA	NA	NA	AALB007574	1
MZ22501966	NA	NA	NA	AALB003365	1
MZ22502029	NA	NA	AMIN011137	NA	1
MZ22502049	NA	NA	NA	AALB000982	1
MZ22502113	NA	NA	NA	AALB002986	1
MZ22502115	NA	NA	NA	AALB004606	1
MZ22502118	NA	NA	NA	AALB010115	1
MZ22502172	NA	NA	AMIN000349	AALB008869	2
MZ22502175	NA	NA	AMIN008338	NA	1
MZ22502179	NA	NA	AMIN006414	NA	1
MZ22502218	NA	NA	AMIN007232	AALB007905	2
MZ22502251	AGAP004194	NA	NA	NA	1
MZ22502255	NA	NA	AMIN009105	NA	1
MZ22502260	NA	NA	NA	AALB001428	1
MZ22502291	NA	AARA002816	NA	AALB007112	2
MZ22502306	NA	AARA010961	NA	NA	1
MZ22502307	NA	NA	NA	AALB005723	1
MZ22502328	NA	NA	AMIN000495	NA	1
MZ22502329	NA	NA	NA	AALB001536	1
MZ22502344	NA	NA	AMIN004044	NA	1
MZ22502383	NA	NA	NA	AALB003683	1
MZ22502421	NA	NA	AMIN000322	NA	1
MZ22502437	NA	NA	AMIN008647	NA	1
MZ22502451	NA	NA	NA	AALB000601	1
MZ22502510	NA	NA	NA	AALB006212	1
MZ22502523	NA	NA	NA	AALB008731	1
MZ22502535	AGAP006939	NA	NA	AALB004965	2
MZ22502551	NA	NA	NA	AALB004150	1
MZ22502573	AGAP010638	NA	NA	NA	1
MZ22502581	NA	NA	AMIN011291	NA	1
MZ22502585	NA	NA	AMIN009938	NA	1
MZ22502605	NA	NA	AMIN003554	NA	1
MZ22502640	NA	AARA000391	NA	NA	1
MZ22502650	AGAP002434	NA	AMIN002701	AALB002943	3
MZ22502683	NA	NA	NA	AALB000191	1
MZ22502711	NA	NA	AMIN008356	NA	1
MZ22502733	NA	NA	NA	AALB008773	1
MZ22502737	NA	AARA004673	AMIN003224	AALB008986	3
MZ22502759	NA	AARA004528	NA	NA	1
MZ22502803	NA	NA	AMIN001901	NA	1
MZ22502814	NA	AARA001591	AMIN002351	NA	2
MZ22502823	NA	NA	AMIN000785	NA	1
MZ22502825	NA	NA	AMIN008781	NA	1
MZ22502869	NA	NA	NA	AALB007524	1
MZ22502892	NA	NA	NA	AALB003695	1
MZ22502900	NA	NA	AMIN008113	NA	1
MZ22502947	NA	AARA006918	NA	NA	1
MZ22502949	NA	AARA007970	NA	NA	1
MZ22502961	NA	NA	NA	AALB008952	1
MZ22502962	NA	NA	AMIN000953	NA	1
MZ22502972	NA	NA	AMIN007907	NA	1
MZ22502979	NA	NA	AMIN003118	AALB002247	2
MZ22502980	AGAP007163	NA	NA	NA	1
MZ22502998	NA	NA	NA	AALB003682	1
MZ22503007	NA	AARA007677	AMIN011173	AALB005990	3
MZ22503011	NA	NA	AMIN004097	AALB008081	2
MZ22503037	NA	NA	NA	AALB009253	1
MZ22503048	AGAP004732	NA	NA	NA	1
MZ22503095	NA	NA	AMIN004980	NA	1
MZ22503107	NA	NA	NA	AALB007270	1
MZ22503119	NA	NA	AMIN010835	NA	1
MZ22503124	AGAP007732	NA	NA	NA	1
MZ22503126	NA	NA	AMIN002676	NA	1
MZ22503127	NA	NA	AMIN010398	NA	1
MZ22503134	NA	NA	NA	AALB008123	1
MZ22503190	AGAP013764	NA	NA	NA	1
MZ22503203	AGAP002711	AARA004136	NA	NA	2
MZ22503208	NA	NA	NA	AALB006788	1
MZ22503225	NA	NA	AMIN001970	NA	1
MZ22503226	NA	NA	AMIN008743	AALB010063	2
MZ22503236	NA	NA	NA	AALB004920	1
MZ22503240	NA	NA	NA	AALB002940	1
MZ22503266	NA	NA	AMIN002395	NA	1
MZ22503271	NA	NA	NA	AALB008677	1
MZ22503281	NA	NA	NA	AALB010340	1
MZ22503295	NA	NA	NA	AALB007999	1
MZ22503354	NA	NA	AMIN002806	NA	1
MZ22503368	NA	NA	AMIN005947	NA	1
MZ22503370	NA	NA	NA	AALB002745	1
MZ22503376	AGAP009496	AARA011884	AMIN001870	NA	3
MZ22503384	NA	NA	NA	AALB005434	1
MZ22503387	NA	AARA001065	NA	NA	1
MZ22503388	AGAP003687	NA	NA	AALB010877	2
MZ22503389	NA	NA	NA	AALB003072	1
MZ22503395	NA	AARA000646	NA	NA	1
MZ22503430	NA	NA	NA	AALB004490	1
MZ22503452	AGAP004288	NA	AMIN003009	NA	2
MZ22503459	NA	AARA009372	NA	NA	1
MZ22503461	NA	NA	NA	AALB001001	1
MZ22503531	NA	NA	AMIN009719	NA	1
MZ22503546	NA	NA	AMIN000938	NA	1
MZ22503563	NA	NA	AMIN009619	NA	1
MZ22503574	AGAP012064	NA	AMIN008239	AALB010141	3
MZ22503579	NA	NA	AMIN010460	NA	1
MZ22503614	NA	NA	NA	AALB007447	1
MZ22503618	NA	NA	AMIN002321	NA	1
MZ22503628	NA	NA	NA	AALB003753	1
MZ22503648	NA	NA	AMIN004564	NA	1
MZ22503653	AGAP004812	NA	NA	AALB004579	2
MZ22503670	NA	NA	NA	AALB007659	1
MZ22503690	AGAP009189	NA	NA	NA	1
MZ22503710	NA	NA	AMIN008077	NA	1
MZ22503712	NA	NA	NA	AALB000163	1
MZ22503720	NA	NA	NA	AALB002850	1
MZ22503741	NA	NA	NA	AALB004742	1
MZ22503748	NA	NA	NA	AALB007652	1
MZ22503751	NA	NA	AMIN001973	NA	1
MZ22503775	AGAP007333	NA	NA	NA	1
MZ22503778	NA	AARA005315	NA	NA	1
MZ22503799	NA	NA	AMIN003495	NA	1
MZ22503825	NA	NA	AMIN008436	NA	1
MZ22503832	NA	NA	NA	AALB003967	1
MZ22503842	NA	NA	NA	AALB007152	1
MZ22503850	NA	NA	AMIN010452	AALB005116	2
MZ22503852	NA	NA	NA	AALB009493	1
MZ22503867	AGAP013214	NA	NA	NA	1
MZ22503885	NA	AARA000513	NA	NA	1
MZ22503900	NA	NA	AMIN002429	NA	1
MZ22503901	NA	NA	NA	AALB000500	1
MZ22503915	NA	NA	NA	AALB009653	1
MZ22503920	NA	NA	NA	AALB007122	1
MZ22503940	NA	AARA006402	NA	NA	1
MZ22503946	NA	NA	NA	AALB004866	1
MZ22503962	NA	NA	NA	AALB007007	1
MZ22503970	NA	AARA006850	NA	NA	1
MZ22504001	NA	NA	NA	AALB004546	1
MZ22504014	NA	NA	AMIN009940	NA	1
MZ22504022	NA	NA	NA	AALB006834	1
MZ22504061	NA	NA	NA	AALB009683	1
MZ22504062	NA	NA	NA	AALB004090	1
MZ22504081	NA	NA	NA	AALB003495	1
MZ22504084	NA	NA	NA	AALB003641	1
MZ22504101	NA	NA	NA	AALB002398	1
MZ22504147	NA	NA	NA	AALB008121	1
MZ22504148	NA	NA	NA	AALB000716	1
MZ22504174	AGAP007642	NA	AMIN010283	AALB006248	3
MZ22504180	NA	AARA002182	NA	AALB008586	2
MZ22504182	NA	NA	AMIN003356	NA	1
MZ22504183	NA	NA	AMIN001620	NA	1
MZ22504191	NA	NA	NA	AALB005888	1
MZ22504203	NA	NA	NA	AALB006092	1
MZ22504221	NA	AARA005660	AMIN011063	NA	2
MZ22504240	NA	NA	NA	AALB000633	1
MZ22504253	NA	NA	AMIN010927	NA	1
MZ22504257	NA	NA	NA	AALB008196	1
MZ22504267	NA	NA	AMIN009349	NA	1
MZ22504325	NA	NA	NA	AALB008888	1
MZ22504346	AGAP010267	NA	NA	NA	1
MZ22504356	AGAP003818	NA	NA	NA	1
MZ22504372	NA	NA	AMIN005192	NA	1
MZ22504386	NA	NA	AMIN001727	AALB001458	2
MZ22504391	NA	AARA001635	NA	NA	1
MZ22504414	NA	NA	NA	AALB002872	1
MZ22504426	NA	NA	NA	AALB007551	1
MZ22504430	NA	NA	NA	AALB000511	1
MZ22504460	NA	AARA010593	NA	AALB006581	2
MZ22504464	AGAP008105	NA	NA	NA	1
MZ22504501	NA	NA	AMIN000441	NA	1
MZ22504537	AGAP005803	NA	AMIN011145	NA	2
MZ22504565	NA	NA	AMIN003311	NA	1
MZ22504568	NA	NA	NA	AALB007514	1
MZ22504630	NA	AARA008089	NA	AALB005167	2
MZ22504648	NA	NA	AMIN008854	NA	1
MZ22504683	NA	NA	AMIN009509	NA	1
MZ22504693	NA	NA	NA	AALB003602	1
MZ22504707	NA	NA	AMIN008792	NA	1
MZ22504710	NA	AARA007822	AMIN010650	NA	2
MZ22504772	NA	NA	NA	AALB006827	1
MZ22504775	AGAP001315	AARA001779	NA	NA	2
MZ22504776	NA	NA	NA	AALB008880	1
MZ22504796	NA	NA	AMIN002659	NA	1
MZ22504806	NA	NA	AMIN008908	NA	1
MZ22504839	NA	NA	AMIN005890	NA	1
MZ22504845	NA	NA	AMIN005615	AALB006480	2
MZ22504876	AGAP008801	NA	NA	NA	1
MZ22504884	NA	NA	NA	AALB005542	1
MZ22504922	NA	NA	AMIN011587	AALB004332	2
MZ22504938	NA	NA	NA	AALB003489	1
MZ22504942	AGAP003280	NA	NA	NA	1
MZ22504944	NA	NA	AMIN004286	NA	1
MZ22504980	NA	NA	NA	AALB000972	1
MZ22504984	AGAP008896	NA	AMIN001666	AALB001829	3
MZ22504991	NA	NA	NA	AALB006049	1
MZ22505012	NA	NA	NA	AALB006308	1
MZ22505030	AGAP010767	NA	NA	NA	1
MZ22505111	NA	NA	AMIN001845	NA	1
MZ22505135	NA	NA	NA	AALB007190	1
MZ22505146	NA	AARA001767	NA	NA	1
MZ22505157	AGAP002054	NA	NA	NA	1
MZ22505158	NA	NA	AMIN010479	NA	1
MZ22505179	NA	NA	NA	AALB000845	1
MZ22505198	NA	NA	NA	AALB005731	1
MZ22505229	NA	AARA002904	NA	AALB010652	2
MZ22505265	AGAP005200	NA	NA	NA	1
MZ22505297	NA	NA	AMIN008312	NA	1
MZ22505302	NA	NA	NA	AALB004720	1
MZ22505308	NA	NA	NA	AALB007526	1
MZ22505326	NA	NA	AMIN004795	NA	1
MZ22505327	NA	NA	NA	AALB005188	1
MZ22505334	NA	NA	NA	AALB000161	1
MZ22505339	NA	NA	NA	AALB004958	1
MZ22505354	NA	NA	AMIN011284	NA	1
MZ22505366	NA	AARA000379	NA	NA	1
MZ22505385	AGAP010139	NA	NA	NA	1
MZ22505396	NA	AARA003860	NA	NA	1
MZ22505411	NA	NA	AMIN003558	NA	1
MZ22505421	NA	NA	AMIN011001	AALB004133	2
MZ22505429	NA	NA	NA	AALB004400	1
MZ22505441	NA	NA	NA	AALB000983	1
MZ22505457	NA	NA	NA	AALB008295	1
MZ22505458	NA	NA	AMIN007490	NA	1
MZ22505482	NA	AARA002151	AMIN003510	AALB002441	3
MZ22505504	NA	AARA003317	NA	NA	1
MZ22505541	AGAP003409	AARA001488	AMIN003868	AALB003386	4
MZ22505596	NA	NA	AMIN006518	NA	1
MZ22505598	NA	NA	NA	AALB010299	1
MZ22505625	NA	NA	NA	AALB009528	1
MZ22505629	NA	NA	AMIN002805	NA	1
MZ22505637	AGAP003839	NA	NA	AALB002562	2
MZ22505645	NA	NA	AMIN004958	NA	1
MZ22505670	NA	NA	NA	AALB005355	1
MZ22505675	NA	AARA007883	AMIN010599	AALB005528	3
MZ22505678	NA	NA	AMIN009553	NA	1
MZ22505732	NA	AARA011552	NA	NA	1
MZ22505739	NA	NA	NA	AALB002657	1
MZ22505777	NA	NA	AMIN002354	AALB009299	2
MZ22505846	NA	NA	AMIN010952	AALB005773	2
MZ22505854	NA	NA	AMIN007746	NA	1
MZ22505868	NA	AARA007048	NA	NA	1
MZ22505873	AGAP005634	NA	NA	NA	1
MZ22505892	NA	NA	NA	AALB010434	1
MZ22505904	AGAP011070	NA	NA	NA	1
MZ22505912	NA	AARA004962	NA	NA	1
MZ22505935	NA	AARA002993	NA	NA	1
MZ22505953	AGAP008044	AARA005084	AMIN006227	NA	3
MZ22506024	NA	NA	AMIN001321	NA	1
MZ22506043	NA	AARA007991	NA	NA	1
MZ22506071	NA	NA	NA	AALB001150	1
MZ22506089	NA	NA	NA	AALB005776	1
MZ22506091	NA	NA	NA	AALB003858	1
MZ22506121	NA	NA	AMIN002070	NA	1
MZ22506145	NA	AARA004435	AMIN002703	NA	2
MZ22506151	AGAP004443	NA	NA	AALB003170	2
MZ22506158	NA	AARA007963	NA	NA	1
MZ22506164	NA	NA	NA	AALB005388	1
MZ22506170	NA	AARA008841	NA	AALB010644	2
MZ22506190	NA	NA	AMIN005468	NA	1
MZ22506196	NA	NA	AMIN008926	NA	1
MZ22506200	NA	NA	AMIN005995	NA	1
MZ22506206	NA	AARA010899	NA	NA	1
MZ22506226	NA	NA	AMIN002838	NA	1
MZ22506438	NA	NA	AMIN010985	NA	1
MZ22506450	NA	AARA007005	NA	NA	1
MZ22506463	NA	NA	NA	AALB002840	1
MZ22506526	NA	NA	AMIN010921	NA	1
MZ22506528	NA	NA	NA	AALB001080	1
MZ22506531	AGAP002400	NA	NA	NA	1
MZ22506577	NA	AARA007164	AMIN001156	NA	2
MZ22506585	AGAP005635	NA	NA	NA	1
MZ22506599	NA	NA	AMIN004051	AALB009630	2
MZ22506626	NA	NA	NA	AALB006967	1
MZ22506640	AGAP008100	NA	AMIN006172	NA	2
MZ22506650	NA	NA	AMIN002647	NA	1
MZ22506676	NA	NA	NA	AALB009887	1
MZ22506717	NA	NA	NA	AALB000737	1
MZ22506724	NA	NA	AMIN006645	NA	1
MZ22506733	NA	NA	AMIN006767	AALB000580	2
MZ22506735	NA	AARA004627	NA	NA	1
MZ22506753	NA	NA	AMIN008852	NA	1
MZ22506856	NA	NA	AMIN004100	NA	1
MZ22506868	NA	NA	AMIN009194	NA	1
MZ22506893	NA	NA	AMIN006679	NA	1
MZ22506931	NA	AARA009600	NA	NA	1
MZ22506950	AGAP012521	NA	NA	NA	1
MZ22506969	NA	AARA010488	NA	NA	1
MZ22506986	NA	AARA000842	NA	NA	1
MZ22506987	NA	NA	NA	AALB000520	1
MZ22506998	NA	AARA006818	NA	NA	1
MZ22507017	NA	AARA006851	NA	NA	1
MZ22507059	NA	NA	AMIN001029	NA	1
MZ22507067	NA	NA	AMIN003237	AALB008294	2
MZ22507074	NA	NA	AMIN008512	NA	1
MZ22507091	NA	NA	NA	AALB002731	1
MZ22507100	NA	NA	AMIN008687	NA	1
MZ22507115	AGAP007525	AARA008094	AMIN010402	NA	3
MZ22507123	NA	NA	NA	AALB008874	1
MZ22507169	NA	NA	NA	AALB000594	1
MZ22507211	AGAP002515	NA	NA	NA	1
MZ22507218	NA	NA	NA	AALB001330	1
MZ22507221	NA	NA	AMIN005002	NA	1
MZ22507224	NA	NA	AMIN002558	NA	1
MZ22507244	NA	AARA007583	AMIN010992	NA	2
MZ22507254	NA	NA	AMIN008510	AALB009895	2
MZ22507280	AGAP005860	NA	NA	NA	1
MZ22507282	AGAP002194	AARA006740	AMIN003068	NA	3
MZ22507285	NA	NA	AMIN007336	NA	1
MZ22507309	NA	AARA010326	NA	AALB006840	2
MZ22507330	NA	AARA001260	NA	AALB009064	2
MZ22507345	NA	NA	NA	AALB001603	1
MZ22507346	AGAP004392	NA	NA	NA	1
MZ22507358	NA	NA	NA	AALB006966	1
MZ22507366	NA	NA	NA	AALB007639	1
MZ22507391	NA	NA	NA	AALB004915	1
MZ22507396	NA	NA	AMIN001161	NA	1
MZ22507508	NA	NA	NA	AALB010478	1
MZ22507514	NA	NA	AMIN007550	AALB004614	2
MZ22507582	NA	NA	NA	AALB003549	1
MZ22507666	AGAP007921	NA	NA	NA	1
MZ22507744	NA	NA	AMIN005626	NA	1
MZ22507747	NA	NA	NA	AALB006283	1
MZ22507791	NA	NA	AMIN005203	NA	1
MZ22507799	NA	NA	NA	AALB009751	1
MZ22507822	NA	NA	AMIN003175	NA	1
MZ22507843	NA	NA	AMIN006141	NA	1
MZ22507855	NA	AARA005663	AMIN011061	NA	2
MZ22507869	NA	NA	AMIN009728	NA	1
MZ22507876	NA	NA	AMIN004924	NA	1
MZ22507893	AGAP003184	NA	NA	AALB003116	2
MZ22507906	NA	NA	NA	AALB001773	1
MZ22507939	NA	NA	AMIN000344	AALB008080	2
MZ22507940	NA	NA	NA	AALB004769	1
MZ22507942	NA	NA	NA	AALB002388	1
MZ22507953	NA	NA	AMIN010682	NA	1
MZ22507961	NA	NA	NA	AALB008161	1
MZ22507970	NA	NA	NA	AALB006912	1
MZ22507989	NA	NA	AMIN003110	NA	1
MZ22508018	NA	NA	AMIN002353	NA	1
MZ22508074	NA	NA	AMIN005330	NA	1
MZ22508124	NA	NA	NA	AALB002846	1
MZ22508182	NA	NA	NA	AALB010029	1
MZ22508188	NA	NA	NA	AALB006971	1
MZ22508197	NA	NA	AMIN003244	NA	1
MZ22508246	NA	NA	NA	AALB007151	1
MZ22508252	AGAP012960	NA	NA	NA	1
MZ22508253	AGAP007596	NA	AMIN010212	AALB006199	3
MZ22508255	NA	NA	AMIN000523	NA	1
MZ22508305	NA	NA	NA	AALB000017	1
MZ22508343	NA	NA	AMIN000700	AALB003074	2
MZ22508364	NA	AARA004939	NA	NA	1
MZ22508395	NA	NA	AMIN002644	NA	1
MZ22508432	NA	AARA005302	NA	AALB003600	2
MZ22508455	NA	NA	NA	AALB006335	1
MZ22508478	NA	AARA007605	NA	NA	1
MZ22508562	NA	NA	NA	AALB007063	1
MZ22508577	NA	NA	NA	AALB010135	1
MZ22508580	NA	NA	AMIN001622	NA	1
MZ22508599	NA	NA	AMIN000256	NA	1
MZ22508600	NA	NA	NA	AALB001964	1
MZ22508615	NA	NA	AMIN008021	NA	1
MZ22508633	NA	AARA000882	NA	NA	1
MZ22508693	NA	NA	AMIN004819	NA	1
MZ22508697	NA	NA	AMIN006619	NA	1
MZ22508734	NA	NA	NA	AALB009608	1
MZ22508753	NA	NA	NA	AALB003027	1
MZ22508771	NA	NA	NA	AALB000257	1
MZ22508832	NA	NA	AMIN004436	AALB010116	2
MZ22508835	AGAP009893	NA	NA	AALB001138	2
MZ22508858	NA	AARA001550	NA	NA	1
MZ22508867	AGAP004151	NA	NA	NA	1
MZ22508881	NA	NA	NA	AALB004508	1
MZ22508888	AGAP005556	NA	AMIN010873	NA	2
MZ22508903	NA	NA	AMIN005886	AALB007977	2
MZ22508907	NA	NA	AMIN011459	NA	1
MZ22508928	NA	AARA009373	NA	NA	1
MZ22508948	NA	NA	NA	AALB001494	1
MZ22509012	NA	AARA003056	AMIN007286	AALB005880	3
MZ22509077	NA	NA	AMIN009956	AALB005041	2
MZ22509079	NA	AARA007482	NA	NA	1
MZ22509153	NA	NA	AMIN007738	NA	1
MZ22509167	NA	NA	AMIN005769	AALB006374	2
MZ22509169	AGAP011324	NA	AMIN009163	NA	2
MZ22509194	NA	NA	NA	AALB002100	1
MZ22509202	NA	NA	NA	AALB004321	1
MZ22509216	NA	NA	AMIN011644	NA	1
MZ22509274	NA	NA	AMIN003704	NA	1
MZ22509417	NA	NA	AMIN009780	AALB001738	2
MZ22509423	NA	AARA001289	NA	NA	1
MZ22509441	AGAP002900	NA	NA	NA	1
MZ22509451	NA	NA	NA	AALB003499	1
MZ22509466	NA	NA	NA	AALB003520	1
MZ22509473	NA	NA	NA	AALB002681	1
MZ22509483	NA	NA	AMIN010214	NA	1
MZ22509497	AGAP010171	NA	NA	NA	1
MZ22509506	NA	AARA007872	NA	NA	1
MZ22509514	NA	NA	NA	AALB005967	1
MZ22509515	NA	NA	AMIN002202	NA	1
MZ22509545	NA	NA	AMIN010749	NA	1
MZ22509605	NA	NA	AMIN010482	NA	1
MZ22509612	NA	NA	NA	AALB008904	1
MZ22509632	NA	NA	AMIN003772	NA	1
MZ22509633	NA	AARA001504	AMIN003853	AALB002849	3
MZ22509650	NA	NA	AMIN010415	NA	1
MZ22509652	NA	AARA011987	NA	NA	1
MZ22509702	NA	NA	AMIN011485	AALB007343	2
MZ22509706	NA	NA	NA	AALB010821	1
MZ22509719	NA	NA	AMIN002645	NA	1
MZ22509831	NA	NA	AMIN007828	NA	1
MZ22509864	NA	NA	AMIN002728	AALB009713	2
MZ22509905	NA	NA	NA	AALB008074	1
MZ22509907	NA	NA	AMIN006398	NA	1
MZ22510017	NA	NA	AMIN005380	NA	1
MZ22510026	NA	AARA001128	NA	NA	1
MZ22510027	NA	NA	AMIN010183	AALB006126	2
MZ22510054	NA	NA	NA	AALB004251	1
MZ22510088	AGAP004448	NA	NA	NA	1
MZ22510123	NA	NA	NA	AALB007920	1
MZ22510133	NA	NA	NA	AALB004754	1
MZ22510148	NA	AARA009463	AMIN001681	AALB000263	3
MZ22510181	NA	NA	AMIN010497	NA	1
MZ22510268	AGAP004502	NA	NA	NA	1
MZ22510271	NA	NA	AMIN001297	AALB010226	2
MZ22510347	AGAP013481	NA	NA	NA	1
MZ22510354	NA	NA	NA	AALB005417	1
MZ22510379	NA	NA	AMIN004889	NA	1
MZ22510392	NA	NA	NA	AALB006182	1
MZ22510397	NA	NA	NA	AALB001141	1
MZ22510398	NA	NA	NA	AALB003820	1
MZ22510451	AGAP007633	NA	NA	NA	1
MZ22510453	AGAP009545	NA	NA	NA	1
MZ22510457	NA	NA	AMIN000559	NA	1
MZ22510542	NA	AARA000731	NA	NA	1
MZ22510556	AGAP002436	NA	AMIN002702	AALB002944	3
MZ22510617	NA	NA	NA	AALB010573	1
MZ22510635	NA	NA	NA	AALB001033	1
MZ22510668	NA	NA	AMIN002910	NA	1
MZ22510684	AGAP007831	NA	NA	NA	1
MZ22510732	NA	NA	AMIN001006	AALB000402	2
MZ22510743	NA	AARA002404	NA	NA	1
MZ22510765	NA	NA	AMIN002456	AALB008754	2
MZ22510794	NA	NA	AMIN011554	NA	1
MZ22510812	NA	NA	AMIN007777	NA	1
MZ22510827	NA	AARA010777	AMIN007197	NA	2
MZ22510828	NA	NA	NA	AALB000095	1
MZ22510885	NA	NA	AMIN004119	NA	1
MZ22510902	NA	NA	NA	AALB003966	1
MZ22510906	NA	NA	NA	AALB007470	1
MZ22510917	NA	NA	AMIN011144	NA	1
MZ22510933	NA	NA	AMIN003177	NA	1
MZ22510961	NA	NA	NA	AALB000488	1
MZ22510968	NA	NA	NA	AALB010324	1
MZ22510973	NA	NA	AMIN001833	NA	1
MZ22510991	NA	NA	AMIN002411	AALB009156	2
MZ22511024	NA	NA	NA	AALB006603	1
MZ22511025	NA	NA	NA	AALB003470	1
MZ22511109	NA	NA	NA	AALB001503	1
MZ22511127	NA	AARA005690	NA	AALB004643	2
MZ22511238	NA	NA	AMIN008745	NA	1
MZ22511251	NA	NA	AMIN006455	AALB007528	2
MZ22511317	NA	NA	NA	AALB005870	1
MZ22511334	NA	AARA005558	NA	NA	1
MZ22511335	NA	NA	NA	AALB000421	1
MZ22511344	AGAP003990	NA	NA	NA	1
MZ22511362	NA	NA	NA	AALB008403	1
MZ22511403	NA	NA	AMIN001941	NA	1
MZ22511406	NA	AARA011881	NA	NA	1
MZ22511420	NA	NA	AMIN007592	NA	1
MZ22511430	NA	NA	AMIN010740	NA	1
MZ22511442	NA	NA	NA	AALB004415	1
MZ22511468	AGAP007411	NA	NA	NA	1
MZ22511510	AGAP009224	NA	NA	AALB000150	2
MZ22511517	AGAP004756	AARA006010	NA	NA	2
MZ22511536	NA	NA	AMIN004437	NA	1
MZ22511564	NA	NA	NA	AALB009096	1
MZ22511573	NA	NA	NA	AALB007060	1
MZ22511601	NA	AARA004190	NA	NA	1
MZ22511762	AGAP005079	NA	NA	NA	1
MZ22511843	NA	NA	AMIN011304	NA	1
MZ22511862	NA	NA	AMIN003309	NA	1
MZ22511941	NA	NA	NA	AALB004322	1
MZ22511950	NA	NA	AMIN004791	AALB003479	2
MZ22511954	NA	NA	AMIN002994	NA	1
MZ22511969	NA	NA	AMIN003199	AALB003052	2
MZ22511985	NA	NA	NA	AALB005121	1
MZ22512001	NA	AARA001505	AMIN003852	AALB002848	3
MZ22512008	NA	AARA000748	NA	NA	1
MZ22512028	NA	NA	NA	AALB000803	1
MZ22512030	NA	AARA002275	NA	NA	1
MZ22512065	AGAP011713	NA	NA	NA	1
MZ22512110	NA	NA	AMIN003302	NA	1
MZ22512151	NA	AARA009523	NA	NA	1
MZ22512153	NA	AARA007913	NA	NA	1
MZ22512176	AGAP010044	NA	AMIN006684	NA	2
MZ22512183	NA	NA	NA	AALB001751	1
MZ22512204	NA	NA	AMIN000735	NA	1
MZ22512206	NA	NA	AMIN001244	NA	1
MZ22512227	AGAP008498	NA	NA	NA	1
MZ22512284	NA	NA	AMIN000225	NA	1
MZ22512297	NA	NA	AMIN004749	NA	1
MZ22512320	NA	NA	NA	AALB006342	1
MZ22512361	NA	NA	NA	AALB000918	1
MZ22512367	NA	NA	AMIN011169	AALB005746	2
MZ22512381	NA	NA	NA	AALB009191	1
MZ22512433	NA	AARA006814	NA	NA	1
MZ22512462	AGAP002095	NA	NA	NA	1
MZ22512478	NA	AARA000328	NA	AALB001040	2
MZ22512500	NA	NA	NA	AALB005877	1
MZ22512555	NA	NA	NA	AALB002652	1
MZ22512610	AGAP002413	AARA004463	NA	AALB002268	3
MZ22512627	AGAP002192	AARA006747	NA	NA	2
MZ22512656	NA	NA	NA	AALB005667	1
MZ22512714	NA	NA	NA	AALB006068	1
MZ22512741	NA	NA	AMIN004887	NA	1
MZ22512742	NA	AARA001951	NA	NA	1
MZ22512743	NA	NA	NA	AALB008424	1
MZ22512751	NA	AARA003093	NA	NA	1
MZ22512763	NA	AARA007610	NA	NA	1
MZ22512801	NA	NA	AMIN011350	NA	1
MZ22512830	NA	NA	AMIN000873	NA	1
MZ22512853	NA	AARA006921	NA	NA	1
MZ22512863	NA	NA	AMIN006265	NA	1
MZ22512890	NA	NA	AMIN001222	NA	1
MZ22512910	NA	NA	NA	AALB008022	1
MZ22512943	NA	NA	AMIN003522	NA	1
MZ22512944	NA	NA	AMIN011556	NA	1
MZ22512947	NA	NA	NA	AALB009886	1
MZ22512978	NA	NA	AMIN001292	NA	1
MZ22513014	NA	NA	NA	AALB008160	1
MZ22513055	AGAP012029	AARA000822	NA	AALB009769	3
MZ22513089	NA	NA	AMIN014793	NA	1
MZ22513102	NA	NA	NA	AALB002671	1
MZ22513152	AGAP007828	NA	NA	NA	1
MZ22513168	NA	NA	AMIN002905	NA	1
MZ22513169	NA	AARA000789	AMIN004429	NA	2
MZ22513189	AGAP003893	NA	NA	NA	1
MZ22513243	AGAP002564	NA	NA	AALB008227	2
MZ22513324	NA	NA	AMIN003759	NA	1
MZ22513353	AGAP004820	NA	NA	NA	1
MZ22513354	AGAP007766	NA	NA	NA	1
MZ22513400	NA	NA	AMIN011433	NA	1
MZ22513447	AGAP008476	AARA011097	AMIN009816	NA	3
MZ22513457	AGAP003852	AARA009944	NA	NA	2
MZ22513480	NA	NA	AMIN006350	NA	1
MZ22513543	NA	NA	AMIN008172	AALB004748	2
MZ22513551	NA	NA	NA	AALB009531	1
MZ22513564	NA	NA	AMIN002948	NA	1
MZ22513566	NA	NA	AMIN007542	NA	1
MZ22513572	NA	AARA006078	AMIN008176	AALB004744	3
MZ22513580	NA	NA	NA	AALB005785	1
MZ22513619	NA	NA	NA	AALB006331	1
MZ22513624	NA	AARA000496	NA	NA	1
MZ22513634	AGAP001677	NA	NA	NA	1
MZ22513637	NA	NA	NA	AALB008076	1
MZ22513644	AGAP005920	NA	NA	NA	1
MZ22513674	NA	NA	NA	AALB001394	1
MZ22513696	NA	NA	NA	AALB010567	1
MZ22513706	NA	NA	AMIN010981	NA	1
MZ22513709	AGAP013250	NA	NA	NA	1
MZ22513827	NA	NA	AMIN001474	NA	1
MZ22513867	NA	NA	AMIN002685	NA	1
MZ22513876	NA	NA	NA	AALB004241	1
MZ22513883	NA	NA	NA	AALB002485	1
MZ22513903	NA	NA	AMIN010910	NA	1
MZ22513945	NA	AARA003321	NA	NA	1
MZ22513993	NA	NA	AMIN003013	NA	1
MZ22514007	NA	NA	NA	AALB005264	1
MZ22514043	NA	NA	NA	AALB009491	1
MZ22514053	NA	NA	AMIN009960	AALB005044	2
MZ22514054	NA	NA	NA	AALB007831	1
MZ22514128	NA	NA	AMIN005414	NA	1
MZ22514129	NA	AARA000292	AMIN001741	NA	2
MZ22514136	NA	AARA001953	NA	NA	1
MZ22514148	NA	NA	NA	AALB008167	1
MZ22514169	NA	NA	NA	AALB007215	1
MZ22514217	NA	AARA005078	NA	NA	1
MZ22514226	NA	NA	AMIN010216	NA	1
MZ22514227	NA	AARA006383	NA	NA	1
MZ22514248	NA	NA	NA	AALB001641	1
MZ22514321	NA	NA	NA	AALB009066	1
MZ22514337	NA	NA	NA	AALB006171	1
MZ22514344	NA	NA	NA	AALB004868	1
MZ22514444	NA	NA	AMIN007517	NA	1
MZ22514491	NA	NA	AMIN003255	NA	1
MZ22514492	NA	NA	AMIN002389	NA	1
MZ22514525	NA	NA	NA	AALB009710	1
MZ22514540	NA	NA	AMIN003331	NA	1
MZ22514582	NA	NA	AMIN009742	NA	1
MZ22514609	NA	NA	AMIN000273	NA	1
MZ22514645	AGAP001797	NA	NA	NA	1
MZ22514648	NA	NA	NA	AALB004297	1
MZ22514659	NA	NA	AMIN008927	NA	1
MZ22514696	NA	AARA010224	AMIN005165	NA	2
MZ22514705	NA	NA	AMIN010461	NA	1
MZ22514723	NA	NA	NA	AALB005283	1
MZ22514724	NA	NA	AMIN010989	NA	1
MZ22514729	NA	NA	NA	AALB000426	1
MZ22514747	NA	NA	AMIN005628	NA	1
MZ22514765	NA	AARA006382	NA	NA	1
MZ22514772	NA	NA	AMIN001514	NA	1
MZ22514789	NA	AARA004955	NA	NA	1
MZ22514807	NA	NA	NA	AALB008020	1
MZ22514826	NA	AARA009427	NA	NA	1
MZ22514855	NA	NA	NA	AALB003138	1
MZ22514897	NA	NA	AMIN006110	NA	1
MZ22514908	NA	AARA003000	NA	NA	1
MZ22514929	NA	NA	AMIN010958	AALB005780	2
MZ22514970	NA	NA	NA	AALB003806	1
MZ22514972	AGAP005156	NA	NA	AALB004882	2
MZ22515002	NA	NA	AMIN001159	NA	1
MZ22515031	NA	NA	AMIN004959	NA	1
MZ22515038	NA	AARA002274	NA	NA	1
MZ22515054	NA	NA	AMIN006581	NA	1
MZ22515071	NA	NA	NA	AALB010002	1
MZ22515075	NA	NA	AMIN000141	NA	1
MZ22515106	NA	NA	AMIN001552	AALB000544	2
MZ22515111	NA	NA	AMIN007740	NA	1
MZ22515124	AGAP005418	AARA002378	AMIN011367	NA	3
MZ22515126	NA	AARA005325	NA	NA	1
MZ22515129	NA	NA	AMIN005272	NA	1
MZ22515184	NA	AARA007042	NA	AALB008833	2
MZ22515191	NA	NA	AMIN005768	AALB006729	2
MZ22515192	NA	NA	NA	AALB006995	1
MZ22515195	AGAP004311	NA	NA	NA	1
MZ22515236	AGAP002315	NA	NA	NA	1
MZ22515249	NA	NA	NA	AALB009022	1
MZ22515271	NA	NA	AMIN009662	NA	1
MZ22515286	NA	NA	AMIN005518	NA	1
MZ22515292	NA	NA	NA	AALB008028	1
MZ22515330	NA	AARA011347	NA	NA	1
MZ22515333	NA	NA	NA	AALB008563	1
MZ22515339	AGAP006448	NA	NA	NA	1
MZ22515371	NA	NA	NA	AALB003482	1
MZ22515386	NA	NA	AMIN009851	AALB000521	2
MZ22515441	NA	NA	NA	AALB008085	1
MZ22515486	AGAP005420	AARA002376	NA	NA	2
MZ22515525	NA	NA	NA	AALB004003	1
MZ22515664	NA	NA	NA	AALB000977	1
MZ22515697	NA	NA	AMIN009193	NA	1
MZ22515756	NA	NA	AMIN008523	NA	1
MZ22515761	NA	NA	AMIN003371	NA	1
MZ22515769	NA	NA	AMIN002860	NA	1
MZ22515777	NA	NA	AMIN011551	NA	1
MZ22515781	NA	NA	AMIN008076	NA	1
MZ22515785	NA	AARA014535	NA	NA	1
MZ22515839	NA	AARA011824	NA	NA	1
MZ22515856	NA	NA	AMIN010747	NA	1
MZ22515864	AGAP011190	NA	NA	NA	1
MZ22515895	NA	NA	AMIN010396	AALB005447	2
MZ22515904	NA	NA	NA	AALB006481	1
MZ22515932	NA	AARA001966	NA	NA	1
MZ22515945	NA	NA	NA	AALB010370	1
MZ22515962	NA	NA	NA	AALB000853	1
MZ22515985	NA	NA	AMIN006165	NA	1
MZ22516028	AGAP013535	AARA006849	NA	NA	2
MZ22516056	NA	NA	NA	AALB003368	1
MZ22516112	NA	NA	NA	AALB003490	1
MZ22516117	NA	NA	NA	AALB009460	1
MZ22516150	NA	NA	AMIN005517	NA	1
MZ22516185	NA	NA	AMIN009697	NA	1
MZ22516198	AGAP000733	NA	NA	NA	1
MZ22516204	NA	AARA006012	NA	NA	1
MZ22516209	NA	NA	AMIN000324	NA	1
MZ22516225	NA	AARA001835	NA	NA	1
MZ22516284	NA	NA	AMIN007929	NA	1
MZ22516319	NA	NA	NA	AALB008560	1
MZ22516335	NA	NA	AMIN008231	NA	1
MZ22516424	NA	AARA002401	NA	AALB004811	2
MZ22516439	NA	NA	NA	AALB009018	1
MZ22516453	NA	NA	AMIN009289	NA	1
MZ22516555	NA	NA	NA	AALB010349	1
MZ22516566	AGAP001372	AARA001827	AMIN000555	AALB003001	4
MZ22516619	AGAP002935	NA	NA	NA	1
MZ22516628	NA	NA	NA	AALB007635	1
MZ22516672	NA	AARA010041	NA	NA	1
MZ22516689	NA	NA	AMIN008715	NA	1
MZ22516734	NA	NA	NA	AALB009182	1
MZ22516875	NA	NA	AMIN006617	NA	1
MZ22516930	NA	NA	AMIN004495	NA	1
MZ22516949	NA	NA	NA	AALB008259	1
MZ22516950	NA	AARA008411	NA	NA	1
MZ22516969	AGAP008576	NA	NA	NA	1
MZ22516993	NA	AARA001290	NA	NA	1
MZ22517039	NA	NA	NA	AALB002295	1
MZ22517084	NA	AARA011844	NA	AALB001327	2
MZ22517085	NA	NA	NA	AALB005185	1
MZ22517093	NA	AARA000206	NA	NA	1
MZ22517099	NA	NA	AMIN000261	NA	1
MZ22517112	NA	NA	AMIN001437	AALB000697	2
MZ22517113	NA	NA	AMIN010001	AALB004250	2
MZ22517132	NA	NA	AMIN009253	NA	1
MZ22517147	NA	NA	NA	AALB008347	1
MZ22517173	NA	NA	NA	AALB005293	1
MZ22517249	NA	NA	NA	AALB008122	1
MZ22517254	NA	NA	AMIN000791	AALB002283	2
MZ22517263	NA	NA	NA	AALB014493	1
MZ22517274	NA	NA	AMIN007598	NA	1
MZ22517293	NA	AARA006969	NA	NA	1
MZ22517349	NA	AARA001878	NA	NA	1
MZ22517399	NA	AARA002398	AMIN007432	AALB004807	3
MZ22517442	NA	NA	AMIN006685	NA	1
MZ22517455	NA	NA	AMIN001809	NA	1
MZ22517462	NA	NA	AMIN011585	NA	1
MZ22517466	NA	NA	AMIN008714	NA	1
MZ22517469	AGAP010564	NA	NA	AALB010238	2
MZ22517502	AGAP000167	NA	NA	NA	1
MZ22517521	NA	NA	AMIN007775	NA	1
MZ22517561	NA	NA	AMIN010423	NA	1
MZ22517590	NA	NA	AMIN008486	AALB010755	2
MZ22517598	NA	NA	AMIN000388	NA	1
MZ22517636	NA	AARA008422	NA	NA	1
MZ22517690	NA	NA	AMIN001691	AALB001019	2
MZ22517787	NA	AARA002842	NA	NA	1
MZ22517869	AGAP005799	NA	NA	NA	1
MZ22517907	NA	NA	NA	AALB008902	1
MZ22517942	NA	NA	NA	AALB007865	1
MZ22517945	NA	NA	NA	AALB005199	1
MZ22517955	NA	NA	NA	AALB007638	1
MZ22517977	NA	AARA003092	NA	NA	1
MZ22517983	NA	NA	AMIN001852	NA	1
MZ22517997	NA	NA	AMIN010478	NA	1
MZ22518158	NA	NA	NA	AALB004786	1
MZ22518159	NA	NA	NA	AALB006023	1
MZ22518240	NA	NA	AMIN011342	NA	1
MZ22518245	NA	NA	NA	AALB008301	1
MZ22518292	NA	NA	NA	AALB010475	1
MZ22518323	AGAP005071	NA	NA	AALB007829	2
MZ22518379	NA	NA	NA	AALB006709	1
MZ22518446	NA	AARA002196	NA	NA	1
MZ22518462	AGAP007722	AARA008271	NA	NA	2
MZ22518489	NA	NA	AMIN001030	NA	1
MZ22518502	NA	NA	NA	AALB009223	1
MZ22518580	NA	NA	AMIN003253	NA	1
MZ22518581	NA	NA	AMIN001527	NA	1
MZ22518621	NA	NA	NA	AALB007079	1
MZ22518677	NA	AARA011985	NA	NA	1
MZ22518688	NA	NA	NA	AALB004768	1
MZ22518699	NA	NA	AMIN005837	NA	1
MZ22518787	NA	NA	NA	AALB009422	1
MZ22518795	NA	NA	AMIN006171	NA	1
MZ22518888	NA	NA	NA	AALB001323	1
MZ22518943	AGAP007643	AARA008206	AMIN010284	NA	3
MZ22519002	AGAP007172	NA	NA	AALB005664	2
MZ22519094	NA	NA	NA	AALB007329	1
MZ22519147	NA	AARA008251	NA	NA	1
MZ22519203	NA	NA	AMIN007539	NA	1
MZ22519303	AGAP008481	NA	NA	NA	1
MZ22519307	NA	AARA002864	NA	AALB009799	2
MZ22519326	NA	NA	AMIN003561	NA	1
MZ22519358	NA	NA	AMIN011645	NA	1
MZ22519455	NA	AARA000846	AMIN008235	NA	2
MZ22519464	NA	NA	NA	AALB001375	1
MZ22519485	AGAP004559	NA	NA	NA	1
MZ22519500	NA	NA	AMIN001598	NA	1
MZ22519513	NA	NA	AMIN007850	AALB005227	2
MZ22519522	NA	NA	NA	AALB000756	1
MZ22519531	NA	NA	NA	AALB003973	1
MZ22519536	AGAP002286	NA	NA	NA	1
MZ22519555	NA	NA	NA	AALB000719	1
MZ22519589	NA	NA	AMIN005816	NA	1
MZ22519620	NA	NA	NA	AALB008735	1
MZ22519645	AGAP009901	NA	NA	NA	1
MZ22519687	NA	NA	AMIN006655	NA	1
MZ22519692	AGAP007620	AARA008182	NA	AALB005401	3
MZ22519723	NA	AARA009993	NA	NA	1
MZ22519737	NA	AARA001636	NA	NA	1
MZ22519753	NA	NA	AMIN000571	NA	1
MZ22519783	NA	NA	NA	AALB006979	1
MZ22519834	NA	AARA002600	NA	NA	1
MZ22519839	NA	NA	AMIN010498	NA	1
MZ22519869	NA	NA	NA	AALB003673	1
MZ22519944	NA	NA	NA	AALB006069	1
MZ22519957	NA	NA	NA	AALB003231	1
MZ22520009	NA	NA	NA	AALB005730	1
MZ22520012	NA	NA	AMIN011002	AALB004132	2
MZ22520020	NA	NA	NA	AALB010140	1
MZ22520160	NA	NA	NA	AALB004755	1
MZ22520330	NA	AARA001787	NA	NA	1
MZ22520403	NA	NA	NA	AALB000846	1
MZ22520414	AGAP007392	AARA008006	NA	NA	2
MZ22520438	NA	AARA001788	NA	NA	1
MZ22520451	NA	NA	AMIN001178	NA	1
MZ22520456	NA	NA	AMIN010602	AALB005532	2
MZ22520473	NA	AARA000790	AMIN004430	NA	2
MZ22520647	NA	NA	NA	AALB004039	1
MZ22520683	NA	NA	NA	AALB005168	1
MZ22520688	NA	AARA001295	NA	NA	1
MZ22520706	NA	NA	AMIN009794	NA	1
MZ22520727	NA	AARA006723	NA	NA	1
MZ22520730	NA	AARA000578	NA	AALB010823	2
MZ22520731	NA	NA	NA	AALB008398	1
MZ22520805	NA	AARA008421	NA	NA	1
MZ22520808	NA	NA	AMIN007551	NA	1
MZ22520810	NA	NA	AMIN010897	NA	1
MZ22520838	NA	NA	AMIN005513	NA	1
MZ22520905	NA	NA	NA	AALB004014	1
MZ22520913	AGAP003811	NA	NA	NA	1
MZ22520937	AGAP001207	NA	NA	NA	1
MZ22520984	NA	NA	AMIN002466	NA	1
MZ22520989	NA	NA	AMIN010868	NA	1
MZ22521004	NA	NA	AMIN010344	NA	1
MZ22521012	NA	NA	NA	AALB008561	1
MZ22521143	NA	AARA009089	NA	NA	1
MZ22521167	NA	NA	AMIN001167	NA	1
MZ22521178	NA	NA	AMIN007662	NA	1
MZ22521201	NA	NA	AMIN009741	NA	1
MZ22521202	AGAP011716	NA	AMIN008744	AALB010064	3
MZ22521233	NA	NA	AMIN007431	AALB004808	2
MZ22521248	NA	NA	NA	AALB001249	1
MZ22521313	NA	NA	NA	AALB003132	1
MZ22521387	NA	AARA001766	NA	NA	1
MZ22521449	NA	NA	NA	AALB010657	1
MZ22521466	AGAP004929	NA	NA	NA	1
MZ22521487	NA	AARA010891	NA	AALB000959	2
MZ22521490	AGAP012168	NA	NA	NA	1
MZ22521531	NA	NA	NA	AALB000600	1
MZ22521591	NA	NA	AMIN008891	NA	1
MZ22521621	NA	NA	AMIN003867	NA	1
MZ22521622	NA	AARA010380	NA	NA	1
MZ22521626	NA	AARA006968	NA	NA	1
MZ22521633	NA	NA	AMIN010184	AALB006124	2
MZ22521653	NA	NA	AMIN001400	NA	1
MZ22521681	NA	NA	NA	AALB007189	1
MZ22521685	NA	NA	AMIN003000	NA	1
MZ22521713	NA	AARA004510	NA	NA	1
MZ22521714	NA	NA	NA	AALB003532	1
MZ22521744	AGAP007764	NA	NA	NA	1
MZ22521755	NA	NA	NA	AALB004759	1
MZ22521780	AGAP013303	NA	NA	NA	1
MZ22521813	NA	AARA003779	NA	NA	1
MZ22521820	NA	NA	AMIN001438	NA	1
MZ22521824	NA	NA	AMIN010424	NA	1
MZ22521826	NA	NA	AMIN005849	NA	1
MZ22521845	NA	AARA002665	AMIN008809	NA	2
MZ22521884	NA	NA	NA	AALB009538	1
MZ22521923	AGAP003388	NA	NA	NA	1
MZ22521939	NA	NA	NA	AALB002611	1
MZ22521950	NA	NA	AMIN005852	NA	1
MZ22521958	NA	NA	NA	AALB007859	1
MZ22521962	NA	NA	NA	AALB008214	1
MZ22522088	NA	NA	AMIN004494	NA	1
MZ22522111	NA	NA	NA	AALB009005	1
MZ22522186	NA	NA	AMIN002837	NA	1
MZ22522263	NA	NA	AMIN008524	NA	1
MZ22522278	NA	NA	NA	AALB006974	1
MZ22522280	NA	NA	NA	AALB004970	1
MZ22522366	NA	NA	NA	AALB008720	1
MZ22522406	NA	AARA007609	NA	NA	1
MZ22522418	NA	NA	NA	AALB001640	1
MZ22522425	NA	NA	NA	AALB010085	1
MZ22522426	NA	NA	NA	AALB005290	1
MZ22522454	NA	AARA000193	NA	NA	1
MZ22522507	NA	NA	AMIN008928	NA	1
MZ22522551	NA	NA	AMIN004793	NA	1
MZ22522552	NA	NA	AMIN010941	NA	1
MZ22522626	NA	NA	NA	AALB010477	1
MZ22522666	AGAP006937	NA	NA	NA	1
MZ22522725	NA	AARA010152	NA	AALB008529	2
MZ22522780	AGAP007751	NA	AMIN006335	AALB000490	3
MZ22522790	NA	AARA002998	NA	NA	1
MZ22522820	NA	AARA007887	NA	NA	1
MZ22522846	NA	NA	NA	AALB002101	1
MZ22522922	NA	AARA014216	NA	NA	1
MZ22523050	NA	NA	NA	AALB003674	1
MZ22523099	NA	NA	NA	AALB007541	1
MZ22523173	NA	NA	AMIN005912	NA	1
MZ22523182	NA	NA	NA	AALB009338	1
MZ22523216	NA	NA	AMIN008892	NA	1
MZ22523230	NA	NA	NA	AALB004787	1
MZ22523291	NA	NA	NA	AALB005299	1
MZ22523292	AGAP007922	NA	NA	NA	1
MZ22523368	NA	AARA002420	NA	NA	1
MZ22523491	AGAP001268	NA	NA	NA	1
MZ22523512	NA	NA	NA	AALB004507	1
MZ22523515	NA	NA	AMIN008912	NA	1
MZ22523647	NA	NA	NA	AALB003468	1
MZ22523697	AGAP013137	NA	NA	NA	1
MZ22523829	NA	NA	NA	AALB007274	1
MZ22523851	AGAP011320	NA	NA	NA	1
MZ22523853	NA	NA	NA	AALB006604	1
MZ22523875	NA	AARA003703	NA	NA	1
MZ22523900	NA	NA	NA	AALB008406	1
MZ22524014	NA	NA	NA	AALB005356	1
MZ22524021	NA	NA	NA	AALB010342	1
MZ22524030	NA	NA	AMIN006611	NA	1
MZ22524038	NA	NA	AMIN005997	NA	1
MZ22524068	NA	NA	NA	AALB010107	1
MZ22524167	AGAP004936	NA	NA	NA	1
MZ22524180	NA	NA	NA	AALB005169	1
MZ22524285	AGAP002357	NA	NA	NA	1
MZ22524318	NA	NA	AMIN008434	NA	1
MZ22524357	NA	AARA009070	NA	AALB006184	2
MZ22524363	NA	NA	AMIN003243	NA	1
MZ22524366	NA	AARA007485	NA	AALB004575	2
MZ22524416	AGAP004606	NA	NA	NA	1
MZ22524447	NA	NA	AMIN002646	AALB006562	2
MZ22524493	AGAP002921	NA	NA	NA	1
MZ22524506	NA	AARA008840	NA	AALB010645	2
MZ22524612	NA	NA	AMIN011165	NA	1
MZ22524660	NA	NA	AMIN006084	NA	1
MZ22524691	NA	NA	AMIN006686	AALB000860	2
MZ22524779	NA	AARA007976	NA	NA	1
MZ22524797	NA	AARA008983	NA	NA	1
MZ22524831	AGAP009824	NA	NA	NA	1
MZ22524880	NA	AARA003129	NA	NA	1
MZ22524885	NA	NA	AMIN007118	NA	1
MZ22524955	NA	NA	AMIN005520	NA	1
MZ22525037	NA	NA	AMIN002457	NA	1
MZ22525070	NA	NA	NA	AALB008889	1
MZ22525092	AGAP004778	AARA006027	AMIN008118	NA	3
MZ22525162	NA	NA	AMIN007560	NA	1
MZ22525187	NA	NA	NA	AALB003264	1
MZ22525239	NA	NA	NA	AALB009784	1
MZ22525263	NA	NA	NA	AALB006213	1
MZ22525297	NA	NA	AMIN003002	NA	1
MZ22525300	NA	AARA004257	NA	NA	1
MZ22525379	AGAP011250	NA	NA	NA	1
MZ22525380	NA	NA	NA	AALB000535	1
MZ22525391	AGAP009672	NA	NA	NA	1
MZ22525413	NA	NA	AMIN002400	NA	1
MZ22525470	AGAP007721	AARA008270	NA	NA	2
MZ22525476	NA	NA	AMIN009192	NA	1
MZ22525628	NA	AARA010500	NA	NA	1
MZ22525629	AGAP001335	AARA001796	AMIN000524	NA	3
MZ22525667	AGAP010565	NA	NA	NA	1
MZ22525767	NA	NA	NA	AALB004725	1
MZ22525777	NA	NA	NA	AALB001668	1
MZ22525824	NA	NA	NA	AALB006580	1
MZ22525873	AGAP013768	NA	NA	NA	1
MZ22525958	NA	AARA002402	AMIN007428	AALB004812	3
MZ22526039	NA	NA	AMIN006957	NA	1
MZ22526126	NA	AARA007327	NA	NA	1
MZ22526294	NA	NA	AMIN000682	AALB002875	2
MZ22526315	NA	NA	NA	AALB005784	1
MZ22526336	NA	NA	NA	AALB003266	1
MZ22526341	NA	NA	NA	AALB010824	1
MZ22526401	NA	AARA002030	NA	NA	1
MZ22526427	NA	NA	AMIN008527	NA	1
MZ22526455	AGAP011251	NA	NA	NA	1
MZ22526457	NA	AARA003413	NA	AALB010797	2
MZ22526630	NA	NA	NA	AALB004245	1
MZ22526771	NA	NA	NA	AALB006613	1
MZ22526813	AGAP004213	NA	AMIN004140	NA	2
MZ22526882	NA	NA	NA	AALB007575	1
MZ22526898	NA	NA	NA	AALB000522	1
MZ22526969	NA	NA	NA	AALB003601	1
MZ22527063	NA	AARA014600	NA	NA	1
MZ22527124	NA	NA	AMIN006082	NA	1
MZ22527217	NA	NA	AMIN005853	NA	1
MZ22527322	NA	NA	AMIN005850	NA	1
MZ22527391	NA	AARA006304	NA	NA	1
MZ22527556	AGAP002399	NA	NA	NA	1
MZ22527564	NA	NA	AMIN011037	NA	1
MZ22527787	NA	NA	AMIN009937	NA	1
MZ22527840	NA	AARA000204	NA	NA	1
MZ22527913	NA	NA	NA	AALB009894	1
MZ22529945	AGAP010639	NA	NA	NA	1

## Sheet: Legend
Column names	Explanation
OrthoGroup	Orthogroup identifier
gam_spliced	Gene found sex- or tissue- specifically spliced in An. gambiae
ara_spliced	Gene found sex- or tissue- specifically spliced in An. arabiensis
min_spliced	Gene found sex- or tissue- specifically spliced in An. minimus
alb_spliced	Gene found sex- or tissue- specifically spliced in An. albimanus
num_spliced	Number of species in which a gene is found sex- or tissue-specifically spliced
